# Supplementary material for: The Association of R-Loop Binding Proteins Subtypes with CIN Implicates Therapeutic Strategies in Colorectal Cancer
Source: MDPI journal article supplement (doi:10.3390/cancers14225607), 2022-11-15
Supplement: s1 [file s1]

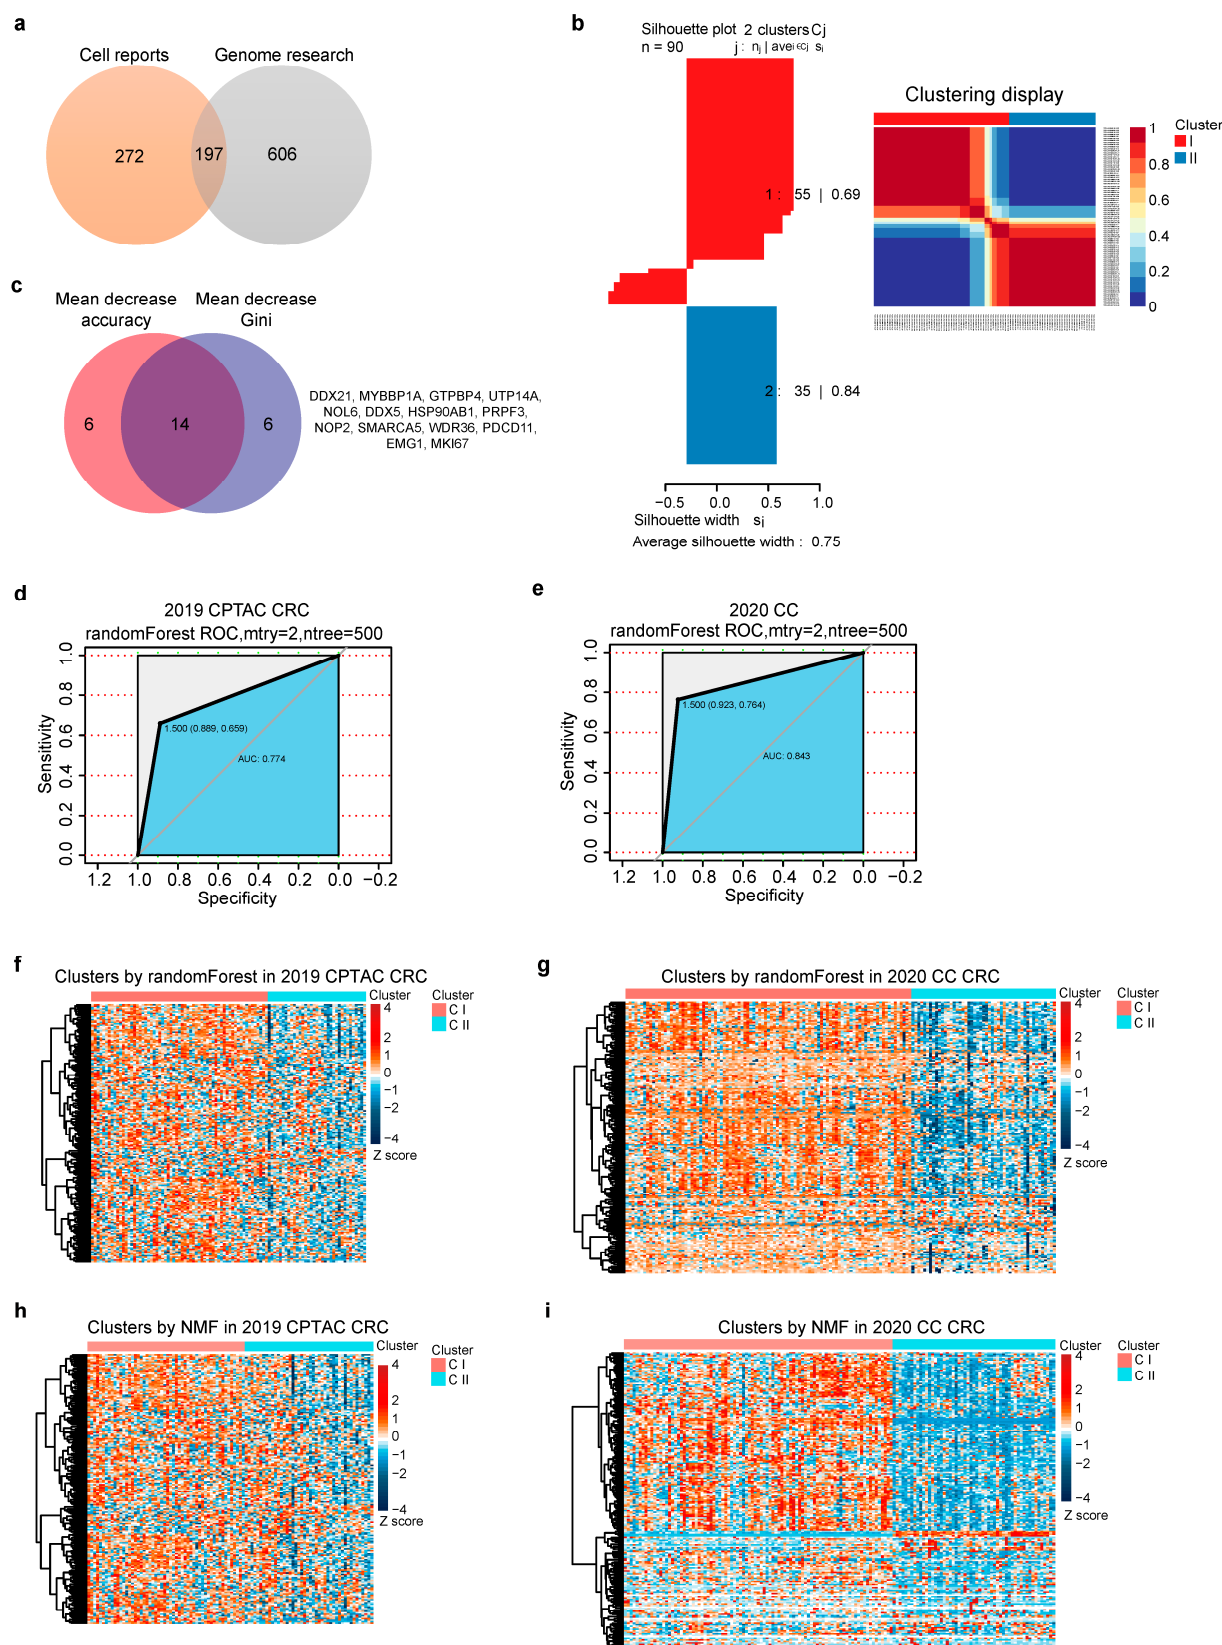

**Figure S1.** Proteomics-based molecular subtypes by the random forest model in 2019 and 2020 CRC data-bases.

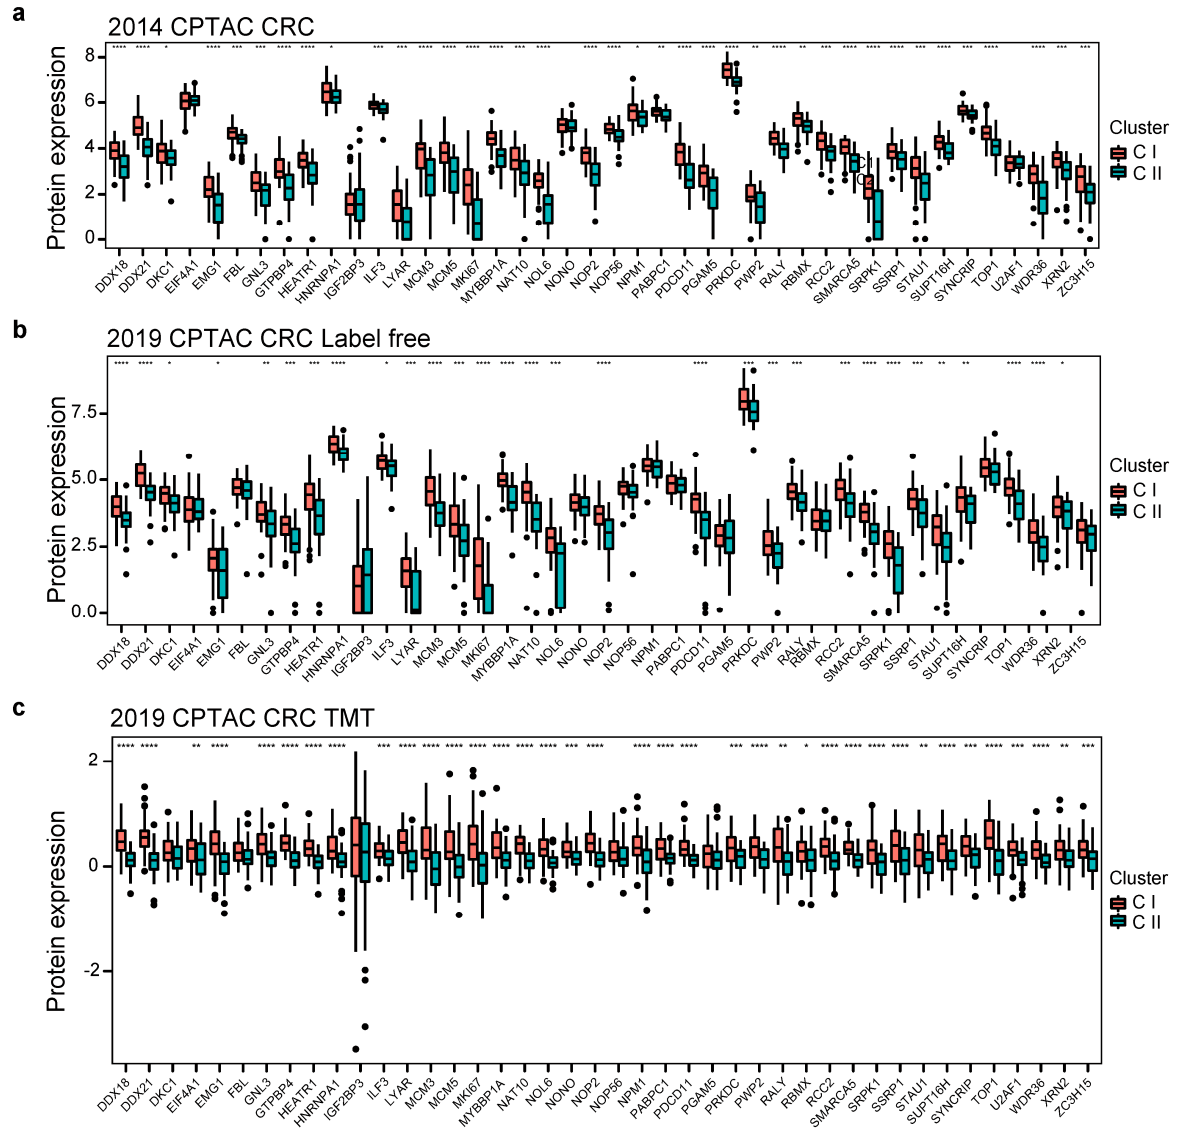

**Figure S2.** Proteomics-based clustering of RLBP's expression in CRC patients.

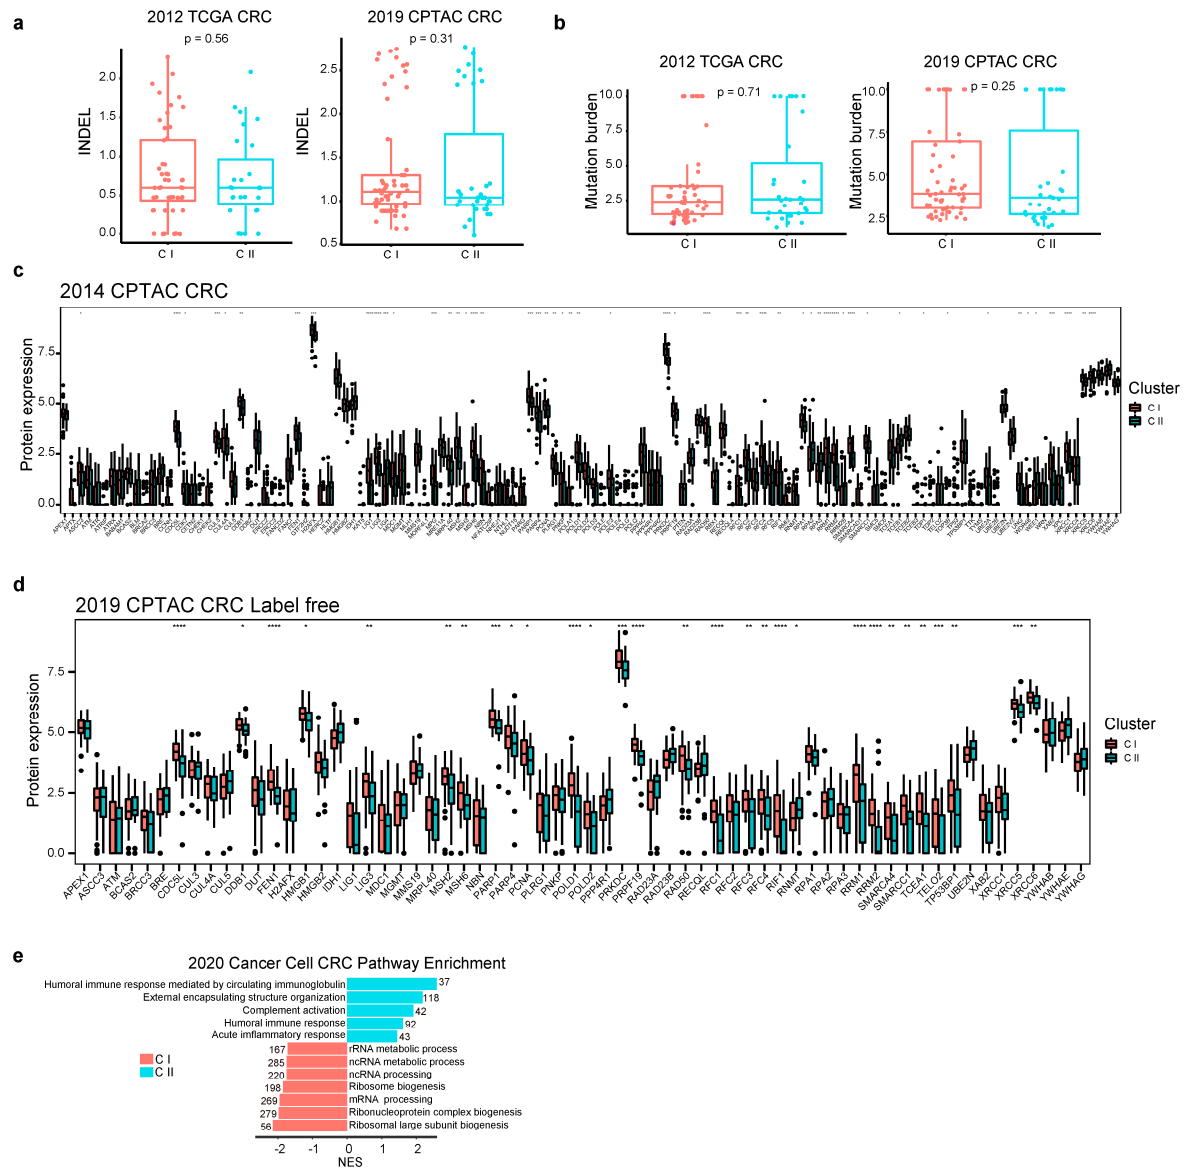

**Figure S3.** Landscape of pathway enrichment and DDR genes expression in two clusters.

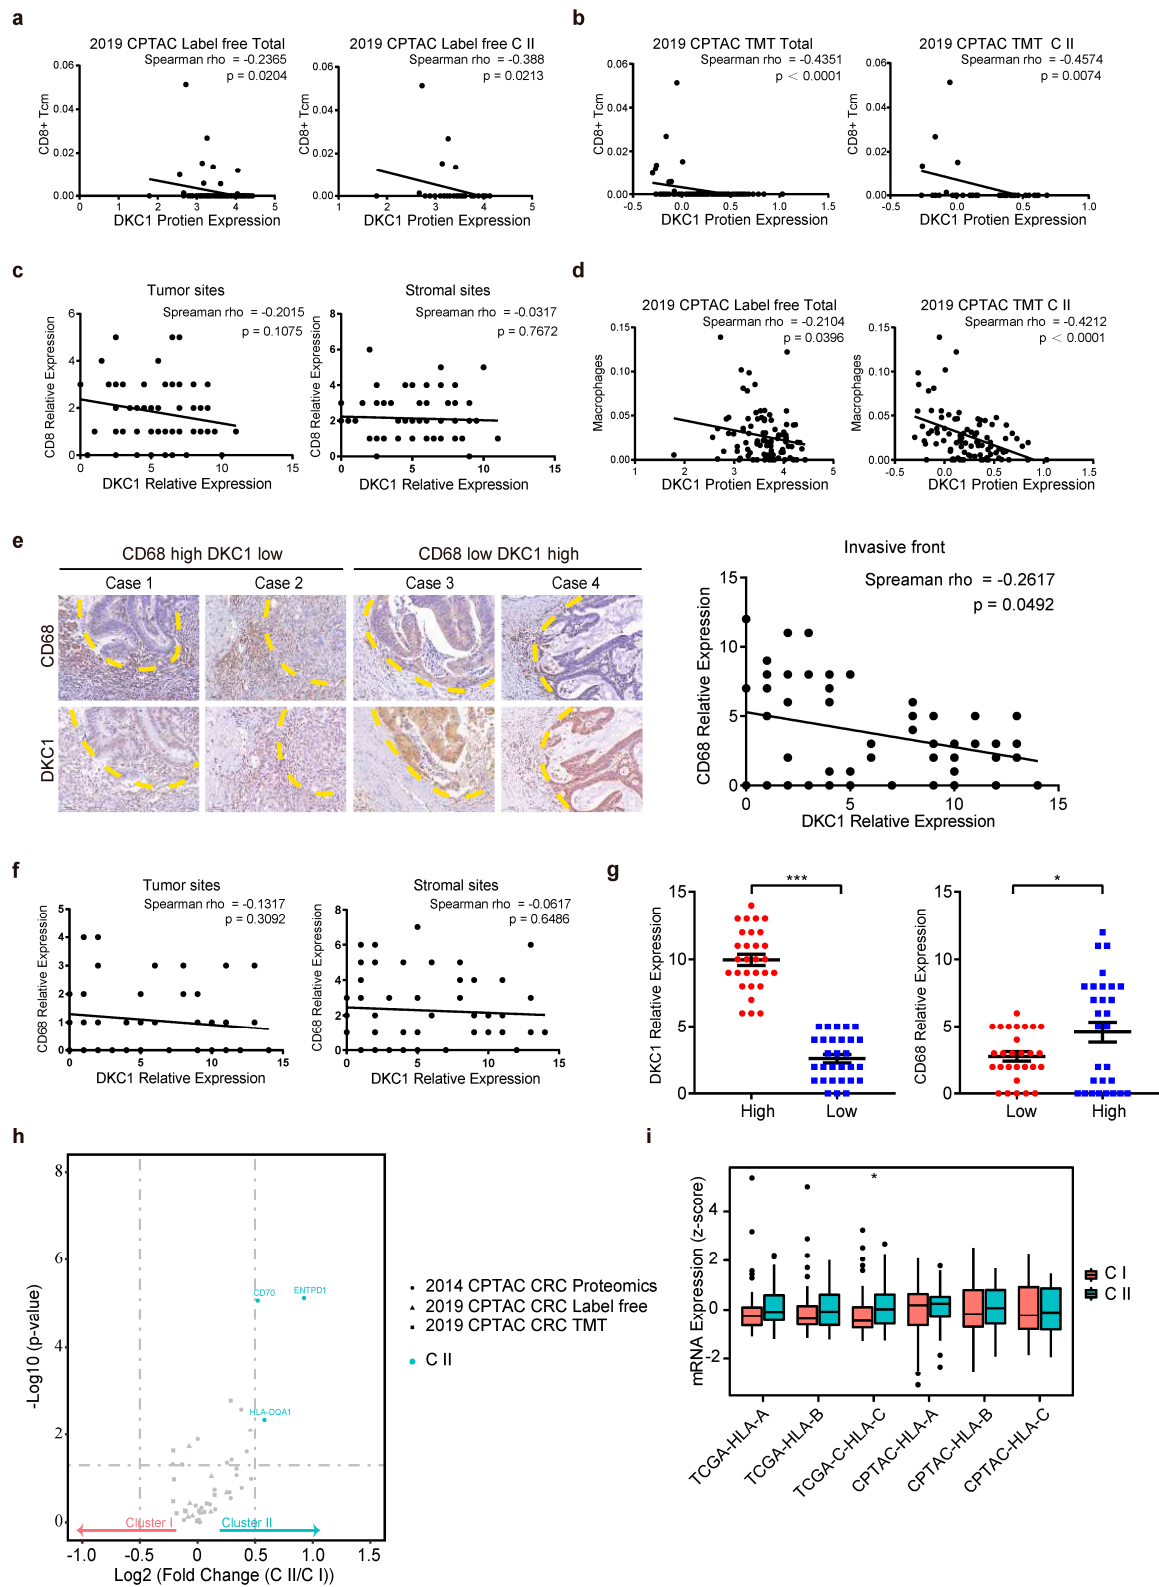

**Figure S4.** The correlation of RLBP with immunomodulatory factors.

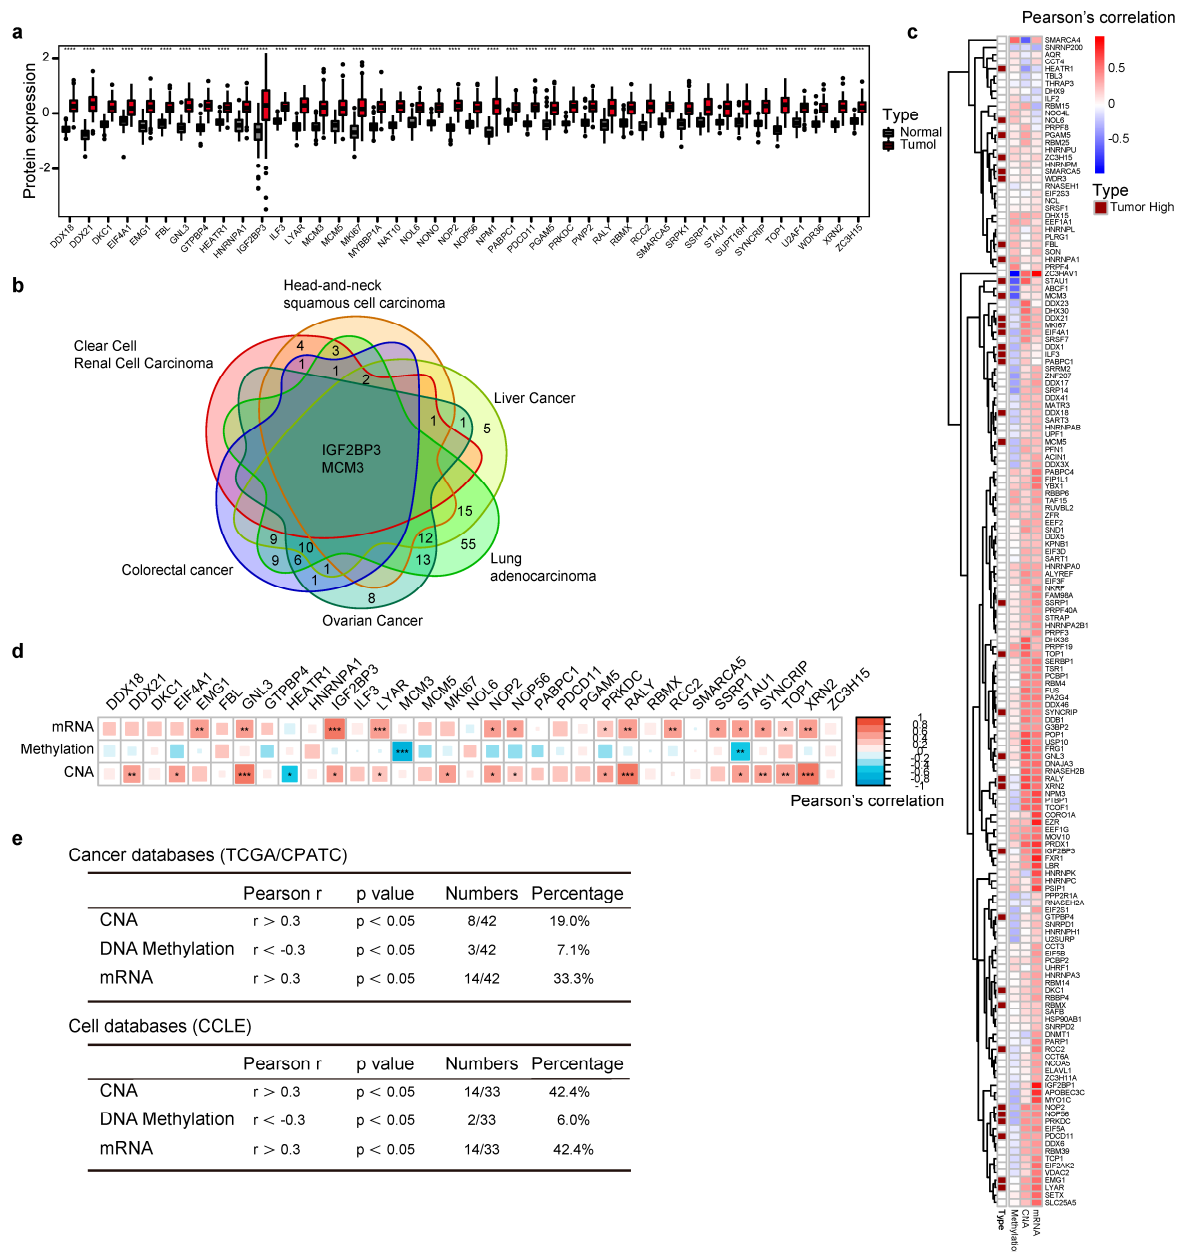

**Figure S5.** The RLBP are affected by CNA, DNA methylation (promoter CpG clusters) or transcriptional regulations.

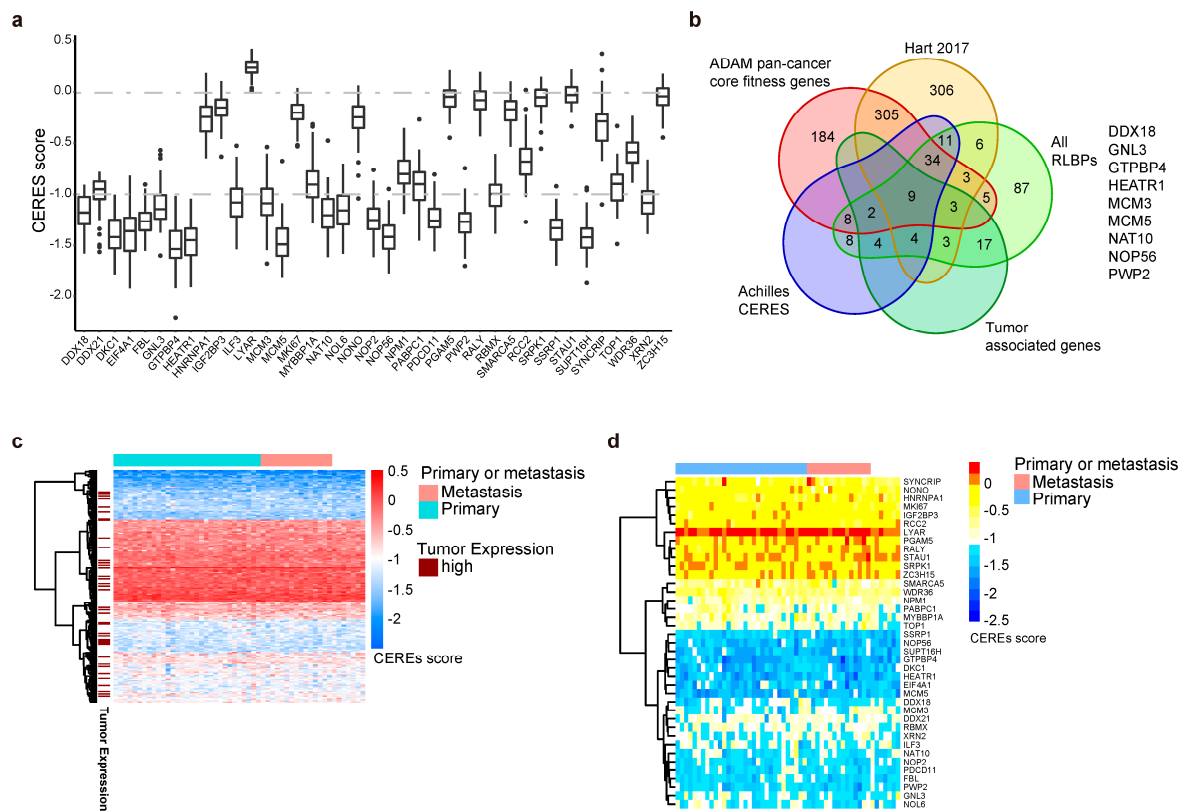

**Figure S6.** RLBP's serve as potential therapeutic targets.

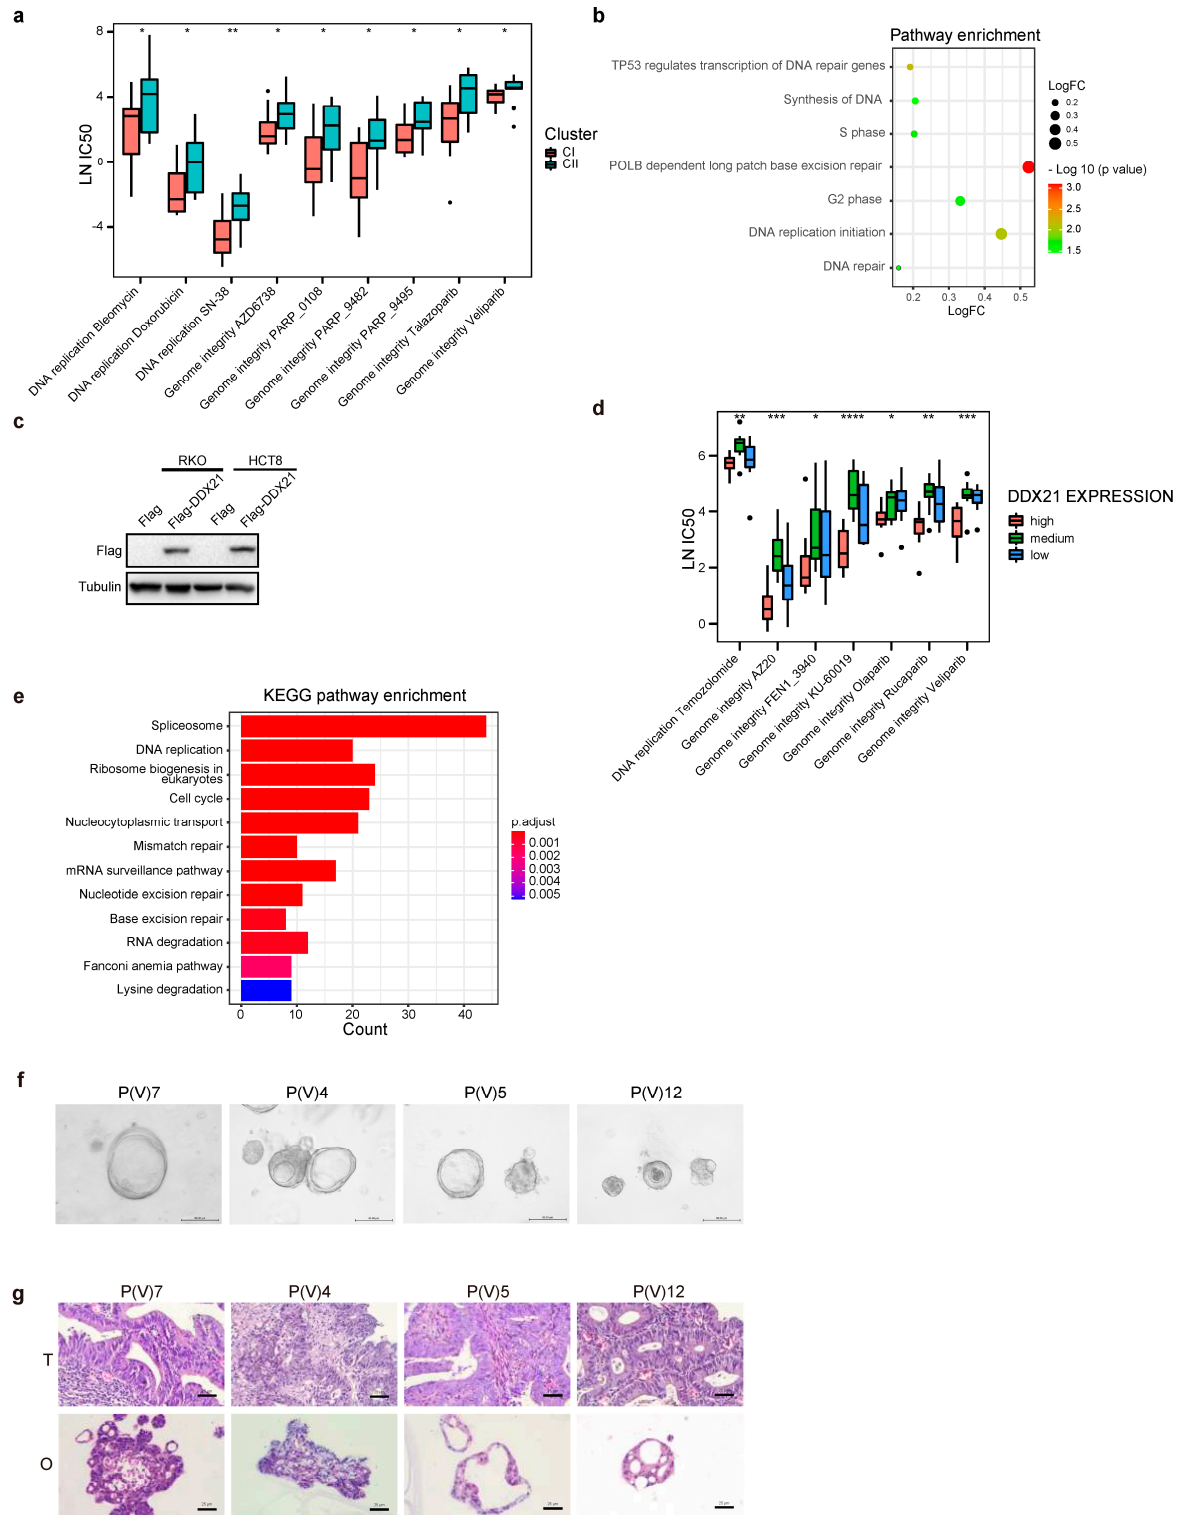

**Figure S7.** The Drug sensitivity analysis in cells with differential RLBP expression.
