# Supplementary material for: The Association of R-Loop Binding Proteins Subtypes with CIN Implicates Therapeutic Strategies in Colorectal Cancer
Source: Cancers (Basel). 2022 Nov 15;14(22):5607. doi: 10.3390/cancers14225607 (PMC9688457; doi:10.3390/cancers14225607)
Supplement: Supplementary file 1 [file cancers-14-05607-s001.zip]

Archive with 7 entries (7 files):
- cancers-1997776-supplementary.pdf
- Table S1.xlsx
- Table S2.xlsx
- Table S3.xlsx
- Table S4.xlsx
- Table S5.xlsx
- Table S6.xlsx
