# Supplementary material for: The Association of R-Loop Binding Proteins Subtypes with CIN Implicates Therapeutic Strategies in Colorectal Cancer
Source: Cancers (Basel). 2022 Nov 15;14(22):5607. doi: 10.3390/cancers14225607 (PMC9688457; doi:10.3390/cancers14225607)
Supplement: Supplementary file 1 [file cancers-14-05607-s001.zip › Table S1.xlsx]

## Sheet: Description
Table S1: The consistent expressions of RLBPs in two cluster and predictions for prognosis. Related to Figure 1 and S1-2.
Sheet	Description
Table S1a	A list of 204 RLBPs.
Table S1b	90 CRC patients living status in 2014 CPTAC database and 204 RLBPs proteins expression in these patients.
Table S1c	204 RLBPs protein expression in clusters CI and CII in 2014 CPTAC, 2019 CPTAC, 2020 Cancer cell CRC proteomic databases.
Table S1d	p value of Kaplan-Meier curves for overall survial in 2014 CPTAC CRC patients in total, CI or CII clusters.

## Sheet: Table S1a
ABCF1
ACIN1
ALYREF
APOBEC3C
AQR
BUB3
C14orf166
CCT3
CCT4
CCT6A
CCT8
CDC5L
CLTC
CMAS
CORO1A
DARS
DDB1
DDX1
DDX17
DDX18
DDX21
DDX23
DDX3X
DDX41
DDX46
DDX5
DDX6
DHX15
DHX30
DHX36
DHX9
DKC1
DNAJA3
DNMT1
EEF1A1
EEF1G
EEF2
EIF2AK2
EIF2S1
EIF2S3
EIF3D
EIF3F
EIF4A1
EIF5A
EIF5B
ELAVL1
EMG1
ENO1
EZR
FAM98A
FBL
FIP1L1
FRG1
FUS
FXR1
G3BP2
GNB2L1
GNL3
GTPBP4
HEATR1
HIST1H1B
HIST1H2BC
HNRNPA0
HNRNPA1
HNRNPA2B1
HNRNPA3
HNRNPAB
HNRNPC
HNRNPH1
HNRNPK
HNRNPL
HNRNPM
HNRNPU
HNRNPUL1
HNRNPUL2
HSP90AB1
IGF2BP1
IGF2BP3
ILF2
ILF3
KPNB1
LARP1
LARS
LBR
LYAR
MAP4
MATR3
MCM3
MCM5
MKI67
MOV10
MYBBP1A
MYH9
MYO1C
NAT10
NCL
NCOA5
NKRF
NOC4L
NOL6
NONO
NOP2
NOP56
NOP58
NPM1
NPM3
PA2G4
PABPC1
PABPC4
PARP1
PCBP1
PCBP2
PDCD11
PFN1
PGAM5
PHGDH
PLEC
PLRG1
POP1
PPP2R1A
PRDX1
PRKDC
PRPF19
PRPF3
PRPF4
PRPF40A
PRPF8
PSIP1
PTBP1
PWP1
PWP2
RAB7A
RAC2
RALY
RARS
RBBP4
RBBP6
RBM14
RBM15
RBM25
RBM39
RBM4
RBMX
RCC2
RNASEH1
RNASEH2A
RNASEH2B
RNASEH2C
RTCB
RUVBL2
SAFB
SART1
SART3
SERBP1
SETX
SFPQ
SKIV2L2
SLC25A5
SMARCA4
SMARCA5
SND1
SNRNP200
SNRPD1
SNRPD2
SNW1
SON
SRP14
SRPK1
SRRM2
SRSF1
SRSF10
SRSF7
SSRP1
STAU1
STRAP
SUPT16H
SYNCRIP
TAF15
TARS
TBL3
TCOF1
TCP1
THRAP3
TOP1
TSR1
U2AF1
U2AF2
U2SURP
UHRF1
UPF1
USP10
UTP14A
VARS
VDAC2
WDR3
WDR36
XPG
XRN2
YBX1
ZC3H11A
ZC3H15
ZC3HAV1
ZFR
ZNF207

## Sheet: Table S1b
	CPTAC_sample_ID	days_to_last_known_alive	vital_status	Cluster	ABCF1	ACIN1	ALYREF	BUB3	C14orf166	CCT3	CCT4	CCT6A	CCT8	CDC5L	CLTC	CMAS	CORO1A	DARS	DDB1	DDX1	DDX17	DDX18	DDX21	DDX23	DDX3X	DDX46	DDX5	DDX6	DHX15	DHX30	DHX36	DHX9	DKC1	DNAJA3	DNMT1	EEF1A1	EEF1G	EEF2	EIF2AK2	EIF2S1	EIF2S3	EIF3D	EIF3F	EIF4A1	EIF5A	EIF5B	ELAVL1	EMG1	ENO1
1	TCGA.A6.3807.01	11.0667	0	II	2.27003	3.89885	3.89885	3.10992	3.82443	5.77514	5.65916	5.2838	5.77514	3.10992	7.74627	3.42403	5.2838	4.83778	3.89885	4.9855	5.46052	2.67205	3.75916	2.49313	5.25273	3.52021	5.04585	3.61117	4.21516	2.02148	1.33724	6.01309	3.61117	2.67205	2.27003	7.80645	6.09311	7.00727	2.49313	4.16189	4.5741	3.52021	3.89885	6.01309	4.83778	3.23113	3.89885	2.02148	6.89635
2	TCGA.A6.3808.01	9.26667	0	II	3.26103	3.26103	2.81147	2.4991	2.4991	5.63324	5.58276	5.28934	5.66931	2.81147	7.38796	3.56234	5.35567	4.6728	4.78206	4.60802	5.28934	3.26103	3.68743	1.37109	5.03151	2.81147	5.23138	3.56234	4.10713	2.04731	1.37109	6.14568	3.92061	0	3.05658	7.59061	5.32229	6.91898	2.04731	3.56234	4.49335	4.02266	3.05658	6.02532	5.15381	3.26103	4.35755	0	7.07146
3	TCGA.A6.3810.01	8.2	0	II	2.99518	3.31373	3.96717	3.67054	3.88166	5.70855	5.92821	4.84833	5.84197	3.67054	7.40565	3.7845	4.60644	4.60644	4.54514	5.14731	5.82731	3.44184	3.55745	2.00959	5.244	3.31373	5.244	3.67054	4.70173	1.60565	1.60565	6.31663	3.96717	2.57693	2.57693	7.61861	5.73335	7.09466	2.80185	4.21464	4.35144	3.44184	3.44184	6.11666	5.244	3.67054	4.60644	1.60565	7.12983
4	TCGA.AA.3518.01	1.03333	0	II	2.6477	3.57491	3.75203	2.98489	4.06752	5.88972	6.0036	5.3579	5.96363	3.666	7.66567	3.75203	5.46358	4.72701	5.05572	5.15218	5.61255	3.37202	4.4019	2.98489	5.15218	3.666	5.50547	3.75203	5.31566	2.20789	2.20789	6.32841	3.57491	2.82782	1.94611	7.87439	5.83962	7.64775	2.98489	3.90497	4.33581	3.98277	4.28021	6.21361	5.11839	3.47725	4.62449	0.635367	7.20144
5	TCGA.AA.3525.01	1.03333	0	II	2.97942	4.30791	3.85566	3.85566	3.57773	5.69135	5.66353	5.72574	6.24793	3.42044	7.7281	2.31421	5.20932	5.40588	4.95606	4.30791	5.87168	3.57773	5.14609	3.22136	5.53419	3.57773	5.89659	4.20633	4.95606	2.97942	0	6.55914	3.85566	3.22136	2.67657	7.97074	6.42195	7.65674	2.97942	4.30791	4.84566	3.99458	3.42044	6.24793	5.29597	4.20633	4.84566	1.82646	7.33169
6	TCGA.AA.3526.01	1	0	I	2.93483	3.27252	3.10992	4.09085	3.10992	5.904	5.87168	5.20932	6.16712	3.56153	6.92592	3.56153	6.07632	4.78416	4.71333	4.34104	5.6997	2.93483	4.63653	2.93483	5.09733	3.56153	5.63865	3.68519	5.47552	2.71076	2.12653	6.16712	2.43474	2.43474	1.3296	7.92013	6.10329	6.92592	3.79978	4.41504	4.17286	3.42134	4.71333	5.77698	4.555	2.43474	4.25449	1.76836	7.29119
7	TCGA.AA.3529.01	0	1	II	2.93797	3.5737	3.666	3.28983	3.96963	5.71918	5.55929	5.34885	5.95031	3.17259	7.581	4.22497	4.9985	4.82934	5.03151	5.06278	5.73796	3.75061	4.69803	2.7747	5.37051	3.666	5.31759	3.666	4.65115	2.39872	2.17632	6.31282	4.17153	2.39872	1.91584	8.01569	6.41785	7.20144	2.58336	3.90464	4.42582	4.11381	3.5737	6.57329	5.42246	3.666	4.42582	2.93797	7.13873
8	TCGA.AA.3531.01	0	0	I	2.54432	3.77891	3.56072	4.24919	3.42313	5.64904	5.56428	5.17499	6.10685	4.47465	7.06286	3.56072	4.55418	4.47465	5.00165	4.61667	6.04985	4.47465	5.4044	3.27302	5.26003	4.39917	5.82443	3.42313	5.26003	4.16993	1.59455	6.40031	3.10098	2.27501	3.27302	8.2113	6.32445	6.88939	2.93105	4.55418	4.85782	3.77891	4.24919	5.78468	4.47465	3.56072	4.85782	3.27302	7.33169
9	TCGA.AA.3534.01	1	0	II	2.69079	3.30012	3.86262	3.12818	3.43962	5.77698	5.55582	5.08972	5.88419	3.76058	7.34119	3.76058	4.60447	4.52398	5.03592	4.84666	5.46771	3.86262	3.76058	1.66903	4.71772	2.69079	5.27177	3.96963	4.15137	1.66903	1.66903	6.07282	3.30012	2.09986	1.66903	8.26541	6.10329	7.64775	2.09986	3.86262	3.66068	4.06752	3.66068	5.73796	5.30597	3.555	4.06752	1.03797	7.62858
10	TCGA.AA.3552.01	2.03333	0	II	3.41549	3.87971	4.02857	3.18587	2.4974	6.10685	5.72792	5.6199	6.31282	3.65	7.7281	4.37805	4.62449	4.93985	5.09114	4.72319	5.85375	3.73588	4.11825	2.4974	5.16591	3.30354	5.46956	3.87971	4.25952	3.04672	2.0072	6.35426	3.30354	3.30354	1.70192	8.51909	6.15502	7.35062	3.18587	3.95171	4.82222	3.65	3.95171	6.39523	4.93985	3.87971	4.19219	2.0072	7.2714
11	TCGA.AA.3554.01	0	0	II	2.67431	3.34104	3.86493	3.21309	3.34104	5.53771	5.60377	4.96594	6.00959	3.34104	7.7281	3.46728	5.60377	4.93168	4.51181	4.84666	5.70173	3.68332	4.80512	2.87447	5.53771	3.46728	5.46771	3.94579	4.51181	2.17206	1.83053	6.26266	2.87447	1.83053	1.83053	7.7688	6.09972	7.26297	2.87447	3.94579	4.57572	3.7761	3.68332	6.55449	5.11839	3.86493	4.63885	2.44714	6.91201
12	TCGA.AA.3558.01	1	0	I	3.02975	4.03972	3.69711	3.15381	3.3978	5.89271	5.74739	5.59106	6.47319	3.15381	7.97074	3.3978	5.10028	5.01421	5.30366	4.69803	5.67995	4.25802	4.81318	2.42582	5.06062	4.03972	5.16054	3.79147	4.96301	3.28392	1.38221	6.48768	3.28392	2.85333	1.79355	7.99303	6.12963	7.31076	2.42582	4.25802	5.10028	3.61157	3.69711	6.43084	5.40894	3.28392	4.87611	3.15381	6.93251
13	TCGA.AA.3561.01	1.03333	0	I	2.72028	3.46902	4.72447	3.89885	3.07153	6.32841	5.95582	5.70386	6.07632	4.26953	8.23844	4.26953	5.20137	5.27177	5.10308	4.61491	5.89466	4.34507	5.78171	3.35144	5.3339	4.04818	5.61657	3.35144	5.46358	4.34507	2.25399	6.81558	3.57612	2.4991	2.91201	7.59061	6.2755	7.92013	3.07153	3.35144	4.67337	4.26953	3.89885	5.40588	4.42246	4.47811	4.8748	2.0072	7.30101
14	TCGA.AA.3664.01	0	0	I	3.52523	3.52523	3.22033	3.05543	2.08859	6.15839	6.04374	5.20137	6.12963	4.22805	7.47457	3.38405	4.05947	5.16296	4.99337	5.04323	6.36749	4.05947	5.04323	3.05543	5.54246	4.35238	6.2292	3.87774	5.47703	3.52523	2.08859	6.79736	2.86658	2.08859	2.63072	7.83744	5.71113	7.66567	3.38405	4.5599	4.75132	4.14948	3.77153	6.6199	5.08817	3.22033	4.42582	1.74846	7.89793
15	TCGA.AA.3666.01	2.03333	1	I	2.98489	4.24362	4.03504	3.30012	3.73805	5.84197	5.88166	5.84197	6.09311	3.73805	7.5531	3.30012	4.29278	4.29278	4.94408	4.87889	5.9003	3.56194	5.76447	3.39598	5.35238	3.73805	5.57733	3.39598	4.64846	3.65459	2.35802	6.73037	4.14296	2.85067	2.35802	8.32325	6.33235	7.25449	2.98489	4.24362	4.87889	4.14296	3.65459	6.17019	5.35238	3.91584	4.64846	1.88752	7.42816
16	TCGA.AA.3672.01	0.933333	0	I	1.71809	4.3978	4.1235	3.89045	3.82409	6.03702	6.12681	5.66751	6.23317	3.42939	7.48527	3.05658	5.60999	4.46336	5.02296	5.1049	5.93719	4.19902	5.15489	3.75061	5.46956	4.69803	5.57884	4.26554	5.31904	2.0635	1.71809	6.37811	3.42939	2.34104	3.42939	7.97074	6.4489	7.39683	3.30354	4.46336	4.84566	4.1235	3.96778	6.50843	5.42984	3.18004	4.26554	2.7456	7.59962
17	TCGA.AA.3684.01	0	0	II	2.61117	3.56153	3.36691	2.80392	3.73697	5.78468	5.63691	5.05759	5.78468	2.97024	7.67598	3.73697	5.0066	4.33438	4.16618	5.17499	5.6199	2.40871	3.56153	2.40871	4.96054	3.23879	4.92805	3.56153	4.16618	1.46118	0.81284	6.15502	4.04614	2.80392	2.15164	7.74627	5.26541	7.00727	2.40871	3.89659	4.04614	3.4638	4.16618	5.99579	4.89433	2.80392	3.73697	1.83458	7.57132
18	TCGA.AA.3695.01	1.03333	0	I	3.55582	4.04818	4.55868	3.17739	3.66296	5.55929	5.58836	5.43207	5.95838	4.13011	7.53372	3.87807	4.25952	5.0048	5.22317	5.31566	5.93719	4.33342	4.68855	3.55582	5.40099	4.20111	5.50547	4.04818	4.55868	3.17739	2.41684	6.45724	3.32145	2.41684	2.63072	7.93241	6.30475	7.40565	3.17739	4.62838	4.92093	3.44449	4.04818	6.20268	5.03972	4.20111	4.92093	2.83592	6.95358
19	TCGA.AA.3710.01	1.03333	0	I	3.40871	3.7438	4.566	3.66183	4.02029	5.93153	5.75667	5.4247	5.84582	3.30597	7.94459	3.66183	5.55008	4.29278	4.61019	5.06523	5.84582	3.66183	4.52	3.50335	5.57289	3.7438	5.47854	3.82443	5.45022	2.31034	1.87709	6.39014	2.99277	1.87709	2.69153	7.67598	5.89659	7.89793	3.50335	4.39003	4.70007	4.11631	3.58256	6.14568	5.66931	3.82443	4.06379	2.86129	7.33169
20	TCGA.AA.3715.01	1	0	II	3.5177	2.41684	0.0191088	3.5177	4.01555	5.85375	5.7945	5.23138	5.83205	1.69302	7.53372	2.80254	6.04045	3.66297	3.77891	3.66297	5.12322	1.69302	3.5177	1.69302	5.23138	3.31373	5.40735	3.31373	4.37202	0.0191088	1.69302	5.26178	1.69302	1.69302	3.08463	7.48527	6.11666	6.73037	3.77891	3.77891	4.20006	3.31373	3.89918	6.11666	5.5137	2.41684	3.66297	2.41684	7.15711
21	TCGA.AA.3818.01	1	1	II	2.94985	3.08916	4.09592	2.79355	3.82646	5.58676	5.3579	4.7604	5.65754	2.79355	7.22007	3.65382	4.32481	4.6728	4.94142	5.15812	5.70386	3.20893	4.16939	2.15704	5.26878	3.20893	5.3339	3.65382	4.36644	1.85599	0	6.19088	3.43785	0.799087	1.46118	7.84871	5.74272	7.68622	2.40781	3.97269	4.24006	3.5509	3.5509	5.97529	4.94142	2.94985	4.24006	1.85599	7.42816
22	TCGA.AA.3848.01	1	0	I	3.49825	3.88199	4.07039	3.22805	3.80598	5.63324	5.59106	5.25336	5.77118	3.73191	7.7688	4.07039	5.07468	5.32229	5.4027	5.11103	6.00105	4.25096	5.35062	3.41368	5.54246	4.19088	5.65754	4.31325	4.50843	3.12102	1.38589	6.59395	3.9542	2.72828	3.12102	8.08813	6.72474	7.78821	2.72828	4.19088	4.84666	4.07039	4.01406	6.37446	4.99699	3.66031	4.7866	2.57693	7.18269
23	TCGA.AA.3864.01	1	0	I	3.46031	4.12267	4.17871	4.12267	3.36691	6.29254	6.031	5.81626	6.54941	3.8339	7.94459	3.75773	3.89853	5.16591	5.37527	4.96162	5.75667	3.89853	5.27327	2.74272	5.45703	3.96131	5.52878	3.89853	5.37527	2.74272	1.90046	5.94205	2.89724	1.20997	2.74272	8.4376	6.69655	7.89793	3.36691	4.4794	5.12571	4.337	3.89853	6.83002	5.47703	4.12267	5.27327	2.74272	7.33169
24	TCGA.AA.3986.01	1	0	II	2.71955	2.28392	2.28392	3.53564	3.09085	5.63517	5.45242	5.47552	5.50547	2.54267	7.25449	3.09085	4.13258	4.6565	4.81387	4.91329	5.57511	3.76765	4.05687	1.57854	5.22651	3.76765	5.31373	3.53564	5.0066	1.97697	1.57854	6.08958	2.91137	1.97697	0.941106	7.84871	5.60763	7.23656	2.71955	4.27401	4.27401	4.05687	3.76765	6.17326	5.47552	2.71955	3.95853	0	8.01569
25	TCGA.AA.3989.01	1	0	I	3.96378	4.41684	4.50208	3.19849	3.81558	6.08958	5.79684	5.6313	6.28873	3.65	8.00441	4.11991	5.19718	4.50208	5.44316	5.28934	5.71571	3.81558	4.55336	2.59773	5.40099	3.73697	5.56082	4.11991	4.80667	2.93105	2.14622	6.40826	3.88427	3.07268	1.18481	8.4376	6.50314	7.65673	2.77259	3.96378	5.15812	3.96378	3.81558	6.46869	5.13422	3.88427	5.369	2.93105	6.93907
26	TCGA.AA.A004.01	14.1333	0	II	2.42582	3.75987	3.75987	3.15056	4.06695	5.58836	5.54442	4.86443	5.71918	3.35144	7.80645	3.95575	4.94267	4.24184	3.95575	4.90014	5.54442	2.21205	2.62605	2.62605	4.94267	2.92726	4.94267	3.35144	4.24184	1.3296	0.701919	6.08958	3.88264	2.21205	2	7.7688	5.61657	7.22834	1.71663	3.69302	3.95575	3.26354	4.01941	6.07282	5.1565	2.42582	3.82239	0.701919	7.1921
27	TCGA.AA.A00A.01	18.2667	0	II	2.53107	3.28737	3.28737	3.555	4.36153	6.031	5.83962	5.3762	5.91377	3.555	7.64775	3.555	4.79667	4.8475	4.6728	4.61824	5.88972	3.67582	4.8475	2.75275	5.4334	3.67582	5.59106	2.9386	4.50483	2.75275	1.46118	6.38174	3.28737	1.46118	2.9386	7.4638	5.86435	7.28133	1.86394	4.05311	4.79667	3.88101	4.12433	6.32445	5.05412	1.86394	4.05311	2.53107	7.82608
28	TCGA.AA.A00E.01	30.4333	0	I	3.48886	3.85931	3.77153	3.48886	4.06523	6.14568	6.04374	5.72964	6.33235	3.56194	7.51196	3.31711	5.11839	4.56864	4.52	5.02399	5.88166	2.40781	5.2854	2.40781	5.41718	4.24995	5.60229	4.2945	5.19009	3.41233	1.43296	6.60526	3.56194	2.40781	2.92979	8.23844	5.77698	7.74627	2.92979	4.46858	4.67845	3.94048	4.06523	6.79025	5.53595	3.41233	4.80185	1.76836	7.59061
29	TCGA.AA.A00F.01	34.5	0	II	2.91456	3.42403	3.95295	3.3084	3.53439	5.80452	5.64904	5.57884	5.83205	2.91456	7.59962	3.80941	4.63653	5.30755	5.30755	4.92805	5.73335	3.42403	4.01614	2.11214	4.63653	3.18375	5.09831	3.42403	4.35238	2.37295	0.748461	6.28873	3.72392	2.91456	2.11214	8.18811	6.65926	7.47457	2.37295	4.12708	5.2838	3.72392	3.63266	6.08605	5.25399	3.80941	4.19219	2.11214	7.11263
30	TCGA.AA.A00J.01	18.2667	0	I	2.35614	3.55663	2.97942	3.69228	3.90014	5.88166	5.82443	5.06824	6.09972	3.29621	7.78821	3.15164	4.83895	4.24184	5.02975	5.02975	5.72137	4.01078	4.87889	3.55663	5.26729	3.55663	5.23317	3.90014	5.33795	2.35614	0	6.28021	3.55663	2.58976	2.79077	7.1921	5.30755	7.4638	2.58976	3.55663	4.66372	3.90014	3.80047	5.56082	5.5158	3.69228	4.08972	2.08859	7.74627
31	TCGA.AA.A00K.01	18.2667	0	II	2.59773	3.11659	3.81626	3.31952	3.81626	5.8189	5.972	5.60526	5.98732	3.31952	7.53372	3.31952	5.11686	4.36036	4.53107	4.8748	5.72792	3.11659	4.44073	2.88101	5.0003	3.66903	5.47552	3.81626	4.04847	2.22548	1.7627	6.05572	3.31952	1.07496	2.22548	7.94459	6.42195	7.35062	2.22548	4.44073	4.93326	3.11659	4.04847	5.67346	4.93326	3.31952	4.36036	2.22548	7.66567
32	TCGA.AA.A00N.01	4.06667	1	II	2.22239	3.30646	3.62059	3.10992	3.62059	5.42021	5.50695	4.94142	5.54246	2.89012	7.31076	2.22239	5.54246	4.35144	3.88297	4.42582	5.29964	2.22239	3.10992	2.22239	5.29964	1.56234	5.00165	3.62059	4.01257	1.56234	1.56234	5.67995	3.75738	0.00958605	0.00958605	7.28133	5.64193	6.9769	2.89012	4.01257	4.42582	3.62059	3.88297	6.17326	4.83778	2.89012	3.62059	0.00958605	7.5531
33	TCGA.AA.A00O.01	27.4	0	II	2.16993	3.42403	4.25802	3.05658	3.57087	5.90633	5.6151	5.16805	6.01309	3.05658	7.84871	3.42403	4.68967	4.21516	4.57652	4.57652	5.92061	2.55908	3.94798	2.38036	5.47552	2.16993	5.02768	4.12433	5.30913	3.66448	2.38036	6.36749	3.57087	3.34577	0	7.35062	5.85881	7.07146	2.55908	3.49442	4.07353	3.57087	3.27401	5.39894	4.76889	3.17366	4.01673	0	6.65344
34	TCGA.AA.A00R.01	1	0	I	2.3084	3.88427	3.88427	3.35191	3.88427	5.84582	5.63324	5.45878	6.00105	2.99277	7.54344	2.3084	5.75667	4.10713	4.21516	4.48629	5.73335	3.35191	4.53833	2.67205	5.58276	3.12653	5.39894	3.52899	5.02104	1.76553	1.37109	6.30475	3.96131	1.76553	3.81831	8.4376	5.93719	7.40565	2.84666	3.96131	4.8475	3.75096	3.75096	6.43563	5.65249	3.24691	4.42962	2.08406	7.92013
35	TCGA.AA.A00U.01	17.2333	0	I	3.27699	3.79285	4.06638	4.0006	3.46292	6.06946	5.80899	5.50927	6.2062	3.79285	7.69718	3.86921	4.30864	5.14609	5.14609	5.21413	6.00959	4.13011	5.11686	2.77681	5.47552	4.30864	5.75346	3.93546	5.24159	3.79285	2.42582	6.58406	4.06638	2.93231	3.555	8.2113	6.43084	7.79736	3.15597	4.56173	5.21413	4.25046	4.13011	6.74147	4.85033	4.30864	4.77821	2.60328	7.99303
36	TCGA.AA.A010.01	21.2667	0	II	2.58175	3.43118	3.31373	3.19954	4.10434	5.45242	5.55582	4.96594	5.65916	2.39689	7.61861	4.38174	5.52628	4.47552	4.26903	4.70819	5.24159	2.76695	2.39689	1.86394	4.7572	2.93357	4.8077	3.70413	4.10434	1.46118	0.815575	5.78171	3.31373	2.16135	1.46118	7.84871	5.78171	7.35062	2.39689	3.54267	4.15381	3.31373	3.70413	6.06946	5.1416	2.93357	3.43118	0.815575	6.91201
37	TCGA.AA.A017.01	15.2333	0	I	3.1964	3.2967	4.31952	3.39963	3.64386	5.92489	5.80899	5.26354	6.13545	3.4794	7.99303	3.7747	5.369	4.94408	4.69803	4.83778	6.02842	3.64386	4.76695	2.26504	5.4334	4.21075	5.62469	4.13038	4.97591	1.59773	2.26504	6.20971	3.64386	2.89012	2.26504	7.89793	5.8439	7.87439	2.61039	3.97514	4.46967	3.92061	4.03151	6.15839	5.30755	3.64386	4.03151	1.848	7.22007
38	TCGA.AA.A01C.01	15.2333	0	II	2.89401	3.80081	3.94392	3.2393	4.56702	5.71918	5.6893	5.07239	5.9447	3.58737	7.51196	3.80081	4.88818	4.56702	4.34199	5.02104	5.88671	3.34436	4.06523	3.12983	5.09733	3.80081	5.40588	3.87742	4.84666	2.24489	0.519374	6.37446	4.24235	2.7627	1.78381	7.84871	5.6893	7.2714	2.7627	4.17951	4.43829	3.87742	3.73913	6.2292	5.12447	3.58737	4.29106	1.46118	7.25449
39	TCGA.AA.A01D.01	1	0	II	2.87447	3.6523	3.50335	2.87447	4.2324	5.15435	5.31373	5.09255	5.09255	2.87447	7.38796	2.87447	5.52878	3.91775	4.02207	4.72319	4.94813	3.09536	3.30597	1.46118	5.22317	2.11437	4.66789	3.79978	3.79978	2.55908	1.46118	6.04045	3.79978	3.09536	2.11437	7.59061	5.84197	6.95358	2.87447	3.6523	4.94813	2.55908	3.50335	5.75667	5.22317	2.55908	3.91775	1.46118	7.24555
40	TCGA.AA.A01F.01	13.2	0	I	3.24286	3.05079	3.83895	3.05079	3.83895	5.91377	5.91377	5.83205	5.95582	3.55582	8.1128	2.24286	4.93058	5.22959	4.65421	4.93058	5.95582	3.55582	5.83205	2.24286	5.50695	4.15489	5.70598	3.95109	4.25172	2.56397	1.4489	6.56854	3.95109	2.56397	0.742725	7.80645	5.54823	7.94459	3.83895	4.05079	4.9985	3.39689	3.39689	5.6313	5.54823	3.95109	4.57572	2.24286	6.73037
41	TCGA.AA.A01I.01	12.1667	0	I	3.13969	3.55008	3.13969	3.66296	4.38405	5.97529	5.91121	5.31143	6.38595	4.10154	7.75758	4.17951	4.59016	5.28676	4.65421	4.97392	6.02532	3.41368	4.4467	3.13969	5.43207	3.27997	5.56621	3.66296	4.49846	1.14187	1.57854	6.57869	3.86592	1.91839	1.57854	7.82608	5.61255	7.34119	2.6523	4.31952	4.59016	4.17951	4.02473	6.57869	4.92805	3.86592	4.81677	2.20163	7.10367
42	TCGA.AA.A01K.01	13.2	0	II	2.99579	3.42671	4.09424	3.42671	3.42671	5.76447	5.46052	4.91472	5.81626	2.80598	7.7688	4.09424	4.91472	4.91472	5.02975	4.86707	5.70386	3.73697	4.86707	2.38589	5.53595	3.81694	5.46052	4.09424	4.43696	2.12653	2.12653	6.34495	4.37249	2.38589	1.81284	8.06167	6.11666	7.51196	2.12653	3.42671	4.49846	3.90464	3.81694	6.19876	5.30755	3.81694	5.14893	1.81284	6.87525
43	TCGA.AA.A01P.01	38.6	1	II	1.86394	4.07353	2.70487	3.61824	3.51181	5.56621	5.64193	4.97972	5.79216	2.46815	7.57132	2.46815	5.76907	4.44361	5.14037	4.93326	5.76907	2.70487	3.81352	3.37851	5.06666	3.71443	5.27749	3.51181	4.74308	1.86394	1.41864	6.26535	3.05658	1.41864	1.86394	7.87439	6.34044	7.12126	3.22342	3.81352	4.8475	3.37851	4.07353	6.28873	4.80047	3.22342	4.24133	0.736966	7.65673
44	TCGA.AA.A01R.01	35.5	0	I	3.6477	4.03621	4.03621	3.81147	3.6477	5.85616	5.83962	5.43207	6.25159	3.38313	7.75758	2.77821	5.76217	4.89724	5.03328	4.41684	5.91121	4.03621	5.0711	3.06695	5.39346	4.6728	5.61657	3.46031	5.26178	2.77821	1.96717	6.51559	3.38313	2.59773	3.55582	7.60856	5.99579	7.4638	3.55582	4.22805	4.61902	4.11103	4.22805	6.32054	5.66931	3.46031	4.82222	2.19114	7.38796
45	TCGA.AA.A01S.01	1.03333	0	I	3.46597	3.36644	4.48027	3.94111	4.03504	5.94205	6.0066	5.25273	6.26535	3.56153	8.25199	3.56153	4.42246	5.43474	5.14037	4.98155	6.02842	4.34388	5.74739	3.23624	5.67995	4.62059	5.81626	3.66827	5.20281	2.37851	2.12653	6.73597	3.94111	2.37851	3.23624	8.08813	6.26535	7.74627	2.12653	4.67393	4.82001	4.12433	3.94111	6.44012	4.94142	3.76199	4.98155	2.80185	7.47457
46	TCGA.AA.A01T.01	33.5	0	I	1.8953	3.97208	3.63769	4.07496	3.38957	5.80452	5.47854	5.13696	6.12681	4.42738	6.93907	4.48027	5.66751	4.73985	4.73985	4.27401	5.73534	3.07153	4.91855	2.89982	5.13696	3.2393	5.41414	3.2393	4.73985	2.48371	1.05427	6.06946	3.38957	2.71663	2.20789	7.77854	6.14866	6.68482	3.07153	3.75773	4.27401	2.89982	4.17313	5.32048	4.68107	3.2393	3.97208	1.8953	7.68622
47	TCGA.AA.A01V.01	35.5	0	II	3.09085	3.72574	3.96471	2.56965	4.03386	5.58035	5.30913	5.25147	5.72964	3.34577	7.48527	2.93483	5.41052	4.33247	4.57168	4.96162	5.45878	3.45242	3.89659	2.56965	5.20581	3.23113	5.0441	3.23113	4.21387	2.56965	1.7627	5.93153	3.45242	2.56965	0	7.92013	5.87168	7.40565	2.34293	4.09424	4.09424	3.34577	4.03386	5.74739	5.25147	3.81558	5.0711	1.34104	7.22834
48	TCGA.AA.A01X.01	26.3667	0	I	2.11326	4.01762	2.9386	3.83053	3.83053	5.80452	5.68267	5.14486	5.60526	3.39048	8.27984	4.01762	5.14486	5.19849	5.14486	5.0003	5.77698	4.19849	4.50716	3.62332	5.52878	4.19849	5.83466	3.51349	5.0003	4.32769	2.11326	7.00023	4.32769	2.77821	1.48886	7.18269	6.18692	7.51196	3.10098	3.92537	4.94813	3.83053	3.10098	5.49228	5.3852	4.37388	4.19849	2.11326	6.56854
49	TCGA.AA.A01Z.01	21.2667	0	I	1.87578	2.27501	3.16027	2.27501	3.68519	6.4446	5.30134	5.40588	6.13244	3.32	7.37923	2.58656	5.04148	3.68519	4.16028	3.88557	6.40826	4.4019	4.47811	1.87578	5.49367	2.99518	6.52482	3.32	4.99443	4.16028	0	5.9902	3.88557	1.87578	0	7.8616	5.93152	7.44609	3.16027	4.16028	4.4019	1.87578	4.62877	6.05875	3.88557	1.31034	4.4019	1.87578	7.12983
50	TCGA.AA.A022.01	0	0	I	2.70487	3.43741	4.11103	2.88101	3.84398	5.17938	4.94267	5.31143	5.21412	3.43741	7.62858	3.84398	4.34009	4.67957	4.98641	4.50292	5.77935	3.43741	3.93546	3.43741	5.09255	3.74631	5.52628	3.30548	4.76695	1.32193	1.32193	6.32445	2.70487	2.70487	0.659925	7.48527	5.63691	7.45497	3.93546	4.11103	3.93546	3.63769	3.74631	6.17019	5.60999	2.70487	4.27327	1.70192	7.74627
51	TCGA.AA.A024.01	39.6	1	II	2.56722	3.17259	3.44537	3.17259	3.31904	5.79216	5.33973	5.43929	5.61657	2.27898	7.80645	3.79008	3.44537	4.9985	5.19587	5.11575	5.48575	2.99277	3.555	2.79909	4.9486	3.31904	5.03972	3.17259	4.39323	1.51433	1.51433	5.93719	3.17259	1.51433	0.884923	7.74627	5.54823	7.11263	2.27898	4.39323	4.30864	3.555	3.31904	5.84197	5.19587	2.99277	4.30864	0.884923	7.4638
52	TCGA.AA.A029.01	52.6667	0	I	2.58175	4.15543	4.15543	3.08916	4.38174	5.95031	6.10999	5.45132	6.19876	3.46902	7.5531	3.85931	4.38174	4.51791	4.15543	4.81387	5.86146	3.85931	5.06379	3.29033	5.25399	3.93389	5.45132	3.93389	4.92093	2.20581	0.499102	6.30049	3.70155	2.20581	2.20581	7.82608	5.39518	7.59061	2.58175	4.56234	4.95233	3.55868	3.99579	6.83002	5.58035	3.85931	4.61294	2.20581	7.7281
53	TCGA.AA.A02E.01	2.96667	1	II	3.29964	3.55582	2.63072	3.16242	4.34341	6.04701	5.70386	5.35567	5.98459	3.94798	7.29119	3.43207	4.03386	5.03972	4.11797	4.77012	6.32445	3.77012	4.52815	3.00959	5.31566	3.87316	5.5137	3.77012	5.03972	2.42044	1.53107	6.53957	4.11797	1.88753	1.88753	7.51196	5.67995	7.22007	3.29964	3.94798	4.1943	3.29964	3.77012	5.6009	4.11797	3.16242	4.1943	1.53107	6.84172
54	TCGA.AA.A02H.01	2.03333	1	I	2.62605	3.99398	4.68706	3.43118	4.46858	5.23955	5.42021	5.42021	5.4974	3.43118	7.74627	3.89885	4.8125	4.52815	4.72828	5.27327	6.09311	3.75061	4.8125	3.555	5.31759	3.43118	5.31759	3.89885	4.52815	2.82103	1.8101	6.47768	5.23955	3.30354	1.8101	8.50372	6.24793	7.37045	2.99699	3.89885	4.68706	3.555	3.66069	5.69339	5.27327	3.89885	4.46858	2.38773	6.56377
55	TCGA.AA.A02J.01	5.1	1	I	3.73913	3.73913	4.59016	2.86856	3.86262	5.9902	5.61255	5.57289	6.29652	3.08859	7.62858	3.27699	4.39415	4.22677	4.59016	4.88818	5.9902	4.666	5.369	2.30354	5.32577	3.08859	5.9902	3.86262	4.31566	2.86856	1.27103	6.29652	3.44139	2.61038	2.61038	8.2113	5.64193	7.80645	3.08859	4.94658	5.19587	4.31566	4.22677	5.87693	5.25399	3.73913	4.73335	2.86856	7.44609
56	TCGA.AA.A02O.01	0.933333	0	I	3.1088	3.4991	4.16939	3.88134	3.37666	5.6452	5.69766	4.98944	5.91377	3.70413	7.7281	3.4991	4.16939	4.89433	5.18824	4.62624	5.77329	3.88134	4.53688	3.1088	5.22317	3.37666	6.08958	3.60011	4.81079	1.54267	2.16135	6.56377	4.2301	0.559084	1.54267	8.35126	6.2062	8.00441	2.80598	3.70413	5.04323	4.37016	3.88134	6.2292	5.18824	3.60011	4.67901	2.40781	7.66567
57	TCGA.AA.A02R.01	22.3333	1	II	2.54267	4.13011	4.13011	3.22856	4.67845	5.30597	5.39689	5.18692	5.68734	2.69674	7.66567	3.10545	5.33795	3.80047	4.40054	4.8413	5.30597	3.10545	4.25248	2.69674	5.2854	2.54267	5.0048	3.33342	4.76199	1.80185	1.80185	6.15839	3.72356	2.33151	1.38589	7.99303	5.87431	7.35062	2.54267	3.54267	4.32241	3.33342	3.87774	6.031	5.46565	3.10545	4.25248	0.739848	7.4638
58	TCGA.AA.A02Y.01	40.5	0	I	2.7754	3.71736	3.28442	3.38313	4.22497	5.77329	6.04701	5.44162	6.20268	3.6427	7.92013	3.94798	4.74308	4.22497	4.70007	5.22162	5.81113	3.28442	4.46858	3.38313	5.37202	3.79978	5.37202	3.28442	4.9168	3.38313	1.83458	6.52982	4.08179	2.29474	2.29474	7.64775	5.31759	7.56224	2.47508	4.35755	4.70007	3.38313	3.6427	6.07632	4.74308	3.38313	4.08179	1.57854	6.95358
59	TCGA.AA.A03F.01	18.2667	1	II	2.13969	4.03504	3.75275	3.40916	3.96471	5.76217	5.96617	5.27327	6.0066	3.05601	7.69718	3.89659	4.98732	4.4103	4.65115	4.8475	5.69135	3.19745	4.8475	2.7556	5.37712	4.08859	5.52335	3.89659	4.8475	2.13969	1.19745	6.38595	3.96471	2.3914	1.19745	8.01569	6.17719	7.43716	2.59375	4.15002	4.8475	4.21387	4.03504	6.40429	4.69933	3.666	4.36574	2.13969	7.5531
60	TCGA.AA.A03J.01	41.5	0	I	3.30646	3.81421	4.33056	3.99518	4.33056	6.54941	6.34044	5.88972	6.39014	3.81421	8.04974	3.18798	5.26541	5.33151	5.06982	5.13011	5.95838	3.89466	5.8189	3.71882	5.77935	4.54514	6.13545	3.81421	5.4027	2.77259	1.59455	6.54941	4.24489	2.6009	2.6009	7.68622	5.49228	7.59061	2.926	4.4467	4.89142	3.71882	3.71882	5.44747	5.17353	4.08378	4.73154	3.42537	6.25896
61	TCGA.AF.2691.01	10.7667	0	I	4.17259	4.07952	4.51895	2.76553	4.07952	5.95327	5.65916	5.39689	5.85133	4.17259	7.89793	3.02266	4.95233	5.28676	4.07952	5.35567	6.38595	4.59773	6.32054	3.22239	5.82443	4.07952	6.08958	3.71516	4.89918	3.02266	2.11548	6.70846	4.72447	3.22239	2.46989	7.48527	6.43084	8.10052	2.76553	4.89918	5.11991	4.17259	3.40871	4.72447	5.01421	4.51895	4.59773	2.11548	7.08002
62	TCGA.AF.2692.01	13.7333	0	I	3.04206	3.55582	3.90432	3.65	4.22136	5.85375	5.80219	5.33593	5.85375	3.47422	7.89793	3.7481	4.54679	4.58816	5.0003	5.0003	5.91121	3.65	4.04789	3.04206	5.37978	4.04789	5.74739	3.39598	5.30755	2.90175	2.58496	6.70846	3.8285	2.40781	2.19954	7.37045	5.71918	7.59061	3.15597	3.90432	4.50377	3.39598	3.7481	6.44012	4.854	3.55582	4.77312	0.948601	6.88939
63	TCGA.AF.3400.01	12.9	0	II	1.11326	3.2342	3.56072	2.79701	3.91775	5.14323	5.0003	4.89627	5.39894	1.7852	7.52288	3.80941	5.88671	4.26253	3.56072	3.91775	5.66751	3.80941	4.09986	1.11326	4.89627	2.79701	5.31759	3.56072	3.40871	2.20789	1.11326	5.74273	3.2342	1.11326	2.20789	6.81001	5.66751	7.35062	2.20789	4.01851	4.40054	2.79701	3.69005	5.59106	4.83458	3.2342	4.26253	1.7852	7.57132
64	TCGA.AF.3913.01	10.5333	1	II	3.61078	3.88199	4.28787	3.42403	3.70782	5.67346	5.65916	5.36013	5.84197	2.92726	7.44609	2.76553	5.01257	5.0441	4.45308	5.0441	5.88166	4.337	4.39003	2.58175	5.36013	4.10713	5.46771	4.03445	5.0441	2.37295	2.76553	6.4446	3.88199	2.92726	1.40418	7.74627	6.36749	7.26297	1.80735	4.39003	4.60802	3.88199	3.31228	6.73597	5.36013	3.70782	4.666	2.11326	7.12983
65	TCGA.AG.3574.01	1	0	II	2.35238	3.05658	3.48457	3.38174	3.88817	5.92275	5.59106	5.39346	6.14568	2.09761	7.84871	1.80735	3.69228	5.37051	5.26354	4.64	5.66353	1.80735	4.26178	1.80735	5.26354	3.05658	5.0048	3.95544	4.43429	2.93231	1.80735	6.19482	3.48457	2.35238	2.76553	8.29413	6.32445	7.47457	3.38174	4.37967	4.86823	4.02798	4.26178	6.84854	5.53128	3.59733	4.10769	1.41864	8.26541
66	TCGA.AG.3580.01	0	0	I	2.81831	4.26404	3.94205	3.42044	3.42044	5.7945	5.75346	5.67582	6.26535	3.65	7.99303	3.02562	5.11464	5.30366	5.3579	5.3339	5.67582	4.26404	5.11464	2.81831	5.39163	3.42044	5.73136	3.75275	5.06824	2.81831	2.38589	6.61471	3.94205	2.38589	2.12873	8.46961	6.91898	7.7688	3.02562	4.52398	5.37202	3.42044	3.94205	6.55449	5.23955	4.26404	4.99337	1.81421	7.08736
67	TCGA.AG.3584.01	0	0	I	1.68407	4.03621	4.44073	3.45505	4.03621	5.70598	5.66553	5.02399	5.90633	4.11214	7.70805	4.11214	4.7572	4.17473	5.18349	5.06379	5.87693	3.57168	5.3762	3.67506	5.24159	4.38221	5.72574	4.44073	5.56234	2.66827	1.68407	6.68986	4.24489	3.04556	2.66827	7.53372	6.12963	7.06286	3.31904	4.55131	5.10922	3.85732	3.94798	6.01659	4.24489	3.31904	4.44073	2.66827	7.37045
68	TCGA.AG.3593.01	1	0	I	2.36737	3.73227	4.4121	3.50547	3.91009	5.71342	5.75346	5.15218	5.75346	3.50547	7.7688	3.8285	5.0489	5.00988	4.86295	4.71333	5.68538	3.91009	4.90384	3.09085	5.21801	4.4121	5.62945	3.91009	4.86295	3.91009	2.11103	6.52982	4.26953	2.59296	2.11103	8.03771	6.35426	7.38796	2.78381	3.37016	4.62449	3.50547	3.50547	5.77698	4.21387	3.73227	4.90384	0.776806	7.1921
69	TCGA.AG.3594.01	1.03333	0	I	2.37944	4.05774	3.65459	3.06062	4.05774	5.57733	5.78764	5.0825	5.92489	3.38313	7.78821	4.33533	5.6151	4.52105	4.26704	4.99699	5.67346	2.7556	4.64847	3.28392	5.12571	4.05774	5.43207	3.65459	5.02872	2.57208	1.55254	6.28491	3.73697	2.7556	2.7556	7.94459	5.6452	7.4638	3.28392	4.46858	4.70081	3.82443	3.65459	6.06242	4.99699	3.38313	4.80512	1.55254	7.48527
70	TCGA.AG.4007.01	1.03333	0	I	3.07382	3.7481	3.87447	3.07382	3.7481	5.4714	5.26354	5.11464	5.68267	3.98793	8.06167	4.09311	5.06379	4.72701	5.06379	5.11464	5.9447	4.18692	4.72701	2.63537	5.29597	4.26779	5.6199	4.09311	5.21607	2.35802	2.87447	6.32054	4.50716	2.87447	0	7.7688	6.14866	7.33169	4.18692	3.7481	4.34908	3.7481	3.46031	5.26354	4.6565	3.6198	4.72701	2.35802	7.22834
71	TCGA.AG.A002.01	21.2333	0	I	2.89012	4.05079	3.43696	3.71736	3.27699	5.91377	5.71113	5.60999	5.88419	3.09649	7.35062	2.35238	5.13079	4.76765	4.82443	4.55254	5.84858	3.71736	4.87349	2.63072	5.21607	3.43696	5.48349	3.71736	4.92948	1.98793	0	6.40826	3.94735	2.63072	2.63072	8.08813	6.58406	7.48527	3.09649	4.42582	4.82443	3.27699	3.71736	6.14568	5.17619	4.15812	4.34908	1.98793	7.37045
72	TCGA.AG.A008.01	14.1	0	I	3.47725	4.03504	4.41594	3.47725	3.58296	5.59375	5.32409	5.4334	5.90865	3.85433	7.94459	4.03504	4.33438	5.03328	5.47346	5.19587	6.09311	4.41594	4.89918	2.76553	5.22317	4.26853	5.74739	3.85433	4.99337	2.93105	1.73408	6.38595	3.09085	2.34388	2.76553	8.26541	5.78171	7.78821	2.76553	4.72192	5.22317	3.85433	3.94298	6.32841	5.29401	4.26853	4.6624	2.76553	6.99194
73	TCGA.AG.A00C.01	6.1	0	I	2.91775	2.91775	4.20242	3.97269	3.54473	6.10685	5.95582	5.43929	5.86435	4.08859	8.13761	2.91775	4.92093	4.78851	4.85566	4.72701	6.02842	4.08859	5.22959	2.66751	5.488	4.31179	5.68267	3.54473	5.16444	2.91775	2.03092	6.26535	4.6565	2.66751	2.66751	7.8862	6.06946	7.64775	3.97269	3.54473	4.6565	3.70192	3.54473	5.59375	5.3852	3.97269	4.56173	2.38221	6.86806
74	TCGA.AG.A00H.01	26.3	0	I	3.28442	3.28442	2.80185	2.97942	3.53812	5.71571	5.50186	4.99548	5.97858	2.11548	7.60856	3.6477	6.17019	5.1049	4.68107	4.85233	5.50186	3.28442	4.13477	2.11548	4.99548	3.40871	5.26878	3.73372	3.90143	1.38957	2.11548	6.09311	3.28442	2.60565	2.38589	8.1128	6.26535	7.47457	2.38589	3.98063	4.43585	3.98063	4.06091	6.04701	5.15812	3.40871	4.20006	1.38957	7.16658
75	TCGA.AG.A00Y.01	23.3333	0	I	3.06465	3.72683	3.94298	3.64923	4.43118	6.0066	5.82731	5.11686	6.36749	4.10769	7.31076	3.64923	5.20581	4.83559	4.02385	5.06278	6.19876	3.55745	5.06278	3.18375	5.22651	4.33342	5.65592	3.80941	4.79788	2.93105	2.08746	6.58901	4.02385	2.488	2.28983	7.97074	5.95327	7.23656	2.79632	4.33342	4.43118	3.38313	3.88101	5.74488	4.83559	3.06465	4.58536	2.08746	7.40565
76	TCGA.AG.A011.01	17.2667	0	I	2.08179	3.67092	3.7747	3.56153	4.05079	5.63324	5.50186	5.42021	5.72137	3.43029	8.16306	3.67092	5.55755	4.71516	5.14486	4.98641	5.42021	4.05079	4.7572	1.74846	5.28934	3.67092	5.31904	2.97331	4.89142	3.29768	2.08179	6.3364	4.22805	2.97331	1.3296	7.62858	6.17719	7.47457	3.15164	4.31058	4.82001	3.87742	3.43029	5.72137	5.50186	3.67092	4.22805	2.35426	6.76801
77	TCGA.AG.A014.01	16.1333	0	I	2.86658	3.97269	4.03504	3.00839	3.90497	5.85881	5.60763	5.28219	5.96871	2.86658	8.23844	4.29106	5.51854	5.12322	5.22007	5.03592	5.86946	4.03504	5.69339	1.83188	5.51854	3.8285	5.51854	3.45154	4.72828	2.11437	1.83188	6.54941	3.90497	3.00839	2.70487	7.64775	5.72137	7.59061	2.70487	4.68706	4.9994	3.64693	3.64693	5.77935	5.30134	3.64693	3.8285	2.70487	6.65344
78	TCGA.AG.A015.01	13.2	0	II	2.96101	4.12516	3.81558	3.59296	4.24691	5.89659	5.98185	5.3875	5.91377	3.81558	7.74627	4.29817	4.61019	4.87349	4.97591	5.14037	5.74739	3.20268	4.19325	3.08859	5.60229	3.88101	5.57511	4.19325	5.14037	2.29474	1.8101	6.74147	3.93703	2.49057	2.07952	8.1128	5.72964	7.39683	2.6477	4.34625	4.77821	3.66978	4.05514	6.28873	4.70616	3.51728	3.99216	1.8101	6.83002
79	TCGA.AG.A016.01	1.03333	0	I	3.68032	3.52732	3.68032	3.34436	3.9684	6.35426	6.01941	5.37712	6.05875	3.34436	7.89793	2.64155	4.2162	4.55193	5.04323	4.90977	6.01941	3.68032	5.09114	3.52732	5.26878	4.47768	5.64712	3.52732	5.18137	3.34436	1.98793	6.60526	3.34436	2.64155	0.782409	7.51196	6.09311	7.36057	1.98793	3.9684	4.68407	4.3147	3.34436	5.64712	5.54009	3.68032	4.75382	1.98793	6.82282
80	TCGA.AG.A01J.01	1.03333	0	II	2.64155	3.58416	3.58416	2.81831	3.48199	5.6009	5.34293	4.94408	5.71745	2.17419	7.35062	3.66524	4.94408	4.41278	4.82816	4.47075	5.48575	2.17419	3.66524	2.64155	4.98641	2.17419	4.90384	3.13641	4.29817	1.84532	0.799087	6.0066	3.27798	2.64155	0.799087	7.87439	5.83727	6.9836	2.43652	3.72683	4.52314	3.72683	3.72683	5.94735	5.24159	2.64155	3.88362	1.45066	7.00727
81	TCGA.AG.A01L.01	12.1667	0	I	3.28787	3.41774	3.75061	3.14731	2.99277	5.64712	5.30597	5.25336	5.70386	3.14731	7.37045	3.85931	4.83255	4.83255	4.77012	4.83255	5.98459	3.53439	4.11214	2.12763	5.10028	4.11214	5.73335	3.64309	4.41594	2.12763	1.80735	6.19482	3.41774	2.60565	0.742725	7.92013	5.75987	7.14758	2.81147	3.85931	4.54514	3.64309	3.95853	5.84858	5.2127	3.41774	4.18534	2.39506	7.42816
82	TCGA.AG.A01N.01	12.1667	0	I	2.44978	3.7438	3.7438	4.29425	3.38543	5.5158	5.5158	4.94267	5.76677	4.37597	6.95358	4.03504	5.37712	4.69246	4.76129	5.13805	6.14866	4.76129	4.82934	3.07153	5.6199	4.37597	5.79952	3.84465	6.14866	3.53149	1.47508	6.52982	4.37597	3.65076	2.17419	7.5531	5.37712	6.72474	3.65076	4.62838	4.51012	3.23879	4.37597	4.82934	3.65076	2.69079	4.03504	3.07153	7.33169
83	TCGA.AG.A01W.01	71	0	I	2.65535	4.12157	4.32241	2.91265	4.12157	5.76217	5.67788	5.49367	5.86435	3.65	8.33732	3.49953	5.25336	5.02104	5.15435	4.86096	5.93719	3.89756	5.80219	2.39872	5.58035	3.77891	5.37202	3.77891	4.46684	2.91265	0.948601	6.69655	4.46684	2.39872	2.39872	7.92013	6.05572	7.61861	3.12763	4.32241	5.05947	3.49953	2.65535	5.96617	5.10028	4.00809	4.46684	2.91265	6.61471
84	TCGA.AG.A01Y.01	64.8667	0	II	3.24387	2.84264	3.97728	3.06178	3.87709	5.25701	5.46052	5.11576	5.60763	2.59852	7.05506	2.32	5.32912	4.06752	4.61745	4.79286	5.42984	2.84264	3.87709	1.31808	5.28934	2.59852	4.79286	2.59852	3.87709	1.31808	1.91584	5.60763	2.59852	0	2.59852	6.96189	5.52628	7.00727	2.32	4.06752	4.3067	3.64846	3.87709	5.60763	5.35567	3.24387	3.64846	0	6.67976
85	TCGA.AG.A020.01	11.1333	0	I	3.42313	3.72064	4.8702	3.42313	3.94735	5.76217	5.63324	5.40099	5.72137	4.13422	7.78821	3.26554	4.33342	4.8702	5.56428	4.8702	6.02842	4.43118	5.88972	2.90046	5.29057	3.42313	5.93436	3.09311	5.19587	2.40781	1.0048	6.54941	3.26554	2.90046	0	8.01569	6.54941	7.82608	3.26554	3.57612	4.92093	3.72064	3.42313	6.4489	5.66751	4.43118	4.80512	2.65688	7.34119
86	TCGA.AG.A026.01	1.96667	1	I	3.55582	4.33295	4.488	3.45066	3.23981	5.73534	5.66931	5.2854	5.84197	3.82443	7.59061	4.27401	4.70413	5.0346	4.8702	4.8702	6.031	3.72937	5.46358	3.65	4.99548	4.27401	5.36772	3.91393	5.21904	3.45066	1.48199	6.86171	4.8702	3.3505	2.67205	8.29413	5.7945	7.78821	2.99277	4.38405	4.93058	4.33295	2.67205	6.29652	5.21904	4.06695	5.06523	2.99277	6.83002
87	TCGA.AG.A02N.01	62.8	0	I	2.73263	4.44604	4.854	3.7845	4.03504	5.47854	5.34436	5.08548	5.6009	3.94673	8.01569	4.2891	5.02872	4.57168	4.80512	4.94767	5.8189	4.50589	5.54823	3.29033	5.31373	4.80512	5.86724	3.66865	5.64712	2.73263	0.754175	6.46869	3.55541	1.45066	3.55541	7.56224	6.09972	7.74627	2.9386	3.66865	4.57168	4.1235	4.37597	5.9985	5.38244	4.44604	4.37597	2.9386	6.75261
88	TCGA.AG.A02X.01	41.5333	0	I	3.37109	3.90721	4.3147	2.55418	4.80924	5.66353	5.06824	5.56621	5.3898	3.75061	7.7281	3.55745	3.90721	4.61824	4.87348	4.71772	6.07282	4.19088	4.80924	2.55418	5.0048	3.15164	5.60763	3.55745	5.0048	3.37109	2.1021	6.21361	4.05687	3.55745	0	7.83744	5.66353	7.4638	2.55418	4.3147	4.05687	4.05687	3.90721	6.10685	5.32829	3.75061	4.43028	2.1021	7.36057
89	TCGA.AG.A032.01	38.5333	0	I	2.30159	4.43585	4.18322	3.17206	4.26554	5.47552	5.65249	5.27749	5.67582	3.00959	7.88621	4.11103	5.27749	4.97591	4.93483	5.11284	5.90633	4.35379	4.56417	3.32385	5.61657	4.4974	5.43929	4.03151	4.89239	3.00959	0.946107	6.465	4.73751	3.17206	2.30159	7.68622	6.37446	7.60856	3.58256	3.70524	4.4974	3.70524	3.70524	5.7945	5.02503	3.47162	4.84566	1.9855	6.60999
90	TCGA.AG.A036.01	73.0667	0	I	2.79077	3.02975	3.02975	3.81694	3.67582	5.83727	5.63691	5.15381	5.88419	3.54019	7.62858	3.21361	4.94767	4.5319	4.5319	4.66107	5.6997	3.37944	4.19797	2.55254	5.10126	3.67582	5.32829	3.67582	5.15381	2.25197	1.90561	6.28873	3.37944	3.02975	0.742725	7.2714	5.80452	7.01428	3.37944	3.92663	4.6017	3.81694	3.37944	5.55582	4.9994	3.54019	4.0048	1.90561	6.70846
[truncated: 138 more columns]

## Sheet: Table S1c
								Gene	pvalue	fdr_BH	fdr	fcSR	mean CI	mean CII	fcSR2	median CI	median CII	type
								ABCF1	0.0493272	0.0655489	0.0655489	-0.222886	3.14773	2.92484	-0.218314	3.21641	2.9981	2014 CPTAC CRC
								ACIN1	0.00266041	0.0047456	0.0047456	-0.30814	3.96709	3.65895	-0.237246	3.978	3.74076	2014 CPTAC CRC
								ALYREF	0.00185804	0.00347067	0.00347067	-0.429834	4.17417	3.74434	-0.305492	4.24393	3.93843	2014 CPTAC CRC
								APOBEC3C	0.00143734	0.00272355	0.00272355	0.248197	0.0856823	0.333879	0	0	0	2014 CPTAC CRC
								AQR	0.294041	0.336532	0.336532	-0.248599	0.683819	0.43522	-0.61502	0.61502	0	2014 CPTAC CRC
								BUB3	0.000733149	0.00152804	0.00152804	-0.328809	3.65805	3.32924	-0.26939	3.63838	3.36899	2014 CPTAC CRC
								C14orf166	0.884836	0.893865	0.893865	-0.0478693	3.95823	3.91036	-0.002839	4.00568	4.00284	2014 CPTAC CRC
								CCT3	0.00210572	0.00389656	0.00389656	-0.189231	6.03255	5.84332	-0.14169	6.03075	5.88906	2014 CPTAC CRC
								CCT4	0.00216481	0.00396882	0.00396882	-0.149351	5.89972	5.75037	-0.166959	5.92438	5.75742	2014 CPTAC CRC
								CCT6A	0.00251919	0.00453454	0.00453454	-0.176888	5.55121	5.37432	-0.166116	5.56313	5.39701	2014 CPTAC CRC
								CCT8	0.000863956	0.00176354	0.00176354	-0.198961	6.17239	5.97343	-0.173404	6.14996	5.97656	2014 CPTAC CRC
								CDC5L	4.07641e-08	3.93502e-07	3.93502e-07	-0.689799	3.85381	3.16402	-0.616813	3.82996	3.21314	2014 CPTAC CRC
								CLTC	0.000261564	0.00061806	0.00061806	-0.237219	7.98972	7.7525	-0.202971	8.00754	7.80457	2014 CPTAC CRC
								CMAS	0.2432	0.284932	0.284932	-0.15773	3.77496	3.61723	-0.019053	3.85221	3.83316	2014 CPTAC CRC
								CORO1A	0.675963	0.711919	0.711919	0.0424146	5.08795	5.13037	-0.02582	5.17792	5.1521	2014 CPTAC CRC
								DARS	0.0144539	0.0218464	0.0218464	-0.229441	4.96696	4.73752	-0.220016	4.99667	4.77666	2014 CPTAC CRC
								DDB1	0.00386978	0.00649336	0.00649336	-0.30029	5.06093	4.76064	-0.321158	5.1083	4.78715	2014 CPTAC CRC
								DDX1	0.161868	0.195426	0.195426	-0.142912	5.06047	4.91756	-0.110979	5.12232	5.01135	2014 CPTAC CRC
								DDX17	1.14948e-08	1.75074e-07	1.75074e-07	-0.323215	6.10233	5.77912	-0.277434	6.10632	5.82889	2014 CPTAC CRC
								DDX18	2.87408e-07	1.81745e-06	1.81745e-06	-0.703299	4.06472	3.36142	-0.627868	4.0776	3.44973	2014 CPTAC CRC
								DDX21	3.36482e-11	6.66234e-09	6.66234e-09	-1.05158	5.18321	4.13163	-0.844639	5.08254	4.2379	2014 CPTAC CRC
								DDX23	3.49768e-06	1.64891e-05	1.64891e-05	-0.642879	3.16098	2.5181	-0.562106	3.25669	2.69459	2014 CPTAC CRC
								DDX3X	0.000500366	0.00108871	0.00108871	-0.183949	5.53591	5.35196	-0.151568	5.54063	5.38906	2014 CPTAC CRC
								DDX41	0.00295502	0.00519534	0.00519534	-0.422437	0.610906	0.188469	-0.569696	0.569696	0	2014 CPTAC CRC
								DDX46	2.15315e-08	2.66453e-07	2.66453e-07	-0.773153	4.15444	3.38129	-0.754787	4.2375	3.48271	2014 CPTAC CRC
								DDX5	8.17972e-10	4.26814e-08	4.26814e-08	-0.437988	5.81884	5.38085	-0.348921	5.79099	5.44207	2014 CPTAC CRC
								DDX6	0.238228	0.280769	0.280769	-0.0949444	3.9157	3.82075	-0.09783	3.93099	3.83316	2014 CPTAC CRC
								DHX15	5.75935e-07	3.16764e-06	3.16764e-06	-0.508294	5.19561	4.68732	-0.563349	5.16655	4.6032	2014 CPTAC CRC
								DHX30	2.33689e-06	1.15676e-05	1.15676e-05	-0.806558	3.04769	2.24113	-0.709829	3.05585	2.34602	2014 CPTAC CRC
								DHX36	0.152121	0.185926	0.185926	-0.171722	1.86351	1.69179	-0.209923	2.01511	1.80518	2014 CPTAC CRC
								DHX9	1.43983e-07	1.05588e-06	1.05588e-06	-0.342713	6.66188	6.31916	-0.311692	6.68022	6.36853	2014 CPTAC CRC
								DKC1	0.0211602	0.031035	0.031035	-0.300914	3.98534	3.68442	-0.313323	4.06314	3.74982	2014 CPTAC CRC
								DNAJA3	0.0101706	0.0157327	0.0157327	-0.468439	2.77574	2.3073	-0.249154	2.80083	2.55168	2014 CPTAC CRC
								DNMT1	0.0107831	0.0164236	0.0164236	-0.352717	2.34644	1.99372	-0.495232	2.562	2.06677	2014 CPTAC CRC
								EEF1A1	0.173224	0.207868	0.207868	-0.135947	8.12288	7.98693	-0.077001	8.13605	8.05905	2014 CPTAC CRC
								EEF1G	0.0897364	0.113171	0.113171	-0.145677	6.21818	6.0725	-0.248309	6.26974	6.02143	2014 CPTAC CRC
								EEF2	2.51357e-05	8.02721e-05	8.02721e-05	-0.278159	7.73958	7.46142	-0.240687	7.71966	7.47897	2014 CPTAC CRC
								EIF2AK2	2.91729e-05	8.75188e-05	8.75188e-05	-0.425873	3.24605	2.82018	-0.498806	3.25987	2.76106	2014 CPTAC CRC
								EIF2S1	0.000876977	0.00177185	0.00177185	-0.23999	4.3901	4.15011	-0.338921	4.49017	4.15124	2014 CPTAC CRC
								EIF2S3	6.21121e-06	2.50984e-05	2.50984e-05	-0.338411	4.93869	4.60028	-0.441053	4.98233	4.54128	2014 CPTAC CRC
								EIF3D	0.0221055	0.0319481	0.0319481	-0.173779	3.96489	3.79111	-0.172889	4.00284	3.82996	2014 CPTAC CRC
								EIF3F	0.731236	0.762024	0.762024	-0.0180605	3.98664	3.96858	-0.1073	4.05905	3.95174	2014 CPTAC CRC
								EIF4A1	0.768884	0.792912	0.792912	0.0513019	6.21439	6.26569	0.003492	6.24833	6.25182	2014 CPTAC CRC
								EIF5A	0.622385	0.66612	0.66612	-0.0159555	5.26162	5.24567	-0.021987	5.34752	5.32553	2014 CPTAC CRC
								EIF5B	0.000262207	0.00061806	0.00061806	-0.372823	3.85726	3.48443	-0.481903	3.91346	3.43155	2014 CPTAC CRC
								ELAVL1	5.75874e-05	0.000160596	0.000160596	-0.357268	4.72924	4.37197	-0.396927	4.76665	4.36972	2014 CPTAC CRC
								EMG1	1.25668e-07	9.57008e-07	9.57008e-07	-0.942001	2.51908	1.57707	-0.827497	2.55685	1.72935	2014 CPTAC CRC
								ENO1	0.845757	0.867668	0.867668	0.0577796	7.41608	7.47386	-0.106311	7.51275	7.40644	2014 CPTAC CRC
								EZR	0.192357	0.229438	0.229438	0.137484	5.95209	6.08957	0.00259	6.01017	6.01276	2014 CPTAC CRC
								FAM98A	0.00429592	0.00708827	0.00708827	-0.41854	2.19361	1.77507	-0.63743	2.36678	1.72935	2014 CPTAC CRC
								FBL	0.000778406	0.00160546	0.00160546	-0.28588	4.78862	4.50274	-0.264907	4.86842	4.60351	2014 CPTAC CRC
								FIP1L1	0.000696013	0.00146607	0.00146607	-0.653229	1.73522	1.08199	-0.404114	1.69224	1.28813	2014 CPTAC CRC
								FRG1	2.87555e-05	8.75188e-05	8.75188e-05	-0.614623	0.770562	0.155939	-0.889576	0.889576	0	2014 CPTAC CRC
								FUS	0.251659	0.291394	0.291394	-0.0985779	4.28293	4.18436	-0.077895	4.28735	4.20945	2014 CPTAC CRC
								FXR1	0.0585802	0.0763084	0.0763084	-0.399712	1.95833	1.55862	-0.330362	2.0226	1.69224	2014 CPTAC CRC
								G3BP2	0.276418	0.318202	0.318202	0.115483	2.8904	3.00588	0.266605	2.82354	3.09014	2014 CPTAC CRC
								GNB2L1	0.0282726	0.0397019	0.0397019	-0.155315	6.16152	6.0062	-0.165276	6.17309	6.00781	2014 CPTAC CRC
								GNL3	0.000327918	0.000746296	0.000746296	-0.564593	2.74697	2.18238	-0.384788	2.7633	2.37851	2014 CPTAC CRC
								GTPBP4	3.29947e-08	3.43839e-07	3.43839e-07	-1.08023	3.36376	2.28353	-0.868894	3.25032	2.38143	2014 CPTAC CRC
								HEATR1	1.08505e-05	3.71062e-05	3.71062e-05	-0.755324	3.64143	2.88611	-0.658014	3.65896	3.00095	2014 CPTAC CRC
								HIST1H1B	0.00101658	0.0019929	0.0019929	-0.324093	6.1258	5.80171	-0.282574	6.12025	5.83768	2014 CPTAC CRC
								HNRNPA0	0.92417	0.928862	0.928862	0.019136	4.00601	4.02514	0.083405	3.96833	4.05174	2014 CPTAC CRC
								HNRNPA1	0.0631483	0.0817213	0.0817213	-0.255299	6.67175	6.41645	-0.292354	6.6475	6.35514	2014 CPTAC CRC
								HNRNPA2B1	0.0323869	0.0445321	0.0445321	-0.21831	6.87008	6.65177	-0.240811	6.85746	6.61665	2014 CPTAC CRC
								HNRNPA3	0.875039	0.893081	0.893081	0.0133202	5.88789	5.90121	-0.01549	5.94498	5.92949	2014 CPTAC CRC
								HNRNPAB	0.000234163	0.000572399	0.000572399	-0.29512	5.01471	4.71959	-0.27907	5.01698	4.73791	2014 CPTAC CRC
								HNRNPC	5.09842e-06	2.1031e-05	2.1031e-05	-0.278992	6.31196	6.03297	-0.277179	6.25927	5.98209	2014 CPTAC CRC
								HNRNPH1	0.00308688	0.00536143	0.00536143	-0.190453	5.85048	5.66003	-0.138407	5.83768	5.69927	2014 CPTAC CRC
								HNRNPK	5.26676e-07	2.97948e-06	2.97948e-06	-0.357704	7.07627	6.71857	-0.344033	7.07867	6.73464	2014 CPTAC CRC
								HNRNPL	0.328723	0.371927	0.371927	-0.0685006	5.91705	5.84855	-0.025585	5.9041	5.87852	2014 CPTAC CRC
								HNRNPM	0.424451	0.466896	0.466896	-0.0763546	6.30415	6.2278	-0.118831	6.30282	6.18399	2014 CPTAC CRC
								HNRNPU	1.09523e-07	9.03565e-07	9.03565e-07	-0.347581	6.9098	6.56222	-0.275219	6.89673	6.62151	2014 CPTAC CRC
								HNRNPUL1	0.654914	0.697166	0.697166	-0.097992	3.39663	3.29863	-0.08772	3.46769	3.37997	2014 CPTAC CRC
								HNRNPUL2	0.0772137	0.0986343	0.0986343	-0.116379	5.01451	4.89813	-0.163879	5.03308	4.8692	2014 CPTAC CRC
								HSP90AB1	7.90537e-09	1.43667e-07	1.43667e-07	-0.537178	8.38143	7.84425	-0.444092	8.30978	7.86568	2014 CPTAC CRC
								IGF2BP1	0.109194	0.135127	0.135127	0.173863	1.7034	1.87727	0.392062	1.50161	1.89367	2014 CPTAC CRC
								IGF2BP3	0.993396	0.993396	0.993396	0.0507652	1.92902	1.97978	-0.11442	1.84377	1.72935	2014 CPTAC CRC
								ILF2	1.14965e-07	9.10525e-07	9.10525e-07	-0.38831	5.69926	5.31095	-0.37665	5.7054	5.32875	2014 CPTAC CRC
								ILF3	0.000349405	0.000777327	0.000777327	-0.245414	6.08245	5.83703	-0.211664	6.07592	5.86425	2014 CPTAC CRC
								KPNB1	0.00521399	0.00853198	0.00853198	-0.156916	5.85744	5.70053	-0.142883	5.87852	5.73564	2014 CPTAC CRC
								LARP1	1.3649e-05	4.58051e-05	4.58051e-05	-0.699561	3.50477	2.80521	-0.529797	3.55427	3.02447	2014 CPTAC CRC
								LARS	3.27773e-07	1.9088e-06	1.9088e-06	-0.453783	4.82037	4.36659	-0.454784	4.88598	4.4312	2014 CPTAC CRC
								LBR	1.04633e-05	3.71062e-05	3.71062e-05	-0.642193	3.92847	3.28627	-0.592546	4.00568	3.41314	2014 CPTAC CRC
								LYAR	0.000566125	0.0012053	0.0012053	-0.691962	1.79645	1.10449	-0.763765	1.77887	1.01511	2014 CPTAC CRC
								MAP4	0.105641	0.131553	0.131553	-0.255404	4.85226	4.59685	-0.118607	4.84509	4.72649	2014 CPTAC CRC
								MATR3	6.73795e-05	0.000182755	0.000182755	-0.307644	5.64787	5.34023	-0.369662	5.71251	5.34285	2014 CPTAC CRC
								MCM3	7.98151e-09	1.43667e-07	1.43667e-07	-1.16868	4.0052	2.83651	-1.16169	4.16358	3.0019	2014 CPTAC CRC
								MCM5	7.9857e-08	7.18713e-07	7.18713e-07	-1.16603	4.00338	2.83735	-0.900768	4.06223	3.16146	2014 CPTAC CRC
								MKI67	4.02022e-09	9.95005e-08	9.95005e-08	-1.75403	2.72438	0.970349	-2.01314	2.80083	0.787696	2014 CPTAC CRC
								MOV10	0.0217454	0.0316587	0.0316587	-0.543925	1.83176	1.28783	-0.887927	1.91798	1.03006	2014 CPTAC CRC
								MYBBP1A	1.72982e-09	5.70842e-08	5.70842e-08	-0.830477	4.59697	3.76649	-0.760009	4.59316	3.83316	2014 CPTAC CRC
								MYH9	0.884485	0.893865	0.893865	-0.0460494	9.2856	9.23955	0	9.22138	9.22138	2014 CPTAC CRC
								MYO1C	0.000338588	0.000761823	0.000761823	0.328009	5.4094	5.73741	0.329259	5.38325	5.71251	2014 CPTAC CRC
								NAT10	2.02144e-05	6.56139e-05	6.56139e-05	-0.756363	3.69585	2.93949	-0.62887	3.71901	3.09014	2014 CPTAC CRC
								NCL	1.02561e-07	8.82918e-07	8.82918e-07	-0.464385	6.46154	5.99715	-0.372329	6.39575	6.02342	2014 CPTAC CRC
								NCOA5	0.0298031	0.0415564	0.0415564	-0.365533	1.49619	1.13065	-0.513195	1.65415	1.14095	2014 CPTAC CRC
								NKRF	0.000310213	0.000714211	0.000714211	-0.56161	0.564613	0.00300358	0	0	0	2014 CPTAC CRC
								NOC4L	2.66505e-05	8.37586e-05	8.37586e-05	-0.754021	1.22577	0.471747	-1.12928	1.14439	0.0151069	2014 CPTAC CRC
								NOL6	2.16866e-10	2.14697e-08	2.14697e-08	-1.30131	2.74675	1.44544	-1.11182	2.78989	1.67807	2014 CPTAC CRC
								NONO	0.214416	0.254218	0.254218	-0.131431	5.1891	5.05767	-0.136758	5.19626	5.0595	2014 CPTAC CRC
								NOP2	8.6225e-10	4.26814e-08	4.26814e-08	-0.974842	3.93344	2.9586	-0.974465	3.99239	3.01792	2014 CPTAC CRC
								NOP56	4.90646e-06	2.06698e-05	2.06698e-05	-0.350138	5.02385	4.67371	-0.340511	4.98952	4.64901	2014 CPTAC CRC
								NOP58	0.00912922	0.0143459	0.0143459	-0.188979	4.43641	4.24743	-0.185178	4.51694	4.33177	2014 CPTAC CRC
								NPM1	0.0718301	0.092353	0.092353	-0.226294	5.76627	5.53997	-0.260184	5.79099	5.53081	2014 CPTAC CRC
								NPM3	0.660841	0.699714	0.699714	-0.0717955	1.36896	1.29717	-0.229482	1.51761	1.28813	2014 CPTAC CRC
								PA2G4	0.00100179	0.00198355	0.00198355	-0.32651	5.3482	5.02169	-0.306099	5.36697	5.06087	2014 CPTAC CRC
								PABPC1	0.000477849	0.00105127	0.00105127	-0.252039	5.79216	5.54012	-0.24858	5.78921	5.54063	2014 CPTAC CRC
								PABPC4	0.000163218	0.000419704	0.000419704	-0.2602	4.57014	4.30994	-0.256077	4.54226	4.28618	2014 CPTAC CRC
								PARP1	0.000219394	0.000549874	0.000549874	-0.386364	5.4259	5.03954	-0.317227	5.34752	5.03029	2014 CPTAC CRC
								PCBP1	0.310622	0.353466	0.353466	-0.136481	5.91943	5.78295	-0.0866	5.85116	5.76456	2014 CPTAC CRC
								PCBP2	0.0814536	0.103383	0.103383	-0.132185	5.28273	5.15054	-0.221352	5.36917	5.14782	2014 CPTAC CRC
								PDCD11	7.23187e-09	1.43667e-07	1.43667e-07	-0.977865	3.96037	2.9825	-1.13414	4.02167	2.88753	2014 CPTAC CRC
								PFN1	0.456211	0.499059	0.499059	0.0558525	7.43487	7.49072	0.034177	7.45286	7.48704	2014 CPTAC CRC
								PGAM5	2.40861e-07	1.70323e-06	1.70323e-06	-0.993009	3.07269	2.07968	-0.846956	3.12885	2.28189	2014 CPTAC CRC
								PHGDH	0.417279	0.461571	0.461571	-0.120813	3.67504	3.55422	-0.50187	4.00616	3.50429	2014 CPTAC CRC
								PLEC	0.248088	0.288949	0.288949	-0.140135	8.65765	8.51752	-0.136598	8.67633	8.53973	2014 CPTAC CRC
								PLRG1	0.00117635	0.0022835	0.0022835	-0.441522	2.11142	1.6699	-0.551354	2.22943	1.67807	2014 CPTAC CRC
								POP1	0.0037875	0.00646148	0.00646148	-0.580189	1.15079	0.570604	-0.970253	1.01511	0.0448542	2014 CPTAC CRC
								PPP2R1A	0.400842	0.445881	0.445881	0.065838	5.78485	5.85068	0.02875	5.82635	5.8551	2014 CPTAC CRC
								PRDX1	0.334907	0.37677	0.37677	-0.0559411	6.68212	6.62618	-0.022342	6.63899	6.61665	2014 CPTAC CRC
								PRKDC	2.47285e-08	2.72013e-07	2.72013e-07	-0.594459	7.66785	7.07339	-0.635416	7.7066	7.07118	2014 CPTAC CRC
								PRPF19	0.0358913	0.0490102	0.0490102	-0.250617	4.62631	4.37569	-0.126674	4.59505	4.46838	2014 CPTAC CRC
								PRPF3	2.14572e-08	2.66453e-07	2.66453e-07	-0.986316	2.2064	1.22008	-0.758027	2.27563	1.51761	2014 CPTAC CRC
								PRPF4	2.11015e-06	1.07131e-05	1.07131e-05	-0.602109	3.12305	2.52094	-0.466106	3.16655	2.70044	2014 CPTAC CRC
								PRPF40A	8.46055e-06	3.16074e-05	3.16074e-05	-0.529449	3.01764	2.48819	-0.512364	2.97318	2.46081	2014 CPTAC CRC
								PRPF8	4.17351e-08	3.93502e-07	3.93502e-07	-0.70263	5.71672	5.01409	-0.479853	5.68355	5.2037	2014 CPTAC CRC
								PSIP1	0.0483784	0.0647224	0.0647224	-0.439793	2.57986	2.14006	-0.471505	2.79647	2.32496	2014 CPTAC CRC
								PTBP1	0.00251909	0.00453454	0.00453454	-0.279228	6.10588	5.82665	-0.254496	6.0437	5.78921	2014 CPTAC CRC
								PWP1	0.489478	0.529599	0.529599	-0.16657	0.314041	0.147471	0	0	0	2014 CPTAC CRC
								PWP2	0.000916154	0.00183231	0.00183231	-0.569194	2.17718	1.60799	-0.413851	2.09192	1.67807	2014 CPTAC CRC
								RAB7A	0.00923901	0.0144041	0.0144041	-0.228308	5.11951	4.8912	-0.159752	5.08075	4.92099	2014 CPTAC CRC
								RAC2	0.00663164	0.0106753	0.0106753	0.222069	4.30158	4.52365	0.17313	4.32041	4.49354	2014 CPTAC CRC
								RALY	2.9373e-07	1.81745e-06	1.81745e-06	-0.532334	4.62407	4.09173	-0.490573	4.6341	4.14353	2014 CPTAC CRC
								RARS	2.93565e-07	1.81745e-06	1.81745e-06	-0.333418	5.47302	5.13961	-0.225939	5.48084	5.2549	2014 CPTAC CRC
								RBBP4	0.353934	0.395927	0.395927	-0.120775	3.54018	3.41941	-0.116105	3.59882	3.48271	2014 CPTAC CRC
								RBBP6	0.142195	0.174874	0.174874	-0.242134	0.34306	0.100926	0	0	0	2014 CPTAC CRC
								RBM14	7.99401e-06	3.10356e-05	3.10356e-05	-0.441368	4.45808	4.01672	-0.388948	4.50996	4.12101	2014 CPTAC CRC
								RBM15	0.0320063	0.0443164	0.0443164	-0.477325	1.8497	1.37237	-0.490748	1.77887	1.28812	2014 CPTAC CRC
								RBM25	0.0401064	0.0540209	0.0540209	-0.27244	2.71176	2.43932	-0.185951	2.7633	2.57735	2014 CPTAC CRC
								RBM39	8.15137e-06	3.10379e-05	3.10379e-05	-0.37468	4.26673	3.89205	-0.363358	4.26974	3.90638	2014 CPTAC CRC
								RBM4	0.0225904	0.0321791	0.0321791	-0.340465	2.17174	1.83128	-0.418117	2.30359	1.88547	2014 CPTAC CRC
								RBMX	0.000549213	0.001182	0.001182	-0.352323	5.39373	5.0414	-0.363292	5.49388	5.13058	2014 CPTAC CRC
								RCC2	1.55739e-05	5.13938e-05	5.13938e-05	-0.546449	4.40977	3.86332	-0.433094	4.49623	4.06314	2014 CPTAC CRC
								RNASEH2A	3.24022e-05	9.57558e-05	9.57558e-05	-0.681713	0.819577	0.137864	-0.822462	0.822462	0	2014 CPTAC CRC
								RNASEH2B	0.00144431	0.00272355	0.00272355	-0.509696	0.728285	0.218589	-0.813849	0.813849	0	2014 CPTAC CRC
								RNASEH2C	0.762454	0.790398	0.790398	-0.0699173	1.29432	1.22441	-0.0517619	1.25669	1.20493	2014 CPTAC CRC
								RUVBL2	1.08695e-05	3.71062e-05	3.71062e-05	-0.299142	4.80313	4.50399	-0.333627	4.82514	4.49152	2014 CPTAC CRC
								SAFB	8.80417e-06	3.22819e-05	3.22819e-05	-0.481639	3.77421	3.29257	-0.368356	3.73734	3.36899	2014 CPTAC CRC
								SART1	2.68948e-07	1.81745e-06	1.81745e-06	-0.85642	3.13216	2.27574	-0.948329	3.25192	2.30359	2014 CPTAC CRC
								SART3	3.64114e-06	1.67662e-05	1.67662e-05	-0.609765	3.69353	3.08376	-0.575239	3.63838	3.06314	2014 CPTAC CRC
								SERBP1	0.00296502	0.00519534	0.00519534	-0.381483	4.89511	4.51362	-0.41311	4.97704	4.56393	2014 CPTAC CRC
								SFPQ	0.0177247	0.0263872	0.0263872	-0.153924	5.62549	5.47156	-0.226449	5.66152	5.43507	2014 CPTAC CRC
								SKIV2L2	4.62355e-06	2.03436e-05	2.03436e-05	-0.644226	3.41656	2.77234	-0.562594	3.47454	2.91194	2014 CPTAC CRC
								SLC25A5	0.00027482	0.000640169	0.000640169	-0.31896	6.96294	6.64399	-0.29251	6.98988	6.69737	2014 CPTAC CRC
								SMARCA4	3.20602e-07	1.9088e-06	1.9088e-06	-0.867971	2.92302	2.05505	-0.743925	3.00379	2.25987	2014 CPTAC CRC
								SMARCA5	3.26123e-09	9.22462e-08	9.22462e-08	-0.760932	4.2216	3.46067	-0.629407	4.25431	3.6249	2014 CPTAC CRC
								SND1	5.27169e-05	0.000149114	0.000149114	-0.25729	5.9987	5.74141	-0.242103	5.97945	5.73735	2014 CPTAC CRC
								SNRNP200	9.4704e-09	1.56262e-07	1.56262e-07	-0.526228	5.64238	5.11616	-0.472797	5.63807	5.16528	2014 CPTAC CRC
								SNRPD1	0.700333	0.733683	0.733683	0.110591	3.23995	3.35055	-0.137367	3.4759	3.33854	2014 CPTAC CRC
								SNRPD2	0.0527718	0.0696587	0.0696587	-0.23895	3.74656	3.50761	-0.166715	3.82568	3.65896	2014 CPTAC CRC
								SNW1	0.0223358	0.032047	0.032047	-0.550325	1.96195	1.41163	-0.186622	1.91597	1.72935	2014 CPTAC CRC
								SON	0.00798511	0.0126484	0.0126484	-0.369151	2.96027	2.59112	-0.347394	2.96736	2.61997	2014 CPTAC CRC
								SRP14	0.00688401	0.0109922	0.0109922	-0.252152	3.57947	3.32732	-0.306011	3.58243	3.27642	2014 CPTAC CRC
								SRPK1	4.8517e-06	2.06698e-05	2.06698e-05	-1.21456	2.50234	1.28778	-1.47303	2.48814	1.01511	2014 CPTAC CRC
								SRRM2	7.10156e-05	0.000190015	0.000190015	-0.52092	4.47	3.94908	-0.405265	4.55394	4.14868	2014 CPTAC CRC
								SRSF1	0.0251661	0.0355921	0.0355921	-0.304533	4.78862	4.48409	-0.417283	5.08075	4.66346	2014 CPTAC CRC
								SRSF7	0.474033	0.515706	0.515706	-0.0295708	4.08923	4.05966	-0.136391	4.14868	4.01229	2014 CPTAC CRC
								SSRP1	2.86531e-05	8.75188e-05	8.75188e-05	-0.493836	4.09322	3.59939	-0.436232	4.074	3.63777	2014 CPTAC CRC
								STAU1	7.25792e-06	2.87414e-05	2.87414e-05	-0.78348	3.28673	2.50325	-0.734514	3.36678	2.63227	2014 CPTAC CRC
								STRAP	0.0175291	0.0262936	0.0262936	-0.213505	4.44012	4.22662	-0.244237	4.49017	4.24593	2014 CPTAC CRC
								SUPT16H	4.18821e-06	1.88469e-05	1.88469e-05	-0.426577	4.45894	4.03237	-0.480706	4.46975	3.98904	2014 CPTAC CRC
								SYNCRIP	6.17564e-05	0.00016983	0.00016983	-0.276971	5.87738	5.60041	-0.240901	5.85313	5.61223	2014 CPTAC CRC
								TAF15	0.00381815	0.00646148	0.00646148	-0.242306	3.34018	3.09787	-0.24321	3.32799	3.08478	2014 CPTAC CRC
								TARS	0.0189532	0.0280055	0.0280055	-0.275986	4.41852	4.14253	-0.177793	4.38725	4.20945	2014 CPTAC CRC
								TBL3	1.36764e-06	7.12612e-06	7.12612e-06	-1.02999	2.67858	1.64859	-1.10852	2.7866	1.67807	2014 CPTAC CRC
								TCOF1	0.0104175	0.0159896	0.0159896	-0.610017	3.35369	2.74367	-0.594504	3.37559	2.78108	2014 CPTAC CRC
								TCP1	3.68782e-05	0.000107381	0.000107381	-0.258063	6.12636	5.8683	-0.225045	6.10356	5.87852	2014 CPTAC CRC
								THRAP3	0.00392086	0.00652378	0.00652378	-0.410003	3.94133	3.53132	-0.258805	3.94634	3.68753	2014 CPTAC CRC
								TOP1	2.42655e-08	2.72013e-07	2.72013e-07	-0.695941	4.85592	4.15998	-0.572428	4.82514	4.25272	2014 CPTAC CRC
								TSR1	0.157695	0.191555	0.191555	-0.322475	1.65092	1.32844	-0.133724	1.68281	1.54909	2014 CPTAC CRC
								U2AF1	0.526625	0.566694	0.566694	-0.063345	3.53212	3.46877	-0.139441	3.55685	3.41741	2014 CPTAC CRC
								U2AF2	0.0543104	0.071215	0.071215	-0.201614	4.21634	4.01473	-0.090093	4.23104	4.14095	2014 CPTAC CRC
								U2SURP	1.08595e-05	3.71062e-05	3.71062e-05	-0.50365	3.20795	2.7043	-0.575194	3.27563	2.70044	2014 CPTAC CRC
								UHRF1	0.000226396	0.00056033	0.00056033	-0.681232	1.02917	0.347939	-0.984733	0.984733	0	2014 CPTAC CRC
								UPF1	2.48289e-06	1.19905e-05	1.19905e-05	-0.412349	4.73439	4.32204	-0.398824	4.78825	4.38942	2014 CPTAC CRC
								USP10	0.00339034	0.00583728	0.00583728	-0.386935	3.04143	2.65449	-0.394532	3.1008	2.70627	2014 CPTAC CRC
								UTP14A	1.13455e-09	4.49281e-08	4.49281e-08	-1.11329	2.01578	0.902488	-1.09954	2.09192	0.992387	2014 CPTAC CRC
								VARS	0.00124694	0.00239703	0.00239703	-0.30961	5.59937	5.28976	-0.322937	5.61223	5.28929	2014 CPTAC CRC
								VDAC2	0.00615089	0.00998259	0.00998259	-0.220592	6.28128	6.06069	-0.160832	6.23911	6.07828	2014 CPTAC CRC
								WDR3	1.04564e-06	5.59558e-06	5.59558e-06	-0.877852	1.26757	0.389716	-1.30666	1.30666	0	2014 CPTAC CRC
								WDR36	1.29543e-08	1.83211e-07	1.83211e-07	-1.22411	3.04501	1.8209	-1.08946	3.1008	2.01134	2014 CPTAC CRC
								XRN2	0.000245738	0.000593367	0.000593367	-0.552184	3.65323	3.10105	-0.419225	3.73507	3.31584	2014 CPTAC CRC
								YBX1	0.0366286	0.0496744	0.0496744	-0.272533	4.0156	3.74307	-0.558674	4.17245	3.61378	2014 CPTAC CRC
								ZC3H11A	3.9888e-05	0.000114461	0.000114461	-0.697334	1.8768	1.17946	-0.477897	1.85641	1.37851	2014 CPTAC CRC
								ZC3H15	0.00018934	0.000480633	0.000480633	-0.5236	2.84906	2.32546	-0.661688	2.98665	2.32496	2014 CPTAC CRC
								ZC3HAV1	9.04404e-05	0.000235621	0.000235621	-0.491492	3.54311	3.05162	-0.65776	3.65776	3	2014 CPTAC CRC
								ZFR	8.15666e-05	0.000215336	0.000215336	-0.622772	2.82782	2.20505	-0.45138	2.81816	2.36678	2014 CPTAC CRC
								ZNF207	0.0986925	0.123678	0.123678	-0.247968	2.7809	2.53293	-0.0804723	2.84377	2.7633	2014 CPTAC CRC
								ABCF1	0.485839	0.599202	0.599202	-0.0379375	3.15042	3.06865	-0.0405075	3.14905	3.06186	2019 CPTAC-CRC Label free
								ACIN1	0.00194065	0.00690425	0.00690425	-0.144261	4.02921	3.6458	-0.115181	4.0707	3.75834	2019 CPTAC-CRC Label free
								ALYREF	0.000994994	0.0041835	0.0041835	-0.25012	3.77943	3.17785	-0.216739	3.79976	3.26972	2019 CPTAC-CRC Label free
								AQR	0.0136667	0.0320042	0.0320042	-0.343899	2.31559	1.82447	-0.241328	2.51123	2.12441	2019 CPTAC-CRC Label free
								BUB3	0.253538	0.355337	0.355337	0.0405519	3.50755	3.60755	0.0881915	3.43913	3.65593	2019 CPTAC-CRC Label free
								C14orf166	0.144122	0.216769	0.216769	0.0677845	4.29133	4.49777	0.0329698	4.3365	4.43675	2019 CPTAC-CRC Label free
								CCT3	0.946798	0.968406	0.968406	-0.00230192	5.50439	5.49562	0.00379768	5.50114	5.51564	2019 CPTAC-CRC Label free
								CCT4	0.87627	0.938713	0.938713	0.00257541	5.78442	5.79475	-0.00255166	5.74779	5.73763	2019 CPTAC-CRC Label free
								CCT6A	0.32046	0.429602	0.429602	-0.0146384	5.57357	5.5173	-0.0427835	5.62531	5.46094	2019 CPTAC-CRC Label free
								CCT8	0.538301	0.655168	0.655168	-0.0107034	5.67422	5.63227	-0.00547113	5.6001	5.5789	2019 CPTAC-CRC Label free
								CDC5L	8.25134e-05	0.000587114	0.000587114	-0.23563	4.18922	3.55796	-0.167742	4.21513	3.75246	2019 CPTAC-CRC Label free
								CLTC	0.772461	0.850627	0.850627	-0.00203527	7.85263	7.84156	-0.000496133	7.86426	7.86156	2019 CPTAC-CRC Label free
								CMAS	0.952702	0.968406	0.968406	0.0178764	3.5502	3.59447	-0.0269034	3.71849	3.64979	2019 CPTAC-CRC Label free
								CORO1A	0.614141	0.71909	0.71909	0.00258023	5.50586	5.51571	0.0236231	5.51344	5.60447	2019 CPTAC-CRC Label free
								DARS	0.710851	0.811774	0.811774	-0.0120242	4.97334	4.93206	-0.00535257	4.95106	4.93273	2019 CPTAC-CRC Label free
								DDB1	0.0129995	0.0312326	0.0312326	-0.0590744	5.2725	5.06097	-0.0600421	5.27286	5.05792	2019 CPTAC-CRC Label free
								DDX1	0.733061	0.821917	0.821917	0.0120758	5.35114	5.39612	-0.00219726	5.39469	5.38648	2019 CPTAC-CRC Label free
								DDX17	0.0422031	0.084865	0.084865	-0.047599	5.10302	4.9374	-0.0404475	5.07952	4.93909	2019 CPTAC-CRC Label free
								DDX18	1.64965e-05	0.000217538	0.000217538	-0.218726	3.98786	3.42687	-0.195041	3.9919	3.48712	2019 CPTAC-CRC Label free
								DDX21	4.50608e-10	8.33625e-08	8.33625e-08	-0.23467	5.21421	4.43145	-0.208858	5.23941	4.53325	2019 CPTAC-CRC Label free
								DDX23	0.000703101	0.00325184	0.00325184	-0.398538	3.07844	2.33539	-0.196366	3.18027	2.77557	2019 CPTAC-CRC Label free
								DDX3X	0.887972	0.938713	0.938713	-0.0010814	4.21664	4.21348	0.0556931	4.09063	4.25163	2019 CPTAC-CRC Label free
								DDX46	0.0276625	0.0581541	0.0581541	-0.119888	3.89699	3.58624	-0.103602	3.93218	3.6597	2019 CPTAC-CRC Label free
								DDX5	0.000112078	0.000740512	0.000740512	-0.103967	5.14083	4.7834	-0.0988405	5.1345	4.79451	2019 CPTAC-CRC Label free
								DDX6	0.533417	0.653524	0.653524	-0.0212876	4.09043	4.03051	-0.0403671	4.15602	4.04134	2019 CPTAC-CRC Label free
								DHX15	0.000256944	0.00139808	0.00139808	-0.131381	4.93188	4.5026	-0.0997435	4.88873	4.56216	2019 CPTAC-CRC Label free
								DHX30	0.106027	0.178318	0.178318	-0.125443	3.62843	3.32626	-0.0621836	3.67917	3.52396	2019 CPTAC-CRC Label free
								DHX36	0.135077	0.208168	0.208168	-0.280482	2.0434	1.68236	-0.28972	2.13807	1.74907	2019 CPTAC-CRC Label free
								DHX9	0.00727541	0.0200888	0.0200888	-0.0509102	6.67349	6.4421	-0.0382688	6.69101	6.51586	2019 CPTAC-CRC Label free
								DKC1	0.00867372	0.0226005	0.0226005	-0.104551	4.38457	4.07806	-0.121073	4.48769	4.12645	2019 CPTAC-CRC Label free
								DNAJA3	0.00555465	0.0160564	0.0160564	-0.345392	2.77951	2.18774	-0.337707	3.01244	2.38374	2019 CPTAC-CRC Label free
								DNMT1	5.15574e-05	0.000381525	0.000381525	-0.63671	2.37612	1.52827	-0.539009	2.34418	1.61336	2019 CPTAC-CRC Label free
								EEF1A1	0.823981	0.90199	0.90199	-0.00106251	6.72736	6.7224	0.0082836	6.64557	6.68384	2019 CPTAC-CRC Label free
								EEF1G	0.397984	0.529691	0.529691	-0.025575	6.27735	6.16705	0.0199183	6.10915	6.19408	2019 CPTAC-CRC Label free
								EEF2	0.0207087	0.0450718	0.0450718	-0.0438438	7.87019	7.63461	-0.0366333	7.82357	7.62741	2019 CPTAC-CRC Label free
								EIF2AK2	0.543207	0.656819	0.656819	-0.00726034	3.97055	3.95062	-0.0463049	4.01609	3.88923	2019 CPTAC-CRC Label free
								EIF2S1	0.476607	0.59176	0.59176	-0.0205181	4.32813	4.26701	-0.0638022	4.34743	4.15936	2019 CPTAC-CRC Label free
								EIF2S3	0.174841	0.260851	0.260851	-0.0282634	5.15464	5.05464	-0.0487349	5.16076	4.98934	2019 CPTAC-CRC Label free
								EIF3D	0.00158593	0.00586796	0.00586796	-0.28002	3.39662	2.79738	-0.189701	3.4556	3.02983	2019 CPTAC-CRC Label free
								EIF3F	0.721927	0.814368	0.814368	0.0134398	3.79268	3.82818	0.0293179	3.80448	3.88259	2019 CPTAC-CRC Label free
								EIF4A1	0.988169	0.988169	0.988169	0.00229261	3.90183	3.90804	-0.0280169	3.88078	3.80614	2019 CPTAC-CRC Label free
								EIF5A	0.716381	0.813071	0.813071	0.0148598	5.4274	5.48359	-0.0048336	5.47927	5.46094	2019 CPTAC-CRC Label free
								EIF5B	2.01512e-05	0.000232999	0.000232999	-0.342124	3.4637	2.73244	-0.365612	3.58377	2.7815	2019 CPTAC-CRC Label free
								ELAVL1	0.126676	0.2003	0.2003	-0.0447843	4.13623	4.00981	-0.0413874	4.18052	4.06229	2019 CPTAC-CRC Label free
								EMG1	0.0315252	0.0648018	0.0648018	-0.384078	1.97167	1.51083	-0.360701	2.07288	1.61433	2019 CPTAC-CRC Label free
								ENO1	0.202219	0.299284	0.299284	0.0266066	7.21178	7.34602	0.0110324	7.18399	7.23913	2019 CPTAC-CRC Label free
								EZR	0.406313	0.536914	0.536914	-0.0288317	4.8512	4.75522	-0.0274377	4.87364	4.78183	2019 CPTAC-CRC Label free
								FAM98A	0.30974	0.41827	0.41827	0.17143	1.86365	2.09879	0.0561535	1.98086	2.05948	2019 CPTAC-CRC Label free
								FBL	0.256633	0.356971	0.356971	-0.0613319	4.71281	4.51666	-0.032115	4.69954	4.59608	2019 CPTAC-CRC Label free
								FIP1L1	0.0147146	0.0336075	0.0336075	-0.342861	2.5275	1.99288	-0.281116	2.61294	2.15033	2019 CPTAC-CRC Label free
								FUS	0.603761	0.711438	0.711438	-0.0254004	3.38111	3.32211	-0.00727179	3.24997	3.23363	2019 CPTAC-CRC Label free
								FXR1	0.677053	0.77798	0.77798	-0.153948	1.41336	1.27031	-0.0218537	1.54669	1.52344	2019 CPTAC-CRC Label free
								G3BP2	0.749868	0.835696	0.835696	-0.0264617	2.79698	2.74614	0.00113398	2.83854	2.84077	2019 CPTAC-CRC Label free
								GNL3	0.00113445	0.00456248	0.00456248	-0.222634	3.76521	3.22678	-0.144135	3.703	3.35093	2019 CPTAC-CRC Label free
								GTPBP4	2.30016e-05	0.000250311	0.000250311	-0.371932	3.28151	2.53578	-0.348611	3.33439	2.61863	2019 CPTAC-CRC Label free
								HEATR1	3.40437e-05	0.000330399	0.000330399	-0.310169	4.31027	3.47644	-0.279961	4.43372	3.65167	2019 CPTAC-CRC Label free
								HIST1H1B	0.117721	0.191038	0.191038	-0.0465501	6.41632	6.2126	-0.0307208	6.38852	6.25392	2019 CPTAC-CRC Label free
								HNRNPA0	0.218409	0.313222	0.313222	-0.0971737	4.12179	3.8533	-0.0510496	4.05382	3.91288	2019 CPTAC-CRC Label free
								HNRNPA1	9.05026e-05	0.00062011	0.00062011	-0.07892	6.33523	5.99798	-0.0831652	6.36145	6.00511	2019 CPTAC-CRC Label free
								HNRNPA2B1	0.0135509	0.0320042	0.0320042	-0.0494643	6.74321	6.51593	-0.0458983	6.72738	6.51672	2019 CPTAC-CRC Label free
								HNRNPA3	0.218409	0.313222	0.313222	-0.0342269	5.31712	5.19246	-0.0359879	5.33358	5.20218	2019 CPTAC-CRC Label free
								HNRNPAB	0.0232824	0.0500843	0.0500843	-0.0872727	4.696	4.42035	-0.118444	4.71651	4.34476	2019 CPTAC-CRC Label free
								HNRNPC	0.87627	0.938713	0.938713	-0.00289867	4.4804	4.47141	0.0050119	4.46405	4.47958	2019 CPTAC-CRC Label free
								HNRNPH1	0.0670519	0.124046	0.124046	-0.0805052	3.4586	3.27089	-0.0489204	3.48594	3.36971	2019 CPTAC-CRC Label free
								HNRNPK	0.212912	0.310147	0.310147	-0.0273919	7.17719	7.0422	-0.00826256	7.16747	7.12654	2019 CPTAC-CRC Label free
								HNRNPL	0.090941	0.158718	0.158718	-0.0489709	5.1535	4.98151	-0.0469589	5.22991	5.06242	2019 CPTAC-CRC Label free
								HNRNPM	0.0191339	0.0426479	0.0426479	-0.0518258	5.62368	5.42525	-0.0813582	5.64876	5.33902	2019 CPTAC-CRC Label free
								HNRNPU	0.00451606	0.0139245	0.0139245	-0.0572536	6.80136	6.53673	-0.0561136	6.79929	6.53991	2019 CPTAC-CRC Label free
								HNRNPUL1	0.0854121	0.150488	0.150488	-0.0539344	4.19413	4.04023	-0.0838206	4.2831	4.04134	2019 CPTAC-CRC Label free
								HNRNPUL2	0.10927	0.181596	0.181596	-0.0471421	4.74373	4.59123	-0.034812	4.69472	4.58279	2019 CPTAC-CRC Label free
								HSP90AB1	0.000215834	0.00124582	0.00124582	-0.063179	7.11795	6.81297	-0.0673114	7.06651	6.74438	2019 CPTAC-CRC Label free
								IGF2BP3	0.563969	0.673124	0.673124	0.231543	1.25059	1.46831	0.483136	1.03923	1.45262	2019 CPTAC-CRC Label free
								ILF2	0.583241	0.691664	0.691664	-0.0181376	5.52188	5.45289	-0.0143805	5.5791	5.52377	2019 CPTAC-CRC Label free
								ILF3	0.0122097	0.03035	0.03035	-0.0633134	5.68609	5.44195	-0.0517992	5.71727	5.51564	2019 CPTAC-CRC Label free
								KPNB1	0.431918	0.554895	0.554895	0.00747487	5.81795	5.84818	0.0208568	5.76966	5.85368	2019 CPTAC-CRC Label free
								LARP1	0.00273394	0.00919599	0.00919599	-0.376958	2.88513	2.22172	-0.373049	3.12299	2.41141	2019 CPTAC-CRC Label free
								LARS	0.123032	0.196216	0.196216	-0.0528725	4.89322	4.71714	-0.0521402	4.89783	4.72398	2019 CPTAC-CRC Label free
								LBR	0.23551	0.335149	0.335149	-0.065764	4.20552	4.01812	-0.0310392	4.20485	4.11535	2019 CPTAC-CRC Label free
								LYAR	0.000270007	0.00142718	0.00142718	-1.00714	1.48986	0.741249	-3.92473	1.60407	0.105624	2019 CPTAC-CRC Label free
								MAP4	0.0739633	0.134149	0.134149	0.0911708	4.52446	4.81961	0.104095	4.59655	4.94047	2019 CPTAC-CRC Label free
								MATR3	0.0596697	0.114989	0.114989	-0.0497248	5.84654	5.64846	-0.0305629	5.83156	5.70932	2019 CPTAC-CRC Label free
								MCM3	2.2418e-06	5.18415e-05	5.18415e-05	-0.278163	4.55224	3.75396	-0.280955	4.55923	3.75246	2019 CPTAC-CRC Label free
								MCM5	0.000804469	0.00354349	0.00354349	-0.349374	3.42791	2.69065	-0.293877	3.33611	2.72129	2019 CPTAC-CRC Label free
								MKI67	4.466e-06	8.26211e-05	8.26211e-05	-1.75745	1.87334	0.554079	#NAME?	1.79253	0	2019 CPTAC-CRC Label free
								MOV10	0.0349692	0.0710912	0.0710912	-0.426805	2.20373	1.63937	-0.429151	2.31158	1.7168	2019 CPTAC-CRC Label free
								MYBBP1A	3.76803e-08	2.32362e-06	2.32362e-06	-0.252714	4.97866	4.17867	-0.258645	4.96881	4.15329	2019 CPTAC-CRC Label free
								MYH9	0.0776314	0.138094	0.138094	-0.039738	9.35889	9.10462	-0.0162632	9.22684	9.12341	2019 CPTAC-CRC Label free
								MYO1C	1.76382e-05	0.000217538	0.000217538	0.123643	5.99085	6.52693	0.111257	6.0262	6.50932	2019 CPTAC-CRC Label free
								NAT10	2.92482e-08	2.32362e-06	2.32362e-06	-0.34585	4.37991	3.44631	-0.362731	4.5313	3.52396	2019 CPTAC-CRC Label free
								NCL	0.00242586	0.00831083	0.00831083	-0.0576829	7.21366	6.93093	-0.0531015	7.22795	6.96675	2019 CPTAC-CRC Label free
								NCOA5	0.0624417	0.11909	0.11909	-0.300426	1.93498	1.57123	-0.421984	2.1519	1.60617	2019 CPTAC-CRC Label free
								NOC4L	5.8869e-06	9.90069e-05	9.90069e-05	-0.563367	2.75055	1.86136	-0.529945	2.89423	2.00449	2019 CPTAC-CRC Label free
								NOL6	3.94987e-05	0.000332148	0.000332148	-0.632213	2.65305	1.71171	-0.326611	2.83361	2.25954	2019 CPTAC-CRC Label free
								NONO	0.102861	0.17458	0.17458	-0.0637327	4.14294	3.96391	-0.0576263	4.14327	3.98103	2019 CPTAC-CRC Label free
								NOP2	2.00866e-06	5.18415e-05	5.18415e-05	-0.381492	3.67649	2.82223	-0.297975	3.72492	3.02983	2019 CPTAC-CRC Label free
								NOP56	0.0292725	0.0608474	0.0608474	-0.0734867	4.68816	4.45534	-0.071751	4.7568	4.52601	2019 CPTAC-CRC Label free
								NOP58	0.00102155	0.0041997	0.0041997	-0.165447	3.92003	3.4953	-0.123087	3.9769	3.65167	2019 CPTAC-CRC Label free
								NPM1	0.247425	0.349417	0.349417	-0.0210871	5.50245	5.42261	-0.00937897	5.51164	5.47593	2019 CPTAC-CRC Label free
								PA2G4	0.00695907	0.0195065	0.0195065	-0.0608896	5.0238	4.81618	-0.0671168	4.99641	4.76929	2019 CPTAC-CRC Label free
								PABPC1	0.766794	0.849442	0.849442	-0.0139375	4.81905	4.77272	-0.0202428	4.86225	4.79451	2019 CPTAC-CRC Label free
								PABPC4	0.929105	0.965643	0.965643	0.0166844	2.79473	2.82724	0.0234099	2.87868	2.92578	2019 CPTAC-CRC Label free
								PARP1	0.000969081	0.0041693	0.0041693	-0.116636	5.55946	5.12769	-0.0940233	5.51164	5.16389	2019 CPTAC-CRC Label free
								PCBP1	0.940897	0.968406	0.968406	-0.00503427	5.42623	5.40733	0.00350563	5.4487	5.46195	2019 CPTAC-CRC Label free
								PCBP2	0.619361	0.72064	0.72064	0.0161955	4.23012	4.27788	0.0190332	4.28615	4.34307	2019 CPTAC-CRC Label free
								PDCD11	2.36929e-07	8.76636e-06	8.76636e-06	-0.409373	4.1922	3.15652	-0.284846	4.27301	3.50741	2019 CPTAC-CRC Label free
								PFN1	0.000180963	0.00111594	0.00111594	0.0825555	5.75924	6.09842	0.0884404	5.72975	6.09199	2019 CPTAC-CRC Label free
								PGAM5	0.563052	0.673124	0.673124	-0.0471512	2.90568	2.81225	-0.0430759	2.91482	2.82907	2019 CPTAC-CRC Label free
								PHGDH	0.309746	0.41827	0.41827	-0.0646533	3.80886	3.64194	-0.113811	3.94339	3.64426	2019 CPTAC-CRC Label free
								PLEC	0.882117	0.938713	0.938713	0.00504808	9.45256	9.48569	-0.00147967	9.42539	9.41572	2019 CPTAC-CRC Label free
								PLRG1	0.418169	0.548661	0.548661	-0.143649	1.70847	1.54655	-0.35308	1.99755	1.5639	2019 CPTAC-CRC Label free
								POP1	0.00368071	0.0116215	0.0116215	-0.760481	1.67767	0.990325	-1.8062	1.79253	0.512559	2019 CPTAC-CRC Label free
								PPP2R1A	0.472027	0.590034	0.590034	-0.00897905	4.69791	4.66876	-0.0229216	4.74303	4.66826	2019 CPTAC-CRC Label free
								PRDX1	0.110921	0.181596	0.181596	0.0447975	5.48086	5.65371	0.0411462	5.39799	5.55416	2019 CPTAC-CRC Label free
								PRKDC	0.000440804	0.00214602	0.00214602	-0.0744576	8.01779	7.61449	-0.0731302	7.95809	7.56475	2019 CPTAC-CRC Label free
								PRPF19	4.2694e-07	1.3164e-05	1.3164e-05	-0.191309	4.4723	3.91689	-0.157629	4.49741	4.03192	2019 CPTAC-CRC Label free
								PRPF3	0.00210499	0.00734762	0.00734762	-0.592898	1.99967	1.3258	-0.510167	2.23872	1.5719	2019 CPTAC-CRC Label free
								PRPF4	0.0052454	0.0154892	0.0154892	-0.350009	2.66857	2.09371	-0.243882	2.79985	2.36439	2019 CPTAC-CRC Label free
								PRPF40A	3.63072e-05	0.000330399	0.000330399	-0.408179	2.64287	1.99159	-0.471994	2.78028	2.00449	2019 CPTAC-CRC Label free
								PRPF8	2.68916e-06	5.52772e-05	5.52772e-05	-0.11847	6.29233	5.79627	-0.0901273	6.26124	5.88206	2019 CPTAC-CRC Label free
								PSIP1	0.0429595	0.085457	0.085457	-0.202358	2.77788	2.41433	-0.244116	2.93922	2.48168	2019 CPTAC-CRC Label free
								PTBP1	0.0670519	0.124046	0.124046	-0.0365049	6.26473	6.1082	-0.0277281	6.24817	6.12923	2019 CPTAC-CRC Label free
								PWP2	0.00119509	0.00470409	0.00470409	-0.326481	2.63425	2.10076	-0.170268	2.54259	2.25955	2019 CPTAC-CRC Label free
								RAB7A	0.136153	0.208168	0.208168	0.0418257	4.66861	4.80594	0.0550141	4.58437	4.76256	2019 CPTAC-CRC Label free
								RAC2	0.134215	0.208168	0.208168	0.106098	2.7818	2.99409	0.165356	2.78718	3.12567	2019 CPTAC-CRC Label free
								RALY	0.000222227	0.00124582	0.00124582	-0.145901	4.57504	4.13499	-0.127953	4.54511	4.15936	2019 CPTAC-CRC Label free
								RARS	0.436275	0.556627	0.556627	-0.00995117	5.53926	5.50118	-0.0171449	5.53583	5.47043	2019 CPTAC-CRC Label free
								RBBP4	0.00370631	0.0116215	0.0116215	-0.739689	1.47232	0.881728	-0.997705	1.49866	0.750525	2019 CPTAC-CRC Label free
								RBM14	0.0982528	0.169876	0.169876	-0.0644997	4.54712	4.3483	-0.0601922	4.57937	4.39224	2019 CPTAC-CRC Label free
								RBM15	0.012457	0.03035	0.03035	-0.598175	1.64681	1.08787	-0.400808	1.74811	1.32408	2019 CPTAC-CRC Label free
								RBM25	0.025635	0.0545112	0.0545112	-0.16428	3.02948	2.70343	-0.178606	3.197	2.82473	2019 CPTAC-CRC Label free
								RBM39	0.0638009	0.12044	0.12044	-0.0688992	3.81254	3.63474	-0.0897584	3.87989	3.64586	2019 CPTAC-CRC Label free
								RBMX	0.958608	0.969085	0.969085	-0.0139091	3.50893	3.47526	0.00272574	3.4535	3.46003	2019 CPTAC-CRC Label free
								RCC2	0.00030531	0.00152655	0.00152655	-0.178478	4.6101	4.07365	-0.174615	4.65737	4.12645	2019 CPTAC-CRC Label free
								RNASEH2A	0.00527468	0.0154892	0.0154892	-0.694914	1.43094	0.88396	-2.03421	1.65083	0.403037	2019 CPTAC-CRC Label free
								RTCB	0.982254	0.987593	0.987593	0.0225017	3.68684	3.74479	-0.00701316	3.77287	3.75458	2019 CPTAC-CRC Label free
								RUVBL2	0.0062216	0.0177076	0.0177076	-0.0926648	4.4176	4.14278	-0.124889	4.50643	4.13273	2019 CPTAC-CRC Label free
								SAFB	0.110921	0.181596	0.181596	-0.211579	2.68753	2.32093	-0.177242	2.75201	2.43386	2019 CPTAC-CRC Label free
								SART1	0.119466	0.192185	0.192185	-0.188815	2.4886	2.18331	-0.113663	2.61377	2.41575	2019 CPTAC-CRC Label free
								SART3	0.0739633	0.134149	0.134149	-0.0606025	4.02595	3.86034	-0.0948171	4.01364	3.75834	2019 CPTAC-CRC Label free
								SERBP1	0.0199077	0.0438444	0.0438444	-0.117423	4.75392	4.38232	-0.0513042	4.70923	4.54471	2019 CPTAC-CRC Label free
								SFPQ	0.207515	0.304685	0.304685	-0.0399365	5.29407	5.14953	-0.0608818	5.24952	5.0326	2019 CPTAC-CRC Label free
								SKIV2L2	0.00301948	0.00997506	0.00997506	-0.288496	3.27302	2.6798	-0.159844	3.38865	3.03326	2019 CPTAC-CRC Label free
								SLC25A5	0.467472	0.588315	0.588315	-0.0204876	4.59211	4.52736	-0.0286269	4.65556	4.56409	2019 CPTAC-CRC Label free
								SMARCA4	0.00134458	0.00507647	0.00507647	-0.879159	1.39545	0.758686	-1.54789	1.49866	0.512559	2019 CPTAC-CRC Label free
								SMARCA5	2.10302e-07	8.76636e-06	8.76636e-06	-0.336219	3.72596	2.95139	-0.309347	3.78584	3.0552	2019 CPTAC-CRC Label free
								SND1	0.00166853	0.00605252	0.00605252	-0.0441516	6.3812	6.18887	-0.054417	6.40318	6.16615	2019 CPTAC-CRC Label free
								SNRNP200	0.0141228	0.0326589	0.0326589	-0.0782711	5.96697	5.65187	-0.0542299	5.94968	5.73018	2019 CPTAC-CRC Label free
								SNRPD1	0.952702	0.968406	0.968406	-0.0179187	3.31217	3.27129	0.0188283	3.30748	3.35093	2019 CPTAC-CRC Label free
								SNRPD2	0.624599	0.722193	0.722193	0.02888	3.17275	3.2369	0.0398148	3.23724	3.32782	2019 CPTAC-CRC Label free
								SNW1	0.920249	0.961843	0.961843	-0.0333747	2.04666	1.99986	0.0139498	2.20458	2.226	2019 CPTAC-CRC Label free
								SON	0.000300962	0.00152655	0.00152655	-0.337852	3.20616	2.53677	-0.355468	3.09071	2.41575	2019 CPTAC-CRC Label free
								SRP14	0.893832	0.939539	0.939539	0.00416938	3.4854	3.49548	0.0190454	3.47458	3.52075	2019 CPTAC-CRC Label free
								SRPK1	5.14551e-05	0.000381525	0.000381525	-0.607183	2.5265	1.65859	-0.529986	2.61649	1.81208	2019 CPTAC-CRC Label free
								SRRM2	0.00905885	0.0232762	0.0232762	-0.208572	3.50657	3.03457	-0.18554	3.69718	3.25101	2019 CPTAC-CRC Label free
								SRSF1	0.00777414	0.0208437	0.0208437	-0.100046	4.74787	4.42978	-0.102003	4.74939	4.42519	2019 CPTAC-CRC Label free
								SRSF10	0.852949	0.928209	0.928209	0.00692296	2.78039	2.79377	0.00983186	2.80555	2.82473	2019 CPTAC-CRC Label free
								SRSF7	0.102861	0.17458	0.17458	-0.069397	4.00137	3.81345	-0.161619	4.11347	3.67753	2019 CPTAC-CRC Label free
								SSRP1	0.000119082	0.000759659	0.000759659	-0.232759	4.28806	3.64916	-0.187879	4.27569	3.75361	2019 CPTAC-CRC Label free
								STAU1	0.0034045	0.0110497	0.0110497	-0.305754	3.07487	2.48763	-0.382248	3.23455	2.48168	2019 CPTAC-CRC Label free
								STRAP	0.449496	0.569566	0.569566	0.0397301	3.55105	3.6502	0.0446072	3.5333	3.64426	2019 CPTAC-CRC Label free
								SUPT16H	0.00743837	0.0202367	0.0202367	-0.145167	4.31047	3.89785	-0.0793586	4.3365	4.10441	2019 CPTAC-CRC Label free
								SYNCRIP	0.144122	0.216769	0.216769	-0.03999	5.43747	5.28882	-0.0409076	5.43664	5.28465	2019 CPTAC-CRC Label free
								TAF15	0.431795	0.554895	0.554895	-0.095741	1.97256	1.84591	-0.150854	2.13974	1.9273	2019 CPTAC-CRC Label free
								TARS	0.423281	0.551458	0.551458	-0.0219961	4.57523	4.506	-0.0151429	4.61347	4.5653	2019 CPTAC-CRC Label free
								TBL3	6.54743e-06	0.00010094	0.00010094	-0.505545	3.05242	2.1501	-0.417124	3.09071	2.31468	2019 CPTAC-CRC Label free
								TCOF1	0.000738729	0.00333329	0.00333329	-0.494182	2.94494	2.0908	-0.394558	3.14845	2.39509	2019 CPTAC-CRC Label free
								TCP1	0.887972	0.938713	0.938713	-0.00241541	5.6882	5.67868	-0.0121091	5.72345	5.67561	2019 CPTAC-CRC Label free
								THRAP3	3.75048e-05	0.000330399	0.000330399	-0.255616	3.59383	3.0103	-0.237759	3.64272	3.08925	2019 CPTAC-CRC Label free
								TOP1	8.64457e-06	0.000123019	0.000123019	-0.208351	4.7487	4.11012	-0.190756	4.68498	4.10472	2019 CPTAC-CRC Label free
								TSR1	0.0168678	0.0380554	0.0380554	-0.485231	1.97812	1.41313	-0.361088	2.07344	1.61433	2019 CPTAC-CRC Label free
								U2AF2	0.00966521	0.024494	0.024494	-0.152998	3.95616	3.55809	-0.131729	4.03429	3.68224	2019 CPTAC-CRC Label free
								U2SURP	0.0005065	0.00240263	0.00240263	-0.205932	3.3273	2.8847	-0.189981	3.42696	3.00414	2019 CPTAC-CRC Label free
								UPF1	0.00812342	0.021469	0.021469	-0.0750539	5.19706	4.9336	-0.0781277	5.21983	4.94468	2019 CPTAC-CRC Label free
								USP10	0.000191915	0.0011453	0.0011453	-0.440853	3.09736	2.28182	-0.260206	3.15312	2.63276	2019 CPTAC-CRC Label free
								UTP14A	3.51602e-05	0.000330399	0.000330399	-0.488221	2.53025	1.80382	-0.515372	2.54525	1.78069	2019 CPTAC-CRC Label free
								VARS	0.272505	0.373432	0.373432	-0.0169934	5.77449	5.70687	-0.0201674	5.7801	5.69987	2019 CPTAC-CRC Label free
								VDAC2	0.130404	0.204446	0.204446	0.0332512	5.7393	5.87311	0.031597	5.70358	5.82987	2019 CPTAC-CRC Label free
								WDR3	0.00129087	0.00497525	0.00497525	-0.471823	2.48381	1.79096	-0.503506	2.54815	1.79744	2019 CPTAC-CRC Label free
								WDR36	4.26392e-05	0.000342967	0.000342967	-0.370985	3.0553	2.36252	-0.282546	3.03221	2.4929	2019 CPTAC-CRC Label free
								XRN2	0.0586724	0.114257	0.114257	-0.119752	3.95245	3.63763	-0.0546348	3.97644	3.82867	2019 CPTAC-CRC Label free
								YBX1	0.0477472	0.0939705	0.0939705	-0.231999	3.00279	2.55674	-0.165345	3.0196	2.69262	2019 CPTAC-CRC Label free
								ZC3H15	0.0763926	0.13721	0.13721	-0.121699	3.04743	2.80091	-0.0735227	3.1226	2.96745	2019 CPTAC-CRC Label free
								ZC3HAV1	0.0124681	0.03035	0.03035	-0.164448	3.4696	3.09582	-0.137293	3.43773	3.12567	2019 CPTAC-CRC Label free
								ZFR	0.00506875	0.0153724	0.0153724	-0.232812	2.67933	2.28004	-0.204207	2.7237	2.36422	2019 CPTAC-CRC Label free
								ZNF207	0.265992	0.367228	0.367228	-0.139929	2.08465	1.89195	-0.217541	2.24097	1.9273	2019 CPTAC-CRC Label free
								ABCF1	0.0433497	0.0578966	0.0578966	-0.0826228	0.161104	0.0784813	-0.1397	0.195	0.0553	2019 CPTAC-CRC_TMT
								ACIN1	0.00500364	0.00851046	0.00851046	-0.10065	0.201478	0.100827	-0.096	0.207	0.111	2019 CPTAC-CRC_TMT
								ALYREF	0.0892755	0.113158	0.113158	-0.0813009	0.170157	0.0888562	-0.0752	0.161	0.0858	2019 CPTAC-CRC_TMT
								APOBEC3C	0.550471	0.582679	0.582679	0.284115	-3.0505	-2.76638	1.835	-5.41	-3.575	2019 CPTAC-CRC_TMT
								AQR	0.000562725	0.00139978	0.00139978	-0.121818	0.161051	0.0392333	-0.12535	0.144	0.01865	2019 CPTAC-CRC_TMT
								BUB3	6.52142e-07	6.48881e-06	6.48881e-06	-0.181566	0.25842	0.0768542	-0.1831	0.247	0.0639	2019 CPTAC-CRC_TMT
								C14orf166	0.376753	0.409695	0.409695	0.0308172	0.0211245	0.0519417	0.02105	0.0498	0.07085	2019 CPTAC-CRC_TMT
								CCT3	0.00417601	0.00722631	0.00722631	-0.121629	0.185514	0.0638854	-0.1562	0.203	0.0468	2019 CPTAC-CRC_TMT
								CCT4	0.000505376	0.00127303	0.00127303	-0.146384	0.185863	0.0394792	-0.1764	0.219	0.0426	2019 CPTAC-CRC_TMT
								CCT6A	0.00312938	0.00561032	0.00561032	-0.124208	0.213039	0.0888313	-0.12895	0.213	0.08405	2019 CPTAC-CRC_TMT
								CCT8	8.796e-05	0.000324149	0.000324149	-0.143179	0.20832	0.0651417	-0.17275	0.237	0.06425	2019 CPTAC-CRC_TMT
								CDC5L	6.50293e-05	0.000264099	0.000264099	-0.157009	0.274163	0.117154	-0.2005	0.303	0.1025	2019 CPTAC-CRC_TMT
								CLTC	0.890957	0.904594	0.904594	-0.00403771	0.0649898	0.0609521	-0.02355	0.0641	0.04055	2019 CPTAC-CRC_TMT
								CMAS	0.272755	0.306657	0.306657	0.131605	-0.165241	-0.0336354	0.182	-0.209	-0.027	2019 CPTAC-CRC_TMT
								CORO1A	0.848363	0.865765	0.865765	-0.015641	0.0806327	0.0649917	-0.0093	0.0656	0.0563	2019 CPTAC-CRC_TMT
								DARS	0.18911	0.218796	0.218796	-0.0825786	0.209527	0.126948	-0.042	0.161	0.119	2019 CPTAC-CRC_TMT
								DDB1	0.0203539	0.029351	0.029351	-0.0892609	0.138576	0.0493146	-0.12215	0.144	0.02185	2019 CPTAC-CRC_TMT
								DDX1	0.899517	0.908649	0.908649	0.0150668	0.0615061	0.0765729	0.0143	0.0782	0.0925	2019 CPTAC-CRC_TMT
								DDX17	0.00151811	0.00305155	0.00305155	-0.10836	0.259633	0.151273	-0.109	0.247	0.138	2019 CPTAC-CRC_TMT
								DDX18	6.17083e-09	2.45599e-07	2.45599e-07	-0.381914	0.489235	0.107321	-0.349	0.469	0.12	2019 CPTAC-CRC_TMT
								DDX21	2.67446e-11	5.32218e-09	5.32218e-09	-0.479254	0.579504	0.10025	-0.4335	0.55	0.1165	2019 CPTAC-CRC_TMT
								DDX23	0.000175329	0.000553818	0.000553818	-0.136524	0.243749	0.107225	-0.126	0.242	0.116	2019 CPTAC-CRC_TMT
								DDX3X	0.000723707	0.00169433	0.00169433	-0.186348	0.272018	0.0856708	-0.1415	0.256	0.1145	2019 CPTAC-CRC_TMT
								DDX41	0.00191782	0.00377867	0.00377867	0.0468038	-0.0227163	0.0240875	-0.21965	0.242	0.02235	2019 CPTAC-CRC_TMT
								DDX46	1.90983e-05	9.74686e-05	9.74686e-05	-0.178076	0.274547	0.0964708	-0.1395	0.252	0.1125	2019 CPTAC-CRC_TMT
								DDX5	5.88073e-08	1.06388e-06	1.06388e-06	-0.352452	0.472814	0.120362	-0.337	0.453	0.116	2019 CPTAC-CRC_TMT
								DDX6	0.000100595	0.000345146	0.000345146	-0.148205	0.215465	0.0672604	-0.1516	0.215	0.0634	2019 CPTAC-CRC_TMT
								DHX15	8.09075e-06	5.55193e-05	5.55193e-05	-0.189022	0.300961	0.11194	-0.172	0.292	0.12	2019 CPTAC-CRC_TMT
								DHX30	1.29034e-05	7.90892e-05	7.90892e-05	-0.209718	0.244316	0.0345979	-0.19275	0.26	0.06725	2019 CPTAC-CRC_TMT
								DHX36	0.0183024	0.0267807	0.0267807	-0.111636	0.168771	0.0571354	-0.1394	0.185	0.0456	2019 CPTAC-CRC_TMT
								DHX9	8.7734e-07	8.31384e-06	8.31384e-06	-0.20059	0.3049	0.10431	-0.1885	0.302	0.1135	2019 CPTAC-CRC_TMT
								DKC1	0.0661517	0.0868085	0.0868085	-0.111287	0.28632	0.175033	-0.1065	0.26	0.1535	2019 CPTAC-CRC_TMT
								DNAJA3	0.0265013	0.0376697	0.0376697	-0.198705	0.211278	0.0125729	-0.16915	0.193	0.02385	2019 CPTAC-CRC_TMT
								DNMT1	2.00693e-07	2.8527e-06	2.8527e-06	-0.330017	0.373469	0.0434521	-0.2831	0.364	0.0809	2019 CPTAC-CRC_TMT
								EEF1A1	0.00219154	0.00423414	0.00423414	-0.17064	0.204898	0.0342583	-0.112	0.162	0.05	2019 CPTAC-CRC_TMT
								EEF1G	0.000492047	0.00127216	0.00127216	-0.183924	0.325743	0.141819	-0.1655	0.319	0.1535	2019 CPTAC-CRC_TMT
								EEF2	0.00194146	0.00378775	0.00378775	-0.151981	0.244396	0.0924146	-0.13645	0.217	0.08055	2019 CPTAC-CRC_TMT
								EIF2AK2	1.14929e-05	7.49953e-05	7.49953e-05	-0.279027	0.350796	0.0717688	-0.25575	0.359	0.10325	2019 CPTAC-CRC_TMT
								EIF2S1	0.000498637	0.00127216	0.00127216	-0.121774	0.214447	0.0926729	-0.1532	0.225	0.0718	2019 CPTAC-CRC_TMT
								EIF2S3	2.6368e-06	2.28141e-05	2.28141e-05	-0.207121	0.323494	0.116373	-0.22	0.326	0.106	2019 CPTAC-CRC_TMT
								EIF3D	0.00610906	0.010216	0.010216	-0.0993764	0.185535	0.0861583	-0.12665	0.181	0.05435	2019 CPTAC-CRC_TMT
								EIF3F	0.123439	0.151632	0.151632	-0.0921168	0.136696	0.0445792	-0.04585	0.128	0.08215	2019 CPTAC-CRC_TMT
								EIF4A1	0.00316646	0.00562612	0.00562612	-0.228099	0.328035	0.0999354	-0.2135	0.339	0.1255	2019 CPTAC-CRC_TMT
								EIF5A	0.529489	0.566497	0.566497	-0.0731207	0.130008	0.0568875	0.02635	0.0221	0.04845	2019 CPTAC-CRC_TMT
								EIF5B	0.00727153	0.0116696	0.0116696	-0.132371	0.219086	0.0867146	-0.13125	0.227	0.09575	2019 CPTAC-CRC_TMT
								ELAVL1	0.134341	0.163012	0.163012	-0.07268	0.218061	0.145381	-0.065	0.231	0.166	2019 CPTAC-CRC_TMT
								EMG1	1.38745e-08	3.13348e-07	3.13348e-07	-0.388471	0.418898	0.0304271	-0.33985	0.429	0.08915	2019 CPTAC-CRC_TMT
								ENO1	0.185487	0.215859	0.215859	-0.102586	0.151863	0.0492771	-0.0721	0.121	0.0489	2019 CPTAC-CRC_TMT
								EZR	0.715574	0.741663	0.741663	0.00399137	0.0140857	0.0180771	-0.0178	-0.0046	-0.0224	2019 CPTAC-CRC_TMT
								FAM98A	0.712883	0.741663	0.741663	-0.0232806	0.0593306	0.03605	-0.0371	0.0516	0.0145	2019 CPTAC-CRC_TMT
								FBL	0.0426085	0.0576809	0.0576809	-0.107637	0.292647	0.18501	-0.125	0.261	0.136	2019 CPTAC-CRC_TMT
								FIP1L1	9.91211e-05	0.000345146	0.000345146	-0.169291	0.162827	-0.00646458	-0.2141	0.195	-0.0191	2019 CPTAC-CRC_TMT
								FRG1	0.324666	0.360941	0.360941	0.270739	-0.162235	0.108504	-0.05015	0.141	0.09085	2019 CPTAC-CRC_TMT
								FUS	0.0166214	0.024684	0.024684	-0.165258	0.307024	0.141767	-0.178	0.31	0.132	2019 CPTAC-CRC_TMT
								FXR1	0.183105	0.215733	0.215733	-0.0625515	0.157727	0.095175	-0.0225	0.162	0.1395	2019 CPTAC-CRC_TMT
								G3BP2	0.000459838	0.0012201	0.0012201	-0.182658	0.181598	-0.00106042	-0.17015	0.171	0.00085	2019 CPTAC-CRC_TMT
								GNL3	6.27342e-06	4.62374e-05	4.62374e-05	-0.255145	0.409851	0.154706	-0.257	0.424	0.167	2019 CPTAC-CRC_TMT
								GTPBP4	2.92402e-10	1.9396e-08	1.9396e-08	-0.340299	0.465347	0.125048	-0.3315	0.442	0.1105	2019 CPTAC-CRC_TMT
								HEATR1	1.41715e-08	3.13348e-07	3.13348e-07	-0.274875	0.356598	0.0817229	-0.24775	0.335	0.08725	2019 CPTAC-CRC_TMT
								HIST1H1B	0.102957	0.128858	0.128858	-0.0949576	0.225235	0.130277	-0.144	0.262	0.118	2019 CPTAC-CRC_TMT
								HNRNPA0	0.137181	0.165448	0.165448	-0.114567	0.238004	0.123438	-0.154	0.259	0.105	2019 CPTAC-CRC_TMT
								HNRNPA1	6.405e-05	0.000264099	0.000264099	-0.271743	0.362333	0.0905896	-0.20425	0.291	0.08675	2019 CPTAC-CRC_TMT
								HNRNPA2B1	0.000987943	0.00218513	0.00218513	-0.148976	0.276976	0.128	-0.137	0.272	0.135	2019 CPTAC-CRC_TMT
								HNRNPA3	0.211927	0.240991	0.240991	-0.0612229	0.179702	0.118479	-0.09435	0.209	0.11465	2019 CPTAC-CRC_TMT
								HNRNPAB	0.0228181	0.0326677	0.0326677	-0.155186	0.261471	0.106285	-0.1405	0.287	0.1465	2019 CPTAC-CRC_TMT
								HNRNPC	0.0124146	0.0191512	0.0191512	-0.138256	0.29871	0.160454	-0.1125	0.307	0.1945	2019 CPTAC-CRC_TMT
								HNRNPH1	0.0706891	0.091345	0.091345	-0.0596544	0.11389	0.0542354	-0.0061	0.046	0.0399	2019 CPTAC-CRC_TMT
								HNRNPK	0.006888	0.0112353	0.0112353	-0.118271	0.231708	0.113437	-0.0525	0.208	0.1555	2019 CPTAC-CRC_TMT
								HNRNPL	9.6213e-05	0.000341936	0.000341936	-0.135863	0.240257	0.104394	-0.1475	0.235	0.0875	2019 CPTAC-CRC_TMT
								HNRNPM	0.000233302	0.000672855	0.000672855	-0.203178	0.314943	0.111765	-0.1585	0.329	0.1705	2019 CPTAC-CRC_TMT
								HNRNPU	7.56754e-05	0.000295283	0.000295283	-0.166987	0.283818	0.116831	-0.112	0.263	0.151	2019 CPTAC-CRC_TMT
								HNRNPUL1	0.191555	0.220344	0.220344	-0.0542654	0.190661	0.136396	-0.0505	0.185	0.1345	2019 CPTAC-CRC_TMT
								HNRNPUL2	0.729087	0.751753	0.751753	-0.018727	0.115302	0.096575	-0.0569	0.124	0.0671	2019 CPTAC-CRC_TMT
								HSP90AB1	1.14085e-10	1.13514e-08	1.13514e-08	-0.379128	0.442973	0.0638458	-0.37815	0.429	0.05085	2019 CPTAC-CRC_TMT
								IGF2BP1	0.542908	0.577747	0.577747	0.235288	-4.55265	-4.31736	0	-5.41	-5.41	2019 CPTAC-CRC_TMT
								IGF2BP3	0.376754	0.409695	0.409695	-0.188965	0.286757	0.0977917	-0.132	0.405	0.273	2019 CPTAC-CRC_TMT
								ILF2	0.0116743	0.0181499	0.0181499	-0.112828	0.232959	0.120131	-0.118	0.239	0.121	2019 CPTAC-CRC_TMT
								ILF3	0.000395892	0.0010942	0.0010942	-0.143009	0.311571	0.168563	-0.148	0.293	0.145	2019 CPTAC-CRC_TMT
								KPNB1	0.00696329	0.0112658	0.0112658	-0.112641	0.156216	0.043575	-0.0961	0.159	0.0629	2019 CPTAC-CRC_TMT
								LARP1	6.30882e-05	0.000264099	0.000264099	-0.194022	0.281143	0.0871208	-0.168	0.304	0.136	2019 CPTAC-CRC_TMT
								LARS	0.066306	0.0868085	0.0868085	-0.0795128	0.222584	0.143071	-0.0535	0.242	0.1885	2019 CPTAC-CRC_TMT
								LBR	5.86217e-06	4.62374e-05	4.62374e-05	-0.341213	0.329267	-0.0119458	-0.32555	0.357	0.03145	2019 CPTAC-CRC_TMT
								LYAR	6.28228e-07	6.48881e-06	6.48881e-06	-0.34059	0.455886	0.115296	-0.3668	0.454	0.0872	2019 CPTAC-CRC_TMT
								MAP4	0.0429778	0.0577877	0.0577877	0.0822173	-0.159167	-0.07695	0.13275	-0.19	-0.05725	2019 CPTAC-CRC_TMT
								MATR3	8.2842e-05	0.000311048	0.000311048	-0.196348	0.255412	0.0590646	-0.25285	0.285	0.03215	2019 CPTAC-CRC_TMT
								MCM3	6.94777e-06	4.93788e-05	4.93788e-05	-0.461805	0.440663	-0.0211417	-0.3561	0.311	-0.0451	2019 CPTAC-CRC_TMT
								MCM5	2.35471e-05	0.000111568	0.000111568	-0.409803	0.397565	-0.0122375	-0.2865	0.277	-0.0095	2019 CPTAC-CRC_TMT
								MKI67	1.65019e-05	9.12191e-05	9.12191e-05	-0.452852	0.468096	0.0152438	-0.3991	0.424	0.0249	2019 CPTAC-CRC_TMT
								MOV10	0.361374	0.397311	0.397311	-0.0473336	0.0992857	0.0519521	-0.06695	0.0778	0.01085	2019 CPTAC-CRC_TMT
								MYBBP1A	6.16961e-06	4.62374e-05	4.62374e-05	-0.287952	0.40061	0.112658	-0.2365	0.355	0.1185	2019 CPTAC-CRC_TMT
								MYH9	0.488507	0.528331	0.528331	0.0495804	0.175361	0.224942	0.0465	0.164	0.2105	2019 CPTAC-CRC_TMT
								MYO1C	1.16827e-05	7.49953e-05	7.49953e-05	0.326964	-0.81802	-0.491056	0.3285	-0.867	-0.5385	2019 CPTAC-CRC_TMT
								NAT10	3.92639e-07	4.88345e-06	4.88345e-06	-0.262727	0.385394	0.122667	-0.3225	0.431	0.1085	2019 CPTAC-CRC_TMT
								NCL	0.000585681	0.0014389	0.0014389	-0.248628	0.372351	0.123723	-0.238	0.389	0.151	2019 CPTAC-CRC_TMT
								NCOA5	0.000220486	0.000645246	0.000645246	-0.213699	0.270247	0.0565479	-0.19445	0.242	0.04755	2019 CPTAC-CRC_TMT
								NKRF	0.0752226	0.0965761	0.0965761	0.0272784	-0.206237	-0.178958	-0.219	0.306	0.087	2019 CPTAC-CRC_TMT
								NOC4L	2.75534e-09	1.37078e-07	1.37078e-07	-0.106856	0.173614	0.0667583	-0.28395	0.376	0.09205	2019 CPTAC-CRC_TMT
								NOL6	1.18278e-07	1.81056e-06	1.81056e-06	-0.262342	0.334886	0.0725438	-0.25885	0.327	0.06815	2019 CPTAC-CRC_TMT
								NONO	0.000609532	0.00147923	0.00147923	-0.142705	0.300157	0.157452	-0.136	0.277	0.141	2019 CPTAC-CRC_TMT
								NOP2	1.12297e-08	3.13348e-07	3.13348e-07	-0.3036	0.443012	0.139412	-0.3095	0.44	0.1305	2019 CPTAC-CRC_TMT
								NOP56	0.046033	0.0610704	0.0610704	-0.107389	0.298037	0.190648	-0.131	0.269	0.138	2019 CPTAC-CRC_TMT
								NOP58	0.0387123	0.0527654	0.0527654	-0.0784452	0.286833	0.208388	-0.1075	0.248	0.1405	2019 CPTAC-CRC_TMT
								NPM1	0.000191177	0.000575928	0.000575928	-0.304953	0.389037	0.0840833	-0.2604	0.348	0.0876	2019 CPTAC-CRC_TMT
								NPM3	0.0290155	0.0400978	0.0400978	-0.210971	-0.337708	-0.548679	-0.18385	0.139	-0.04485	2019 CPTAC-CRC_TMT
								PA2G4	0.000143206	0.000467179	0.000467179	-0.186282	0.301784	0.115502	-0.17	0.281	0.111	2019 CPTAC-CRC_TMT
								PABPC1	8.2842e-05	0.000311048	0.000311048	-0.205047	0.330635	0.125587	-0.183	0.339	0.156	2019 CPTAC-CRC_TMT
								PABPC4	0.104489	0.129958	0.129958	-0.103962	0.221443	0.117481	-0.056	0.203	0.147	2019 CPTAC-CRC_TMT
								PARP1	0.000752767	0.00174187	0.00174187	-0.265646	0.283969	0.0183229	-0.18655	0.22	0.03345	2019 CPTAC-CRC_TMT
								PCBP1	0.066841	0.086937	0.086937	-0.0652283	0.150741	0.0855125	-0.0645	0.17	0.1055	2019 CPTAC-CRC_TMT
								PCBP2	0.0104221	0.0163307	0.0163307	-0.115921	0.187292	0.0713708	-0.09325	0.163	0.06975	2019 CPTAC-CRC_TMT
								PDCD11	1.11457e-07	1.81056e-06	1.81056e-06	-0.251808	0.366814	0.115006	-0.202	0.323	0.121	2019 CPTAC-CRC_TMT
								PFN1	0.00265368	0.00502936	0.00502936	0.30512	-0.525159	-0.22004	0.2615	-0.5	-0.2385	2019 CPTAC-CRC_TMT
								PGAM5	0.108397	0.133981	0.133981	-0.0632134	0.236957	0.173744	-0.1195	0.241	0.1215	2019 CPTAC-CRC_TMT
								PHGDH	0.350099	0.387054	0.387054	-0.157074	-0.175276	-0.33235	-0.3622	-0.0723	-0.4345	2019 CPTAC-CRC_TMT
								PLEC	0.00958845	0.0151437	0.0151437	0.181019	-0.0868102	0.0942083	0.1349	-0.0254	0.1095	2019 CPTAC-CRC_TMT
								PLRG1	0.00187165	0.00372458	0.00372458	-0.148172	0.249949	0.101777	-0.0985	0.222	0.1235	2019 CPTAC-CRC_TMT
								POP1	0.0035972	0.00627933	0.00627933	-0.184091	0.205133	0.0210417	-0.20565	0.228	0.02235	2019 CPTAC-CRC_TMT
								PPP2R1A	0.571113	0.601331	0.601331	-0.024656	0.0307122	0.00605625	-0.01835	0.0198	0.00145	2019 CPTAC-CRC_TMT
								PRDX1	0.506201	0.544508	0.544508	-0.0493576	0.0602367	0.0108792	-0.0082	0.0062	-0.002	2019 CPTAC-CRC_TMT
								PRKDC	0.00284891	0.00529844	0.00529844	-0.185371	0.337102	0.151731	-0.159	0.35	0.191	2019 CPTAC-CRC_TMT
								PRPF19	1.91019e-05	9.74686e-05	9.74686e-05	-0.211574	0.348741	0.137167	-0.232	0.376	0.144	2019 CPTAC-CRC_TMT
								PRPF3	0.00124244	0.00254891	0.00254891	-0.132291	0.244816	0.112525	-0.17285	0.275	0.10215	2019 CPTAC-CRC_TMT
								PRPF4	6.40358e-05	0.000264099	0.000264099	-0.152222	0.256039	0.103817	-0.1225	0.245	0.1225	2019 CPTAC-CRC_TMT
								PRPF40A	0.000453669	0.00122	0.00122	-0.191178	0.324243	0.133065	-0.1965	0.354	0.1575	2019 CPTAC-CRC_TMT
								PRPF8	1.5968e-05	9.07893e-05	9.07893e-05	-0.126147	0.258341	0.132194	-0.144	0.269	0.125	2019 CPTAC-CRC_TMT
								PSIP1	0.184295	0.215733	0.215733	-0.0825507	0.0409673	-0.0415833	-0.06075	0.0918	0.03105	2019 CPTAC-CRC_TMT
								PTBP1	0.0150327	0.022663	0.022663	-0.131458	0.262514	0.131056	-0.128	0.238	0.11	2019 CPTAC-CRC_TMT
								PWP1	0.183957	0.215733	0.215733	-0.135409	0.153859	0.01845	-0.039	0.0876	0.0486	2019 CPTAC-CRC_TMT
								PWP2	0.000180508	0.000561266	0.000561266	-0.241844	0.370508	0.128665	-0.24	0.375	0.135	2019 CPTAC-CRC_TMT
								RAB7A	0.00278236	0.00522349	0.00522349	-0.115949	0.171333	0.0553833	-0.0761	0.132	0.0559	2019 CPTAC-CRC_TMT
								RAC2	0.965468	0.965468	0.965468	0.0549318	-0.111076	-0.0561437	0.0939	-0.192	-0.0981	2019 CPTAC-CRC_TMT
								RALY	0.00116657	0.00246966	0.00246966	-0.253004	0.346698	0.0936938	-0.26545	0.362	0.09655	2019 CPTAC-CRC_TMT
								RARS	0.0267478	0.0377505	0.0377505	-0.0868479	0.1852	0.0983521	-0.0908	0.192	0.1012	2019 CPTAC-CRC_TMT
								RBBP4	0.138134	0.165595	0.165595	-0.0900233	0.18518	0.0951562	-0.10575	0.175	0.06925	2019 CPTAC-CRC_TMT
								RBBP6	0.000137081	0.000454653	0.000454653	-0.136805	0.225661	0.0888562	-0.145	0.256	0.111	2019 CPTAC-CRC_TMT
								RBM14	0.00238349	0.00456072	0.00456072	-0.0945034	0.211439	0.116935	-0.13615	0.212	0.07585	2019 CPTAC-CRC_TMT
								RBM15	0.000498637	0.00127216	0.00127216	-0.114217	0.149292	0.035075	-0.0903	0.131	0.0407	2019 CPTAC-CRC_TMT
								RBM25	0.000704764	0.00166962	0.00166962	-0.148968	0.262416	0.113448	-0.181	0.284	0.103	2019 CPTAC-CRC_TMT
								RBM39	6.0516e-07	6.48881e-06	6.48881e-06	-0.202145	0.289059	0.0869146	-0.19775	0.278	0.08025	2019 CPTAC-CRC_TMT
								RBM4	0.77663	0.796646	0.796646	0.0209035	-0.0139306	0.00697292	-0.0428	0.0607	0.0179	2019 CPTAC-CRC_TMT
								RBMX	0.0125416	0.0191983	0.0191983	-0.14622	0.261822	0.115602	-0.169	0.286	0.117	2019 CPTAC-CRC_TMT
								RCC2	1.70507e-05	9.17052e-05	9.17052e-05	-0.264217	0.36849	0.104273	-0.2734	0.377	0.1036	2019 CPTAC-CRC_TMT
								RNASEH2A	0.0162694	0.024343	0.024343	-0.128282	-0.0485388	-0.176821	-0.1683	0.14	-0.0283	2019 CPTAC-CRC_TMT
								RNASEH2B	0.00666755	0.0109656	0.0109656	-0.225502	0.281906	0.0564042	-0.19925	0.262	0.06275	2019 CPTAC-CRC_TMT
								RNASEH2C	0.126075	0.15392	0.15392	-0.00511884	-0.158304	-0.163423	-0.1066	0.168	0.0614	2019 CPTAC-CRC_TMT
								RTCB	0.144973	0.172752	0.172752	0.0435713	0.0398245	0.0833958	0.0392	0.0616	0.1008	2019 CPTAC-CRC_TMT
								RUVBL2	3.78795e-05	0.000171319	0.000171319	-0.216802	0.308124	0.0913229	-0.23665	0.323	0.08635	2019 CPTAC-CRC_TMT
								SAFB	0.00735019	0.0117015	0.0117015	-0.118363	0.24929	0.130927	-0.139	0.274	0.135	2019 CPTAC-CRC_TMT
								SART1	0.094845	0.119457	0.119457	-0.0618368	0.148733	0.0868958	-0.09195	0.148	0.05605	2019 CPTAC-CRC_TMT
								SART3	0.0033955	0.00597968	0.00597968	-0.113943	0.195716	0.0817729	-0.1288	0.21	0.0812	2019 CPTAC-CRC_TMT
								SERBP1	0.0287946	0.0400708	0.0400708	-0.120655	0.232057	0.111402	-0.1045	0.261	0.1565	2019 CPTAC-CRC_TMT
								SFPQ	0.00102679	0.00224539	0.00224539	-0.118621	0.258771	0.14015	-0.109	0.243	0.134	2019 CPTAC-CRC_TMT
								SKIV2L2	1.40076e-05	8.19858e-05	8.19858e-05	-0.167579	0.260686	0.0931063	-0.128	0.233	0.105	2019 CPTAC-CRC_TMT
								SLC25A5	0.2601	0.29409	0.29409	-0.0982852	0.11121	0.012925	-0.1032	0.0857	-0.0175	2019 CPTAC-CRC_TMT
								SMARCA4	0.00302134	0.00546588	0.00546588	-0.137066	0.20631	0.0692438	-0.14585	0.212	0.06615	2019 CPTAC-CRC_TMT
								SMARCA5	7.48906e-09	2.48387e-07	2.48387e-07	-0.25107	0.362053	0.110983	-0.1965	0.313	0.1165	2019 CPTAC-CRC_TMT
								SND1	3.50392e-07	4.64854e-06	4.64854e-06	-0.207028	0.313251	0.106223	-0.2416	0.342	0.1004	2019 CPTAC-CRC_TMT
								SNRNP200	1.75037e-06	1.58329e-05	1.58329e-05	-0.133709	0.266182	0.132473	-0.1095	0.249	0.1395	2019 CPTAC-CRC_TMT
								SNRPD1	0.305557	0.341605	0.341605	-0.0836113	0.155057	0.0714458	-0.041	0.187	0.146	2019 CPTAC-CRC_TMT
								SNRPD2	2.3171e-05	0.000111568	0.000111568	-0.157399	0.279661	0.122262	-0.173	0.292	0.119	2019 CPTAC-CRC_TMT
								SNW1	2.10331e-05	0.00010464	0.00010464	-0.152966	0.246447	0.0934813	-0.21625	0.277	0.06075	2019 CPTAC-CRC_TMT
								SON	0.0783084	0.0998935	0.0998935	-0.0566401	0.142276	0.0856354	-0.1019	0.174	0.0721	2019 CPTAC-CRC_TMT
								SRP14	0.0170932	0.0251966	0.0251966	-0.115646	0.21758	0.101933	-0.1458	0.198	0.0522	2019 CPTAC-CRC_TMT
								SRPK1	0.000447538	0.00122	0.00122	-0.2676	0.310812	0.0432125	-0.2233	0.31	0.0867	2019 CPTAC-CRC_TMT
								SRRM2	0.000193896	0.000575928	0.000575928	-0.13601	0.182831	0.0468208	-0.10915	0.151	0.04185	2019 CPTAC-CRC_TMT
								SRSF1	0.0295959	0.0406178	0.0406178	-0.0932145	0.242106	0.148892	-0.1585	0.29	0.1315	2019 CPTAC-CRC_TMT
								SRSF10	0.000988248	0.00218513	0.00218513	-0.207977	0.242284	0.0343063	-0.2854	0.314	0.0286	2019 CPTAC-CRC_TMT
								SRSF7	0.000257572	0.000732239	0.000732239	-0.203725	0.3118	0.108075	-0.238	0.359	0.121	2019 CPTAC-CRC_TMT
								SSRP1	0.000113271	0.000382048	0.000382048	-0.306286	0.392376	0.0860896	-0.2785	0.398	0.1195	2019 CPTAC-CRC_TMT
								STAU1	0.00291663	0.00537415	0.00537415	-0.217278	0.316341	0.0990625	-0.1735	0.309	0.1355	2019 CPTAC-CRC_TMT
								STRAP	0.197758	0.226171	0.226171	-0.0748747	0.102612	0.0277375	-0.0675	0.107	0.0395	2019 CPTAC-CRC_TMT
								SUPT16H	9.62232e-05	0.000341936	0.000341936	-0.271747	0.362157	0.0904104	-0.321	0.427	0.106	2019 CPTAC-CRC_TMT
								SYNCRIP	0.000914801	0.0020687	0.0020687	-0.201952	0.3547	0.152748	-0.161	0.384	0.223	2019 CPTAC-CRC_TMT
								TAF15	0.0188423	0.0273695	0.0273695	-0.228858	0.208908	-0.01995	-0.21045	0.16	-0.05045	2019 CPTAC-CRC_TMT
								TARS	0.654615	0.685623	0.685623	-0.0153259	0.0624592	0.0471333	-0.0427	0.141	0.0983	2019 CPTAC-CRC_TMT
								TBL3	0.00137414	0.00279034	0.00279034	-0.156223	0.267608	0.111385	-0.1275	0.259	0.1315	2019 CPTAC-CRC_TMT
								TCOF1	0.00122704	0.00254354	0.00254354	-0.16656	0.255008	0.0884479	-0.2135	0.287	0.0735	2019 CPTAC-CRC_TMT
								TCP1	0.00529041	0.00892197	0.00892197	-0.117017	0.18828	0.0712625	-0.07245	0.164	0.09155	2019 CPTAC-CRC_TMT
								THRAP3	0.0272443	0.0381804	0.0381804	-0.0954674	0.207563	0.112096	-0.068	0.186	0.118	2019 CPTAC-CRC_TMT
								TOP1	4.84904e-08	9.64959e-07	9.64959e-07	-0.430664	0.521643	0.0909792	-0.4276	0.538	0.1104	2019 CPTAC-CRC_TMT
								TSR1	0.0011229	0.00240276	0.00240276	-0.257056	0.26892	0.0118646	-0.20125	0.249	0.04775	2019 CPTAC-CRC_TMT
								U2AF1	7.56672e-05	0.000295283	0.000295283	-0.18779	0.29619	0.1084	-0.1845	0.309	0.1245	2019 CPTAC-CRC_TMT
								U2AF2	0.000354697	0.000994151	0.000994151	-0.184308	0.301829	0.117521	-0.1315	0.272	0.1405	2019 CPTAC-CRC_TMT
								U2SURP	5.49644e-05	0.000243065	0.000243065	-0.180484	0.282492	0.102008	-0.17595	0.256	0.08005	2019 CPTAC-CRC_TMT
								UHRF1	0.000193905	0.000575928	0.000575928	-0.432655	0.229569	-0.203085	-0.3127	0.259	-0.0537	2019 CPTAC-CRC_TMT
								UPF1	0.000782844	0.00179064	0.00179064	-0.126501	0.189461	0.0629604	-0.11795	0.194	0.07605	2019 CPTAC-CRC_TMT
								USP10	4.83183e-07	5.65608e-06	5.65608e-06	-0.185038	0.177871	-0.00716667	-0.15155	0.165	0.01345	2019 CPTAC-CRC_TMT
								UTP14A	0.000156243	0.000501489	0.000501489	-0.209271	0.274992	0.0657208	-0.1853	0.282	0.0967	2019 CPTAC-CRC_TMT
								VARS	0.013737	0.0208677	0.0208677	-0.0951396	0.1906	0.0954604	-0.09205	0.162	0.06995	2019 CPTAC-CRC_TMT
								VDAC2	0.925267	0.92994	0.92994	0.0170455	0.0399857	0.0570312	-0.0333	0.0307	-0.0026	2019 CPTAC-CRC_TMT
								WDR3	1.31153e-05	7.90892e-05	7.90892e-05	-0.221884	0.354553	0.132669	-0.19295	0.296	0.10305	2019 CPTAC-CRC_TMT
								WDR36	2.98301e-06	2.47341e-05	2.47341e-05	-0.239671	0.325812	0.0861417	-0.24315	0.316	0.07285	2019 CPTAC-CRC_TMT
								XRN2	0.00106676	0.00230744	0.00230744	-0.18116	0.340627	0.159467	-0.1926	0.312	0.1194	2019 CPTAC-CRC_TMT
								YBX1	0.00121163	0.00253805	0.00253805	-0.173013	0.257065	0.0840521	-0.1685	0.257	0.0885	2019 CPTAC-CRC_TMT
								ZC3H11A	0.00624424	0.010355	0.010355	-0.114911	0.209467	0.0945562	-0.1099	0.217	0.1071	2019 CPTAC-CRC_TMT
								ZC3H15	0.000634232	0.00152063	0.00152063	-0.193322	0.302843	0.109521	-0.166	0.313	0.147	2019 CPTAC-CRC_TMT
								ZC3HAV1	0.00427214	0.00732893	0.00732893	-0.102888	0.132996	0.0301083	-0.1141	0.131	0.0169	2019 CPTAC-CRC_TMT
								ZFR	0.00298638	0.00545219	0.00545219	-0.140911	0.166992	0.0260813	-0.14295	0.169	0.02605	2019 CPTAC-CRC_TMT
								ZNF207	3.08761e-05	0.000142892	0.000142892	-0.202115	0.263276	0.0611604	-0.19625	0.254	0.05775	2019 CPTAC-CRC_TMT
								ABCF1	5.67933e-06	9.20972e-06	9.20972e-06	-0.550065	-0.284588	-0.834653	-0.476	-0.249	-0.725	2020 Cancer Cell
								ACIN1	4.18897e-07	8.19581e-07	8.19581e-07	-1.07445	0.169412	-0.905041	-0.635	0.066	-0.569	2020 Cancer Cell
								ALYREF	7.53775e-06	1.2007e-05	1.2007e-05	-0.637824	1.09376	0.455939	-0.652	1.179	0.527	2020 Cancer Cell
								APOBEC3C	0.336895	0.352564	0.352564	0.435772	-7.23861	-6.80284	0.598	-4.99	-4.392	2020 Cancer Cell
								AQR	0.162412	0.171966	0.171966	-1.76385	-2.85743	-4.62129	-0.233	-2.257	-2.49	2020 Cancer Cell
								BUB3	7.25313e-12	3.9568e-11	3.9568e-11	-0.753068	1.31364	0.560571	-0.804	1.377	0.573	2020 Cancer Cell
								C14orf166	9.9647e-07	1.771e-06	1.771e-06	-0.478629	1.02863	0.55	-0.526	1.067	0.541	2020 Cancer Cell
								CCT3	2.34467e-08	5.70325e-08	5.70325e-08	-0.719934	3.33551	2.61557	-0.826	3.412	2.586	2020 Cancer Cell
								CCT4	3.23792e-10	1.16565e-09	1.16565e-09	-0.526201	2.01667	1.49047	-0.56	2.015	1.455	2020 Cancer Cell
								CCT6A	1.45316e-13	1.24557e-12	1.24557e-12	-0.752342	2.94548	2.19314	-0.753	2.93	2.177	2020 Cancer Cell
								CCT8	1.3182e-09	4.02163e-09	4.02163e-09	-0.728173	2.48997	1.7618	-0.701	2.515	1.814	2020 Cancer Cell
								CDC5L	0.0048935	0.00568277	0.00568277	-0.867664	0.922072	0.0544082	-0.642	0.963	0.321	2020 Cancer Cell
								CLTC	0.00379416	0.00446372	0.00446372	-0.351886	3.06182	2.70994	-0.295	3.095	2.8	2020 Cancer Cell
								CMAS	0.00122694	0.00153367	0.00153367	-0.658182	0.929856	0.271673	-0.669	0.942	0.273	2020 Cancer Cell
								CORO1A	0.00231862	0.00278235	0.00278235	0.321815	2.17912	2.50094	0.35	2.141	2.491	2020 Cancer Cell
								DDB1	3.26838e-08	7.74091e-08	7.74091e-08	-0.418823	0.991701	0.572878	-0.4	0.987	0.587	2020 Cancer Cell
								DDX1	8.97074e-06	1.41643e-05	1.41643e-05	-0.544261	1.27657	0.732306	-0.468	1.412	0.944	2020 Cancer Cell
								DDX21	1.0291e-15	3.0873e-14	3.0873e-14	-1.66578	1.327	-0.338776	-1.573	1.307	-0.266	2020 Cancer Cell
								DDX23	3.59646e-07	7.19292e-07	7.19292e-07	-1.17312	0.318062	-0.855061	-0.745	0.358	-0.387	2020 Cancer Cell
								DDX3X	9.87881e-05	0.000136784	0.000136784	-0.48231	2.07639	1.59408	-0.569	2.269	1.7	2020 Cancer Cell
								DDX41	7.25967e-09	1.97991e-08	1.97991e-08	-7.15301	-5.8966	-13.0496	-14.8	-2.177	-16.977	2020 Cancer Cell
								DDX46	3.86723e-05	5.61372e-05	5.61372e-05	-0.904862	0.310454	-0.594408	-0.924	0.136	-0.788	2020 Cancer Cell
								DDX5	2.36832e-18	4.26298e-16	4.26298e-16	-1.09267	1.89648	0.803816	-1.005	1.911	0.906	2020 Cancer Cell
								DDX6	6.74132e-08	1.4798e-07	1.4798e-07	-1.06481	1.33515	0.270347	-0.807	1.498	0.691	2020 Cancer Cell
								DHX15	4.2556e-16	1.53202e-14	1.53202e-14	-1.23381	1.60346	0.369653	-1.081	1.617	0.536	2020 Cancer Cell
								DHX36	0.002788	0.00330158	0.00330158	-1.85959	-2.02249	-3.88208	-0.568	-1.775	-2.343	2020 Cancer Cell
								DHX9	2.22641e-15	5.18093e-14	5.18093e-14	-0.83598	2.52106	1.68508	-0.705	2.516	1.811	2020 Cancer Cell
								DKC1	6.66314e-08	1.4798e-07	1.4798e-07	-0.84835	0.86233	0.0139796	-0.885	0.97	0.085	2020 Cancer Cell
								DNAJA3	4.01054e-07	7.93293e-07	7.93293e-07	-1.25788	1.09952	-0.158367	-0.902	1.206	0.304	2020 Cancer Cell
								DNMT1	6.13254e-05	8.69178e-05	8.69178e-05	-2.45846	-0.698299	-3.15676	-0.872	-0.608	-1.48	2020 Cancer Cell
								EEF1A1	0.0212106	0.024012	0.024012	-0.979976	1.72513	0.745153	-1.0375	3.2505	2.213	2020 Cancer Cell
								EEF1G	1.72488e-13	1.41126e-12	1.41126e-12	-0.740188	4.18343	3.44324	-0.759	4.245	3.486	2020 Cancer Cell
								EEF2	3.52902e-11	1.51244e-10	1.51244e-10	-0.636198	4.13138	3.49518	-0.553	4.124	3.571	2020 Cancer Cell
								EIF2AK2	1.61952e-09	4.77891e-09	4.77891e-09	-0.840851	-0.571557	-1.41241	-0.698	-0.544	-1.242	2020 Cancer Cell
								EIF2S1	3.61838e-13	2.71378e-12	2.71378e-12	-0.78939	2.57625	1.78686	-0.72	2.554	1.834	2020 Cancer Cell
								EIF2S3	4.53922e-11	1.85695e-10	1.85695e-10	-0.721548	1.99171	1.27016	-0.593	1.94	1.347	2020 Cancer Cell
								EIF3D	2.00739e-08	5.01847e-08	5.01847e-08	-0.632957	0.988753	0.355796	-0.614	1.097	0.483	2020 Cancer Cell
								EIF3F	9.97026e-06	1.56056e-05	1.56056e-05	-0.478991	0.957072	0.478082	-0.506	1.066	0.56	2020 Cancer Cell
								EIF5A	3.19925e-05	4.68183e-05	4.68183e-05	-0.610037	2.01761	1.40757	-0.586	2.154	1.568	2020 Cancer Cell
								EIF5B	4.35443e-11	1.82279e-10	1.82279e-10	-1.0201	0.00526804	-1.01484	-1.076	0.143	-0.933	2020 Cancer Cell
								ELAVL1	7.81637e-15	1.25141e-13	1.25141e-13	-0.952117	2.19344	1.24133	-0.993	2.264	1.271	2020 Cancer Cell
								EMG1	1.85581e-09	5.38785e-09	5.38785e-09	-8.64554	-5.20595	-13.8515	-14.446	-2.531	-16.977	2020 Cancer Cell
								EZR	0.541013	0.559668	0.559668	0.0191496	2.92834	2.94749	0.064	2.933	2.997	2020 Cancer Cell
								FAM98A	0.00502107	0.00579354	0.00579354	-0.610678	-0.870588	-1.48127	-0.316	-0.83	-1.146	2020 Cancer Cell
								FBL	6.58678e-07	1.2613e-06	1.2613e-06	-0.605973	1.78332	1.17735	-0.564	1.691	1.127	2020 Cancer Cell
								FIP1L1	0.00058874	0.000756951	0.000756951	-4.40013	-1.89813	-6.29827	-1.339	-1.345	-2.684	2020 Cancer Cell
								FRG1	7.01003e-06	1.12661e-05	1.12661e-05	-6.03041	-7.11298	-13.1434	-14.592	-2.385	-16.977	2020 Cancer Cell
								FUS	2.01985e-06	3.36641e-06	3.36641e-06	-0.62762	1.8748	1.24718	-0.73	1.98	1.25	2020 Cancer Cell
								FXR1	0.000693571	0.000879175	0.000879175	-1.14804	0.205814	-0.942224	-0.644	0.179	-0.465	2020 Cancer Cell
								G3BP2	1.05607e-05	1.63873e-05	1.63873e-05	-1.00699	-1.06728	-2.07427	-0.852	-1.125	-1.977	2020 Cancer Cell
								GNL3	0.00176664	0.00214861	0.00214861	-1.96749	0.224309	-1.74318	-0.561	0.409	-0.152	2020 Cancer Cell
								GTPBP4	5.79253e-07	1.12113e-06	1.12113e-06	-1.50173	-0.0795155	-1.58124	-1.226	-0.267	-1.493	2020 Cancer Cell
								HEATR1	7.94791e-10	2.60114e-09	2.60114e-09	-0.829304	-0.600227	-1.42953	-1.231	-0.63	-1.861	2020 Cancer Cell
								HNRNPA0	6.84446e-12	3.9568e-11	3.9568e-11	-0.812487	4.97869	4.1662	-0.912	5.069	4.157	2020 Cancer Cell
								HNRNPA2B1	8.26207e-12	4.1316e-11	4.1316e-11	-0.630119	3.72767	3.09755	-0.646	3.777	3.131	2020 Cancer Cell
								HNRNPA3	7.89615e-07	1.46527e-06	1.46527e-06	-0.488164	2.19208	1.70392	-0.472	2.283	1.811	2020 Cancer Cell
								HNRNPAB	2.70237e-11	1.21607e-10	1.21607e-10	-0.934254	3.24585	2.31159	-0.817	3.349	2.532	2020 Cancer Cell
								HNRNPC	7.17681e-14	7.17878e-13	7.17878e-13	-0.732232	2.7717	2.03947	-0.68	2.769	2.089	2020 Cancer Cell
								HNRNPH1	1.33259e-08	3.3784e-08	3.3784e-08	-0.588597	3.35249	2.7639	-0.534	3.393	2.859	2020 Cancer Cell
								HNRNPL	2.41747e-12	1.45048e-11	1.45048e-11	-0.733139	2.16259	1.42945	-0.712	2.207	1.495	2020 Cancer Cell
								HNRNPM	4.54113e-08	1.02175e-07	1.02175e-07	-0.733507	3.15167	2.41816	-0.636	3.145	2.509	2020 Cancer Cell
								HNRNPU	4.60639e-14	5.18219e-13	5.18219e-13	-0.906341	3.26546	2.35912	-0.893	3.289	2.396	2020 Cancer Cell
								HNRNPUL1	9.15122e-13	6.10081e-12	6.10081e-12	-0.90221	1.32354	0.421327	-0.87	1.351	0.481	2020 Cancer Cell
								HNRNPUL2	1.35262e-09	4.05787e-09	4.05787e-09	-0.691151	2.06885	1.37769	-0.557	2.081	1.524	2020 Cancer Cell
								HSP90AB1	2.63132e-16	1.18409e-14	1.18409e-14	-0.736349	5.31621	4.57986	-0.636	5.298	4.662	2020 Cancer Cell
								IGF2BP1	0.0912587	0.0971987	0.0971987	-0.55041	0.458186	-0.0922245	-0.195	0.007	-0.188	2020 Cancer Cell
								IGF2BP3	0.0473592	0.0522985	0.0522985	-2.49771	-2.50674	-5.00445	-0.412	-2.23	-2.642	2020 Cancer Cell
								ILF2	8.34274e-15	1.25141e-13	1.25141e-13	-1.18827	3.01835	1.83008	-1.196	3.121	1.925	2020 Cancer Cell
								ILF3	1.59846e-14	1.91815e-13	1.91815e-13	-0.962045	3.10645	2.14441	-0.916	3.169	2.253	2020 Cancer Cell
								KPNB1	0.0862085	0.0923663	0.0923663	-0.267942	3.40931	3.14137	-0.054	3.437	3.383	2020 Cancer Cell
								LARP1	7.27719e-11	2.8476e-10	2.8476e-10	-1.81586	-0.46332	-2.27918	-1.076	-0.29	-1.366	2020 Cancer Cell
								LBR	0.000417371	0.00054048	0.00054048	-0.505246	2.11214	1.6069	-0.676	2.154	1.478	2020 Cancer Cell
								LYAR	1.3324e-06	2.32846e-06	2.32846e-06	-3.06395	-0.842784	-3.90673	-0.726	-0.545	-1.271	2020 Cancer Cell
								MAP4	0.933942	0.933942	0.933942	-0.00420555	1.67714	1.67294	-0.175	1.766	1.591	2020 Cancer Cell
								MATR3	1.0197e-08	2.69919e-08	2.69919e-08	-0.668462	1.56528	0.896816	-0.719	1.667	0.948	2020 Cancer Cell
								MCM3	8.07629e-15	1.25141e-13	1.25141e-13	-1.4547	0.953247	-0.501449	-1.401	1.008	-0.393	2020 Cancer Cell
								MCM5	0.00024278	0.000321326	0.000321326	-0.602493	0.51833	-0.0841633	-0.98	0.674	-0.306	2020 Cancer Cell
								MKI67	0.695328	0.711131	0.711131	-0.547149	-0.954443	-1.50159	-0.149	-0.779	-0.928	2020 Cancer Cell
								MOV10	0.482387	0.501905	0.501905	-0.504373	-2.06146	-2.56584	0.337	-1.929	-1.592	2020 Cancer Cell
								MYBBP1A	2.30264e-15	5.18093e-14	5.18093e-14	-1.48825	0.145103	-1.34314	-1.48	0.178	-1.302	2020 Cancer Cell
								MYH9	0.80523	0.814277	0.814277	0.00691079	4.59174	4.59865	-0.023	4.629	4.606	2020 Cancer Cell
								MYO1C	0.0524382	0.0575542	0.0575542	0.458685	-2.99565	-2.53697	0.7705	-0.5345	0.236	2020 Cancer Cell
								NAT10	8.50565e-07	1.56226e-06	1.56226e-06	-3.08186	-3.99524	-7.0771	-7.386	-1.809	-9.195	2020 Cancer Cell
								NCOA5	1.07567e-07	2.33278e-07	2.33278e-07	-5.88757	-2.74471	-8.63229	-2.45	-1.741	-4.191	2020 Cancer Cell
								NOC4L	2.62819e-06	4.34013e-06	4.34013e-06	-3.10231	-1.0822	-4.18451	-1.145	-1.163	-2.308	2020 Cancer Cell
								NOL6	1.05086e-09	3.31849e-09	3.31849e-09	-7.49127	-1.91128	-9.40255	-5.27	-1.602	-6.872	2020 Cancer Cell
								NONO	1.05782e-08	2.75954e-08	2.75954e-08	-0.644941	2.50125	1.85631	-0.563	2.56	1.997	2020 Cancer Cell
								NOP2	1.70423e-17	1.53381e-15	1.53381e-15	-1.60287	0.808258	-0.794612	-1.612	0.916	-0.696	2020 Cancer Cell
								NOP56	4.4166e-13	3.17995e-12	3.17995e-12	-0.908965	1.5436	0.634633	-0.933	1.584	0.651	2020 Cancer Cell
								NOP58	6.11109e-15	1.22222e-13	1.22222e-13	-1.1373	1.85679	0.71949	-0.969	1.864	0.895	2020 Cancer Cell
								NPM1	1.47463e-14	1.89595e-13	1.89595e-13	-1.17102	4.45561	3.28459	-1.072	4.46	3.388	2020 Cancer Cell
								NPM3	0.00671672	0.0077007	0.0077007	-2.83785	-0.839268	-3.67712	-0.815	-0.714	-1.529	2020 Cancer Cell
								PA2G4	0.000220209	0.000295804	0.000295804	-0.840904	-0.258423	-1.09933	-0.981	2.3615	1.3805	2020 Cancer Cell
								PABPC1	1.35969e-14	1.88265e-13	1.88265e-13	-0.733463	3.20742	2.47396	-0.773	3.246	2.473	2020 Cancer Cell
								PABPC4	3.55682e-07	7.19292e-07	7.19292e-07	-0.930204	0.561959	-0.368245	-0.982	0.75	-0.232	2020 Cancer Cell
								PARP1	2.26218e-08	5.57797e-08	5.57797e-08	-0.633284	0.976835	0.343551	-0.594	1.023	0.429	2020 Cancer Cell
								PCBP1	0.0323121	0.0359024	0.0359024	-0.225116	2.71738	2.49227	-0.096	2.699	2.603	2020 Cancer Cell
								PCBP2	3.80928e-08	8.90482e-08	8.90482e-08	-0.609273	2.64876	2.03949	-0.482	2.703	2.221	2020 Cancer Cell
								PDCD11	7.69573e-05	0.000107382	0.000107382	-1.86679	-1.34293	-3.20971	-0.715	-1.337	-2.052	2020 Cancer Cell
								PFN1	0.642532	0.66089	0.66089	0.00377846	5.36271	5.36649	-0.017	5.441	5.424	2020 Cancer Cell
								PGAM5	1.59467e-16	9.56803e-15	9.56803e-15	-1.35623	1.74074	0.38451	-1.377	1.775	0.398	2020 Cancer Cell
								PHGDH	0.0289597	0.0323773	0.0323773	-0.448866	0.715866	0.267	-0.544	0.715	0.171	2020 Cancer Cell
								PLEC	0.891219	0.896198	0.896198	-0.0510877	3.3336	3.28251	-0.002	3.336	3.334	2020 Cancer Cell
								PLRG1	0.000913771	0.0011502	0.0011502	-2.47566	-1.41851	-3.89416	-0.849	-1.287	-2.136	2020 Cancer Cell
								POP1	1.00357e-06	1.771e-06	1.771e-06	-6.1137	-4.75488	-10.8686	-14.204	-2.773	-16.977	2020 Cancer Cell
								PPP2R1A	0.00210464	0.00254252	0.00254252	-0.314938	0.994959	0.68002	-0.335	1.022	0.687	2020 Cancer Cell
								PRDX1	1.51373e-05	2.28968e-05	2.28968e-05	-0.327076	4.85646	4.52939	-0.295	4.857	4.562	2020 Cancer Cell
								PRKDC	0.00134782	0.00166229	0.00166229	-0.564315	4.88482	4.32051	-0.654	4.931	4.277	2020 Cancer Cell
								PRPF19	6.23734e-09	1.72726e-08	1.72726e-08	-0.801441	1.60518	0.803735	-0.667	1.572	0.905	2020 Cancer Cell
								PRPF3	0.319917	0.336755	0.336755	-0.103871	0.623381	0.51951	-0.291	0.747	0.456	2020 Cancer Cell
								PRPF4	1.3784e-06	2.38569e-06	2.38569e-06	-1.68965	-0.0285979	-1.71824	-0.788	0.134	-0.654	2020 Cancer Cell
								PRPF40A	2.77953e-11	1.22028e-10	1.22028e-10	-1.69439	0.0760412	-1.61835	-1.059	0.182	-0.877	2020 Cancer Cell
								PRPF8	3.08476e-07	6.30975e-07	6.30975e-07	-0.476163	0.309959	-0.166204	-0.466	0.328	-0.138	2020 Cancer Cell
								PSIP1	1.2519e-09	3.88521e-09	3.88521e-09	-1.3409	-0.675629	-2.01653	-0.934	-0.601	-1.535	2020 Cancer Cell
								PTBP1	8.66957e-14	7.80261e-13	7.80261e-13	-0.853526	2.31959	1.46606	-0.809	2.362	1.553	2020 Cancer Cell
								PWP1	0.754325	0.76711	0.76711	-0.603638	-0.634485	-1.23812	0.086	0.565	0.651	2020 Cancer Cell
								PWP2	0.00262321	0.003127	0.003127	-0.983965	-1.35142	-2.33539	-0.532	-1.057	-1.589	2020 Cancer Cell
								RAB7A	6.94801e-07	1.30275e-06	1.30275e-06	-0.384061	2.634	2.24994	-0.318	2.696	2.378	2020 Cancer Cell
								RAC2	0.0563337	0.0614549	0.0614549	0.446717	1.65575	2.10247	0.242	1.888	2.13	2020 Cancer Cell
								RALY	1.13446e-11	5.519e-11	5.519e-11	-1.0735	2.70705	1.63355	-1.028	2.661	1.633	2020 Cancer Cell
								RBBP4	3.09771e-09	8.7123e-09	8.7123e-09	-0.890679	0.433557	-0.457122	-0.888	0.564	-0.324	2020 Cancer Cell
								RBM14	3.99247e-08	9.2134e-08	9.2134e-08	-0.80596	0.264124	-0.541837	-0.762	0.322	-0.44	2020 Cancer Cell
								RBM15	0.0013483	0.00166229	0.00166229	-4.76665	-4.25831	-9.02496	-1.732	-2.852	-4.584	2020 Cancer Cell
								RBM25	1.74921e-06	2.99865e-06	2.99865e-06	-0.963057	-0.0694536	-1.03251	-1.15	0.183	-0.967	2020 Cancer Cell
								RBM39	7.17878e-14	7.17878e-13	7.17878e-13	-0.854485	0.744505	-0.10998	-0.9	0.79	-0.11	2020 Cancer Cell
								RBM4	5.1445e-05	7.40807e-05	7.40807e-05	-1.26189	0.350134	-0.911755	-0.661	0.538	-0.123	2020 Cancer Cell
								RBMX	8.40061e-14	7.80261e-13	7.80261e-13	-0.791107	2.83845	2.04735	-0.832	2.883	2.051	2020 Cancer Cell
								RCC2	7.94673e-10	2.60114e-09	2.60114e-09	-0.815759	2.09239	1.27663	-0.779	2.176	1.397	2020 Cancer Cell
								RNASEH2A	0.0627754	0.0680697	0.0680697	0.375777	2.58888	2.96465	0.192	2.504	2.696	2020 Cancer Cell
								RNASEH2B	1.1646e-08	2.99469e-08	2.99469e-08	-4.82598	-4.11177	-8.93776	-1.838	-3.5	-5.338	2020 Cancer Cell
								RTCB	4.23376e-08	9.64654e-08	9.64654e-08	-0.697721	1.03064	0.332918	-0.858	1.167	0.309	2020 Cancer Cell
								RUVBL2	1.8796e-06	3.16194e-06	3.16194e-06	-0.549739	1.54745	0.997714	-0.634	1.577	0.943	2020 Cancer Cell
								SAFB	2.34662e-11	1.08306e-10	1.08306e-10	-1.20422	0.46732	-0.736898	-1.022	0.529	-0.493	2020 Cancer Cell
								SART1	1.22796e-05	1.87316e-05	1.87316e-05	-2.2764	-1.40299	-3.67939	-0.692	-0.935	-1.627	2020 Cancer Cell
								SART3	4.57081e-06	7.47951e-06	7.47951e-06	-0.643234	-0.318113	-0.961347	-0.725	-0.212	-0.937	2020 Cancer Cell
								SERBP1	1.44771e-07	3.10223e-07	3.10223e-07	-1.20982	-0.348443	-1.55827	-1.389	-0.078	-1.467	2020 Cancer Cell
								SFPQ	2.94541e-09	8.41547e-09	8.41547e-09	-3.33839	-0.263211	-3.6016	-8.148	1.1655	-6.9825	2020 Cancer Cell
								SLC25A5	0.00146895	0.00179871	0.00179871	-0.486294	4.04482	3.55853	-0.337	4.043	3.706	2020 Cancer Cell
								SMARCA5	5.43266e-10	1.88053e-09	1.88053e-09	-0.977614	0.112186	-0.865429	-1.115	0.323	-0.792	2020 Cancer Cell
								SNRNP200	7.91208e-12	4.1316e-11	4.1316e-11	-0.891672	0.833897	-0.0577755	-0.846	0.892	0.046	2020 Cancer Cell
								SNRPD1	6.97388e-10	2.36849e-09	2.36849e-09	-0.975867	1.44893	0.473061	-0.934	1.535	0.601	2020 Cancer Cell
								SNRPD2	6.76415e-13	4.68287e-12	4.68287e-12	-0.954836	2.20392	1.24908	-0.841	2.174	1.333	2020 Cancer Cell
								SNW1	0.000216648	0.000293208	0.000293208	0.510395	1.34532	1.85571	0.748	1.387	2.135	2020 Cancer Cell
								SON	1.72577e-05	2.56726e-05	2.56726e-05	-2.2171	-0.740835	-2.95794	-0.733	-0.626	-1.359	2020 Cancer Cell
								SRP14	1.63818e-07	3.46909e-07	3.46909e-07	-0.745373	0.909536	0.164163	-0.769	0.92	0.151	2020 Cancer Cell
								SRPK1	0.000134022	0.000182757	0.000182757	-1.08722	-0.595598	-1.68282	-1.082	-0.466	-1.548	2020 Cancer Cell
								SRRM2	0.0241651	0.0271858	0.0271858	-0.288027	-0.29834	-0.586367	-0.343	-0.337	-0.68	2020 Cancer Cell
								SRSF1	1.32801e-11	6.29055e-11	6.29055e-11	-0.793274	2.46585	1.67257	-1.035	2.66	1.625	2020 Cancer Cell
								SRSF10	2.23815e-07	4.68449e-07	4.68449e-07	-2.03165	-0.247227	-2.27888	-1.103	0.012	-1.091	2020 Cancer Cell
								SRSF7	8.26321e-12	4.1316e-11	4.1316e-11	-0.962311	1.86052	0.898204	-0.988	1.925	0.937	2020 Cancer Cell
								SSRP1	2.68618e-10	9.86761e-10	9.86761e-10	-1.03586	0.994515	-0.0413469	-1.17	1.223	0.053	2020 Cancer Cell
								STAU1	2.14367e-13	1.67765e-12	1.67765e-12	-1.54639	0.942227	-0.604163	-1.613	1.139	-0.474	2020 Cancer Cell
								STRAP	0.000252795	0.000332139	0.000332139	-0.442569	1.57775	1.13518	-0.543	1.69	1.147	2020 Cancer Cell
								SUPT16H	2.41297e-10	9.04865e-10	9.04865e-10	-0.937138	1.14148	0.204347	-0.953	1.264	0.311	2020 Cancer Cell
								SYNCRIP	5.14697e-11	2.05879e-10	2.05879e-10	-0.707803	3.25874	2.55094	-0.702	3.297	2.595	2020 Cancer Cell
								TAF15	1.07642e-05	1.65604e-05	1.65604e-05	-0.38198	2.69902	2.31704	-0.417	2.761	2.344	2020 Cancer Cell
								TBL3	5.61917e-05	8.02739e-05	8.02739e-05	-1.7188	-0.834711	-2.55351	-0.932	-0.635	-1.567	2020 Cancer Cell
								TCOF1	9.91605e-10	3.1873e-09	3.1873e-09	-1.92826	-0.495124	-2.42339	-1.008	-0.352	-1.36	2020 Cancer Cell
								TCP1	1.87828e-12	1.2012e-11	1.2012e-11	-0.639981	2.38612	1.74614	-0.667	2.42	1.753	2020 Cancer Cell
								THRAP3	7.25414e-12	3.9568e-11	3.9568e-11	-3.51855	-2.49318	-6.01173	-6.1935	-1.204	-7.3975	2020 Cancer Cell
								TOP1	1.93527e-12	1.2012e-11	1.2012e-11	-1.06634	2.52279	1.45645	-1.003	2.528	1.525	2020 Cancer Cell
								TSR1	0.000628282	0.000802062	0.000802062	-2.22145	-0.893021	-3.11447	-1.051	-0.762	-1.813	2020 Cancer Cell
								U2AF1	0.000309029	0.000403081	0.000403081	-0.473479	0.82999	0.35651	-0.61	0.867	0.257	2020 Cancer Cell
								U2AF2	1.84222e-10	7.05531e-10	7.05531e-10	-0.631199	1.87855	1.24735	-0.543	1.852	1.309	2020 Cancer Cell
								U2SURP	2.70439e-08	6.49055e-08	6.49055e-08	-0.926738	2.30433	1.37759	-1.061	2.33	1.269	2020 Cancer Cell
								UHRF1	0.000117861	0.000161947	0.000161947	-5.35416	-5.2791	-10.6333	-13.822	-3.155	-16.977	2020 Cancer Cell
								UPF1	0.00429824	0.00502391	0.00502391	-0.361637	0.365392	0.0037551	-0.572	0.446	-0.126	2020 Cancer Cell
								USP10	6.65807e-07	1.26153e-06	1.26153e-06	-1.43009	-0.337608	-1.76769	-0.87	-0.213	-1.083	2020 Cancer Cell
								UTP14A	0.0795813	0.0857762	0.0857762	-0.25999	-0.56601	-0.826	1.309	-0.412	0.897	2020 Cancer Cell
								VARS	9.86052e-07	1.771e-06	1.771e-06	-0.690527	1.42569	0.735163	-0.644	1.483	0.839	2020 Cancer Cell
								VDAC2	1.84151e-06	3.12708e-06	3.12708e-06	-0.472707	2.38528	1.91257	-0.49	2.408	1.918	2020 Cancer Cell
								WDR3	2.42012e-07	5.00714e-07	5.00714e-07	-1.89227	-0.250959	-2.14322	-1.153	-0.433	-1.586	2020 Cancer Cell
								WDR36	6.39361e-05	8.99101e-05	8.99101e-05	-3.8	-1.02145	-4.82145	-1.609	-1.008	-2.617	2020 Cancer Cell
								XRN2	3.32623e-10	1.17396e-09	1.17396e-09	-0.989582	0.0349897	-0.954592	-0.954	0.254	-0.7	2020 Cancer Cell
								YBX1	0.000231238	0.000308317	0.000308317	-0.881084	2.10625	1.22516	-0.738	2.245	1.507	2020 Cancer Cell
								ZC3H11A	1.0017e-06	1.771e-06	1.771e-06	-7.68269	-3.91566	-11.5983	-14.734	-2.243	-16.977	2020 Cancer Cell
								ZC3H15	3.19891e-05	4.68183e-05	4.68183e-05	-2.28244	-1.29326	-3.57569	-1.171	-1.13	-2.301	2020 Cancer Cell
								ZC3HAV1	0.015687	0.0178713	0.0178713	-0.804333	-1.59732	-2.40165	-0.343	-1.79	-2.133	2020 Cancer Cell
								ZFR	1.61687e-05	2.4253e-05	2.4253e-05	-1.22681	-1.03591	-2.26271	-0.473	-1.1	-1.573	2020 Cancer Cell
								ZNF207	7.88355e-09	2.11797e-08	2.11797e-08	-1.11085	0.796887	-0.313959	-0.856	0.97	0.114	2020 Cancer Cell

## Sheet: Table S1d
Gene_ID	p value total	p Value CI	p Value CII
ABCF1	0.506895	0.988598	0.887274
ACIN1	0.54556	0.27626	0.0685629
ALYREF	0.984791	0.188392	0.218352
BUB3	0.398232	0.0358968	0.407854
C14orf166	0.308643	0.766866	0.778587
CCT3	0.159199	0.27626	0.452178
CCT4	0.332559	0.487687	0.953222
CCT6A	0.852393	0.382852	0.623377
CCT8	0.733398	0.840943	0.452076
CDC5L	0.0377557	0.864485	0.895716
CLTC	0.0380969	0.0484438	0.26994
CMAS	0.998278	0.96266	0.928271
CORO1A	0.120081	0.0634631	0.608598
DARS	0.545951	0.320235	0.307501
DDB1	0.694268	0.15124	0.572638
DDX1	0.843585	0.35123	0.932805
DDX17	0.736045	0.35123	0.130979
DDX18	0.999798	0.334673	0.866284
DDX21	0.862611	0.291388	0.0124724
DDX23	0.600947	0.134669	0.177806
DDX3X	0.362375	0.0358968	0.0634627
DDX46	0.451399	0.382852	0.303828
DDX5	0.378213	0.334673	0.0332642
DDX6	0.84758	0.188392	0.886464
DHX15	0.0404466	0.604895	0.0931085
DHX30	0.158076	0.35123	0.866916
DHX36	0.540869	0.487687	0.45974
DHX9	0.878437	0.96266	0.334275
DKC1	0.311487	0.398641	0.0273008
DNAJA3	0.454545	0.0484438	0.892474
DNMT1	0.0212996	0.792518	0.0551577
EEF1A1	0.0829613	0.00688928	0.721102
EEF1G	0.620835	0.527923	0.464986
EEF2	0.0824136	0.913076	0.583821
EIF2AK2	0.489542	0.334673	0.102198
EIF2S1	0.63802	0.890329	0.173885
EIF2S3	0.855002	0.188392	0.644887
EIF3D	0.608291	0.237093	0.687612
EIF3F	0.324372	0.334673	0.461
EIF4A1	0.355656	0.670267	0.119313
EIF5A	0.376513	0.0634631	0.424383
EIF5B	0.680137	0.0634631	0.987065
ELAVL1	0.737248	0.108131	0.159245
EMG1	0.766044	0.188392	0.367209
ENO1	0.170674	0.743533	0.283105
EZR	0.27505	0.0358968	0.862319
FAM98A	0.859378	0.96266	0.933314
FBL	0.56923	0.17618	0.859068
FUS	0.417778	0.0484438	0.238516
FXR1	0.223674	0.0175583	0.145229
G3BP2	0.321543	0.784032	0.372067
GNB2L1	0.169917	0.695611	0.0863921
GNL3	0.540528	0.291388	0.63946
GTPBP4	0.669107	0.468231	0.107156
HEATR1	0.995051	0.382852	0.376454
HIST1H1B	0.0667217	0.334673	0.834334
HNRNPA0	0.0596544	0.0175583	0.514961
HNRNPA1	0.353428	0.334673	0.274562
HNRNPA2B1	0.299978	0.0175583	0.625756
HNRNPA3	0.0532096	0.134669	0.200752
HNRNPAB	0.731449	0.382852	0.361275
HNRNPC	0.335475	0.35123	0.191955
HNRNPH1	0.29088	0.14537	0.61036
HNRNPK	0.346319	0.0358968	0.346114
HNRNPL	0.218663	0.17618	0.551595
HNRNPM	0.261928	0.575249	0.260013
HNRNPU	0.568143	0.0256619	0.19463
HNRNPUL1	0.290247	0.398641	0.407195
HNRNPUL2	0.809052	0.939018	0.238355
HSP90AB1	0.209589	0.237093	0.176686
IGF2BP1	0.0279051	0.237093	0.946643
IGF2BP3	0.519122	0.864485	0.364266
ILF2	0.0747027	0.291388	0.613818
ILF3	0.311468	0.766866	0.0321529
KPNB1	0.258064	0.101508	0.856195
LARP1	0.0654177	0.487687	0.790886
LARS	0.0864389	0.416634	0.262912
LBR	0.903312	0.27626	0.695321
LYAR	0.3993	0.35123	0.489664
MAP4	0.630097	0.939018	0.845793
MATR3	0.808422	0.0113795	0.343248
MCM3	0.172926	0.398641	0.315958
MCM5	0.646144	0.647271	0.0420986
MKI67	0.178609	0.864485	0.96094
MOV10	0.178053	0.334673	0.639712
MYBBP1A	0.408179	0.604895	0.657663
MYH9	0.357338	0.398641	0.639187
MYO1C	0.954973	0.188392	0.671712
NAT10	0.896025	0.188392	0.318034
NCL	0.152013	0.564568	0.701532
NCOA5	0.876079	0.35123	0.798484
NOL6	0.503993	0.864485	0.654409
NONO	0.466441	0.575249	0.0909885
NOP2	0.98724	0.291388	0.242821
NOP56	0.548279	0.0358968	0.399183
NOP58	0.0464151	0.0358968	0.145235
NPM1	0.345612	0.0634631	0.321494
PA2G4	0.952362	0.988598	0.132118
PABPC1	0.419165	0.320235	0.221024
PABPC4	0.671931	0.398641	0.0994836
PARP1	0.651654	0.0634631	0.772131
PCBP1	0.210782	0.27626	0.482442
PCBP2	0.383343	0.334673	0.00699508
PDCD11	0.246013	0.890329	0.277384
PFN1	0.0475121	0.0358968	0.165805
PGAM5	0.972351	0.223409	0.120739
PHGDH	0.858502	0.647271	0.927646
PLEC	0.5446	0.840943	0.749627
PLRG1	0.662284	0.237093	0.192759
PPP2R1A	0.243269	0.188392	0.935952
PRDX1	0.342872	0.939018	0.0722035
PRKDC	0.793961	0.913076	0.0478826
PRPF19	0.13684	0.00688928	0.959297
PRPF3	0.599267	0.334673	0.840135
PRPF4	0.328684	0.27626	0.951985
PRPF40A	0.286713	0.604895	0.980483
PRPF8	0.0589864	0.766866	0.802911
PSIP1	0.377329	0.0811029	0.171509
PTBP1	0.123495	0.237093	0.0177066
PWP2	0.438889	0.416634	0.182687
RAB7A	0.122602	0.766866	0.19907
RAC2	0.0229511	0.0358968	0.0854487
RALY	0.289513	0.237093	0.841065
RARS	0.0159125	0.291388	0.966296
RBBP4	0.517614	0.334673	0.943659
RBM14	0.573025	0.17618	0.441751
RBM15	0.108505	0.320235	0.0334137
RBM25	0.660832	0.988598	0.155802
RBM39	0.555798	0.0634631	0.999778
RBM4	0.317215	0.939018	0.0494783
RBMX	0.899985	0.743533	0.721594
RCC2	0.247972	0.717877	0.240584
RNASEH2C	0.388073	0.416634	0.186083
RUVBL2	0.551408	0.188392	0.596204
SAFB	0.178047	0.35123	0.789656
SART1	0.906493	0.0358968	0.120788
SART3	0.801876	0.0256619	0.638846
SERBP1	0.622335	0.0634631	0.269357
SFPQ	0.361593	0.0256619	0.000479222
SKIV2L2	0.898962	0.670267	0.925609
SLC25A5	0.800023	0.27626	0.827088
SMARCA4	0.0253598	0.451066	0.635544
SMARCA5	0.31479	0.0691848	0.190204
SND1	0.907406	0.382852	0.260013
SNRNP200	0.819206	0.17618	0.0186721
SNRPD1	0.511694	0.334673	0.372624
SNRPD2	0.476935	0.398641	0.825874
SNW1	0.691186	0.0358968	0.293371
SON	0.697229	0.188392	0.426247
SRP14	0.364083	0.416634	0.595489
SRPK1	0.766614	0.766866	0.542445
SRRM2	0.712238	0.291388	0.434058
SRSF1	0.605857	0.564568	0.268885
SRSF7	0.673516	0.543592	0.383446
SSRP1	0.0482962	0.543592	0.816519
STAU1	0.259513	0.188392	0.502194
STRAP	0.62339	0.939018	0.351209
SUPT16H	0.0549281	0.468231	0.175137
SYNCRIP	0.488296	0.291388	0.716319
TAF15	0.766151	0.0175583	0.67424
TARS	0.453012	0.211666	0.288225
TBL3	0.141002	0.890329	0.00643494
TCOF1	0.14891	0.398641	0.0821517
TCP1	0.170308	0.815091	0.918981
THRAP3	0.331381	0.0634631	0.190654
TOP1	0.579593	0.0634631	0.686869
TSR1	0.306037	0.766866	0.00869587
U2AF1	0.0673037	0.134669	0.108251
U2AF2	0.336201	0.0175583	0.817083
U2SURP	0.680353	0.0256619	0.104886
UPF1	0.389995	0.604895	0.524254
USP10	0.820011	0.35123	0.550229
UTP14A	0.593218	0.840943	0.734998
VARS	0.0614164	0.334673	0.056382
VDAC2	0.263959	0.223409	0.822451
WDR36	0.319941	0.237093	0.0395157
XRN2	0.679013	0.743533	0.303521
YBX1	0.995513	0.468231	0.0291489
ZC3H11A	0.596596	0.913076	0.622682
ZC3H15	0.0779453	0.416634	0.846608
ZC3HAV1	0.246189	0.0634631	0.17205
ZFR	0.282173	0.525004	0.98281
ZNF207	0.939839	0.482525	0.50139
