# Supplementary material for: The Association of R-Loop Binding Proteins Subtypes with CIN Implicates Therapeutic Strategies in Colorectal Cancer
Source: Cancers (Basel). 2022 Nov 15;14(22):5607. doi: 10.3390/cancers14225607 (PMC9688457; doi:10.3390/cancers14225607)
Supplement: Supplementary file 1 [file cancers-14-05607-s001.zip › Table S2.xlsx]

## Sheet: Description
Table S2: Clinical signatures and molecular features in CI and CII. Related to Figure 2, 3 and S3.
Sheet	Description
Table S2a	Clinical characteristics of 90 CRC patients in 2014 CPTAC CRC database.
Table S2b	Clinical characteristics of 98 CRC patients in 2019 CPTAC CRC database.
Table S2c	Mutation burden in two clusters in 2012 TCGA CRC patients .
Table S2d	Mutation burden in two clusters in 2019 CPTAC CRC patients .
Table S2e	276 DDR proteins expression in clusters CI and CII in 2014 CPTAC, 2019 CPTAC and 2020 Cancer cell CRC proteomic data.
Table S2f	Phosphorylation of Polymerase II (PORL2A) at S2/5 sites in two clusters in 2019 CPTAC CRC patients.
Table S2g	Phosphorylation of Polymerase II (PORL2A) at S2/5 sites in two clusters in 2020 Cancer cell CRC patients.
Table S2h	The GO biological process gene sets correlated with CI and CII clusters from the gene set enrichment analysis (GSEA) in 2014 CPTAC CRC database.
Table S2i	The GO biological process gene sets correlated with CI and CII clusters from the gene set enrichment analysis (GSEA) in 2019 CPTAC CRC database.
Table S2j	The GO biological process gene sets correlated with CI and CII clusters from the gene set enrichment analysis (GSEA) in 2020 Cancer cell CRC database.

## Sheet: Table S2a
TCGA.participant.ID	vital_status.demographic	OS_time2021	days_to_death	days_to_last_followup	days_to_last_known_alive	vital_status	OS_status	OS_time	Chemotherapy_status	Removed.duplicate	Shotgun	Exome.Seq	AgilentArray	Methylation	CNV	RPPA	RNA.Seq	miRNA.Seq	Gender	Cancer	Histological.type	Tumor.site	Anatomic.organ.subdivision	Tumor.stage	Hypermutated	Hypermutated2	MSI_status	MSI.status	Methylation.subtype	Transcriptomic.subtype	MLH1_silencing	silent_mutrate	nonsilent_mutrate	Age	distant_metastasis_pathologic_spread	history_of_colon_polyps	icd_o_3_histology	icd_o_3_site	lymphatic_invasion_present	lymphnode_pathologic_spread	lymphnodes_examined	number_of_first_degree_relatives_with_cancer_diagnosis	number_of_lymphnodes_examined	number_of_lymphnodes_positive_by_he	person_neoplasm_cancer_status	preoperative_pretreatment_cea_level	primary_tumor_pathologic_spread	prior_diagnosis	residual_tumor
TCGA-A6-3807	Alive	1054	#N/A	332	332	LIVING	0	332	2	0	1	1	1	1	1	1	1	1	Female	Colon	Colon Adenocarcinoma	3 - left colon	Sigmoid Colon	Stage IIIC	1	Non-Hyp	1	MSS	Cluster4	MSI/CIMP	0	0.739	2.79	53	M0	NO	Mar-40	C18.7	YES	N2	YES	0	24	5	TUMOR FREE	45	T3	NO	R0
TCGA-A6-3808	Alive	1014	#N/A	278	278	LIVING	0	278	2	0	1	1	1	1	0	1	1	1	Male	Colon	Colon Mucinous Adenocarcinoma	1 - right colon	Cecum	Stage IIA	1	Non-Hyp	2	MSI-L	Cluster3	MSI/CIMP	0	0.778	3.45	73	M0	YES	Mar-40	C18.2	NO	N0	YES	0	24	0	TUMOR FREE	#N/A	T3	NO	R0
TCGA-A6-3810	Alive	1111	#N/A	246	246	LIVING	0	246	2	0	1	1	1	1	1	1	1	1	Male	Colon	Colon Adenocarcinoma	3 - left colon	Sigmoid Colon	Stage IIA	1	Non-Hyp	1	MSS	Cluster4	MSI/CIMP	0	0.927	3.3	62	M0	YES	Mar-40	C18.7	NO	N0	YES	0	30	0	TUMOR FREE	1.7	T3	NO	R0
TCGA-AA-3518	Alive	31	#N/A	31	31	LIVING	0	31	2	0	1	1	1	1	1	0	1	1	Female	Colon	Colon Adenocarcinoma	1 - right colon	Cecum	Stage IIA	2	Hyp	2	MSI-H	CIMP.H	MSI/CIMP	1	7.15	19.5	81	M0	NO	Mar-40	C18.0	NO	N0	YES	0	27	0	WITH TUMOR	1.48	T3	NO	R0
TCGA-AA-3525	Alive	1	#N/A	0	31	LIVING	0	31	2	0	1	1	1	1	1	1	1	1	Male	Colon	Colon Adenocarcinoma	1 - right colon	Hepatic Flexure	Stage IIIB	2	Hyp	2	MSI-H	CIMP.H	MSI/CIMP	1	8.25	24.3	90	M0	NO	Mar-40	C18.3	NO	N1	YES	0	28	2	WITH TUMOR	#N/A	T3	YES	R0
TCGA-AA-3526	Alive	580	#N/A	30	30	LIVING	0	30	2	0	1	1	1	1	1	0	0	1	Male	Colon	Colon Adenocarcinoma	3 - left colon	Sigmoid Colon	Stage I	1	Non-Hyp	2	MSI-L	Cluster3	MSI/CIMP	0	1.05	2.21	57	M0	YES	Mar-40	C18.7	NO	N0	YES	2	17	0	WITH TUMOR	2.06	T2	NO	R0
TCGA-AA-3529	Dead	0	0	0	0	DECEASED	1	0	2	0	1	1	1	1	1	1	1	1	Female	Colon	Colon Adenocarcinoma	3 - left colon	Sigmoid Colon	Stage IIIC	1	Non-Hyp	2	MSI-L	Cluster4	CIN	0	1	2.11	78	M0	NO	Mar-40	C18.7	YES	N2	YES	0	34	10	WITH TUMOR	17.3	T3	NO	R0
TCGA-AA-3531	Alive	1035	#N/A	0	0	LIVING	0	0	2	0	1	1	1	1	1	1	1	1	Female	Colon	Colon Adenocarcinoma	3 - left colon	Sigmoid Colon	Stage IIA	1	Non-Hyp	2	MSI-L	Cluster4	CIN	0	0.701	2.27	75	M0	NO	Mar-40	C18.7	NO	N0	YES	0	37	0	WITH TUMOR	0.65	T3	YES	R0
TCGA-AA-3534	Alive	882	#N/A	0	30	LIVING	0	30	2	0	1	1	1	1	1	1	1	1	Female	Colon	Colon Adenocarcinoma	1 - right colon	Ascending Colon	Stage IIA	1	Non-Hyp	1	MSS	Cluster3	CIN	0	0.563	2.17	78	M0	YES	Mar-40	C18.2	YES	N0	YES	1	36	0	WITH TUMOR	1.56	T3	NO	R0
TCGA-AA-3552	Dead	396	#N/A	0	61	LIVING	0	61	2	0	1	1	1	1	1	1	1	1	Male	Colon	Colon Adenocarcinoma	1 - right colon	Cecum	Stage IIIC	1	Non-Hyp	1	MSS	Cluster3	Invasive	0	0.717	1.77	85	M0	NO	Mar-40	C18.0	YES	N2	YES	0	20	10	WITH TUMOR	2.71	T3	YES	R0
TCGA-AA-3554	Alive	546	#N/A	0	0	LIVING	0	0	2	0	1	1	1	1	1	1	1	1	Female	Colon	Colon Adenocarcinoma	1 - right colon	Ascending Colon	Stage IIA	2	Hyp	2	MSI-H	Cluster4	MSI/CIMP	0	4.33	12	62	M0	YES	Mar-40	C18.2	NO	N0	YES	3	39	0	WITH TUMOR	#N/A	T3	YES	R0
TCGA-AA-3558	Alive	638	#N/A	0	30	LIVING	0	30	2	0	1	1	1	1	1	1	0	1	Male	Colon	Colon Adenocarcinoma	3 - left colon	Sigmoid Colon	#N/A	1	Non-Hyp	1	MSS	CIMP.L	Invasive	0	1.64	3.78	70	#N/A	NO	Mar-40	C18.7	NO	N0	YES	0	46	0	WITH TUMOR	#N/A	T2	NO	R2
TCGA-AA-3561	Alive	424	#N/A	0	31	LIVING	0	31	2	0	1	1	1	1	1	1	1	1	Male	Colon	Colon Adenocarcinoma	1 - right colon	Ascending Colon	Stage IIA	1	Non-Hyp	1	MSS	Cluster3	Invasive	0	1.01	1.57	72	M0	YES	Mar-40	C18.2	NO	N0	YES	0	50	#N/A	WITH TUMOR	#N/A	T3	NO	R0
TCGA-AA-3664	Alive	1643	#N/A	0	0	LIVING	0	0	2	0	1	1	1	1	1	1	1	1	Female	Colon	Colon Adenocarcinoma	1 - right colon	Cecum	Stage IIA	1	Non-Hyp	1	MSS	CIMP.H	MSI/CIMP	1	1.5	4.53	74	M0	NO	Mar-40	C18.0	NO	N0	YES	0	22	0	WITH TUMOR	4.22	T3	NO	R0
TCGA-AA-3666	Dead	61	61	31	61	DECEASED	1	61	2	0	1	1	1	1	1	0	1	1	Male	Colon	Colon Adenocarcinoma	1 - right colon	Cecum	Stage IIIB	1	Non-Hyp	1	MSS	Cluster4	Invasive	0	0.827	5.37	68	M0	NO	Mar-40	C18.0	NO	N1	YES	0	41	2	WITH TUMOR	41.6	T3	NO	R0
TCGA-AA-3672	Alive	0	#N/A	0	28	LIVING	0	28	2	0	1	1	1	1	1	1	1	1	Female	Colon	Colon Adenocarcinoma	2 - transverse colon	Transverse Colon	Stage IIIB	2	Hyp	2	MSI-H	CIMP.H	MSI/CIMP	1	18.1	52.3	90	M0	NO	Mar-40	C18.4	NO	N1	YES	0	21	4	WITH TUMOR	1.27	T3	YES	R0
TCGA-AA-3684	Alive	0	#N/A	0	0	LIVING	0	0	2	0	1	1	1	1	1	0	1	1	Female	Colon	Colon Mucinous Adenocarcinoma	1 - right colon	Cecum	Stage IV	1	Non-Hyp	1	MSS	CIMP.L	MSI/CIMP	0	1.17	3.47	65	M1	YES	Mar-80	C18.0	YES	N2	YES	0	10	9	WITH TUMOR	2.28	#N/A	NO	R2
TCGA-AA-3695	Alive	0	#N/A	0	31	LIVING	0	31	2	0	1	1	1	1	1	1	1	1	Female	Colon	Colon Adenocarcinoma	1 - right colon	Cecum	Stage IV	1	Non-Hyp	1	MSS	CIMP.L	CIN	0	1.74	5.06	63	M1	YES	Mar-40	C18.0	YES	N2	YES	0	33	6	WITH TUMOR	#N/A	T3	NO	R2
TCGA-AA-3710	Alive	821	#N/A	31	31	LIVING	0	31	2	0	1	1	1	1	1	1	1	1	Female	Colon	Colon Adenocarcinoma	1 - right colon	Hepatic Flexure	Stage IIA	2	Hyp	2	MSI-H	CIMP.H	MSI/CIMP	1	13.4	34.3	80	M0	NO	Mar-40	C18.3	YES	N0	YES	0	20	0	WITH TUMOR	5.12	T3	NO	R0
TCGA-AA-3715	Dead	579	#N/A	30	30	LIVING	0	30	2	0	1	1	1	1	1	1	1	1	Male	Colon	Colon Adenocarcinoma	1 - right colon	Ascending Colon	Stage IIA	2	Hyp	2	MSI-H	CIMP.H	MSI/CIMP	1	17.8	54.2	77	M0	YES	Mar-40	C18.2	YES	N0	YES	0	12	0	WITH TUMOR	7.05	T3	YES	R0
TCGA-AA-3818	Dead	30	30	0	30	DECEASED	1	30	2	0	1	1	1	1	1	1	1	1	Female	Colon	Colon Adenocarcinoma	1 - right colon	Hepatic Flexure	Stage IIA	1	Non-Hyp	1	MSS	CIMP.L	Invasive	0	1.37	3.71	78	M0	NO	Mar-40	C18.3	NO	N0	YES	0	18	0	WITH TUMOR	3.79	T3	NO	R0
TCGA-AA-3848	Dead	306	#N/A	30	30	LIVING	0	30	2	0	1	1	1	1	1	1	1	1	Female	Colon	Colon Adenocarcinoma	3 - left colon	Sigmoid Colon	Stage IIIC	1	Non-Hyp	1	MSS	CIMP.L	CIN	0	1.86	3.81	82	M0	YES	Mar-40	C18.7	YES	N2	YES	0	12	6	WITH TUMOR	#N/A	T3	NO	R0
TCGA-AA-3864	Alive	1612	#N/A	0	30	LIVING	0	30	2	0	1	1	1	1	1	1	1	1	Male	Colon	Colon Adenocarcinoma	1 - right colon	Cecum	Stage IIA	2	Hyp	2	MSI-H	Cluster3	MSI/CIMP	0	26.3	65.1	71	M0	NO	Mar-40	C18.0	NO	N0	YES	0	21	0	WITH TUMOR	3.12	T3	NO	R0
TCGA-AA-3986	Alive	580	#N/A	30	30	LIVING	0	30	1	0	1	1	1	1	1	1	1	1	Male	Colon	Colon Adenocarcinoma	2 - transverse colon	Transverse Colon	Stage I	1	Non-Hyp	1	MSS	Cluster3	Invasive	0	0.874	2	73	M0	YES	Mar-40	C18.4	NO	N0	YES	0	27	0	WITH TUMOR	1.89	T2	YES	R0
TCGA-AA-3989	Dead	242	#N/A	0	30	LIVING	0	30	1	0	1	1	1	1	1	1	1	1	Male	Colon	Colon Adenocarcinoma	2 - transverse colon	Transverse Colon	Stage IV	1	Non-Hyp	1	MSS	CIMP.L	Invasive	0	0.911	3.24	84	M1	YES	Mar-40	C18.4	YES	N2	YES	0	19	5	WITH TUMOR	#N/A	T3	NO	R2
TCGA-AA-A004	Alive	424	#N/A	424	424	LIVING	0	424	1	0	1	1	1	1	1	0	1	0	Male	Colon	Colon Adenocarcinoma	3 - left colon	Sigmoid Colon	Stage IIA	1	Non-Hyp	2	MSI-L	CIMP.L	MSI/CIMP	0	0.674	2.54	76	M0	YES	Mar-40	C18.7	NO	N0	YES	0	32	0	WITH TUMOR	#N/A	T3	NO	R0
TCGA-AA-A00A	Alive	1157	#N/A	548	548	LIVING	0	548	2	1	1	1	1	1	1	0	1	0	Male	Colon	Colon Adenocarcinoma	1 - right colon	Ascending Colon	Stage IIA	2	Hyp	2	MSI-H	CIMP.H	MSI/CIMP	0	5.52	16.1	80	M0	NO	Mar-40	C18.2	NO	N0	YES	0	34	0	WITH TUMOR	#N/A	T3	NO	R0
TCGA-AA-A00E	Alive	913	#N/A	913	913	LIVING	0	913	2	0	1	1	1	1	1	0	1	0	Male	Colon	Colon Adenocarcinoma	1 - right colon	Ascending Colon	Stage IIA	2	Hyp	2	MSI-H	CIMP.H	MSI/CIMP	1	8.7	23	65	M0	NO	Mar-40	C18.2	NO	N0	YES	0	41	0	WITH TUMOR	10.56	T3	NO	R0
TCGA-AA-A00F	Alive	1035	#N/A	1035	1035	LIVING	0	1035	2	0	1	1	1	1	1	0	1	0	Male	Colon	Colon Adenocarcinoma	3 - left colon	Sigmoid Colon	Stage IIIC	1	Non-Hyp	1	MSS	Cluster3	CIN	0	0.543	1.34	66	M0	NO	Mar-40	C18.7	YES	N2	YES	0	25	7	WITH TUMOR	2.93	T3	NO	R0
TCGA-AA-A00J	Alive	549	#N/A	548	548	LIVING	0	548	2	0	1	1	1	1	1	0	1	1	Male	Colon	Colon Mucinous Adenocarcinoma	1 - right colon	Ascending Colon	Stage IIIB	2	Hyp	2	MSI-H	CIMP.H	MSI/CIMP	1	12.9	38.6	80	M0	YES	Mar-80	#N/A	YES	N1	YES	0	24	2	WITH TUMOR	#N/A	#N/A	NO	R0
TCGA-AA-A00K	Alive	549	#N/A	548	548	LIVING	0	548	2	1	1	1	1	1	1	0	1	0	Male	Colon	Colon Adenocarcinoma	3 - left colon	Sigmoid Colon	Stage IIA	1	Non-Hyp	2	MSI-L	Cluster3	Invasive	0	2.18	3.74	79	M0	NO	Mar-40	C18.7	NO	N0	YES	0	55	0	WITH TUMOR	#N/A	T3	NO	R0
TCGA-AA-A00N	Dead	122	122	122	122	DECEASED	1	122	2	1	1	1	1	1	1	0	1	0	Male	Colon	Colon Mucinous Adenocarcinoma	1 - right colon	Cecum	Stage IIB	2	Hyp	2	MSI-L	Cluster4	MSI/CIMP	0	40.8	152	75	M0	YES	Mar-80	C18.0	YES	N0	YES	0	21	0	WITH TUMOR	9.01	#N/A	NO	R0
TCGA-AA-A00O	Alive	822	#N/A	822	822	LIVING	0	822	2	0	1	1	1	1	1	0	1	1	Female	Colon	Colon Adenocarcinoma	3 - left colon	Sigmoid Colon	Stage IIIC	1	Non-Hyp	2	MSI-L	Cluster4	CIN	0	0.957	2.77	83	M0	NO	Mar-40	C18.7	YES	N2	YES	0	40	32	WITH TUMOR	3.25	T3	NO	R0
TCGA-AA-A00R	Alive	30	#N/A	30	30	LIVING	0	30	2	1	1	1	1	1	1	0	1	0	Female	Colon	Colon Adenocarcinoma	1 - right colon	Cecum	Stage I	2	Hyp	2	MSI-H	CIMP.L	MSI/CIMP	1	6.76	14.9	64	M0	YES	Mar-40	C18.0	NO	N0	YES	3	27	0	WITH TUMOR	0.34	T2	NO	R0
TCGA-AA-A00U	Alive	518	#N/A	517	517	LIVING	0	517	1	0	1	1	1	1	1	0	1	1	Male	Colon	Colon Adenocarcinoma	1 - right colon	Ascending Colon	Stage IIIB	1	Non-Hyp	1	MSS	CIMP.L	Invasive	0	0.953	2.65	50	M0	YES	Mar-40	C18.2	NO	N1	YES	0	0	0	WITH TUMOR	#N/A	T3	NO	R0
TCGA-AA-A010	Alive	1064	#N/A	638	638	LIVING	0	638	1	0	1	0	1	1	1	0	1	1	Female	Colon	Colon Adenocarcinoma	2 - transverse colon	Transverse Colon	Stage IIB	2	Hyp	2	MSI-L	Cluster4	MSI/CIMP	0	67.5	262	46	M0	NO	Mar-40	C18.4	NO	N0	YES	0	45	0	WITH TUMOR	0.2	#N/A	NO	R0
TCGA-AA-A017	Alive	457	#N/A	457	457	LIVING	0	457	1	0	1	1	1	1	1	0	1	0	Female	Colon	Colon Adenocarcinoma	3 - left colon	Sigmoid Colon	Stage IIA	1	Non-Hyp	1	MSS	Cluster4	CIN	0	0.76	2.28	57	M0	NO	Mar-40	C18.7	YES	N0	YES	0	18	0	WITH TUMOR	#N/A	T3	NO	R0
TCGA-AA-A01C	Alive	457	#N/A	457	457	LIVING	0	457	2	0	1	1	1	1	1	0	1	0	Male	Colon	Colon Adenocarcinoma	1 - right colon	Ascending Colon	Stage IIIA	#N/A	#N/A	1	MSS	Cluster4	CIN	0	#N/A	#N/A	75	M0	YES	Mar-40	C18.2	YES	N1	YES	0	31	3	WITH TUMOR	#N/A	T2	NO	R0
TCGA-AA-A01D	Dead	334	#N/A	30	30	LIVING	0	30	2	0	1	0	1	1	1	0	1	1	Female	Colon	Colon Mucinous Adenocarcinoma	3 - left colon	Sigmoid Colon	Stage IIIC	1	Non-Hyp	1	MSS	CIMP.L	MSI/CIMP	0	2.02	5.64	47	M0	NO	Mar-80	C19.9	YES	N2	YES	0	12	12	WITH TUMOR	#N/A	T3	NO	R0
TCGA-AA-A01F	Alive	974	#N/A	396	396	LIVING	0	396	2	0	1	1	1	1	1	0	1	1	Male	Colon	Colon Adenocarcinoma	3 - left colon	Sigmoid Colon	Stage IIIB	1	Non-Hyp	1	MSS	Cluster3	CIN	0	0.506	1.98	72	M0	YES	Mar-40	C18.7	YES	N1	YES	0	30	2	WITH TUMOR	#N/A	T3	NO	R0
TCGA-AA-A01I	Alive	943	#N/A	365	365	LIVING	0	365	2	0	1	1	1	1	1	0	1	0	Male	Colon	Colon Adenocarcinoma	3 - left colon	Sigmoid Colon	Stage I	1	Non-Hyp	1	MSS	CIMP.L	Invasive	0	0.637	3.62	76	M0	YES	Mar-40	C18.7	NO	N0	YES	0	36	0	WITH TUMOR	#N/A	T2	NO	R0
TCGA-AA-A01K	Alive	943	#N/A	396	396	LIVING	0	396	2	0	1	0	1	1	1	0	1	0	Female	Colon	Colon Adenocarcinoma	3 - left colon	Sigmoid Colon	Stage IIIC	1	Non-Hyp	1	MSS	Cluster3	MSI/CIMP	0	1.73	5.58	74	M0	NO	Mar-40	C18.7	YES	N2	YES	0	35	4	WITH TUMOR	#N/A	T3	NO	R0
TCGA-AA-A01P	Dead	1158	1158	1158	1158	DECEASED	1	1158	2	0	1	1	0	1	1	0	1	1	Female	Colon	Colon Adenocarcinoma	1 - right colon	Ascending Colon	Stage IIIB	2	Hyp	2	MSI-H	CIMP.H	#N/A	1	4.99	14.6	80	M0	NO	Mar-40	C18.2	YES	N1	YES	0	21	1	WITH TUMOR	1.11	T3	NO	R0
TCGA-AA-A01R	Alive	1065	#N/A	1065	1065	LIVING	0	1065	2	0	1	1	0	1	1	0	1	1	Male	Colon	Colon Mucinous Adenocarcinoma	1 - right colon	Ascending Colon	Stage IIIB	2	Hyp	2	MSI-H	CIMP.L	#N/A	0	16.5	40.5	47	M0	NO	Mar-80	C18.2	YES	N2	YES	1	19	9	WITH TUMOR	1.83	T3	NO	R0
TCGA-AA-A01S	Alive	31	#N/A	31	31	LIVING	0	31	2	0	1	1	0	1	1	0	1	1	Female	Colon	Colon Adenocarcinoma	3 - left colon	Sigmoid Colon	Stage IIIB	1	Non-Hyp	2	MSI-L	Cluster4	#N/A	1	0.65	1.52	47	M0	NO	Mar-40	C18.7	#N/A	N1	YES	0	19	1	WITH TUMOR	0.82	T3	NO	R0
TCGA-AA-A01T	Alive	1005	#N/A	1005	1005	LIVING	0	1005	2	0	1	1	0	1	1	0	1	1	Female	Colon	Colon Adenocarcinoma	3 - left colon	Sigmoid Colon	Stage IIIB	1	Non-Hyp	1	MSS	Cluster3	#N/A	0	0.608	2.68	63	M0	NO	Mar-40	C18.7	YES	N1	YES	0	15	1	WITH TUMOR	0.7	T3	NO	R0
TCGA-AA-A01V	Alive	31	#N/A	1065	1065	LIVING	0	1065	2	0	1	1	0	1	1	0	1	1	Male	Colon	Colon Adenocarcinoma	1 - right colon	Cecum	Stage I	1	Non-Hyp	1	MSS	CIMP.L	#N/A	0	1.37	3.16	59	M0	NO	Mar-40	C18.0	#N/A	N0	YES	0	15	0	WITH TUMOR	4.09	T2	NO	R0
TCGA-AA-A01X	Alive	791	#N/A	791	791	LIVING	0	791	2	0	1	1	0	1	1	0	1	1	Female	Colon	Colon Adenocarcinoma	3 - left colon	Sigmoid Colon	Stage IIIA	1	Non-Hyp	1	MSS	Cluster3	#N/A	0	0.61	1.54	80	M0	YES	Mar-40	C18.7	YES	N1	YES	0	14	2	WITH TUMOR	11.08	T2	NO	RX
TCGA-AA-A01Z	Alive	1126	#N/A	638	638	LIVING	0	638	2	0	1	1	0	1	1	0	1	1	Male	Colon	Colon Adenocarcinoma	1 - right colon	Ascending Colon	Stage IIA	1	Non-Hyp	1	MSS	CIMP.L	#N/A	0	1.12	2.94	68	M0	YES	Mar-40	C18.2	YES	N0	YES	0	12	0	WITH TUMOR	18.87	T3	NO	R0
TCGA-AA-A022	Alive	0	#N/A	0	0	LIVING	0	0	2	0	1	1	0	1	1	0	1	1	Female	Colon	Colon Adenocarcinoma	1 - right colon	Cecum	#N/A	2	Hyp	2	MSI-H	CIMP.H	#N/A	1	11.8	30.3	88	M0	NO	Mar-40	C18.0	YES	N0	YES	0	18	0	WITH TUMOR	1.51	#N/A	NO	R0
TCGA-AA-A024	Dead	1188	1188	1188	1188	DECEASED	1	1188	2	0	1	0	1	1	1	0	1	1	Male	Colon	Colon Mucinous Adenocarcinoma	3 - left colon	Descending Colon	Stage IIA	1	Non-Hyp	2	MSI-L	Cluster3	Invasive	0	1.23	2.9	81	M0	NO	Nov-40	C18.6	#N/A	N0	YES	0	14	0	WITH TUMOR	3.77	T3	YES	R0
TCGA-AA-A029	Alive	1581	#N/A	1580	1580	LIVING	0	1580	2	0	1	0	1	1	1	0	1	1	Male	Colon	Colon Adenocarcinoma	1 - right colon	Cecum	Stage IIA	1	Non-Hyp	2	MSI-L	CIMP.H	Invasive	0	1.32	3.75	67	M0	YES	Mar-40	C18.0	#N/A	N0	YES	0	27	0	WITH TUMOR	1.97	T3	NO	R0
TCGA-AA-A02E	Dead	90	89	89	89	DECEASED	1	89	2	0	1	1	1	1	1	0	1	1	Female	Colon	Colon Adenocarcinoma	1 - right colon	Cecum	Stage IV	#N/A	#N/A	2	MSI-L	Cluster3	CIN	0	#N/A	#N/A	82	M1	NO	Mar-40	C18.0	YES	N1	YES	0	16	4	WITH TUMOR	441.9	T3	NO	R2
TCGA-AA-A02H	Dead	61	61	61	61	DECEASED	1	61	2	0	1	0	1	1	1	0	1	1	Female	Colon	Colon Adenocarcinoma	3 - left colon	Sigmoid Colon	Stage IV	1	Non-Hyp	1	MSS	Cluster3	CIN	0	0.729	2.53	74	M1	NO	Mar-40	C18.7	YES	N2	YES	0	12	6	WITH TUMOR	1387	T3	NO	R2
TCGA-AA-A02J	Dead	153	153	153	153	DECEASED	1	153	2	0	1	1	1	1	1	0	1	1	Female	Colon	Colon Adenocarcinoma	3 - left colon	Sigmoid Colon	Stage IV	1	Non-Hyp	1	MSS	Cluster4	CIN	0	1.33	4.43	70	M1	NO	Mar-40	C18.7	YES	N0	YES	1	13	0	WITH TUMOR	96.57	T3	NO	R2
TCGA-AA-A02O	Alive	28	#N/A	28	28	LIVING	0	28	2	0	1	1	0	1	1	0	1	1	Male	Colon	Colon Adenocarcinoma	2 - transverse colon	Transverse Colon	Stage IIA	1	Non-Hyp	1	MSS	CIMP.H	#N/A	0	0.91	4.44	82	M0	NO	Mar-40	C18.4	YES	N0	YES	0	18	0	WITH TUMOR	5.97	T3	NO	R0
TCGA-AA-A02R	Dead	670	670	670	670	DECEASED	1	670	2	0	1	0	1	1	1	0	1	1	Female	Colon	Colon Adenocarcinoma	1 - right colon	Cecum	Stage IIA	#N/A	#N/A	2	MSI-H	CIMP.H	MSI/CIMP	1	#N/A	#N/A	84	M0	NO	Mar-40	C18.0	YES	N0	YES	0	18	0	WITH TUMOR	2.67	T3	NO	R0
TCGA-AA-A02Y	Alive	1216	#N/A	1215	1215	LIVING	0	1215	2	0	1	1	0	1	1	0	0	1	Male	Colon	Colon Adenocarcinoma	1 - right colon	Cecum	Stage I	1	Non-Hyp	1	MSS	CIMP.L	#N/A	0	0.705	3.42	73	M0	NO	Mar-40	C18.0	YES	N0	YES	0	18	0	WITH TUMOR	0.98	T2	NO	R0
TCGA-AA-A03F	Dead	0	548	548	548	DECEASED	1	548	2	0	1	1	0	1	1	0	1	1	Female	Colon	Colon Mucinous Adenocarcinoma	1 - right colon	Cecum	Stage IIIB	1	Non-Hyp	1	MSS	CIMP.H	#N/A	0	1.04	3.46	90	M0	NO	Mar-80	C18.0	#N/A	N2	YES	0	29	4	WITH TUMOR	1.09	T3	NO	R0
TCGA-AA-A03J	Alive	1246	#N/A	1245	1245	LIVING	0	1245	2	0	1	1	0	1	1	0	1	1	Female	Colon	Colon Adenocarcinoma	3 - left colon	Sigmoid Colon	Stage I	1	Non-Hyp	1	MSS	CIMP.L	#N/A	0	1.02	2.19	65	M0	YES	Mar-40	C18.7	#N/A	N0	YES	1	34	0	WITH TUMOR	2.09	T2	NO	R0
TCGA-AF-2691	#N/A	#N/A	#N/A	323	323	LIVING	0	323	2	0	1	1	1	1	1	0	1	1	Female	Rectum	Rectal Adenocarcinoma	4 - rectum	Rectum	Stage I	1	Non-Hyp	1	MSS	CIMP.L	Invasive	0	0.607	2.71	48	M0	NO	Mar-40	C19.9	NO	N0	YES	0	17	0	TUMOR FREE	1.3	T1	NO	R0
TCGA-AF-2692	#N/A	#N/A	#N/A	412	412	LIVING	0	412	2	0	1	1	1	1	1	0	1	1	Female	Rectum	#N/A	4 - rectum	#N/A	Stage IIA	1	Non-Hyp	1	MSS	Cluster4	CIN	0	0.428	1.2	54	M0	NO	#N/A	C18.7	NO	N0	YES	0	12	0	WITH TUMOR	10.6	T3	NO	R0
TCGA-AF-3400	#N/A	#N/A	#N/A	387	387	LIVING	0	387	2	0	1	1	1	1	1	1	1	1	Male	Rectum	Rectal Mucinous Adenocarcinoma	4 - rectum	Rectosigmoid Junction	Stage IIA	1	Non-Hyp	1	MSS	Cluster4	MSI/CIMP	0	0.586	0.77	54	M0	NO	Mar-80	C19.9	NO	N0	YES	1	32	0	TUMOR FREE	2.8	T3	NO	R0
TCGA-AF-3913	Dead	316	316	316	316	DECEASED	1	316	2	0	1	1	1	1	1	1	1	1	Male	Rectum	Rectal Adenocarcinoma	4 - rectum	Rectosigmoid Junction	Stage IV	1	Non-Hyp	1	MSS	Cluster4	CIN	0	0.99	2.93	60	M1	NO	Mar-40	C19.9	YES	N1a	YES	#N/A	26	1	WITH TUMOR	41.5	T3	YES	R0
TCGA-AG-3574	#N/A	#N/A	#N/A	0	30	LIVING	0	30	2	0	1	1	1	1	1	1	1	1	Female	Rectum	Rectal Adenocarcinoma	4 - rectum	Rectum	Stage IIA	1	Non-Hyp	1	MSS	Cluster3	CIN	0	0.549	1.37	89	M0	YES	Mar-40	C20.9	NO	N0	YES	0	18	#N/A	WITH TUMOR	4.59	T3	NO	R0
TCGA-AG-3580	#N/A	#N/A	#N/A	0	0	LIVING	0	0	2	0	1	1	1	1	1	1	1	1	Male	Rectum	Rectal Adenocarcinoma	4 - rectum	Rectum	Stage I	1	Non-Hyp	1	MSS	Cluster3	Invasive	0	0.466	1.36	67	M0	YES	Mar-40	C20.9	NO	N0	YES	0	22	0	WITH TUMOR	0.87	T1	YES	R0
TCGA-AG-3584	#N/A	#N/A	#N/A	0	0	LIVING	0	0	2	0	1	1	1	1	1	1	1	1	Male	Rectum	Rectal Adenocarcinoma	4 - rectum	Rectum	Stage IV	1	Non-Hyp	1	MSS	CIMP.L	CIN	0	0.218	1.26	60	M1	NO	Mar-40	C20.9	YES	N2	YES	0	34	20	WITH TUMOR	36.7	T3	NO	R2
TCGA-AG-3593	#N/A	#N/A	#N/A	0	30	LIVING	0	30	2	0	1	1	1	1	1	1	1	1	Female	Rectum	Rectal Adenocarcinoma	4 - rectum	Rectum	Stage IIA	1	Non-Hyp	1	MSS	Cluster3	CIN	0	0.824	2.7	72	M0	NO	Mar-40	C20.9	NO	N0	YES	0	38	0	WITH TUMOR	9.76	T3	NO	R0
TCGA-AG-3594	#N/A	#N/A	#N/A	0	31	LIVING	0	31	2	0	1	1	1	1	1	1	1	1	Male	Rectum	Rectal Mucinous Adenocarcinoma	4 - rectum	Rectum	Stage IIA	1	Non-Hyp	1	MSS	Cluster3	MSI/CIMP	0	0.629	1.26	77	M0	YES	Mar-80	C20.9	NO	N0	YES	0	25	0	WITH TUMOR	2.99	T3	NO	R0
TCGA-AG-4007	#N/A	#N/A	#N/A	31	31	LIVING	0	31	2	0	1	1	1	1	1	1	1	1	Male	Rectum	Rectal Adenocarcinoma	4 - rectum	Rectum	Stage IV	1	Non-Hyp	2	MSI-L	CIMP.L	CIN	0	1.38	4.68	87	M1	NO	Mar-40	C20.9	YES	N2	YES	0	34	5	WITH TUMOR	3.65	#N/A	NO	R2
TCGA-AG-A002	#N/A	#N/A	#N/A	637	637	LIVING	0	637	2	0	1	1	1	1	1	1	1	1	Male	Rectum	Rectal Adenocarcinoma	4 - rectum	Rectum	Stage I	2	Hyp	1	MSS	Cluster3	MSI/CIMP	0	92.7	372	35	M0	NO	Mar-40	C20.9	#N/A	N0	YES	0	34	0	WITH TUMOR	#N/A	T2	NO	R0
TCGA-AG-A008	#N/A	#N/A	#N/A	423	423	LIVING	0	423	2	0	1	1	1	1	1	1	1	1	Female	Rectum	Rectal Mucinous Adenocarcinoma	4 - rectum	Rectum	Stage I	1	Non-Hyp	1	MSS	Cluster4	Invasive	0	0.434	1.69	50	M0	YES	Mar-80	C20.9	NO	N0	YES	0	28	0	WITH TUMOR	#N/A	T2	NO	R0
TCGA-AG-A00C	#N/A	#N/A	#N/A	183	183	LIVING	0	183	2	0	1	1	1	1	1	1	1	1	Female	Rectum	Rectal Adenocarcinoma	4 - rectum	Rectum	Stage IIIB	1	Non-Hyp	1	MSS	Cluster3	Invasive	0	0.772	2.27	49	M0	NO	Mar-40	C20.9	YES	N1	YES	0	24	1	WITH TUMOR	4.31	T3	NO	R0
TCGA-AG-A00H	#N/A	#N/A	#N/A	789	789	LIVING	0	789	2	1	1	0	1	1	1	1	1	0	Male	Rectum	Rectal Adenocarcinoma	4 - rectum	Rectum	Stage IIA	1	Non-Hyp	1	MSS	Cluster4	Invasive	0	0.794	2.07	75	M0	NO	Mar-40	C20.9	NO	N0	YES	0	32	0	WITH TUMOR	1.5	T3	YES	R0
TCGA-AG-A00Y	#N/A	#N/A	#N/A	700	700	LIVING	0	700	2	0	1	1	1	1	1	1	1	0	Male	Rectum	Rectal Adenocarcinoma	4 - rectum	Rectum	Stage IIA	1	Non-Hyp	1	MSS	Cluster3	Invasive	0	3.27	3.63	68	M0	YES	Mar-40	C20.9	NO	N0	YES	0	31	0	WITH TUMOR	4.21	T3	NO	R0
TCGA-AG-A011	#N/A	#N/A	#N/A	518	518	LIVING	0	518	2	0	1	1	1	1	1	1	1	1	Male	Rectum	Rectal Adenocarcinoma	4 - rectum	Rectum	Stage IIA	1	Non-Hyp	1	MSS	CIMP.L	Invasive	0	0.853	3.16	80	M0	NO	Mar-40	C20.9	NO	N0	YES	0	14	0	WITH TUMOR	#N/A	T3	NO	R0
TCGA-AG-A014	#N/A	#N/A	#N/A	484	484	LIVING	0	484	2	0	1	1	1	1	1	1	1	0	Male	Rectum	Rectal Adenocarcinoma	4 - rectum	Rectum	Stage I	1	Non-Hyp	1	MSS	Cluster4	CIN	0	1.01	3.92	86	M0	NO	Mar-40	C20.9	NO	N0	YES	0	15	0	WITH TUMOR	#N/A	T2	YES	R0
TCGA-AG-A015	#N/A	#N/A	#N/A	396	396	LIVING	0	396	2	0	1	1	1	1	1	1	1	1	Female	Rectum	Rectal Adenocarcinoma	4 - rectum	Rectum	Stage I	1	Non-Hyp	1	MSS	Cluster3	Invasive	0	0.639	2.71	64	M0	YES	Mar-40	C20.9	NO	N0	YES	1	18	0	WITH TUMOR	#N/A	T1	YES	R0
TCGA-AG-A016	#N/A	#N/A	#N/A	31	31	LIVING	0	31	2	0	1	1	1	1	1	1	1	1	Male	Rectum	Rectal Adenocarcinoma	4 - rectum	Rectum	Stage IV	1	Non-Hyp	1	MSS	Cluster3	CIN	0	0.87	1.65	55	M1	NO	Mar-40	C20.9	YES	N2	YES	0	19	4	WITH TUMOR	#N/A	T3	NO	R2
TCGA-AG-A01J	#N/A	#N/A	#N/A	31	31	LIVING	0	31	2	0	1	1	1	1	1	1	1	0	Female	Rectum	Rectal Adenocarcinoma	4 - rectum	Rectum	Stage IIA	#N/A	#N/A	1	MSS	Cluster4	CIN	0	#N/A	#N/A	59	M0	NO	Mar-40	C20.9	NO	N0	YES	0	23	0	WITH TUMOR	#N/A	T3	NO	R0
TCGA-AG-A01L	#N/A	#N/A	#N/A	365	365	LIVING	0	365	2	0	1	1	1	1	1	0	1	1	Male	Rectum	Rectal Adenocarcinoma	4 - rectum	Rectum	Stage IIIB	1	Non-Hyp	1	MSS	Cluster3	Invasive	0	0.425	2.3	58	M0	NO	Mar-40	C20.9	YES	N1	YES	0	47	2	WITH TUMOR	#N/A	T3	NO	R0
TCGA-AG-A01N	#N/A	#N/A	#N/A	365	365	LIVING	0	365	2	0	1	0	1	1	1	1	1	1	Female	Rectum	Rectal Adenocarcinoma	4 - rectum	Rectum	Stage IV	#N/A	#N/A	1	MSS	Cluster4	CIN	0	#N/A	#N/A	68	M1	YES	Mar-40	C20.9	YES	N0	YES	0	23	0	WITH TUMOR	#N/A	T2	YES	R2
TCGA-AG-A01W	#N/A	#N/A	#N/A	2130	2130	LIVING	0	2130	2	0	1	1	0	0	1	1	1	1	Female	Rectum	Rectal Adenocarcinoma	4 - rectum	Rectum	Stage IIA	1	Non-Hyp	1	MSS	#N/A	#N/A	#N/A	0.941	3.17	67	M0	NO	Mar-40	C20.9	YES	N0	YES	2	20	0	WITH TUMOR	2.07	T3	NO	R0
TCGA-AG-A01Y	#N/A	#N/A	#N/A	1946	1946	LIVING	0	1946	2	0	1	1	0	0	1	1	1	1	Female	Rectum	Rectal Adenocarcinoma	4 - rectum	Rectum	Stage IIA	1	Non-Hyp	1	MSS	#N/A	#N/A	#N/A	0.901	2.18	49	M0	NO	Mar-40	C20.9	YES	N0	YES	0	17	0	WITH TUMOR	5.85	T3	NO	R0
TCGA-AG-A020	#N/A	#N/A	#N/A	334	334	LIVING	0	334	2	0	1	1	0	0	1	1	1	1	Female	Rectum	Rectal Mucinous Adenocarcinoma	4 - rectum	Rectum	Stage IIIB	1	Non-Hyp	1	MSS	#N/A	#N/A	#N/A	0.656	1.83	57	M0	NO	Mar-80	C20.9	YES	N1	YES	0	12	1	WITH TUMOR	1.43	T3	NO	R0
TCGA-AG-A026	Dead	59	59	59	59	DECEASED	1	59	2	0	1	1	1	1	1	1	1	1	Male	Rectum	Rectal Adenocarcinoma	4 - rectum	Rectum	#N/A	1	Non-Hyp	1	MSS	Cluster3	#N/A	0	1.69	5.67	66	M0	NO	Mar-40	C20.9	YES	N0	YES	0	15	0	WITH TUMOR	9.65	#N/A	NO	R1
TCGA-AG-A02N	#N/A	#N/A	#N/A	1884	1884	LIVING	0	1884	2	0	1	1	0	0	1	1	1	1	Male	Rectum	Rectal Adenocarcinoma	4 - rectum	Rectum	Stage IIA	2	Hyp	2	MSI-H	#N/A	#N/A	#N/A	10.7	29.9	67	M0	NO	Mar-40	C20.9	YES	N0	YES	0	12	0	WITH TUMOR	2.07	T3	NO	R0
TCGA-AG-A02X	#N/A	#N/A	#N/A	1246	1246	LIVING	0	1246	2	0	1	0	1	1	1	1	1	1	Male	Rectum	Rectal Adenocarcinoma	4 - rectum	Rectum	Stage I	1	Non-Hyp	1	MSS	CIMP.H	Invasive	0	1.69	3.88	77	M0	NO	Mar-40	C20.9	YES	N0	YES	0	15	0	WITH TUMOR	8.14	T2	NO	R0
TCGA-AG-A032	#N/A	#N/A	#N/A	1156	1156	LIVING	0	1156	2	0	1	0	1	1	1	0	1	0	Male	Rectum	Rectal Adenocarcinoma	4 - rectum	Rectum	Stage IIIB	1	Non-Hyp	1	MSS	Cluster4	CIN	0	0.681	2.45	68	M0	NO	Mar-40	C20.9	YES	N1	YES	0	16	2	WITH TUMOR	7.77	T3	NO	R0
TCGA-AG-A036	#N/A	#N/A	#N/A	2192	2192	LIVING	0	2192	2	0	1	1	0	0	0	1	1	1	Male	Rectum	Rectal Adenocarcinoma	4 - rectum	Rectum	Stage IIIB	1	Non-Hyp	1	MSS	#N/A	#N/A	#N/A	1.28	3.64	71	M0	NO	Mar-40	C20.9	#N/A	N2	YES	0	30	18	WITH TUMOR	2.2	T3	NO	R0
[truncated: 9 more columns]

## Sheet: Table S2b
Proteome_fno_T	CRF.Name	Number.of.Days.between..Date.Collected.....Date.of.Last.Contact.	OS_status	OS_time	Vital.Status..at.time.of.last.contact.	Number.of.Days.between..Date.Collected.....Date.of.Death.	Chemotherapy_status	Clinical	Mutation	CNV	miRNA.seq	mRNA.seq	Label.free.Proteome	TMT.Proteome	TMT.Proteome..Normal.	TMT.Phosphoproteome	TMT.Phosphoproteome..Normal.	Age	Gender	Mucinous	Subsite	PT	PN	Stage	CEA	Vascular_Invasion	Lymphatic_Invasion	Perineural_Invasion	Synchronous_Tumors	Polyps_History	Polyps_Present	Vital.Status	Tumor.Status	POLE_mutation	MSH2_mutation	MSH6_mutation	PMS2_mutation	KRAS_mutation	NRAS_mutation	BRAF_mutation	mutation_rate	Hypermutation_status	MSI_PCR_Result	MSmutectFishercall	CMS	ProS	UMS	StromalScore	ImmuneScore
X01CO001	One Year	390	0	390	Living	#N/A	2	1	1	1	1	1	1	#N/A	1	#N/A	1	61	Male	Mucinous	Sigmoid Colon	T4a	N2b	3	4.9	Yes	Yes	No	No	No	No	Living	Tumor free	0	0	0	0	0	0	0	3.33333	nonhyper	#N/A	MSS	CMS3	C	#N/A	-368.881	573.316
X01CO005	One Year	#N/A	1	531	Deceased	531	2	1	1	1	1	1	1	1	1	1	1	70	Female	Not Mucinous	Sigmoid Colon	T3	N0	2	1	No	No	No	No	Yes	Yes	Deceased	Tumor free	0	0	0	0	0	0	0	5.9	nonhyper	#N/A	MSS	CMS2	E	CIN	-1102.3	-427.027
X01CO006	One Year	365	0	365	Living	#N/A	2	1	1	1	1	1	1	1	1	1	1	75	Female	Mucinous	Ascending Colon	T4a	N2b	3	#N/A	Yes	Yes	Yes	Yes	No	No	Living	With tumor	0	0	0	0	0	0	0	3.16667	nonhyper	#N/A	MSS	CMS3	C	#N/A	466.175	1542.02
X01CO008	One Year	369	0	369	Living	#N/A	2	1	1	1	1	1	1	1	1	1	1	54	Female	Mucinous	Descending Colon	T3	N0	2	#N/A	No	No	No	No	No	Yes	Living	With tumor	0	0	0	0	1	0	0	6.7	nonhyper	#N/A	MSS	CMS3	E	CIN	-1122.84	-54.7177
X01CO015	One Year	373	0	373	Living	#N/A	2	1	1	1	1	1	1	1	1	1	1	89	Male	Not Mucinous	Cecum	T2	N0	1	1	#N/A	No	#N/A	No	Yes	Yes	Living	Tumor free	0	0	0	0	0	0	0	5.96667	nonhyper	#N/A	MSS	CMS2	E	CIN	-237.514	561.061
X01CO019	One Year	356	0	356	Living	#N/A	2	1	1	1	1	1	1	1	1	1	1	63	Female	Mucinous	Sigmoid Colon	T4a	N2a	3	3.5	Yes	Yes	Yes	Yes	No	No	Living	With tumor	0	0	0	0	0	1	0	4.36667	nonhyper	MSS	MSS	CMS2	E	CIN	-735.6	-168.717
X01CO022	One Year	375	0	375	Living	#N/A	2	1	1	1	1	1	1	1	1	1	1	77	Female	Mucinous	Cecum	T2	N0	1	8.1	#N/A	#N/A	#N/A	No	#N/A	No	Living	Tumor free	0	0	1	0	0	0	1	71.6667	hyper	MSI-high	MSI-H	CMS3	B	MSI	-1014.57	-14.2549
X05CO002	One Year	349	0	349	Living	#N/A	2	1	1	1	1	1	1	1	1	1	1	#N/A	Female	Not Mucinous	Sigmoid Colon	T2	N1a	3	1.1	No	No	No	No	No	No	Living	Tumor free	0	0	0	0	0	0	0	4.46667	nonhyper	MSI-low	MSS	CMS4	D	#N/A	1397.38	865.599
X05CO003	One Year	320	0	320	Living	#N/A	2	1	1	1	1	1	1	1	1	1	1	#N/A	Male	Not Mucinous	Ascending Colon	T3	N0	2	1.7	No	No	No	No	No	Yes	Living	Tumor free	1	0	0	0	0	0	0	27.6667	hyper	MSI-high	MSI-H	CMS1	B	MSI	254.33	915.559
X05CO004	One Year	367	0	367	Living	#N/A	2	1	#N/A	#N/A	#N/A	#N/A	1	#N/A	#N/A	#N/A	#N/A	40	Female	Not Mucinous	Sigmoid Colon	T3	N1b	3	1.2	Yes	Yes	No	No	Yes	Yes	Living	Tumor free	#N/A	#N/A	#N/A	#N/A	#N/A	#N/A	#N/A	#N/A	#N/A	#N/A	#N/A	#N/A	#N/A	#N/A	#N/A	#N/A
X05CO006	One Year	327	0	327	Living	#N/A	2	1	1	1	1	1	1	1	1	1	1	83	Female	Not Mucinous	Cecum	T3	N1b	3	30.5	No	No	No	No	No	No	Living	Tumor free	0	0	1	1	0	0	1	32.7333	hyper	MSI-high	MSI-H	CMS1	B	MSI	-125.245	714.28
X05CO007	One Year	362	0	362	Living	#N/A	2	1	1	1	#N/A	1	1	#N/A	1	#N/A	1	85	Female	Mucinous	Sigmoid Colon	T4a	N2b	3	3.8	Yes	Yes	Yes	No	Yes	No	Living	Tumor free	1	0	0	1	0	0	0	35.1333	hyper	MSI-high	MSI-H	CMS1	D	MSI	300.558	1258.97
X05CO011	One Year	386	0	386	Living	#N/A	2	1	1	#N/A	1	1	1	1	1	1	1	39	Male	Not Mucinous	Sigmoid Colon	T3	N0	2	2.4	Yes	Yes	No	No	Yes	Yes	Living	Tumor free	0	0	0	0	0	0	0	4.7	nonhyper	MSS	MSS	CMS2	E	CIN	-564.083	-531.733
X05CO015	One Year	#N/A	1	130	Deceased	130	2	1	1	1	1	1	1	1	1	1	1	74	Female	Not Mucinous	Ascending Colon	T3	N0	2	1.5	No	No	No	No	#N/A	Yes	Deceased	Tumor free	0	1	0	1	0	0	1	49.3333	hyper	MSI-high	MSI-H	CMS1	B	MSI	408.482	1362.69
X05CO020	One Year	371	0	371	Living	#N/A	2	1	1	1	1	1	1	1	1	1	1	93	Female	Not Mucinous	Cecum	T3	N0	2	#N/A	No	No	Yes	No	No	Yes	Living	Tumor free	0	0	0	0	1	0	0	11.9333	nonhyper	MSI-low	MSS	#N/A	#N/A	CIN	93.563	322.625
X05CO026	One Year	318	0	318	Living	#N/A	2	1	1	1	1	1	1	1	1	1	1	70	Female	Not Mucinous	Splenic Flexure	T3	N1a	3	1.7	No	No	No	Yes	No	Yes	Living	Tumor free	0	0	0	0	1	0	0	5.46667	nonhyper	MSI-low	MSS	CMS2	E	CIN	-388.168	-81.4818
X05CO028	One Year	326	0	326	Living	#N/A	2	1	1	1	1	1	1	1	1	1	1	61	Female	Not Mucinous	Ascending Colon	T2	N0	1	#N/A	No	No	No	No	No	Yes	Living	Tumor free	0	0	0	0	1	0	0	11.1333	nonhyper	MSS	MSS	CMS3	E	CIN	-737.672	557.486
X05CO029	One Year	357	0	357	Living	#N/A	2	1	1	1	1	1	1	1	1	1	1	55	Female	Not Mucinous	Hepatix Flexure	T3	N0	2	2.6	No	No	No	No	No	Yes	Living	Tumor free	0	0	0	0	0	0	0	5.56667	nonhyper	MSS	MSS	CMS3	E	CIN	-637.787	952.383
X05CO032	One Year	337	0	337	Living	#N/A	2	1	1	1	1	1	1	1	1	1	1	79	Male	Not Mucinous	Ascending Colon	T3	N1a	3	2	No	No	No	No	No	Yes	Living	Tumor free	0	0	0	0	0	0	1	34.8667	hyper	MSI-high	MSI-H	CMS1	B	MSI	403.485	979.355
X05CO033	One Year	336	0	336	Living	#N/A	2	1	1	1	1	1	1	1	1	1	1	61	Male	Mucinous	Cecum	T2	N2a	3	1.8	Yes	Yes	No	No	Yes	Yes	Living	With tumor	0	0	0	0	1	0	0	6.53333	nonhyper	MSS	MSS	CMS4	C	Mesenchymal	1082.17	1782.78
X05CO034	One Year	372	0	372	Living	#N/A	2	1	1	1	1	1	1	1	1	1	1	55	Female	Not Mucinous	Cecum	T3	N1a	3	1.7	No	No	No	No	No	No	Living	Tumor free	0	0	0	0	0	0	0	4.3	nonhyper	MSS	MSS	CMS2	A	CIN	244.801	270.734
X05CO035	One Year	359	0	359	Living	#N/A	2	1	1	1	1	1	1	1	1	1	1	64	Female	Not Mucinous	Ascending Colon	T3	N0	2	2.6	No	No	No	No	No	Yes	Living	Tumor free	0	0	0	0	0	0	0	8.63333	nonhyper	MSS	MSS	#N/A	A	CIN	214.767	203.973
X05CO037	One Year	340	0	340	Living	#N/A	2	1	1	1	1	1	1	1	1	1	1	50	Male	Mucinous	Sigmoid Colon	T3	N0	2	25	No	No	No	No	No	No	Living	Tumor free	0	0	1	0	0	0	0	41.8667	hyper	MSI-high	MSI-H	#N/A	B	MSI	750.422	743.938
X05CO039	One Year	#N/A	1	214	Deceased	214	1	1	1	1	1	1	1	1	1	1	1	74	Male	Mucinous	Ascending Colon	T4a	N0	2	12.1	No	No	No	No	No	No	Deceased	Tumor free	1	0	1	0	0	0	1	42.8	hyper	MSI-high	MSI-H	CMS3	E	#N/A	-959.909	385.812
X05CO041	One Year	362	0	362	Living	#N/A	1	1	1	1	1	1	1	1	1	1	1	79	Female	Not Mucinous	Ascending Colon	T3	N0	2	4	No	No	No	No	No	No	Living	Tumor free	1	0	0	0	0	0	1	64.8333	hyper	MSI-high	MSI-H	CMS1	B	MSI	-293.306	1065.3
X05CO044	One Year	364	0	364	Living	#N/A	1	1	1	1	1	1	1	1	1	1	1	71	Female	Not Mucinous	Descending Colon	T4a	N0	2	#N/A	No	No	No	No	Yes	Yes	Living	Tumor free	0	0	1	0	0	1	1	93.9	hyper	MSI-high	MSI-H	CMS1	B	MSI	-577.886	-530.034
X05CO045	One Year	353	0	353	Living	#N/A	2	1	1	1	1	1	1	1	1	1	1	75	Female	Not Mucinous	Ascending Colon	T3	N1b	3	4.9	No	No	No	No	Yes	No	Living	Tumor free	0	0	0	0	0	0	0	7.1	nonhyper	MSS	MSS	#N/A	#N/A	CIN	385.746	969.765
X05CO048	One Year	333	0	333	Living	#N/A	2	1	1	1	1	1	1	1	1	1	1	78	Female	Mucinous	Ascending Colon	T4b	N2a	3	2	Yes	Yes	No	No	No	No	Living	Tumor free	1	0	1	0	0	0	1	39.6333	hyper	MSI-high	MSI-H	CMS1	B	MSI	125.361	547.82
X05CO049	One Year	327	0	327	Living	#N/A	2	1	1	1	1	1	1	1	1	1	1	88	Male	Not Mucinous	Hepatix Flexure	T3	N0	2	#N/A	No	No	No	No	No	Yes	Living	Tumor free	0	0	0	0	0	0	0	6.5	nonhyper	MSS	MSS	#N/A	E	CIN	-279.759	776.455
X05CO050	One Year	299	0	299	Living	#N/A	2	1	1	1	1	1	1	1	1	1	1	67	Female	Mucinous	Cecum	T3	N1b	3	0.8	No	No	No	No	No	Yes	Living	Tumor free	0	0	1	0	0	0	1	76.7	hyper	MSI-high	MSI-H	CMS3	C	#N/A	-1174.78	54.8315
X05CO053	One Year	363	0	363	Living	#N/A	2	1	1	1	1	1	1	1	1	1	1	52	Male	Not Mucinous	Cecum	T3	N1b	2	14.3	No	No	No	No	No	No	Living	Tumor free	0	0	0	0	1	0	0	4.53333	nonhyper	MSS	MSS	CMS3	E	CIN	-884.477	328.354
X05CO054	One Year	355	0	355	Living	#N/A	2	1	1	1	1	1	1	1	1	1	1	87	Male	Not Mucinous	Cecum	T2	N0	1	1.6	No	No	No	No	Yes	Yes	Living	Tumor free	0	0	0	0	1	0	0	12.0333	nonhyper	MSI-low	MSS	CMS3	E	CIN	-1256.28	451.863
X06CO001	One Year	84	0	84	Living	#N/A	2	1	1	1	1	1	1	1	1	1	1	75	Male	Not Mucinous	Ascending Colon	T3	N1b	3	4.8	#N/A	#N/A	#N/A	No	#N/A	#N/A	Living	With tumor	0	0	0	0	0	0	0	3.86667	nonhyper	#N/A	MSS	CMS2	E	CIN	-481.031	78.3623
X06CO002	One Year	321	0	321	Living	#N/A	2	1	1	1	1	1	1	1	1	1	1	73	Female	Not Mucinous	Sigmoid Colon	T3	N2a	3	#N/A	No	Yes	No	No	#N/A	#N/A	Living	Tumor free	0	0	0	0	0	0	0	5.3	nonhyper	#N/A	MSS	CMS4	C	Mesenchymal	675.128	664.514
X09CO005	One Year	293	0	293	Living	#N/A	1	1	1	1	1	1	1	1	1	1	1	69	Female	Mucinous	Cecum	T3	N1a	3	6.3	Yes	Yes	#N/A	Yes	#N/A	Yes	Living	#N/A	0	0	0	0	1	0	0	5.2	nonhyper	#N/A	MSS	#N/A	D	CIN	-264.717	152.727
X09CO006	One Year	39	0	39	Living	#N/A	1	1	1	1	1	1	1	1	1	1	1	87	Male	#N/A	Ascending Colon	T2	N0	1	#N/A	#N/A	#N/A	#N/A	Yes	#N/A	Yes	Living	#N/A	0	0	0	0	1	0	0	4.03333	nonhyper	#N/A	MSS	CMS3	#N/A	CIN	-235.171	548.436
X09CO008	One Year	342	0	342	Living	#N/A	1	1	1	1	1	1	1	1	1	1	1	54	Male	Mucinous	Cecum	T3	N1a	3	6.3	Yes	Yes	#N/A	Yes	#N/A	Yes	Living	Tumor free	0	0	0	0	0	0	0	5.43333	nonhyper	#N/A	MSS	CMS2	A	CIN	57.2973	436.356
X09CO011	One Year	242	0	242	Living	#N/A	2	1	1	1	1	1	1	1	1	1	1	75	Female	Mucinous	Cecum	T2	N0	1	3.8	No	No	No	Yes	Yes	Yes	Living	Tumor free	0	0	0	0	1	0	0	3.93333	nonhyper	MSS	MSS	CMS3	E	CIN	-581.256	401.483
X09CO013	One Year	182	0	182	Living	#N/A	2	1	1	1	1	1	1	1	1	1	1	50	Male	Mucinous	Cecum	T3	N1b	3	3.1	No	No	No	No	No	Yes	Living	#N/A	0	0	0	0	1	0	0	5.93333	nonhyper	MSS	MSS	CMS2	E	CIN	-246.585	27.5994
X09CO014	One Year	323	0	323	Living	#N/A	2	1	1	1	1	1	1	1	1	1	1	67	Male	Not Mucinous	Ascending Colon	T3	N0	2	1.3	#N/A	#N/A	No	No	No	Yes	Living	Tumor free	0	0	0	0	1	0	0	10.0333	nonhyper	MSS	MSS	CMS2	A	CIN	331.339	1278.49
X09CO015	One Year	362	0	362	Living	#N/A	2	1	1	1	1	1	1	1	1	1	1	69	Male	Not Mucinous	Cecum	T3	N1b	3	3.5	No	No	No	Yes	No	No	Living	Tumor free	0	0	0	0	0	0	0	4.73333	nonhyper	MSS	MSS	CMS2	E	CIN	-105.743	701.535
X09CO018	One Year	272	0	272	Living	#N/A	2	1	1	1	1	1	1	1	1	1	1	53	Female	Not Mucinous	Sigmoid Colon	T2	N1a	3	1.7	#N/A	#N/A	No	No	No	No	Living	Tumor free	0	0	0	0	0	1	0	5.56667	nonhyper	MSS	MSS	#N/A	B	#N/A	296.939	1329.08
X09CO019	One Year	206	0	206	Living	#N/A	2	1	1	1	1	1	1	1	1	1	1	88	Male	Not Mucinous	Hepatix Flexure	T2	N0	1	#N/A	No	No	No	No	No	Yes	Living	Tumor free	0	0	0	0	1	0	0	6.06667	nonhyper	MSS	MSS	CMS2	E	CIN	-368.659	210.684
X09CO022	One Year	315	0	315	Living	#N/A	2	1	1	1	1	1	1	1	1	1	1	72	Female	Mucinous	Cecum	T4a	N0	2	#N/A	#N/A	#N/A	No	No	No	No	Living	Tumor free	0	0	0	0	1	0	0	5.86667	nonhyper	MSS	MSS	CMS2	E	CIN	-753.162	594.973
X11CO005	One Year	383	0	383	Living	#N/A	2	1	1	1	1	1	1	1	1	1	1	66	Female	Not Mucinous	Sigmoid Colon	T3	N1	3	8.24	No	No	No	No	No	No	Living	Tumor free	0	0	0	0	1	0	0	3.3	nonhyper	MSS	MSS	CMS4	C	Mesenchymal	608.613	878.886
X11CO007	One Year	377	0	377	Living	#N/A	2	1	1	1	1	1	1	1	1	1	1	64	Female	Not Mucinous	Ascending Colon	T3	N0	2	#N/A	No	No	No	No	No	No	Living	Tumor free	0	0	1	0	0	0	1	71.6	hyper	MSI-high	MSI-H	CMS1	B	MSI	-328.265	806.528
X11CO008	One Year	383	0	383	Living	#N/A	2	1	1	1	1	1	1	1	1	1	1	67	Female	Not Mucinous	Sigmoid Colon	T3	N1	3	11.34	No	No	No	No	No	No	Living	Tumor free	0	0	0	0	1	0	0	4.63333	nonhyper	MSS	MSS	CMS4	C	Mesenchymal	776.609	715.233
X11CO010	One Year	374	0	374	Living	#N/A	2	1	1	1	1	1	1	1	1	1	1	59	Female	Not Mucinous	Ascending Colon	T3	N0	2	1.78	No	No	No	No	No	No	Living	Tumor free	0	0	0	0	0	0	0	4.46667	nonhyper	MSS	MSS	CMS2	E	CIN	189.82	767.294
X11CO018	One Year	370	0	370	Living	#N/A	2	1	1	1	1	1	1	1	1	1	1	74	Male	Not Mucinous	Hepatix Flexure	T3	N0	2	#N/A	No	No	No	No	No	No	Living	Tumor free	0	0	1	0	0	0	1	62.6333	hyper	MSI-high	MSI-H	CMS1	B	MSI	515.869	1077.71
X11CO019	One Year	372	0	372	Living	#N/A	2	1	1	1	1	1	1	1	1	1	1	74	Female	Not Mucinous	Cecum	T3	N1b	3	#N/A	No	No	No	No	No	No	Living	Tumor free	0	0	0	0	0	0	1	6.46667	nonhyper	MSS	MSS	CMS4	#N/A	#N/A	881.786	686.488
X11CO020	One Year	369	0	369	Living	#N/A	2	1	1	1	1	1	1	1	1	1	1	55	Male	Not Mucinous	Sigmoid Colon	T3	N1b	3	#N/A	No	No	No	No	No	No	Living	Tumor free	0	0	0	0	1	0	0	6.7	nonhyper	MSS	MSS	#N/A	C	#N/A	61.6537	327.539
X11CO021	One Year	#N/A	1	95	Deceased	95	2	1	1	1	1	1	1	1	1	1	1	75	Female	Not Mucinous	Sigmoid Colon	T3	N2a	4	#N/A	No	No	No	No	No	No	Deceased	With tumor	0	0	0	0	1	0	0	4.23333	nonhyper	MSS	MSS	CMS4	#N/A	#N/A	1010.01	781.908
X11CO022	One Year	382	0	382	Living	#N/A	2	1	1	1	1	1	1	1	1	1	1	72	Male	Not Mucinous	Sigmoid Colon	T4b	N0	4	#N/A	No	No	No	No	No	No	Living	With tumor	0	0	0	0	0	0	0	6.06667	nonhyper	MSS	MSS	CMS2	E	CIN	-243.522	826.348
X11CO027	One Year	378	0	378	Living	#N/A	2	1	1	1	1	1	1	1	1	1	1	55	Female	Not Mucinous	Sigmoid Colon	T3	N0	2	#N/A	No	No	No	No	No	No	Living	Tumor free	0	0	0	0	0	0	0	6.13333	nonhyper	MSS	MSS	CMS2	#N/A	CIN	-252.138	124.419
X11CO030	One Year	369	0	369	Living	#N/A	2	1	1	1	1	1	1	1	1	1	1	55	Female	Not Mucinous	Descending Colon	T3	N0	2	14.52	No	No	No	No	No	No	Living	Tumor free	0	0	0	0	0	0	0	3.93333	nonhyper	#N/A	MSS	CMS4	C	Mesenchymal	437.963	683.547
X11CO031	One Year	385	0	385	Living	#N/A	2	1	1	1	1	1	1	1	1	1	1	54	Female	Not Mucinous	Descending Colon	T3	N0	2	1.98	No	No	No	No	No	No	Living	Tumor free	1	0	1	0	0	0	0	34.9	hyper	#N/A	MSI-H	CMS1	B	MSI	57.035	1319.86
X11CO032	One Year	368	0	368	Living	#N/A	2	1	1	1	1	1	1	1	1	1	1	58	Male	Not Mucinous	Sigmoid Colon	T3	N1b	3	3.1	No	No	No	No	No	No	Living	Tumor free	0	0	0	0	0	0	0	3.43333	nonhyper	MSS	MSS	#N/A	C	#N/A	-53.0436	872.348
X11CO033	One Year	384	0	384	Living	#N/A	2	1	1	1	1	1	1	1	1	1	1	55	Male	Not Mucinous	Descending Colon	T3	N0	2	4.41	No	No	No	No	No	No	Living	Tumor free	1	0	0	1	0	0	0	71.3333	hyper	#N/A	MSI-H	CMS4	C	Mesenchymal	1000.37	1554.88
X11CO036	One Year	366	0	366	Living	#N/A	2	1	1	1	1	1	1	1	1	1	1	37	Male	Not Mucinous	Ascending Colon	T3	N1a	3	5.86	No	No	No	No	No	No	Living	Tumor free	1	0	0	0	0	0	0	63.6667	hyper	MSI-high	MSI-H	CMS1	B	MSI	237.703	1057.77
X11CO037	One Year	368	0	368	Living	#N/A	2	1	1	1	1	1	1	1	1	1	1	52	Female	Not Mucinous	Sigmoid Colon	T3	N1b	3	21.18	No	No	No	No	No	No	Living	Tumor free	0	0	0	0	0	0	0	4.53333	nonhyper	MSS	MSS	CMS4	C	Mesenchymal	127.285	587.336
X11CO039	One Year	385	0	385	Living	#N/A	2	1	1	1	1	1	1	1	1	1	1	68	Female	Not Mucinous	Sigmoid Colon	T3	N0	2	#N/A	No	No	No	No	No	No	Living	Tumor free	0	0	1	0	0	0	0	7.7	nonhyper	MSS	MSS	CMS2	D	CIN	-430.198	170.933
X11CO042	One Year	374	0	374	Living	#N/A	2	1	1	1	1	1	1	1	1	1	1	71	Male	Not Mucinous	Splenic Flexure	T3	N0	2	#N/A	No	No	No	No	No	No	Living	Tumor free	0	0	0	0	0	0	0	6.46667	nonhyper	MSS	MSS	CMS2	C	#N/A	-534.257	-78.8118
X11CO043	One Year	374	0	374	Living	#N/A	2	1	1	1	1	1	1	1	1	1	1	67	Female	Not Mucinous	Ascending Colon	T3	N0	2	#N/A	No	No	No	No	No	No	Living	Tumor free	0	0	0	0	1	0	0	4.4	nonhyper	MSS	MSS	CMS2	D	CIN	-746.051	-208.498
X11CO044	One Year	#N/A	1	234	Deceased	234	2	1	1	1	1	1	1	1	1	1	1	69	Female	Not Mucinous	Ascending Colon	T3	N1a	4	#N/A	No	No	No	No	No	No	Deceased	With tumor	0	0	0	0	1	0	0	7.36667	nonhyper	MSS	MSS	#N/A	#N/A	CIN	499.34	1236.74
X11CO045	One Year	385	0	385	Living	#N/A	2	1	1	1	1	1	1	1	1	1	1	71	Female	Not Mucinous	Cecum	T3	N1b	3	#N/A	No	No	No	No	No	No	Living	Tumor free	0	0	0	0	1	0	0	8.4	nonhyper	MSS	MSS	CMS4	C	Mesenchymal	554.044	641.002
X11CO047	One Year	384	0	384	Living	#N/A	2	1	1	1	1	1	1	1	1	1	1	65	Male	Not Mucinous	Sigmoid Colon	T3	N0	2	#N/A	No	No	No	No	No	No	Living	Tumor free	0	0	0	0	0	0	0	5.16667	nonhyper	MSS	MSS	CMS4	E	#N/A	351.446	264.333
X11CO048	One Year	383	0	383	Living	#N/A	2	1	1	1	1	1	1	1	1	1	1	64	Male	Mucinous	Cecum	T3	N0	2	#N/A	No	No	No	No	No	No	Living	Tumor free	0	0	0	0	0	1	0	6.7	nonhyper	MSS	MSS	CMS4	C	Mesenchymal	1203.67	1310.45
X11CO052	One Year	#N/A	1	222	Deceased	222	2	1	1	1	1	1	1	1	1	1	1	67	Female	Not Mucinous	Cecum	T3	N2a	3	#N/A	No	No	No	No	No	No	Deceased	With tumor	0	0	0	0	1	0	0	6.46667	nonhyper	#N/A	MSS	#N/A	B	#N/A	668.214	1800
X11CO053	One Year	410	0	410	Living	#N/A	2	1	1	1	1	1	1	1	1	1	1	64	Female	Not Mucinous	Descending Colon	T3	N0	2	#N/A	No	No	No	No	No	No	Living	Tumor free	0	0	0	0	0	0	0	9.96667	nonhyper	MSS	MSS	CMS2	#N/A	CIN	-69.4192	553.951
X11CO054	One Year	403	0	403	Living	#N/A	2	1	1	1	1	1	1	1	1	1	1	66	Female	Not Mucinous	Sigmoid Colon	T3	N0	2	#N/A	No	No	No	No	No	No	Living	Tumor free	0	0	0	0	0	1	0	4.5	nonhyper	MSS	MSS	CMS2	E	CIN	-193.008	1263.69
X11CO057	One Year	399	0	399	Living	#N/A	2	1	1	1	1	1	1	1	1	1	1	74	Male	Not Mucinous	Ascending Colon	T3	N1	3	#N/A	No	No	No	No	No	No	Living	Tumor free	0	0	0	0	1	0	0	5.56667	nonhyper	MSS	MSS	#N/A	E	CIN	295.98	465.639
X11CO058	One Year	399	0	399	Living	#N/A	2	1	1	1	1	1	1	1	1	1	1	57	Female	Not Mucinous	Ascending Colon	T3	N0	2	#N/A	No	No	No	No	No	No	Living	Tumor free	0	0	0	0	1	0	0	4.23333	nonhyper	MSS	MSS	CMS4	C	Mesenchymal	433.393	500.396
X11CO060	One Year	398	0	398	Living	#N/A	2	1	1	1	1	1	1	#N/A	1	#N/A	1	72	Female	Not Mucinous	Sigmoid Colon	T3	N0	2	#N/A	No	No	No	No	No	No	Living	Tumor free	0	0	0	0	0	0	0	4.73333	nonhyper	MSS	MSS	CMS2	E	CIN	-407.329	547.331
X11CO061	One Year	387	0	387	Living	#N/A	2	1	1	1	1	1	1	1	1	1	1	48	Female	Not Mucinous	Ascending Colon	T3	N0	2	#N/A	No	No	No	No	No	No	Living	Tumor free	0	0	0	0	0	0	0	24.5333	hyper	MSI-high	MSI-H	#N/A	C	#N/A	794.57	1679.39
X11CO062	One Year	378	0	378	Living	#N/A	2	1	1	1	1	1	1	1	1	1	1	75	Male	Not Mucinous	Ascending Colon	T3	N0	4	5.59	No	No	No	No	No	No	Living	Tumor free	0	0	0	1	1	0	0	5	nonhyper	MSS	MSS	#N/A	B	#N/A	536.436	637.167
X11CO070	One Year	372	0	372	Living	#N/A	2	1	1	1	1	1	1	1	1	1	1	35	Male	Not Mucinous	Sigmoid Colon	T3	N1b	3	124.6	No	No	No	No	No	No	Living	Tumor free	1	1	1	1	1	0	1	420.933	hyper	MSS	MSS	CMS4	C	Mesenchymal	930.627	1260.3
X11CO072	One Year	133	0	133	Living	#N/A	2	1	1	1	1	1	1	1	1	1	1	65	Female	Not Mucinous	Descending Colon	T3	N1b	3	#N/A	No	No	No	No	No	No	Living	Tumor free	0	0	0	0	0	0	0	7.56667	nonhyper	MSS	MSS	CMS2	E	CIN	175.708	741.621
X11CO077	One Year	383	0	383	Living	#N/A	2	1	1	1	1	1	1	1	1	1	1	68	Male	Not Mucinous	Descending Colon	T3	N0	2	#N/A	No	No	No	No	No	No	Living	With tumor	0	0	0	0	0	0	0	5.76667	nonhyper	MSS	MSS	CMS4	C	Mesenchymal	806.525	709.298
X11CO079	One Year	377	0	377	Living	#N/A	2	1	1	1	1	1	1	1	1	1	1	75	Female	Not Mucinous	Sigmoid Colon	T3	N1	3	#N/A	No	No	No	No	No	No	Living	Tumor free	0	0	0	0	0	0	0	4.03333	nonhyper	MSS	MSS	CMS2	C	#N/A	-545.804	-358.884
X14CO002	One Year	12	0	12	Living	#N/A	2	1	1	1	1	1	1	#N/A	1	#N/A	1	63	Male	Not Mucinous	Sigmoid Colon	T3	N0	2	1.7	#N/A	#N/A	No	#N/A	Yes	No	Living	Tumor free	0	0	0	0	0	0	0	4.5	nonhyper	MSS	MSS	CMS2	E	CIN	-1196.47	-100.377
X14CO003	One Year	503	0	503	Living	#N/A	2	1	1	1	1	1	1	1	#N/A	1	#N/A	75	Female	Mucinous	Tranverse Colon	T3	N2b	3	0.3	No	Yes	#N/A	#N/A	Yes	No	Living	Tumor free	0	0	0	0	0	0	1	29.9333	hyper	MSI-high	MSI-H	#N/A	E	#N/A	-372.181	628.343
X14CO005	One Year	466	0	466	Living	#N/A	2	1	1	1	1	1	1	1	1	1	1	75	Female	Mucinous	Cecum	T3	N0	2	15.5	No	No	Yes	No	No	No	Living	Tumor free	0	0	0	0	1	0	0	4.43333	nonhyper	MSS	MSS	CMS2	#N/A	CIN	-114.956	715.906
X15CO001	One Year	352	0	352	Living	#N/A	2	1	1	1	1	1	1	1	1	1	1	57	Female	Mucinous	Sigmoid Colon	T3	N1a	3	0.7	No	No	No	Yes	No	No	Living	Tumor free	0	0	0	0	1	0	0	3.8	nonhyper	MSS	MSS	#N/A	C	#N/A	-166.186	-265.182
X15CO002	One Year	320	0	320	Living	#N/A	2	1	1	1	1	1	1	1	1	1	1	53	Female	Not Mucinous	Hepatix Flexure	T4a	N0	2	0.6	No	No	No	No	Yes	No	Living	Tumor free	0	0	0	0	0	0	0	3.7	nonhyper	MSS	MSS	#N/A	A	CIN	168.801	918.164
X16CO002	One Year	420	0	420	Living	#N/A	2	1	1	1	1	1	1	1	1	1	1	68	Male	Not Mucinous	Splenic Flexure	T3	N1	3	#N/A	No	Yes	#N/A	No	No	No	Living	Tumor free	0	0	0	0	0	0	0	3.3	nonhyper	MSS	MSS	CMS2	#N/A	CIN	-278.621	-59.3063
X16CO003	One Year	376	0	376	Living	#N/A	2	1	1	1	1	1	1	1	1	1	1	63	Female	Not Mucinous	Sigmoid Colon	T3	N0	2	#N/A	No	Yes	#N/A	No	No	No	Living	Tumor free	0	0	0	0	0	0	0	5.66667	nonhyper	MSS	MSS	CMS4	C	Mesenchymal	764.454	1158.53
X16CO006	One Year	177	0	177	Living	#N/A	2	1	1	1	1	1	1	1	1	1	1	64	Male	Not Mucinous	Hepatix Flexure	T3	N0	4	#N/A	No	Yes	#N/A	No	No	No	Living	With tumor	0	0	0	0	1	0	0	6.96667	nonhyper	MSS	MSS	CMS2	B	CIN	158.995	815.984
X16CO011	One Year	420	0	420	Living	#N/A	2	1	1	1	1	1	1	1	1	1	1	59	Male	Not Mucinous	Ascending Colon	T3	N1	3	#N/A	No	Yes	#N/A	No	No	No	Living	Tumor free	0	0	0	0	0	0	0	7.06667	nonhyper	MSS	MSS	#N/A	C	#N/A	435.871	890.675
X20CO001	One Year	352	0	352	Living	#N/A	2	1	1	1	1	1	1	1	1	1	1	54	Female	Not Mucinous	Ascending Colon	T3	N1a	3	21.1	No	No	No	No	#N/A	No	Living	Tumor free	0	0	0	0	1	0	0	5.83333	nonhyper	#N/A	MSS	CMS4	C	Mesenchymal	1106.98	1051.34
X20CO003	One Year	#N/A	1	317	Deceased	317	2	1	1	1	1	1	1	1	1	1	1	60	Female	Not Mucinous	Descending Colon	T4a	N1b	4	3.2	No	No	No	No	#N/A	No	Deceased	With tumor	1	1	1	0	0	0	0	60.3	hyper	#N/A	MSI-H	CMS4	C	Mesenchymal	979.819	2064.5
X20CO004	One Year	347	0	347	Living	#N/A	1	1	1	1	1	1	1	1	1	1	1	56	Male	Not Mucinous	Cecum	T4a	N2b	3	14.5	Yes	Yes	Yes	No	#N/A	No	Living	With tumor	0	0	0	0	1	0	0	7	nonhyper	MSS	MSS	CMS2	E	CIN	-1046.68	-641.653
X20CO006	One Year	308	0	308	Living	#N/A	1	1	#N/A	#N/A	#N/A	#N/A	1	1	1	1	1	58	Male	Not Mucinous	Cecum	T3	N1a	4	4.8	No	No	No	No	#N/A	Yes	Living	With tumor	#N/A	#N/A	#N/A	#N/A	#N/A	#N/A	#N/A	#N/A	#N/A	#N/A	#N/A	#N/A	E	CIN	#N/A	#N/A
X20CO007	One Year	278	0	278	Living	#N/A	1	1	1	1	1	1	1	1	1	1	1	55	Male	Not Mucinous	Descending Colon	T3	N0	2	13.7	No	No	No	No	Yes	Yes	Living	Tumor free	0	0	0	0	1	0	0	15.5	nonhyper	MSS	MSS	CMS3	E	CIN	-637.642	557.646
X21CO006	One Year	367	0	367	Living	#N/A	1	1	1	1	1	1	1	1	1	1	1	76	Male	Not Mucinous	Sigmoid Colon	T2	N0	1	3.6	No	No	No	No	Yes	Yes	Living	#N/A	0	0	0	0	0	0	0	3.6	nonhyper	#N/A	MSS	CMS4	C	Mesenchymal	537.493	1100.12
X21CO007	One Year	278	0	278	Living	#N/A	1	1	1	1	1	1	1	1	1	1	1	50	Male	Not Mucinous	Sigmoid Colon	T4a	N2a	4	39.6	Yes	Yes	No	No	No	#N/A	Living	#N/A	0	0	0	0	1	0	0	5.16667	nonhyper	#N/A	MSS	CMS2	E	CIN	-275.22	130.388
X22CO004	One Year	345	0	345	Living	#N/A	1	1	1	1	1	1	1	1	1	1	1	52	Male	Not Mucinous	Sigmoid Colon	T3	N0	2	#N/A	No	No	No	No	Yes	Yes	Living	Tumor free	1	0	0	0	0	0	0	3.66667	nonhyper	MSS	MSS	#N/A	E	CIN	-836.916	531.426
X22CO006	One Year	333	1	402	Deceased	402	1	1	1	1	1	1	1	1	1	1	1	57	Female	Not Mucinous	Ascending Colon	T3	N2b	3	#N/A	Yes	Yes	Yes	No	#N/A	No	Living	With tumor	1	0	1	0	0	0	1	39.4667	hyper	MSI-high	MSI-H	CMS4	C	Mesenchymal	1346.83	2113.51
X27CO004	One Year	434	0	434	Living	#N/A	1	1	1	1	1	1	1	1	1	1	1	51	Female	Not Mucinous	Cecum	T3	N2a	3	#N/A	Yes	Yes	#N/A	#N/A	#N/A	No	Living	Tumor free	0	0	0	0	1	0	0	4.83333	nonhyper	MSS	MSS	#N/A	C	#N/A	393.043	653.126
[truncated: 3 more columns]

## Sheet: Table S2c
TCGA-participant-ID	Mutation.burden	Cluster
TCGA-AA-3526	1.23684	I
TCGA-AA-3531	1.5	I
TCGA-AA-3558	2.5	I
TCGA-AA-3561	0.973684	I
TCGA-AA-3664	3.36842	I
TCGA-AA-3666	3.47368	I
TCGA-AA-3672	36.1579	I
TCGA-AA-3695	3.60526	I
TCGA-AA-3710	25.6053	I
TCGA-AA-3848	2.84211	I
TCGA-AA-3864	51.5789	I
TCGA-AA-3989	2.78947	I
TCGA-AA-A00E	12.4211	I
TCGA-AA-A00J	22.8684	I
TCGA-AA-A00R	7.92105	I
TCGA-AA-A00U	1.76316	I
TCGA-AA-A017	1.39474	I
TCGA-AA-A01F	1.26316	I
TCGA-AA-A01I	2.28947	I
TCGA-AA-A01R	32.4737	I
TCGA-AA-A01S	1.21053	I
TCGA-AA-A01T	2.10526	I
TCGA-AA-A01X	1.26316	I
TCGA-AA-A01Z	2.10526	I
TCGA-AA-A022	24.0789	I
TCGA-AA-A029	2.39474	I
TCGA-AA-A02H	1.65789	I
TCGA-AA-A02J	3.10526	I
TCGA-AA-A02O	3.55263	I
TCGA-AA-A02Y	2.73684	I
TCGA-AA-A03J	1.73684	I
TCGA-AF-2691	1.52632	I
TCGA-AF-2692	0.921053	I
TCGA-AG-3580	0.842105	I
TCGA-AG-3584	0.789474	I
TCGA-AG-3593	1.57895	I
TCGA-AG-3594	0.842105	I
TCGA-AG-4007	3.44737	I
TCGA-AG-A002	259.553	I
TCGA-AG-A008	1.02632	I
TCGA-AG-A00C	1.36842	I
TCGA-AG-A00H	1.47368	I
TCGA-AG-A00Y	5.10526	I
TCGA-AG-A011	2.39474	I
TCGA-AG-A014	3.52632	I
TCGA-AG-A016	1.02632	I
TCGA-AG-A01L	1.60526	I
TCGA-AG-A01N		I
TCGA-AG-A01W	2.55263	I
TCGA-AG-A020	1.57895	I
TCGA-AG-A026	4.57895	I
TCGA-AG-A02N	23.9474	I
TCGA-AG-A02X	2.84211	I
TCGA-AG-A032	1.86842	I
TCGA-AG-A036	2.92105	I
TCGA-A6-3807	2.10526	II
TCGA-A6-3808	2.63158	II
TCGA-A6-3810	2.57895	II
TCGA-AA-3518	11.3158	II
TCGA-AA-3525	12.3421	II
TCGA-AA-3529	1.15789	II
TCGA-AA-3534	1.36842	II
TCGA-AA-3552	1.15789	II
TCGA-AA-3554	6.39474	II
TCGA-AA-3684	2.5	II
TCGA-AA-3715	39.5526	II
TCGA-AA-3818	2.68421	II
TCGA-AA-3986	1.57895	II
TCGA-AA-A004	1.52632	II
TCGA-AA-A00A	8.89474	II
TCGA-AA-A00F	0.842105	II
TCGA-AA-A00K	3.68421	II
TCGA-AA-A00N	97.9737	II
TCGA-AA-A00O	1.89474	II
TCGA-AA-A010	161.921	II
TCGA-AA-A01C		II
TCGA-AA-A01D	4	II
TCGA-AA-A01K	3.86842	II
TCGA-AA-A01P	10.1316	II
TCGA-AA-A01V	2.57895	II
TCGA-AA-A024	1.65789	II
TCGA-AA-A02E		II
TCGA-AA-A02R		II
TCGA-AA-A03F	2.76316	II
TCGA-AF-3400	0.526316	II
TCGA-AF-3913	2.28947	II
TCGA-AG-3574	0.842105	II
TCGA-AG-A015	1.36842	II
TCGA-AG-A01J		II
TCGA-AG-A01Y	1.76316	II

## Sheet: Table S2d
Proteome_fno_T	Mutation_burden	RF-Cluster
01CO001	2.02632	II
01CO005	3.55263	II
01CO006	2.21053	II
01CO008	4.13158	II
01CO015	3.44737	I
01CO019	2.97368	I
01CO022	53.8158	I
05CO002	2.76316	II
05CO003	19.1316	I
05CO004		I
05CO006	25.0789	II
05CO007	25.1579	II
05CO011	2.60526	I
05CO015	38.3684	I
05CO020	7.36842	I
05CO026	3.5	I
05CO028	6.73684	I
05CO029	3.18421	I
05CO032	25.3684	I
05CO033	4.28947	II
05CO034	2.34211	I
05CO035	5.5	I
05CO037	31.4211	II
05CO039	33.3421	I
05CO041	47	I
05CO044	67.0263	II
05CO045	4.55263	I
05CO048	30.4474	I
05CO049	4.05263	I
05CO050	54.5789	II
05CO053	3	I
05CO054	6.94737	I
06CO001	2.47368	I
06CO002	3.23684	II
09CO005	2.92105	II
09CO006	2.65789	I
09CO008	3.78947	I
09CO011	2.44737	I
09CO013	3.84211	I
09CO014	6.13158	I
09CO015	2.94737	I
09CO018	3.44737	I
09CO019	3.52632	I
09CO022	3.86842	I
11CO005	1.97368	II
11CO007	51.5789	I
11CO008	2.73684	II
11CO010	2.57895	I
11CO018	50.5789	I
11CO019	3.84211	I
11CO020	4.02632	II
11CO021	2.97368	I
11CO022	3.60526	I
11CO027	4.05263	I
11CO030	2.36842	II
11CO031	26.3158	I
11CO032	2.39474	II
11CO033	48.2632	II
11CO036	49.1053	I
11CO037	2.68421	II
11CO039	5.21053	I
11CO042	4.21053	I
11CO043	2.73684	I
11CO044	4.65789	I
11CO045	5.15789	II
11CO047	3.15789	I
11CO048	3.78947	II
11CO052	4.23684	I
11CO053	6.05263	I
11CO054	2.89474	I
11CO057	3.15789	I
11CO058	2.57895	II
11CO060	3.39474	I
11CO061	19.8158	II
11CO062	2.78947	I
11CO070	253.605	I
11CO072	3.94737	I
11CO077	3.65789	II
11CO079	2.52632	II
14CO002	3	I
14CO003	21.8158	I
14CO005	2.68421	II
15CO001	2.26316	I
15CO002	2.34211	I
16CO002	1.86842	II
16CO003	3.68421	II
16CO006	4.18421	I
16CO011	4.5	II
20CO001	3.63158	II
20CO003	41.0789	II
20CO004	4.34211	I
20CO006		I
20CO007	7.5	I
21CO006	2.39474	II
21CO007	3.52632	I
22CO004	2.42105	I
22CO006	28.3684	II
27CO004	3.18421	II

## Sheet: Table S2e
Gene	p value	fdr_BH	fdr	fcSR	meanC1	meanC2	fcSR2	medianC1	medianC2	type
APEX1	0.484309	0.65906	0.65906	-0.0616788	4.45894	4.39726	0.015623	4.44312	4.45874	2014 CPTAC-CRC
APTX	0.0506871	0.12624	0.12624	-0.346115	0.383639	0.0375242	0	0	0	2014 CPTAC-CRC
ASCC3	0.0110894	0.0403833	0.0403833	-0.453768	1.49361	1.03985	-0.516366	1.59756	1.0812	2014 CPTAC-CRC
ATM	0.422537	0.580988	0.580988	-0.187142	1.24266	1.05552	-0.18799	1.21805	1.03006	2014 CPTAC-CRC
ATR	0.516282	0.674745	0.674745	0.056384	0.491853	0.548237	0.0151069	0	0.0151069	2014 CPTAC-CRC
ATRIP	0.0768805	0.179527	0.179527	0.0724883	0.126171	0.198659	0	0	0	2014 CPTAC-CRC
ATRX	0.13013	0.241933	0.241933	-0.320711	1.265	0.94429	-0.422691	1.40742	0.984733	2014 CPTAC-CRC
BABAM1	0.713974	0.834023	0.834023	0.0707559	1.08992	1.16068	0.160465	1.21805	1.37851	2014 CPTAC-CRC
BCAS2	0.499939	0.666585	0.666585	-0.0379432	1.4999	1.46196	-0.0724087	1.59002	1.51761	2014 CPTAC-CRC
BLM	0.526657	0.67773	0.67773	0.0472666	0.559286	0.606553	-0.498119	0.528177	0.0300572	2014 CPTAC-CRC
BRCA2	0.255122	0.400907	0.400907	0.0393647	0.197984	0.237349	0	0	0	2014 CPTAC-CRC
BRCC3	0.270899	0.415799	0.415799	-0.240911	0.994645	0.753735	-0.098718	0.992387	0.893669	2014 CPTAC-CRC
BRE	0.0813445	0.181551	0.181551	0.16724	1.40632	1.57356	0.240204	1.53867	1.77887	2014 CPTAC-CRC
CCNH	0.379862	0.545019	0.545019	0.0618563	0.23569	0.297546	0	0	0	2014 CPTAC-CRC
CDC5L	4.07641e-08	2.69043e-06	2.69043e-06	-0.689799	3.85381	3.16402	-0.616813	3.82996	3.21314	2014 CPTAC-CRC
CDK7	0.0314738	0.092323	0.092323	-0.374225	0.830397	0.456172	-0.889576	0.889576	0	2014 CPTAC-CRC
CETN2	0.747527	0.836216	0.836216	0.0334694	0.49642	0.52989	-0.498119	0.528177	0.0300572	2014 CPTAC-CRC
CHEK1	0.415906	0.578286	0.578286	-0.0178662	0.115457	0.0975913	0	0	0	2014 CPTAC-CRC
CHEK2	0.0531116	0.129828	0.129828	-0.295802	0.371616	0.0758143	0	0	0	2014 CPTAC-CRC
CUL3	0.000100207	0.00101749	0.00101749	-0.291634	3.29173	3.0001	-0.340587	3.34154	3.00095	2014 CPTAC-CRC
CUL4A	0.0183309	0.0576115	0.0576115	-0.414161	3.21643	2.80226	-0.399045	3.28657	2.88753	2014 CPTAC-CRC
CUL5	0.125317	0.236312	0.236312	-0.296904	1.23668	0.939777	-0.129283	1.14439	1.01511	2014 CPTAC-CRC
DDB1	0.00386978	0.0159628	0.0159628	-0.30029	5.06093	4.76064	-0.321158	5.1083	4.78715	2014 CPTAC-CRC
DDB2	0.949164	0.978473	0.978473	-0.0953621	0.209886	0.114524	0	0	0	2014 CPTAC-CRC
DUT	0.762573	0.845879	0.845879	-0.0850835	3.12036	3.03527	-0.0600138	3.17666	3.11664	2014 CPTAC-CRC
ERCC2	0.917489	0.970508	0.970508	-0.0260452	0.344727	0.318681	0	0	0	2014 CPTAC-CRC
ERCC3	0.684732	0.807005	0.807005	-0.09831	0.191138	0.0928275	0	0	0	2014 CPTAC-CRC
FANCD2	0.514776	0.674745	0.674745	-0.0458359	0.0983596	0.0525237	0	0	0	2014 CPTAC-CRC
FANCI	0.223609	0.364399	0.364399	-0.151724	1.6856	1.53388	-0.0622155	1.69693	1.63472	2014 CPTAC-CRC
FEN1	0.000257984	0.00189188	0.00189188	-0.474758	3.54835	3.07359	-0.391857	3.62613	3.23427	2014 CPTAC-CRC
GTF2H2	0.392967	0.55776	0.55776	-0.148114	0.228101	0.0799872	0	0	0	2014 CPTAC-CRC
H2AFX	0.000117474	0.00110762	0.00110762	-0.340419	8.6069	8.26648	-0.284594	8.64575	8.36116	2014 CPTAC-CRC
HERC2	0.120596	0.234098	0.234098	-0.234933	0.435432	0.2005	0	0	0	2014 CPTAC-CRC
HLTF	0.0830094	0.181551	0.181551	0.175551	0.502935	0.678486	0.839535	0	0.839535	2014 CPTAC-CRC
HMGB1	0.103866	0.210927	0.210927	-0.174231	6.26662	6.09239	-0.21569	6.23911	6.02342	2014 CPTAC-CRC
HMGB2	0.562343	0.693731	0.693731	-0.0529167	4.89859	4.84567	-0.102008	4.98233	4.88033	2014 CPTAC-CRC
IDH1	0.0851459	0.181551	0.181551	0.184487	4.87015	5.05463	0.181425	4.926	5.10742	2014 CPTAC-CRC
KAT5	0.551697	0.693563	0.693563	-0.0201086	0.0763582	0.0562496	0	0	0	2014 CPTAC-CRC
LIG1	3.86919e-05	0.000567482	0.000567482	-0.789552	1.72083	0.931282	-0.685685	1.67807	0.992387	2014 CPTAC-CRC
LIG3	1.38998e-05	0.000305796	0.000305796	-0.655757	2.31959	1.66384	-0.64689	2.32496	1.67807	2014 CPTAC-CRC
LIG4	0.000145904	0.00128395	0.00128395	0.692357	0.863628	1.55598	0.891224	0.91396	1.80518	2014 CPTAC-CRC
MDC1	0.0459398	0.118903	0.118903	-0.501119	1.48919	0.98807	-0.285402	1.30051	1.01511	2014 CPTAC-CRC
MGMT	0.94042	0.977444	0.977444	-0.0106504	1.56618	1.55553	-0.0188589	1.69693	1.67807	2014 CPTAC-CRC
MLH1	0.363382	0.527103	0.527103	-0.041572	0.0445756	0.00300358	0	0	0	2014 CPTAC-CRC
MMS19	0.529327	0.67773	0.67773	0.117124	2.40488	2.52201	0.0331086	2.55943	2.59254	2014 CPTAC-CRC
MORF4L1	0.184779	0.310977	0.310977	-0.170036	0.17304	0.00300358	0	0	0	2014 CPTAC-CRC
MPG	0.000378153	0.00262717	0.00262717	-0.589557	1.3474	0.757838	-0.370519	1.30051	0.92999	2014 CPTAC-CRC
MRE11A	0.280094	0.424971	0.424971	-0.126559	2.78542	2.65886	-0.119161	2.91999	2.80083	2014 CPTAC-CRC
MRPL40	0.00101531	0.00609187	0.00609187	-0.556367	2.06796	1.51159	-0.516944	2.19502	1.67807	2014 CPTAC-CRC
MSH2	0.00630797	0.0247255	0.0247255	-0.546344	2.70326	2.15692	-0.708746	2.82889	2.12014	2014 CPTAC-CRC
MSH3	0.0144105	0.0487741	0.0487741	-0.369025	0.480731	0.111707	0	0	0	2014 CPTAC-CRC
MSH6	6.06245e-05	0.000727494	0.000727494	-0.844393	2.6843	1.83991	-0.860726	2.6396	1.77887	2014 CPTAC-CRC
NBN	0.00255645	0.0116363	0.0116363	-0.616442	1.58925	0.972807	-0.76641	1.79647	1.03006	2014 CPTAC-CRC
NFATC2IP	0.115478	0.22751	0.22751	-0.201658	0.272411	0.0707527	0	0	0	2014 CPTAC-CRC
NHEJ1	0.168323	0.304364	0.304364	0.104328	0.603775	0.708103	0.253448	0.668549	0.921998	2014 CPTAC-CRC
NTHL1	0.186115	0.310977	0.310977	-0.209959	0.452378	0.242419	0	0	0	2014 CPTAC-CRC
NUDT15	0.267649	0.415643	0.415643	-0.202348	0.288169	0.0858216	0	0	0	2014 CPTAC-CRC
PARG	0.218378	0.360324	0.360324	-0.211178	0.46053	0.249352	0	0	0	2014 CPTAC-CRC
PARP1	0.000219394	0.00170353	0.00170353	-0.386364	5.4259	5.03954	-0.317227	5.34752	5.03029	2014 CPTAC-CRC
PARP4	0.000944529	0.00593704	0.00593704	-0.495388	4.53295	4.03756	-0.401734	4.48203	4.0803	2014 CPTAC-CRC
PCNA	0.00367047	0.0156291	0.0156291	-0.285519	4.88627	4.60075	-0.232987	4.91698	4.68399	2014 CPTAC-CRC
PLRG1	0.00117629	0.00632786	0.00632786	-0.441522	2.11142	1.6699	-0.551354	2.22943	1.67807	2014 CPTAC-CRC
PNKP	0.0395939	0.106661	0.106661	-0.390351	1.02866	0.63831	-1.00749	1.0226	0.0151069	2014 CPTAC-CRC
POLA1	0.00343758	0.0151254	0.0151254	-0.341706	0.434692	0.0929862	0	0	0	2014 CPTAC-CRC
POLD1	0.00107802	0.00618692	0.00618692	-0.46776	2.49171	2.02395	-0.569614	2.562	1.99239	2014 CPTAC-CRC
POLD2	0.0858846	0.181551	0.181551	-0.243521	1.64879	1.40527	-0.290038	1.66855	1.37851	2014 CPTAC-CRC
POLD3	0.111195	0.222391	0.222391	-0.221363	0.917314	0.695951	-0.0703893	0.992387	0.921998	2014 CPTAC-CRC
POLE	0.239753	0.381295	0.381295	-0.177402	0.204392	0.0269903	0	0	0	2014 CPTAC-CRC
POLE3	0.0325627	0.0934408	0.0934408	-0.424768	1.24943	0.824667	-0.29716	1.28189	0.984733	2014 CPTAC-CRC
POLE4	0.178669	0.31032	0.31032	0.00171255	0.0833558	0.0850683	0	0	0	2014 CPTAC-CRC
POLG	0.665585	0.796422	0.796422	-0.0475294	0.211917	0.164388	0	0	0	2014 CPTAC-CRC
POLQ	0.284838	0.427257	0.427257	0.0090202	0.0942604	0.103281	0	0	0	2014 CPTAC-CRC
PPP4C	0.610735	0.746454	0.746454	-0.0885329	2.3869	2.29837	-0.216133	2.59756	2.38143	2014 CPTAC-CRC
PPP4R1	0.490721	0.660971	0.660971	0.102724	0.885549	0.988273	0	0.984733	0.984733	2014 CPTAC-CRC
PPP4R2	0.184028	0.310977	0.310977	-0.25445	1.05199	0.797545	-0.173483	1.09548	0.921998	2014 CPTAC-CRC
PRKDC	2.47285e-08	2.69043e-06	2.69043e-06	-0.594459	7.66785	7.07339	-0.635416	7.7066	7.07118	2014 CPTAC-CRC
PRPF19	0.0358913	0.0987011	0.0987011	-0.250617	4.62631	4.37569	-0.126674	4.59505	4.46838	2014 CPTAC-CRC
PTEN	0.919042	0.970508	0.970508	-0.0594619	0.664978	0.605516	-0.0687127	0.856409	0.787696	2014 CPTAC-CRC
RAD23A	0.937325	0.977444	0.977444	-0.077539	2.26395	2.18641	0.0031198	2.28189	2.28501	2014 CPTAC-CRC
RAD23B	0.645977	0.782284	0.782284	-0.00100026	4.1274	4.12639	-0.112182	4.18753	4.07535	2014 CPTAC-CRC
RAD50	3.49747e-05	0.000567482	0.000567482	-0.579927	3.86423	3.28431	-0.660039	3.99858	3.33854	2014 CPTAC-CRC
RBX1	0.848409	0.917951	0.917951	-0.0895565	1.12821	1.03865	-0.023903	1.16485	1.14095	2014 CPTAC-CRC
RECQL	0.725016	0.836216	0.836216	0.0553057	3.58382	3.63912	-0.008592	3.73278	3.72419	2014 CPTAC-CRC
RECQL4	0.533969	0.67773	0.67773	-0.0595727	0.123152	0.0635791	0	0	0	2014 CPTAC-CRC
RFC1	0.000657473	0.00433932	0.00433932	-0.545994	0.847831	0.301837	-0.91396	0.91396	0	2014 CPTAC-CRC
RFC2	0.00199033	0.00973048	0.00973048	-0.562532	2.20056	1.63802	-0.583426	2.30359	1.72016	2014 CPTAC-CRC
RFC3	0.41619	0.578286	0.578286	-0.145509	1.24817	1.10266	-0.0971412	1.17834	1.0812	2014 CPTAC-CRC
RFC4	1.2391e-05	0.000305796	0.000305796	-0.89718	2.35371	1.45653	-0.77976	2.33403	1.55427	2014 CPTAC-CRC
RFC5	0.172912	0.308437	0.308437	-0.292086	1.3494	1.05731	-0.404231	1.48543	1.0812	2014 CPTAC-CRC
RIF1	0.00636868	0.0247255	0.0247255	-0.567466	1.5082	0.940736	-0.559959	1.59002	1.03006	2014 CPTAC-CRC
RMI2	0.815988	0.897587	0.897587	-0.0681593	0.22342	0.155261	0	0	0	2014 CPTAC-CRC
RNMT	0.077523	0.179527	0.179527	-0.267557	0.590801	0.323244	-0.668549	0.668549	0	2014 CPTAC-CRC
RPA1	0.0113196	0.0403833	0.0403833	-0.211412	4.09583	3.88442	-0.291373	4.14095	3.84958	2014 CPTAC-CRC
RPA2	0.0128755	0.0447254	0.0447254	0.393756	2.31426	2.70802	0.466165	2.23428	2.70044	2014 CPTAC-CRC
RPA3	0.00185312	0.00940817	0.00940817	0.490461	1.52677	2.01723	0.480626	1.66376	2.14439	2014 CPTAC-CRC
RRM1	5.17643e-05	0.000683289	0.000683289	-0.923689	2.62029	1.6966	-0.935679	2.79209	1.85641	2014 CPTAC-CRC
RRM2	3.71289e-07	1.22525e-05	1.22525e-05	-1.09777	2.41821	1.32044	-1.0823	2.46081	1.37851	2014 CPTAC-CRC
RRM2B	0.0105539	0.0398033	0.0398033	0.246469	0.505062	0.751531	0.921998	0	0.921998	2014 CPTAC-CRC
SMARCA4	3.20602e-07	1.22525e-05	1.22525e-05	-0.867971	2.92302	2.05505	-0.743925	3.00379	2.25987	2014 CPTAC-CRC
SMARCAD1	0.0735756	0.176582	0.176582	-0.240445	0.324305	0.0838595	0	0	0	2014 CPTAC-CRC
SMARCC1	0.0451774	0.118903	0.118903	-0.276272	2.99202	2.71575	-0.274769	3.05585	2.78108	2014 CPTAC-CRC
SMC5	0.736131	0.836216	0.836216	0.0428599	0.458497	0.501357	0	0	0	2014 CPTAC-CRC
SMC6	0.669719	0.796422	0.796422	-0.0418555	0.200445	0.158589	0	0	0	2014 CPTAC-CRC
TCEA1	0.123682	0.236312	0.236312	-0.346826	2.64833	2.3015	-0.129525	2.55685	2.42732	2014 CPTAC-CRC
TCEB1	0.0310756	0.092323	0.092323	0.323432	2.79321	3.11664	0.200874	2.96736	3.16824	2014 CPTAC-CRC
TCEB2	0.145194	0.266188	0.266188	-0.159996	3.53534	3.37534	-0.190649	3.57862	3.38797	2014 CPTAC-CRC
TCEB3	0.0852616	0.181551	0.181551	0.0342133	0.143151	0.177364	0	0	0	2014 CPTAC-CRC
TDP1	0.0339227	0.0952722	0.0952722	0.0422668	0.0260716	0.0683384	0	0	0	2014 CPTAC-CRC
TDP2	0.558015	0.693731	0.693731	-0.152036	0.252956	0.10092	0	0	0	2014 CPTAC-CRC
TELO2	0.91193	0.970508	0.970508	-0.00648995	0.577091	0.570601	0.0151069	0	0.0151069	2014 CPTAC-CRC
TOP3B	0.0233527	0.0716873	0.0716873	0.0746349	0.078358	0.152993	0	0	0	2014 CPTAC-CRC
TP53	0.956238	0.978473	0.978473	-0.145457	0.366102	0.220645	0	0	0	2014 CPTAC-CRC
TP53BP1	0.98019	0.98019	0.98019	0.00232486	2.574	2.57632	-0.0615095	2.59756	2.53605	2014 CPTAC-CRC
TTK	0.978461	0.98019	0.98019	-0.0351329	0.20358	0.168447	0	0	0	2014 CPTAC-CRC
TYMS	0.178669	0.31032	0.31032	0.00913889	0.0717387	0.0808776	0	0	0	2014 CPTAC-CRC
UBE2A	0.0149575	0.0493599	0.0493599	-0.385154	1.27849	0.893333	-0.403542	1.39593	0.992387	2014 CPTAC-CRC
UBE2B	0.741884	0.836216	0.836216	-0.0430702	0.243635	0.200564	0	0	0	2014 CPTAC-CRC
UBE2N	0.324643	0.481493	0.481493	0.094004	4.71232	4.80632	0.037632	4.69429	4.73193	2014 CPTAC-CRC
UBE2V2	0.089743	0.185095	0.185095	0.17519	3.25227	3.42746	0.186263	3.20822	3.39448	2014 CPTAC-CRC
UNG	0.00119846	0.00632786	0.00632786	-0.535619	1.01541	0.479787	-0.97728	0.992387	0.0151069	2014 CPTAC-CRC
WDR48	0.016413	0.0528419	0.0528419	-0.305156	0.38365	0.0784939	0	0	0	2014 CPTAC-CRC
WEE1	0.0474912	0.120555	0.120555	0.309257	0.67518	0.984437	0.178538	0.813849	0.992387	2014 CPTAC-CRC
WRN	0.738372	0.836216	0.836216	-0.0418462	0.506345	0.464499	0	0	0	2014 CPTAC-CRC
XAB2	0.000219104	0.00170353	0.00170353	-0.755873	1.80112	1.04524	-0.773148	1.76553	0.992387	2014 CPTAC-CRC
XPC	0.233136	0.375292	0.375292	-0.241754	0.955178	0.713424	-0.169925	0.992387	0.822462	2014 CPTAC-CRC
XRCC1	6.85778e-05	0.000754356	0.000754356	-0.553889	2.55635	2.00246	-0.597368	2.61997	2.0226	2014 CPTAC-CRC
XRCC4	0.963647	0.978473	0.978473	0.0623243	1.71086	1.77318	0.030162	1.90182	1.93198	2014 CPTAC-CRC
XRCC5	0.00248436	0.0116363	0.0116363	-0.190007	6.22071	6.0307	-0.205016	6.27269	6.06768	2014 CPTAC-CRC
XRCC6	3.37095e-05	0.000567482	0.000567482	-0.231713	6.34951	6.1178	-0.255621	6.38143	6.12581	2014 CPTAC-CRC
YWHAB	0.0866493	0.181551	0.181551	-0.0827236	6.42369	6.34097	-0.153403	6.41989	6.26649	2014 CPTAC-CRC
YWHAE	0.345362	0.506531	0.506531	0.0902076	6.57376	6.66397	0.061805	6.5897	6.65151	2014 CPTAC-CRC
YWHAG	0.832837	0.908549	0.908549	0.0250514	6.00666	6.03171	-0.086525	6.03852	5.95199	2014 CPTAC-CRC
APEX1	0.810894	0.823765	0.823765	-0.00764082	5.17053	5.14322	-0.0131333	5.17136	5.1245	2019 CPTAC-CRC Label free
ASCC3	0.315579	0.388405	0.388405	-0.176191	2.26241	2.00231	-0.0282044	2.33432	2.28912	2019 CPTAC-CRC Label free
ATM	0.0592556	0.130771	0.130771	-0.481025	1.43247	1.02632	-3.245	1.52417	0.160764	2019 CPTAC-CRC Label free
BCAS2	0.120294	0.197405	0.197405	0.158345	1.70666	1.90465	0.0668359	1.72283	1.80452	2019 CPTAC-CRC Label free
BRCC3	0.166191	0.25165	0.25165	-0.33597	1.37394	1.08851	-0.0603948	1.51099	1.44904	2019 CPTAC-CRC Label free
BRE	0.093951	0.168507	0.168507	0.143562	2.09069	2.30943	0.168586	2.15709	2.42448	2019 CPTAC-CRC Label free
CDC5L	2.80098e-05	0.000597541	0.000597541	-0.216015	4.22773	3.63982	-0.195978	4.28437	3.74017	2019 CPTAC-CRC Label free
CUL3	0.88923	0.88923	0.88923	-0.022342	3.49223	3.43857	0.0382812	3.45615	3.54909	2019 CPTAC-CRC Label free
CUL4A	0.0845433	0.163963	0.163963	-0.148615	2.78867	2.5157	-0.212397	2.87998	2.48572	2019 CPTAC-CRC Label free
CUL5	0.6918	0.731343	0.731343	-0.0591309	2.81128	2.69839	-0.0547592	2.88146	2.77414	2019 CPTAC-CRC Label free
DDB1	0.185194	0.263386	0.263386	-0.0356244	5.2545	5.12634	-0.0265657	5.26686	5.17076	2019 CPTAC-CRC Label free
DUT	0.66305	0.719241	0.719241	-0.0561422	2.3429	2.25348	-0.0947968	2.51639	2.35635	2019 CPTAC-CRC Label free
FEN1	0.0100278	0.0344786	0.0344786	-0.18316	2.96513	2.6116	-0.184239	2.80392	2.46777	2019 CPTAC-CRC Label free
H2AFX	0.097418	0.168507	0.168507	0.218956	1.74705	2.03337	0.362431	1.73576	2.23148	2019 CPTAC-CRC Label free
HMGB1	0.220599	0.288129	0.288129	-0.0401413	5.67222	5.51658	-0.0394242	5.74899	5.59402	2019 CPTAC-CRC Label free
HMGB2	0.00716345	0.0286538	0.0286538	-0.187808	3.85084	3.3808	-0.156313	3.84602	3.45109	2019 CPTAC-CRC Label free
IDH1	0.499698	0.561064	0.561064	0.0068413	4.82845	4.8514	0.0399538	4.814	4.94918	2019 CPTAC-CRC Label free
LIG1	0.184778	0.263386	0.263386	-0.288754	1.39154	1.13912	-1.85926	1.55452	0.428452	2019 CPTAC-CRC Label free
LIG3	0.0125468	0.0401497	0.0401497	-0.353434	2.82064	2.20777	-0.277247	2.95876	2.44147	2019 CPTAC-CRC Label free
MDC1	0.0683619	0.145839	0.145839	-0.459092	1.29951	0.945323	-1.53219	1.37124	0.474108	2019 CPTAC-CRC Label free
MGMT	0.589513	0.650497	0.650497	-0.157393	1.89036	1.69498	-0.248422	2.11267	1.77848	2019 CPTAC-CRC Label free
MMS19	0.343955	0.415341	0.415341	0.0519555	3.32156	3.44336	0.0415244	3.34425	3.4419	2019 CPTAC-CRC Label free
MRPL40	0.139524	0.217794	0.217794	-0.252327	1.67367	1.40512	-0.298958	1.98545	1.61385	2019 CPTAC-CRC Label free
MSH2	0.0102358	0.0344786	0.0344786	-0.313715	3.16871	2.54944	-0.184681	3.19377	2.81002	2019 CPTAC-CRC Label free
MSH6	0.169077	0.25165	0.25165	-0.187617	2.28089	2.00275	-0.162364	2.40055	2.14503	2019 CPTAC-CRC Label free
NBN	0.0940193	0.168507	0.168507	-0.449919	1.44132	1.05517	-0.217259	1.5679	1.3487	2019 CPTAC-CRC Label free
PARP1	0.033004	0.0844904	0.0844904	-0.0673251	5.51822	5.26662	-0.0862853	5.48874	5.17009	2019 CPTAC-CRC Label free
PARP4	0.0579162	0.130771	0.130771	-0.102111	4.82291	4.49336	-0.0864564	4.8485	4.56648	2019 CPTAC-CRC Label free
PCNA	0.490666	0.560761	0.560761	-0.0284526	4.02879	3.95011	-0.0246293	4.03723	3.96889	2019 CPTAC-CRC Label free
PLRG1	0.00120471	0.00771013	0.00771013	-0.636538	1.96545	1.26429	-0.661433	2.31626	1.46446	2019 CPTAC-CRC Label free
PNKP	0.468469	0.545128	0.545128	-0.1037	2.29475	2.1356	-0.0937431	2.41695	2.2649	2019 CPTAC-CRC Label free
POLD1	1.42776e-05	0.000555979	0.000555979	-0.616012	2.82354	1.84228	-0.40839	2.8297	2.13207	2019 CPTAC-CRC Label free
POLD2	0.798868	0.823765	0.823765	-0.136543	1.35413	1.23184	0.116652	1.48611	1.61126	2019 CPTAC-CRC Label free
PPP4R1	0.00831119	0.0312892	0.0312892	0.293742	1.75897	2.15617	0.268918	1.86118	2.24254	2019 CPTAC-CRC Label free
PRKDC	0.00191302	0.00977615	0.00977615	-0.05856	8.01693	7.69804	-0.0671214	7.96254	7.60057	2019 CPTAC-CRC Label free
PRPF19	0.00165368	0.00962143	0.00962143	-0.117214	4.42911	4.08349	-0.113915	4.45566	4.11737	2019 CPTAC-CRC Label free
RAD23A	0.697061	0.731343	0.731343	-0.0805906	2.52803	2.39068	-0.000670178	2.69904	2.69779	2019 CPTAC-CRC Label free
RAD23B	0.112014	0.188655	0.188655	0.0593017	3.91352	4.07774	0.078073	3.89864	4.11543	2019 CPTAC-CRC Label free
RAD50	1.73743e-05	0.000555979	0.000555979	-0.265791	3.93368	3.27181	-0.24364	4.12724	3.48592	2019 CPTAC-CRC Label free
RECQL	0.298697	0.374835	0.374835	0.013375	3.44839	3.48051	0.0334935	3.52988	3.61279	2019 CPTAC-CRC Label free
RFC1	0.000984198	0.00699874	0.00699874	-0.685451	1.63042	1.01381	-0.798525	1.73728	0.998827	2019 CPTAC-CRC Label free
RFC2	0.0300917	0.0802444	0.0802444	-0.430115	1.7243	1.27978	-0.306039	1.84738	1.49427	2019 CPTAC-CRC Label free
RFC3	0.0545627	0.129334	0.129334	-0.400344	2.14986	1.6289	-0.21837	2.21441	1.90337	2019 CPTAC-CRC Label free
RFC4	0.00344044	0.0157277	0.0157277	-0.465898	2.14246	1.55119	-0.462987	2.22029	1.61078	2019 CPTAC-CRC Label free
RIF1	0.000107167	0.00137174	0.00137174	-1.10516	1.72023	0.799653	-4.3966	1.85659	0.0881474	2019 CPTAC-CRC Label free
RNMT	0.138115	0.217794	0.217794	0.103859	1.45902	1.56792	0.312487	1.48611	1.84552	2019 CPTAC-CRC Label free
RPA1	0.413463	0.49003	0.49003	-0.00907611	4.01645	3.99126	0.0382262	4.03789	4.14631	2019 CPTAC-CRC Label free
RPA2	0.00545702	0.0232833	0.0232833	0.289317	1.80849	2.21008	0.461972	1.79158	2.46777	2019 CPTAC-CRC Label free
RPA3	0.0816453	0.163291	0.163291	0.228706	1.34625	1.57751	0.153513	1.51519	1.68531	2019 CPTAC-CRC Label free
RRM1	6.21647e-05	0.000994635	0.000994635	-0.628763	3.0344	1.96244	-0.60811	3.28908	2.15782	2019 CPTAC-CRC Label free
RRM2	0.00198578	0.00977615	0.00977615	-0.664483	1.54182	0.972756	-3.32954	1.51099	0.150303	2019 CPTAC-CRC Label free
SMARCA4	0.0191956	0.0585009	0.0585009	-0.628841	1.38825	0.897775	-0.738237	1.41624	0.848996	2019 CPTAC-CRC Label free
SMARCC1	0.037299	0.091813	0.091813	-0.538072	1.69659	1.16843	-0.193486	1.78939	1.5648	2019 CPTAC-CRC Label free
TCEA1	0.0295801	0.0802444	0.0802444	-0.527098	1.70357	1.18219	-0.216773	1.61136	1.38656	2019 CPTAC-CRC Label free
TELO2	0.000809142	0.00647313	0.00647313	-0.977647	1.49177	0.757532	-5.23613	1.65164	0.0438211	2019 CPTAC-CRC Label free
TP53BP1	0.000419829	0.00383844	0.00383844	-0.633802	2.48459	1.60126	-0.593295	2.506	1.66105	2019 CPTAC-CRC Label free
UBE2N	0.025613	0.0745107	0.0745107	0.0704968	4.07301	4.27698	0.100487	4.03366	4.32463	2019 CPTAC-CRC Label free
XAB2	0.0756456	0.156172	0.156172	-0.330464	1.80033	1.43176	-0.141198	1.83933	1.66784	2019 CPTAC-CRC Label free
XRCC1	0.231547	0.29638	0.29638	-0.127348	2.19493	2.00948	-0.168016	2.32804	2.07211	2019 CPTAC-CRC Label free
XRCC5	0.000179507	0.00191474	0.00191474	-0.0679061	6.20535	5.92004	-0.0710966	6.2183	5.91929	2019 CPTAC-CRC Label free
XRCC6	0.199815	0.266421	0.266421	-0.0258205	6.43261	6.3185	-0.0330851	6.43626	6.29033	2019 CPTAC-CRC Label free
YWHAB	0.189977	0.264316	0.264316	0.0415158	4.95409	5.09872	0.071967	4.82942	5.07644	2019 CPTAC-CRC Label free
YWHAE	0.095361	0.168507	0.168507	0.0505867	4.9928	5.17098	0.0562673	5.05673	5.25784	2019 CPTAC-CRC Label free
YWHAG	0.197322	0.266421	0.266421	0.0577337	3.77289	3.92694	0.0469241	3.78387	3.90897	2019 CPTAC-CRC Label free
ALKBH3	1	1	1	NA	NA	NA	NA	NA	NA	2019 CPTAC-CRC TMT
APEX1	0.35513	0.637413	0.637413	-0.0458667	0.14879	0.102923	-0.0582	0.131	0.0728	2019 CPTAC-CRC TMT
APTX	0.850781	0.930542	0.930542	NA	NA	NA	NA	NA	NA	2019 CPTAC-CRC TMT
ASCC3	0.233824	0.584559	0.584559	-0.0454423	0.140926	0.0954837	-0.044	0.146	0.102	2019 CPTAC-CRC TMT
ATM	0.337376	0.634611	0.634611	0.0859373	-0.033014	0.0529233	0.09965	-0.05315	0.0465	2019 CPTAC-CRC TMT
ATRX	0.841208	0.930542	0.930542	0.000960791	0.151402	0.152363	0.0555	0.1265	0.182	2019 CPTAC-CRC TMT
BABAM1	0.660496	0.873901	0.873901	-0.0103071	-0.028272	-0.0385791	-0.00895	-0.03135	-0.0403	2019 CPTAC-CRC TMT
BCAS2	0.284126	0.621525	0.621525	-0.0492344	0.14376	0.0945256	-0.0475	0.1345	0.087	2019 CPTAC-CRC TMT
BRCC3	0.123284	0.423596	0.423596	0.0827159	-0.119588	-0.0368721	0.02945	-0.10025	-0.0708	2019 CPTAC-CRC TMT
BRE	0.0447163	0.215872	0.215872	-0.0789402	-0.007204	-0.0861442	-0.0918	0.0283	-0.0635	2019 CPTAC-CRC TMT
CCNH	0.797022	0.930542	0.930542	NA	NA	NA	NA	NA	NA	2019 CPTAC-CRC TMT
CDC5L	0.0337591	0.190878	0.190878	-0.0880693	0.23436	0.146291	-0.1185	0.2235	0.105	2019 CPTAC-CRC TMT
CDK7	0.685899	0.873901	0.873901	NA	NA	NA	NA	NA	NA	2019 CPTAC-CRC TMT
CETN2	0.512479	0.824679	0.824679	-0.0122989	-0.024622	-0.0369209	-0.0614	0.0248	-0.0366	2019 CPTAC-CRC TMT
CHEK2	0.828953	0.930542	0.930542	NA	NA	NA	NA	NA	NA	2019 CPTAC-CRC TMT
CUL3	0.260577	0.5944	0.5944	0.0291521	-0.007294	0.0218581	0.02325	-0.01125	0.012	2019 CPTAC-CRC TMT
CUL4A	0.310915	0.634611	0.634611	-0.032108	0.173494	0.141386	-0.0889	0.171	0.0821	2019 CPTAC-CRC TMT
CUL5	0.00573615	0.0861832	0.0861832	0.102809	-0.123132	-0.0203233	0.1284	-0.135	-0.0066	2019 CPTAC-CRC TMT
DDB1	0.190208	0.530796	0.530796	-0.0524706	0.114852	0.0623814	-0.094	0.122	0.028	2019 CPTAC-CRC TMT
DDB2	0.64383	0.873901	0.873901	-0.0375018	0.069332	0.0318302	-0.04745	0.01945	-0.028	2019 CPTAC-CRC TMT
DUT	0.429623	0.724665	0.724665	0.0623634	-0.061282	0.0010814	0.0387	-0.0787	-0.04	2019 CPTAC-CRC TMT
ERCC2	0.106345	0.415608	0.415608	NA	NA	NA	NA	NA	NA	2019 CPTAC-CRC TMT
ERCC3	0.242481	0.5944	0.5944	NA	NA	NA	NA	NA	NA	2019 CPTAC-CRC TMT
ERCC5	0.18876	0.530796	0.530796	NA	NA	NA	NA	NA	NA	2019 CPTAC-CRC TMT
FAM175A	0.620582	0.873901	0.873901	NA	NA	NA	NA	NA	NA	2019 CPTAC-CRC TMT
FANCI	0.316795	0.634611	0.634611	NA	NA	NA	NA	NA	NA	2019 CPTAC-CRC TMT
FEN1	0.0300709	0.18304	0.18304	-0.152465	0.335672	0.183207	-0.2195	0.3955	0.176	2019 CPTAC-CRC TMT
GTF2H1	0.302638	0.634611	0.634611	NA	NA	NA	NA	NA	NA	2019 CPTAC-CRC TMT
GTF2H3	0.327672	0.634611	0.634611	NA	NA	NA	NA	NA	NA	2019 CPTAC-CRC TMT
GTF2H4	0.60378	0.873901	0.873901	NA	NA	NA	NA	NA	NA	2019 CPTAC-CRC TMT
GTF2H5	0.181019	0.527972	0.527972	NA	NA	NA	NA	NA	NA	2019 CPTAC-CRC TMT
H2AFX	0.911036	0.950677	0.950677	0.0135962	-0.071066	-0.0574698	-0.11415	0.04765	-0.0665	2019 CPTAC-CRC TMT
HLTF	0.669605	0.873901	0.873901	NA	NA	NA	NA	NA	NA	2019 CPTAC-CRC TMT
HMGB1	0.132942	0.432834	0.432834	-0.0875171	0.193838	0.106321	-0.154	0.2	0.046	2019 CPTAC-CRC TMT
HMGB2	0.632826	0.873901	0.873901	-0.0379918	0.182936	0.144944	-0.0355	0.2025	0.167	2019 CPTAC-CRC TMT
HUS1	0.108102	0.415608	0.415608	NA	NA	NA	NA	NA	NA	2019 CPTAC-CRC TMT
IDH1	0.396645	0.691005	0.691005	-0.0750183	-0.058798	-0.133816	-0.14495	-0.06105	-0.206	2019 CPTAC-CRC TMT
KAT5	0.722506	0.886672	0.886672	NA	NA	NA	NA	NA	NA	2019 CPTAC-CRC TMT
LIG1	0.0221029	0.147353	0.147353	-0.172341	0.230688	0.0583465	-0.2537	0.297	0.0433	2019 CPTAC-CRC TMT
LIG3	0.00615594	0.0861832	0.0861832	-0.138176	0.197036	0.0588605	-0.1611	0.1915	0.0304	2019 CPTAC-CRC TMT
MDC1	0.0689807	0.292645	0.292645	-0.0807232	0.123072	0.0423488	-0.1417	0.123	-0.0187	2019 CPTAC-CRC TMT
MGMT	0.941644	0.96934	0.96934	-0.0148296	-0.049096	-0.0639256	0.025	0.0444	0.0694	2019 CPTAC-CRC TMT
MLH1	0.686145	0.873901	0.873901	NA	NA	NA	NA	NA	NA	2019 CPTAC-CRC TMT
MMS19	0.904927	0.950677	0.950677	0.0155074	0.102074	0.117581	0.01245	0.09155	0.104	2019 CPTAC-CRC TMT
MNAT1	0.263234	0.5944	0.5944	NA	NA	NA	NA	NA	NA	2019 CPTAC-CRC TMT
MORF4L1	0.705363	0.873901	0.873901	NA	NA	NA	NA	NA	NA	2019 CPTAC-CRC TMT
MPG	0.960053	0.981076	0.981076	0.0134017	0.045482	0.0588837	0.01905	0.05685	0.0759	2019 CPTAC-CRC TMT
MPLKIP	0.572604	0.852814	0.852814	NA	NA	NA	NA	NA	NA	2019 CPTAC-CRC TMT
MRPL40	0.0289212	0.18304	0.18304	-0.0938043	0.106688	0.0128837	-0.1745	0.135	-0.0395	2019 CPTAC-CRC TMT
MSH2	0.00367169	0.0642545	0.0642545	-0.190244	0.244504	0.0542605	-0.0955	0.2135	0.118	2019 CPTAC-CRC TMT
MSH3	0.194148	0.530796	0.530796	-0.121025	0.081176	-0.0398488	-0.0624	0.1275	0.0651	2019 CPTAC-CRC TMT
MSH6	0.000365439	0.0203177	0.0203177	-0.256956	0.311172	0.0542163	-0.2299	0.2875	0.0576	2019 CPTAC-CRC TMT
NABP2	0.00816102	0.103868	0.103868	NA	NA	NA	NA	NA	NA	2019 CPTAC-CRC TMT
NBN	0.510002	0.824679	0.824679	-0.0212299	0.121502	0.100272	-0.0275	0.1355	0.108	2019 CPTAC-CRC TMT
NEIL2	0.876263	0.94106	0.94106	NA	NA	NA	NA	NA	NA	2019 CPTAC-CRC TMT
NFATC2IP	0.829176	0.930542	0.930542	-0.0139937	0.06481	0.0508163	0.04085	0.01445	0.0553	2019 CPTAC-CRC TMT
NHEJ1	0.697174	0.873901	0.873901	-0.0452077	-0.002876	-0.0480837	-0.0221	-0.042	-0.0641	2019 CPTAC-CRC TMT
NSMCE1	0.262738	0.5944	0.5944	NA	NA	NA	NA	NA	NA	2019 CPTAC-CRC TMT
NSMCE2	0.146186	0.454801	0.454801	NA	NA	NA	NA	NA	NA	2019 CPTAC-CRC TMT
NSMCE3	0.0871451	0.358833	0.358833	0.138739	-0.061232	0.077507	0.08525	0.00825	0.0935	2019 CPTAC-CRC TMT
NTHL1	0.571132	0.852814	0.852814	NA	NA	NA	NA	NA	NA	2019 CPTAC-CRC TMT
NUDT1	0.650241	0.873901	0.873901	NA	NA	NA	NA	NA	NA	2019 CPTAC-CRC TMT
NUDT15	0.350138	0.637413	0.637413	NA	NA	NA	NA	NA	NA	2019 CPTAC-CRC TMT
NUDT18	0.536797	0.844399	0.844399	NA	NA	NA	NA	NA	NA	2019 CPTAC-CRC TMT
PARG	0.399796	0.691005	0.691005	NA	NA	NA	NA	NA	NA	2019 CPTAC-CRC TMT
PARP1	0.320207	0.634611	0.634611	-0.0802198	0.177364	0.0971442	-0.014	0.15	0.136	2019 CPTAC-CRC TMT
PARP2	0.835664	0.930542	0.930542	NA	NA	NA	NA	NA	NA	2019 CPTAC-CRC TMT
PARP4	0.621897	0.873901	0.873901	0.0464221	0.03565	0.0820721	0.07385	0.01295	0.0868	2019 CPTAC-CRC TMT
PCNA	0.00940906	0.109772	0.109772	-0.293301	0.372454	0.0791535	-0.357	0.401	0.044	2019 CPTAC-CRC TMT
PLRG1	0.0125367	0.114597	0.114597	-0.112708	0.228336	0.115628	-0.1125	0.2135	0.101	2019 CPTAC-CRC TMT
PNKP	0.197153	0.530796	0.530796	NA	NA	NA	NA	NA	NA	2019 CPTAC-CRC TMT
POLA1	0.138298	0.44004	0.44004	NA	NA	NA	NA	NA	NA	2019 CPTAC-CRC TMT
POLB	0.109839	0.415608	0.415608	-0.110496	0.142656	0.0321605	-0.0493	0.0421	-0.0072	2019 CPTAC-CRC TMT
POLD1	0.0142681	0.114597	0.114597	-0.132797	0.22705	0.0942535	-0.1842	0.251	0.0668	2019 CPTAC-CRC TMT
POLD2	0.125172	0.423596	0.423596	-0.0920205	0.153774	0.0617535	-0.0649	0.114	0.0491	2019 CPTAC-CRC TMT
POLD3	0.701992	0.873901	0.873901	NA	NA	NA	NA	NA	NA	2019 CPTAC-CRC TMT
POLD4	0.258772	0.5944	0.5944	NA	NA	NA	NA	NA	NA	2019 CPTAC-CRC TMT
POLE3	0.224882	0.572427	0.572427	-0.0884367	0.116232	0.0277953	-0.0917	0.109	0.0173	2019 CPTAC-CRC TMT
POLE4	0.33997	0.634611	0.634611	NA	NA	NA	NA	NA	NA	2019 CPTAC-CRC TMT
PPP4C	0.310915	0.634611	0.634611	0.134178	-0.008376	0.125802	0.01885	0.05865	0.0775	2019 CPTAC-CRC TMT
PPP4R1	0.0521568	0.243398	0.243398	0.145856	-0.087582	0.0582744	0.0756	-0.0648	0.0108	2019 CPTAC-CRC TMT
PPP4R2	0.814191	0.930542	0.930542	-0.0375204	0.139832	0.102312	0.0282	0.0758	0.104	2019 CPTAC-CRC TMT
PPP4R4	0.126418	0.423596	0.423596	NA	NA	NA	NA	NA	NA	2019 CPTAC-CRC TMT
PRKDC	0.00043538	0.0203177	0.0203177	-0.196645	0.335598	0.138953	-0.2165	0.3485	0.132	2019 CPTAC-CRC TMT
PRPF19	0.127079	0.423596	0.423596	-0.0898845	0.280638	0.190753	-0.056	0.267	0.211	2019 CPTAC-CRC TMT
PTEN	0.0661667	0.292645	0.292645	NA	NA	NA	NA	NA	NA	2019 CPTAC-CRC TMT
RAD23A	0.0340853	0.190878	0.190878	0.112505	-0.134784	-0.0222791	0.188	-0.19	-0.002	2019 CPTAC-CRC TMT
RAD23B	0.322086	0.634611	0.634611	0.0580826	-0.03175	0.0263326	0.0518	-0.0482	0.0036	2019 CPTAC-CRC TMT
RAD50	0.632827	0.873901	0.873901	-0.0165654	0.154198	0.137633	-0.032	0.174	0.142	2019 CPTAC-CRC TMT
RAD9A	0.518679	0.825171	0.825171	NA	NA	NA	NA	NA	NA	2019 CPTAC-CRC TMT
RBX1	0.847239	0.930542	0.930542	-0.00477898	0.115072	0.110293	-0.051	0.1485	0.0975	2019 CPTAC-CRC TMT
RECQL	0.0218789	0.147353	0.147353	0.141805	0.12669	0.268495	0.1165	0.1385	0.255	2019 CPTAC-CRC TMT
RECQL5	0.00314158	0.0628315	0.0628315	NA	NA	NA	NA	NA	NA	2019 CPTAC-CRC TMT
RFC1	0.0385493	0.199885	0.199885	-0.127503	0.16598	0.0384767	-0.1026	0.1295	0.0269	2019 CPTAC-CRC TMT
RFC2	0.0112394	0.113642	0.113642	-0.112234	0.207532	0.0952977	-0.1336	0.15	0.0164	2019 CPTAC-CRC TMT
RFC3	0.0195528	0.144074	0.144074	-0.119566	0.168378	0.0488116	-0.1136	0.147	0.0334	2019 CPTAC-CRC TMT
RFC4	0.000678207	0.0237372	0.0237372	-0.156465	0.267216	0.110751	-0.2027	0.26	0.0573	2019 CPTAC-CRC TMT
RFC5	0.16543	0.492772	0.492772	-0.0313279	0.178986	0.147658	-0.0982	0.168	0.0698	2019 CPTAC-CRC TMT
RIF1	0.155769	0.47408	0.47408	NA	0.190886	NA	NA	0.148	NA	2019 CPTAC-CRC TMT
RNF169	0.734671	0.886672	0.886672	NA	NA	NA	NA	NA	NA	2019 CPTAC-CRC TMT
RNMT	0.500151	0.823779	0.823779	0.0465991	0.179966	0.226565	0.033	0.199	0.232	2019 CPTAC-CRC TMT
RPA1	0.793327	0.930542	0.930542	0.00595772	0.072526	0.0784837	-0.05505	0.10375	0.0487	2019 CPTAC-CRC TMT
RPA2	0.734571	0.886672	0.886672	-0.00344674	0.18347	0.180023	-0.014	0.18	0.166	2019 CPTAC-CRC TMT
RPA3	0.987704	0.99481	0.99481	-0.0472281	0.089256	0.0420279	0.07965	0.05235	0.132	2019 CPTAC-CRC TMT
RRM1	0.0683976	0.292645	0.292645	-0.190668	0.22017	0.0295023	-0.2352	0.174	-0.0612	2019 CPTAC-CRC TMT
RRM2	0.0147335	0.114597	0.114597	-0.250585	0.302152	0.0515674	-0.269	0.2935	0.0245	2019 CPTAC-CRC TMT
RRM2B	0.907981	0.950677	0.950677	-0.0169399	-0.004702	-0.0216419	0.02685	-0.03005	-0.0032	2019 CPTAC-CRC TMT
SETMAR	0.604196	0.873901	0.873901	NA	NA	NA	NA	NA	NA	2019 CPTAC-CRC TMT
SMARCA4	0.333509	0.634611	0.634611	-0.0389442	0.151814	0.11287	-0.0529	0.1505	0.0976	2019 CPTAC-CRC TMT
SMARCAD1	0.000984333	0.0275613	0.0275613	NA	NA	NA	NA	NA	NA	2019 CPTAC-CRC TMT
SMARCC1	0.307252	0.634611	0.634611	-0.0440757	0.128378	0.0843023	-0.0842	0.167	0.0828	2019 CPTAC-CRC TMT
SMC5	0.551956	0.852814	0.852814	NA	NA	NA	NA	NA	NA	2019 CPTAC-CRC TMT
SMC6	0.811233	0.930542	0.930542	NA	NA	NA	NA	NA	NA	2019 CPTAC-CRC TMT
TCEA1	0.0113642	0.113642	0.113642	-0.15937	0.173782	0.0144116	-0.149	0.165	0.016	2019 CPTAC-CRC TMT
TDP1	0.558532	0.852814	0.852814	NA	NA	NA	NA	NA	NA	2019 CPTAC-CRC TMT
TDP2	0.823174	0.930542	0.930542	0.0203271	-0.304262	-0.283935	0.0335	-0.3165	-0.283	2019 CPTAC-CRC TMT
TELO2	0.916724	0.950677	0.950677	NA	NA	NA	NA	NA	NA	2019 CPTAC-CRC TMT
TOP3B	0.395655	0.691005	0.691005	NA	NA	NA	NA	NA	NA	2019 CPTAC-CRC TMT
TP53	0.268913	0.597584	0.597584	NA	NA	NA	NA	NA	NA	2019 CPTAC-CRC TMT
TP53BP1	0.865382	0.939174	0.939174	0.0135736	0.061852	0.0754256	0.0289	0.0129	0.0418	2019 CPTAC-CRC TMT
TREX1	0.250723	0.5944	0.5944	NA	NA	NA	NA	NA	NA	2019 CPTAC-CRC TMT
TYMS	0.569697	0.852814	0.852814	NA	NA	NA	NA	NA	NA	2019 CPTAC-CRC TMT
UBE2A	0.353233	0.637413	0.637413	NA	NA	NA	NA	NA	NA	2019 CPTAC-CRC TMT
UBE2B	0.409952	0.699918	0.699918	NA	NA	NA	NA	NA	NA	2019 CPTAC-CRC TMT
UBE2N	0.668894	0.873901	0.873901	0.0105665	-0.006506	0.00406047	0.0385	-0.0056	0.0329	2019 CPTAC-CRC TMT
UBE2T	0.850631	0.930542	0.930542	NA	NA	NA	NA	NA	NA	2019 CPTAC-CRC TMT
UBE2V2	0.214747	0.567256	0.567256	0.0810272	-0.28369	-0.202663	0.0555	-0.2765	-0.221	2019 CPTAC-CRC TMT
UIMC1	0.222951	0.572427	0.572427	NA	NA	NA	NA	NA	NA	2019 CPTAC-CRC TMT
UNG	0.0355676	0.191518	0.191518	NA	0.201172	NA	NA	0.226	NA	2019 CPTAC-CRC TMT
WDR48	0.978484	0.992665	0.992665	0.00679079	-0.026428	-0.0196372	-0.0051	-0.0263	-0.0314	2019 CPTAC-CRC TMT
WEE1	0.694418	0.873901	0.873901	NA	NA	NA	NA	NA	NA	2019 CPTAC-CRC TMT
XAB2	0.0403935	0.201968	0.201968	-0.104767	0.16646	0.061693	-0.0917	0.147	0.0553	2019 CPTAC-CRC TMT
XPC	0.666092	0.873901	0.873901	0.0363446	-0.015612	0.0207326	0.01285	5e-05	0.0129	2019 CPTAC-CRC TMT
XRCC1	0.0147339	0.114597	0.114597	-0.272074	0.36839	0.0963163	-0.2509	0.294	0.0431	2019 CPTAC-CRC TMT
XRCC4	0.880563	0.94106	0.94106	NA	NA	0.141635	NA	NA	0.129	2019 CPTAC-CRC TMT
XRCC5	0.00221913	0.0517797	0.0517797	-0.158492	0.263192	0.1047	-0.181	0.2645	0.0835	2019 CPTAC-CRC TMT
XRCC6	5.7621e-05	0.00806693	0.00806693	-0.183979	0.287614	0.103635	-0.2047	0.2865	0.0818	2019 CPTAC-CRC TMT
YWHAB	0.126117	0.423596	0.423596	-0.123681	0.134146	0.0104651	-0.0825	0.137	0.0545	2019 CPTAC-CRC TMT
YWHAE	0.685809	0.873901	0.873901	0.0503176	-0.076606	-0.0262884	-0.00785	-0.08335	-0.0912	2019 CPTAC-CRC TMT
YWHAG	0.471221	0.785368	0.785368	0.0230218	0.023148	0.0461698	0.0426	0.012	0.0546	2019 CPTAC-CRC TMT

## Sheet: Table S2f
	sum	SUM	POLR2A_S1847__P24928:S1847	POLR2A_S1850__P24928:S1850	POLR2A_S1857__P24928:S1857	POLR2A_S1861__P24928:S1861	POLR2A_S1864__P24928:S1864	POLR2A_S1875__P24928:S1875	POLR2A_S1878__P24928:S1878	POLR2A_S1882__P24928:S1882	POLR2A_S1899__P24928:S1899	POLR2A_S1906__P24928:S1906	POLR2A_S1924__P24928:S1924	POLR2A_S1927__P24928:S1927	POLR2A_S1931__P24928:S1931
01CO005	-0.7705	-24.1065	-2.917	0.308	-0.128	-2.917	-2.917	-2.917	-2.917	-2.917	-2.917	-0.243	0.001	-2.917	-0.7085
01CO006	-3.866	-24.285	-2.917	-0.461	-0.323	-2.917	-2.917	-0.9385	-2.917	-1.266	-2.917	-2.917	-2.917	-0.656	-0.2215
01CO008	1.8105	-15.6915	-2.917	-0.266	-2.917	-2.917	-2.917	0.188	0.1415	0.214	-2.917	0.493	-2.917	0.52	0.52
01CO013	-2.506	-31.676	-2.917	-2.917	-2.917	-2.917	-2.917	-1.024	-2.917	-2.917	-2.917	-2.917	-2.917	-1.1	-0.382
01CO014	-1.002	-21.421	-0.092	-2.917	-2.917	-0.187	-2.917	-2.917	-2.917	-0.373	-0.382	-2.917	-2.917	-0.032	0.064
01CO015	1.488	-16.014	-2.917	0.093	0.16	-2.917	0.551	-2.917	0.404	-2.917	-0.107	-2.917	-2.917	0.201	0.186
01CO019	-0.5805	-18.0825	-2.917	-0.076	-2.917	-2.917	-2.917	-0.4	-0.216	-0.3175	-2.917	0.21	-2.917	-0.003	0.222
01CO022	-0.14	-23.476	0.174	-0.24	-2.917	-2.917	-2.917	-2.917	-2.917	-2.917	0.07	-2.917	-2.917	0.045	-0.189
05CO002	-0.105	-17.607	-2.917	0.529	-2.917	-2.917	-2.917	-0.688	0.017	-0.43	-2.917	0.64	-2.917	-0.079	-0.094
05CO003	-4.779	-22.281	-2.917	-0.2465	-0.3815	-2.917	-0.579	-2.917	-0.208	-2.917	-0.772	-2.917	-2.917	-1.917	-0.675
05CO006	0.247	-17.255	-2.917	0.051	0.081	-2.917	0.114	-2.917	0.156	-2.917	-0.063	-2.917	-2.917	-0.343	0.251
05CO011	2.088	-15.414	-2.917	0.361	0.274	-2.917	-2.917	-2.917	-0.156	-0.156	0.285	-2.917	-2.917	0.694	0.786
05CO015	-0.901	-24.237	-0.115	-0.238	-2.917	-2.917	-2.917	-2.917	-2.917	-2.917	-0.155	-2.917	-2.917	-0.224	-0.169
05CO020	1.573	-18.846	-0.009	-2.917	-2.917	0.864	-2.917	-2.917	-2.917	-0.307	0.169	-2.917	-2.917	0.445	0.411
05CO026	0.059	-32.028	-2.917	0.202	-2.917	-2.917	-2.917	-2.917	-2.917	-2.917	-2.917	-2.917	-2.917	-2.917	-0.143
05CO028	-1.039	-24.375	-2.917	0.297	-0.132	-2.917	-2.917	-2.917	-2.917	-2.917	-2.917	0.3875	-1.098	-2.917	-0.4935
05CO029	1.383	-16.119	-2.917	-2.917	0.197	-2.917	-2.917	0.114	-2.917	-0.026	0.309	0.603	-2.917	0.093	0.093
05CO032	-1.0875	-21.5065	0.193	-2.917	-2.917	-0.615	-2.917	-2.917	-2.917	-0.417	-0.156	-2.917	-2.917	-0.168	0.0755
05CO033	-2.3665	-22.7855	-2.917	-0.226	-2.917	-2.917	-2.917	-2.917	-0.069	-2.917	-2.917	-0.468	-0.937	-0.3765	-0.29
05CO034	-0.009	-29.179	-2.917	0.03	-2.917	-2.917	-2.917	-2.917	-2.917	-2.917	-2.917	-2.917	-2.917	-0.099	0.06
05CO035	0.2145	-20.2045	-2.917	0.078	0.15	-2.917	-2.917	0.186	-2.917	0.186	-2.917	-2.917	-2.917	-0.36	-0.0255
05CO037	-1.0175	-21.4365	0.188	-2.917	-2.917	-0.331	-2.917	-2.917	-2.917	-0.393	-0.375	-2.917	-2.917	-0.206	0.0995
05CO039	-0.205	-29.375	-2.917	0.597	-2.917	-2.917	-2.917	-2.917	-2.917	-2.917	-2.917	-2.917	-2.917	-0.476	-0.326
05CO041	0.3735	-28.7965	-2.917	0.421	-2.917	-2.917	-2.917	-2.917	-2.917	-2.917	-2.917	-2.917	-2.917	-0.183	0.1355
05CO044	-3.6815	-24.1005	-2.917	-0.502	-0.613	-2.917	-2.917	-0.792	-2.917	-0.792	-2.917	-2.917	-2.917	-0.486	-0.4965
05CO045	-2.8975	-23.3165	-2.917	-0.3355	-0.226	-2.917	-2.917	-0.768	-2.917	-0.768	-2.917	-2.917	-2.917	-0.533	-0.267
05CO047	-1.3055	-24.6415	-0.164	-0.048	-2.917	-2.917	-2.917	-2.917	-2.917	-2.917	-0.476	-2.917	-2.917	-0.2625	-0.355
05CO048	-0.917	-30.087	-2.917	-0.315	-0.352	-2.917	-2.917	-2.917	-2.917	-2.917	-2.917	-2.917	-2.917	-2.917	-0.25
05CO049	-0.739	-21.158	-0.314	-2.917	-2.917	0.721	-2.917	-2.917	-2.917	-0.641	-0.297	-2.917	-2.917	-0.092	-0.116
05CO050	-0.7865	-29.9565	-2.917	-2.917	-2.917	-2.917	-2.917	-0.366	-2.917	-2.917	-2.917	-2.917	-2.917	0.054	-0.4745
05CO053	-3.28	-23.699	-2.917	-0.1325	-0.502	-2.917	-2.917	-1.002	-2.917	-1.002	-2.917	-2.917	-2.917	-0.416	-0.2255
05CO054	0.912	-16.59	-2.917	-2.917	0.326	-2.917	-2.917	0.007	-2.917	-0.013	0.246	0.338	-2.917	0.004	0.004
06CO001	-0.3785	-29.5485	-2.917	-2.917	-2.917	-2.917	-2.917	0.198	-2.917	-2.917	-2.917	-2.917	-2.917	-0.635	0.0585
06CO002	0.1705	-20.2485	-2.917	0.129	-2.917	-2.917	-2.917	-2.917	0.687	-2.917	-2.917	0.474	-0.481	-0.3915	-0.247
09CO005	-0.7105	-18.2125	-2.917	0.24	-2.917	-2.917	-2.917	-0.824	-0.312	-0.6515	-2.917	0.367	-2.917	0.157	0.313
09CO006	-0.6955	-18.1975	-2.917	-0.106	-0.3195	-2.917	-0.005	-2.917	0.138	-2.917	-0.321	-2.917	-2.917	-0.041	-0.041
09CO008	0.346	-28.824	-2.917	-0.151	0.224	-2.917	-2.917	-2.917	-2.917	-2.917	-2.917	-2.917	-2.917	-2.917	0.273
09CO011	-0.7355	-15.3205	-2.917	-0.051	-0.187	-2.917	0.052	0.144	-2.917	-0.191	-2.917	-0.379	-0.082	-2.917	-0.0415
09CO013	-4.486	-24.905	-2.917	-0.534	-0.964	-2.917	-2.917	-0.74	-2.917	-0.773	-2.917	-2.917	-2.917	-0.788	-0.687
09CO014	-0.1275	-17.6295	-2.917	0.183	-0.58	-2.917	-2.917	-2.917	0.133	-0.2705	-0.454	-2.917	-2.917	0.677	0.184
09CO015	0.0515	-23.2845	-2.917	0.08	-0.027	-2.917	-2.917	-2.917	-2.917	-2.917	-2.917	-0.1785	0.083	-2.917	0.094
09CO018	3.146	-11.439	-2.917	0.006	0.583	-2.917	0.804	0.46	-2.917	0.09	-2.917	0.274	0.538	-2.917	0.391
09CO019	1.1285	-19.2905	-2.917	-2.917	0.06	-2.917	-2.917	-2.917	0.135	0.135	-2.917	-0.062	-2.917	0.573	0.2875
09CO022	-0.279	-32.366	-2.917	-2.917	-2.917	-2.917	-2.917	-2.917	-2.917	-2.917	-2.917	-0.31	-2.917	0.031	-2.917
11CO005	1.58	-30.507	-2.917	-2.917	-2.917	-2.917	-2.917	-2.917	-2.917	-2.917	-2.917	0.365	-2.917	1.215	-2.917
11CO007	2.014	-15.488	-2.917	0.331	0.166	-2.917	-2.917	-2.917	0.055	-2.917	-0.048	-0.474	-2.917	1.272	0.712
11CO008	1.8	-15.702	-2.917	0.039	-2.917	-2.917	-2.917	-2.917	0.761	0.761	-0.359	-0.359	-2.917	0.859	0.098
11CO010	2.1	-29.987	-2.917	-2.917	-2.917	-2.917	-2.917	-2.917	-2.917	-2.917	-2.917	0.611	-2.917	1.489	-2.917
11CO018	-2.1505	-22.5695	-2.917	-2.917	-0.091	-2.917	-2.917	-2.917	-0.522	-0.522	-2.917	-0.353	-2.917	-0.352	-0.3105
11CO019	-1.657	-19.159	-2.917	-0.053	-2.917	-2.917	-2.917	-2.917	-0.142	-0.142	-0.361	-0.361	-2.917	-0.291	-0.307
11CO020	0.026	-29.144	-2.917	0.488	-2.917	-2.917	-2.917	-2.917	-2.917	-2.917	-2.917	-2.917	-2.917	-0.295	-0.167
11CO021	-2.9565	-17.5415	-2.917	-0.214	-0.557	-2.917	-0.076	-0.136	-2.917	-0.619	-2.917	-0.508	-0.559	-2.917	-0.2875
11CO022	1.013	-16.489	-2.917	-2.917	0.081	-2.917	-2.917	0.16	-2.917	0.074	0.216	0.093	-2.917	0.402	-0.013
11CO027	0.061	-17.441	-2.917	-0.142	-0.144	-2.917	-2.917	-2.917	-0.332	-2.917	-0.26	-0.655	-2.917	1.274	0.32
11CO030	-0.731	-32.818	-2.917	-0.626	-2.917	-2.917	-2.917	-2.917	-2.917	-2.917	-2.917	-2.917	-2.917	-2.917	-0.105
11CO031	1.839	-24.414	0.084	-2.917	-2.917	-2.917	-2.917	-2.917	-0.183	-2.917	-2.917	-2.917	-2.917	1.153	0.785
11CO032	1.316	-19.103	-2.917	-2.917	0.137	-2.917	-2.917	-2.917	0.28	0.28	-2.917	0.003	-2.917	0.452	0.164
11CO033	0.731	-28.439	-2.917	0.516	-2.917	-2.917	-2.917	-2.917	-2.917	-2.917	-2.917	-2.917	-2.917	0.084	0.131
11CO036	0.1685	-17.3335	-2.917	-0.721	-2.917	-2.917	-2.917	-0.216	0.0135	-0.004	-2.917	0.083	-2.917	0.408	0.605
11CO037	-0.0175	-14.6025	-2.917	-0.304	-0.251	-2.917	-0.566	0.517	-2.917	0.047	-2.917	-0.194	1.011	-2.917	-0.2775
11CO039	0.63	-31.457	-2.917	-2.917	-2.917	-2.917	-2.917	-2.917	-2.917	-2.917	-2.917	-0.312	-2.917	0.942	-2.917
11CO042	-0.1285	-23.4645	0.108	0.13	-2.917	-2.917	-2.917	-2.917	-2.917	-2.917	-0.111	-2.917	-2.917	0.0255	-0.281
11CO043	-0.0735	-20.4925	-2.917	-2.917	-0.237	-2.917	-2.917	-2.917	0.05	0.05	-2.917	-0.021	-2.917	0.022	0.0625
11CO044	-0.8635	-27.1165	-0.244	-2.917	-2.917	-2.917	-2.917	-2.917	-0.175	-2.917	-2.917	-2.917	-2.917	-0.246	-0.1985
11CO045	-0.445	-32.532	-2.917	-0.259	-2.917	-2.917	-2.917	-2.917	-2.917	-2.917	-2.917	-2.917	-2.917	-2.917	-0.186
11CO047	-0.373	-26.626	-2.917	-0.169	-2.917	-2.917	-2.917	0.016	-2.917	0.016	-2.917	-2.917	-2.917	-2.917	-0.236
11CO048	-0.288	-29.458	-2.917	0.027	0.183	-2.917	-2.917	-2.917	-2.917	-2.917	-2.917	-2.917	-2.917	-2.917	-0.498
11CO051	-1.355	-18.857	-2.917	-0.164	-0.332	-2.917	-2.917	-2.917	0.059	-0.067	-0.191	-2.917	-2.917	-0.33	-0.33
11CO052	-1.657	-22.076	-0.315	-2.917	-2.917	-0.208	-2.917	-2.917	-2.917	-0.434	-0.161	-2.917	-2.917	-0.296	-0.243
11CO053	1.683	-15.819	-2.917	0.605	-2.917	-2.917	-2.917	-2.917	0.383	0.383	0.385	0.385	-2.917	-0.569	0.111
11CO054	1.381	-13.204	-2.917	-0.186	0.133	-2.917	0.351	0.277	-2.917	0.335	-2.917	-0.037	0.361	-2.917	0.147
11CO057	-0.0305	-20.4495	-2.917	0.07	0.039	-2.917	-2.917	-0.22	-2.917	-0.054	-2.917	-2.917	-2.917	0.005	0.1295
11CO058	-0.782	-18.284	-2.917	-0.204	-0.018	-2.917	-2.917	-2.917	0.022	-2.917	-0.141	-0.077	-2.917	-0.227	-0.137
11CO061	2.7305	-14.7715	-2.917	0.299	0.5375	-2.917	0.062	-2.917	0.401	-2.917	0.146	-2.917	-2.917	0.832	0.453
11CO062	0.625	-25.628	-2.917	-0.105	-2.917	-2.917	-2.917	0.361	-2.917	0.361	-2.917	-2.917	-2.917	-2.917	0.008
11CO070	0.084	-20.335	-2.917	-0.314	-2.917	-2.917	-2.917	-2.917	0.108	-2.917	-2.917	0.006	0.026	0.162	0.096
11CO072	-0.382	-26.635	-2.917	0.004	-2.917	-2.917	-2.917	-0.313	-2.917	-0.313	-2.917	-2.917	-2.917	-2.917	0.24
11CO077	-1.0195	-21.4385	-2.917	-2.917	0.444	-2.917	-2.917	-2.917	-0.193	-0.193	-2.917	0.044	-2.917	-0.8	-0.3215
11CO079	0.3635	-22.9725	-2.917	0.284	-0.088	-2.917	-2.917	-2.917	-2.917	-2.917	-2.917	-0.098	0.204	-2.917	0.0615
14CO003	-0.352	-32.439	-2.917	-0.165	-2.917	-2.917	-2.917	-2.917	-2.917	-2.917	-2.917	-2.917	-2.917	-2.917	-0.187
14CO005	-2.7715	-23.1905	-2.917	-0.102	-0.794	-2.917	-2.917	-0.3385	-2.917	-0.575	-2.917	-2.917	-2.917	-0.59	-0.372
15CO001	4.0595	-16.3595	-2.917	0.662	-2.917	-2.917	-2.917	-2.917	1.197	-2.917	-2.917	1.225	0.091	0.1885	0.696
15CO002	1.031	-16.471	-2.917	-2.917	-0.09	-2.917	-2.917	-0.004	-2.917	0.045	0.153	-0.005	-2.917	0.801	0.131
16CO002	2.13	-15.372	-2.917	0.25	0.491	-2.917	-2.917	-2.917	0.171	-2.917	-0.037	0.08	-2.917	0.64	0.535
16CO003	0.1115	-20.3075	-2.917	-0.19	-2.917	-2.917	-2.917	-2.917	0.138	-2.917	-2.917	-0.279	-0.171	0.2005	0.413
16CO006	0.9085	-16.5935	-2.917	-0.0085	0.048	-2.917	0.188	-2.917	0.307	-2.917	-0.34	-2.917	-2.917	0.357	0.357
16CO011	-1.028	-18.53	-2.917	0.46	-0.158	-2.917	-2.917	-2.917	-0.498	-0.302	-0.174	-2.917	-2.917	-0.178	-0.178
20CO001	2.488	-17.931	-2.917	0.5735	0.536	-2.917	-2.917	-0.172	-2.917	-0.172	-2.917	-2.917	-2.917	0.988	0.7345
20CO003	-0.253	-17.755	-2.917	-2.917	-0.07	-2.917	-2.917	-0.144	-2.917	0.107	0.326	-0.148	-2.917	-0.092	-0.232
20CO004	-1.6085	-22.0275	0.081	-2.917	-2.917	-0.122	-2.917	-2.917	-2.917	-0.418	-0.609	-2.917	-2.917	-0.393	-0.1475
20CO006	1.496	-16.006	-2.917	-0.142	-2.917	-2.917	-2.917	-0.174	0.4345	0.3425	-2.917	0.413	-2.917	0.339	0.283
20CO007	-0.7125	-18.2145	-2.917	0.164	-2.917	-2.917	-2.917	-2.917	-0.232	-0.232	0.003	0.003	-2.917	-0.455	0.0365
21CO006	-0.071	-32.158	-2.917	-0.15	-2.917	-2.917	-2.917	-2.917	-2.917	-2.917	-2.917	-2.917	-2.917	-2.917	0.079
21CO007	0.2145	-28.9555	-2.917	0.499	-2.917	-2.917	-2.917	-2.917	-2.917	-2.917	-2.917	-2.917	-2.917	-0.027	-0.2575
22CO004	-1.2305	-21.6495	-2.917	-2.917	0.193	-2.917	-2.917	-2.917	-0.407	-0.407	-2.917	-0.056	-2.917	-0.409	-0.1445
22CO006	-1.402	-18.904	-2.917	-0.391	-2.917	-2.917	-2.917	-0.593	-0.067	-0.37	-2.917	-0.125	-2.917	-0.159	0.303
27CO004	-2.378	-31.548	-2.917	-2.917	-2.917	-2.917	-2.917	-0.528	-2.917	-2.917	-2.917	-2.917	-2.917	-1.353	-0.497

## Sheet: Table S2g
	SUM	P24928_1843_S	P24928_1845_S	P24928_1847_S	P24928_1849_S	P24928_1850_S	P24928_1857_S	P24928_1861_S	P24928_1864_S	P24928_1875_S	P24928_1878_S	P24928_1882_S	P24928_1889_S	P24928_1892_S	P24928_1896_S	P24928_1899_S	P24928_1906_S	P24928_1910_S	P24928_1913_S	P24928_1917_S	P24928_1920_S
CCRC.0001	33.82	0.656	0.12	0.376	0.103	0.503	3.706	1.461	-1.834	2.349	2.059	1.764	0.912	0.996	3.138	1.032	4.153	3.424	3.057	3.475	2.37
CCRC.0002	36.416	2.142	0.407	1.33	0.643	1.186	2.597	1.534	1.393	1.566	2.156	1.199	0.689	1.083	2.057	1.972	3.789	2.52	2.866	2.849	2.438
CCRC.0005	43.694	1.298	0.642	0.764	0.943	0.891	0.518	1.532	1.774	2.584	2.609	1.812	0.984	1.046	3.876	3.239	6.918	2.654	3.172	3.205	3.233
CCRC.0006	34.914	2.365	-0.098	0.919	0.285	0.419	1.187	1.385	0.778	2.217	2.218	1.358	1.14	-0.339	2.482	-0.752	7.629	2.892	3.308	3.106	2.415
CCRC.0007	21.095	2.119	-0.779	1.965	-0.516	-0.593	-0.286	0.956	0.35	1.029	1.17	0.42	-1.341	-2.997	2.058	-0.584	9.242	2.367	2.527	2.274	1.714
CCRC.0008	-49.049	-1.619	-1.258	-1.258	-1.039	-1.037	-1.146	0.113	0.914	-0.164	0.413	-1.431	-14.937	-5.741	-16.2	-14.937	9.101	0.562	1.118	0.179	-0.682
CCRC.0010	31.384	2.025	-1.21	1.821	-0.477	-0.281	0.647	0.254	3.184	1.833	2.883	0.692	-0.42	-0.669	2.475	-1.91	10.042	1.491	3.255	2.366	3.383
CCRC.0013	18.603	0.461	-1.881	-1.549	-1.024	0.607	1.084	1.82	-1.403	1.588	1.365	1.117	-0.009	-1.853	3.478	-1.92	5.314	3.251	2.765	3.205	2.187
CCRC.0014	26.66	0.718	0.032	0.489	1.026	0.508	2.548	0.895	0.572	-0.228	1.062	0.089	-1.004	-2.856	2.366	2.744	8.889	2.389	2.485	2.217	1.719
CCRC.0015	14.165	-0.744	-0.809	-0.622	-0.274	-0.372	0.966	0.753	1.54	-1.08	1.665	-1.919	-1.211	-1.332	2.502	-0.705	9.061	1.315	2.32	1.431	1.68
CCRC.0016	0.559	1.47	-2.907	-2.353	-1.588	-2.233	2.177	0.142	0.244	-0.222	0.441	-1.25	-2.403	-4.951	3.309	1.561	8.882	-0.157	0.499	-0.708	0.606
CCRC.0018	-81.329	-1.941	-3.399	-3.399	-1.884	-1.885	1.641	1.263	0.146	0.68	1.302	0.211	-16.2	-16.2	-16.2	-16.2	-16.2	2.106	2.029	1.946	0.855
CCRC.0019	-24.125	0.295	-0.395	0.322	0.043	0.072	2.276	0.636	0.524	-0.614	0.381	-2.907	-1.02	-16.2	1.869	-16.2	2.136	1.348	1.333	1.468	0.508
CCRC.0020	-34.032	-0.5	-1.161	-1.477	-0.379	-0.381	1.011	0.401	-1.149	0.029	0.367	-0.773	-16.2	-16.2	2.611	-16.2	10.615	1.881	1.501	1.37	0.602
CCRC.0021	16.084	0.596	-2.609	0.298	-1.836	-1.53	1.684	1.332	-0.074	0.808	0.805	0.31	-0.469	-2.479	2.934	-1.576	10.146	2.099	2.068	2.083	1.494
CCRC.0022	-244.173	-16.2	-16.2	-16.2	-16.2	-16.2	-16.2	-16.2	-16.2	-16.2	-1.229	-16.2	-16.2	-16.2	-16.2	-16.2	-6.921	-2.976	-0.962	-2.473	-2.812
CCRC.0023	36.515	1.03	-0.083	0.207	0.25	0.527	1.673	2.205	1.153	2.788	2.457	1.806	0.512	0.026	0.079	-0.919	9.167	3.688	3.459	3.682	2.808
CCRC.0024	46.481	0.958	-0.278	0.023	0.258	0.026	1.861	2.215	1.981	3.002	3.178	2.514	1.295	0.843	4.058	-0.31	9.963	4.047	3.72	4.014	3.113
CCRC.0025	10.716	0.13	-1.212	-0.752	-0.699	-0.952	0.947	0.542	0.077	0.116	0.758	-2.82	-2.035	0.716	2.867	0.856	9.886	0.461	1.424	1.078	-0.672
CCRC.0026	-22.165	-1.081	-1.151	0.167	-0.331	0.15	1.712	-16.2	1.157	-0.182	0.679	-4.046	-2.103	-2.639	-2.639	-2.639	6.395	-1.099	1.1	-0.073	0.658
CCRC.0028	45.238	1.981	0.969	1.211	1.137	1.177	0.282	1.686	2.485	2.076	3.002	1.623	0.572	1.211	2.914	2.673	7.424	2.809	3.268	3.252	3.486
CCRC.0030	-46.188	1.761	1.089	-2.501	-2.986	-0.034	0.217	0.279	-14.547	0.553	-0.44	-0.369	-16.2	1.884	-16.2	-4.079	2.038	1.468	0.769	1.027	0.083
CCRC.0033	32.427	0.938	-0.07	1.221	1.064	0.312	1.58	1.806	-0.7	2.316	1.78	1.844	1.857	1.126	3.413	1.498	1.11	3.221	2.748	3.271	2.092
CCRC.0034	16.686	1.248	0.386	0.304	0.622	0.55	1.097	0.914	2.308	1.406	2.193	-2.381	-0.553	-0.737	1.425	-1.426	11.015	-2.582	1.097	-0.313	0.113
CCRC.0035	26.043	1.119	-1.266	0.933	-1.342	-0.494	-0.361	2.518	0.723	2.292	1.973	1.593	0.952	-0.216	2.091	-1.119	6.462	2.229	3.003	3.042	1.911
CCRC.0038	2.819	0.891	0.042	0.454	0.272	0.289	3.778	-0.348	-1.928	-0.804	-0.919	-2.414	-2.21	-0.153	2.806	-1.419	3.384	0.382	0.576	0.175	-0.035
CCRC.0039	33.579	1.712	-0.462	0.978	0.098	0.891	-0.334	1.476	3.477	2.534	3.311	1.618	-0.975	0.268	1.017	1.182	3.306	2.316	3.694	3.372	4.1
CCRC.0040	11.208	1.184	-0.599	-0.816	-0.483	-0.322	1.157	0.336	1.286	1.48	1.707	-0.094	-0.283	-1.568	2.8	-1.124	3.097	0.621	1.099	0.743	0.987
CCRC.0041	34.044	2.887	-0.425	1.067	-0.083	0.465	1.34	1.328	1.155	2.059	2.144	1.174	1.32	0.209	3.477	-1.229	7.499	2.556	2.356	2.622	2.123
CCRC.0043	-20.42	-2.92	-4.913	-4.913	-2.92	-2.92	-0.547	0.793	-13.849	0.287	-0.487	-0.705	2.751	1.532	1.106	-1.49	1.815	2.027	1.683	2.15	1.1
CCRC.0044	25.411	2.145	1.348	2.324	1.305	1.305	1.082	-0.318	0.647	1.441	1.164	-0.205	-0.268	-1.806	4.14	3.149	2.226	1.228	1.361	1.792	1.351
CCRC.0045	25.456	1.956	-0.577	1.786	-1.191	1.582	2.622	-0.322	0.511	0.479	1.041	-0.337	1.519	-0.138	2.979	-0.545	9.021	1.079	0.99	1.556	1.445
CCRC.0046	19.709	0.455	-0.28	0.284	0.254	0.35	0	1.21	0.264	1.558	1.988	1.012	1.123	-1	2.582	-1.84	4.17	2.176	1.886	1.86	1.657
CCRC.0048	16.523	0.346	-0.393	-0.099	-2.972	-0.002	1.81	0.39	-1.339	0.943	0.875	-0.052	0.518	0.049	2.868	2.336	3.786	2.205	1.507	2.26	1.487
CCRC.0049	-71.535	-1.251	-16.2	1.349	1.397	1.349	1.54	-16.2	-16.2	-1.183	-0.758	-2.929	-2.09	-3.74	-16.2	1.307	1.874	-0.321	0.18	-1.768	-1.691
CCRC.0050	27.688	2.397	-0.665	-0.568	-0.068	1.804	2.66	1.394	1.342	1.035	1.045	0.77	0.19	-1.837	1.228	0.61	9.286	1.791	1.616	1.964	1.694
CCRC.0053	36.327	2.413	0.548	0.954	0.43	2.998	1.036	0.747	0.494	1.483	1.576	0.662	0.957	0.305	3.482	-1.334	9.713	2.684	2.375	2.702	2.102
CCRC.0055	35.012	1.513	1.683	1.706	1.764	1.847	3.86	0.222	-2.446	2.327	2.095	1.557	1.552	0.9	3.933	-0.071	3.816	2.452	2.102	2.439	1.761
CCRC.0057	-21.001	-0.295	-0.964	-1.493	0.822	-0.316	3.791	-0.214	0.146	-0.71	0.314	-2.004	-16.2	-3.54	1.932	-16.2	9.812	1.234	1.262	1.304	0.318
CCRC.0058	-6.079	2.518	-0.868	1.956	-0.187	-0.788	0.031	-1.143	-2.161	-0.327	-0.703	-2.481	-2.054	-4.572	3.139	-4.31	3.542	0.882	0.554	0.715	0.178
CCRC.0059	5.385	1.244	-0.371	1.006	-0.141	-0.392	-16.2	0.876	1.172	0.783	1.194	0.274	0.381	-1.525	2.201	1.647	8.107	1.301	1.254	1.662	0.912
CCRC.0061	-11.161	-0.318	-1.289	-1.108	-0.243	-0.688	-0.755	0.753	1.056	0.593	1.326	-0.455	-2.652	-14.729	1.631	-3.005	-0.227	2.18	2.656	2.117	1.996
CCRC.0063	-26.613	1.598	-1.88	-1.68	-0.945	-1.106	0.011	0.759	1.205	1.344	1.542	0.711	-16.2	-4.982	-16.2	-4.296	7.268	1.031	1.841	1.745	1.621
CCRC.0064	-141.675	-16.2	-16.2	-16.2	-16.2	-16.2	-0.164	-1.172	0.185	-1.188	-0.279	-1.685	-16.2	-16.2	-16.2	-16.2	9.802	-0.828	1.022	-0.849	-0.719
CCRC.0065	23.769	2.703	-0.744	2.016	-0.929	2.448	3.142	0.543	0.946	1.374	1.476	0.807	-1.223	-1.185	2.603	-2.421	4.233	1.906	1.821	2.086	2.167
CCRC.0066	29.339	1.133	1.053	1.33	1.453	0.135	2.865	0.409	0.409	1.231	1.461	0.466	-0.335	0.15	3.362	0.803	3.288	2.477	2.702	2.624	2.323
CCRC.0067	37.769	1.415	-0.144	-0.033	0.224	0.362	0.912	2.272	-1.055	2.91	2.454	2.348	1.909	1.059	2.846	1.833	3.45	4.109	3.715	4.107	3.076
CCRC.0068	-55.679	1.435	0.159	1.551	1.076	0.797	-0.636	-16.2	-1.38	-1.192	-0.273	-3.917	-16.2	-2.389	-15.241	-2.389	0.364	-2.039	0.019	-0.178	0.954
CCRC.0069	27.239	2.487	-2.15	1.967	1.338	2.574	2.178	-0.312	-0.387	0.71	0.857	-0.148	-0.407	-0.989	3.309	1.903	4.316	2.741	2.583	2.79	1.879
CCRC.0070	13.08	0.549	-0.364	-0.108	-0.105	0.734	3.63	0.682	0.186	0.596	0.937	-1.107	-1.208	-0.749	2.886	-0.795	2.328	1.304	2.012	1.358	0.314
CCRC.0071	12.714	-0.554	-0.284	-0.284	1.23	-0.437	2.969	0.608	-0.053	0.343	0.747	-0.7	-3.902	-1.723	3.763	3.48	3.061	1.083	1.795	0.847	0.725
CCRC.0072	33.872	1.611	-0.623	1.024	0.159	1.69	3.31	1.231	-3.947	2.602	1.778	1.655	1.112	0.524	2.592	-0.526	8.606	3.046	2.759	3.07	2.199
CCRC.0076	12.867	1.311	0.168	1.084	1.043	0.948	-1.047	-1.548	-2.195	0.325	1.092	-0.67	-0.486	0.172	4.726	-0.732	1.591	1.438	2.205	1.896	1.546
CCRC.0079	-95.95	0.396	-1.442	-16.2	-1.365	-1.245	1.194	-16.2	-16.2	-16.2	-4.441	-16.2	3.199	-16.2	3.436	-0.891	11.956	-1.923	-2.941	-0.973	-3.71
CCRC.0082	29.852	0.971	0.048	-0.065	0.01	0.94	4.008	0.734	-0.142	1.852	1.744	1.009	0.525	0.17	3.511	-0.242	3.552	2.99	2.836	2.972	2.429
CCRC.0083	13.248	1.944	-0.734	0.032	-0.406	0.362	0.526	1.434	-16.2	1.922	1.706	1.489	1.376	0.363	5.56	-0.578	1.664	3.52	3.105	3.471	2.692
CCRC.0084	-79.717	1.561	-1.813	-16.2	-16.2	-16.2	1.307	-2.303	-1.269	-1.832	-0.227	-16.2	-1.547	-3.684	-16.2	2.915	11.983	-1.132	0.108	-0.998	-1.786
CCRC.0089	30.997	1.776	-0.145	1.419	-0.586	-0.582	3.148	1.46	-1.305	2.576	1.484	1.172	1.199	0.18	0.829	0.386	8.998	2.843	2.196	2.693	1.256
CCRC.0090	29.844	0.936	-0.021	-0.186	0.209	0.342	3.608	0.881	0.584	0.597	1.325	0.281	0.874	-0.07	3.652	-0.809	7.852	2.568	2.551	2.562	2.108
CCRC.0092	22.743	2.543	-0.11	0.229	1.606	-0.159	0.957	0.553	0.039	0.397	0.377	-0.506	-0.723	-1.613	4.964	-0.337	6.424	2.158	2.098	2.272	1.574
CCRC.0093	31.669	0.725	-0.423	0.075	-0.091	0.895	1.402	1.598	0.546	1.955	1.817	1.286	1.192	0.446	2.307	1.206	5.564	2.754	2.633	3.07	2.712
CCRC.0094	24.45	2.931	1.38	1.911	1.031	1.611	1.346	0.867	0.557	1.082	1.488	0.144	-0.677	-0.036	4.691	-1.77	1.982	0.493	2.116	1.777	1.526
CCRC.0095	5.848	0.777	-2.69	0.88	-1.061	0.97	0.425	-1.817	1.816	-1.309	-0.331	-2.683	-0.964	-0.964	4.829	-1.989	9.899	-0.047	0.784	-0.562	-0.115
CCRC.0096	-127.115	-0.117	-16.2	-16.2	-16.2	1.127	-16.2	-16.2	-16.2	-1.23	-0.17	-3.242	-1.803	-14.711	4.046	-7.183	-1.028	-2.325	-0.181	-1.607	-1.491
CCRC.0098	41.697	1.219	-0.631	-0.663	0.051	0.036	3.848	2.339	1.443	2.717	1.858	0.385	2.387	2.245	1.925	0.552	9.028	3.585	3.102	3.498	2.773
CCRC.0108	16.237	1.652	0.164	-0.208	-1.066	0.682	3.662	0.496	0.365	1.086	1.072	0.403	-0.941	-1.445	1.886	-2.043	3.515	1.811	1.605	1.94	1.601
CCRC.0109	20.47	0.864	-1.195	-0.847	-0.231	-1.497	3.159	0.649	-0.218	1.407	1.123	0.887	0.738	-0.26	2.436	-0.685	6.952	2.037	1.582	2.254	1.315
CCRC.0112	4.161	1.053	-1.448	0.76	-0.443	-0.24	3.008	-0.341	-1.039	0.45	0.294	0.089	-1.804	-1.36	1.202	-2.321	2.43	0.991	1.306	1.176	0.398
CCRC.0113	33.222	2.357	0.873	1.933	0.377	2.261	3.296	1.071	-0.199	1.733	1.56	1.037	0.779	0.568	2.679	-0.008	4.307	2.503	2.173	2.473	1.449
CCRC.0114	17.791	1.603	-0.382	0.043	-0.245	0.255	3.832	0.372	0.039	0.796	0.636	-0.297	-0.428	-1.543	3.716	-1.537	3.802	2.055	1.516	1.922	1.636
CCRC.0115	34.938	2.487	-0.322	2.144	0.012	-0.068	0.848	1.489	1.106	1.85	2.112	1.327	0.829	-0.462	2.785	0.761	7.785	2.704	2.389	2.703	2.459
CCRC.0116	45.047	1.758	0.834	1.117	1.215	1.087	0.656	2.084	2.128	2.773	3.084	2.04	1.352	0.854	3.157	2.244	4.843	3.275	3.698	3.602	3.246
CCRC.0117	31.878	1.861	0.155	0.2	1.011	0.572	0.173	1.171	1.271	2.267	2.15	0.962	0.142	-0.459	2.025	-1.546	9.414	2.429	2.954	2.671	2.455
CCRC.0118	0.847	1.114	-2.61	0.613	1.374	1.079	2.068	-0.635	-0.82	-0.838	0	-2.131	-3.004	-3.082	1.039	-3.49	6.452	0.729	1.385	0.894	0.71
CCRC.0119	43.77	1.393	-0.856	-0.043	0.046	0.637	0.212	2.333	4.539	3.571	4.241	1.55	0.014	0.687	3.423	2.219	4.093	2.909	4.344	3.756	4.702
CCRC.0120	20.85	1.301	-0.305	-0.238	0.185	0.809	1.487	0.92	1.476	1.735	1.95	0.291	-0.499	-1.013	1.549	-0.768	3.671	1.384	2.289	2.018	2.608
CCRC.0121	17.342	1.531	-2.938	0.711	-0.325	-0.202	2.902	0.39	-0.522	-0.17	0.675	-0.138	-2.7	-3.452	3.389	-0.33	10.294	2.214	2.167	2.284	1.562
CCRC.0122	39.513	2.696	0.389	1.015	0.939	0.778	1.14	2.266	2.08	3.105	2.471	2.425	0.716	-0.049	3.249	-0.615	4.923	3.071	2.985	3.429	2.5
CCRC.0123	-9.898	2.262	-2.043	-0.937	1.499	0.967	1.836	-0.13	-0.387	0.305	0.123	0.051	-0.889	-2.902	1.526	-16.2	2.421	0.798	0.061	0.953	0.788
CCRC.0125	-15.536	0.256	-1.282	-0.003	-1.623	-1.448	1.442	-0.212	-0.245	0.398	0.458	0.005	5.332	-14.796	-16.2	-2.339	10.183	1.276	1.05	1.394	0.818
CCRC.0126	48.436	1.761	0.599	0.724	1.055	1.171	1.117	3.238	5.269	3.86	4.776	1.247	0.56	1.188	-0.69	1.21	2.871	3.452	5.039	4.626	5.363
CCRC.0127	18.73	0.356	-3.929	-1.205	-1.344	-0.88	3.617	0.995	-0.002	1.764	1.992	1.323	-0.695	-1.211	3.143	-1.063	7.585	2.347	1.83	2.341	1.766
CCRC.0128	32.396	2.147	0.185	1.495	0.164	0.386	0.713	0.878	0.964	1.221	1.899	0.915	0.501	-0.026	2.42	1.454	8.404	1.853	2.258	2.302	2.263
CCRC.0129	53.764	1.829	0.545	0.737	1.047	1.116	2.067	3.26	5.275	3.971	4.825	1.699	0.745	1.394	2.16	1.2	3.271	3.694	5.015	4.577	5.337
CCRC.0130	42.342	2.181	1.548	1.682	1.703	1.843	0.77	1.313	3.988	2.917	3.711	0.866	-0.309	-0.017	3.448	0.769	1.278	2.299	4.058	3.736	4.558
CCRC.0131	10.14	0.148	-5.77	-0.996	-1.868	-0.418	2.891	0.775	-1.044	0.953	0.825	0.301	-1.823	-2.579	5.083	-1.049	7.162	2.136	2.045	2.196	1.172
CCRC.0132	-174.7	-16.2	0.828	-16.2	-16.2	1.44	-1.531	5.677	-16.2	-16.2	-16.2	-16.2	-16.2	3.137	1.282	3.079	5.788	-16.2	-16.2	-16.2	-16.2
CCRC.0133	-19.666	0.209	0.785	-0.93	-1.526	2.402	-0.88	0.306	-16.2	-0.126	-0.07	-1.058	0.027	1.444	-16.2	0.602	4.769	2.274	1.902	2.076	0.528
CCRC.0135	-12.623	0.373	0.841	0.841	1.023	1.014	3.436	1.393	-0.299	0.645	0.274	0.142	-4.691	-14.266	4.786	-16.2	1.857	2.136	1.675	2.175	0.222
CCRC.0136	-112.6	2.004	-16.2	1.904	-16.2	-16.2	-2.634	6.185	-16.2	-4.042	-1.021	-16.2	4.858	3.727	4.285	2.277	5.894	-16.2	-6.437	-16.2	-16.2
CCRC.0139	7.623	0.294	0.896	0.896	1.089	0.847	2.945	0.272	-0.125	1.166	0.831	0.584	-16.2	-3.381	4.297	2.905	2.043	2.536	2.09	2.656	0.982
CCRC.0141	-7.885	-1.34	-2.727	-2.908	-1.536	-2.314	2.882	0.724	1.722	1.865	1.51	1.347	-4.302	-3.276	-3.848	-4.27	-1.367	2.842	2.282	3.013	1.816
CCRC.0142	14.686	0.71	-0.145	-0.702	-1.658	1.647	-2.621	1.09	-0.126	2.339	1.806	1.633	-1.271	0.536	-2.094	-0.225	2.268	3.309	2.979	3.194	2.017
CCRC.0145	12.267	2.229	-1.013	-1.266	1.362	-1.322	0.511	-0.31	-0.052	-0.411	-0.547	-0.483	1.461	0.147	0.186	0.704	5.476	1.404	1.064	1.673	1.454
CCRC.0146	-131.163	-0.99	-16.2	-16.2	-16.2	-16.2	-16.2	-0.764	-1.017	-16.2	-3.974	-0.518	-16.2	-1.197	-16.2	2.089	4.068	0.647	-0.973	0.35	0.716
CCRC.0147	21.718	1.205	-0.99	0.036	-0.15	-0.604	0.555	1.25	-5.282	2.019	1.754	1.518	0.728	2.307	1.862	0.499	3.441	3.294	2.883	3.235	2.158
CCRC.0150	-90.578	-1.587	-2.483	-4.59	-1.461	-2.11	4.356	-16.2	-16.2	-1.548	-2.062	-3.449	-16.2	-16.2	1.696	-16.2	4.007	0.785	-0.688	0.402	-0.846
CCRC.0151	3.782	0.09	-1.247	-0.925	-0.554	-0.96	2.381	1.969	2.093	1.29	0.948	0.479	-12.768	-5.309	0.642	0.273	7.125	2.529	1.929	2.652	1.145
CCRC.0204	26.661	1.185	0.049	0.165	-0.182	-0.054	2.694	0.107	-0.26	1.509	1.548	0.446	0.453	-0.407	3.853	-0.875	7.76	2.046	2.472	2.311	1.841
CCRC.0205	10.754	1.749	0.162	1.465	-0.554	-0.817	4.622	0.056	-16.2	1.008	0.621	0.396	1.01	-0.315	2.594	1.685	5.754	2.389	1.937	2.196	0.996
CCRC.0207	32.875	1.56	2.131	1.746	1.666	2.697	5.011	-0.471	-0.739	0.859	0.623	-0.056	1.223	1.102	3.646	-0.74	6.579	1.677	1.605	1.621	1.135
CCRC.0208	37.912	1.692	-0.366	0.673	0.749	1.146	0.393	1.133	1.002	2.814	2.54	2.192	1.371	1.112	2.888	0.933	5.829	2.821	3.257	2.974	2.759
CCRC.0211	-36.572	-0.338	-0.402	-0.402	-0.549	-0.549	-0.137	-16.2	-0.74	0.801	0.969	-0.444	-2.268	-2.095	2.198	0.853	-16.2	0.249	1.213	-1.202	-1.329
CCRC.0212	29.639	1.437	0.474	0.538	-0.027	-0.04	0.868	0.844	-0.02	1.86	1.704	0.969	0.435	0.423	3.403	0.398	6.258	2.667	2.626	2.688	2.134
CCRC.0213	10.525	0.393	1.214	1.214	1.284	1.322	0.575	-0.893	-0.192	-0.336	0.154	-1.651	-1.264	-2.496	-1.424	-0.144	9.43	0.587	1.429	0.894	0.429
CCRC.0214	31.245	0.499	-0.287	-0.26	-0.429	-0.173	-1.007	1.396	0.91	2.512	2.309	1.987	0.784	-0.444	2.576	1.155	7.531	3.455	3.03	3.425	2.276
CCRC.0215	34.64	0.949	0.119	0.362	0.153	0.353	-0.233	2.042	0.091	2.582	2.459	2.108	0.783	0.083	1.761	0.462	6.882	3.873	3.427	3.658	2.726
CCRC.0217	-9.67	-0.137	-1.006	-1.596	-1.304	-0.63	-0.472	1.709	1.447	1.444	1.749	0.068	0.608	-0.357	-16.2	-2.467	5.849	0.271	1.503	0.23	-0.379
CCRC.0218	-119.921	-16.2	-16.2	-16.2	-16.2	-4.212	-16.2	-2.09	-1.906	-16.2	-1.979	-3.922	5.396	3.412	3.374	-5.225	6.464	-13.997	-1.872	-4.126	-2.038
CCRC.0219	31.084	0.941	-0.309	1.077	0.461	-0.18	3.795	0.02	1.078	0.523	0.874	-0.64	0.949	0.763	1.664	1.579	10.156	2.167	2.187	2.325	1.654
CCRC.0220	31.511	0.859	-2.037	-1.107	-0.391	-0.259	4.043	1.603	1.926	2.372	2.296	1.841	-0.354	-1.493	2.776	-1.142	8.584	3.419	2.577	3.212	2.786
CCRC.0221	9.656	0.102	-0.288	0.929	0.928	0.944	3.659	-0.618	0.435	-0.057	0.314	-2.09	-1.34	-1.173	-2.554	-2.575	8.188	1.276	1.391	1.364	0.821
CCRC.0222	17.418	0.565	0.782	1.03	0.7	0.632	3.959	-0.386	-0.016	0.796	0.816	-0.422	-1.323	-0.094	2.591	0.125	3.913	0.972	1.495	0.666	0.617
CCRC.0223	-144.077	-16.2	-16.2	-16.2	-16.2	-16.2	-1.64	-16.2	-1.876	-3.107	-16.2	-5.171	-4.916	-5.484	-3.408	-3.177	-0.255	-0.241	-0.28	0.331	-1.453
CCRC.0225	-62.853	-3.068	-1.833	-4.408	-2.941	-3.439	-4.556	0.671	-16.2	-0.81	-0.403	-2.088	-16.2	-16.2	-3.263	-0.91	7.136	1.879	1.368	1.938	0.474
CCRC.0226	38.059	1.387	0.101	0.488	0.082	0.421	4.141	2.195	-2.292	3.088	2.585	2.595	1.95	1.146	2.78	0.112	4.818	3.939	2.447	3.479	2.597
CCRC.0228	15.344	0.609	-0.064	0.271	-0.805	-0.331	-0.042	0.323	1.411	-0.291	1.38	-0.053	0.115	-2.56	2.665	-2.301	8.757	1.447	2.071	1.317	1.425
CCRC.0230	32.383	0.694	-1.614	-0.593	-0.636	-0.161	3.241	1.532	3.225	2.497	1.676	1.978	1.508	1.274	2.94	0.473	3.319	3.284	2.138	3.044	2.564
CCRC.0232	33.09	1.583	0.569	-0.093	-0.102	0.28	2.317	0.377	0.95	2.701	1.953	1.089	1.727	1.282	1.624	0.18	6.415	2.53	2.472	2.794	2.442
CCRC.0233	32.659	1.97	0.457	-0.089	0.578	0.652	4.604	1.716	1.323	2.539	2.284	1.91	0.801	0.23	2.222	-1.479	1.443	2.859	2.706	2.992	2.941
CCRC.0235	27.603	0.947	0.35	0.455	-0.164	0.263	4.677	-0.076	-0.764	2.546	2.122	2.077	0.655	0.048	2.759	-0.838	2.169	2.844	2.264	2.874	2.395
CCRC.0237	27.111	1.629	0.597	1.175	0.777	0.97	3.506	-0.403	-0.461	0.659	0.542	-1.011	0.748	-1.097	1.878	-1.948	10.442	2.548	2.098	2.533	1.929
CCRC.0238	23.31	0.924	-0.831	-0.043	-1.288	-0.521	1.66	1.056	1.643	1.621	1.704	1.187	-0.096	-1.784	1.913	-1.139	9.508	2.64	1.146	2.365	1.645
CCRC.0239	-112.749	-3.135	-2.058	-3.135	-16.2	-16.2	-16.2	-16.2	-0.792	-0.924	-2.488	-0.924	-0.801	-16.2	-16.2	-16.2	8.737	2.592	1.188	1.953	0.438
CCRC.0240	23.125	1.19	-1.247	-2.108	-1.09	-1.161	2.598	1.764	-1.267	1.673	1.328	1.385	0.74	0.262	3.475	-0.839	6.987	2.912	2.155	2.844	1.524
CCRC.0242	15.601	0.431	-1.16	-0.356	-0.837	-0.829	1.253	1.44	-0.972	2.275	1.372	0.962	0.878	-0.02	0.574	0.396	1.912	2.508	1.938	2.49	1.346
CCRC.0243	-36.007	-16.2	-2.145	-2.389	-1.934	-1.781	-2.241	-0.282	1.821	1.678	1.065	-0.3	-16.2	-2.293	-1.829	-1.511	4.229	0.647	0.885	1.249	1.524
CCRC.0244	-55.957	-1.181	-3.19	-2.228	-2.429	-2.495	1.351	0.883	-16.2	1.006	0.298	-0.534	-3.301	-16.2	-16.2	-3.149	2.387	1.839	1.201	1.855	0.33
CCRC.0246	42.419	1.597	0.625	0.663	0.588	0.975	4.22	1.785	0.2	2.392	1.998	1.644	1.98	1.256	3.278	2.024	4.393	3.522	3.095	3.514	2.67
CCRC.0247	27.77	1.03	0.547	0.368	0.148	0.109	0.695	0.542	0.498	2.244	1.972	1.611	-0.594	0.241	2.696	0.575	6.123	2.207	2.433	2.438	1.887
CCRC.0248	-9.861	1.082	-0.802	1.098	0.526	-1.059	-1.587	-2.288	-0.874	0.54	0.817	-0.836	-1.927	-2.305	-3.398	-1.853	0.898	0.773	1.633	-0.3	0.001
CCRC.0249	26.151	1.623	0.279	0.976	0.799	1.054	4.195	-0.75	-16.2	3.603	2.992	2.669	2.079	1.433	1.63	0.745	5.088	3.457	3.313	3.717	3.449
CCRC.0250	-99.953	1.34	-3.528	1.283	-14.646	-1.951	3.865	-0.9	-16.2	-2.639	-16.2	-16.2	-1.385	-16.2	-1.739	-16.2	8.009	-0.686	-1.933	-1.83	-2.213
CCRC.0251	21.886	-0.255	-0.83	-1.067	-0.935	-0.839	-0.108	1.427	-2.143	3.132	2.561	2.481	1.477	0.294	1.008	-0.568	2.786	3.768	3.268	3.739	2.69
CCRC.0252	26.945	1.936	-1.028	-0.8	1.433	0.273	1.77	2.175	-2.157	1.419	1.358	1.004	0.465	-1.176	2.265	-0.834	9.333	2.654	2.251	2.624	1.98
CCRC.0253	42.039	1.095	0.574	0.597	1.609	1.681	1.989	2.314	-1.746	3.109	2.063	2.091	2.672	1.737	3.503	1.03	3.981	3.977	3.378	3.855	2.53
CCRC.0255	-57.506	0.555	1.282	-0.971	3.8	-2.035	4.611	1.653	-16.2	-1.569	-1.669	-16.2	0.047	-16.2	2.193	-16.2	3.046	-0.494	-0.738	-0.28	-2.137
CCRC.0256	10.888	0.225	-1.9	-2.137	-1.047	-1.747	1.158	0.782	0.692	1.4	1.107	0.228	-0.713	-0.89	-3.099	-1.295	9.827	2.308	1.841	2.359	1.789
CCRC.0257	25.619	0.567	-1.567	-0.689	-1.418	-0.765	1.986	1.808	1.957	2.123	2.217	1.651	0.929	0.61	2.13	-0.238	3.561	2.671	2.646	2.836	2.604
CCRC.0259	26.858	0.476	-0.458	-0.412	0.235	-0.52	3.673	2.301	0.886	2.557	2.211	1.45	0.25	-1.277	0.404	-0.049	3.718	2.686	2.902	2.824	3.001
CCRC.0265	0.062	0.3	-0.708	-0.708	0.008	-0.008	4.912	0.709	-16.2	1.447	0.362	0.167	1.007	0.944	0.644	-0.061	-0.772	2.606	2.058	2.611	0.744
CCRC.0323	40.826	1.188	0.459	0.541	0.73	0.76	1.307	2.046	0.655	2.617	1.665	0.858	2.594	2.04	3.976	0.969	5.954	3.673	3.092	3.559	2.143
CCRC.0381	-53.292	0.188	-2.064	-3.299	-1.71	0.631	0.557	-16.2	1.51	-16.2	-0.59	-16.2	-0.167	-3.791	2.915	1.337	2.82	-0.169	0.472	-1.577	-1.755
CCRC.0382	41.036	1.515	0.586	1.042	0.081	0.749	-0.15	2.094	0.883	3.053	2.803	2.093	2.576	1.908	3.022	0.937	3.617	3.845	3.543	3.778	3.061
CCRC.0397	27.95	1.501	0.639	0.549	1.074	0.816	3.488	0.043	0.126	1.742	1.631	0.993	-0.227	-2.025	3.592	-1.19	6.016	2.182	2.244	2.476	2.28
CCRC.0398	13.69	0.797	-0.382	-0.319	0.163	-0.767	0.637	-0.045	1.012	1.462	1.817	0.395	0.238	-2.366	1.082	-1.035	1.331	2.248	2.496	2.484	2.442

## Sheet: Table S2h
NAME	GS<br> follow link to MSigDB	GS DETAILS	SIZE	ES	NES	NOM p-val	FDR q-val	FWER p-val	RANK AT MAX	LEADING EDGE
GOBP_MRNA_PROCESSING	GOBP_MRNA_PROCESSING	Details ...	365	-0.56765	-2.57134	0	0	0	1525	tags=48%, list=21%, signal=58%
GOBP_NCRNA_METABOLIC_PROCESS	GOBP_NCRNA_METABOLIC_PROCESS	Details ...	304	-0.631648	-2.82397	0	0	0	1502	tags=53%, list=21%, signal=64%
GOBP_NCRNA_PROCESSING	GOBP_NCRNA_PROCESSING	Details ...	262	-0.658953	-2.92736	0	0	0	947	tags=47%, list=13%, signal=52%
GOBP_RIBONUCLEOPROTEIN_COMPLEX_BIOGENESIS	GOBP_RIBONUCLEOPROTEIN_COMPLEX_BIOGENESIS	Details ...	342	-0.632277	-2.84069	0	0	0	1261	tags=49%, list=17%, signal=57%
GOBP_RIBOSOMAL_LARGE_SUBUNIT_BIOGENESIS	GOBP_RIBOSOMAL_LARGE_SUBUNIT_BIOGENESIS	Details ...	62	-0.727596	-2.67715	0	0	0	835	tags=52%, list=12%, signal=58%
GOBP_RIBOSOME_BIOGENESIS	GOBP_RIBOSOME_BIOGENESIS	Details ...	235	-0.698917	-3.08535	0	0	0	947	tags=52%, list=13%, signal=58%
GOBP_RRNA_METABOLIC_PROCESS	GOBP_RRNA_METABOLIC_PROCESS	Details ...	179	-0.702599	-3.00456	0	0	0	947	tags=53%, list=13%, signal=60%
GOBP_COMPLEMENT_ACTIVATION	GOBP_COMPLEMENT_ACTIVATION	Details ...	57	0.707914	3.00122	0	0	0	1507	tags=75%, list=21%, signal=95%
GOBP_EXTERNAL_ENCAPSULATING_STRUCTURE_ORGANIZATION	GOBP_EXTERNAL_ENCAPSULATING_STRUCTURE_ORGANIZATION	Details ...	221	0.624885	3.28302	0	0	0	1074	tags=51%, list=15%, signal=58%
GOBP_HUMORAL_IMMUNE_RESPONSE_MEDIATED_BY_CIRCULATING_IMMUNOGLOBULIN	GOBP_HUMORAL_IMMUNE_RESPONSE_MEDIATED_BY_CIRCULATING_IMMUNOGLOBULIN	Details ...	39	0.709855	2.76292	0	0	0	1507	tags=79%, list=21%, signal=100%
GOBP_REGULATION_OF_COMPLEMENT_ACTIVATION	GOBP_REGULATION_OF_COMPLEMENT_ACTIVATION	Details ...	44	0.72411	2.94147	0	0	0	1507	tags=82%, list=21%, signal=103%
GOBP_REGULATION_OF_HUMORAL_IMMUNE_RESPONSE	GOBP_REGULATION_OF_HUMORAL_IMMUNE_RESPONSE	Details ...	49	0.709789	2.87602	0	0	0	1507	tags=80%, list=21%, signal=100%

## Sheet: Table S2i
NAME	GS<br> follow link to MSigDB	GS DETAILS	SIZE	ES	NES	NOM p-val	FDR q-val	FWER p-val	RANK AT MAX	LEADING EDGE
GOBP_EXTERNAL_ENCAPSULATING_STRUCTURE_ORGANIZATION	GOBP_EXTERNAL_ENCAPSULATING_STRUCTURE_ORGANIZATION	Details ...	87	0.550021	2.47878	0	0	0	619	tags=43%, list=18%, signal=51%
GOBP_COMPLEMENT_ACTIVATION	GOBP_COMPLEMENT_ACTIVATION		33	0.518517	1.96821	0	0.00966075	0.618	847	tags=55%, list=25%, signal=72%
GOBP_ACUTE_INFLAMMATORY_RESPONSE	GOBP_ACUTE_INFLAMMATORY_RESPONSE		31	0.490611	1.8033	0.00621118	0.0262069	0.992	953	tags=52%, list=28%, signal=71%
GOBP_HUMORAL_IMMUNE_RESPONSE_MEDIATED_BY_CIRCULATING_IMMUNOGLOBULIN	GOBP_HUMORAL_IMMUNE_RESPONSE_MEDIATED_BY_CIRCULATING_IMMUNOGLOBULIN		29	0.489711	1.76644	0	0.0306781	0.999	847	tags=55%, list=25%, signal=73%
GOBP_HUMORAL_IMMUNE_RESPONSE	GOBP_HUMORAL_IMMUNE_RESPONSE		68	0.336855	1.46211	0.0229885	0.132617	1	847	tags=37%, list=25%, signal=48%
GOBP_RRNA_METABOLIC_PROCESS	GOBP_RRNA_METABOLIC_PROCESS	Details ...	124	-0.727746	-3.00521	0	0	0	343	tags=55%, list=10%, signal=59%
GOBP_NCRNA_PROCESSING	GOBP_NCRNA_PROCESSING	Details ...	151	-0.696088	-2.99054	0	0	0	393	tags=50%, list=12%, signal=54%
GOBP_RIBOSOME_BIOGENESIS	GOBP_RIBOSOME_BIOGENESIS	Details ...	149	-0.704741	-2.96628	0	0	0	343	tags=49%, list=10%, signal=52%
GOBP_RIBONUCLEOPROTEIN_COMPLEX_BIOGENESIS	GOBP_RIBONUCLEOPROTEIN_COMPLEX_BIOGENESIS	Details ...	211	-0.649946	-2.87136	0	0	0	648	tags=52%, list=19%, signal=60%
GOBP_NCRNA_METABOLIC_PROCESS	GOBP_NCRNA_METABOLIC_PROCESS	Details ...	183	-0.651826	-2.80676	0	0	0	393	tags=45%, list=12%, signal=49%
GOBP_MRNA_PROCESSING	GOBP_MRNA_PROCESSING	Details ...	200	-0.63016	-2.75931	0	0	0	960	tags=68%, list=28%, signal=89%

[truncated: 1 more sheets: Table S2j]
