# Supplementary material for: The Association of R-Loop Binding Proteins Subtypes with CIN Implicates Therapeutic Strategies in Colorectal Cancer
Source: Cancers (Basel). 2022 Nov 15;14(22):5607. doi: 10.3390/cancers14225607 (PMC9688457; doi:10.3390/cancers14225607)
Supplement: Supplementary file 1 [file cancers-14-05607-s001.zip › Table S3.xlsx]

## Sheet: Description
Table S3: Immune characteristics of CI and CII. Related to Figure 4 and S4.
Sheet	Description
Table S3a	The stromal score, Immune Score, ESTIMATE Score, Tumor Purity between two clusters in 2014 CPTAC CRC database by Estimate
Table S3b	The stromal score, Immune Score, ESTIMATE Score, Tumor Purity between two clusters in 2019 CPTAC CRC database by Estimate
Table S3c	Lymphocytes Fraction between two clusters in 2014 CPTAC CRC database by TIL.
Table S3d	Lymphocytes Fraction between two clusters in 2014 CPTAC CRC database by cibersort.
Table S3e	RLBPs proteins expression and Lymphocytes Fraction in 2014 CPTAC CRC database by xcell.
Table S3f	RLBPs proteins expression and Lymphocytes Fraction in 2019 CPTAC TMT CRC database by xcell.
Table S3g	RLBPs proteins expression and Lymphocytes Fraction in 2019 CPTAC Label free CRC database by xcell.
Table S3h	78 immunomodulators genes differentially expressed in two clusters in 2014 or 2019 CRC RNA-seq databases.
Table S3i	78 immunomodulators genes differentially expressed in two clusters in 2014 CPTAC, 2019 CPTAC, 2020 Cancer cell CRC proteomic databases.

## Sheet: Table S3a
Sample name	Stromal Score	Immune Score	ESTIMATE Score	Tumor Purity	Cluster
TCGA.A6.3807.01	-465.034	854.996	389.962	0.788624	II
TCGA.A6.3808.01	237.339	1247.37	1484.71	0.680079	II
TCGA.A6.3810.01	242.939	1148.4	1391.34	0.690064	II
TCGA.AA.3518.01	-997.478	993.972	-3.50579	0.822802	II
TCGA.AA.3525.01	-1197.99	605.283	-592.702	0.868818	II
TCGA.AA.3529.01	-1168.8	139.994	-1028.81	0.898713	II
TCGA.AA.3531.01	-1389.61	-47.1116	-1436.72	0.923345	I
TCGA.AA.3534.01	-896.815	73.5146	-823.3	0.885077	II
TCGA.AA.3552.01	-826.089	1171.25	345.159	0.79265	II
TCGA.AA.3554.01	28.6579	1583.37	1612.03	0.66626	II
TCGA.AA.3561.01	-1135.57	276.39	-859.183	0.887517	I
TCGA.AA.3664.01	-1458.41	216.764	-1241.64	0.911973	I
TCGA.AA.3666.01	-945.092	754.89	-190.202	0.838066	I
TCGA.AA.3672.01	-508.197	1589.2	1081	0.722306	I
TCGA.AA.3684.01	475.387	1365.57	1840.96	0.640829	II
TCGA.AA.3710.01	-277.952	2041.36	1763.41	0.649527	I
TCGA.AA.3715.01	334.614	1819.92	2154.53	0.604827	II
TCGA.AA.3818.01	-1153.39	209.667	-943.72	0.893166	II
TCGA.AA.3848.01	-1176.65	317.813	-858.84	0.887493	I
TCGA.AA.3864.01	-677.146	351.119	-326.028	0.848776	I
TCGA.AA.3986.01	-708.112	1584.16	876.049	0.742781	II
TCGA.AA.3989.01	-339.284	998.014	658.73	0.763758	I
TCGA.AA.A004.01	-508.753	990.636	481.883	0.780256	II
TCGA.AA.A00A.01	-631.777	738.202	106.424	0.813524	II
TCGA.AA.A00E.01	-729.509	1115.53	386.019	0.788979	I
TCGA.AA.A00F.01	-697.53	143.813	-553.718	0.865971	II
TCGA.AA.A00J.01	-690.817	369.312	-321.506	0.848425	I
TCGA.AA.A00K.01	-1093.41	361.667	-731.746	0.878742	II
TCGA.AA.A00N.01	-16.5907	623.572	606.982	0.768639	II
TCGA.AA.A00O.01	-294.695	330.088	35.3934	0.819543	II
TCGA.AA.A00R.01	-446.661	2066.71	1620.05	0.665381	I
TCGA.AA.A00U.01	-1293.85	-7.2928	-1301.14	0.915521	I
TCGA.AA.A010.01	-1237.8	256.685	-981.113	0.895621	II
TCGA.AA.A017.01	-804.235	256.106	-548.129	0.86556	I
TCGA.AA.A01C.01	-567.066	162.857	-404.209	0.854788	II
TCGA.AA.A01D.01	-206.625	696.87	490.245	0.779487	II
TCGA.AA.A01F.01	-1976.46	-196.775	-2173.24	0.959385	I
TCGA.AA.A01I.01	-1471.38	152.612	-1318.77	0.916559	I
TCGA.AA.A01K.01	-387.229	613.976	226.746	0.803127	II
TCGA.AA.A01P.01	-17.152	1844.76	1827.61	0.642332	II
TCGA.AA.A01R.01	-835.35	1570.1	734.746	0.756508	I
TCGA.AA.A01S.01	-1918.76	-481.191	-2399.96	0.96824	I
TCGA.AA.A01T.01	-1493.31	26.7309	-1466.58	0.925019	I
TCGA.AA.A01V.01	-1900.89	423.453	-1477.44	0.925624	II
TCGA.AA.A01X.01	-1220.15	59.2055	-1160.95	0.90705	I
TCGA.AA.A01Z.01	-1560.44	-481.192	-2041.63	0.953757	I
TCGA.AA.A022.01	-628.504	1377.79	749.286	0.755111	I
TCGA.AA.A024.01	-1615.84	-48.3871	-1664.23	0.935651	II
TCGA.AA.A029.01	-1673.66	-171.51	-1845.17	0.944693	I
TCGA.AA.A02E.01	-1439.24	93.3882	-1345.86	0.918142	II
TCGA.AA.A02H.01	-1089.67	16.5269	-1073.15	0.901548	I
TCGA.AA.A02J.01	-2013.02	-707.29	-2720.31	0.978923	I
TCGA.AA.A02O.01	-1331.95	273.638	-1058.31	0.900604	I
TCGA.AA.A02R.01	-373.5	1657.56	1284.06	0.701375	II
TCGA.AA.A03F.01	-1379.12	544.735	-834.382	0.885833	II
TCGA.AA.A03J.01	-738.799	843.259	104.46	0.813692	I
TCGA.AF.2691.01	-585.027	943.157	358.13	0.791488	I
TCGA.AF.2692.01	-893.105	310.351	-582.754	0.868094	I
TCGA.AF.3400.01	945.33	2272.78	3218.11	0.473648	II
TCGA.AF.3913.01	-536.988	45.6784	-491.309	0.861353	II
TCGA.AG.3574.01	-1022.54	264.332	-758.205	0.88059	II
TCGA.AG.3580.01	-1204.4	732.68	-471.722	0.859889	I
TCGA.AG.3584.01	-586.045	594.573	8.52781	0.821797	I
TCGA.AG.3593.01	-954.866	909.178	-45.6884	0.826305	I
TCGA.AG.3594.01	-834.136	1537.44	703.303	0.759518	I
TCGA.AG.4007.01	-388.496	909.101	520.605	0.776688	I
TCGA.AG.A002.01	-1658.89	-685.277	-2344.16	0.96616	I
TCGA.AG.A008.01	-1974.06	-100.129	-2074.19	0.955183	I
TCGA.AG.A00C.01	-1850.85	123.799	-1727.05	0.938866	I
TCGA.AG.A00H.01	-401.566	4.93105	-396.635	0.85421	I
TCGA.AG.A00Y.01	-1442.82	447.532	-995.288	0.896544	I
TCGA.AG.A011.01	-966.182	210.141	-756.041	0.880439	I
TCGA.AG.A014.01	-1375.42	-217.225	-1592.64	0.931891	I
TCGA.AG.A015.01	-1706.19	-246.445	-1952.63	0.949749	II
TCGA.AG.A016.01	-1630.53	-637.054	-2267.59	0.9632	I
TCGA.AG.A01J.01	-1593.84	42.2433	-1551.6	0.929688	II
TCGA.AG.A01L.01	-1498.09	-117.379	-1615.47	0.933101	I
TCGA.AG.A01N.01	-1363.35	-369.835	-1733.18	0.939175	I
TCGA.AG.A01W.01	-1425.78	289.662	-1136.12	0.905509	I
TCGA.AG.A01Y.01	-753.278	494.307	-258.97	0.84353	II
TCGA.AG.A020.01	-1936.03	-344.365	-2280.39	0.963704	I
TCGA.AG.A026.01	-1148.07	-414.75	-1562.82	0.930294	I
TCGA.AG.A02N.01	-1593.71	453.95	-1139.76	0.905736	I
TCGA.AG.A02X.01	-1663.97	-199.978	-1863.94	0.945594	I
TCGA.AG.A032.01	-1246.16	70.6334	-1175.52	0.907948	I
TCGA.AG.A036.01	-880.563	219.723	-660.841	0.873727	I

## Sheet: Table S3b
Sample name	StromalScore.y	ImmuneScore.y	ESTIMATEScore.y	TumorPurity.y	RF-Cluster
01CO001	-368.881	573.316	204.435	0.805074	II
01CO005	-1102.3	-427.027	-1529.32	0.928479	II
01CO006	466.175	1542.02	2008.2	0.621792	II
01CO008	-1122.84	-54.7177	-1177.56	0.908074	II
01CO015	-237.514	561.061	323.547	0.79458	I
01CO019	-735.6	-168.717	-904.318	0.89055	I
01CO022	-1014.57	-14.2549	-1028.83	0.898714	I
05CO002	1397.38	865.599	2262.98	0.592074	II
05CO003	254.33	915.559	1169.89	0.713221	I
05CO006	-125.245	714.28	589.035	0.770322	II
05CO007	300.558	1258.97	1559.53	0.671987	II
05CO011	-564.083	-531.733	-1095.82	0.902983	I
05CO015	408.482	1362.69	1771.17	0.648659	I
05CO020	93.563	322.625	416.188	0.786251	I
05CO026	-388.168	-81.4818	-469.65	0.859734	I
05CO028	-737.672	557.486	-180.185	0.837263	I
05CO029	-637.787	952.383	314.596	0.795377	I
05CO032	403.485	979.355	1382.84	0.690966	I
05CO033	1082.17	1782.78	2864.95	0.518647	II
05CO034	244.801	270.734	515.535	0.777156	I
05CO035	214.767	203.973	418.741	0.786019	I
05CO037	750.422	743.938	1494.36	0.67904	II
05CO039	-959.909	385.812	-574.097	0.867463	I
05CO041	-293.306	1065.3	771.99	0.752921	I
05CO044	-577.886	-530.034	-1107.92	0.903745	II
05CO045	385.746	969.765	1355.51	0.69386	I
05CO048	125.361	547.82	673.18	0.762387	I
05CO049	-279.759	776.455	496.696	0.778894	I
05CO050	-1174.78	54.8315	-1119.95	0.904499	II
05CO053	-884.477	328.354	-556.123	0.866147	I
05CO054	-1256.28	451.863	-804.416	0.883784	I
06CO001	-481.031	78.3623	-402.669	0.854671	I
06CO002	675.128	664.514	1339.64	0.695536	II
09CO005	-264.717	152.727	-111.99	0.831747	II
09CO006	-235.171	548.436	313.265	0.795496	I
09CO008	57.2973	436.356	493.653	0.779174	I
09CO011	-581.256	401.483	-179.773	0.83723	I
09CO013	-246.585	27.5994	-218.985	0.840364	I
09CO014	331.339	1278.49	1609.83	0.6665	I
09CO015	-105.743	701.535	595.792	0.769689	I
09CO018	296.939	1329.08	1626.01	0.664728	I
09CO019	-368.659	210.684	-157.975	0.835476	I
09CO022	-753.162	594.973	-158.188	0.835493	I
11CO005	608.613	878.886	1487.5	0.679779	II
11CO007	-328.265	806.528	478.263	0.780588	I
11CO008	776.609	715.233	1491.84	0.679312	II
11CO010	189.82	767.294	957.114	0.734762	I
11CO018	515.869	1077.71	1593.58	0.668277	I
11CO019	881.786	686.488	1568.27	0.671036	I
11CO020	61.6537	327.539	389.193	0.788693	II
11CO021	1010.01	781.908	1791.92	0.646339	I
11CO022	-243.522	826.348	582.826	0.770903	I
11CO027	-252.138	124.419	-127.719	0.833027	I
11CO030	437.963	683.547	1121.51	0.718181	II
11CO031	57.035	1319.86	1376.9	0.691596	I
11CO032	-53.0436	872.348	819.305	0.748333	II
11CO033	1000.37	1554.88	2555.25	0.556966	II
11CO036	237.703	1057.77	1295.47	0.700179	I
11CO037	127.285	587.336	714.621	0.758437	II
11CO039	-430.198	170.933	-259.265	0.843554	I
11CO042	-534.257	-78.8118	-613.068	0.870295	I
11CO043	-746.051	-208.498	-954.549	0.89388	I
11CO044	499.34	1236.74	1736.08	0.652571	I
11CO045	554.044	641.002	1195.05	0.710628	II
11CO047	351.446	264.333	615.779	0.767813	I
11CO048	1203.67	1310.45	2514.12	0.56197	II
11CO052	668.214	1800	2468.22	0.56753	I
11CO053	-69.4192	553.951	484.532	0.780012	I
11CO054	-193.008	1263.69	1070.68	0.723353	I
11CO057	295.98	465.639	761.619	0.753922	I
11CO058	433.393	500.396	933.789	0.73708	II
11CO060	-407.329	547.331	140.002	0.810648	I
11CO061	794.57	1679.39	2473.96	0.566837	II
11CO062	536.436	637.167	1173.6	0.712839	I
11CO070	930.627	1260.3	2190.93	0.600564	I
11CO072	175.708	741.621	917.329	0.738711	I
11CO077	806.525	709.298	1515.82	0.676724	II
11CO079	-545.804	-358.884	-904.688	0.890575	II
14CO002	-1196.47	-100.377	-1296.85	0.915267	I
14CO003	-372.181	628.343	256.163	0.800547	I
14CO005	-114.956	715.906	600.95	0.769205	II
15CO001	-166.186	-265.182	-431.368	0.85685	I
15CO002	168.801	918.164	1086.96	0.7217	I
16CO002	-278.621	-59.3063	-337.927	0.849698	II
16CO003	764.454	1158.53	1922.98	0.63154	II
16CO006	158.995	815.984	974.979	0.732981	I
16CO011	435.871	890.675	1326.55	0.696916	II
20CO001	1106.98	1051.34	2158.33	0.604383	II
20CO003	979.819	2064.5	3044.32	0.495959	II
20CO004	-1046.68	-641.653	-1688.33	0.936894	I
20CO007	-637.642	557.646	-79.9956	0.829131	I
21CO006	537.493	1100.12	1637.61	0.663455	II
21CO007	-275.22	130.388	-144.832	0.834414	I
22CO004	-836.916	531.426	-305.49	0.847178	I
22CO006	1346.83	2113.51	3460.34	0.442039	II
27CO004	393.043	653.126	1046.17	0.725832	II

## Sheet: Table S3c
TCGA.participant.ID	Leukocyte Fraction	Immune Subtype	OS	OS_time.x	Lymphocytes	Neutrophils	Eosinophils	Mast Cells	Dendritic Cells	Macrophages	Number of TIL Patches	number_of_clusters	til_percentage	NP_mean	NP_sd	WCD_mean	WCD_sd	CE_mean	CE_sd	Ball_Hall	Banfeld_Raftery	C_index	Det_Ratio	Ball_Hall_Adjusted	Banfeld_Raftery_Adjusted	C_index_Adjusted	Det_Ratio_Adjusted	Slide	Global_Pattern	Cluster
TCGA-A6-3807	0.227826	C1	0	1054	0.510779	0.0527585	0.0223036	0.0630631	0.0323641	0.318732	3388	11	5.29747	308	36.1718	353319	151140	64.9545	8.95593	1124	23678	0.013552	-284.229	242.458	7050.61	-0.00943677	-674.733	TCGA-A6-3807-01Z-00-DX1	Brisk Diffuse	II
TCGA-A6-3808	0.291841	C1	0	1014	0.448946	0.0202864	0.0337894	0.0970504	0.0215465	0.378382	1590	6	4.30941	265	97.5479	167810	40166.2	87.9099	4.98139	779.071	10065	0.0114221	-526.869	-145.017	-2616.61	-0.0120155	-847.826	TCGA-A6-3808-01Z-00-DX1	Non-Brisk Multifocal	II
TCGA-A6-3810	0.249372	C1	0	1111	0.373549	0.0289772	0.00469345	0.136053	0.00675724	0.44997	366	8	4.07572	45.75	18.5453	6222.79	3160.42	24.9616	7.76755	131.871	1782.59	0.038899	89.2094	-802.102	-10022.9	0.0153965	-215.59	TCGA-A6-3810-01Z-00-DX1	Brisk Diffuse	II
TCGA-AA-3518	0.138586	C1	0	31	0.559512	0.00949259	0	0.0669769	0	0.364019	3349	14	9.68087	239.214	111.243	65739.1	19926.8	38.5294	6.11951	317.518	18665.7	0.0185327	468.267	-375.767	-15349	-0.00286119	-229.932	TCGA-AA-3518-01Z-00-DX1	Brisk Band-like	II
TCGA-AA-3525	0.132143	C1	0	245	0.628503	0.0209906	0	0.0376916	0	0.312815	3260	15	11.4462	217.333	82.9343	52113.2	18133.2	30.8373	4.74256	253.434	17688.5	0.022883	577.675	-365.926	-23181.7	0.0021968	-241.353	TCGA-AA-3525-01Z-00-DX1	Brisk Diffuse	II
TCGA-AA-3526	0.134673	C2	0	580	0.461229	0.0138588	0.0302854	0.0560971	0.0108955	0.427634	628	7	3.38764	89.7143	34.7213	28664.3	7926.68	36.1897	6.09822	357.922	3594.35	0.0379296	56.3509	-605.708	-5471.9	0.0141326	-199.976	TCGA-AA-3526-01Z-00-DX1	Brisk Diffuse	I
TCGA-AA-3529	0.148325	C1	1	0	0.4829	0.00665159	0.00224053	0.193292	0.0109202	0.303995	916	8	1.8731	114.5	76.0489	85927.7	54728.7	68.0787	18.2692	759.149	6035	0.0259348	110.174	-269.81	3016.31	0.00155108	-39.3731	TCGA-AA-3529-01Z-00-DX1	Non-Brisk Multifocal	II
TCGA-AA-3531	0.0172712	C1	0	1035	0.485633	0	0.00373846	0.0621434	0.016942	0.431543	694	4	1.35022	173.5	33.2315	312551	101359	90.5858	13.8667	1785.33	5186.07	0.020051	72.1923	734.018	4232.02	-0.00444784	-40.8249	TCGA-AA-3531-01Z-00-DX1	Non-Brisk Multifocal	I
TCGA-AA-3534	0.0819727	C1	0	882	0.410213	0.00421287	0	0.0780622	0.0107456	0.496767	3356	12	23.4194	279.667	112.317	44838.1	20723.5	26.3157	3.6535	160.937	16907.7	0.0210374	280.079	57.3382	-71651.8	0.00488741	-1381.95	TCGA-AA-3534-01Z-00-DX1	Brisk Diffuse	II
TCGA-AA-3552	0.203232	C2	1	396	0.698875	0	0	0.015317	0.0320483	0.25376	5659	21	26.5257	269.476	65.2308	37733.1	11458.4	22.01	2.65319	140.016	27855.5	0.0219182	552.425	169.655	-72966.6	0.00697332	-1327.38	TCGA-AA-3552-01Z-00-DX1	Brisk Diffuse	II
TCGA-AA-3558	0.0690304	NA	0	638	NA	NA	NA	NA	NA	NA	187	5	0.541542	37.4	12.9345	30614.6	12606.3	51.7611	6.55665	817.533	1249.42	0.07283	27.6031	-268.503	3501.81	0.0479431	-28.6522	TCGA-AA-3558-01Z-00-DX1	Non-Brisk Multifocal	I
TCGA-AA-3561	0.0194562	C1	0	424	0.452907	0.0328557	0	0.0614546	0.0157622	0.437021	301	4	1.00834	75.25	11.5866	66991.5	44797.4	70.1912	21.701	841.996	2004.37	0.0373076	29.4337	-223.926	2392.67	0.0126221	-59.6985	TCGA-AA-3561-01Z-00-DX1	Non-Brisk Focal	I
TCGA-AA-3664	0.0643306	C2	0	1643	0.515501	0.00217868	0	0.070789	0	0.411531	297	5	0.989275	59.4	25.0659	56344.8	31363.2	58.0662	10.5188	938.484	2029.06	0.0733573	21.1791	-128.34	2506.09	0.0487141	-66.4779	TCGA-AA-3664-01Z-00-DX1	Non-Brisk Multifocal	I
TCGA-AA-3666	0.0777167	C1	1	61	0.423786	0.0211175	0	0.171302	0	0.383794	186	3	0.700539	62	75.5447	12879.9	9186.73	58.4234	10.2254	441.155	951.912	0.00476298	35.9371	-638.048	2572.18	-0.0200361	-31.4879	TCGA-AA-3666-01Z-00-DX1	Non-Brisk Focal	I
TCGA-AA-3684	0.274835	C1	0	0	0.557418	0.0282684	0	0.0344773	0.0216425	0.358194	17693	22	22.467	804.227	338.725	346828	119715	47.3065	14.9175	511.073	105819	0.0102667	4129.72	368.792	21023.5	-0.00615689	2530.92	TCGA-AA-3684-01Z-00-DX1	Brisk Band-like	II
TCGA-AA-3695	0.0557242	NA	0	0	NA	NA	NA	NA	NA	NA	1898	9	6.33448	210.889	54.6796	65244.1	24909.2	40.3123	8.24806	320.023	10776	0.0274945	167.616	-517.245	-9941.08	0.00485726	-295.245	TCGA-AA-3695-01Z-00-DX1	Non-Brisk Multifocal	I
TCGA-AA-3710	0.394034	C2	0	821	0.486459	0.0697782	0	0.146645	0.0244492	0.272669	524	8	1.59494	65.5	55.8186	29350.4	13292.8	47.0894	12.2574	569.157	3162.59	0.0262554	85.81	-471.836	1248.62	0.00184397	-44.0671	TCGA-AA-3710-01Z-00-DX1	Non-Brisk Multifocal	I
TCGA-AA-3715	0.335778	C2	1	579	0.431582	0.0305388	0	0.11286	0.00222011	0.4228	706	5	2.24826	141.2	127.211	64652.9	47870.2	61.3938	27.5226	577.788	4302.5	0.0245763	-53.6933	-434.839	-233.239	0.000396453	-229.935	TCGA-AA-3715-01Z-00-DX1	Non-Brisk Multifocal	II
TCGA-AA-3818	0.0783752	C1	1	30	0.523948	0.00214668	0	0.0271979	0.00562682	0.441081	2074	11	11.0879	188.545	89.3794	35318.9	21081.4	30.3653	8.42863	211.65	10549.2	0.036948	196.129	-420.603	-29189.9	0.016082	-601.824	TCGA-AA-3818-01Z-00-DX1	Brisk Diffuse	II
TCGA-AA-3848	0.0500103	C1	1	306	0.647809	0	0.000823377	0.012459	0.0185589	0.32035	1426	9	5.20115	158.444	40.1594	58562.7	15608	40.1034	5.83562	379.643	8397.16	0.0243946	219.769	-506.193	-7852.14	0.00132498	-163.711	TCGA-AA-3848-01Z-00-DX1	Brisk Diffuse	I
TCGA-AA-3864	0.144512	C1	0	1612	0.437295	0.0337783	0	0.0859023	0	0.443025	747	4	4.51441	186.75	145.55	29294.2	16648.4	51.2013	27.0661	248.009	3635.9	0.0868066	11.099	-667.483	-9871.11	0.063461	-323.908	TCGA-AA-3864-01Z-00-DX1	Non-Brisk Focal	I
TCGA-AA-3986	0.279285	C1	0	580	0.635543	0.0106974	0	0.0423215	0.00190394	0.309534	11157	17	25.0235	656.294	285.556	244443	116943	38.0561	6.6024	356.135	65886.3	0.0241177	468.484	321.304	-29007.8	0.00859949	-1305.94	TCGA-AA-3986-01Z-00-DX1	Brisk Diffuse	II
TCGA-AA-3989	0.172854	C1	1	242	0.508214	0	0	0.0655347	0.0214195	0.404831	2661	13	16.7201	204.692	51.9076	36238.6	10958.7	27.4548	4.06262	180.922	13682.2	0.0263822	302.386	-210.643	-48236	0.00772432	-888.966	TCGA-AA-3989-01Z-00-DX1	Brisk Diffuse	I
TCGA-AA-A004	0.225545	C4	0	424	0.735167	0	0	0.00914293	0	0.25569	1747	11	6.15314	158.818	63.9466	48801.6	22031.5	35.6319	5.36723	298.382	9945.98	0.0278243	157.609	-546.622	-10076	0.0050884	-292.608	TCGA-AA-A004-01Z-00-DX1	Brisk Diffuse	II
TCGA-AA-A00A	0.13839	C1	0	1157	0.490892	0.00169726	0	0.12131	0	0.386101	7833	15	29.1938	522.2	176.302	152348	45261	32.8025	5.02839	302.246	44174.5	0.0120633	775.261	447.931	-67392.4	-0.00179379	-1294.21	TCGA-AA-A00A-01Z-00-DX1	Brisk Diffuse	II
TCGA-AA-A00E	0.331153	C1	0	913	0.426548	0	0	0.0622865	0.0109107	0.500255	2016	14	8.44787	144	62.3378	26376.6	15054.9	28.8298	8.04203	177.964	10417.3	0.0226265	430.967	-568.186	-18762.8	0.00076827	-180.825	TCGA-AA-A00E-01Z-00-DX1	Brisk Diffuse	I
TCGA-AA-A00F	0.148157	C1	0	1035	0.549948	0	0	0.0646596	0.0289708	0.356422	200	3	3.51927	66.6667	16.6233	17773.1	4658.18	34.0624	4.37317	265.856	1117.06	0.0209155	36.4468	-692.186	-8458.33	-0.00281771	-229.013	TCGA-AA-A00F-01Z-00-DX1	Non-Brisk Multifocal	II
TCGA-AA-A00J	0.0716136	C1	0	549	0.314731	0.00778054	0	0.14363	0	0.533859	5166	13	6.65919	397.385	179.692	221636	48241	69.5893	23.7737	664.283	32125	0.0120559	1730.28	-158.802	10048	-0.0104165	1244.24	TCGA-AA-A00J-01Z-00-DX1	Brisk Diffuse	I
TCGA-AA-A00K	0.160292	C1	0	549	0.444047	0	0	0.124641	0	0.431311	2192	12	10.4133	182.667	56.3291	43473.9	10922.8	31.3141	3.10605	246.727	11953.5	0.0257353	233.193	-415.613	-24909.2	0.00461425	-515.585	TCGA-AA-A00K-01Z-00-DX1	Brisk Diffuse	II
TCGA-AA-A00N	0.31785	C1	1	122	0.292646	0.029207	0	0.172761	0.00362726	0.501759	1667	13	9.97427	128.231	32.2753	25210.4	12143.9	25.177	2.38946	187.368	8751.84	0.0275788	325.117	-493.453	-26451	0.00634975	-393.454	TCGA-AA-A00N-01Z-00-DX1	Brisk Diffuse	II
TCGA-AA-A00O	0.16227	C1	0	822	0.402352	0	0	0.0524625	0	0.545185	890	10	6.78768	89	26.9155	15804.8	3928.66	27.5671	4.44135	184.834	4590.26	0.031432	127.748	-632.663	-17978.4	0.00893324	-367.428	TCGA-AA-A00O-01Z-00-DX1	Brisk Diffuse	II
TCGA-AA-A00R	0.400546	C2	0	30	0.586928	0	0	0.046907	0.0173843	0.348781	400	5	2.6956	80	45.1442	23211	9911.08	42.944	9.60577	336.482	2256.13	0.0414257	50.6645	-656.803	-4060.87	0.0173686	-157.19	TCGA-AA-A00R-01Z-00-DX1	Non-Brisk Multifocal	I
TCGA-AA-A00U	0.135985	C1	0	518	0.706273	0	0	0.0414703	0	0.252257	3858	14	19.6416	275.571	104.751	47969.9	11141	27.539	3.56753	191.126	19742.3	0.0264824	410.758	-75.7965	-53756.3	0.00893372	-984.319	TCGA-AA-A00U-01Z-00-DX1	Brisk Diffuse	I
TCGA-AA-A010	0.14392	C1	0	1064	0.534752	0	0	0.072658	0	0.39259	12805	34	30.5769	376.618	71.5355	68182.8	17812	26.161	2.78818	181.754	66348.6	0.0176905	1781.92	387.612	-50853.9	0.00434178	-385.907	TCGA-AA-A010-01Z-00-DX1	Brisk Diffuse	II
TCGA-AA-A017	0.287799	C1	0	457	0.620956	0.0324661	0	0.0477312	0.0198989	0.278948	657	7	3.05439	93.8571	58.0127	41240.4	37309.5	46.752	13.6735	386.178	3911.48	0.0262535	90.9223	-592.065	-3801.25	0.00240249	-141.52	TCGA-AA-A017-01Z-00-DX1	Non-Brisk Multifocal	I
TCGA-AA-A01C	0.124313	C1	0	457	0.582322	0	0	0.00383842	0	0.413839	131	2	0.757751	65.5	54.4472	70843.4	72262.2	67.083	13.0284	951.924	913.019	0.105782	3.33473	-124.828	2306.74	0.0812257	-68.0945	TCGA-AA-A01C-01Z-00-DX1	Non-Brisk Focal	II
TCGA-AA-A01D	0.253387	C1	1	334	0.189047	0	0	0.0801669	0	0.730787	1696	7	7.50409	242.286	103.055	143913	64596.7	50.1105	8.03731	615.812	10747.1	0.0238265	197.69	-171.169	-14688.9	0.00160485	-347.364	TCGA-AA-A01D-01Z-00-DX1	Brisk Diffuse	II
TCGA-AA-A01F	0.0398857	C1	0	974	0.585269	0	0	0.132406	0	0.282325	91	3	0.867327	30.3333	9.86577	20131.3	10057	48.1626	1.74483	631.389	589.868	0.0761309	9.41012	-440.679	1550.74	0.0513674	-69.6764	TCGA-AA-A01F-01Z-00-DX1	Non-Brisk Focal	I
TCGA-AA-A01I	0.153761	C1	0	943	0.420454	0	0.016071	0.167074	0.0998478	0.296554	709	5	6.80553	141.8	52.2752	63511.1	26846.9	43.4209	9.04304	465.062	4294.75	0.00717082	202.881	-351.576	-18357.9	-0.0152891	-293.7	TCGA-AA-A01I-01Z-00-DX1	Non-Brisk Multifocal	I
TCGA-AA-A01K	0.279321	C1	0	943	0.411452	0	0	0.145214	0.00158591	0.441749	5858	18	35.4815	325.444	43.1662	43743	11276	21.8378	2.58975	133.595	28610.1	0.0223776	507.209	550.054	-108019	0.0109163	-2004.84	TCGA-AA-A01K-01Z-00-DX1	Brisk Diffuse	II
TCGA-AA-A01P	0.413161	C2	1	1158	0.609123	0.00548495	0	0.0194191	0	0.365973	2884	9	6.06545	320.444	170.03	225862	148728	54.8569	13.2969	620.662	18840.6	0.0244396	158.907	-227.781	-908.224	0.0016578	-285.689	TCGA-AA-A01P-01Z-00-DX1	Brisk Diffuse	II
TCGA-AA-A01R	0.291125	C2	0	1065	0.723929	0	0	0.0130657	0.0147248	0.24828	6202	13	11.5995	477.077	204.537	228887	80537.3	54.2918	21.2117	608.75	37637	0.0202555	255.652	-2.01303	-4076.2	-0.000326693	-577.426	TCGA-AA-A01R-01Z-00-DX1	Brisk Diffuse	I
TCGA-AA-A01S	0.036294	C1	0	31	0.532894	0	0	0.14992	0.00739866	0.309787	382	6	1.01623	63.6667	11.4134	30211.6	8406.32	56.9581	6.65821	481.771	2342.36	0.0341521	82.2322	-583.721	2692.95	0.00952592	-7.60251	TCGA-AA-A01S-01Z-00-DX1	Non-Brisk Focal	I
TCGA-AA-A01T	0.0451026	C1	0	1005	0.594889	0	0	0.11349	0.00903188	0.282589	28	2	0.154092	14	4.24264	12731.6	2369.34	48.9028	0.195202	926.287	190.66	0.0368531	-5.81994	-176.425	3984.14	0.0118946	-34.8183	TCGA-AA-A01T-01Z-00-DX1	Non-Brisk Focal	I
TCGA-AA-A01V	0.101368	C1	0	31	0.760214	0	0	0.0748081	0.00744051	0.157538	690	5	1.12385	138	55.9687	182134	66022.1	93.559	31.3549	1497.93	4877.24	0.0283551	59.5156	436.732	4835.7	0.00376417	-37.3442	TCGA-AA-A01V-01Z-00-DX1	Non-Brisk Multifocal	II
TCGA-AA-A01X	0.0870456	C1	0	791	0.685605	0	0	0.0295018	0.0494139	0.235479	1503	10	4.11353	150.3	44.9074	63068.5	26177.1	44.2136	8.72783	434.439	9003.72	0.0264089	287.795	-498.244	-2922.11	0.002908	-19.1118	TCGA-AA-A01X-01Z-00-DX1	Brisk Diffuse	I
TCGA-AA-A01Z	0.0523577	C1	0	1126	0.620321	0	0	0.194471	0.000840153	0.184368	14	2	0.0445789	7	2.82843	1693.31	994.066	34.4488	4.42343	232.163	76.7032	0	255.61	-875.251	4304.43	-0.0250472	234.297	TCGA-AA-A01Z-01Z-00-DX1	Non-Brisk Focal	I
TCGA-AA-A022	0.208279	C2	0	0	0.790563	0	0	0.0680145	0.00861917	0.132803	7237	14	29.4678	516.929	172.483	131723	43834.5	32.6054	3.9559	258.667	39880.5	0.0183529	522.795	417.247	-72884.1	0.00462097	-1567.76	TCGA-AA-A022-01Z-00-DX1	Brisk Diffuse	I
TCGA-AA-A024	0.118543	C3	1	1188	0.423089	0	0.0363376	0.260803	0.0180267	0.261744	152	4	0.44072	38	19.9666	32204.6	13537.5	68.3152	11.9882	992.733	1004.44	0.0078905	127.561	-97.6445	3653.03	-0.0170056	78.4009	TCGA-AA-A024-01Z-00-DX1	Non-Brisk Focal	II
TCGA-AA-A029	0.0555292	C1	0	1581	0.414017	0	0	0.191726	0.0118171	0.382441	1884	8	3.73891	235.5	172.979	136977	62543.7	65.1791	16.9895	884.32	11708	0.045093	48.1418	-64.2662	1247.72	0.0214665	-232.773	TCGA-AA-A029-01Z-00-DX1	Non-Brisk Multifocal	I
TCGA-AA-A02E	0.0751822	C1	1	90	0.543656	0	0.000275361	0.0662782	0.0240888	0.365701	2657	13	11.5758	204.385	105.311	47277.8	19129.9	34.4359	14.1102	315.584	14169.6	0.0166214	520.117	-295.179	-27476.2	-0.00402669	-312.961	TCGA-AA-A02E-01Z-00-DX1	Brisk Diffuse	II
TCGA-AA-A02H	0.0690967	C1	1	61	0.615192	0	0	0.0320976	0.0092448	0.343466	1234	8	4.93067	154.25	66.1357	45547.7	11927.4	39.1456	7.73672	329.532	6970.32	0.0385871	68.9339	-567.908	-8209.56	0.0154217	-295.578	TCGA-AA-A02H-01Z-00-DX1	Brisk Diffuse	I
TCGA-AA-A02J	0.0659596	C1	1	153	0.61097	0	0	0.188994	0.00995017	0.190086	244	4	1.11355	61	37.6563	40024.8	42591.7	44.5253	24.4745	551.659	1527.5	0.0184467	517.836	-509.965	1525.42	-0.00623966	421.679	TCGA-AA-A02J-01Z-00-DX1	Non-Brisk Multifocal	I
TCGA-AA-A02O	0.0684592	C1	0	28	0.658989	0	0	0.0724152	0.00839448	0.260201	25	2	0.0774138	12.5	6.36396	24429.8	16007.6	68.5737	6.26948	1870.86	189.282	0.0839505	3.66061	764.856	4286.43	0.0589653	-19.9566	TCGA-AA-A02O-01Z-00-DX1	Non-Brisk Focal	I
TCGA-AA-A02R	0.144991	C2	1	670	0.520759	0	0	0.0216252	0.0289034	0.428712	356	5	1.49895	71.2	68.3901	50599.8	65184.1	55.3125	28.0251	627.377	2265.78	0.0273414	76.2644	-417.485	716.142	0.00280954	-47.2903	TCGA-AA-A02R-01Z-00-DX1	Non-Brisk Multifocal	II
TCGA-AA-A02Y	0.101999	C1	0	1216	0.686494	0	0	0.0960791	0.0146192	0.202808	1080	9	5.5547	120	100.727	26012	15131.1	34.808	8.83638	259.049	5757.37	0.0189262	157.276	-611.743	-11882.5	-0.00404113	-250.791	TCGA-AA-A02Y-01Z-00-DX1	Brisk Diffuse	I
TCGA-AA-A03F	0.209806	C3	1	549	0.607647	0.00513204	0	0.246649	0.0455153	0.0950563	349	5	1.35587	69.8	58.5038	21941.2	8902.25	46.94	13.2211	560.897	1869.84	0.0256837	31.1518	-489.982	872.294	0.00115598	-82.5679	TCGA-AA-A03F-01Z-00-DX1	Non-Brisk Multifocal	II
TCGA-AA-A03J	0.24193	C1	0	1246	0.595899	0	0	0.0423176	0.0186241	0.34316	4485	14	8.22574	320.357	112.907	115551	37586.6	47.0451	15.7617	381.633	26155.9	0.027848	163.814	-373.973	-2088.84	0.00588411	-432.522	TCGA-AA-A03J-01Z-00-DX1	Brisk Diffuse	I
TCGA-AF-2691	0.12159	C1	0	1309	0.596248	0	0.0114218	0.0284899	0.00446804	0.359372	3551	7	11.1927	507.286	139.704	440318	328069	77.8575	38.9669	790.383	23727	0.0141333	247.402	221.235	-6109.77	-0.00632261	-281.138	TCGA-AF-2691-01Z-00-DX1	Brisk Diffuse	I
TCGA-AF-2692	0.0600046	C1	0	412	0.535125	0	0.0358869	0.161531	0.0270014	0.240456	11063	12	39.9357	921.917	158.143	327150	92479.5	52.5051	27.2257	352.54	64808	0.00958663	1023.73	1016.92	-79020.8	0.000146612	-1520.98	TCGA-AF-2692-01Z-00-DX1	Brisk Diffuse	I
TCGA-AF-3400	0.568565	C4	0	1049	0.120939	0.128111	0.0102688	0.316212	0.0226772	0.401793	3449	13	5.84249	265.308	120.253	118110	39402.1	54.2814	9.81031	553.225	20704	0.0175947	779.677	-246.296	12182.9	-0.00487308	627.676	TCGA-AF-3400-01Z-00-DX1	Brisk Band-like	II
TCGA-AG-3574	0.043335	C1	1	1096	0.483413	0.00462204	0	0.0585022	0.00273456	0.450728	557	6	3.17542	92.8333	53.3982	37974.4	25998.1	42.5899	9.6085	398.495	3314.85	0.0137135	154.741	-515.353	5359.75	-0.00979067	189.605	TCGA-AG-3574-01Z-00-DX1	Non-Brisk Multifocal	II
TCGA-AG-3580	0.200225	C1	0	244	0.543039	0.0221507	0	0.152452	0.0189193	0.26344	2846	11	7.19486	258.727	48.6212	155164	43496.4	48.447	10.1722	619.588	18038.6	0.0209453	303.019	-121.91	4119.99	-0.00105664	56.1813	TCGA-AG-3580-01Z-00-DX1	Brisk Diffuse	I
TCGA-AG-3584	0.0495307	C1	1	730	0.435875	0	0	0.120045	0.0125538	0.431526	2548	13	7.79419	196	93.1433	55579.3	22990.7	35.9304	5.65744	321.552	14075.3	0.0272375	344.971	-394.158	-2163.52	0.00547289	55.9835	TCGA-AG-3584-01Z-00-DX1	Brisk Diffuse	I
TCGA-AG-3593	0.0943586	C1	0	1035	0.522577	0	0	0.0658808	0.0263999	0.385143	11425	18	21.4792	634.722	205.554	286827	104346	41.3046	5.43805	456.283	69585.4	0.0131685	873.85	329.83	-1126.62	-0.00328233	-378.263	TCGA-AG-3593-01Z-00-DX1	Brisk Diffuse	I
TCGA-AG-3594	0.288494	C2	1	61	0.588448	0.0886711	0	0.000491715	0	0.322389	2491	8	13.116	311.375	216.452	131708	82868.8	37.6471	12.9921	397.219	14929.3	0.0358142	75.1759	-90.2666	-22457.5	0.0161042	-586.839	TCGA-AG-3594-01Z-00-DX1	Brisk Diffuse	I
TCGA-AG-4007	0.085003	C1	0	31	0.551166	0	0	0.00130973	0	0.447525	2531	14	13.9043	180.786	81.0661	28508.7	13522.4	30.7633	6.39515	159.47	12704.6	0.0256298	545.984	-293.631	-27835.5	0.00621028	-172.23	TCGA-AG-4007-01Z-00-DX1	Brisk Diffuse	I
TCGA-AG-A002	0.0716449	C1	0	638	0.393398	0.0143651	0	0.283894	0.0168501	0.291494	1114	10	4.54972	111.4	47.1857	34994.7	16344.2	38.504	5.86377	331.847	6303.79	0.0269014	162.299	-523.118	2907.41	0.00393343	100.92	TCGA-AG-A002-01Z-00-DX1	Brisk Diffuse	I
TCGA-AG-A008	0.00882538	C1	0	424	0.639223	0	0	0.102556	0.0151212	0.243099	1885	10	6.13487	188.5	73.5969	61873.1	17980.7	43.6398	5.76102	366.425	10761.6	0.0352425	170.939	-420.632	1130.85	0.0128379	-1.43373	TCGA-AG-A008-01Z-00-DX1	Brisk Diffuse	I
TCGA-AG-A00C	0.1336	C1	0	183	0.656054	0	0	0.0146393	0	0.329307	2502	15	12.3184	166.8	56.2383	24865.4	9841.49	24.9046	3.15534	151.406	12421	0.0164776	528.406	-370.464	-21779.5	-0.0035018	-77.4091	TCGA-AG-A00C-01Z-00-DX1	Brisk Diffuse	I
TCGA-AG-A00Y	0.167939	C2	0	700	0.531542	0	0	0.0847653	0	0.383693	3725	15	19.8423	248.333	52.1449	38627.5	10208.2	26.3135	5.73856	160.563	18663.6	0.0236322	609.574	-38.9561	-45273.3	0.00646733	-523.115	TCGA-AG-A00Y-01Z-00-DX1	Brisk Diffuse	I
TCGA-AG-A011	0.15221	C1	0	1126	0.616304	0	0	0.0349676	0.0185614	0.330167	3557	9	22.1248	395.222	272.03	107393	71807	29.3988	11.8341	225.629	19763.4	0.0235659	149.297	124.964	-53310.1	0.0073472	-1144.97	TCGA-AG-A011-01Z-00-DX1	Brisk Diffuse	I
TCGA-AG-A015	0.0392213	C1	0	1096	0.492343	0	0	0.135194	0.082986	0.289478	2921	16	9.23724	182.562	85.6847	53503.6	24678.2	31.794	3.35948	301.349	16539.2	0.027659	276.709	-352.039	-5523.66	0.00652759	-114.141	TCGA-AG-A015-01Z-00-DX1	Indeterminate	II
TCGA-AG-A016	0.0141208	C1	0	276	0.567401	0	0	0.0401531	0	0.392446	1084	6	5.30618	180.667	75.4948	103471	42824.1	49.6498	9.99386	570.814	6881.26	0.0202872	153.725	-251.486	468.305	-0.00237583	38.9568	TCGA-AG-A016-01Z-00-DX1	Brisk Diffuse	I
TCGA-AG-A01J	0.133288	C1	0	31	0.722625	0	0	0.00702192	0	0.270353	1113	8	10.5919	139.125	37.7035	18262.3	9325.21	24.9033	7.21725	132.163	5327.55	0.0282474	141.873	-462.773	-22096.3	0.00754786	-344.517	TCGA-AG-A01J-01Z-00-DX1	Brisk Diffuse	II
TCGA-AG-A01L	0.0547009	C1	0	0	0.657893	0	0	0.0739084	0.00572192	0.262477	883	3	11.354	294.333	174.277	132229	92521.1	39.4778	3.57061	410.538	5384.47	0.0283215	97.9167	-150.014	-25224.3	0.0079539	-444.673	TCGA-AG-A01L-01Z-00-DX1	Brisk Diffuse	I
TCGA-AG-A01N	0.125127	C1	0	943	0.299841	0.0266439	0	0.0901954	0	0.58332	2457	7	17.2967	351	90.2921	106661	46355.1	33.785	5.55333	289.593	13943.9	0.0193251	308.185	-17.377	-40142.1	0.00121096	-648.879	TCGA-AG-A01N-01Z-00-DX1	Brisk Diffuse	I
TCGA-AG-A01W	0.187137	C2	0	0	0.623971	0	0	0.0028916	0.0366679	0.336469	7898	23	14.9748	343.391	151.637	84067	32091	35.9583	5.85815	259.682	43250.9	0.0157026	1437.55	-146.142	-1605.31	-0.00326891	642.057	TCGA-AG-A01W-01Z-00-DX1	Brisk Band-like	I
TCGA-AG-A01Y	0.139867	C1	0	0	0.455517	0	0	0.0866253	0.00872843	0.449129	2099	7	7.2844	299.857	213.598	161246	93347.9	63.3635	36.9312	690.968	12963.5	0.0319528	142.526	-46.6612	-1237.54	0.0100778	-110.635	TCGA-AG-A01Y-01Z-00-DX1	Brisk Band-like	II
TCGA-AG-A020	0.0738847	C1	0	31	0.617048	0	0.00701009	0.113172	0.00805545	0.254714	947	8	4.72626	118.375	61.1928	30971.2	8379.81	37.7669	10.0022	327.393	5190.39	0.043178	85.6177	-519.836	1082.36	0.0203023	11.5942	TCGA-AG-A020-01Z-00-DX1	Non-Brisk Focal	I
TCGA-AG-A026	0.0373614	C1	1	59	0.61269	0	0.000728565	0.0463295	0	0.340252	302	4	1.94588	75.5	27.8747	53955.8	30093.1	82.1659	11.5337	667.987	1976.42	0.00156509	2783.48	-298.726	8915.94	-0.0223912	2904.76	TCGA-AG-A026-01Z-00-DX1	Non-Brisk Multifocal	I
TCGA-AG-A02N	0.10814	C1	0	1885	0.641014	0	0	0.0744984	0.00905317	0.275435	1015	8	4.06569	126.875	87.5907	34687.3	28682.1	41.937	15.1955	271.394	5619.99	0.0298162	121.656	-604.201	4134.22	0.0066498	93.9978	TCGA-AG-A02N-01Z-00-DX1	Non-Brisk Multifocal	I
TCGA-AG-A02X	0.0263475	C1	0	1247	0.598215	0	0	0.0381063	0	0.363679	1268	10	11.2821	126.8	30.3601	18692.8	9812.87	25.6136	4.56361	144.944	6251.28	0.02196	278.377	-419.906	-23957	0.00161565	-257.188	TCGA-AG-A02X-01Z-00-DX1	Brisk Diffuse	I
TCGA-AG-A032	0.0723616	C1	0	1157	0.744051	0	0	0.00277227	0.00900047	0.244176	3734	8	18.9495	466.75	183.58	191918	112514	37.5279	9.42823	365.358	22217.1	0.0279307	162.828	127.157	-38198.1	0.010423	-906.636	TCGA-AG-A032-01Z-00-DX1	Brisk Diffuse	I
TCGA-AG-A036	0.131632	C1	0	3562	0.506426	0	0	0.0686431	0	0.424931	2158	9	17.9863	239.778	55.215	38087.3	11500.7	24.6801	4.93768	159.943	10887.3	0.0236345	207.833	-116.941	-45922.8	0.00577874	-798.406	TCGA-AG-A036-01Z-00-DX1	Brisk Diffuse	I

## Sheet: Table S3d
Sample1	B cells naive	B cells memory	Plasma cells	T cells CD8	T cells CD4 naive	T cells CD4 memory resting	T cells CD4 memory activated	T cells follicular helper	T cells regulatory (Tregs)	T cells gamma delta	NK cells resting	NK cells activated	Monocytes	Macrophages M0	Macrophages M1	Macrophages M2	Dendritic cells resting	Dendritic cells activated	Mast cells resting	Mast cells activated	Eosinophils	Neutrophils	P-value	Correlation	RMSE	Cluster
TCGA.A6.3807.01	0.0227036	0	0.00125878	0.109125	0	0.0989655	0.0520568	0.122647	0	0	0.0200621	0.00270613	0	0.110444	0.0754942	0.283604	0	0	0.000696586	0.00135982	0.00505635	0.0938207	0.77	0.00195847	1.09819	II
TCGA.A6.3808.01	0.0108646	0	0.0133628	0.043281	0	0.151621	0	0.0348423	0.0177501	0	0.00168872	0.0120662	0.0412288	0.130328	0.0497705	0.248793	0.00227716	0	0	0.209988	0	0.0321366	0	0.369672	0.937088	II
TCGA.A6.3810.01	0.0238667	0	0.0442692	0.0637371	0	0.0744717	0.000837201	0.0733617	0	0	0	0.0253104	0	0.155407	0.0671532	0.270673	0.00489244	0	0	0.146602	0	0.0494189	0	0.311907	0.964036	II
TCGA.AA.3518.01	0.0116093	0	0.0708207	0.12836	0	0.134826	0.00441248	0.0798986	0.0266891	0	0.0265841	0.0238647	0.00251943	0.151111	0.0561251	0.187909	0	0	0	0.065691	0	0.0295789	0	0.242677	0.988539	II
TCGA.AA.3525.01	0.0487193	0	0.103386	0.0677561	0	0.201369	0	0.0291445	0	0	0.0187283	0.0033775	0	0.162329	0.0677093	0.190441	0	0	0	0.0793305	0	0.0277093	0.03	0.158265	1.02183	II
TCGA.AA.3529.01	0.0215664	0	0.0807507	0.0582024	0	0.116852	0	0.0291689	0.0386674	0	0.0184191	0	0.0167807	0.0609823	0.0174981	0.32848	0	0	0.087588	0.0906687	0	0.0343755	0.04	0.142274	1.02928	II
TCGA.AA.3531.01	0	0	0.100246	0.162033	0	0.0765123	0	0.00117936	0.058227	0	0.0749005	0	0.0123554	0.155415	0.0738369	0.215587	0.00100911	0	0	0.0686992	0	0	0.7	0.0131733	1.08716	I
TCGA.AA.3534.01	0.0145987	0	0.0439257	0.0602866	0	0.210775	0.0291832	0.055526	0.0144947	0	0.0468665	0	0	0.121968	0.0313349	0.276541	0	0	0	0.0944994	0	0	0.2	0.0826636	1.05912	II
TCGA.AA.3552.01	0.00475265	0	0.173525	0.116478	0	0.176603	0	0.0380213	0.0918501	0	0	0.033539	0.0234822	0.0246016	0.0616662	0.250856	0	0.00151966	0.00103013	0.00207437	0	0	0.01	0.212892	0.995414	II
TCGA.AA.3554.01	0	0.0115457	0	0.0370261	0	0.0689072	0	0.0287068	0.0365809	0	0.0142493	0.0092791	0	0.358211	0.0206872	0.141865	0	0	0	0.237031	0.000176672	0.0357337	0	0.390891	0.94329	II
TCGA.AA.3561.01	0.00462181	0	0.024831	0.0363018	0	0.21403	0.0909743	0.0184464	0	0	0.0362331	0	0.0126889	0	0.0711594	0.336356	0	0	0	0.115345	0	0.0390132	0.2	0.0824761	1.05812	I
TCGA.AA.3664.01	0.0375451	0	0.0444431	0.060725	0	0.204812	0	0.134567	0	0	0	0.0407368	0	0.097556	0.0850334	0.214403	0	0	0	0.0635746	0	0.0166031	0.47	0.0463262	1.07338	I
TCGA.AA.3666.01	0.014793	0	0.0537815	0.0150947	0	0.167981	0.0400449	0.0884904	0	0	0.00655917	0.00202081	0.00158252	0.0531624	0.0958592	0.267332	0.000445132	0	0	0.146077	0	0.0467767	0.01	0.200872	1.00895	I
TCGA.AA.3672.01	0.0115161	0	0	0.324878	0	0	0.047603	0.045945	0.0419759	0	0.0213594	0.107323	0	0.0804849	0.114628	0.101283	0.0158832	0	0	0.0611262	0	0.0259935	0	0.281583	0.993436	I
TCGA.AA.3684.01	0.00456594	0.0198855	0	0.0566958	0	0.0615257	0	0.0311961	0.138494	0	0.0532568	0	0	0.182066	0.0634224	0.196782	0.0225486	0	0	0.147794	0	0.0217658	0	0.297155	0.970127	II
TCGA.AA.3710.01	5.56944e-05	0	0.00455483	0.193063	0	0.00998802	0.0828384	0.0910335	0.00534277	0	0.0176863	0.0183679	0	0.0771243	0.139216	0.199757	0	0	0	0.0769387	0	0.084033	0	0.447551	0.894255	I
TCGA.AA.3715.01	0.0425165	0	0	0.0574656	0	0.093082	0.0149082	0.0347554	0.0565252	0	0.068378	0.00671786	0	0.282103	0.0636737	0.143753	0	0	0	0.123569	0	0.0125521	0	0.407023	0.917195	II
TCGA.AA.3818.01	0	0.00647873	0.0350174	0.165476	0	0.111363	0	0.0700753	0.0607607	0	0.0229383	0.0175924	0.0521065	0.100572	0.0159026	0.183988	0.0197546	0.0108042	0	0.119813	0.00735691	0	0.33	0.0657147	1.06483	II
TCGA.AA.3848.01	0	0.00226383	0.0316679	0.137599	0	0.101764	0	0.0246085	0.13291	0	0.0827657	0.00250215	0.0465679	0.0907269	0.0482925	0.19851	0.00903002	0	0	0.0907925	0	0	0.54	0.0317622	1.07966	I
TCGA.AA.3864.01	0.0288937	0	0.0339011	0.0731455	0	0.177114	0	0.0798727	0	0	0.0050636	0.0272743	0	0.138346	0.0576381	0.268463	0	0	0	0.0654616	0	0.0448268	0.08	0.124609	1.04355	I
TCGA.AA.3986.01	0.0048939	0.00794581	0.109421	0.12414	0	0.248928	0	0.0228929	0.0739138	0	0.0118908	0.0035632	0.0114979	0.0479355	0.115211	0.173208	0.00236642	0	0	0.0333015	0	0.00888915	0	0.235671	0.992183	II
TCGA.AA.3989.01	0.026685	0	0.181315	0.153133	0	0.166211	0.00860155	0.0246526	0.036885	0	0	0	0.00779252	0.0212573	0.0747161	0.228379	0.000492662	0	0	0.05843	0	0.0114495	0.07	0.133059	1.02371	I
TCGA.AA.A004.01	0.125369	0	0	0.125066	0	0.205821	0	0.0043356	0.187125	0	0.0969576	0.0354972	0	0.111496	0.0279138	0.0383332	0	0	0	0.0420857	0	0	0.02	0.180751	1.03589	II
TCGA.AA.A00A.01	0.0415045	0	0.0213987	0.100017	0	0.0913539	0.00645569	0.112153	0.037324	0	0.0111573	0.0393631	0	0.100809	0.0910316	0.171492	0	0	0	0.16813	0	0.00780985	0.03	0.156904	1.03549	II
TCGA.AA.A00E.01	0.060354	0	0.00344106	0.0597502	0	0.115777	0.00951458	0.0837642	0.0375187	0	0.00157623	0.030997	0	0.179353	0.0892431	0.229092	0.00865409	0	0	0.080376	0	0.0105886	0	0.289767	0.972191	I
TCGA.AA.A00F.01	0	0.0171226	0.0864349	0.0604005	0	0.194282	0	0.150329	0.0213697	0	0	0.0852094	0.0142963	0.0855183	0.0133672	0.190824	0	0.0225695	0.0344133	0.0204184	0	0.0034448	0.34	0.0631387	1.06161	II
TCGA.AA.A00J.01	0.0174248	0	0.034822	0.059117	0	0.13541	0.016967	0.0500195	0.0149385	0	0.0158867	0.0234187	0	0.190573	0.0475147	0.270219	0.00621225	0	0	0.0830427	0	0.034433	0.02	0.179638	1.02437	I
TCGA.AA.A00K.01	0	0.0225194	0.0676692	0.0779909	0	0.141387	0.0647718	0.067063	0.070294	0	0.0315062	0	0.00294193	0.23308	0.0113459	0.157518	0	0	0	0.0519128	0	0	0.17	0.0878866	1.05686	II
TCGA.AA.A00N.01	0.00787712	0	0.0112758	0.027399	0	0.0490605	0	0.0380732	0.0233403	0	0	0.0320597	0.00628636	0.43371	0.0353503	0.208912	0	0	0	0.10837	0	0.0182854	0	0.402103	0.938483	II
TCGA.AA.A00O.01	0.0300499	0	0.00852083	0.0286291	0	0.0819754	0	0.0182783	0.0702486	0	0.051273	0	0	0.397964	0.0419586	0.202564	0	0	0	0.0685384	0	0	0.1	0.1102	1.09038	II
TCGA.AA.A00R.01	0.0226856	0	0	0.236359	0	0.0223073	0.130752	0.0995676	0.0162778	0	0.0147607	0.0758815	0	0.100867	0.12871	0.098384	0.0146424	0	0	0.0343417	0	0.00446242	0	0.49054	0.870771	I
TCGA.AA.A00U.01	0	0	0.0274642	0.134207	0	0.242727	0.0292122	0.184187	0.0758169	0	0.0218497	0.0136514	0.021722	0.0137844	0.0240473	0.126156	0.00215175	0.0203528	0	0.0626708	0	0	0.44	0.0499454	1.09074	I
TCGA.AA.A010.01	0.0789104	0	0.0234947	0.117663	0	0.0930633	0	0.119412	0.0528596	0	0	0.076256	0	0.0832273	0.0927805	0.219556	0	0	0	0.032225	0	0.0105527	0.02	0.187187	1.01714	II
TCGA.AA.A017.01	0	0	0.0845406	0.0509503	0	0.152391	0	0.0539013	0.0958355	0	0.0562967	0.00955983	0	0.170612	0.0119978	0.138036	0	0.00562803	0	0.138802	0	0.0314487	0.33	0.0661854	1.06569	I
TCGA.AA.A01C.01	0	0.00827594	0.0417555	0.0409934	0	0.182545	0	0.0983948	0	0	0	0.0711032	0.00255333	0.0928373	0.0942623	0.351936	0.00325323	0	0.00250872	0.0095812	0	0	0.12	0.103344	1.05926	II
TCGA.AA.A01D.01	0.000411966	0.0125485	0	0.00412939	0	0.0840223	0	0.0260086	0.0540481	0	0.0268273	0.000594599	0	0.517959	0.00317217	0.163372	0	0	0	0.106905	0	0	0	0.489961	0.885798	II
TCGA.AA.A01F.01	0	0.00814776	0.0128681	0.063686	0	0.371124	0.0412324	0.0286902	0.00825472	0	0.0010837	0.129493	0.0232887	0.105945	0.00373817	0.139678	0.000754869	0.0227615	0	0.0392535	0	0	0.79	-0.000590461	1.1195	I
TCGA.AA.A01I.01	0	0	0.0426802	0.113567	0	0.103832	0.0723801	0.149519	0	0.0366617	0	0	0	0.0455245	0.146502	0.198495	0.00968045	0	0	0.0786511	0	0.00250637	0.39	0.0569057	1.07671	I
TCGA.AA.A01K.01	0	0.00848397	0.0397205	0.107737	0	0.0863632	0	0.0725326	0.0725253	0	0	0.0664535	0	0.265791	0.0570131	0.187341	0	0	0.0356069	0	0	0.000431478	0.03	0.151442	1.03985	II
TCGA.AA.A01P.01	0.00697551	0	0.0534102	0.211393	0	0.0145922	0.0876459	0.0580614	0.0243661	0	0	0.0856223	0	0.0762251	0.105274	0.223946	0	0	0	0.025785	0	0.0267027	0	0.248559	0.991962	II
TCGA.AA.A01R.01	0	0.0106515	0	0.255786	0	0	0	0.155505	0.0986647	0	0	0.119241	0	0.164717	0.0539412	0.11922	0.00102262	0	0	0.0212507	0	0	0	0.377024	0.937175	I
TCGA.AA.A01S.01	0	0.0084195	0.141063	0.15412	0	0	0	0.143953	0.119854	0	0.0304996	0	0	0.141626	0.00857621	0.109064	0.00361182	0	0	0.139214	0	0	0.89	-0.0236372	1.09599	I
TCGA.AA.A01T.01	0	0	0.0437583	0.1581	0	0.0738279	0	0.0825015	0.148522	0	0.0360451	0.0433767	0.0217003	0.0964894	0.0789472	0.0779349	0	0.00709168	0	0.131705	0	0	0.79	-0.00107377	1.10681	I
TCGA.AA.A01V.01	0.00244107	0	0.0471426	0.134142	0	0.0729749	0.0714683	0.127561	0.146393	0	0.0428965	0.00954734	0.0194097	0.128064	0.0123696	0.00677302	0.00752568	0	0	0.171291	0	0	0.12	0.104724	1.062	II
TCGA.AA.A01X.01	0.202483	0	0	0.0705009	0	0.19809	0	0.0507267	0.128675	0	0.067691	0	0.0308985	0.0941135	0.0209369	0.0683051	0.010731	0	0	0.0568485	0	0	0.33	0.0647654	1.0701	I
TCGA.AA.A01Z.01	0	0	0	0.137502	0	0.202345	0	0.132017	0.0442165	0	0.0510319	0	0.0153153	0.0546332	0.00754391	0.0865319	0	0	0	0.268863	0	0	0.48	0.0453872	1.11293	I
TCGA.AA.A022.01	0	0	0.0596905	0.401689	0	0	0.115461	0.101949	0.0307246	0	0	0.0727652	0.0101965	0.00808294	0.0679294	0.108512	5.42179e-05	0	0	0.0146265	0	0.00831821	0	0.27301	0.994967	I
TCGA.AA.A024.01	0.015809	0	0.137258	0.123348	0	0.112283	0	0.0838081	0.0877738	0	0.0698511	0	0	0.135264	0	0	0.00373283	0.00441084	0	0.222187	0.00427477	0	0.54	0.0308359	1.09282	II
TCGA.AA.A029.01	0	0	0.0412619	0.0875127	0	0.204939	0	0.0358349	0.0964078	0	0	0.0810508	0	0.169156	0.0180456	0.190759	0	0	0.0120438	0.0629889	0	0	0.54	0.0313304	1.09042	I
TCGA.AA.A02E.01	0.0261175	0	0.0846631	0.119069	0	0.0446666	0	0.163629	0.0402151	0	0.0113339	0	0.0107415	0.13532	0.0148579	0.201699	0.0213746	0.013976	0	0.106551	0.00578636	0	0.63	0.0239895	1.0751	II
TCGA.AA.A02H.01	0.00257436	0	0.167568	0.138157	0	0.236044	0	0.0990099	0	0	0	0.0389931	0.00325799	0.0436635	0.028895	0.238478	0	0	0.00208591	0	0	0.00127285	0.48	0.0455304	1.06828	I
TCGA.AA.A02J.01	0	0	0.181026	0.0251918	0	0.23844	0.0266076	0.0986458	0.0162319	0	0.026408	0.00443472	0.00194961	0.165178	0.040717	0.0760527	0	0.00730219	0	0.0918154	0	0	0.7	0.0140955	1.07247	I
TCGA.AA.A02O.01	0	0.0136772	0.0125366	0.207884	0	0.146717	0.040171	0.104812	0.103412	0	0.0181398	0	0.018503	0.07895	0.0140514	0.136092	0.0123178	0	0	0.0927366	0	0	0.4	0.0544805	1.08025	I
TCGA.AA.A02R.01	0.00413978	0	0	0.189014	0	0.0293971	0.144705	0.0867726	0	0	0	0.07226	0	0.0619199	0.183367	0.209925	0.00955876	0	0.00894145	0	0	0	0	0.370274	0.939938	II
TCGA.AA.A03F.01	0	0.0115069	0.133032	0.114359	0	0.170758	0	0.0141498	0.144515	0	0.0418411	0.0180092	0.0191987	0.188319	0.00150465	0.076043	0	0	0	0.0667632	0	0	0.4	0.0558184	1.06698	II
TCGA.AA.A03J.01	0.0113941	0	0	0.178421	0	0	0.0686225	0.0583035	0.0848613	0	0.0323961	0.0511011	0.000326484	0.119335	0.0544375	0.192746	0.0222881	0	0	0.125767	0	0	0.02	0.183798	1.02392	I
TCGA.AF.2691.01	0.0288776	0	0.0653318	0.150881	0	0.13471	0	0.0732943	0.0479763	0	0.0253471	0.0282956	0.00654589	0.0736241	0.0364681	0.292622	0	0	0	0.0353023	0	0.000723513	0.03	0.152206	1.02807	I
TCGA.AF.2692.01	0.0255716	0	0.0505361	0.0676727	0	0.137602	0.0100979	0.0646908	0.0440055	0	0.0733409	0	0.00996327	0.0659754	0.00113065	0.237143	0	0.0227297	0	0.151308	0.030416	0.00781707	0.54	0.0311792	1.07646	I
TCGA.AF.3400.01	0	0	0	0.000404336	0	0.100189	0	0.00233325	0	0	0.0242748	0	0.0529878	0.125539	0.00839831	0.199326	0	0.0215067	0	0.310904	0.00798957	0.146148	0	0.43329	0.916076	II
TCGA.AF.3913.01	0.0135799	0	0.0178435	0.0313667	0	0.193035	0.0206792	0.0236831	0.031949	0	0.0340051	0	0.0270793	0.0916879	0.0173665	0.344753	0	0.00976833	0	0.105949	0	0.0372541	0.14	0.0910072	1.06014	II
TCGA.AG.3574.01	0	0.0126352	0.021436	0.0915462	0	0.127169	0.0975575	0.0172339	0.0156632	0	0.0512365	0.0207242	0.0676612	0.0656697	0	0.334745	0.0060725	0	0	0.0706492	0	0	0.14	0.0926889	1.05512	II
TCGA.AG.3580.01	0.0333602	0	0.0577115	0.0926204	0	0.151452	0.0614716	0.106206	0.016531	0	0.0152405	0.00668698	0	0.122613	0.0200918	0.131711	0	0.0187415	0	0.134202	0	0.0313609	0.07	0.127421	1.03545	I
TCGA.AG.3584.01	0	0.00216801	0.0743033	0.0508264	0	0.073611	0	0.0524216	0.091096	0	0	0.0493156	0	0.278205	0.0219767	0.278281	0	0	0	0.0262799	0	0.00151521	0	0.242728	1.00237	I
TCGA.AG.3593.01	0.0404618	0	0.0679242	0.0530059	0	0.226051	0.0248278	0.0791662	0.0193264	0	0.0280019	0	0.00259597	0	0.0450174	0.31181	0.013511	0.00102331	0	0.064564	0	0.0227122	0.13	0.093653	1.04486	I
TCGA.AG.3594.01	0.0144921	0	0	0.242422	0	0.103482	0.0343128	0.120091	0.00823802	0	0.0330203	0.0362676	0.00688008	0	0.103738	0.171823	0	0.00163437	0	0.0389345	0	0.0846649	0.01	0.20455	1.01948	I
TCGA.AG.4007.01	0	0	0.200544	0.158058	0	0.0806112	0	0.0223609	0.0546517	0	0.000788944	0.00552178	0	0.0307895	0.03922	0.376458	0.00332741	0	0	0.020825	0	0.00684306	0.2	0.0819919	1.04794	I
TCGA.AG.A002.01	0.140576	0	0	0.0829629	0	0.100068	0	0.0357652	0.109604	0	0	0.0497548	0.00098169	0.0383604	0.0395198	0.26042	0	0.000893258	0	0.124732	0	0.0163624	0.74	0.00950749	1.09048	I
TCGA.AG.A008.01	0.000860124	0	0	0.0272747	0	0.440872	0	0.00141188	0.043753	0	0.0120993	0.0817538	0.00983073	0.0630573	0	0.168053	0	0	0	0.151034	0	0	0.49	0.0441286	1.10395	I
TCGA.AG.A00C.01	0	0.0308338	0.0607231	0.17454	0	0.23428	0	0.122159	0.0785434	0	0	0.0628169	0.0204673	0.0536726	0.00724469	0.078654	0.0269246	0.0327634	0	0.0163778	0	0	0.59	0.0256887	1.10063	I
TCGA.AG.A00H.01	0.019347	0	0.0259245	0.0806123	0	0.0979034	0	0.0061844	0.0830784	0	0.029772	0	0	0.35477	0.0202949	0.2165	0	0	0	0.0656129	0	0	0.04	0.14288	1.06318	I
TCGA.AG.A00Y.01	0.00528637	0.0278055	0.0720162	0.0747697	0	0.105907	0	0.119116	0.102393	0	0.0451599	0.0316738	0.0408329	0.120889	0.0954384	0.0928182	0	0.035067	0	0.0308267	0	0	0.19	0.0841741	1.05516	I
TCGA.AG.A011.01	0.0410064	0	0.130778	0.103443	0	0.17526	0	0.0826851	0.0767615	0	0	0.0660133	0.0143991	0.0621751	0.0309874	0.162214	0	0	0	0.0542768	0	0	0.76	0.00588624	1.08114	I
TCGA.AG.A014.01	0.0543346	0	0.0847815	0.0222985	0	0.0882398	0	0.080295	0.0760046	0	0	0.0549602	0.00316542	0.167772	0.066885	0.175845	0	0	0	0.10472	0	0.0206978	0.53	0.0335436	1.07622	I
TCGA.AG.A015.01	0	0.0205137	0.0436676	0.0206095	0	0.256903	0	0.0302539	0.0599498	0	0.0607319	0	0.0158191	0.195218	0	0.114468	0.000382787	0.0704459	0	0.111036	0	0	0.61	0.0250538	1.08411	II
TCGA.AG.A016.01	0.0026042	0	0.0845417	0.0547992	0	0.117076	0	0.0823006	0.0298903	0	0.0315716	0.0695155	0.0259875	0.0876048	0.0126039	0.30292	0	0	0	0.098585	0	0	0.86	-0.017463	1.10157	I
TCGA.AG.A01J.01	0.0347432	0	0	0.183383	0	0.0939846	0.0415357	0.0301526	0.0388142	0	0.118468	0	0	0.194818	0.0460339	0.117927	0.00911406	0	0	0.0910255	0	0	0.39	0.0574464	1.08401	II
TCGA.AG.A01L.01	0.0230987	0	0.0317883	0.116482	0	0.248721	0	0.0245014	0.0760194	0	0	0.072351	0.00658657	0.108832	0.0364596	0.195024	0	0	0.0601367	0	0	0	0.52	0.0382154	1.08073	I
TCGA.AG.A01N.01	0.0211701	0	0.0562405	0.0566147	0	0.035944	0	0.0337127	0.0655723	0	0.0173458	0.0165988	0	0.436573	0.00845137	0.187692	0	0	0	0.0491309	0	0.014954	0.09	0.116657	1.09228	I
TCGA.AG.A01W.01	0.0726711	0	0	0.161559	0	0.107135	0	0.134517	0.0270087	0	0.0156129	0	0.0278298	0.194979	0.0831897	0.0798414	0.0044716	0	0	0.0911844	0	0	0.41	0.0534112	1.07826	I
TCGA.AG.A01Y.01	0	0.0126676	0.0944403	0.0860976	0	0.0937653	0	0.0686307	0.0328815	0	0	0.0428829	0	0.365644	0.0473548	0.117333	0	0	0	0.0383016	0	0	0	0.218787	1.01557	II
TCGA.AG.A020.01	0.013215	0	0.0905961	0.136072	0	0.144041	0.0518404	0.0936614	0.0150518	0	0.118796	0	0	0.0653389	0.0253256	0.156522	0	0.00694994	0	0.0825901	0	0	0.55	0.0291113	1.07963	I
TCGA.AG.A026.01	0	0	0.0686322	0.0924951	0	0.145726	0	0.174565	0	0	0	0.0452307	0.00713385	0.0575259	0.0430181	0.322561	0	0	0	0.043112	0	0	0.69	0.0152667	1.08685	I
TCGA.AG.A02N.01	0	0	0.061539	0.142815	0	0.178859	0	0.126058	0	0.0222476	0	0.0575676	0	0.00925364	0.129086	0.213476	0	0	0.0506624	0.00843627	0	0	0.12	0.102258	1.05972	I
TCGA.AG.A02X.01	0.0402608	0	0.0421057	0.0585676	0	0.205635	0	0.0603882	0.0807238	0	0.0709879	0	0	0.132615	0.0199756	0.182696	0	0.00375509	0	0.102289	0	0	0.5	0.0428443	1.07443	I
TCGA.AG.A032.01	0.0159832	0.00835341	0.0655219	0.0609253	0	0.2435	0	0.119086	0.0536538	0	0.0455124	0	0	0.073572	0.0221421	0.164678	0	0.0186344	0	0.108437	0	0	0.4	0.0557119	1.0673	I
TCGA.AG.A036.01	0.0368476	0	0.0351251	0.108242	0	0.134796	0	0.0738362	0.0462981	0	0.0625067	0	0	0.242275	0.0562629	0.140664	0	0	0	0.0631465	0	0	0.09	0.114372	1.05228	I

## Sheet: Table S3e
Sample1	Adipocytes	Astrocytes	B-cells	Basophils	CD4+ T-cells	CD4+ Tcm	CD4+ Tem	CD4+ memory T-cells	CD4+ naive T-cells	CD8+ T-cells	CD8+ Tcm	CD8+ Tem	CD8+ naive T-cells	CLP	CMP	Chondrocytes	Class-switched memory B-cells	DC	Endothelial cells	Eosinophils	Epithelial cells	Erythrocytes	Fibroblasts	GMP	HSC	Hepatocytes	Keratinocytes	MEP	MPP	MSC	Macrophages	Macrophages M1	Macrophages M2	Mast cells	Megakaryocytes	Melanocytes	Memory B-cells	Mesangial cells	Monocytes	Myocytes	NK cells	NKT	Neurons	Neutrophils	Osteoblast	Pericytes	Plasma cells	Platelets	Preadipocytes
TCGA.A6.3807.01	0	0	0.0133	0.0099	0	0	0	0.0311	0	0.0046	0.0022	0	0.0082	0.097	0	0	0.0032	0.0029	0	0.0085	0.0634	0	0	0.0274	0.0875	0	0.0054	0	0	0.0888	0.0234	0.0104	0.0124	0.009	0.0015	0.0006	0	0.0012	0.0027	0.0012	0	0.0419	0.0003	0.0134	0	0	0.0103	0	0
TCGA.A6.3808.01	0.0076	0.025	0.0122	0.0144	0	0	0	0.0321	0	0	0	0	0.0014	0.0978	0	0.012	0.0008	0.0204	0.016	0.0016	0.0308	0	0.0801	0.0842	0.1061	0	0.0007	0	0	0.0647	0.03	0.0178	0.0076	0.0122	0.0015	0.0003	0	0	0.0506	0.0067	0	0.0738	0.0025	0.0017	0	0	0.0023	0	0
TCGA.A6.3810.01	0.0047	0.0147	0.0164	0.0285	0	0	0.0017	0.0413	0	0.0145	0.0038	0	0.0146	0.0846	0	0.0153	0.0046	0.0119	0.0023	0	0.039	0	0.0308	0.0106	0.0648	0	0.0009	0	0	0.0679	0.035	0.0098	0.0246	0.0112	0.0002	0.0021	0	0.0007	0.0375	0	0	0.0118	0.0018	0.0042	0	0	0.0099	0	0
TCGA.AA.3518.01	0	0	0.0352	0.0975	0	0.0126	0.0135	0.0376	0	0	0.014	0	0.0097	0.0977	0	0	0.018	0.0098	0	0	0.0473	0	0	0	0	0	0.0022	0.0017	0	0.0618	0.0165	0.0129	0.0032	0.0021	0.0001	0.0014	0.0029	0.021	0.0002	0	0	0.0216	0.0003	0	0	0	0.0095	0	0
TCGA.AA.3525.01	0	0	0.0276	0.0505	0	0	0	0.0244	0	0	0	0	0.003	0.0665	0	0	0.0141	0.0073	0.0011	0.0209	0.0529	0.0002	0	0.1084	0.0092	0	0.0017	0.0181	0	0	0.0094	0.005	0.0069	0.0096	0	0	0.0035	0.0121	0.0042	0	0	0.0261	0.0001	0.006	0	0	0.0287	0	0
TCGA.AA.3529.01	0	0	0	0.0322	0	0	0	0.0085	0	0	0	0	0.0067	0.1057	0	0	0	0.0011	0	0.0291	0.0677	0.0006	0	0.0914	0.0651	0	0.0017	0.0285	0	0.0628	0.0053	0.0002	0.0108	0.0081	0.0015	0.0005	0	0.0164	0	0.0033	0	0.0578	0.0008	0.0036	0.0185	0	0	0	0
TCGA.AA.3531.01	0	0	0.0053	0.0448	0	0.0288	0	0	0	0	0	0	0	0.0435	0	0	0.0015	0	0.0096	0.0149	0.0448	0.0001	0	0	0.0151	0	0	0.0203	0	0.1183	0	0	0.0001	0.0003	0.0028	0.0004	0	0	0	0	0	0.1034	0.0006	0	0	0.0563	0.0027	0	0
TCGA.AA.3534.01	0	0	0	0.0275	0	0	0	0.0305	0	0.0017	0	0	0.0087	0.1258	0	0	0	0.0028	0.0017	0.0095	0.0316	0	0	0.0264	0.0916	0	0	0	0	0	0.0044	0.0005	0.0014	0.0077	0.0012	0.002	0	0.027	0	0.0046	0	0.0282	0.0012	0.0002	0.0046	0	0	0	0
TCGA.AA.3552.01	0	0	0.0991	0.0509	0	0.0279	0.0237	0.0271	0	0.0078	0.0098	0	0.0104	0.042	0	0	0.0338	0.0129	0.0256	0.0202	0.0619	0.0002	0	0.031	0.07	0	0.0002	0.0097	0	0.037	0.0175	0.017	0.0115	0.0072	0.0011	0.0045	0.0201	0.0188	0.0078	0	0	0.0567	0.0002	0.0002	0	0	0.0235	0	0
TCGA.AA.3554.01	0	0.0067	0.0527	0.0372	0	0	0.022	0.0193	0	0	0.0065	0	0.0032	0.0478	0	0	0.0144	0.0362	0.0223	0.0301	0.0896	0	0	0.0526	0.0285	0	0.0191	0	0	0.1891	0.0538	0.0351	0.0253	0.0077	0.0019	0	0.0072	0	0.0727	0	0	0.0477	0	0.0235	0	0.0197	0.0077	0	0
TCGA.AA.3561.01	0	0	0.0035	0.049	0	0	0	0.0497	0	0	0	0	0.0092	0.1707	0	0	0	0	0.0004	0	0.0281	0	0	0	0.0396	0	0	0.0004	0	0	0.0099	0	0.0133	0	0	0	0	0	0.0167	0.0022	0	0.0181	0.003	0.005	0	0	0.004	0	0
TCGA.AA.3664.01	0	0	0.0219	0	0.0121	0.0001	0	0.0504	0	0.0009	0	0	0.0072	0.1352	0	0	0.0064	0.002	0	0	0.0362	0	0	0	0.0178	0	0.0018	0	0	0	0.0022	0.0016	0.0053	0.0088	0	0	0	0.005	0.0011	0.0014	0.0006	0	0.0004	0.0004	0	0	0.0076	0.0069	0
TCGA.AA.3666.01	0	0	0.0175	0.0479	0	0	0	0.0455	0	0.002	0	0	0.0082	0.1408	0	0	0.0119	0.0088	0.0047	0	0.0341	0	0	0	0.0541	0	0	0	0	0	0.0224	0.0038	0.0256	0.0043	0.0023	0	0	0	0.0202	0.0013	0	0.0217	0.0001	0.0046	0	0	0.0075	0	0
TCGA.AA.3672.01	0	0.017	0.05	0.1243	0	0.0814	0.0266	0	0	0.0296	0.0415	0.0228	0.0041	0.0137	0	0	0.0274	0.0159	0.03	0.0094	0.0443	0	0	0	0.0016	0	0	0.001	0.0019	0.2387	0.0399	0.0272	0.0227	0.002	0	0.0074	0	0.0193	0.0339	0	0	0.0991	0.0003	0.0156	0	0.1071	0.0021	0	0
TCGA.AA.3684.01	0.0135	0.1022	0.0197	0.0829	0	0.0444	0.0529	0	0	0	0	0	0	0.0059	0.0077	0	0.0287	0.0226	0.0666	0.0645	0.0615	0	0.0743	0.0173	0.0952	0.0037	0	0	0	0.3867	0.0509	0.0506	0.0428	0.0038	0.0044	0.0095	0.0021	0.0318	0.0428	0	0	0.1546	0.001	0.0107	0	0.1392	0	0	0
TCGA.AA.3710.01	0	0	0.0824	0.1176	0	0	0	0.0563	0	0.0731	0.1128	0.0113	0.0209	0.0841	0	0	0.0423	0.0275	0.0092	0	0.0682	0	0	0	0	0	0.0018	0	0	0.0291	0.0559	0.0266	0.0472	0.0057	0.0014	0.0028	0.0025	0.0104	0.0485	0	0	0.0108	0	0.0387	0	0	0.0199	0	0
TCGA.AA.3715.01	0.0057	0.073	0.0529	0.1248	0	0.0461	0.0334	0	0.0073	0	0.0224	0	0.0019	0.0277	0	0	0.0236	0.0387	0.0214	0.0178	0.0752	0	0	0	0.0254	0	0.0192	0	0	0.4469	0.0481	0.0342	0.0233	0	0	0.0039	0.001	0.0325	0.0866	0	0	0.0683	0	0.0077	0	0.0605	0.0171	0	0
TCGA.AA.3818.01	0	0	0.0061	0.0066	0	0	0	0.0254	0	0.0081	0.0001	0	0.0127	0.1252	0	0	0.0083	0.0009	0	0.0051	0.0492	0	0	0	0.0443	0	0.002	0	0	0	0.0059	0	0.0072	0	0.0007	0	0	0	0	0.0029	0	0.0794	0.0009	0	0	0	0.0045	0	0
TCGA.AA.3848.01	0	0	0.0112	0.0596	0	0.0718	0.0073	0	0	0	0	0	0	0.0294	0.0048	0	0.0058	0	0.0168	0.0281	0.0555	0	0	0	0.0404	0	0.0001	0.0098	0	0.3694	0.0001	0.0008	0.0178	0	0.0019	0.0041	0	0	0	0	0	0.1251	0.0007	0	0	0.0688	0.006	0	0
TCGA.AA.3864.01	0	0	0.0174	0.0437	0	0	0	0.0369	0	0	0	0	0.0082	0.1382	0	0	0.0034	0.002	0	0	0.0291	0	0	0	0.0284	0	0.0002	0.0123	0	0	0.0184	0.0089	0.0102	0.0102	0.001	0	0	0	0	0.0028	0	0.0451	0.0003	0	0	0	0.0088	0	0
TCGA.AA.3986.01	0	0	0.1192	0.0831	0	0.0066	0.0374	0.0589	0.0162	0.0252	0.0354	0	0.0118	0.0542	0	0	0.0447	0.0236	0.0021	0.0098	0.0513	0	0	0.0454	0.0675	0	0	0	0	0	0.0149	0.0162	0.0116	0.0146	0.0002	0	0.0263	0.0117	0.0191	0	0	0.1342	0.0001	0.0012	0.0001	0	0.0506	0	0
TCGA.AA.3989.01	0	0	0.0531	0.0624	0	0.0104	0.0175	0.0172	0	0.0232	0.0323	0	0.002	0.0545	0	0	0.0211	0.0082	0.0154	0.0008	0.0446	0	0	0	0.0713	0	0	0	0	0.1179	0.0242	0.023	0.0062	0	0.0007	0.0002	0.0063	0	0.0064	0	0	0.0896	0.0005	0.0026	0	0.0449	0.0255	0	0
TCGA.AA.A004.01	0	0.0144	0.0965	0.2886	0	0.0889	0	0	0	0	0	0	0	0	0	0	0.0653	0.0038	0.1105	0.048	0.0475	0	0	0	0.062	0.0079	0	0	0	0.351	0	0.002	0.0241	0	0	0.0019	0.0175	0.051	0	0	0	0.2282	0.001	0	0	0.285	0.0185	0	0
TCGA.AA.A00A.01	0	0	0.0346	0.0863	0	0.0044	0.0126	0.04	0	0	0.0075	0	0.0061	0.0801	0	0	0.0374	0.0058	0.0103	0	0.0457	0	0	0	0.0149	0	0	0	0	0.0756	0.0147	0.005	0.0079	0.0142	0.0009	0	0	0.014	0	0	0	0.0643	0	0	0	0	0.0038	0	0
TCGA.AA.A00E.01	0	0	0.101	0.0698	0	0.0062	0	0.0387	0	0	0.0073	0	0.0039	0.0585	0	0	0.0357	0.0252	0.0034	0.0001	0.042	0.0007	0	0.0076	0.0106	0	0	0.011	0	0.0377	0.0609	0.0319	0.0316	0.0093	0	0.0003	0.0242	0.0302	0.0047	0	0	0.0344	0	0.0011	0	0	0.0244	0	0
TCGA.AA.A00F.01	0	0.0029	0	0.0157	0	0.0188	0.0077	0.0133	0	0	0	0	0.0008	0.0523	0	0	0.0035	0	0.0106	0.0055	0.0545	0.0006	0	0	0.1145	0	0.001	0.0084	0	0.1532	0	0	0.0008	0.0045	0.0007	0	0	0.0279	0	0	0	0.0595	0.0001	0.002	0	0	0.001	0	0
TCGA.AA.A00J.01	0	0	0.019	0.0229	0.0052	0.0004	0	0.0307	0	0	0	0	0.0077	0.1516	0	0	0.0009	0.0093	0.0049	0	0.0246	0	0	0	0.0241	0	0	0	0	0.057	0.0156	0.0051	0.0078	0.0072	0.0016	0.0012	0	0	0.0009	0.0076	0	0.0055	0.0014	0	0	0	0.0077	0.0004	0
TCGA.AA.A00K.01	0	0	0.0109	0.02	0	0.0109	0.0161	0.0148	0	0	0	0	0.0049	0.0705	0	0	0.0084	0.0031	0.0136	0.004	0.0476	0	0	0.0183	0.062	0	0	0.0235	0	0.0476	0.0015	0	0.0086	0.0047	0.0005	0	0.0016	0.0053	0	0.0024	0	0.1119	0.0005	0	0	0.0249	0.0083	0	0
TCGA.AA.A00N.01	0.0043	0.0948	0	0.0254	0	0	0.0119	0.0097	0	0	0	0	0.007	0.0771	0	0.0022	0	0.0049	0.0392	0	0.0733	0	0	0	0.0744	0	0.005	0	0	0.09	0.013	0.0113	0.0153	0.0021	0.0023	0.0008	0	0.0186	0.0278	0	0	0.0388	0.0002	0.0025	0	0	0.0002	0	0
TCGA.AA.A00O.01	0	0	0	0	0	0.0136	0	0	0.0067	0.0587	0	0	0.0079	0.0649	0	0	0.0052	0	0.1001	0	0.0438	0	0	0	0.2204	0	0.0007	0	0	0.2139	0	0.0007	0.0052	0	0.005	0.0014	0	0.0026	0	0	0	0.0287	0.0053	0	0	0.0716	0	0	0
TCGA.AA.A00R.01	0	0	0.1308	0.1487	0.0047	0	0	0.0679	0.0311	0.0884	0.1001	0.0509	0.0226	0.073	0	0	0.0591	0.0189	0.0143	0	0.0151	0	0	0	0.0302	0	0	0.0196	0	0.103	0.0544	0.0433	0.0172	0.007	0	0	0.0222	0	0.0001	0	0.02	0.0355	0	0	0	0	0.0217	0	0
TCGA.AA.A00U.01	0	0	0.0113	0.0275	0	0	0	0.0341	0	0	0	0	0.0145	0.0958	0	0	0.0092	0	0.0075	0	0.0535	0	0	0	0.0244	0	0	0.0147	0	0.0218	0	0	0.0013	0.0076	0.0001	0.0001	0	0.0105	0	0.0069	0	0.0783	0.0002	0	0	0	0.0044	0	0
TCGA.AA.A010.01	0	0	0.0363	0.042	0	0	0	0.0279	0	0	0	0	0	0.0941	0	0	0.0188	0.0013	0.0024	0	0.034	0	0	0	0.0049	0	0	0.0169	0	0.0116	0.0096	0.0015	0.0099	0.0132	0.0009	0	0.0032	0	0	0	0	0.1248	0.0014	0	0	0	0.0128	0	0
TCGA.AA.A017.01	0	0	0	0.0563	0	0.042	0	0.0109	0	0	0	0	0	0.0589	0	0	0	0	0.0098	0.0017	0.049	0	0.0089	0	0.1	0.0018	0	0	0	0.1365	0	0	0.0049	0.0047	0.0041	0.0027	0	0.0024	0	0	0	0.0598	0.0007	0.0003	0	0.01	0.0076	0	0
TCGA.AA.A01C.01	0.006	0.0346	0	0.0393	0	0.0201	0	0.0052	0	0	0	0	0.0042	0.0576	0	0.0081	0	0	0.008	0.0007	0.0412	0	0	0	0.1027	0	0	0.0223	0	0.1767	0.002	0.0049	0.0037	0.0006	0.0007	0	0	0	0	0	0	0.0538	0.0009	0	0	0.0175	0	0	0
TCGA.AA.A01D.01	0.0012	0.0131	0	0.0407	0	0.0083	0	0.0024	0	0	0	0	0.0063	0.0553	0	0	0	0.0102	0.029	0.0066	0.0553	0	0	0	0.1056	0.004	0.0001	0	0	0.2302	0.0407	0.021	0.0609	0.0079	0.0021	0	0	0	0.0025	0	0	0.029	0.0003	0.0022	0	0.0028	0	0	0
TCGA.AA.A01F.01	0	0	0	0.0146	0	0.0404	0.0174	0.0218	0	0	0	0	0.0023	0.0652	0	0	0.0021	0	0	0.0037	0.0525	0	0	0	0.0265	0	0.0041	0.0016	0	0.0193	0	0	0.0015	0.0063	0.002	0.0019	0	0	0	0	0	0.0896	0.0006	0	0	0.0168	0.0051	0	0
TCGA.AA.A01I.01	0	0	0.0321	0.0108	0.0054	0	0	0.0542	0	0.0149	0.0027	0	0.0108	0.1635	0	0	0.0032	0	0	0	0.0226	0	0	0	0.0215	0	0.0033	0	0	0	0.0009	0	0.0029	0.0073	0.001	0	0	0	0.0001	0.0102	0	0	0.001	0.0037	0	0	0.0068	0.0064	0
TCGA.AA.A01K.01	0.0056	0.0167	0.0079	0	0.0017	0.025	0.0043	0.0277	0	0.0077	0	0	0.0062	0.1024	0	0	0	0.0034	0.0023	0	0.0358	0	0	0.0009	0.1277	0	0.0034	0.005	0	0.1454	0.009	0.007	0.0138	0.0048	0.0003	0.0013	0	0.0055	0	0	0	0.0237	0.0006	0	0	0	0.0172	0	0
TCGA.AA.A01P.01	0	0.0366	0.1346	0.0558	0	0	0.0265	0.0341	0.009	0.0793	0.0884	0.0156	0.0155	0.0781	0	0	0.0434	0.0101	0.0418	0	0.0548	0	0	0	0.0734	0	0	0	0	0.1683	0.0274	0.0245	0.013	0.0072	0.0019	0.0036	0.0169	0	0.0114	0	0	0.0347	0	0	0	0.0041	0.0279	0	0
TCGA.AA.A01R.01	0	0	0.0503	0.116	0	0.0632	0.0449	0.0103	0.0141	0.0713	0.0916	0.0445	0.015	0.0325	0	0	0.0488	0.0195	0.0015	0.0004	0.0577	0	0	0	0	0	0.0115	0.0154	0	0.2739	0.0372	0.0327	0.0233	0.0111	0	0.0004	0	0.0088	0	0	0	0.0828	0.0001	0	0	0.1025	0.0035	0	0
TCGA.AA.A01S.01	0	0	0	0.0431	0	0.0189	0	0	0	0	0	0	0	0.0479	0	0	0.0076	0	0	0.0048	0.0547	0	0	0	0.0244	0	0.0012	0.0358	0	0.131	0	0	0	0.001	0.0001	0.0008	0.0032	0	0	0.0036	0	0.1504	0.0007	0	0	0.0335	0.0027	0	0
TCGA.AA.A01T.01	0	0	0	0.0675	0	0.051	0	0	0	0	0	0	0	0.0139	0	0	0.0143	0	0.0152	0.0199	0.0696	0	0	0	0.004	0	0.0001	0.0185	0	0.2019	0	0	0.0082	0	0	0.0011	0	0.0127	0	0	0	0.1165	0.0007	0	0	0.0574	0.0035	0	0
TCGA.AA.A01V.01	0	0	0.0073	0.0581	0	0.0532	0.0157	0.02	0	0	0.0013	0	0.0072	0.0441	0	0	0.0057	0	0.0041	0.0002	0.0592	0	0	0	0	0	0.0007	0.0092	0	0.0634	0	0	0.0132	0.0032	0	0.0071	0	0.0039	0	0	0	0.1536	0.0002	0	0.0123	0.0883	0.0049	0	0
TCGA.AA.A01X.01	0	0	0.018	0.0236	0	0.0573	0	0	0	0.0073	0	0	0	0.0379	0	0	0.0109	0	0.0083	0.0089	0.0689	0.0001	0	0	0.0769	0	0	0.0008	0	0.2554	0	0.0028	0.0015	0.0035	0.0011	0.0057	0	0.0277	0	0.0065	0	0.0649	0.0008	0	0	0.0215	0.0014	0	0
TCGA.AA.A01Z.01	0	0	0.0032	0.0162	0	0.019	0	0.0058	0	0	0	0	0.0104	0.0614	0	0	0.0116	0	0	0.0028	0.0451	0.0001	0	0	0.0127	0	0.0019	0.0227	0	0.1185	0	0.0011	0.0041	0.0028	0.0018	0.0043	0	0	0	0	0	0.0762	0.0007	0.0003	0	0.0175	0	0	0
TCGA.AA.A022.01	0	0	0.0638	0.0989	0	0.0308	0	0	0	0.0948	0.0995	0.0363	0.0241	0.0498	0	0	0.0344	0.0033	0.003	0	0.0404	0	0	0	0.0127	0	0	0	0	0.178	0.0098	0.0113	0.0172	0.0011	0	0.0038	0.0068	0.0443	0	0	0	0.0623	0.0003	0	0	0.0583	0.0173	0	0
TCGA.AA.A024.01	0	0	0	0	0	0.0206	0.0249	0.0138	0	0	0	0	0.0064	0.0598	0	0	0.0018	0	0.0001	0.0075	0.0807	0	0	0	0.0137	0	0.0125	0	0	0.0034	0	0	0.0035	0.0013	0.0012	0.001	0	0	0	0	0	0.1005	0.0009	0	0	0	0.0028	0	0
TCGA.AA.A029.01	0	0	0.0055	0.0257	0	0.0031	0.0401	0.0139	0	0	0	0	0.0035	0.0849	0	0	0.0091	0	0	0.0029	0.0643	0	0	0	0.0022	0	0.0018	0.0131	0	0.0413	0	0	0.0039	0.0076	0.0017	0.0007	0	0	0	0	0	0.1074	0.0002	0	0	0.009	0.0049	0	0
TCGA.AA.A02E.01	0	0	0.0003	0.0167	0	0.0214	0.0273	0.0255	0	0	0	0	0.0004	0.0753	0	0	0.0039	0	0.0043	0.0048	0.0749	0	0	0	0.055	0	0.0033	0.0036	0	0.0403	0.0017	0.0006	0.0025	0.0048	0.0006	0.0032	0	0.0005	0	0.0009	0	0.0443	0.0009	0	0	0.0078	0.0042	0	0
TCGA.AA.A02H.01	0	0	0	0.0003	0	0.0158	0.0053	0.0133	0	0.01	0	0	0.0062	0.0942	0	0	0	0	0.0014	0.0058	0.0529	0	0	0	0.0815	0	0.0003	0	0	0.0359	0	0.0008	0.0011	0.005	0.0032	0.0012	0	0	0	0	0	0.0527	0.0006	0	0	0.0101	0.0019	0	0
TCGA.AA.A02J.01	0	0	0	0.0134	0	0.0072	0	0.0107	0	0	0	0	0.0091	0.0913	0	0	0	0	0	0	0.0333	0	0	0	0.0207	0	0	0.0247	0	0.0691	0	0	0.0006	0.0011	0.0008	0.0007	0	0	0	0	0	0.0633	0.0011	0	0.0032	0.0157	0.0033	0	0
TCGA.AA.A02O.01	0	0	0.0083	0.0521	0	0.0435	0.0268	0	0	0	0	0	0.003	0.0372	0	0	0.0082	0	0.0197	0.0126	0.0494	0	0	0	0.0332	0	0	0.019	0	0.1458	0	0	0.0034	0	0.0017	0.0022	0.0009	0.0038	0	0	0	0.0905	0.0016	0	0	0.0617	0.011	0	0
TCGA.AA.A02R.01	0	0	0.0881	0.1734	0	0.0303	0.0103	0.0389	0	0.0329	0.0685	0.0025	0.0196	0.0612	0	0	0.0387	0.0163	0.0021	0	0.0257	0	0	0	0	0	0	0.0063	0	0.2634	0.0786	0.0455	0.0315	0.0116	0	0.0006	0	0.0022	0	0	0	0.0276	0	0	0	0.0099	0.003	0	0
TCGA.AA.A03F.01	0	0	0.0496	0.0361	0	0.0603	0.0549	0	0	0	0	0	0	0.001	0	0	0.0352	0.0002	0.0203	0.0274	0.0832	0	0	0	0.0033	0.0006	0.0078	0.0013	0.0037	0.1116	0	0	0.0155	0.0033	0.0037	0	0.0248	0.0353	0	0	0	0.201	0.0002	0	0	0.0697	0.0209	0	0
TCGA.AA.A03J.01	0	0.0095	0.0117	0.0431	0	0.0699	0.0101	0	0	0.0071	0.0036	0.0012	0.0117	0.0474	0.0026	0	0.0043	0.0074	0.0183	0.024	0.0528	0.0002	0	0	0.0556	0	0	0.0154	0	0.2197	0.0069	0.0082	0.0166	0.0002	0	0	0	0.0204	0	0	0	0.1076	0	0	0	0.0589	0.0084	0	0
TCGA.AF.2691.01	0.0016	0	0.0091	0.0876	0	0.0203	0.0231	0.0349	0	0.0034	0.0031	0	0.012	0.0938	0	0	0.0106	0.0076	0	0	0.047	0	0	0	0.0853	0	0	0	0	0.0668	0.0283	0.0131	0.0336	0.0053	0	0.0042	0	0	0	0	0	0.0323	0.0006	0.0032	0	0	0.0022	0	0
TCGA.AF.2692.01	0	0.0055	0.011	0.0051	0	0.0293	0.009	0.0275	0	0.0123	0	0	0.0159	0.0897	0	0	0.0015	0	0.0021	0.0119	0.0621	0.0005	0	0.0122	0.0547	0	0.0065	0	0	0	0.0025	0.0012	0.0007	0.0051	0.0014	0	0	0.0095	0.004	0	0	0.0283	0.0009	0.0004	0	0	0	0	0
TCGA.AF.3400.01	0	0.1063	0.0115	0.0891	0	0	0.0439	0.0231	0	0	0	0	0	0.0829	0	0	0.005	0.0652	0.1088	0	0.0178	0	0.0188	0.0242	0.0338	0.0017	0	0	0	0.2417	0.0694	0.0355	0.0301	0	0	0.007	0	0	0.3059	0	0	0.0517	0.0001	0.0947	0	0.0564	0	0	0
TCGA.AF.3913.01	0.0034	0	0	0	0	0.0021	0	0.0192	0	0	0	0	0.0054	0.0952	0	0	0	0	0	0.0014	0.039	0	0	0	0.1084	0	0	0.01	0	0.1631	0.0092	0.0046	0.0029	0.0008	0.0017	0	0	0	0.0016	0	0	0.0562	0.0008	0.0034	0	0	0.0032	0	0
TCGA.AG.3574.01	0	0	0	0	0	0	0.0134	0.0163	0	0.0093	0.004	0	0.0118	0.1163	0	0	0	0.0023	0.0065	0.0095	0.0409	0.0005	0	0.0027	0.0966	0	0.0005	0.0162	0	0.0628	0.0096	0.0029	0.0056	0	0.0019	0	0	0	0.0101	0.0001	0	0.0407	0.0024	0	0	0	0.0026	0	0
TCGA.AG.3580.01	0	0	0.025	0.0558	0	0	0.0166	0.0376	0	0	0	0	0.0046	0.1214	0	0	0.0114	0.0041	0	0	0.0478	0	0	0	0.0179	0	0	0.0182	0	0.0231	0.006	0	0.0113	0.0043	0.0001	0.0037	0	0	0.01	0	0	0.1455	0	0.0059	0.0235	0	0.0087	0	0
TCGA.AG.3584.01	0.0068	0	0.0039	0	0	0.0052	0	0.005	0	0	0	0	0	0.0604	0	0	0.0081	0.0021	0.0187	0.0228	0.045	0.0013	0.0021	0.0067	0.1188	0	0	0.0212	0	0.0786	0.023	0.0103	0.0189	0	0.0019	0.0016	0	0	0	0	0	0.2145	0.0001	0.0021	0	0.0264	0.0089	0	0
TCGA.AG.3593.01	0	0	0.0615	0.0134	0.0041	0.0147	0.0212	0.0409	0.0002	0.0176	0.0046	0	0.0128	0.0902	0	0	0.015	0.0093	0.0179	0.0015	0.0336	0	0	0.0301	0.0354	0	0	0.0114	0	0.0233	0.0179	0.0049	0.0201	0.0099	0.004	0.0012	0.0034	0	0.0108	0	0	0.038	0.0007	0.0027	0	0	0.0081	0	0
TCGA.AG.3594.01	0	0	0.0332	0.0782	0	0.0037	0.0498	0.0377	0.0003	0.0328	0.0512	0	0.0088	0.0819	0	0	0.0175	0.0169	0.0134	0.0091	0.0572	0	0	0.015	0.0319	0	0	0.0025	0	0.0174	0.0206	0.0058	0.0225	0.0021	0.0046	0.0032	0	0	0.0162	0	0	0.1155	0	0.0196	0	0	0.0051	0.0075	0
TCGA.AG.4007.01	0.0022	0	0.034	0.0003	0	0.0178	0.002	0.0159	0	0.012	0.0071	0	0.0116	0.0591	0	0	0.0084	0.0073	0.0188	0.019	0.0748	0	0.0045	0.0034	0.109	0	0	0.003	0	0.1432	0.0304	0.0252	0.0243	0	0.0048	0.0041	0.0091	0	0.0054	0	0	0.1303	0.0005	0.0077	0	0.0363	0.019	0	0
TCGA.AG.A002.01	0	0	0.0055	0.0059	0.0051	0.0101	0	0.0242	0	0	0	0	0.0056	0.0912	0	0	0.0061	0	0.0232	0.0025	0.032	0	0	0	0.0039	0	0.0001	0	0	0.0826	0.0019	0	0.0052	0.0169	0.0025	0.0025	0	0	0	0.0068	0	0.018	0.0014	0	0	0.0041	0.0101	0	0
TCGA.AG.A008.01	0	0	0.0141	0.0244	0	0.0237	0.0334	0.0223	0	0	0	0	0.0044	0.0791	0	0	0.0081	0	0.0012	0.0004	0.0456	0	0	0	0.0061	0	0	0.0167	0	0	0	0	0	0.0077	0.0014	0	0.0013	0	0	0	0	0.1085	0.0011	0	0	0	0.003	0	0
TCGA.AG.A00C.01	0	0	0.0282	0.0504	0	0.031	0.0083	0.0245	0	0	0	0	0.0042	0.0728	0	0	0.0138	0	0	0	0.0529	0	0	0	0.0066	0	0	0.0008	0	0.0577	0	0	0.0025	0.0056	0.001	0.0016	0.0073	0	0	0	0	0.1067	0	0	0	0	0.012	0	0
TCGA.AG.A00H.01	0.0051	0.0899	0	0	0	0.0193	0.0015	0.0035	0	0	0	0	0.003	0.0525	0	0	0	0.0011	0.0043	0.0038	0.06	0	0.0103	0.0012	0.0914	0	0.0016	0.0106	0	0.2069	0	0	0.0061	0	0.0011	0.0005	0	0.004	0	0	0	0.0564	0.0008	0	0	0.0365	0	0	0
TCGA.AG.A00Y.01	0	0	0.0603	0.058	0	0.0358	0.0183	0.0199	0	0	0	0	0.004	0.0709	0.0003	0	0.0244	0	0.0032	0.0061	0.0583	0	0	0	0.0199	0	0	0.0217	0	0.0525	0	0	0.0041	0.0105	0	0.0027	0.0161	0.0052	0	0	0	0.1101	0.0003	0	0	0.0134	0.0094	0	0
TCGA.AG.A011.01	0	0	0.049	0.0092	0	0.0484	0.0037	0.0118	0	0	0	0	0.0064	0.0172	0	0	0.0496	0	0.0004	0.0039	0.0334	0.0007	0	0.005	0.0387	0	0	0.0192	0	0.1083	0.0045	0	0.0206	0.0057	0	0	0.0033	0	0	0.0006	0	0.0929	0.0007	0.0004	0	0	0.0127	0	0
TCGA.AG.A014.01	0	0	0	0.034	0	0.0372	0	0.0003	0	0	0	0	0.0055	0.047	0	0	0	0	0.0043	0.0096	0.0644	0	0	0	0.0438	0	0.0032	0.0258	0	0.149	0	0	0.0088	0.0044	0.0033	0.0013	0	0	0	0	0	0.0815	0.0001	0	0	0.0222	0.0014	0	0
TCGA.AG.A015.01	0	0	0.0189	0.007	0	0.0154	0.0282	0.0269	0	0	0	0	0.0066	0.0834	0	0	0.0118	0	0	0.0014	0.0566	0	0	0	0.0159	0	0.0038	0	0	0	0	0	0	0.009	0.0006	0	0.0013	0	0	0	0	0.0432	0.0003	0	0	0	0.0035	0	0
TCGA.AG.A016.01	0	0	0	0.0343	0	0.0293	0	0.0059	0	0	0	0	0.0002	0.0437	0	0	0	0	0.0044	0.0068	0.0453	0	0	0	0.0281	0	0	0.0229	0	0.2087	0	0	0.0058	0.0049	0.0017	0.0003	0	0	0	0	0	0.0821	0.0006	0	0	0.0488	0.0058	0	0
TCGA.AG.A01J.01	0	0	0.0066	0.0343	0	0.0245	0	0.0053	0	0	0	0	0.004	0.0472	0	0	0.0167	0	0.0011	0.0075	0.0599	0	0	0	0.0459	0	0	0.0082	0	0.0533	0	0	0.003	0.0033	0	0.0009	0.0013	0	0	0	0	0.1162	0.0014	0	0	0.015	0.0065	0	0
TCGA.AG.A01L.01	0	0	0.0049	0.0275	0	0.0418	0.0184	0.0135	0	0	0	0	0.0066	0.0514	0.0002	0	0.0278	0	0.002	0.0036	0.0671	0	0	0	0.0358	0	0.0028	0	0	0.1587	0	0	0.0004	0.0083	0.0017	0	0	0	0	0	0	0.0675	0.0008	0	0	0	0.0049	0	0
TCGA.AG.A01N.01	0	0	0	0	0	0.034	0	0.004	0	0	0	0	0	0.0638	0	0	0	0	0.0006	0	0.0438	0	0	0	0.1018	0	0	0.0181	0	0.1358	0	0	0	0.0027	0.0005	0.0023	0	0	0	0	0	0.092	0.0007	0.0042	0	0.018	0	0	0
TCGA.AG.A01W.01	0	0	0.0554	0.0039	0.0022	0.0074	0	0.0335	0	0.0092	0.0004	0	0.024	0.1394	0	0	0.0097	0.0015	0	0	0.0307	0	0	0	0.0244	0	0	0.0339	0	0.0881	0.005	0	0.0046	0.0111	0.0005	0	0.015	0	0	0	0.0076	0.0704	0.0002	0	0	0	0.0056	0	0
TCGA.AG.A01Y.01	0.0011	0	0.0573	0	0.0049	0.0381	0	0.0312	0	0.0239	0.0131	0	0.0263	0.0969	0	0	0.011	0.0093	0	0	0.0142	0	0.0049	0.007	0.0388	0	0	0.0123	0	0.0679	0.016	0.0075	0.005	0.0149	0	0.0005	0.008	0	0	0	0.0187	0.033	0.0022	0	0	0.0128	0.0164	0.0039	0
TCGA.AG.A020.01	0	0	0.0132	0.0433	0	0.0082	0	0.0174	0	0	0	0	0.0058	0.1044	0	0	0.0063	0	0	0	0.046	0	0	0	0.0034	0	0	0.0112	0	0	0	0	0	0.0074	0	0	0	0	0	0	0	0.1249	0.0005	0	0	0	0.0078	0	0
TCGA.AG.A026.01	0.0024	0	0	0	0	0.024	0	0.0028	0	0	0	0	0.0059	0.0686	0	0	0	0	0.0038	0.001	0.0547	0	0.0622	0	0.0588	0	0.001	0	0	0.1656	0	0	0	0	0.002	0.0029	0	0	0	0.0127	0	0.0869	0.0064	0	0	0.083	0.0006	0	0
TCGA.AG.A02N.01	0	0	0.0383	0.0325	0.0101	0.0079	0.0161	0.0491	0	0.0048	0.0169	0	0.0239	0.1317	0	0	0.0128	0.0002	0	0.0004	0.0523	0	0	0.0192	0.0025	0	0.003	0.0051	0	0	0.002	0	0.0071	0.0195	0	0	0.0041	0	0	0.0012	0.004	0.0245	0.0002	0.001	0	0	0.0052	0.0042	0
TCGA.AG.A02X.01	0	0	0.0145	0.0164	0	0.0127	0.0662	0.0192	0	0	0	0	0	0.065	0	0	0.014	0	0	0	0.0548	0	0	0	0	0	0	0.015	0	0.0501	0	0	0	0.0048	0	0.0008	0.0044	0	0	0	0	0.1848	0.0004	0	0	0.0487	0.0065	0	0
TCGA.AG.A032.01	0	0	0.0076	0.0892	0	0.0309	0	0.0064	0	0	0	0	0	0.0537	0	0	0.016	0	0.0041	0.0011	0.0598	0	0	0	0.0716	0	0.0003	0	0	0.0932	0	0	0	0.0023	0	0.0001	0	0.0068	0	0	0	0.0632	0.0025	0	0	0.0154	0.003	0	0
TCGA.AG.A036.01	0.0011	0	0.0198	0.0419	0	0	0	0.0325	0	0.0046	0	0	0.0121	0.0939	0	0	0	0	0.0019	0	0.0275	0	0	0	0.0715	0	0	0.0114	0	0	0.0006	0	0.011	0.0088	0.0003	0	0	0	0	0.0042	0	0.0166	0.0004	0	0	0	0.0014	0	0
[truncated: 62 more columns]

## Sheet: Table S3f
Sample	Adipocytes	Astrocytes	B-cells	Basophils	CD4+ T-cells	CD4+ Tcm	CD4+ Tem	CD4+ memory T-cells	CD4+ naive T-cells	CD8+ T-cells	CD8+ Tcm	CD8+ Tem	CD8+ naive T-cells	CLP	CMP	Chondrocytes	Class-switched memory B-cells	DC	Endothelial cells	Eosinophils	Epithelial cells	Erythrocytes	Fibroblasts	GMP	HSC	Hepatocytes	Keratinocytes	MEP	MPP	MSC	Macrophages	Macrophages M1	Macrophages M2	Mast cells	Megakaryocytes	Melanocytes	Memory B-cells	Mesangial cells	Monocytes	Myocytes	NK cells	NKT	Neurons	Neutrophils	Osteoblast	Pericytes	Plasma cells	Platelets	Preadipocytes
01CO005	0	0	0	0	0	0.0139	0	0	0	0	0	0	0	0.0346	0	0	0	0	0.0218	0.0066	0.0395	0	0	0	0.0556	0.0014	0.0092	0.0871	0	0.0199	0	0	0.018	0.0071	0.0139	0.0033	0.0178	0.0172	0	0.004	0	0.1276	0.0011	0	0.0289	0.1342	0.0071	0	0
01CO006	0.0155	0.0136	0.1206	0.0103	0	0	0.0071	0	0.0295	0.0148	0.0013	0	0	0.0134	0	0.0006	0.1562	0.0255	0.0389	0	0.0033	0	0.0453	0.1343	0.1055	0.0115	0	0.0095	0	0	0.0353	0.0246	0.043	0.0118	0.0233	0.0014	0.0574	0.0468	0.0211	0.0672	0	0.1342	0.0228	0	0	0	0.0249	0.0274	0.0199
01CO008	0	0	0.0048	0	0	0	0.0309	0	0	0	0	0	0	0.033	0.0024	0	0.0116	0	0.0065	0.0067	0.0313	0.0006	0	0.0034	0.0222	0	0.0087	0.0073	0	0.0546	0.0019	0.0006	0.0007	0.0091	0.0034	0.0069	0.0149	0	0	0.0286	0	0.1208	0.0092	0	0	0	0.0088	0.0155	0
01CO015	0	0	0	0.0837	0	0	0	0	0	0	0	0	0	0.096	0	0	0	0.0021	0.0133	0	0.0085	0.0075	0	0.0032	0.0818	0.0052	0.0029	0.0988	0	0.0712	0.0279	0.013	0.0323	0	0.0019	0.0093	0	0.0005	0	0.0056	0	0.0021	0.0039	0	0.0156	0.0409	0.0194	0	0
01CO019	0	0.0001	0	0.1134	0	0	0	0	0	0	0	0	0	0.0489	0	0	0	0	0.0124	0.0023	0.0231	0	0	0	0.05	0.0034	0.0056	0.0882	0	0.167	0.002	0.0012	0.0118	0.0026	0.0045	0	0.0043	0	0	0.0536	0	0.0223	0.0032	0	0	0.0787	0.0128	0	0
01CO022	0	0	0	0	0	0	0	0.0001	0	0	0	0	0	0.0747	0	0	0	0	0	0	0.028	0.0014	0	0	0	0	0.0146	0.0866	0	0.0561	0.0009	0	0	0	0	0.0007	0.0068	0.0018	0	0.0055	0	0.1162	0.0039	0	0.0125	0.0005	0.0255	0	0
05CO002	0.04	0.1663	0	0	0	0.0007	0	0	0	0	0	0	0	0	0	0	0	0	0.125	0.0233	0	0	0.0944	0.0126	0.3592	0	0	0	0	0.6867	0.0096	0	0.0271	0	0.0471	0.0085	0	0.0185	0	0.0506	0	0.0337	0.0282	0	0	0.2539	0	0.0016	0
05CO003	0	0.087	0	0.0373	0	0	0	0	0	0	0	0	0	0.0036	0	0	0.0032	0.0059	0.024	0.0134	0.0422	0	0	0	0	0.0023	0.0185	0.0166	0	0.1161	0.0213	0.0075	0.0265	0.0135	0.012	0.0053	0.0095	0.0367	0.0162	0	0	0.1522	0.0009	0.0105	0	0.216	0.0077	0	0
05CO006	0	0.0026	0.0065	0.0421	0	0	0.0121	0	0	0	0	0	0	0.0365	0	0	0	0.0031	0.0046	0.0033	0.0048	0.0011	0	0.0259	0.0112	0	0.0043	0.0276	0	0	0.0479	0.0086	0.095	0.0059	0	0.0067	0.0026	0.0111	0	0.0087	0	0.1212	0.0045	0.0006	0	0.0531	0.0186	0	0
05CO011	0	0.0141	0	0.1614	0	0.0121	0	0	0	0	0	0	0	0.0061	0	0	0	0	0.0075	0.0355	0.0323	0	0	0	0.1501	0.0059	0.0067	0.0353	0	0.1559	0	0	0	0.014	0	0.0044	0	0.0492	0	0.0018	0	0.0432	0.0036	0	0	0.1239	0.0022	0	0
05CO015	0	0.0201	0.0022	0.2186	0	0	0	0	0	0	0	0	0	0.0583	0	0	0.0344	0.0362	0.052	0.0197	0.0208	0.0082	0	0.0337	0.0264	0.0048	0.0024	0.0534	0	0.1893	0.051	0.0301	0.0435	0.007	0.0121	0.0015	0.0044	0.0347	0	0.0452	0	0	0.0007	0.0079	0	0.1142	0.0313	0	0
05CO020	0	0.0937	0	0.0153	0	0.0106	0	0	0	0	0	0	0	0.0053	0	0	0.0175	0.0034	0.0356	0.0158	0.0132	0.0031	0	0.006	0.0645	0.0022	0.0007	0.0244	0	0.2846	0.0045	0.0087	0	0.0129	0.0141	0.0035	0.0055	0.0263	0	0.0085	0	0.1814	0.0026	0	0	0.2279	0.003	0	0
05CO026	0	0.0413	0	0.0656	0	0	0	0	0	0	0	0	0	0.0347	0	0	0	0	0.0241	0	0.0251	0	0	0	0.1218	0.003	0.0055	0.0832	0	0.2727	0	0	0	0.0046	0.0075	0.0006	0	0.0136	0	0.0236	0	0.0376	0.0025	0	0	0.1524	0.0116	0	0
05CO028	0	0	0.0008	0.0606	0	0	0	0.0034	0	0	0.0009	0	0.0057	0.1265	0	0	0.026	0.0016	0.0009	0.0009	0.0125	0.0035	0	0.0785	0.0405	0	0.0075	0.0925	0	0	0.0247	0.0093	0.0533	0	0.0043	0	0.0124	0	0.0009	0.0225	0	0.0024	0.0056	0.0049	0.0196	0	0.0313	0.0047	0
05CO029	0	0	0.0215	0.0477	0	0	0	0.0021	0	0	0	0	0.0037	0.114	0	0	0.0486	0.0034	0.0044	0	0.019	0.007	0	0.0339	0.0492	0	0.005	0.083	0	0	0.0251	0.0085	0.029	0	0.0053	0	0.0393	0	0.0011	0.0185	0	0.1039	0.0083	0.0004	0.0255	0	0.038	0	0
05CO032	0.0148	0	0	0.0764	0	0	0	0	0	0	0	0	0	0.1001	0	0	0.0137	0.0476	0.0224	0	0.0003	0.0241	0.0037	0.0969	0.0453	0	0.0029	0.0832	0	0.1724	0.0555	0.0369	0.0508	0	0	0.0139	0.0134	0	0.0024	0.0227	0	0.1154	0.0103	0.0038	0	0	0.0471	0	0
05CO033	0.0265	0	0.0461	0.0076	0	0	0.0177	0.0073	0	0	0.0135	0	0	0.0499	0	0	0.1139	0.048	0.0176	0.0137	0.0066	0.006	0.0534	0.197	0.1413	0	0.0132	0.0171	0	0.4683	0.0853	0.0234	0.1119	0.0015	0.0007	0.01	0.0165	0.0122	0.0639	0.0553	0	0	0.01	0.0163	0	0.0178	0.0265	0.0021	0
05CO034	0.0042	0.0286	0	0.1252	0	0	0	0	0	0	0	0	0	0.0278	0.0149	0	0	0	0.0055	0.0011	0.0094	0.0015	0	0.0233	0.1315	0.0047	0.0051	0.0404	0	0.2853	0.016	0.0044	0.0379	0.0073	0	0.007	0	0.0208	0	0.0685	0	0	0.0118	0	0	0.073	0.0093	0	0
05CO035	0	0.0558	0	0.0603	0	0.0037	0	0	0.007	0	0	0	0	0.0001	0	0	0	0	0.0199	0.0117	0.0158	0	0	0	0.1585	0.0036	0.0041	0.0093	0	0.4769	0.0003	0.0012	0.008	0.0042	0.0076	0.005	0	0	0	0.0413	0	0.0546	0.0101	0	0	0.1436	0.0069	0	0
05CO037	0	0.045	0	0	0	0	0.0056	0	0	0	0	0	0	0.0147	0	0	0	0.0126	0	0	0.0154	0.0026	0	0	0.0884	0	0.0049	0.0478	0	0.5126	0.0327	0.006	0.0462	0.0004	0.0022	0.0183	0.0071	0.0351	0.0041	0	0	0.1167	0.0134	0	0	0.1937	0.0056	0	0
05CO039	0	0	0	0.0629	0	0	0	0	0	0	0	0	0	0.0431	0	0	0	0.0008	0	0.0215	0.0345	0	0	0	0	0.0028	0.0126	0.0308	0	0	0.0117	0.0049	0.0313	0.0094	0	0	0.009	0	0	0	0	0.0768	0.0019	0	0.0229	0.0338	0.0235	0	0.0029
05CO041	0	0	0	0.0882	0	0	0	0	0	0	0	0	0.0082	0.0399	0	0	0.0118	0.0228	0.0055	0.0262	0.0114	0	0	0	0.0049	0.0011	0.0052	0.1033	0	0.0326	0.0466	0.0237	0.0393	0.0079	0	0.0029	0	0.014	0	0	0	0.0263	0	0	0.0085	0.116	0.0053	0	0
05CO044	0	0.0158	0	0.0957	0	0.0016	0	0	0	0	0	0	0	0	0	0	0.002	0	0.0002	0.05	0.0439	0	0	0	0.0248	0	0.0289	0.0198	0	0.4181	0	0	0	0.0098	0	0	0	0.0726	0	0	0	0.1064	0.0003	0	0	0.3376	0.0137	0	0
05CO045	0.0065	0	0	0.0426	0	0	0	0	0	0	0	0	0.0048	0.1044	0	0	0	0.0015	0.002	0	0.0209	0.0005	0.0072	0	0.0951	0.0015	0.009	0.0708	0	0.1405	0.04	0.0154	0.0645	0	0.0035	0.0143	0	0	0.0114	0.0462	0	0.0064	0.0066	0	0	0	0.0223	0	0
05CO048	0.0074	0	0	0.0417	0	0	0	0	0	0	0	0	0	0.0813	0	0	0	0.0182	0.0126	0.005	0.0243	0.0069	0.009	0	0.096	0	0.0234	0.0588	0	0.2097	0.0397	0.0173	0.0477	0	0	0.0035	0	0	0	0.0637	0	0	0.0014	0.002	0	0	0.0234	0.0186	0
05CO049	0.0013	0	0	0.1775	0	0.0026	0	0	0	0	0	0	0	0.029	0	0	0.0155	0.0037	0.0131	0	0.0357	0.0008	0	0.0271	0	0.0153	0.0117	0.0589	0	0.194	0.0097	0.0136	0.0179	0.0084	0.0047	0.0031	0.0247	0.0383	0	0.0099	0	0.0675	0.0005	0.0013	0	0.0889	0.0133	0	0
05CO050	0	0	0	0.1543	0	0	0	0	0	0	0	0	0.0083	0.0754	0	0	0.0033	0	0.0017	0	0.0213	0.0041	0	0	0	0.0034	0.005	0.1264	0	0.0705	0	0	0.0075	0.0018	0	0.0008	0.0003	0.0072	0	0.0039	0	0.0007	0	0	0.0861	0.0143	0.0178	0	0
05CO053	0	0	0	0.0251	0	0	0	0	0	0	0	0	0	0.1127	0	0	0.0002	0	0	0	0.021	0.0288	0	0.035	0.0116	0.0034	0.0147	0.1082	0	0.0525	0.0179	0.0064	0.0166	0	0.0016	0	0.0137	0	0	0	0	0.1678	0.0024	0.0009	0.0145	0.0004	0.0283	0.0055	0
05CO054	0	0	0	0.0179	0	0	0	0	0	0	0	0	0	0.0669	0	0	0	0	0.0049	0	0.0354	0.0008	0	0	0.0424	0.0034	0.0109	0.0973	0	0	0.0038	0.0052	0.0062	0.0044	0.0011	0	0.0112	0.0244	0	0	0	0.2719	0.0001	0.0016	0.0438	0.0159	0.0158	0	0
06CO001	0.0009	0	0	0.0839	0	0.0143	0	0	0	0	0	0	0	0.0467	0	0	0	0	0.0087	0.0082	0.0159	0	0.009	0	0.0728	0.0072	0.0019	0.0574	0	0.0592	0.0116	0.0028	0.0194	0.0076	0	0.0073	0	0.0328	0	0.0275	0	0.0273	0.0014	0	0.0472	0.0114	0.011	0	0
06CO002	0.0289	0.0663	0	0.0031	0	0.0034	0	0	0	0.0075	0	0	0	0.0198	0.026	0	0.0077	0.0109	0	0.0275	0.02	0	0.0723	0.027	0.0765	0.0002	0.0082	0.0102	0	0.3348	0.0445	0.0154	0.0684	0.007	0.0008	0.0047	0	0.0272	0.0145	0.0428	0	0.0013	0.0149	0	0	0.2258	0.0091	0.0038	0
09CO005	0.0022	0.017	0	0.0314	0	0.0186	0	0	0	0.0168	0	0	0	0.004	0	0	0.0033	0.0008	0.0032	0.0034	0.0186	0	0	0	0.039	0.0033	0.0077	0.0279	0	0.0336	0.0103	0.0167	0	0.0098	0.0008	0.0051	0	0.0344	0	0.0532	0	0.0939	0.0109	0	0.0047	0.0617	0.008	0.0046	0
09CO006	0.0268	0	0	0.066	0	0	0	0	0	0	0	0	0	0.0914	0	0	0	0.0193	0.0117	0	0.0127	0.0059	0.0265	0.0766	0.0497	0.0056	0.0035	0.0631	0	0.0092	0.0304	0.0159	0.027	0	0.0006	0.0096	0.0165	0	0.0004	0.0346	0	0.1328	0.0048	0.0068	0.0154	0	0.0202	0	0
09CO008	0	0.0044	0	0.0404	0	0.0005	0	0	0	0	0	0	0	0.0399	0	0	0	0	0.0058	0	0.008	0.0001	0	0.0456	0.0632	0.0079	0.0019	0.0423	0	0.2195	0.008	0	0.0412	0.0064	0.0027	0.0117	0.003	0.0218	0	0.0019	0	0.0416	0.0079	0.0032	0	0.1091	0.0068	0	0
09CO011	0	0	0	0.0314	0	0.0033	0	0	0.0014	0.0028	0	0	0	0.0245	0	0	0.0044	0	0.0091	0.0004	0.0281	0	0	0	0.0467	0.0005	0.0096	0.0464	0	0.1299	0.0084	0.0082	0.0042	0.0093	0.0041	0.0058	0.0045	0.0103	0	0.0038	0	0.039	0.0017	0	0.0106	0.0831	0.0193	0	0
09CO013	0	0.0456	0	0.0212	0	0	0	0	0	0	0	0	0	0.0267	0	0	0	0	0	0.0033	0.0135	0.0058	0	0	0.0541	0.0016	0.0005	0.07	0	0.2874	0	0	0	0.0043	0.0069	0.0003	0.011	0	0	0	0	0.2174	0.0008	0	0	0.169	0.007	0	0
09CO014	0	0.015	0.0198	0.0327	0	0.0085	0.003	0	0.0048	0.0036	0	0	0	0.0126	0	0	0.0196	0.0104	0.009	0.0052	0.0018	0.0019	0	0.0118	0.0778	0	0.001	0.003	0	0.2185	0.0448	0.012	0.0415	0.0082	0.0023	0.0078	0	0.0168	0.0184	0.0511	0	0.0261	0.0058	0	0	0.0443	0.011	0	0
09CO015	0	0	0	0.0991	0	0	0	0	0	0	0	0	0	0.0528	0	0	0	0.0086	0.0181	0.0016	0.008	0.0036	0	0.0025	0.1145	0.0071	0.004	0.0935	0	0.1367	0.019	0.012	0.0083	0.0029	0	0.0036	0	0	0	0.0069	0	0.0196	0.0012	0.0086	0	0.0231	0.0062	0	0
09CO018	0	0	0.0174	0	0	0	0	0	0	0	0.0056	0	0.0022	0.0949	0	0	0.0124	0.0311	0.0181	0.0411	0.0141	0.0167	0.0063	0.1505	0.0676	0	0.0114	0.0701	0	0.1812	0.0558	0.0275	0.056	0	0.0064	0.0092	0.0402	0	0.0243	0	0	0.1256	0.0105	0.0069	0	0	0.0269	0	0
09CO019	0	0	0	0	0	0	0	0.0026	0	0	0	0	0.005	0.089	0	0	0	0	0.0069	0	0.0156	0	0	0	0.0596	0	0.0064	0.055	0	0.096	0.0208	0	0.0164	0	0.0053	0.0028	0.0011	0	0	0.0347	0.0066	0.0062	0.0053	0	0.0138	0.0267	0.0231	0	0
09CO022	0	0	0	0.0602	0	0	0	0	0	0	0	0	0	0.0654	0	0	0.0035	0	0.0087	0	0.0289	0.0087	0	0.0001	0.0398	0.0052	0.0071	0.0607	0	0	0.0053	0.0024	0.0183	0.0011	0.0043	0	0.0026	0	0	0.0007	0	0.1158	0.0023	0	0.0394	0.141	0.0152	0	0
11CO005	0.0241	0.1356	0	0.0619	0	0	0	0	0	0	0	0	0	0.0162	0	0.0249	0.0215	0	0.0378	0.039	0.0322	0	0.0802	0.0792	0.1985	0.0137	0.0078	0	0	0.129	0.0193	0.0214	0.0183	0.0036	0.0113	0.0047	0	0.0464	0	0.0311	0	0.1498	0.0056	0	0	0.1224	0.0014	0	0
11CO007	0	0	0.0102	0.0671	0	0	0	0.0017	0	0	0	0	0.0016	0.0526	0	0	0.0399	0.0236	0.008	0	0.0078	0.0043	0	0.0494	0.0061	0.0032	0.0091	0.0743	0	0.0129	0.038	0.0094	0.0507	0.0013	0	0.0046	0.0095	0	0.0069	0.0654	0	0	0.0017	0.0007	0	0.0599	0.0134	0.0219	0
11CO008	0.0657	0.0611	0	0	0	0	0	0	0	0	0	0	0.0008	0.067	0	0	0	0.006	0.0103	0.0034	0.015	0	0.0921	0	0.1098	0	0.0113	0.0619	0	0.2514	0.0305	0	0.0987	0	0	0.003	0	0.0306	0.0166	0.0514	0	0	0.009	0	0	0.0216	0.0353	0.0103	0
11CO010	0.002	0.1035	0	0.0189	0	0.0119	0	0	0	0	0	0	0.0065	0.0149	0	0.0009	0	0	0.0089	0.0124	0.0235	0	0.0643	0	0.2077	0.0067	0.0081	0.0451	0	0.0979	0.0153	0.0117	0.0136	0.0052	0.0041	0.0035	0	0.0463	0	0.0371	0	0.0864	0.0034	0	0	0.1092	0.0087	0	0
11CO018	0	0.0875	0	0.113	0	0.0289	0	0	0	0	0	0	0	0	0	0	0.0039	0.0056	0.008	0.0427	0.0424	0	0	0	0	0.0056	0.0177	0	0	0.2732	0.0462	0.0233	0.054	0.0167	0.0069	0.0078	0	0.0689	0	0	0	0.0674	0.0002	0	0	0.2599	0.0114	0	0
11CO019	0	0.0107	0	0.0434	0	0.0341	0	0	0.0072	0	0	0	0	0.0058	0	0	0.0255	0.0015	0.0113	0.0113	0.0131	0	0	0	0.0917	0	0.0123	0.0047	0	0.6731	0.0393	0.0041	0.0789	0.0101	0.0061	0.014	0	0	0.0157	0	0	0.0399	0.0048	0	0	0.1949	0.0064	0.0026	0
11CO020	0	0.0298	0	0	0	0	0.0268	0	0	0	0	0	0	0.0358	0	0	0	0	0.0263	0	0.0236	0	0	0.0075	0.0887	0	0.011	0.015	0	0.2341	0.0062	0.003	0.0081	0	0	0.0085	0.0133	0.0094	0	0.0538	0	0.1662	0.0058	0	0	0.1048	0.0145	0.0112	0
11CO021	0	0.1486	0	0.0413	0	0.0058	0	0	0.0014	0	0	0	0	0	0	0	0.0151	0	0.0057	0.0344	0.0039	0	0	0	0.0786	0	0.0029	0	0	0.5755	0.0298	0.0069	0.044	0.0102	0.0077	0.0134	0	0.081	0.0117	0	0	0.045	0.0042	0	0	0.2353	0	0	0
11CO022	0	0.0304	0	0.0696	0	0.047	0	0	0	0	0	0	0.0086	0.0389	0	0	0	0.0024	0.0136	0.001	0.0098	0	0.0229	0	0.0719	0.007	0	0.0396	0	0.0317	0.0149	0.014	0.0112	0.0106	0.0075	0.0048	0.0059	0.0044	0	0.024	0	0.091	0.0029	0.0059	0	0.133	0.0082	0	0.0003
11CO027	0.0231	0.0337	0	0.0583	0	0	0	0	0	0	0	0	0.0031	0.1017	0	0	0.0055	0	0.0103	0	0.0117	0.0179	0.0138	0.0143	0.0981	0.0042	0.0039	0.0794	0	0.1685	0.015	0.0011	0.0362	0	0.0032	0.0007	0.0082	0	0	0.0774	0	0.0003	0.0075	0	0	0.0274	0.0133	0	0
11CO030	0	0.0527	0	0	0	0.0088	0	0	0	0	0	0	0.003	0.0384	0	0	0.0003	0.0089	0.0111	0.003	0.0133	0	0	0.0366	0.0921	0.0039	0.0075	0.0441	0	0.3335	0.0478	0	0.075	0.0007	0.0018	0.0049	0	0.0071	0.0094	0.0464	0	0.0213	0.0081	0	0	0.0764	0.0166	0.0039	0
11CO031	0	0	0.0005	0.052	0	0	0	0.0025	0	0	0.0118	0	0.0014	0.0614	0	0	0.0076	0.0179	0.0098	0.0016	0.0146	0.008	0.0035	0.0709	0.0728	0	0.0103	0.0567	0	0	0.0553	0.013	0.0703	0	0	0.025	0.0033	0	0.0174	0.0671	0	0	0.0065	0.0136	0	0	0.0486	0.0271	0
11CO032	0.0131	0.0363	0.0049	0.0347	0	0	0.0087	0	0	0	0	0	0	0.0381	0.0018	0	0.0003	0.0135	0.0136	0.008	0.0194	0.0011	0.0428	0.0485	0.0473	0.0066	0.0076	0.052	0	0.0823	0.0298	0.0134	0.028	0.0032	0.001	0.0042	0.0235	0.0222	0.0133	0.0465	0	0.0208	0.005	0.0054	0	0	0.0091	0	0
11CO033	0	0.1313	0.004	0	0	0	0	0	0.0001	0	0	0	0	0.0228	0	0	0.0062	0.0262	0.0159	0.0067	0.0085	0.0004	0	0.0243	0.0586	0.0062	0.0071	0.0186	0	0.3525	0.0986	0.019	0.1024	0.0125	0	0.0049	0.0029	0	0.0823	0.0371	0	0	0.0015	0.015	0	0.124	0.0173	0.0032	0
11CO036	0.0201	0.053	0	0.0734	0	0	0	0	0	0.0104	0.0098	0.0021	0.0184	0.0642	0	0.0043	0.0156	0.008	0.0085	0	0.0016	0	0.0017	0	0.0202	0.0008	0.004	0.0753	0	0.1792	0.0254	0.0041	0.0507	0.003	0	0.0015	0.0021	0.0061	0	0.0026	0	0.0153	0.0011	0	0.0136	0.0379	0.026	0	0
11CO037	0.023	0.044	0	0	0	0.0013	0	0	0	0	0	0	0.0079	0.0593	0	0	0.001	0.0023	0.0158	0	0.0051	0.0013	0.1017	0.0541	0.1809	0.002	0.0033	0.0715	0	0	0.0163	0.0061	0.0285	0	0.0002	0	0	0.001	0.002	0.0637	0	0	0.0121	0	0.0274	0.0155	0.0097	0.0077	0
11CO039	0.0057	0.0244	0	0.07	0	0	0	0	0	0	0	0	0.0048	0.109	0	0	0	0	0.0033	0	0.005	0.002	0.0203	0.0074	0.079	0.0035	0.004	0.1077	0	0.0201	0.0155	0	0.0276	0	0.0002	0	0	0	0	0.0856	0	0.0171	0.0098	0.0016	0.0035	0.009	0.0024	0	0
11CO042	0	0.0994	0	0.1405	0	0.0235	0	0	0	0	0	0	0	0.0118	0	0	0	0	0.0072	0.0368	0.0344	0	0.012	0	0.0728	0.0088	0.0066	0.0513	0	0.1646	0	0	0	0.0076	0.0047	0.0012	0	0.0246	0	0.0403	0	0.022	0.0016	0	0	0.099	0.0056	0	0
11CO043	0.0133	0.0008	0	0.0819	0	0.0477	0	0	0	0	0	0	0	0.0146	0	0	0	0	0.0057	0.011	0.0376	0	0.0208	0	0.0349	0.0051	0.0136	0.0586	0	0.0126	0	0	0.0097	0.0057	0.0036	0.0005	0	0.018	0	0.0068	0	0.104	0.0008	0	0.0176	0.161	0.0101	0	0
11CO044	0	0.0798	0.0062	0.0393	0	0.0135	0	0	0	0	0	0	0	0.018	0	0	0	0.0192	0.0176	0.0167	0.0069	0	0	0	0.0324	0.0001	0.0003	0.0435	0	0.2513	0.0272	0.0129	0.0282	0.0161	0.0087	0.0046	0.0154	0.0246	0.0043	0	0	0.246	0.0012	0	0	0.2398	0.0056	0	0
11CO045	0.0095	0.1042	0	0.049	0	0.0272	0	0	0	0	0	0	0	0	0	0	0.0358	0	0.0142	0.0254	0.018	0	0	0	0.0802	0	0.0148	0.0159	0	0.5249	0.0022	0.0012	0.0126	0.0085	0.0161	0.0022	0	0	0	0.0232	0	0.1235	0.0007	0	0	0.252	0.0055	0	0
11CO047	0	0.179	0	0.0649	0	0.0192	0	0	0	0	0	0	0	0.0195	0	0	0.0011	0	0.032	0.0069	0.0077	0	0	0	0.0691	0.0004	0.0043	0.0609	0	0.4247	0	0	0	0.0062	0.0088	0	0	0.0075	0	0	0	0.0727	0.0015	0	0	0.2685	0.0091	0	0
11CO048	0.0201	0.1533	0	0.0912	0	0.0142	0	0	0	0	0	0	0	0	0.0008	0	0.0243	0.0032	0.0567	0.0476	0.0018	0	0	0.0549	0.2158	0.0059	0.0021	0.0032	0	0.5157	0.0293	0.0165	0.0465	0.0071	0.0079	0.0089	0	0.0807	0	0.0146	0	0.0954	0.0047	0	0	0.2392	0	0	0
11CO052	0	0	0.0276	0.0199	0	0	0	0	0	0.0033	0	0	0.0074	0.0799	0	0	0.0203	0.0336	0	0	0.0085	0.001	0	0.0146	0.0346	0	0.0078	0.0628	0	0.29	0.1222	0.0402	0.0991	0	0.0019	0.0157	0.0071	0	0.0373	0.0272	0	0.1171	0.002	0	0	0.0362	0.0185	0.0001	0
11CO053	0.0021	0	0	0.0336	0	0	0	0	0	0	0	0	0.0075	0.0826	0	0	0	0	0.0017	0.0012	0.0096	0	0.0259	0	0.1175	0.0026	0.0031	0.0773	0	0.0968	0.0239	0.0202	0.0195	0.0039	0	0.0056	0.0007	0.0013	0	0.0689	0	0.0076	0.0053	0.0018	0	0.0437	0.0104	0.0055	0
11CO054	0	0	0.0208	0.0446	0	0.0153	0	0	0.0082	0.009	0	0	0.0037	0.0276	0	0	0	0.0023	0.0075	0.0039	0.0171	0	0	0	0.0269	0.0065	0.0075	0.0551	0	0.0404	0.0197	0.0036	0.0283	0.0153	0	0.0138	0	0	0.0117	0	0	0.0345	0.0014	0.017	0	0.153	0.0176	0	0.0143
11CO057	0.0008	0.0376	0	0.0476	0	0.0387	0	0	0	0	0	0	0	0.0143	0	0	0.0114	0.0123	0.0069	0.0109	0.0075	0	0	0	0.0501	0.0003	0.0053	0.02	0	0.2776	0.0195	0.0059	0.0207	0.0141	0.0096	0.005	0	0.0225	0.0024	0	0	0.0323	0.0034	0	0	0.2322	0.0092	0	0
11CO058	0.0247	0.0811	0	0.0281	0	0	0	0	0	0	0	0	0	0.0348	0	0	0	0	0.0223	0.0026	0.0234	0.0001	0.0002	0.0119	0.1632	0.0047	0.0104	0.0225	0	0.345	0.0217	0.0118	0.0265	0.0003	0.0122	0.0036	0	0.0393	0.005	0.0427	0	0.0514	0.0143	0.002	0	0.0335	0.0105	0	0
11CO061	0	0.0424	0.0302	0.0335	0	0	0	0.006	0	0	0.0268	0.0078	0.0034	0.0439	0	0	0.0688	0.0466	0.0234	0.006	0.0065	0.0078	0.0518	0.2053	0.0969	0	0.0076	0.0392	0	0.1532	0.0781	0.0278	0.0864	0	0.0013	0.0048	0.0038	0	0.0559	0.0485	0.0237	0	0.0094	0.0187	0	0	0.0377	0.0089	0
11CO062	0	0.1174	0	0	0	0	0	0	0	0	0	0	0	0.0197	0	0	0.0002	0.0004	0.0182	0.0047	0.0241	0.0013	0	0.008	0.0906	0.0022	0.0142	0.0339	0	0.3823	0.0181	0.0094	0.0225	0.0005	0.0085	0.006	0.0019	0.0555	0.0037	0.0342	0	0.1726	0.0019	0	0	0.1414	0.0169	0	0
11CO070	0.0536	0.04	0.0396	0	0	0	0	0.0006	0	0.0133	0.0058	0	0.0105	0.0487	0	0.0373	0.0202	0.0303	0	0	0.0037	0.0011	0.0655	0.0634	0.0312	0	0.0115	0.0431	0	0.1745	0.0811	0.0097	0.1004	0.0057	0	0.0028	0.0044	0.0085	0.0305	0.0004	0	0.0505	0.0021	0	0	0.0091	0.0135	0.0138	0
11CO072	0.0025	0.0479	0.0023	0.007	0	0.0225	0	0	0.004	0.0111	0	0	0	0.0185	0	0	0.0014	0.0021	0.0071	0.0112	0.0097	0	0.0396	0	0.0539	0.0031	0.0027	0.0516	0	0.0799	0.0313	0.0066	0.0332	0.0095	0.0044	0.0027	0	0.0036	0	0	0	0.0746	0.0037	0	0	0.2075	0.0072	0	0
11CO077	0.0526	0.0329	0	0	0	0.0033	0	0	0.0028	0	0	0	0.0023	0.0337	0.0208	0.0364	0.0109	0	0	0.0006	0.0031	0	0.1201	0.0825	0.1561	0	0.003	0.0177	0	0.4847	0.0086	0	0.0308	0.0007	0.0029	0.0111	0	0.0237	0	0.0363	0	0.0184	0.0161	0	0	0.0926	0.0141	0	0
11CO079	0	0.0595	0	0.0142	0	0	0	0	0	0	0	0	0	0.0021	0	0	0	0	0.0054	0.0273	0.0232	0	0.0025	0	0.0927	0.0036	0.0019	0.0291	0	0.1224	0	0	0	0.0109	0.0016	0.0029	0.0041	0.0376	0	0.0359	0	0.0852	0.003	0	0	0.1151	0.0099	0	0
14CO003	0	0.0269	0	0.1826	0	0.0062	0	0	0	0	0	0	0	0.0043	0	0	0.0154	0.0009	0.0057	0.0197	0.039	0	0	0	0	0.0046	0.0113	0.0237	0	0.1565	0	0.0057	0.0076	0.0158	0.0063	0.0061	0	0.0169	0	0	0	0.113	0	0	0	0.2586	0.0037	0	0
14CO005	0.003	0	0	0.0379	0	0.002	0	0	0	0	0	0	0	0.0712	0	0	0.0677	0.0019	0.017	0.004	0.0256	0.0011	0.0051	0.0146	0.0811	0.0059	0.0112	0.0785	0	0.2173	0.0355	0.0041	0.0557	0	0.0033	0.001	0.0087	0.0055	0.0031	0.0598	0	0.046	0.004	0.0007	0.014	0.0085	0.0129	0	0
15CO001	0	0.0832	0	0.0083	0	0	0.0401	0	0	0	0	0	0	0.0073	0.0006	0	0	0	0.0363	0.0364	0.0351	0	0.0073	0	0.1719	0.0015	0.0056	0.0225	0	0.1881	0	0	0.0146	0.0095	0.0123	0.0072	0	0.02	0	0.0359	0	0.202	0.005	0	0	0.1324	0.013	0	0
15CO002	0	0.0677	0	0.1003	0	0	0	0	0	0	0	0	0	0.0148	0.0074	0	0.0238	0.0091	0.0138	0	0.0102	0.0022	0	0.0647	0.1056	0.0004	0.0006	0.0679	0	0.4146	0.0343	0.0216	0.0149	0.0065	0.0019	0.002	0	0.0053	0	0.0112	0	0.0722	0.0031	0	0	0.14	0.0024	0	0
16CO002	0.0075	0.0412	0	0.1669	0	0.0135	0	0	0	0	0	0	0	0.0305	0	0.0044	0.0039	0	0.0039	0.0054	0.0544	0	0.0082	0	0.042	0.0084	0.0171	0.0421	0	0.0962	0.0054	0.005	0.0116	0.0121	0	0.0018	0	0.0345	0	0.0471	0	0	0.0149	0	0.0393	0.0225	0.0118	0.0054	0
16CO003	0.0112	0.0159	0	0	0	0	0	0	0	0	0	0	0.0006	0.0352	0	0	0	0.0231	0.0119	0.011	0.008	0	0.0784	0.1434	0.1221	0.0034	0.0045	0.039	0	0.3659	0.0463	0.0111	0.0727	0	0.0022	0.0183	0	0.0035	0.0212	0.053	0	0	0.01	0	0	0.006	0.0162	0.0155	0
16CO006	0.0024	0.0266	0	0.0046	0	0.0124	0	0	0	0	0	0	0.0154	0.0641	0	0	0	0	0.0009	0.0161	0.0248	0	0	0	0.0532	0.0032	0.0109	0.0812	0	0.2666	0.0241	0.0122	0.0524	0.0029	0.0023	0.001	0	0.013	0.0153	0.0295	0	0.0456	0.0027	0	0	0.1201	0.0161	0.0065	0
16CO011	0.0337	0.0579	0	0.0789	0	0.0059	0	0	0	0	0	0	0	0.022	0.0076	0	0.0032	0.0065	0.0129	0.0104	0.0222	0	0.0362	0.0859	0.1088	0.0063	0.0082	0.0162	0	0.2221	0.0299	0.0184	0.0289	0.0096	0.0023	0.0063	0	0.0358	0.0005	0.0359	0	0.0178	0.0041	0	0	0.0701	0.0115	0	0
20CO001	0.0208	0.0737	0.0028	0.025	0	0	0	0	0	0	0	0	0	0.0095	0.0052	0	0.0461	0.0192	0.0142	0.0226	0.0158	0	0.0186	0.0782	0.105	0	0.0175	0.0012	0	0.5996	0.0462	0.0095	0.057	0.0058	0	0.0232	0	0.0144	0.0378	0.0608	0	0	0.0115	0	0	0.0924	0.0039	0.013	0
20CO003	0.0096	0.0452	0.0399	0.019	0	0	0.0172	0.0097	0.0001	0.0291	0.0513	0.0205	0.0041	0.0454	0	0.0095	0.0219	0.0576	0.0081	0.0227	0	0.0003	0.1354	0.0992	0.1342	0	0	0.043	0	0	0.139	0.0486	0.1513	0.0016	0	0.0209	0.0031	0.0289	0.043	0.0962	0.0058	0	0.0164	0	0.0549	0.052	0.0086	0.0072	0
20CO004	0	0	0	0.0494	0	0.0002	0	0	0	0.0046	0	0	0.0056	0.0324	0	0	0	0	0	0.0224	0.0424	0	0	0	0.0515	0.0024	0.0174	0.0781	0	0.0763	0	0	0.0013	0.0158	0.0024	0.0007	0.0195	0	0	0.0091	0	0.0209	0.0019	0	0	0.031	0.0055	0	0.0629
20CO007	0.0004	0	0	0.0492	0	0	0	0	0	0	0	0	0	0.0721	0	0	0.0178	0	0	0	0.0169	0.0021	0	0.0946	0.0195	0	0.0062	0.0385	0	0.0238	0.0201	0.0118	0.0097	0.0016	0.0023	0.0151	0.0105	0	0	0.005	0	0.1192	0.0096	0.0009	0.0099	0	0.0147	0	0
21CO006	0.0211	0.0228	0	0.0985	0	0	0	0	0	0	0	0	0	0.0622	0	0	0.0251	0.0267	0.0177	0.0179	0.0071	0	0.0861	0.0782	0.1001	0.0045	0.0023	0.0498	0	0.1773	0.0534	0.0325	0.0441	0.0016	0	0.0086	0.0129	0.0054	0.018	0.0415	0	0.013	0.0046	0.0041	0	0.0317	0.0114	0	0
21CO007	0.0038	0	0	0.1589	0	0	0	0	0	0	0	0	0	0.049	0	0	0	0	0.0089	0	0.021	0	0.0088	0	0.0925	0.008	0.0108	0.059	0	0.0286	0.0123	0.0127	0.0232	0.003	0	0.0106	0.0023	0.0153	0	0.0208	0	0	0.0092	0	0.0261	0.0461	0.0112	0	0
22CO004	0.0019	0	0	0.0855	0	0	0	0	0	0	0	0	0	0.0451	0	0	0.0096	0.001	0.0076	0	0.0234	0	0	0	0.0273	0.0072	0.0061	0.0469	0	0	0.0203	0.0101	0.0203	0.0043	0.0018	0.0172	0.0086	0	0	0.0144	0	0.0532	0.0053	0.0003	0.0207	0	0.0209	0	0
22CO006	0.0277	0.0101	0.0021	0.1402	0	0	0	0	0	0	0.0152	0	0	0.0082	0	0	0.0161	0.0791	0.0637	0.0569	0.001	0	0.0116	0.2453	0.29	0.0105	0.0029	0	0	0.3381	0.1018	0.0367	0.0974	0	0.0018	0.0184	0	0.0176	0.0191	0.0417	0	0	0.0058	0	0	0.0973	0.006	0	0
27CO004	0	0.0823	0	0.0217	0	0.0098	0	0	0	0.0053	0	0	0.0022	0.0269	0	0	0.0165	0.0182	0.0078	0.0037	0.0211	0.0001	0	0.0695	0.0409	0	0.0114	0.0256	0	0.4286	0.0232	0.0031	0.0275	0.003	0	0	0	0.0085	0.0095	0.0319	0	0.029	0.0037	0	0	0.1214	0.01	0.0101	0
[truncated: 61 more columns]

## Sheet: Table S3g
Sample	Adipocytes	Astrocytes	B-cells	Basophils	CD4+ T-cells	CD4+ Tcm	CD4+ Tem	CD4+ memory T-cells	CD4+ naive T-cells	CD8+ T-cells	CD8+ Tcm	CD8+ Tem	CD8+ naive T-cells	CLP	CMP	Chondrocytes	Class-switched memory B-cells	DC	Endothelial cells	Eosinophils	Epithelial cells	Erythrocytes	Fibroblasts	GMP	HSC	Hepatocytes	Keratinocytes	MEP	MPP	MSC	Macrophages	Macrophages M1	Macrophages M2	Mast cells	Megakaryocytes	Melanocytes	Memory B-cells	Mesangial cells	Monocytes	Myocytes	NK cells	NKT	Neurons	Neutrophils	Osteoblast	Pericytes	Plasma cells	Platelets	Preadipocytes
01CO001	0	0	0	0.0262	0	0	0	0	0	0	0	0	0	0.0447	0	0	0.0328	0.0014	0.0403	0	0.0295	0.0045	0	0.0435	0.0627	0.0115	0.0117	0.0416	0	0	0.0054	0.0079	0.0028	0.0014	0.0112	0	0.0298	0.0191	0	0.007	0	0.2215	0.0086	0.0123	0	0.0803	0.0112	0	0
01CO005	0	0	0	0	0	0.0139	0	0	0	0	0	0	0	0.0346	0	0	0	0	0.0218	0.0066	0.0395	0	0	0	0.0556	0.0014	0.0092	0.0871	0	0.0199	0	0	0.018	0.0071	0.0139	0.0033	0.0178	0.0172	0	0.004	0	0.1276	0.0011	0	0.0289	0.1342	0.0071	0	0
01CO006	0.0155	0.0136	0.1206	0.0103	0	0	0.0071	0	0.0295	0.0148	0.0013	0	0	0.0134	0	0.0006	0.1562	0.0255	0.0389	0	0.0033	0	0.0453	0.1343	0.1055	0.0115	0	0.0095	0	0	0.0353	0.0246	0.043	0.0118	0.0233	0.0014	0.0574	0.0468	0.0211	0.0672	0	0.1342	0.0228	0	0	0	0.0249	0.0274	0.0199
01CO008	0	0	0.0048	0	0	0	0.0309	0	0	0	0	0	0	0.033	0.0024	0	0.0116	0	0.0065	0.0067	0.0313	0.0006	0	0.0034	0.0222	0	0.0087	0.0073	0	0.0546	0.0019	0.0006	0.0007	0.0091	0.0034	0.0069	0.0149	0	0	0.0286	0	0.1208	0.0092	0	0	0	0.0088	0.0155	0
01CO015	0	0	0	0.0837	0	0	0	0	0	0	0	0	0	0.096	0	0	0	0.0021	0.0133	0	0.0085	0.0075	0	0.0032	0.0818	0.0052	0.0029	0.0988	0	0.0712	0.0279	0.013	0.0323	0	0.0019	0.0093	0	0.0005	0	0.0056	0	0.0021	0.0039	0	0.0156	0.0409	0.0194	0	0
01CO019	0	0.0001	0	0.1134	0	0	0	0	0	0	0	0	0	0.0489	0	0	0	0	0.0124	0.0023	0.0231	0	0	0	0.05	0.0034	0.0056	0.0882	0	0.167	0.002	0.0012	0.0118	0.0026	0.0045	0	0.0043	0	0	0.0536	0	0.0223	0.0032	0	0	0.0787	0.0128	0	0
01CO022	0	0	0	0	0	0	0	0.0001	0	0	0	0	0	0.0747	0	0	0	0	0	0	0.028	0.0014	0	0	0	0	0.0146	0.0866	0	0.0561	0.0009	0	0	0	0	0.0007	0.0068	0.0018	0	0.0055	0	0.1162	0.0039	0	0.0125	0.0005	0.0255	0	0
05CO002	0.04	0.1663	0	0	0	0.0007	0	0	0	0	0	0	0	0	0	0	0	0	0.125	0.0233	0	0	0.0944	0.0126	0.3592	0	0	0	0	0.6867	0.0096	0	0.0271	0	0.0471	0.0085	0	0.0185	0	0.0506	0	0.0337	0.0282	0	0	0.2539	0	0.0016	0
05CO003	0	0.087	0	0.0373	0	0	0	0	0	0	0	0	0	0.0036	0	0	0.0032	0.0059	0.024	0.0134	0.0422	0	0	0	0	0.0023	0.0185	0.0166	0	0.1161	0.0213	0.0075	0.0265	0.0135	0.012	0.0053	0.0095	0.0367	0.0162	0	0	0.1522	0.0009	0.0105	0	0.216	0.0077	0	0
05CO006	0	0.0026	0.0065	0.0421	0	0	0.0121	0	0	0	0	0	0	0.0365	0	0	0	0.0031	0.0046	0.0033	0.0048	0.0011	0	0.0259	0.0112	0	0.0043	0.0276	0	0	0.0479	0.0086	0.095	0.0059	0	0.0067	0.0026	0.0111	0	0.0087	0	0.1212	0.0045	0.0006	0	0.0531	0.0186	0	0
05CO007	0	0.0299	0	0.0639	0	0.0006	0.0014	0	0	0	0	0	0	0.0214	0	0	0	0.0019	0.0704	0.0067	0.0527	0	0	0	0.0237	0.0008	0.0308	0.023	0	0.4719	0.0279	0.0084	0.0176	0.0081	0.0205	0	0	0.0472	0.0298	0	0	0.0326	0.0002	0.0112	0	0.2522	0.0251	0	0
05CO011	0	0.0141	0	0.1614	0	0.0121	0	0	0	0	0	0	0	0.0061	0	0	0	0	0.0075	0.0355	0.0323	0	0	0	0.1501	0.0059	0.0067	0.0353	0	0.1559	0	0	0	0.014	0	0.0044	0	0.0492	0	0.0018	0	0.0432	0.0036	0	0	0.1239	0.0022	0	0
05CO015	0	0.0201	0.0022	0.2186	0	0	0	0	0	0	0	0	0	0.0583	0	0	0.0344	0.0362	0.052	0.0197	0.0208	0.0082	0	0.0337	0.0264	0.0048	0.0024	0.0534	0	0.1893	0.051	0.0301	0.0435	0.007	0.0121	0.0015	0.0044	0.0347	0	0.0452	0	0	0.0007	0.0079	0	0.1142	0.0313	0	0
05CO020	0	0.0937	0	0.0153	0	0.0106	0	0	0	0	0	0	0	0.0053	0	0	0.0175	0.0034	0.0356	0.0158	0.0132	0.0031	0	0.006	0.0645	0.0022	0.0007	0.0244	0	0.2846	0.0045	0.0087	0	0.0129	0.0141	0.0035	0.0055	0.0263	0	0.0085	0	0.1814	0.0026	0	0	0.2279	0.003	0	0
05CO026	0	0.0413	0	0.0656	0	0	0	0	0	0	0	0	0	0.0347	0	0	0	0	0.0241	0	0.0251	0	0	0	0.1218	0.003	0.0055	0.0832	0	0.2727	0	0	0	0.0046	0.0075	0.0006	0	0.0136	0	0.0236	0	0.0376	0.0025	0	0	0.1524	0.0116	0	0
05CO028	0	0	0.0008	0.0606	0	0	0	0.0034	0	0	0.0009	0	0.0057	0.1265	0	0	0.026	0.0016	0.0009	0.0009	0.0125	0.0035	0	0.0785	0.0405	0	0.0075	0.0925	0	0	0.0247	0.0093	0.0533	0	0.0043	0	0.0124	0	0.0009	0.0225	0	0.0024	0.0056	0.0049	0.0196	0	0.0313	0.0047	0
05CO029	0	0	0.0215	0.0477	0	0	0	0.0021	0	0	0	0	0.0037	0.114	0	0	0.0486	0.0034	0.0044	0	0.019	0.007	0	0.0339	0.0492	0	0.005	0.083	0	0	0.0251	0.0085	0.029	0	0.0053	0	0.0393	0	0.0011	0.0185	0	0.1039	0.0083	0.0004	0.0255	0	0.038	0	0
05CO032	0.0148	0	0	0.0764	0	0	0	0	0	0	0	0	0	0.1001	0	0	0.0137	0.0476	0.0224	0	0.0003	0.0241	0.0037	0.0969	0.0453	0	0.0029	0.0832	0	0.1724	0.0555	0.0369	0.0508	0	0	0.0139	0.0134	0	0.0024	0.0227	0	0.1154	0.0103	0.0038	0	0	0.0471	0	0
05CO033	0.0265	0	0.0461	0.0076	0	0	0.0177	0.0073	0	0	0.0135	0	0	0.0499	0	0	0.1139	0.048	0.0176	0.0137	0.0066	0.006	0.0534	0.197	0.1413	0	0.0132	0.0171	0	0.4683	0.0853	0.0234	0.1119	0.0015	0.0007	0.01	0.0165	0.0122	0.0639	0.0553	0	0	0.01	0.0163	0	0.0178	0.0265	0.0021	0
05CO034	0.0042	0.0286	0	0.1252	0	0	0	0	0	0	0	0	0	0.0278	0.0149	0	0	0	0.0055	0.0011	0.0094	0.0015	0	0.0233	0.1315	0.0047	0.0051	0.0404	0	0.2853	0.016	0.0044	0.0379	0.0073	0	0.007	0	0.0208	0	0.0685	0	0	0.0118	0	0	0.073	0.0093	0	0
05CO035	0	0.0558	0	0.0603	0	0.0037	0	0	0.007	0	0	0	0	0.0001	0	0	0	0	0.0199	0.0117	0.0158	0	0	0	0.1585	0.0036	0.0041	0.0093	0	0.4769	0.0003	0.0012	0.008	0.0042	0.0076	0.005	0	0	0	0.0413	0	0.0546	0.0101	0	0	0.1436	0.0069	0	0
05CO037	0	0.045	0	0	0	0	0.0056	0	0	0	0	0	0	0.0147	0	0	0	0.0126	0	0	0.0154	0.0026	0	0	0.0884	0	0.0049	0.0478	0	0.5126	0.0327	0.006	0.0462	0.0004	0.0022	0.0183	0.0071	0.0351	0.0041	0	0	0.1167	0.0134	0	0	0.1937	0.0056	0	0
05CO039	0	0	0	0.0629	0	0	0	0	0	0	0	0	0	0.0431	0	0	0	0.0008	0	0.0215	0.0345	0	0	0	0	0.0028	0.0126	0.0308	0	0	0.0117	0.0049	0.0313	0.0094	0	0	0.009	0	0	0	0	0.0768	0.0019	0	0.0229	0.0338	0.0235	0	0.0029
05CO041	0	0	0	0.0882	0	0	0	0	0	0	0	0	0.0082	0.0399	0	0	0.0118	0.0228	0.0055	0.0262	0.0114	0	0	0	0.0049	0.0011	0.0052	0.1033	0	0.0326	0.0466	0.0237	0.0393	0.0079	0	0.0029	0	0.014	0	0	0	0.0263	0	0	0.0085	0.116	0.0053	0	0
05CO044	0	0.0158	0	0.0957	0	0.0016	0	0	0	0	0	0	0	0	0	0	0.002	0	0.0002	0.05	0.0439	0	0	0	0.0248	0	0.0289	0.0198	0	0.4181	0	0	0	0.0098	0	0	0	0.0726	0	0	0	0.1064	0.0003	0	0	0.3376	0.0137	0	0
05CO045	0.0065	0	0	0.0426	0	0	0	0	0	0	0	0	0.0048	0.1044	0	0	0	0.0015	0.002	0	0.0209	0.0005	0.0072	0	0.0951	0.0015	0.009	0.0708	0	0.1405	0.04	0.0154	0.0645	0	0.0035	0.0143	0	0	0.0114	0.0462	0	0.0064	0.0066	0	0	0	0.0223	0	0
05CO048	0.0074	0	0	0.0417	0	0	0	0	0	0	0	0	0	0.0813	0	0	0	0.0182	0.0126	0.005	0.0243	0.0069	0.009	0	0.096	0	0.0234	0.0588	0	0.2097	0.0397	0.0173	0.0477	0	0	0.0035	0	0	0	0.0637	0	0	0.0014	0.002	0	0	0.0234	0.0186	0
05CO049	0.0013	0	0	0.1775	0	0.0026	0	0	0	0	0	0	0	0.029	0	0	0.0155	0.0037	0.0131	0	0.0357	0.0008	0	0.0271	0	0.0153	0.0117	0.0589	0	0.194	0.0097	0.0136	0.0179	0.0084	0.0047	0.0031	0.0247	0.0383	0	0.0099	0	0.0675	0.0005	0.0013	0	0.0889	0.0133	0	0
05CO050	0	0	0	0.1543	0	0	0	0	0	0	0	0	0.0083	0.0754	0	0	0.0033	0	0.0017	0	0.0213	0.0041	0	0	0	0.0034	0.005	0.1264	0	0.0705	0	0	0.0075	0.0018	0	0.0008	0.0003	0.0072	0	0.0039	0	0.0007	0	0	0.0861	0.0143	0.0178	0	0
05CO053	0	0	0	0.0251	0	0	0	0	0	0	0	0	0	0.1127	0	0	0.0002	0	0	0	0.021	0.0288	0	0.035	0.0116	0.0034	0.0147	0.1082	0	0.0525	0.0179	0.0064	0.0166	0	0.0016	0	0.0137	0	0	0	0	0.1678	0.0024	0.0009	0.0145	0.0004	0.0283	0.0055	0
05CO054	0	0	0	0.0179	0	0	0	0	0	0	0	0	0	0.0669	0	0	0	0	0.0049	0	0.0354	0.0008	0	0	0.0424	0.0034	0.0109	0.0973	0	0	0.0038	0.0052	0.0062	0.0044	0.0011	0	0.0112	0.0244	0	0	0	0.2719	0.0001	0.0016	0.0438	0.0159	0.0158	0	0
06CO001	0.0009	0	0	0.0839	0	0.0143	0	0	0	0	0	0	0	0.0467	0	0	0	0	0.0087	0.0082	0.0159	0	0.009	0	0.0728	0.0072	0.0019	0.0574	0	0.0592	0.0116	0.0028	0.0194	0.0076	0	0.0073	0	0.0328	0	0.0275	0	0.0273	0.0014	0	0.0472	0.0114	0.011	0	0
06CO002	0.0289	0.0663	0	0.0031	0	0.0034	0	0	0	0.0075	0	0	0	0.0198	0.026	0	0.0077	0.0109	0	0.0275	0.02	0	0.0723	0.027	0.0765	0.0002	0.0082	0.0102	0	0.3348	0.0445	0.0154	0.0684	0.007	0.0008	0.0047	0	0.0272	0.0145	0.0428	0	0.0013	0.0149	0	0	0.2258	0.0091	0.0038	0
09CO005	0.0022	0.017	0	0.0314	0	0.0186	0	0	0	0.0168	0	0	0	0.004	0	0	0.0033	0.0008	0.0032	0.0034	0.0186	0	0	0	0.039	0.0033	0.0077	0.0279	0	0.0336	0.0103	0.0167	0	0.0098	0.0008	0.0051	0	0.0344	0	0.0532	0	0.0939	0.0109	0	0.0047	0.0617	0.008	0.0046	0
09CO006	0.0268	0	0	0.066	0	0	0	0	0	0	0	0	0	0.0914	0	0	0	0.0193	0.0117	0	0.0127	0.0059	0.0265	0.0766	0.0497	0.0056	0.0035	0.0631	0	0.0092	0.0304	0.0159	0.027	0	0.0006	0.0096	0.0165	0	0.0004	0.0346	0	0.1328	0.0048	0.0068	0.0154	0	0.0202	0	0
09CO008	0	0.0044	0	0.0404	0	0.0005	0	0	0	0	0	0	0	0.0399	0	0	0	0	0.0058	0	0.008	0.0001	0	0.0456	0.0632	0.0079	0.0019	0.0423	0	0.2195	0.008	0	0.0412	0.0064	0.0027	0.0117	0.003	0.0218	0	0.0019	0	0.0416	0.0079	0.0032	0	0.1091	0.0068	0	0
09CO011	0	0	0	0.0314	0	0.0033	0	0	0.0014	0.0028	0	0	0	0.0245	0	0	0.0044	0	0.0091	0.0004	0.0281	0	0	0	0.0467	0.0005	0.0096	0.0464	0	0.1299	0.0084	0.0082	0.0042	0.0093	0.0041	0.0058	0.0045	0.0103	0	0.0038	0	0.039	0.0017	0	0.0106	0.0831	0.0193	0	0
09CO013	0	0.0456	0	0.0212	0	0	0	0	0	0	0	0	0	0.0267	0	0	0	0	0	0.0033	0.0135	0.0058	0	0	0.0541	0.0016	0.0005	0.07	0	0.2874	0	0	0	0.0043	0.0069	0.0003	0.011	0	0	0	0	0.2174	0.0008	0	0	0.169	0.007	0	0
09CO014	0	0.015	0.0198	0.0327	0	0.0085	0.003	0	0.0048	0.0036	0	0	0	0.0126	0	0	0.0196	0.0104	0.009	0.0052	0.0018	0.0019	0	0.0118	0.0778	0	0.001	0.003	0	0.2185	0.0448	0.012	0.0415	0.0082	0.0023	0.0078	0	0.0168	0.0184	0.0511	0	0.0261	0.0058	0	0	0.0443	0.011	0	0
09CO015	0	0	0	0.0991	0	0	0	0	0	0	0	0	0	0.0528	0	0	0	0.0086	0.0181	0.0016	0.008	0.0036	0	0.0025	0.1145	0.0071	0.004	0.0935	0	0.1367	0.019	0.012	0.0083	0.0029	0	0.0036	0	0	0	0.0069	0	0.0196	0.0012	0.0086	0	0.0231	0.0062	0	0
09CO018	0	0	0.0174	0	0	0	0	0	0	0	0.0056	0	0.0022	0.0949	0	0	0.0124	0.0311	0.0181	0.0411	0.0141	0.0167	0.0063	0.1505	0.0676	0	0.0114	0.0701	0	0.1812	0.0558	0.0275	0.056	0	0.0064	0.0092	0.0402	0	0.0243	0	0	0.1256	0.0105	0.0069	0	0	0.0269	0	0
09CO019	0	0	0	0	0	0	0	0.0026	0	0	0	0	0.005	0.089	0	0	0	0	0.0069	0	0.0156	0	0	0	0.0596	0	0.0064	0.055	0	0.096	0.0208	0	0.0164	0	0.0053	0.0028	0.0011	0	0	0.0347	0.0066	0.0062	0.0053	0	0.0138	0.0267	0.0231	0	0
09CO022	0	0	0	0.0602	0	0	0	0	0	0	0	0	0	0.0654	0	0	0.0035	0	0.0087	0	0.0289	0.0087	0	0.0001	0.0398	0.0052	0.0071	0.0607	0	0	0.0053	0.0024	0.0183	0.0011	0.0043	0	0.0026	0	0	0.0007	0	0.1158	0.0023	0	0.0394	0.141	0.0152	0	0
11CO005	0.0241	0.1356	0	0.0619	0	0	0	0	0	0	0	0	0	0.0162	0	0.0249	0.0215	0	0.0378	0.039	0.0322	0	0.0802	0.0792	0.1985	0.0137	0.0078	0	0	0.129	0.0193	0.0214	0.0183	0.0036	0.0113	0.0047	0	0.0464	0	0.0311	0	0.1498	0.0056	0	0	0.1224	0.0014	0	0
11CO007	0	0	0.0102	0.0671	0	0	0	0.0017	0	0	0	0	0.0016	0.0526	0	0	0.0399	0.0236	0.008	0	0.0078	0.0043	0	0.0494	0.0061	0.0032	0.0091	0.0743	0	0.0129	0.038	0.0094	0.0507	0.0013	0	0.0046	0.0095	0	0.0069	0.0654	0	0	0.0017	0.0007	0	0.0599	0.0134	0.0219	0
11CO008	0.0657	0.0611	0	0	0	0	0	0	0	0	0	0	0.0008	0.067	0	0	0	0.006	0.0103	0.0034	0.015	0	0.0921	0	0.1098	0	0.0113	0.0619	0	0.2514	0.0305	0	0.0987	0	0	0.003	0	0.0306	0.0166	0.0514	0	0	0.009	0	0	0.0216	0.0353	0.0103	0
11CO010	0.002	0.1035	0	0.0189	0	0.0119	0	0	0	0	0	0	0.0065	0.0149	0	0.0009	0	0	0.0089	0.0124	0.0235	0	0.0643	0	0.2077	0.0067	0.0081	0.0451	0	0.0979	0.0153	0.0117	0.0136	0.0052	0.0041	0.0035	0	0.0463	0	0.0371	0	0.0864	0.0034	0	0	0.1092	0.0087	0	0
11CO018	0	0.0875	0	0.113	0	0.0289	0	0	0	0	0	0	0	0	0	0	0.0039	0.0056	0.008	0.0427	0.0424	0	0	0	0	0.0056	0.0177	0	0	0.2732	0.0462	0.0233	0.054	0.0167	0.0069	0.0078	0	0.0689	0	0	0	0.0674	0.0002	0	0	0.2599	0.0114	0	0
11CO019	0	0.0107	0	0.0434	0	0.0341	0	0	0.0072	0	0	0	0	0.0058	0	0	0.0255	0.0015	0.0113	0.0113	0.0131	0	0	0	0.0917	0	0.0123	0.0047	0	0.6731	0.0393	0.0041	0.0789	0.0101	0.0061	0.014	0	0	0.0157	0	0	0.0399	0.0048	0	0	0.1949	0.0064	0.0026	0
11CO020	0	0.0298	0	0	0	0	0.0268	0	0	0	0	0	0	0.0358	0	0	0	0	0.0263	0	0.0236	0	0	0.0075	0.0887	0	0.011	0.015	0	0.2341	0.0062	0.003	0.0081	0	0	0.0085	0.0133	0.0094	0	0.0538	0	0.1662	0.0058	0	0	0.1048	0.0145	0.0112	0
11CO021	0	0.1486	0	0.0413	0	0.0058	0	0	0.0014	0	0	0	0	0	0	0	0.0151	0	0.0057	0.0344	0.0039	0	0	0	0.0786	0	0.0029	0	0	0.5755	0.0298	0.0069	0.044	0.0102	0.0077	0.0134	0	0.081	0.0117	0	0	0.045	0.0042	0	0	0.2353	0	0	0
11CO022	0	0.0304	0	0.0696	0	0.047	0	0	0	0	0	0	0.0086	0.0389	0	0	0	0.0024	0.0136	0.001	0.0098	0	0.0229	0	0.0719	0.007	0	0.0396	0	0.0317	0.0149	0.014	0.0112	0.0106	0.0075	0.0048	0.0059	0.0044	0	0.024	0	0.091	0.0029	0.0059	0	0.133	0.0082	0	0.0003
11CO027	0.0231	0.0337	0	0.0583	0	0	0	0	0	0	0	0	0.0031	0.1017	0	0	0.0055	0	0.0103	0	0.0117	0.0179	0.0138	0.0143	0.0981	0.0042	0.0039	0.0794	0	0.1685	0.015	0.0011	0.0362	0	0.0032	0.0007	0.0082	0	0	0.0774	0	0.0003	0.0075	0	0	0.0274	0.0133	0	0
11CO030	0	0.0527	0	0	0	0.0088	0	0	0	0	0	0	0.003	0.0384	0	0	0.0003	0.0089	0.0111	0.003	0.0133	0	0	0.0366	0.0921	0.0039	0.0075	0.0441	0	0.3335	0.0478	0	0.075	0.0007	0.0018	0.0049	0	0.0071	0.0094	0.0464	0	0.0213	0.0081	0	0	0.0764	0.0166	0.0039	0
11CO031	0	0	0.0005	0.052	0	0	0	0.0025	0	0	0.0118	0	0.0014	0.0614	0	0	0.0076	0.0179	0.0098	0.0016	0.0146	0.008	0.0035	0.0709	0.0728	0	0.0103	0.0567	0	0	0.0553	0.013	0.0703	0	0	0.025	0.0033	0	0.0174	0.0671	0	0	0.0065	0.0136	0	0	0.0486	0.0271	0
11CO032	0.0131	0.0363	0.0049	0.0347	0	0	0.0087	0	0	0	0	0	0	0.0381	0.0018	0	0.0003	0.0135	0.0136	0.008	0.0194	0.0011	0.0428	0.0485	0.0473	0.0066	0.0076	0.052	0	0.0823	0.0298	0.0134	0.028	0.0032	0.001	0.0042	0.0235	0.0222	0.0133	0.0465	0	0.0208	0.005	0.0054	0	0	0.0091	0	0
11CO033	0	0.1313	0.004	0	0	0	0	0	0.0001	0	0	0	0	0.0228	0	0	0.0062	0.0262	0.0159	0.0067	0.0085	0.0004	0	0.0243	0.0586	0.0062	0.0071	0.0186	0	0.3525	0.0986	0.019	0.1024	0.0125	0	0.0049	0.0029	0	0.0823	0.0371	0	0	0.0015	0.015	0	0.124	0.0173	0.0032	0
11CO036	0.0201	0.053	0	0.0734	0	0	0	0	0	0.0104	0.0098	0.0021	0.0184	0.0642	0	0.0043	0.0156	0.008	0.0085	0	0.0016	0	0.0017	0	0.0202	0.0008	0.004	0.0753	0	0.1792	0.0254	0.0041	0.0507	0.003	0	0.0015	0.0021	0.0061	0	0.0026	0	0.0153	0.0011	0	0.0136	0.0379	0.026	0	0
11CO037	0.023	0.044	0	0	0	0.0013	0	0	0	0	0	0	0.0079	0.0593	0	0	0.001	0.0023	0.0158	0	0.0051	0.0013	0.1017	0.0541	0.1809	0.002	0.0033	0.0715	0	0	0.0163	0.0061	0.0285	0	0.0002	0	0	0.001	0.002	0.0637	0	0	0.0121	0	0.0274	0.0155	0.0097	0.0077	0
11CO039	0.0057	0.0244	0	0.07	0	0	0	0	0	0	0	0	0.0048	0.109	0	0	0	0	0.0033	0	0.005	0.002	0.0203	0.0074	0.079	0.0035	0.004	0.1077	0	0.0201	0.0155	0	0.0276	0	0.0002	0	0	0	0	0.0856	0	0.0171	0.0098	0.0016	0.0035	0.009	0.0024	0	0
11CO042	0	0.0994	0	0.1405	0	0.0235	0	0	0	0	0	0	0	0.0118	0	0	0	0	0.0072	0.0368	0.0344	0	0.012	0	0.0728	0.0088	0.0066	0.0513	0	0.1646	0	0	0	0.0076	0.0047	0.0012	0	0.0246	0	0.0403	0	0.022	0.0016	0	0	0.099	0.0056	0	0
11CO043	0.0133	0.0008	0	0.0819	0	0.0477	0	0	0	0	0	0	0	0.0146	0	0	0	0	0.0057	0.011	0.0376	0	0.0208	0	0.0349	0.0051	0.0136	0.0586	0	0.0126	0	0	0.0097	0.0057	0.0036	0.0005	0	0.018	0	0.0068	0	0.104	0.0008	0	0.0176	0.161	0.0101	0	0
11CO044	0	0.0798	0.0062	0.0393	0	0.0135	0	0	0	0	0	0	0	0.018	0	0	0	0.0192	0.0176	0.0167	0.0069	0	0	0	0.0324	0.0001	0.0003	0.0435	0	0.2513	0.0272	0.0129	0.0282	0.0161	0.0087	0.0046	0.0154	0.0246	0.0043	0	0	0.246	0.0012	0	0	0.2398	0.0056	0	0
11CO045	0.0095	0.1042	0	0.049	0	0.0272	0	0	0	0	0	0	0	0	0	0	0.0358	0	0.0142	0.0254	0.018	0	0	0	0.0802	0	0.0148	0.0159	0	0.5249	0.0022	0.0012	0.0126	0.0085	0.0161	0.0022	0	0	0	0.0232	0	0.1235	0.0007	0	0	0.252	0.0055	0	0
11CO047	0	0.179	0	0.0649	0	0.0192	0	0	0	0	0	0	0	0.0195	0	0	0.0011	0	0.032	0.0069	0.0077	0	0	0	0.0691	0.0004	0.0043	0.0609	0	0.4247	0	0	0	0.0062	0.0088	0	0	0.0075	0	0	0	0.0727	0.0015	0	0	0.2685	0.0091	0	0
11CO048	0.0201	0.1533	0	0.0912	0	0.0142	0	0	0	0	0	0	0	0	0.0008	0	0.0243	0.0032	0.0567	0.0476	0.0018	0	0	0.0549	0.2158	0.0059	0.0021	0.0032	0	0.5157	0.0293	0.0165	0.0465	0.0071	0.0079	0.0089	0	0.0807	0	0.0146	0	0.0954	0.0047	0	0	0.2392	0	0	0
11CO052	0	0	0.0276	0.0199	0	0	0	0	0	0.0033	0	0	0.0074	0.0799	0	0	0.0203	0.0336	0	0	0.0085	0.001	0	0.0146	0.0346	0	0.0078	0.0628	0	0.29	0.1222	0.0402	0.0991	0	0.0019	0.0157	0.0071	0	0.0373	0.0272	0	0.1171	0.002	0	0	0.0362	0.0185	0.0001	0
11CO053	0.0021	0	0	0.0336	0	0	0	0	0	0	0	0	0.0075	0.0826	0	0	0	0	0.0017	0.0012	0.0096	0	0.0259	0	0.1175	0.0026	0.0031	0.0773	0	0.0968	0.0239	0.0202	0.0195	0.0039	0	0.0056	0.0007	0.0013	0	0.0689	0	0.0076	0.0053	0.0018	0	0.0437	0.0104	0.0055	0
11CO054	0	0	0.0208	0.0446	0	0.0153	0	0	0.0082	0.009	0	0	0.0037	0.0276	0	0	0	0.0023	0.0075	0.0039	0.0171	0	0	0	0.0269	0.0065	0.0075	0.0551	0	0.0404	0.0197	0.0036	0.0283	0.0153	0	0.0138	0	0	0.0117	0	0	0.0345	0.0014	0.017	0	0.153	0.0176	0	0.0143
11CO057	0.0008	0.0376	0	0.0476	0	0.0387	0	0	0	0	0	0	0	0.0143	0	0	0.0114	0.0123	0.0069	0.0109	0.0075	0	0	0	0.0501	0.0003	0.0053	0.02	0	0.2776	0.0195	0.0059	0.0207	0.0141	0.0096	0.005	0	0.0225	0.0024	0	0	0.0323	0.0034	0	0	0.2322	0.0092	0	0
11CO058	0.0247	0.0811	0	0.0281	0	0	0	0	0	0	0	0	0	0.0348	0	0	0	0	0.0223	0.0026	0.0234	0.0001	0.0002	0.0119	0.1632	0.0047	0.0104	0.0225	0	0.345	0.0217	0.0118	0.0265	0.0003	0.0122	0.0036	0	0.0393	0.005	0.0427	0	0.0514	0.0143	0.002	0	0.0335	0.0105	0	0
11CO060	0	0	0	0.1128	0	0	0	0	0	0	0	0	0.0024	0.0598	0	0	0	0.0024	0.0149	0	0.0016	0	0	0	0.0719	0.004	0	0.0794	0	0.0258	0.0285	0.015	0.0336	0.0032	0.0011	0.0012	0	0.0006	0	0.0037	0	0	0.0035	0	0	0.1359	0.0089	0	0
11CO061	0	0.0424	0.0302	0.0335	0	0	0	0.006	0	0	0.0268	0.0078	0.0034	0.0439	0	0	0.0688	0.0466	0.0234	0.006	0.0065	0.0078	0.0518	0.2053	0.0969	0	0.0076	0.0392	0	0.1532	0.0781	0.0278	0.0864	0	0.0013	0.0048	0.0038	0	0.0559	0.0485	0.0237	0	0.0094	0.0187	0	0	0.0377	0.0089	0
11CO062	0	0.1174	0	0	0	0	0	0	0	0	0	0	0	0.0197	0	0	0.0002	0.0004	0.0182	0.0047	0.0241	0.0013	0	0.008	0.0906	0.0022	0.0142	0.0339	0	0.3823	0.0181	0.0094	0.0225	0.0005	0.0085	0.006	0.0019	0.0555	0.0037	0.0342	0	0.1726	0.0019	0	0	0.1414	0.0169	0	0
11CO070	0.0536	0.04	0.0396	0	0	0	0	0.0006	0	0.0133	0.0058	0	0.0105	0.0487	0	0.0373	0.0202	0.0303	0	0	0.0037	0.0011	0.0655	0.0634	0.0312	0	0.0115	0.0431	0	0.1745	0.0811	0.0097	0.1004	0.0057	0	0.0028	0.0044	0.0085	0.0305	0.0004	0	0.0505	0.0021	0	0	0.0091	0.0135	0.0138	0
11CO072	0.0025	0.0479	0.0023	0.007	0	0.0225	0	0	0.004	0.0111	0	0	0	0.0185	0	0	0.0014	0.0021	0.0071	0.0112	0.0097	0	0.0396	0	0.0539	0.0031	0.0027	0.0516	0	0.0799	0.0313	0.0066	0.0332	0.0095	0.0044	0.0027	0	0.0036	0	0	0	0.0746	0.0037	0	0	0.2075	0.0072	0	0
11CO077	0.0526	0.0329	0	0	0	0.0033	0	0	0.0028	0	0	0	0.0023	0.0337	0.0208	0.0364	0.0109	0	0	0.0006	0.0031	0	0.1201	0.0825	0.1561	0	0.003	0.0177	0	0.4847	0.0086	0	0.0308	0.0007	0.0029	0.0111	0	0.0237	0	0.0363	0	0.0184	0.0161	0	0	0.0926	0.0141	0	0
11CO079	0	0.0595	0	0.0142	0	0	0	0	0	0	0	0	0	0.0021	0	0	0	0	0.0054	0.0273	0.0232	0	0.0025	0	0.0927	0.0036	0.0019	0.0291	0	0.1224	0	0	0	0.0109	0.0016	0.0029	0.0041	0.0376	0	0.0359	0	0.0852	0.003	0	0	0.1151	0.0099	0	0
14CO002	0	0	0	0.0584	0	0	0	0.0004	0	0	0	0	0.014	0.105	0	0	0	0	0.0047	0	0.0219	0.0059	0	0	0.043	0	0.0125	0.1067	0	0.0565	0.0017	0	0.0089	0	0.0018	0.0016	0	0	0	0.0368	0	0.0086	0.0056	0.0074	0.0417	0	0.0185	0	0
14CO003	0	0.0269	0	0.1826	0	0.0062	0	0	0	0	0	0	0	0.0043	0	0	0.0154	0.0009	0.0057	0.0197	0.039	0	0	0	0	0.0046	0.0113	0.0237	0	0.1565	0	0.0057	0.0076	0.0158	0.0063	0.0061	0	0.0169	0	0	0	0.113	0	0	0	0.2586	0.0037	0	0
14CO005	0.003	0	0	0.0379	0	0.002	0	0	0	0	0	0	0	0.0712	0	0	0.0677	0.0019	0.017	0.004	0.0256	0.0011	0.0051	0.0146	0.0811	0.0059	0.0112	0.0785	0	0.2173	0.0355	0.0041	0.0557	0	0.0033	0.001	0.0087	0.0055	0.0031	0.0598	0	0.046	0.004	0.0007	0.014	0.0085	0.0129	0	0
15CO001	0	0.0832	0	0.0083	0	0	0.0401	0	0	0	0	0	0	0.0073	0.0006	0	0	0	0.0363	0.0364	0.0351	0	0.0073	0	0.1719	0.0015	0.0056	0.0225	0	0.1881	0	0	0.0146	0.0095	0.0123	0.0072	0	0.02	0	0.0359	0	0.202	0.005	0	0	0.1324	0.013	0	0
15CO002	0	0.0677	0	0.1003	0	0	0	0	0	0	0	0	0	0.0148	0.0074	0	0.0238	0.0091	0.0138	0	0.0102	0.0022	0	0.0647	0.1056	0.0004	0.0006	0.0679	0	0.4146	0.0343	0.0216	0.0149	0.0065	0.0019	0.002	0	0.0053	0	0.0112	0	0.0722	0.0031	0	0	0.14	0.0024	0	0
16CO002	0.0075	0.0412	0	0.1669	0	0.0135	0	0	0	0	0	0	0	0.0305	0	0.0044	0.0039	0	0.0039	0.0054	0.0544	0	0.0082	0	0.042	0.0084	0.0171	0.0421	0	0.0962	0.0054	0.005	0.0116	0.0121	0	0.0018	0	0.0345	0	0.0471	0	0	0.0149	0	0.0393	0.0225	0.0118	0.0054	0
16CO003	0.0112	0.0159	0	0	0	0	0	0	0	0	0	0	0.0006	0.0352	0	0	0	0.0231	0.0119	0.011	0.008	0	0.0784	0.1434	0.1221	0.0034	0.0045	0.039	0	0.3659	0.0463	0.0111	0.0727	0	0.0022	0.0183	0	0.0035	0.0212	0.053	0	0	0.01	0	0	0.006	0.0162	0.0155	0
16CO006	0.0024	0.0266	0	0.0046	0	0.0124	0	0	0	0	0	0	0.0154	0.0641	0	0	0	0	0.0009	0.0161	0.0248	0	0	0	0.0532	0.0032	0.0109	0.0812	0	0.2666	0.0241	0.0122	0.0524	0.0029	0.0023	0.001	0	0.013	0.0153	0.0295	0	0.0456	0.0027	0	0	0.1201	0.0161	0.0065	0
16CO011	0.0337	0.0579	0	0.0789	0	0.0059	0	0	0	0	0	0	0	0.022	0.0076	0	0.0032	0.0065	0.0129	0.0104	0.0222	0	0.0362	0.0859	0.1088	0.0063	0.0082	0.0162	0	0.2221	0.0299	0.0184	0.0289	0.0096	0.0023	0.0063	0	0.0358	0.0005	0.0359	0	0.0178	0.0041	0	0	0.0701	0.0115	0	0
20CO001	0.0208	0.0737	0.0028	0.025	0	0	0	0	0	0	0	0	0	0.0095	0.0052	0	0.0461	0.0192	0.0142	0.0226	0.0158	0	0.0186	0.0782	0.105	0	0.0175	0.0012	0	0.5996	0.0462	0.0095	0.057	0.0058	0	0.0232	0	0.0144	0.0378	0.0608	0	0	0.0115	0	0	0.0924	0.0039	0.013	0
20CO003	0.0096	0.0452	0.0399	0.019	0	0	0.0172	0.0097	0.0001	0.0291	0.0513	0.0205	0.0041	0.0454	0	0.0095	0.0219	0.0576	0.0081	0.0227	0	0.0003	0.1354	0.0992	0.1342	0	0	0.043	0	0	0.139	0.0486	0.1513	0.0016	0	0.0209	0.0031	0.0289	0.043	0.0962	0.0058	0	0.0164	0	0.0549	0.052	0.0086	0.0072	0
20CO004	0	0	0	0.0494	0	0.0002	0	0	0	0.0046	0	0	0.0056	0.0324	0	0	0	0	0	0.0224	0.0424	0	0	0	0.0515	0.0024	0.0174	0.0781	0	0.0763	0	0	0.0013	0.0158	0.0024	0.0007	0.0195	0	0	0.0091	0	0.0209	0.0019	0	0	0.031	0.0055	0	0.0629
20CO007	0.0004	0	0	0.0492	0	0	0	0	0	0	0	0	0	0.0721	0	0	0.0178	0	0	0	0.0169	0.0021	0	0.0946	0.0195	0	0.0062	0.0385	0	0.0238	0.0201	0.0118	0.0097	0.0016	0.0023	0.0151	0.0105	0	0	0.005	0	0.1192	0.0096	0.0009	0.0099	0	0.0147	0	0
21CO006	0.0211	0.0228	0	0.0985	0	0	0	0	0	0	0	0	0	0.0622	0	0	0.0251	0.0267	0.0177	0.0179	0.0071	0	0.0861	0.0782	0.1001	0.0045	0.0023	0.0498	0	0.1773	0.0534	0.0325	0.0441	0.0016	0	0.0086	0.0129	0.0054	0.018	0.0415	0	0.013	0.0046	0.0041	0	0.0317	0.0114	0	0
21CO007	0.0038	0	0	0.1589	0	0	0	0	0	0	0	0	0	0.049	0	0	0	0	0.0089	0	0.021	0	0.0088	0	0.0925	0.008	0.0108	0.059	0	0.0286	0.0123	0.0127	0.0232	0.003	0	0.0106	0.0023	0.0153	0	0.0208	0	0	0.0092	0	0.0261	0.0461	0.0112	0	0
22CO004	0.0019	0	0	0.0855	0	0	0	0	0	0	0	0	0	0.0451	0	0	0.0096	0.001	0.0076	0	0.0234	0	0	0	0.0273	0.0072	0.0061	0.0469	0	0	0.0203	0.0101	0.0203	0.0043	0.0018	0.0172	0.0086	0	0	0.0144	0	0.0532	0.0053	0.0003	0.0207	0	0.0209	0	0
22CO006	0.0277	0.0101	0.0021	0.1402	0	0	0	0	0	0	0.0152	0	0	0.0082	0	0	0.0161	0.0791	0.0637	0.0569	0.001	0	0.0116	0.2453	0.29	0.0105	0.0029	0	0	0.3381	0.1018	0.0367	0.0974	0	0.0018	0.0184	0	0.0176	0.0191	0.0417	0	0	0.0058	0	0	0.0973	0.006	0	0
27CO004	0	0.0823	0	0.0217	0	0.0098	0	0	0	0.0053	0	0	0.0022	0.0269	0	0	0.0165	0.0182	0.0078	0.0037	0.0211	0.0001	0	0.0695	0.0409	0	0.0114	0.0256	0	0.4286	0.0232	0.0031	0.0275	0.003	0	0	0	0.0085	0.0095	0.0319	0	0.029	0.0037	0	0	0.1214	0.01	0.0101	0
[truncated: 60 more columns]

## Sheet: Table S3h
gene	type	pvalue.w	pvalue.t	fdr	FC_mean	mean CI	mean CII	FC_median	median CI	median CII
ADORA2A	2014-TCGA COAD-seq_count	0.0162077	0.0162077	0.0629145	0.736286	79.8542	133.028	0.367033	55.6211	71.7344
ARG1	2014-TCGA COAD-seq_count	0.723532	0.723532	0.76656	0.303963	1.45294	1.7937	-0.0343103	0.9276	0.9058
BTLA	2014-TCGA COAD-seq_count	0.367386	0.367386	0.445682	0.244198	8.80052	10.4236	0.238359	5.3248	6.2814
C10orf54	2014-TCGA COAD-seq_count	0.0396892	0.0396892	0.112962	0.415133	727.066	969.485	0.39237	638.716	838.346
CD274	2014-TCGA COAD-seq_count	0.170269	0.170269	0.247058	0.432121	30.5181	41.1755	0.570002	15.5317	23.0572
CD276	2014-TCGA COAD-seq_count	0.111593	0.111593	0.194193	0.344509	2344.14	2976.39	0.0820014	2309.64	2444.72
CTLA4	2014-TCGA COAD-seq_count	0.0170039	0.0170039	0.0629145	0.772705	37.1688	63.5018	0.850206	25.8303	46.5658
EDNRB	2014-TCGA COAD-seq_count	0.260513	0.260513	0.332379	0.387946	121.511	159.001	0.190909	95.6316	109.162
HAVCR2	2014-TCGA COAD-seq_count	0.00880436	0.00880436	0.0501171	0.684482	131.914	212.002	0.781761	85.2441	146.554
IDO1	2014-TCGA COAD-seq_count	0.0575986	0.0575986	0.146976	0.797565	811.272	1410.12	0.653268	99.9097	157.131
IL10	2014-TCGA COAD-seq_count	0.00249781	0.00249781	0.0439876	0.918941	5.4606	10.3245	1.14519	3.5419	7.8338
IL13	2014-TCGA COAD-seq_count	0.112842	0.112842	0.194193	1.20207	1.32022	3.03743	Inf	0	1.0858
IL4	2014-TCGA COAD-seq_count	0.241729	0.241729	0.313823	1.17524	0.144322	0.325923	NA	0	0
KIR2DL1	2014-TCGA COAD-seq_count	0.331474	0.331474	0.415747	-0.235451	1.36548	1.15987	NA	0	0
KIR2DL3	2014-TCGA COAD-seq_count	0.387124	0.387124	0.462052	-0.470824	2.22967	1.60883	Inf	0	1.0627
LAG3	2014-TCGA COAD-seq_count	0.107692	0.107692	0.194193	-0.0457675	104.309	101.052	0.687687	40.1417	64.6562
PDCD1	2014-TCGA COAD-seq_count	0.0299127	0.0299127	0.0962407	0.26295	44.0655	52.8755	0.45372	23.8095	32.6087
SLAMF7	2014-TCGA COAD-seq_count	0.0184806	0.0184806	0.0651222	0.523441	221.526	318.416	0.483961	126.506	176.929
TGFB1	2014-TCGA COAD-seq_count	0.000335133	0.000335133	0.0247999	0.8144	909.142	1598.79	0.861619	706.452	1283.68
TIGIT	2014-TCGA COAD-seq_count	0.0809995	0.0809995	0.172883	0.169385	43.9978	49.479	0.624542	25.7732	39.7351
VEGFA	2014-TCGA COAD-seq_count	0.666663	0.666663	0.725486	0.118106	3682.94	3997.13	-0.127477	3640.15	3332.3
VEGFB	2014-TCGA COAD-seq_count	0.13973	0.13973	0.223735	0.198791	987.892	1133.84	0.249235	880.479	1046.52
VTCN1	2014-TCGA COAD-seq_count	0.195632	0.195632	0.264097	2.309	5.62867	27.8924	0.39641	1.0309	1.3569
BTN3A1	2014-TCGA COAD-seq_count	0.413635	0.413635	0.478266	-0.00203706	955.047	953.699	0.391722	656.626	861.467
BTN3A2	2014-TCGA COAD-seq_count	0.342432	0.342432	0.422333	-0.0276931	1160.15	1138.09	0.209955	930.992	1076.83
CCL5	2014-TCGA COAD-seq_count	0.135077	0.135077	0.223735	-0.285979	442.489	362.923	0.510036	178.581	254.315
CD27	2014-TCGA COAD-seq_count	0.0914555	0.0914555	0.182911	0.446979	88.4202	120.533	0.357003	60.4618	77.4372
CD28	2014-TCGA COAD-seq_count	0.106732	0.106732	0.194193	0.5006	22.9924	32.5296	0.507311	19.1083	27.1605
CD40	2014-TCGA COAD-seq_count	0.0817691	0.0817691	0.172883	0.431439	205.588	277.252	0.449216	129.906	177.36
CD40LG	2014-TCGA COAD-seq_count	0.898574	0.898574	0.910884	0.000479876	13.994	13.9986	0.00777482	12.8617	12.9312
CD70	2014-TCGA COAD-seq_count	0.196288	0.196288	0.264097	-0.967103	78.6828	40.2488	0.268451	16.3265	19.6655
CD80	2014-TCGA COAD-seq_count	0.0450256	0.0450256	0.123403	0.592639	16.566	24.9816	0.419978	13.8757	18.5644
CX3CL1	2014-TCGA COAD-seq_count	0.00372148	0.00372148	0.0439876	0.947269	486.124	937.353	0.888031	261.29	483.557
CXCL10	2014-TCGA COAD-seq_count	0.067487	0.067487	0.161098	0.643785	419.879	656.029	0.809016	173.196	303.442
CXCL9	2014-TCGA COAD-seq_count	0.142102	0.142102	0.223735	0.746002	495.804	831.532	1.00012	169.072	338.173
ENTPD1	2014-TCGA COAD-seq_count	0.084901	0.084901	0.174519	0.310462	706.172	875.727	0.0619323	728.325	760.271
GZMA	2014-TCGA COAD-seq_count	0.142102	0.142102	0.223735	-0.116907	125.29	115.538	0.17037	69.5733	78.2941
HMGB1	2014-TCGA COAD-seq_count	0.874277	0.874277	0.898562	-0.0148683	8132.52	8049.14	-0.0473546	8034.79	7775.34
ICAM1	2014-TCGA COAD-seq_count	0.167555	0.167555	0.247058	0.399894	1108.75	1462.9	0.256451	873.714	1043.68
ICOS	2014-TCGA COAD-seq_count	0.109622	0.109622	0.194193	0.432348	23.8083	32.1276	0.836156	17.2202	30.743
ICOSLG	2014-TCGA COAD-seq_count	0.167555	0.167555	0.247058	0.0433293	466.5	480.724	0.160248	341.737	381.884
IFNA1	2014-TCGA COAD-seq_count	0.965424	0.965424	0.965424	-0.0791734	0.180475	0.170837	NA	0	0
IFNG	2014-TCGA COAD-seq_count	0.824399	0.824399	0.859233	-0.397759	10.9897	8.34157	-0.398136	3.581	2.7174
IL12A	2014-TCGA COAD-seq_count	0.462598	0.462598	0.52665	-0.426251	12.9373	9.62788	-0.458019	8.8815	6.4656
IL1A	2014-TCGA COAD-seq_count	0.0957515	0.0957515	0.186463	1.3309	40.9292	102.962	0.685754	19.2118	30.903
IL1B	2014-TCGA COAD-seq_count	0.0141852	0.0141852	0.0583168	2.09099	313.59	1336.02	1.076	173.238	365.217
IL2	2014-TCGA COAD-seq_count	0.58426	0.58426	0.645302	-0.71833	0.236351	0.143654	NA	0	0
IL2RA	2014-TCGA COAD-seq_count	0.0380283	0.0380283	0.112564	0.609223	49.2248	75.0893	0.935703	28.4431	54.4066
ITGB2	2014-TCGA COAD-seq_count	0.00121689	0.00121689	0.0319183	0.994807	897.384	1788.32	0.77509	508.209	869.697
PRF1	2014-TCGA COAD-seq_count	0.0729322	0.0729322	0.168656	0.168441	177.396	199.365	0.629519	71.134	110.048
SELP	2014-TCGA COAD-seq_count	0.0116388	0.0116388	0.0519505	1.12826	33.9169	74.1406	0.824688	24.6002	43.5707
TLR4	2014-TCGA COAD-seq_count	0.579716	0.579716	0.645302	0.14564	457.612	506.22	0.0236424	308.401	313.496
TNF	2014-TCGA COAD-seq_count	0.0772477	0.0772477	0.172883	0.718334	19.9701	32.8564	0.34973	13.5301	17.2417
TNFRSF14	2014-TCGA COAD-seq_count	0.725124	0.725124	0.76656	0.0717879	2195.57	2307.59	-0.0861775	2141.83	2017.64
TNFRSF18	2014-TCGA COAD-seq_count	0.00975495	0.00975495	0.0515619	-0.149303	96.3838	86.9079	0.69475	44.2406	71.608
TNFRSF4	2014-TCGA COAD-seq_count	0.00696139	0.00696139	0.0501171	0.730663	77.4242	128.478	0.731396	62.1118	103.121
TNFRSF9	2014-TCGA COAD-seq_count	0.0655206	0.0655206	0.161098	0.613781	15.8168	24.2039	0.485461	10.2489	14.3488
TNFSF4	2014-TCGA COAD-seq_count	0.0113526	0.0113526	0.0519505	1.01301	44.4489	89.7032	0.670389	35.8423	57.0431
TNFSF9	2014-TCGA COAD-seq_count	0.15443	0.15443	0.23808	0.36488	225.856	290.852	0.455522	123.62	169.518
HLA-A	2014-TCGA COAD-seq_count	0.187313	0.187313	0.264097	0.0857219	50531.8	53625.3	0.290079	40446.8	49454.6
HLA-B	2014-TCGA COAD-seq_count	0.393839	0.393839	0.462605	0.00693097	52349.1	52601.2	0.448339	36762	50160.6
HLA-C	2014-TCGA COAD-seq_count	0.0279765	0.0279765	0.0941026	0.328898	38108.2	47866	0.53237	28921.6	41829.5
HLA-DPA1	2014-TCGA COAD-seq_count	0.00382721	0.00382721	0.0439876	0.601456	2935.54	4453.94	0.938304	1192.98	2286.08
HLA-DPB1	2014-TCGA COAD-seq_count	0.00129398	0.00129398	0.0319183	0.501723	2404.22	3404.14	0.99595	970.408	1935.38
HLA-DQA1	2014-TCGA COAD-seq_count	0.00660253	0.00660253	0.0501171	0.931646	977.646	1864.81	0.894271	485.798	902.939
HLA-DQA2	2014-TCGA COAD-seq_count	0.00642928	0.00642928	0.0501171	0.723099	353.495	583.522	0.610626	155.195	236.971
HLA-DQB1	2014-TCGA COAD-seq_count	0.0326726	0.0326726	0.100741	0.516571	1855.24	2654.02	1.01083	803.387	1618.88
HLA-DQB2	2014-TCGA COAD-seq_count	0.00416099	0.00416099	0.0439876	0.453885	184.57	252.809	0.674015	90.3226	144.11
HLA-DRA	2014-TCGA COAD-seq_count	0.00858004	0.00858004	0.0501171	0.495347	8409.39	11854.4	0.79626	4311.42	7487.19
HLA-DRB1	2014-TCGA COAD-seq_count	0.00793741	0.00793741	0.0501171	0.487598	5408.28	7582.99	1.19965	2397.73	5507.2
HLA-DRB5	2014-TCGA COAD-seq_count	0.0119346	0.0119346	0.0519505	0.555192	2104.24	3091.9	0.989503	939.687	1865.75
MICA	2014-TCGA COAD-seq_count	0.23189	0.23189	0.306427	-0.155622	388.685	348.94	-0.134179	371.615	338.611
MICB	2014-TCGA COAD-seq_count	0.196288	0.196288	0.264097	-0.482094	196.437	140.637	-0.419127	133.712	100
PDCD1LG2	2014-TCGA COAD-seq_count	0.0469409	0.0469409	0.124058	0.893911	22.2475	41.3405	0.548815	15.9902	23.3918
ADORA2A	2019 CPTAC CRC seq	0.272976	0.249291	0.6409	0.263958	6.2408	6.50476	0.1884	6.4263	6.6147
CD274	2019 CPTAC CRC seq	0.500502	0.531826	0.819003	0.143499	7.47706	7.62056	0.1719	7.375	7.5469
CD276	2019 CPTAC CRC seq	0.118644	0.0663231	0.457627	0.219351	10.0022	10.2215	0.3601	9.9218	10.2819
CTLA4	2019 CPTAC CRC seq	0.837147	0.947042	0.996963	0.015155	6.83323	6.84838	0.0255	6.8074	6.8329
EDNRB	2019 CPTAC CRC seq	0.329875	0.31679	0.664307	0.211737	8.45063	8.66236	0.021	8.4136	8.4346
HAVCR2	2019 CPTAC CRC seq	0.0545825	0.0827115	0.304681	0.302946	8.23962	8.54257	0.3229	8.224	8.5469
IDO1	2019 CPTAC CRC seq	0.84311	0.948337	0.996963	-0.0233291	8.84264	8.81931	-0.1438	8.858	8.7142
SLAMF7	2019 CPTAC CRC seq	0.996963	0.778337	0.996963	0.0664575	9.19181	9.25827	0.0845	9.3729	9.4574
TGFB1	2019 CPTAC CRC seq	0.000247037	0.000145749	0.01334	0.708636	8.37528	9.08391	0.6812	8.4009	9.0821
TIGIT	2019 CPTAC CRC seq	0.875989	0.753849	0.996963	0.0689874	7.28768	7.35666	0.0915	7.3923	7.4838
VEGFA	2019 CPTAC CRC seq	0.0846794	0.0833714	0.351745	-0.303224	12.0231	11.7199	-0.2665	11.9965	11.73
VEGFB	2019 CPTAC CRC seq	0.0135037	0.00310333	0.121533	0.301339	8.99493	9.29627	0.2653	9.0768	9.3421
BTN3A1	2019 CPTAC CRC seq	0.453377	0.638848	0.765074	-0.0663777	10.2557	10.1893	-0.1431	10.2503	10.1072
BTN3A2	2019 CPTAC CRC seq	0.232047	0.325926	0.61842	-0.142893	10.7715	10.6286	-0.2354	10.8194	10.584
CCL5	2019 CPTAC CRC seq	0.894024	0.667027	0.996963	0.117209	9.18931	9.30652	0.0157	9.3219	9.3376
CD27	2019 CPTAC CRC seq	0.324226	0.313295	0.664307	0.215583	6.67335	6.88893	0.4183	6.7814	7.1997
CD28	2019 CPTAC CRC seq	0.0626925	0.0430101	0.304681	0.369811	6.57081	6.94062	0.3888	6.5999	6.9887
CD40	2019 CPTAC CRC seq	0.245689	0.384536	0.61842	0.152477	7.74195	7.89442	0.3831	7.5999	7.983
CD70	2019 CPTAC CRC seq	0.0122284	0.0195106	0.121533	0.647288	4.24084	4.88813	0.737	4.1699	4.9069
CD80	2019 CPTAC CRC seq	0.555175	0.671608	0.881748	0.0764037	6.30399	6.3804	0.0704	6.3219	6.3923
CX3CL1	2019 CPTAC CRC seq	0.229058	0.258631	0.61842	0.244233	7.4571	7.70133	0.2895	7.4179	7.7074
CXCL10	2019 CPTAC CRC seq	0.251949	0.333868	0.61842	-0.338054	9.81804	9.47999	-0.4701	9.7532	9.2831
CXCL9	2019 CPTAC CRC seq	0.361002	0.476347	0.664307	-0.258231	10.707	10.4488	-0.7131	11.0112	10.2981
ENTPD1	2019 CPTAC CRC seq	0.00150216	0.00276218	0.0270389	0.30211	10.9275	11.2297	0.2514	10.9629	11.2143
GZMA	2019 CPTAC CRC seq	0.912109	0.800991	0.996963	0.0710926	7.61532	7.68642	-0.1535	7.7682	7.6147
HMGB1	2019 CPTAC CRC seq	0.0665766	0.0746223	0.304681	-0.18782	14.2847	14.0968	-0.1355	14.1667	14.0312
ICAM1	2019 CPTAC CRC seq	0.193027	0.215481	0.613143	0.222946	9.7002	9.92315	0.2313	9.6421	9.8734
ICOS	2019 CPTAC CRC seq	0.990889	0.944346	0.996963	0.0155287	6.31017	6.32569	0.0375	6.2479	6.2854
ICOSLG	2019 CPTAC CRC seq	0.972673	0.988819	0.996963	0.00200192	7.90103	7.90303	0.0552	7.8517	7.9069
IL1B	2019 CPTAC CRC seq	0.1535	0.139026	0.518062	0.490173	9.59028	10.0804	0.2157	9.5392	9.7549
IL2RA	2019 CPTAC CRC seq	0.286544	0.13918	0.644724	0.284682	7.52359	7.80827	-0.0148	7.6221	7.6073
ITGB2	2019 CPTAC CRC seq	0.0677068	0.0637087	0.304681	0.351573	9.63743	9.989	0.5243	9.5255	10.0498
PRF1	2019 CPTAC CRC seq	0.681005	0.772215	0.993899	-0.0659495	7.12862	7.06267	0.0424	7.0661	7.1085
SELP	2019 CPTAC CRC seq	0.000755529	0.00301193	0.0203993	0.67981	6.52833	7.20814	0.7862	6.6147	7.4009
TLR4	2019 CPTAC CRC seq	0.130785	0.0810285	0.470828	0.363142	10.1105	10.4737	0.1888	10.1331	10.3219
TNFRSF14	2019 CPTAC CRC seq	0.369059	0.216102	0.664307	-0.146302	10.2384	10.0921	-0.0745	10.196	10.1215
TNFRSF18	2019 CPTAC CRC seq	0.343192	0.289012	0.664307	0.214085	5.24827	5.46236	0.1884	5.4263	5.6147
TNFRSF4	2019 CPTAC CRC seq	0.0420816	0.0454434	0.284051	0.380425	5.49985	5.88027	0.3219	5.585	5.9069
TNFSF4	2019 CPTAC CRC seq	0.00902679	0.0475466	0.121533	0.421065	7.48743	7.90849	0.4808	7.4676	7.9484
TNFSF9	2019 CPTAC CRC seq	0.642332	0.817319	0.963498	0.0807734	5.98111	6.06188	0.2721	5.7279	6
HLA-A	2019 CPTAC CRC seq	0.754967	0.61229	0.996963	0.126896	13.301	13.4279	0.08	13.5779	13.6579
HLA-B	2019 CPTAC CRC seq	0.743425	0.832146	0.996963	0.0472888	14.3101	14.3573	0.2784	14.1255	14.4039
HLA-C	2019 CPTAC CRC seq	0.981781	0.975275	0.996963	-0.0107545	11.9366	11.9258	0.197	11.5575	11.7545
HLA-DPA1	2019 CPTAC CRC seq	0.433012	0.457816	0.754278	0.170789	12.6828	12.8536	0.0836	12.7584	12.842
HLA-DPB1	2019 CPTAC CRC seq	0.0186654	0.0986816	0.143991	0.367088	10.8615	11.2286	0.5307	10.8903	11.421
HLA-DQA1	2019 CPTAC CRC seq	0.831214	0.890239	0.996963	-0.092994	9.20022	9.10723	0.556	10.0861	10.6421
HLA-DQA2	2019 CPTAC CRC seq	0.612671	0.64874	0.945264	-0.24035	5.8119	5.57155	-0.1007	6.4757	6.375
HLA-DQB1	2019 CPTAC CRC seq	0.869991	0.926633	0.996963	-0.0727144	8.68372	8.61101	-0.2455	10.0512	9.8057
HLA-DRA	2019 CPTAC CRC seq	0.843111	0.893501	0.996963	0.0319095	13.3713	13.4032	0.06	13.29	13.35
HLA-DRB1	2019 CPTAC CRC seq	0.83716	0.959683	0.996963	-0.016844	10.8488	10.8319	0.1073	10.6493	10.7566
HLA-DRB5	2019 CPTAC CRC seq	0.924181	0.863228	0.996963	-0.141392	6.68682	6.54543	0.3401	6.3038	6.6439
MICA	2019 CPTAC CRC seq	0.356994	0.210062	0.664307	-0.282832	8.01598	7.73315	-0.2464	8.1948	7.9484
MICB	2019 CPTAC CRC seq	0.723343	0.849666	0.996963	-0.0388498	7.00791	6.96906	-0.1307	6.9887	6.858
PDCD1LG2	2019 CPTAC CRC seq	0.234988	0.270505	0.61842	0.259098	6.73959	6.99869	0.2721	6.7279	7

## Sheet: Table S4i
gene	type	pvalue.w	pvalue.t	fdr	FC_mean	mean CI	mean CII	FC_median	median CI	median CII	tendency
ARG1	2014 CPTAC-CRC Proteomics	0.513169	0.394559	0.564486	0.153427	0.325891	0.479318	0	0	0	Not
CD276	2014 CPTAC-CRC Proteomics	0.00264457	0.0120582	0.0193935	0.379305	1.02216	1.40147	0.558619	0.992387	1.55101	Not
IDO1	2014 CPTAC-CRC Proteomics	0.883458	0.544801	0.925527	-0.118766	0.43996	0.321194	0	0	0	Not
CD40	2014 CPTAC-CRC Proteomics	0.0127504	0.967347	0.056102	0.00156204	0.0277174	0.0292794	0	0	0	Not
CD70	2014 CPTAC-CRC Proteomics	8.42921e-06	0.000243337	9.27214e-05	0.522622	0.143053	0.665676	0.0374557	0	0.0374557	CII
ENTPD1	2014 CPTAC-CRC Proteomics	7.36541e-06	2.04045e-05	9.27214e-05	0.924255	1.39325	2.31751	1.44163	1.17834	2.61997	CII
GZMA	2014 CPTAC-CRC Proteomics	0.47276	0.825628	0.547407	0.0349382	1.73324	1.76818	0.131793	1.69224	1.82403	Not
HMGB1	2014 CPTAC-CRC Proteomics	0.0473923	0.0676277	0.115848	-0.215488	6.25994	6.04445	-0.227533	6.23911	6.01158	Not
ICAM1	2014 CPTAC-CRC Proteomics	0.187484	0.412618	0.294618	0.147517	2.56186	2.70938	0.242071	2.59002	2.83209	Not
ITGB2	2014 CPTAC-CRC Proteomics	0.0242954	0.0545325	0.0890831	0.426876	3.59367	4.02054	0.563129	3.50562	4.06875	Not
HLA-A	2014 CPTAC-CRC Proteomics	0.993939	0.891692	0.993939	0.0173974	5.45243	5.46983	-0.130892	5.48305	5.35216	Not
HLA-B	2014 CPTAC-CRC Proteomics	0.394858	0.419459	0.510992	0.107096	5.07568	5.18278	0.129097	5.09637	5.22546	Not
HLA-C	2014 CPTAC-CRC Proteomics	0.422866	0.907042	0.516836	-0.0157145	4.81503	4.79931	-0.0486145	4.80138	4.75276	Not
HLA-DPA1	2014 CPTAC-CRC Proteomics	0.0373554	0.130533	0.115848	0.295154	1.36822	1.66338	0.488224	1.48543	1.97365	Not
HLA-DPB1	2014 CPTAC-CRC Proteomics	0.0838487	0.0991713	0.167697	0.338506	1.3438	1.68231	0.525764	1.18503	1.7108	Not
HLA-DQA1	2014 CPTAC-CRC Proteomics	0.0044916	0.00466044	0.0247038	0.58009	2.35361	2.9337	0.546015	2.38143	2.92744	CII
HLA-DQB1	2014 CPTAC-CRC Proteomics	0.170657	0.137574	0.288805	0.382868	0.752127	1.13499	0.433658	0	0.433658	Not
HLA-DRA	2014 CPTAC-CRC Proteomics	0.0440988	0.120271	0.115848	0.255725	4.12118	4.3769	0.244298	4.06677	4.31107	Not
HLA-DRB1	2014 CPTAC-CRC Proteomics	0.101598	0.0526461	0.186263	0.465293	2.90667	3.37196	0.245779	3.05585	3.30163	Not
HLA-DRB3	2014 CPTAC-CRC Proteomics	0.0600477	0.159395	0.132105	0.337902	2.30896	2.64686	0.276873	2.29742	2.5743	Not
HLA-DRB4	2014 CPTAC-CRC Proteomics	0.212886	0.235696	0.312233	0.277161	1.39051	1.66767	0.368766	1.26303	1.6318	Not
HLA-DRB5	2014 CPTAC-CRC Proteomics	0.289254	0.166746	0.397724	0.288845	2.72159	3.01043	0.219567	2.82889	3.04846	Not
ARG1	2019 CPTAC-CRC_TMT	0.339049	0.265799	0.848606	-0.210419	0.0750714	-0.135348	-0.2296	0.0376	-0.192	Not
CD276	2019 CPTAC-CRC_TMT	0.587497	0.444537	0.848606	0.0600988	0.0203429	0.0804417	0.0541	0.0153	0.0694	Not
IDO1	2019 CPTAC-CRC_TMT	0.758059	0.827446	0.895888	NA	NA	NA	NA	NA	NA	Not
SLAMF7	2019 CPTAC-CRC_TMT	1	0.917497	1	NA	NA	NA	NA	NA	NA	Not
TGFB1	2019 CPTAC-CRC_TMT	0.180077	0.299693	0.848606	NA	NA	NA	NA	NA	NA	Not
CCL5	2019 CPTAC-CRC_TMT	0.412698	0.297892	0.848606	NA	NA	NA	NA	NA	NA	Not
CD27	2019 CPTAC-CRC_TMT	0.712787	0.479398	0.882498	NA	NA	NA	NA	NA	NA	Not
CD40	2019 CPTAC-CRC_TMT	0.545758	0.549157	0.848606	NA	NA	NA	NA	NA	NA	Not
CXCL10	2019 CPTAC-CRC_TMT	0.266667	0.494321	0.848606	NA	NA	NA	NA	NA	NA	Not
ENTPD1	2019 CPTAC-CRC_TMT	0.00165569	0.00046142	0.0430479	0.286909	-0.327082	-0.0401729	0.20795	-0.271	-0.06305	Not
GZMA	2019 CPTAC-CRC_TMT	0.366357	0.766567	0.848606	NA	NA	-0.508463	NA	NA	-0.494	Not
HMGB1	2019 CPTAC-CRC_TMT	0.0484487	0.0470396	0.419889	-0.132573	0.206373	0.0738	-0.18805	0.234	0.04595	Not
ICAM1	2019 CPTAC-CRC_TMT	0.551663	0.864831	0.848606	0.0161382	0.150935	0.167073	0.1265	0.0755	0.202	Not
ITGB2	2019 CPTAC-CRC_TMT	0.931001	0.968702	0.968241	-0.00517594	0.184955	0.179779	0.1055	0.132	0.2375	Not
HLA-A	2019 CPTAC-CRC_TMT	0.380665	0.523492	0.848606	0.079894	-0.0202878	0.0596062	0.1998	-0.0698	0.13	Not
HLA-B	2019 CPTAC-CRC_TMT	0.0230352	0.0709072	0.299457	-0.211221	0.132014	-0.0792063	-0.1694	0.0642	-0.1052	Not
HLA-C	2019 CPTAC-CRC_TMT	0.104489	0.146684	0.679178	-0.204003	0.113578	-0.090425	-0.1616	0.185	0.0234	Not
HLA-DPA1	2019 CPTAC-CRC_TMT	0.623675	0.241945	0.85345	-0.182267	-0.237698	-0.419965	-0.1435	-0.195	-0.3385	Not
HLA-DPB1	2019 CPTAC-CRC_TMT	0.571113	0.386643	0.848606	-0.102409	-0.0881224	-0.190531	0.0525	-0.16	-0.1075	Not
HLA-DQA1	2019 CPTAC-CRC_TMT	0.805507	0.956516	0.910573	NA	NA	NA	NA	NA	NA	Not
HLA-DQB1	2019 CPTAC-CRC_TMT	0.2439	0.402562	0.848606	0.148914	-0.155808	-0.00689375	0.2215	-0.26	-0.0385	Not
HLA-DRA	2019 CPTAC-CRC_TMT	0.549254	0.3834	0.848606	-0.108505	0.0173551	-0.09115	-0.0935	-0.0645	-0.158	Not
HLA-DRB1	2019 CPTAC-CRC_TMT	0.893809	0.964533	0.968241	0.00726276	-0.160588	-0.153325	0.0087	-0.164	-0.1553	Not
HLA-DRB3	2019 CPTAC-CRC_TMT	0.518804	0.582479	0.848606	NA	NA	NA	NA	NA	NA	Not
HLA-DRB4	2019 CPTAC-CRC_TMT	0.291576	0.431023	0.848606	NA	NA	NA	NA	NA	NA	Not
HLA-DRB5	2019 CPTAC-CRC_TMT	0.682152	0.504267	0.882498	NA	NA	NA	NA	NA	NA	Not
ENTPD1	2019 CPTAC-CRC Label free	0.00801033	0.0219571	0.0801033	0.457924	1.54612	2.1237	0.475168	1.73473	2.41141	Not
HMGB1	2019 CPTAC-CRC Label free	0.018757	0.0189736	0.093785	-0.0723693	5.70197	5.423	-0.0784422	5.78317	5.47713	Not
ICAM1	2019 CPTAC-CRC Label free	0.614141	0.821501	0.84571	0.0244438	2.62798	2.67288	0.0796758	2.61377	2.76218	Not
ITGB2	2019 CPTAC-CRC Label free	0.761139	0.375136	0.84571	-0.0821662	4.25646	4.02082	0.00474901	4.24074	4.25472	Not
HLA-A	2019 CPTAC-CRC Label free	0.716381	0.626222	0.84571	-0.0434167	3.73286	3.6222	-0.0473684	3.7659	3.64426	Not
HLA-B	2019 CPTAC-CRC Label free	0.0895325	0.218115	0.298442	0.120759	2.95309	3.21092	0.248292	2.92356	3.4726	Not
HLA-C	2019 CPTAC-CRC Label free	0.377615	0.379856	0.75523	-0.0657252	3.39517	3.24397	-0.0618658	3.47363	3.32782	Not
HLA-DPB1	2019 CPTAC-CRC Label free	0.585578	0.634043	0.84571	0.115232	1.29239	1.39985	0.157597	1.40923	1.5719	Not
HLA-DQB1	2019 CPTAC-CRC Label free	0.218371	0.245973	0.545928	0.25262	1.49724	1.78377	0.333304	1.49174	1.87943	Not
HLA-DRA	2019 CPTAC-CRC Label free	0.952702	0.746515	0.952702	0.0214394	3.63616	3.6906	0.0418884	3.63423	3.74129	Not
