# Supplementary material for: The Association of R-Loop Binding Proteins Subtypes with CIN Implicates Therapeutic Strategies in Colorectal Cancer
Source: Cancers (Basel). 2022 Nov 15;14(22):5607. doi: 10.3390/cancers14225607 (PMC9688457; doi:10.3390/cancers14225607)
Supplement: Supplementary file 1 [file cancers-14-05607-s001.zip › Table S4.xlsx]

## Sheet: Description
Table S4: 42 RLBPs are highly expressed in colorectal tumors. Related to Figure 1 and S1.
Sheet	Description
Table S4a	A list of 42 RLBPs.
Table S4b	42 RLBPs protein expression in 2014 CPTAC or 2019 CPTAC CRC proteomic data (P＜0.05,fc＞0.5).
Table S4c	204 RLBPs proteins expression in 2014 CPTAC or 2019 CPTAC colon cancer , Clear Cell Renal Cell Carcinoma,Lung adenocarcinoma,Ovarian Cancer,Head-and-neck squamous cell carcinoma,liver cancer proteomic database.
Table S4d	204 RLBPs proteins somatic copy number alterations (CNAs), mRNA, protein, and DNA methylation correlated with protein in CCLE database.
Table S4e	42 RLBPs proteins somatic copy number alterations (CNAs), mRNA, protein, and DNA methylation correlated with protein in TCGA database and CCLE database.

## Sheet: Table S4a
DDX18
DDX21
DKC1
EIF4A1
EMG1
FBL
GNL3
GTPBP4
HEATR1
HNRNPA1
IGF2BP3
ILF3
LYAR
MCM3
MCM5
MKI67
MYBBP1A
NAT10
NOL6
NONO
NOP2
NOP56
NPM1
PABPC1
PDCD11
PGAM5
PRKDC
PWP2
RALY
RBMX
RCC2
SMARCA5
SRPK1
SSRP1
STAU1
SUPT16H
SYNCRIP
TOP1
U2AF1
WDR36
XRN2
ZC3H15

## Sheet: Table S4b
gene	pvalue	fdr	fcSR1	meanT	meanN	fcSR2	medianT	medianN	type	pvalue	fdr	fcSR1	meanT	meanN	fcSR2	medianT	medianN	type
DDX18	7.40765e-14	2.43947e-13	1.05678	3.59631	2.53954	1.06795	3.68182	2.61387	2014 CPTAC CRC	5.8852e-49	5.16042e-47	0.868846	0.300246	-0.5686	0.8455	0.268	-0.5775	2019 CPTAC CRC
DDX21	1.23479e-42	2.96191e-41	2.61881	4.61019	1.99138	2.61859	4.66851	2.04992	2014 CPTAC CRC	3.28312e-56	7.56712e-54	1.1294	0.342347	-0.78705	1.119	0.36	-0.759	2019 CPTAC CRC
DKC1	1.57164e-71	2.33734e-69	3.56053	3.69736	0.13683	3.72565	3.73044	0.00479302	2014 CPTAC CRC	4.47723e-42	1.67212e-40	0.635736	0.231251	-0.404485	0.6135	0.202	-0.4115	2019 CPTAC CRC
EIF4A1	8.58502e-29	7.59979e-28	1.61109	6.04797	4.43688	1.7505	6.07457	4.32406	2014 CPTAC CRC	5.98977e-24	4.91051e-23	0.508728	0.215161	-0.293567	0.4575	0.186	-0.2715	2019 CPTAC CRC
EMG1	1.08777e-06	2.15927e-06	0.636502	1.94872	1.31222	0.585488	2.01434	1.42885	2014 CPTAC CRC	4.15744e-34	7.41992e-33	0.70483	0.226665	-0.478165	0.724	0.238	-0.486	2019 CPTAC CRC
FBL	6.34968e-10	1.61921e-09	0.627398	4.51732	3.88992	0.574241	4.5245	3.95026	2014 CPTAC CRC	5.63286e-43	2.40425e-41	0.625541	0.239384	-0.386157	0.5745	0.198	-0.3765	2019 CPTAC CRC
GNL3	1.47462e-26	1.1076e-25	1.82307	2.29209	0.469018	1.85794	2.36549	0.507543	2014 CPTAC CRC	3.94861e-53	5.89878e-51	0.79943	0.283594	-0.515836	0.7825	0.258	-0.5245	2019 CPTAC CRC
GTPBP4	2.50982e-11	7.05864e-11	1.22967	2.77054	1.54086	1.29047	2.85664	1.56617	2014 CPTAC CRC	4.39402e-57	1.36333e-54	0.818665	0.296952	-0.521713	0.8255	0.289	-0.5365	2019 CPTAC CRC
HEATR1	5.31815e-21	2.781e-20	1.94986	3.17448	1.22463	1.98888	3.28614	1.29726	2014 CPTAC CRC	2.14398e-41	7.48721e-40	0.53766	0.220577	-0.317083	0.5145	0.207	-0.3075	2019 CPTAC CRC
HNRNPA1	1.44555e-17	6.14236e-17	1.30142	6.39206	5.09064	1.11249	6.33038	5.21789	2014 CPTAC CRC	1.47369e-35	3.01732e-34	0.668391	0.227862	-0.440529	0.6425	0.204	-0.4385	2019 CPTAC CRC
IGF2BP3	3.36448e-07	6.94181e-07	0.834203	1.71095	0.876745	0.612331	1.56071	0.948383	2014 CPTAC CRC	8.27135e-13	3.50446e-12	0.91261	0.193248	-0.719362	0.927	0.294	-0.633	2019 CPTAC CRC
ILF3	7.99592e-25	5.26174e-24	3.8376	5.80919	1.97159	3.79957	5.82415	2.02459	2014 CPTAC CRC	4.33384e-50	4.66148e-48	0.536041	0.240804	-0.295237	0.5465	0.235	-0.3115	2019 CPTAC CRC
LYAR	2.49483e-16	9.80526e-16	1.04381	1.288	0.244196	1.33363	1.37109	0.0374666	2014 CPTAC CRC	1.54276e-43	7.22751e-42	0.786931	0.287346	-0.499585	0.789	0.29	-0.499	2019 CPTAC CRC
MCM3	2.30969e-26	1.69378e-25	2.56062	3.3363	0.775688	2.83373	3.53124	0.697517	2014 CPTAC CRC	5.58379e-26	5.28691e-25	0.713179	0.212141	-0.501038	0.7335	0.22	-0.5135	2019 CPTAC CRC
MCM5	2.2781e-09	5.53956e-09	1.19667	3.40021	2.20354	1.04359	3.51475	2.47116	2014 CPTAC CRC	2.48057e-24	2.08445e-23	0.667624	0.194776	-0.472848	0.623	0.185	-0.438	2019 CPTAC CRC
MKI67	5.20259e-22	2.8957e-21	1.79169	1.86845	0.0767526	1.82422	1.82901	0.00479302	2014 CPTAC CRC	6.50033e-31	8.78362e-30	0.919652	0.244004	-0.675648	0.8585	0.165	-0.6935	2019 CPTAC CRC
MYBBP1A	1.97268e-16	7.82755e-16	2.11185	4.10475	1.9929	2.13668	4.29388	2.1572	2014 CPTAC CRC	4.03274e-45	2.1688e-43	0.752515	0.258119	-0.494396	0.7195	0.221	-0.4985	2019 CPTAC CRC
NAT10	7.19277e-60	4.86231e-58	3.15819	3.21722	0.0590228	3.27663	3.28142	0.00479302	2014 CPTAC CRC	3.76186e-52	5.20781e-50	0.700638	0.255385	-0.445253	0.6705	0.251	-0.4195	2019 CPTAC CRC
NOL6	1.19311e-37	2.14299e-36	2.02854	2.05541	0.026864	2.30215	2.30694	0.00479302	2014 CPTAC CRC	2.15583e-37	5.07029e-36	0.554567	0.205067	-0.3495	0.5765	0.185	-0.3915	2019 CPTAC CRC
NONO	3.60613e-18	1.57551e-17	3.19118	4.99119	1.80002	3.13522	5.01123	1.876	2014 CPTAC CRC	1.56706e-55	3.16037e-53	0.584089	0.22954	-0.354549	0.5805	0.218	-0.3625	2019 CPTAC CRC
NOP2	4.25117e-16	1.63791e-15	1.90049	3.37919	1.4787	2.00281	3.50441	1.5016	2014 CPTAC CRC	3.6731e-57	1.18524e-54	0.815787	0.292777	-0.52301	0.785	0.272	-0.513	2019 CPTAC CRC
NOP56	1.26317e-08	2.92797e-08	0.718089	4.7122	3.99411	0.630152	4.73037	4.10021	2014 CPTAC CRC	1.79752e-44	9.11987e-43	0.654076	0.244896	-0.40918	0.609	0.208	-0.401	2019 CPTAC CRC
NPM1	1.47721e-59	9.46942e-58	5.38187	5.50079	0.118918	5.44883	5.45362	0.00479302	2014 CPTAC CRC	2.92662e-45	1.60606e-43	0.920702	0.238132	-0.68257	0.978	0.251	-0.727	2019 CPTAC CRC
PABPC1	3.40853e-14	1.14687e-13	0.566895	5.53104	4.96415	0.611163	5.57632	4.96516	2014 CPTAC CRC	3.73289e-41	1.2706e-39	0.529958	0.229168	-0.30079	0.5085	0.211	-0.2975	2019 CPTAC CRC
PDCD11	5.65012e-28	4.73134e-27	2.33775	3.39164	1.05389	2.39619	3.34972	0.95353	2014 CPTAC CRC	4.31747e-51	5.19837e-49	0.638029	0.242208	-0.395821	0.6055	0.215	-0.3905	2019 CPTAC CRC
PGAM5	4.41514e-47	1.51995e-45	2.43044	2.50223	0.0717835	2.58655	2.59135	0.00479302	2014 CPTAC CRC	1.22826e-31	1.74137e-30	0.602976	0.205676	-0.3973	0.5935	0.172	-0.4215	2019 CPTAC CRC
PRKDC	7.10312e-31	7.23545e-30	5.42256	7.21324	1.79069	5.30389	7.20611	1.90222	2014 CPTAC CRC	3.99244e-41	1.3495e-39	0.623003	0.245372	-0.377631	0.647	0.265	-0.382	2019 CPTAC CRC
PWP2	3.58392e-13	1.12447e-12	1.148	1.76702	0.619016	1.18198	1.82781	0.645834	2014 CPTAC CRC	1.20535e-36	2.69351e-35	0.589925	0.250833	-0.339092	0.5865	0.237	-0.3495	2019 CPTAC CRC
RALY	1.35745e-75	2.40333e-73	4.12419	4.24669	0.122505	4.24186	4.24666	0.00479302	2014 CPTAC CRC	3.56099e-28	3.92438e-27	0.652031	0.2215	-0.430531	0.662	0.232	-0.43	2019 CPTAC CRC
RBMX	2.97224e-16	1.15958e-15	1.04621	5.08597	4.03976	1.09975	5.17924	4.07949	2014 CPTAC CRC	2.72089e-31	3.77787e-30	0.543056	0.189466	-0.35359	0.5635	0.203	-0.3605	2019 CPTAC CRC
RCC2	3.76971e-06	7.10739e-06	0.589958	4.04684	3.45688	0.488614	4.10642	3.61781	2014 CPTAC CRC	9.09946e-43	3.74517e-41	0.710813	0.237743	-0.47307	0.7485	0.243	-0.5055	2019 CPTAC CRC
SMARCA5	2.50846e-07	5.24254e-07	1.02169	3.74611	2.72442	0.882304	3.84187	2.95956	2014 CPTAC CRC	1.48283e-46	9.06213e-45	0.552577	0.237812	-0.314765	0.5325	0.242	-0.2905	2019 CPTAC CRC
SRPK1	3.54678e-14	1.19231e-13	1.28357	1.86998	0.58641	1.42323	2.09423	0.670994	2014 CPTAC CRC	9.07674e-30	1.13172e-28	0.587138	0.178392	-0.408746	0.5145	0.13	-0.3845	2019 CPTAC CRC
SSRP1	1.7991e-07	3.79413e-07	0.936526	3.71822	2.7817	0.759856	3.75583	2.99598	2014 CPTAC CRC	7.55483e-28	8.11515e-27	0.58235	0.240811	-0.341539	0.5555	0.196	-0.3595	2019 CPTAC CRC
STAU1	1.77649e-45	5.28401e-44	2.74587	2.75639	0.0105201	2.84753	2.85233	0.00479302	2014 CPTAC CRC	1.97225e-27	2.0609e-26	0.533151	0.208822	-0.324329	0.552	0.219	-0.333	2019 CPTAC CRC
SUPT16H	5.40577e-10	1.38918e-09	0.787966	4.12699	3.33902	0.741955	4.19206	3.45011	2014 CPTAC CRC	6.56882e-29	7.65762e-28	0.549276	0.227685	-0.321591	0.546	0.217	-0.329	2019 CPTAC CRC
SYNCRIP	9.79076e-25	6.39755e-24	0.800798	5.56971	4.76891	0.80092	5.57231	4.77139	2014 CPTAC CRC	1.29553e-41	4.56376e-40	0.637945	0.254765	-0.38318	0.649	0.279	-0.37	2019 CPTAC CRC
TOP1	2.12458e-08	4.84316e-08	0.543155	4.40992	3.86677	0.648265	4.47092	3.82266	2014 CPTAC CRC	1.12644e-41	4.00308e-40	0.907931	0.308531	-0.5994	0.9155	0.32	-0.5955	2019 CPTAC CRC
U2AF1	2.54019e-35	3.76272e-34	3.08584	3.34792	0.262076	3.33813	3.34531	0.00717372	2014 CPTAC CRC	6.72259e-38	1.65408e-36	0.550003	0.203263	-0.34674	0.5895	0.236	-0.3535	2019 CPTAC CRC
WDR36	3.12571e-27	2.45696e-26	1.94784	2.37118	0.423344	2.35948	2.62565	0.266175	2014 CPTAC CRC	1.30314e-42	5.20418e-41	0.583051	0.207212	-0.375839	0.5675	0.18	-0.3875	2019 CPTAC CRC
XRN2	2.42208e-08	5.48435e-08	0.603943	3.25125	2.64731	0.712086	3.35843	2.64635	2014 CPTAC CRC	1.64102e-43	7.56463e-42	0.65919	0.25098	-0.40821	0.6515	0.238	-0.4135	2019 CPTAC CRC
ZC3H15	1.37067e-07	2.91541e-07	0.800048	2.37805	1.578	0.806041	2.47312	1.66708	2014 CPTAC CRC	3.72227e-32	5.59172e-31	0.504102	0.207178	-0.296924	0.509	0.215	-0.294	2019 CPTAC CRC

## Sheet: Table S4c
gene	p value	fdr	fcSR1	meanT	meanN	fcSR2	medianT	medianN	type	p value	fdr	fcSR1	meanT	meanN	fcSR2	medianT	medianN	type	p value	fdr	fcSR1	meanT	meanN	fcSR2	medianT	medianN	type	p value	fdr	fcSR1	meanT	meanN	fcSR2	medianT	medianN	type	pvalue	fdr	fcSR1	meanT	meanN	fcSR2	medianT	medianN	type	p value	fdr	fcSR1	meanT
ABCF1	9.02513e-35	8.47935e-34	1.07738	0.443123	-0.634253	0.95835	0.34675	-0.6116	Lung adenocarcinoma	0.00718199	0.022956	0.177995	0.0492625	-0.128732	0.222562	0.0775744	-0.144987	Ovarian Cancer	0.000887598	0.0013603	0.294517	2.86519	2.57067	0.367842	2.90429	2.53644	2014 CPTAC CRC	4.39897e-10	1.5821e-09	0.156817	0.120219	-0.036598	0.15215	0.11	-0.04215	2019 CPTAC CRC	0.281218	0.397953	0.0165778	0.113781	0.0972027	0.033352	0.122244	0.0888925	Clear Cell Renal Cell Carcinoma	1.29877e-19	1.11889e-18	0.25187	26.3715
ACIN1	6.53185e-40	8.2678e-39	0.894531	0.450559	-0.443972	0.79005	0.40265	-0.3874	Lung adenocarcinoma	4.72259e-11	3.09054e-09	0.367519	-0.0875546	-0.455074	0.353797	-0.102439	-0.456236	Ovarian Cancer	5.84228e-16	2.22102e-15	1.76736	3.66244	1.89508	1.62134	3.72629	2.10495	2014 CPTAC CRC	1.35854e-26	1.33487e-25	0.307181	0.151671	-0.15551	0.2985	0.153	-0.1455	2019 CPTAC CRC	0.661476	0.757766	-0.0784665	-0.120303	-0.0418367	-0.112215	0.118527	0.230742	Clear Cell Renal Cell Carcinoma	5.6843e-09	1.78972e-08	0.215479	27.4989
ALYREF	8.7507e-45	1.50203e-43	1.89525	0.525886	-1.36936	1.9776	0.6279	-1.3497	Lung adenocarcinoma	8.21542e-05	0.000479415	0.407449	-0.0574386	-0.464888	0.321913	-0.063133	-0.385046	Ovarian Cancer	0.00081031	0.00124578	0.372813	3.80982	3.43701	0.377769	3.89156	3.51379	2014 CPTAC CRC	1.54862e-14	7.1756e-14	0.284088	0.129926	-0.154162	0.319	0.126	-0.193	2019 CPTAC CRC	0.848858	0.892212	-0.00366709	0.106739	0.110407	0.0140703	0.112421	0.0983506	Clear Cell Renal Cell Carcinoma	2.13268e-13	1.00706e-12	0.374872	27.9355
APOBEC3C	NA	NA	NA	NA	NA	NA	NA	NA	NA	NA	NA	NA	NA	NA	NA	NA	NA	NA	NA	NA	NA	NA	NA	NA	NA	NA	NA	NA	NA	NA	NA	NA	NA	NA	NA	NA	NA	NA	NA	NA	NA	NA	NA	NA	NA	NA	NA	NA	NA
AQR	NA	NA	NA	NA	NA	NA	NA	NA	NA	NA	NA	NA	NA	NA	NA	NA	NA	NA	NA	NA	NA	NA	NA	NA	NA	NA	NA	NA	NA	NA	NA	NA	NA	NA	NA	NA	NA	NA	NA	NA	NA	NA	NA	NA	NA	NA	NA	NA	NA
BUB3	2.75484e-29	1.87707e-28	0.67994	0.429675	-0.250265	0.6708	0.4393	-0.2315	Lung adenocarcinoma	0.000717255	0.00316623	0.214509	0.159595	-0.0549136	0.201669	0.181742	-0.0199273	Ovarian Cancer	0.00861874	0.0119036	0.234232	3.35998	3.12575	0.0977843	3.34813	3.25035	2014 CPTAC CRC	4.42482e-40	1.35722e-38	0.396646	0.168573	-0.228073	0.3745	0.157	-0.2175	2019 CPTAC CRC	0.000170538	0.000358979	0.0617021	0.142888	0.0811856	0.0913423	0.158366	0.0670239	Clear Cell Renal Cell Carcinoma	9.44846e-12	3.7553e-11	0.243143	26.8117
C14orf166	NA	NA	NA	NA	NA	NA	NA	NA	NA	NA	NA	NA	NA	NA	NA	NA	NA	NA	NA	NA	NA	NA	NA	NA	NA	NA	NA	NA	NA	NA	NA	NA	NA	NA	NA	NA	NA	NA	NA	NA	NA	NA	NA	NA	NA	NA	NA	NA	NA
CCT3	1.77635e-21	8.20637e-21	0.599674	0.335962	-0.263712	0.5344	0.2924	-0.242	Lung adenocarcinoma	0.000134767	0.000735744	0.188526	0.171972	-0.0165538	0.187925	0.139343	-0.0485824	Ovarian Cancer	1.60957e-22	9.29249e-22	4.5772	5.781	1.20381	4.55832	5.78083	1.22251	2014 CPTAC CRC	1.30768e-13	5.77714e-13	0.205785	0.125327	-0.080458	0.20655	0.132	-0.07455	2019 CPTAC CRC	1.09287e-18	3.91479e-18	0.216957	0.157702	-0.0592554	0.203055	0.144762	-0.0582934	Clear Cell Renal Cell Carcinoma	0.738964	0.817444	0.00833912	28.2914
CCT4	NA	NA	NA	NA	NA	NA	NA	NA	NA	NA	NA	NA	NA	NA	NA	NA	NA	NA	NA	NA	NA	NA	NA	NA	NA	NA	NA	NA	NA	NA	NA	NA	NA	NA	NA	NA	NA	NA	NA	NA	NA	NA	NA	NA	NA	NA	NA	NA	NA
CCT6A	NA	NA	NA	NA	NA	NA	NA	NA	NA	NA	NA	NA	NA	NA	NA	NA	NA	NA	NA	NA	NA	NA	NA	NA	NA	NA	NA	NA	NA	NA	NA	NA	NA	NA	NA	NA	NA	NA	NA	NA	NA	NA	NA	NA	NA	NA	NA	NA	NA
CCT8	4.91063e-12	1.46157e-11	0.477627	0.325191	-0.152436	0.40835	0.29595	-0.1124	Lung adenocarcinoma	0.00126748	0.00516943	0.187851	0.222147	0.0342961	0.162238	0.176648	0.0144093	Ovarian Cancer	0.000163985	0.000266359	0.174356	5.91934	5.74498	0.155431	5.91121	5.75578	2014 CPTAC CRC	5.70506e-23	4.36648e-22	0.267509	0.137469	-0.13004	0.2355	0.115	-0.1205	2019 CPTAC CRC	4.48425e-11	1.25114e-10	0.130208	0.15014	0.0199315	0.114328	0.136077	0.021749	Clear Cell Renal Cell Carcinoma	1.30843e-06	3.28757e-06	0.133178	28.684
CDC5L	4.34228e-46	7.9991e-45	0.980103	0.429813	-0.55029	0.96665	0.43445	-0.5322	Lung adenocarcinoma	8.01266e-08	1.32041e-06	0.296026	-0.0481108	-0.344137	0.265452	-0.0474955	-0.312948	Ovarian Cancer	2.47623e-11	6.96943e-11	0.806512	3.37857	2.57206	0.862064	3.43429	2.57223	2014 CPTAC CRC	2.03233e-42	7.9202e-41	0.427766	0.196468	-0.231298	0.408	0.175	-0.233	2019 CPTAC CRC	1.2609e-17	4.3478e-17	0.148549	0.173167	0.0246179	0.191154	0.186624	-0.00453004	Clear Cell Renal Cell Carcinoma	5.25471e-17	3.48129e-16	0.245607	25.9186
CLTC	NA	NA	NA	NA	NA	NA	NA	NA	NA	NA	NA	NA	NA	NA	NA	NA	NA	NA	NA	NA	NA	NA	NA	NA	NA	NA	NA	NA	NA	NA	NA	NA	NA	NA	NA	NA	NA	NA	NA	NA	NA	NA	NA	NA	NA	NA	NA	NA	NA
CMAS	0.156964	0.240886	-0.156199	0.0307473	0.186947	-0.26175	-0.03615	0.2256	Lung adenocarcinoma	0.592832	0.751423	-0.0512081	-0.0506075	0.000600605	-0.183231	-0.154676	0.0285548	Ovarian Cancer	8.74471e-08	1.89028e-07	-0.437501	3.52176	3.95926	-0.306029	3.65153	3.95756	2014 CPTAC CRC	0.000184905	0.000452149	-0.207813	-0.100116	0.107697	-0.2455	-0.137	0.1085	2019 CPTAC CRC	5.10197e-18	1.78075e-17	0.209159	0.168099	-0.0410604	0.220672	0.165514	-0.0551579	Clear Cell Renal Cell Carcinoma	6.53646e-19	5.24762e-18	-0.452747	25.9134
CORO1A	0.268352	0.391892	0.165612	0.207021	0.0414089	0.13875	0.12605	-0.0127	Lung adenocarcinoma	0.278887	0.459327	-0.139238	-0.164	-0.0247626	-0.0635232	-0.256729	-0.193206	Ovarian Cancer	0.00430113	0.00615535	0.252436	4.95603	4.70359	0.264416	5.00255	4.73813	2014 CPTAC CRC	4.46665e-05	0.000115009	0.284331	0.0728928	-0.211438	0.3971	0.0656	-0.3315	2019 CPTAC CRC	1.15335e-36	7.66933e-36	1.27286	0.386597	-0.886267	1.49659	0.419835	-1.07675	Clear Cell Renal Cell Carcinoma	1.61099e-07	4.44022e-07	0.424758	28.9937
DARS	3.5979e-40	4.61641e-39	1.11207	0.500765	-0.611305	1.1018	0.4948	-0.607	Lung adenocarcinoma	1.01312e-06	1.09013e-05	0.340333	0.255711	-0.0846226	0.324452	0.248079	-0.0763722	Ovarian Cancer	0.364761	0.402308	-0.0660011	4.71523	4.78123	-0.0383794	4.72701	4.76539	2014 CPTAC CRC	2.76109e-30	3.55243e-29	0.328649	0.168663	-0.159986	0.2965	0.131	-0.1655	2019 CPTAC CRC	9.24858e-53	1.6237e-51	0.591112	0.2984	-0.292712	0.577157	0.28203	-0.295127	Clear Cell Renal Cell Carcinoma	1.95413e-21	2.03761e-20	0.308139	28.1985
DDB1	NA	NA	NA	NA	NA	NA	NA	NA	NA	NA	NA	NA	NA	NA	NA	NA	NA	NA	NA	NA	NA	NA	NA	NA	NA	NA	NA	NA	NA	NA	NA	NA	NA	NA	NA	NA	NA	NA	NA	NA	NA	NA	NA	NA	NA	NA	NA	NA	NA
DDX1	NA	NA	NA	NA	NA	NA	NA	NA	NA	NA	NA	NA	NA	NA	NA	NA	NA	NA	NA	NA	NA	NA	NA	NA	NA	NA	NA	NA	NA	NA	NA	NA	NA	NA	NA	NA	NA	NA	NA	NA	NA	NA	NA	NA	NA	NA	NA	NA	NA
DDX17	1.55446e-40	2.04018e-39	0.878638	0.409761	-0.468877	0.85745	0.39815	-0.4593	Lung adenocarcinoma	2.69111e-09	8.09582e-08	0.52016	0.0527004	-0.46746	0.51189	0.0516233	-0.460267	Ovarian Cancer	0.125895	0.148785	-0.0638464	5.79645	5.8603	0.0333304	5.82311	5.78978	2014 CPTAC CRC	5.25529e-45	2.80758e-43	0.422837	0.206011	-0.216826	0.4385	0.218	-0.2205	2019 CPTAC CRC	9.02935e-05	0.000193086	0.0687751	0.135207	0.0664315	0.0937518	0.132253	0.0385015	Clear Cell Renal Cell Carcinoma	1.44022e-19	1.23306e-18	0.283856	28.3066
DDX18	4.49703e-33	3.78705e-32	1.60057	0.452165	-1.14841	1.57485	0.43195	-1.1429	Lung adenocarcinoma	0.000291449	0.00143275	0.297137	0.176438	-0.1207	0.299871	0.16685	-0.133022	Ovarian Cancer	7.40765e-14	2.43947e-13	1.05678	3.59631	2.53954	1.06795	3.68182	2.61387	2014 CPTAC CRC	5.8852e-49	5.16042e-47	0.868846	0.300246	-0.5686	0.8455	0.268	-0.5775	2019 CPTAC CRC	3.09871e-49	4.13279e-48	0.394288	0.237548	-0.15674	0.382594	0.233138	-0.149456	Clear Cell Renal Cell Carcinoma	4.37552e-30	1.21185e-28	0.541454	25.9143
DDX21	1.49902e-31	1.15921e-30	2.32701	0.416437	-1.91057	2.32715	0.35965	-1.9675	Lung adenocarcinoma	9.83991e-05	0.000561215	0.483655	-0.0640039	-0.547659	0.483478	-0.0942142	-0.577692	Ovarian Cancer	1.23479e-42	2.96191e-41	2.61881	4.61019	1.99138	2.61859	4.66851	2.04992	2014 CPTAC CRC	3.28312e-56	7.56712e-54	1.1294	0.342347	-0.78705	1.119	0.36	-0.759	2019 CPTAC CRC	1.46614e-27	7.06812e-27	0.343337	0.213479	-0.129858	0.342458	0.187477	-0.154981	Clear Cell Renal Cell Carcinoma	1.38164e-24	2.05776e-23	0.642041	26.5436
DDX23	3.38549e-50	7.99192e-49	1.31873	0.488929	-0.829805	1.32825	0.47485	-0.8534	Lung adenocarcinoma	0.000280387	0.00138857	0.257194	-0.0181278	-0.275321	0.347945	-0.00429971	-0.352245	Ovarian Cancer	8.01662e-11	2.17719e-10	1.07264	2.73307	1.66043	1.01573	2.77012	1.75439	2014 CPTAC CRC	1.77941e-21	1.23746e-20	0.302772	0.176191	-0.126581	0.3145	0.168	-0.1465	2019 CPTAC CRC	2.44781e-22	9.97699e-22	0.185676	0.18842	0.00274431	0.205608	0.178506	-0.0271013	Clear Cell Renal Cell Carcinoma	1.36475e-16	8.73622e-16	0.272592	25.8358
DDX3X	8.18517e-32	6.41628e-31	1.4448	0.554138	-0.890664	1.538	0.634	-0.904	Lung adenocarcinoma	0.000842245	0.00362896	0.117372	0.0734885	-0.0438831	0.165118	0.116603	-0.0485144	Ovarian Cancer	3.79481e-09	9.14395e-09	0.357851	5.29135	4.9335	0.337033	5.28996	4.95292	2014 CPTAC CRC	3.45847e-18	1.94965e-17	0.323804	0.179805	-0.143999	0.301	0.162	-0.139	2019 CPTAC CRC	1.73759e-05	3.86313e-05	0.112633	0.131843	0.0192098	0.159021	0.128515	-0.0305063	Clear Cell Renal Cell Carcinoma	3.94933e-05	8.6563e-05	0.155128	28.1279
DDX41	NA	NA	NA	NA	NA	NA	NA	NA	NA	NA	NA	NA	NA	NA	NA	NA	NA	NA	NA	NA	NA	NA	NA	NA	NA	NA	NA	NA	NA	NA	NA	NA	NA	NA	NA	NA	NA	NA	NA	NA	NA	NA	NA	NA	NA	NA	NA	NA	NA
DDX46	8.95398e-06	1.93443e-05	0.476871	0.307279	-0.169593	0.700925	0.337875	-0.36305	Lung adenocarcinoma	4.20582e-09	1.15494e-07	0.318841	0.0904047	-0.228436	0.271929	0.0489738	-0.222956	Ovarian Cancer	8.02545e-12	2.33114e-11	0.9178	3.67209	2.75429	1.0488	3.73751	2.6887	2014 CPTAC CRC	3.96498e-38	1.00583e-36	0.423709	0.186427	-0.237282	0.4175	0.165	-0.2525	2019 CPTAC CRC	0.820127	0.870688	-0.0402834	-0.162118	-0.121835	-0.0883845	0.0525227	0.140907	Clear Cell Renal Cell Carcinoma	1.63982e-12	7.03218e-12	0.202228	26.1809
DDX5	1.13519e-53	3.37246e-52	1.2634	0.475666	-0.787739	1.23205	0.44975	-0.7823	Lung adenocarcinoma	4.94755e-12	5.47928e-10	0.705034	0.0827861	-0.622248	0.686266	0.0802965	-0.60597	Ovarian Cancer	0.000187307	0.000302391	0.211426	5.48284	5.27141	0.25097	5.49448	5.24351	2014 CPTAC CRC	1.27103e-47	9.40676e-46	0.820119	0.298405	-0.521714	0.8245	0.29	-0.5345	2019 CPTAC CRC	0.65466	0.751622	0.00732817	0.115804	0.108476	0.0282723	0.122081	0.0938091	Clear Cell Renal Cell Carcinoma	8.73706e-28	1.81618e-26	0.432219	27.6253
DDX6	7.11136e-19	2.92041e-18	0.636029	0.282709	-0.35332	0.5239	0.1845	-0.3394	Lung adenocarcinoma	0.17815	0.326911	0.0913475	0.0379154	-0.0534322	0.160014	0.0879601	-0.0720543	Ovarian Cancer	0.014299	0.0192473	0.201815	3.69504	3.49323	0.158492	3.70965	3.55116	2014 CPTAC CRC	2.40412e-18	1.36867e-17	0.229989	0.142127	-0.087862	0.246	0.135	-0.111	2019 CPTAC CRC	6.05904e-31	3.2772e-30	0.198024	0.158144	-0.03988	0.215413	0.156047	-0.0593665	Clear Cell Renal Cell Carcinoma	1.05531e-07	2.94815e-07	0.167667	26.4096
DHX15	NA	NA	NA	NA	NA	NA	NA	NA	NA	NA	NA	NA	NA	NA	NA	NA	NA	NA	NA	NA	NA	NA	NA	NA	NA	NA	NA	NA	NA	NA	NA	NA	NA	NA	NA	NA	NA	NA	NA	NA	NA	NA	NA	NA	NA	NA	NA	NA	NA
DHX30	NA	NA	NA	NA	NA	NA	NA	NA	NA	NA	NA	NA	NA	NA	NA	NA	NA	NA	NA	NA	NA	NA	NA	NA	NA	NA	NA	NA	NA	NA	NA	NA	NA	NA	NA	NA	NA	NA	NA	NA	NA	NA	NA	NA	NA	NA	NA	NA	NA
DHX36	9.95306e-13	3.05583e-12	0.595027	0.297579	-0.297448	0.58445	0.26015	-0.3243	Lung adenocarcinoma	0.00272268	0.00998074	0.201018	0.139171	-0.0618473	0.257754	0.158277	-0.0994772	Ovarian Cancer	8.29756e-06	1.52573e-05	0.637967	1.60439	0.966419	0.895571	1.70555	0.809984	2014 CPTAC CRC	1.36484e-08	4.49393e-08	0.176985	0.113529	-0.063456	0.17465	0.118	-0.05665	2019 CPTAC CRC	4.51913e-08	1.12738e-07	-0.0841818	0.0375252	0.121707	-0.0708904	0.0328229	0.103713	Clear Cell Renal Cell Carcinoma	2.30954e-27	4.55593e-26	0.405192	24.7418
DHX9	NA	NA	NA	NA	NA	NA	NA	NA	NA	NA	NA	NA	NA	NA	NA	NA	NA	NA	NA	NA	NA	NA	NA	NA	NA	NA	NA	NA	NA	NA	NA	NA	NA	NA	NA	NA	NA	NA	NA	NA	NA	NA	NA	NA	NA	NA	NA	NA	NA
DKC1	7.90929e-63	4.45859e-61	2.33867	0.719964	-1.61871	2.2581	0.6355	-1.6226	Lung adenocarcinoma	3.25429e-07	4.19932e-06	0.497423	0.160243	-0.33718	0.555692	0.132056	-0.423635	Ovarian Cancer	1.57164e-71	2.33734e-69	3.56053	3.69736	0.13683	3.72565	3.73044	0.00479302	2014 CPTAC CRC	4.47723e-42	1.67212e-40	0.635736	0.231251	-0.404485	0.6135	0.202	-0.4115	2019 CPTAC CRC	9.67305e-05	0.000206398	0.0845974	0.125699	0.0411013	0.115305	0.120892	0.00558708	Clear Cell Renal Cell Carcinoma	6.42908e-11	2.40214e-10	0.231231	26.6431
DNAJA3	2.37052e-23	1.20168e-22	1.70775	0.493114	-1.21464	1.85833	0.518675	-1.33965	Lung adenocarcinoma	0.939417	0.969741	0.00882807	-0.129222	-0.13805	0.109862	-0.145804	-0.255666	Ovarian Cancer	0.0360028	0.0459837	0.261796	2.38185	2.12005	0.453847	2.56681	2.11297	2014 CPTAC CRC	3.51866e-14	1.60096e-13	0.366224	0.112949	-0.253275	0.3745	0.102	-0.2725	2019 CPTAC CRC	0.118384	0.186869	-0.624186	-2.32125	-1.69707	-0.28004	-0.257749	0.0222902	Clear Cell Renal Cell Carcinoma	0.0265155	0.0429024	-0.106195	24.6541
DNMT1	4.65726e-27	2.8195e-26	1.46095	0.4786	-0.982349	1.4901	0.5061	-0.984	Lung adenocarcinoma	0.000978589	0.00412818	0.308097	0.0589179	-0.249179	0.252184	-0.0516272	-0.303811	Ovarian Cancer	6.69945e-36	1.05099e-34	1.95004	2.01424	0.064206	2.18207	2.18687	0.00479302	2014 CPTAC CRC	4.95393e-23	3.8133e-22	0.426336	0.210162	-0.216174	0.4215	0.199	-0.2225	2019 CPTAC CRC	0.629857	0.731564	-0.109736	-5.12706	-5.01733	0	-5.54174	-5.54174	Clear Cell Renal Cell Carcinoma	7.21461e-30	1.94795e-28	0.55563	24.939
EEF1A1	2.32335e-32	1.87835e-31	0.879153	0.339298	-0.539854	0.93595	0.37695	-0.559	Lung adenocarcinoma	3.45508e-13	6.55427e-11	0.622982	0.106574	-0.516408	0.615735	0.120738	-0.494998	Ovarian Cancer	0.000985206	0.00150061	0.203836	7.8512	7.64737	0.24492	7.85516	7.61023	2014 CPTAC CRC	2.20701e-18	1.26001e-17	0.292275	0.120458	-0.171817	0.2648	0.0703	-0.1945	2019 CPTAC CRC	0.517378	0.640085	0.0127941	0.0752083	0.0624142	-0.00315145	0.0768312	0.0799826	Clear Cell Renal Cell Carcinoma	1.4869e-11	5.82348e-11	-0.335066	30.7748
EEF1G	1.19247e-40	1.58321e-39	1.38338	0.55811	-0.825273	1.49265	0.64865	-0.844	Lung adenocarcinoma	1.06519e-13	2.66293e-11	0.729693	0.342308	-0.387385	0.679194	0.305859	-0.373334	Ovarian Cancer	3.00058e-10	7.81243e-10	0.417925	5.99112	5.5732	0.409339	5.97453	5.56519	2014 CPTAC CRC	1.35111e-45	7.84132e-44	0.592514	0.234729	-0.357785	0.607	0.234	-0.373	2019 CPTAC CRC	3.3985e-09	8.83384e-09	-0.0971312	0.0317412	0.128872	-0.0951423	0.0241539	0.119296	Clear Cell Renal Cell Carcinoma	3.89097e-12	1.60864e-11	0.270556	29.6413
EEF2	2.31892e-43	3.63004e-42	1.32503	0.509271	-0.815755	1.4031	0.5539	-0.8492	Lung adenocarcinoma	2.55835e-09	7.81304e-08	0.487882	0.375156	-0.112726	0.447615	0.386472	-0.0611433	Ovarian Cancer	0.199494	0.230204	-0.0714702	7.41734	7.48881	-0.0921525	7.4214	7.51356	2014 CPTAC CRC	5.54763e-32	8.16656e-31	0.418309	0.169189	-0.24912	0.449	0.176	-0.273	2019 CPTAC CRC	6.47093e-19	2.33296e-18	0.163194	0.133897	-0.0292976	0.157697	0.112781	-0.0449153	Clear Cell Renal Cell Carcinoma	0.000142546	0.00029435	0.122882	30.026
EIF2AK2	1.41682e-13	4.51947e-13	0.741751	0.372325	-0.369426	0.74565	0.30305	-0.4426	Lung adenocarcinoma	5.93321e-06	4.9133e-05	0.529102	0.0442268	-0.484876	0.502246	0.00144919	-0.500796	Ovarian Cancer	5.08137e-51	2.30397e-49	2.67637	2.86466	0.188297	2.84861	2.86056	0.0119509	2014 CPTAC CRC	4.56612e-25	4.05671e-24	0.439132	0.212721	-0.226411	0.4595	0.213	-0.2465	2019 CPTAC CRC	2.88056e-22	1.17123e-21	0.200538	0.168881	-0.0316577	0.202955	0.166393	-0.0365618	Clear Cell Renal Cell Carcinoma	1.32086e-38	1.11995e-36	0.721818	26.4615
EIF2S1	3.37929e-37	3.68896e-36	1.13018	0.554064	-0.576116	1.19765	0.58395	-0.6137	Lung adenocarcinoma	5.40612e-07	6.3947e-06	0.226361	0.0660583	-0.160303	0.259016	0.0759866	-0.18303	Ovarian Cancer	2.24891e-05	3.97219e-05	0.513156	4.11355	3.60039	0.386855	4.11906	3.7322	2014 CPTAC CRC	2.519e-22	1.83732e-21	0.262207	0.154188	-0.108019	0.255	0.148	-0.107	2019 CPTAC CRC	9.78435e-29	4.91105e-28	0.157217	0.175164	0.017947	0.14275	0.16659	0.0238402	Clear Cell Renal Cell Carcinoma	3.15796e-08	9.25558e-08	0.154844	27.4235
EIF2S3	2.78412e-43	4.31246e-42	1.34209	0.630045	-0.712049	1.35695	0.60415	-0.7528	Lung adenocarcinoma	1.00512e-09	3.65155e-08	0.338937	0.273537	-0.0653998	0.350852	0.260173	-0.0906795	Ovarian Cancer	1.68653e-09	4.14716e-09	0.52696	4.64402	4.11706	0.553295	4.66855	4.11525	2014 CPTAC CRC	4.28811e-34	7.63624e-33	0.426799	0.221001	-0.205798	0.4195	0.201	-0.2185	2019 CPTAC CRC	0.00637411	0.0119866	0.0395632	0.132761	0.0931981	0.0322644	0.119343	0.0870783	Clear Cell Renal Cell Carcinoma	3.49587e-25	5.53952e-24	0.355495	27.42
EIF3D	NA	NA	NA	NA	NA	NA	NA	NA	NA	NA	NA	NA	NA	NA	NA	NA	NA	NA	NA	NA	NA	NA	NA	NA	NA	NA	NA	NA	NA	NA	NA	NA	NA	NA	NA	NA	NA	NA	NA	NA	NA	NA	NA	NA	NA	NA	NA	NA	NA
EIF3F	NA	NA	NA	NA	NA	NA	NA	NA	NA	NA	NA	NA	NA	NA	NA	NA	NA	NA	NA	NA	NA	NA	NA	NA	NA	NA	NA	NA	NA	NA	NA	NA	NA	NA	NA	NA	NA	NA	NA	NA	NA	NA	NA	NA	NA	NA	NA	NA	NA
EIF4A1	3.30836e-34	3.00961e-33	0.955323	0.449136	-0.506186	1.01355	0.48335	-0.5302	Lung adenocarcinoma	5.11593e-05	0.000321637	0.382178	0.187674	-0.194504	0.30483	0.183342	-0.121488	Ovarian Cancer	8.58502e-29	7.59979e-28	1.61109	6.04797	4.43688	1.7505	6.07457	4.32406	2014 CPTAC CRC	5.98977e-24	4.91051e-23	0.508728	0.215161	-0.293567	0.4575	0.186	-0.2715	2019 CPTAC CRC	2.4004e-57	6.43219e-56	0.408205	0.241059	-0.167146	0.438254	0.242102	-0.196151	Clear Cell Renal Cell Carcinoma	3.07103e-05	6.79124e-05	0.142113	29.4474
EIF5A	NA	NA	NA	NA	NA	NA	NA	NA	NA	NA	NA	NA	NA	NA	NA	NA	NA	NA	NA	NA	NA	NA	NA	NA	NA	NA	NA	NA	NA	NA	NA	NA	NA	NA	NA	NA	NA	NA	NA	NA	NA	NA	NA	NA	NA	NA	NA	NA	NA
EIF5B	3.27609e-58	1.35728e-56	1.79487	0.630885	-1.16398	1.7331	0.5567	-1.1764	Lung adenocarcinoma	1.39064e-07	2.07015e-06	0.356134	0.196695	-0.159439	0.357696	0.178547	-0.179149	Ovarian Cancer	1.55265e-07	3.29494e-07	0.747298	3.50421	2.75691	0.734669	3.59235	2.85768	2014 CPTAC CRC	7.36922e-26	6.89646e-25	0.356657	0.153582	-0.203075	0.3735	0.163	-0.2105	2019 CPTAC CRC	1.84781e-13	5.56528e-13	0.147496	0.148776	0.00128018	0.151004	0.126745	-0.0242594	Clear Cell Renal Cell Carcinoma	4.27162e-07	1.12505e-06	0.170205	26.3978
ELAVL1	NA	NA	NA	NA	NA	NA	NA	NA	NA	NA	NA	NA	NA	NA	NA	NA	NA	NA	NA	NA	NA	NA	NA	NA	NA	NA	NA	NA	NA	NA	NA	NA	NA	NA	NA	NA	NA	NA	NA	NA	NA	NA	NA	NA	NA	NA	NA	NA	NA
EMG1	1.77995e-08	4.44924e-08	0.657035	0.0737845	-0.58325	0.65795	-0.00265	-0.6606	Lung adenocarcinoma	0.00650004	0.0211382	0.19833	-0.436879	-0.635209	0.156232	-0.491579	-0.647812	Ovarian Cancer	1.08777e-06	2.15927e-06	0.636502	1.94872	1.31222	0.585488	2.01434	1.42885	2014 CPTAC CRC	4.15744e-34	7.41992e-33	0.70483	0.226665	-0.478165	0.724	0.238	-0.486	2019 CPTAC CRC	1.03132e-24	4.49618e-24	0.224605	0.195845	-0.0287595	0.224523	0.186393	-0.0381295	Clear Cell Renal Cell Carcinoma	5.8223e-12	2.35672e-11	0.339948	24.4612
ENO1	1.55995e-18	6.2714e-18	2.16491	0.156179	-2.00873	2.2205	0.1295	-2.091	Lung adenocarcinoma	0.00223906	0.00843244	0.362849	-0.259295	-0.622144	0.227735	-0.338323	-0.566058	Ovarian Cancer	6.06152e-29	5.48002e-28	1.54411	7.22808	5.68396	1.52685	7.22834	5.70149	2014 CPTAC CRC	4.83407e-07	1.42792e-06	0.227159	0.101099	-0.12606	0.2355	0.084	-0.1515	2019 CPTAC CRC	2.04975e-44	2.08537e-43	1.04483	0.371292	-0.673534	1.03064	0.419312	-0.611326	Clear Cell Renal Cell Carcinoma	0.572244	0.678811	-0.0192475	30.8475
EZR	0.0602248	0.0984283	-0.242912	-0.0488455	0.194066	-0.43565	-0.23405	0.2016	Lung adenocarcinoma	2.99912e-05	0.000201771	0.414743	0.177407	-0.237336	0.324713	0.0954337	-0.229279	Ovarian Cancer	2.75013e-14	9.33788e-14	0.55086	5.83438	5.28352	0.612269	5.83727	5.225	2014 CPTAC CRC	0.418965	0.53058	0.0449618	0.0160608	-0.028901	0.0542	-0.0139	-0.0681	2019 CPTAC CRC	0.000958329	0.00193084	-0.133951	0.0183345	0.152285	-0.14922	0.0324718	0.181692	Clear Cell Renal Cell Carcinoma	0.387911	0.496958	-0.0493847	29.5265
FAM98A	8.02296e-08	1.94329e-07	0.398624	0.229488	-0.169136	0.44355	0.25995	-0.1836	Lung adenocarcinoma	0.00389966	0.0137176	0.218646	0.0414932	-0.177153	0.180522	0.0411887	-0.139333	Ovarian Cancer	7.07804e-18	3.05292e-17	1.42286	1.83411	0.411241	2.0079	2.04536	0.0374666	2014 CPTAC CRC	0.810709	0.865193	-0.00805069	0.0478103	0.055861	0.00795	0.0364	0.02845	2019 CPTAC CRC	7.17842e-28	3.49084e-27	-0.288472	-0.0554111	0.233061	-0.312371	-0.0801919	0.232179	Clear Cell Renal Cell Carcinoma	0.158433	0.226675	-0.0536381	24.9351
FBL	7.4165e-45	1.27941e-43	1.56363	0.583138	-0.980491	1.38685	0.47495	-0.9119	Lung adenocarcinoma	2.93306e-13	5.77837e-11	0.666754	0.0319858	-0.634768	0.572612	-0.0431445	-0.615756	Ovarian Cancer	6.34968e-10	1.61921e-09	0.627398	4.51732	3.88992	0.574241	4.5245	3.95026	2014 CPTAC CRC	5.63286e-43	2.40425e-41	0.625541	0.239384	-0.386157	0.5745	0.198	-0.3765	2019 CPTAC CRC	2.10494e-41	1.77585e-40	0.298535	0.193782	-0.104752	0.305269	0.188323	-0.116945	Clear Cell Renal Cell Carcinoma	1.13095e-14	5.97691e-14	0.231871	27.7681
FIP1L1	NA	NA	NA	NA	NA	NA	NA	NA	NA	NA	NA	NA	NA	NA	NA	NA	NA	NA	NA	NA	NA	NA	NA	NA	NA	NA	NA	NA	NA	NA	NA	NA	NA	NA	NA	NA	NA	NA	NA	NA	NA	NA	NA	NA	NA	NA	NA	NA	NA
FRG1	NA	NA	NA	NA	NA	NA	NA	NA	NA	NA	NA	NA	NA	NA	NA	NA	NA	NA	NA	NA	NA	NA	NA	NA	NA	NA	NA	NA	NA	NA	NA	NA	NA	NA	NA	NA	NA	NA	NA	NA	NA	NA	NA	NA	NA	NA	NA	NA	NA
FUS	7.7288e-12	2.27671e-11	0.708696	0.125959	-0.582737	0.788	0.1572	-0.6308	Lung adenocarcinoma	2.15192e-07	2.95465e-06	0.714138	-0.0669826	-0.781121	0.782253	-0.0900261	-0.872279	Ovarian Cancer	0.897712	0.908216	0.00792502	4.05843	4.05051	-0.0237228	4.04497	4.0687	2014 CPTAC CRC	1.14578e-31	1.62729e-30	0.612911	0.225247	-0.387664	0.5885	0.192	-0.3965	2019 CPTAC CRC	1.98273e-16	6.57542e-16	0.211964	0.159967	-0.0519968	0.256199	0.181898	-0.0743008	Clear Cell Renal Cell Carcinoma	2.40423e-24	3.49463e-23	0.51293	26.7362
FXR1	9.48017e-19	3.85941e-18	0.832989	0.274435	-0.558553	0.7528	0.1984	-0.5544	Lung adenocarcinoma	0.00117897	0.00485959	0.348634	0.048384	-0.30025	0.467519	0.00576128	-0.461758	Ovarian Cancer	2.5115e-34	3.40794e-33	1.5645	1.59078	0.0262885	1.7074	1.71219	0.00479302	2014 CPTAC CRC	3.36796e-08	1.08158e-07	0.213264	0.126773	-0.086491	0.248	0.142	-0.106	2019 CPTAC CRC	0.726612	0.803838	-0.0580634	-5.33417	-5.27611	0	-5.54174	-5.54174	Clear Cell Renal Cell Carcinoma	1.86989e-15	1.06257e-14	0.468029	26.7408
G3BP2	3.53407e-23	1.77495e-22	0.956594	0.455145	-0.501449	0.897575	0.397675	-0.4999	Lung adenocarcinoma	2.47004e-06	2.32428e-05	0.422718	-0.0312089	-0.453927	0.46556	-0.0518852	-0.517445	Ovarian Cancer	0.935897	0.942743	0.00971994	2.70695	2.69723	-0.114799	2.71442	2.82922	2014 CPTAC CRC	9.93967e-10	3.4984e-09	0.187998	0.0912103	-0.096788	0.17435	0.0808	-0.09355	2019 CPTAC CRC	3.51287e-07	8.45195e-07	-0.794791	-0.562241	0.23255	-0.392577	-0.151392	0.241185	Clear Cell Renal Cell Carcinoma	3.2593e-10	1.14896e-09	0.199063	26.3321
GNB2L1	NA	NA	NA	NA	NA	NA	NA	NA	NA	NA	NA	NA	NA	NA	NA	NA	NA	NA	NA	NA	NA	NA	NA	NA	NA	NA	NA	NA	NA	NA	NA	NA	NA	NA	NA	NA	NA	NA	NA	NA	NA	NA	NA	NA	NA	NA	NA	NA	NA
GNL3	8.13267e-35	7.64782e-34	1.66094	0.479564	-1.18138	1.6954	0.4228	-1.2726	Lung adenocarcinoma	0.0362811	0.0901261	0.224422	-0.0079193	-0.232342	0.205469	-0.0195838	-0.225053	Ovarian Cancer	1.47462e-26	1.1076e-25	1.82307	2.29209	0.469018	1.85794	2.36549	0.507543	2014 CPTAC CRC	3.94861e-53	5.89878e-51	0.79943	0.283594	-0.515836	0.7825	0.258	-0.5245	2019 CPTAC CRC	1.8416e-63	8.73085e-62	0.735087	0.338137	-0.396951	0.745992	0.319337	-0.426655	Clear Cell Renal Cell Carcinoma	0.00597387	0.010393	0.0887726	24.8645
GTPBP4	4.43034e-18	1.73909e-17	1.14377	0.303617	-0.840152	1.31185	0.38385	-0.928	Lung adenocarcinoma	2.70719e-05	0.000184415	0.449448	0.219756	-0.229692	0.454683	0.195208	-0.259475	Ovarian Cancer	2.50982e-11	7.05864e-11	1.22967	2.77054	1.54086	1.29047	2.85664	1.56617	2014 CPTAC CRC	4.39402e-57	1.36333e-54	0.818665	0.296952	-0.521713	0.8255	0.289	-0.5365	2019 CPTAC CRC	1.35371e-48	1.72679e-47	0.468213	0.250997	-0.217216	0.45854	0.247137	-0.211404	Clear Cell Renal Cell Carcinoma	4.72874e-41	6.62435e-39	0.619643	25.6748
HEATR1	1.85325e-30	1.35206e-29	1.31174	0.391742	-0.919999	1.3165	0.3326	-0.9839	Lung adenocarcinoma	9.95203e-07	1.07614e-05	0.390175	0.241021	-0.149154	0.302495	0.177342	-0.125153	Ovarian Cancer	5.31815e-21	2.781e-20	1.94986	3.17448	1.22463	1.98888	3.28614	1.29726	2014 CPTAC CRC	2.14398e-41	7.48721e-40	0.53766	0.220577	-0.317083	0.5145	0.207	-0.3075	2019 CPTAC CRC	3.05849e-38	2.19993e-37	0.309007	0.200399	-0.108609	0.334889	0.208251	-0.126638	Clear Cell Renal Cell Carcinoma	5.86557e-31	1.78291e-29	0.494485	24.7115
HIST1H1B	0.483567	0.646176	-0.197237	-0.248366	-0.0511297	-0.61495	-0.62085	-0.0059	Lung adenocarcinoma	6.82502e-05	0.000408933	0.538397	-0.296257	-0.834654	0.476802	-0.26879	-0.745592	Ovarian Cancer	0.00143951	0.00215289	-0.188424	5.82689	6.01531	-0.211669	5.82561	6.03728	2014 CPTAC CRC	5.5577e-21	3.73305e-20	0.658243	0.178245	-0.479998	0.6675	0.21	-0.4575	2019 CPTAC CRC	1.17911e-42	1.07117e-41	1.71869	0.393179	-1.32551	1.77764	0.379505	-1.39814	Clear Cell Renal Cell Carcinoma	1.94049e-07	5.30451e-07	0.390337	30.7848
HIST1H2BC	NA	NA	NA	NA	NA	NA	NA	NA	NA	NA	NA	NA	NA	NA	NA	NA	NA	NA	NA	NA	NA	NA	NA	NA	NA	NA	NA	NA	NA	NA	NA	NA	NA	NA	NA	NA	NA	NA	NA	NA	NA	NA	NA	NA	NA	NA	NA	NA	NA
HNRNPA0	0.361442	0.507643	0.0673021	0.213287	0.145985	-0.02	0.2339	0.2539	Lung adenocarcinoma	0.000860593	0.00370169	0.484309	0.109341	-0.374969	0.444665	0.139962	-0.304703	Ovarian Cancer	0.0158316	0.0212038	0.243088	3.81927	3.57618	0.142635	3.79283	3.6502	2014 CPTAC CRC	9.94633e-22	6.99538e-21	0.544003	0.181311	-0.362692	0.5345	0.17	-0.3645	2019 CPTAC CRC	9.96474e-10	2.64837e-09	0.147642	0.180395	0.0327529	0.179913	0.185612	0.00569933	Clear Cell Renal Cell Carcinoma	0.0240519	0.0391522	0.0891818	27.6672
HNRNPA1	3.33846e-38	3.848e-37	1.74794	0.231631	-1.51631	1.73327	0.242725	-1.49055	Lung adenocarcinoma	2.40418e-09	7.50134e-08	0.713243	-0.0568774	-0.77012	0.635534	-0.0749012	-0.710436	Ovarian Cancer	1.44555e-17	6.14236e-17	1.30142	6.39206	5.09064	1.11249	6.33038	5.21789	2014 CPTAC CRC	1.47369e-35	3.01732e-34	0.668391	0.227862	-0.440529	0.6425	0.204	-0.4385	2019 CPTAC CRC	4.74023e-05	0.000102831	0.135952	0.101094	-0.0348578	0.131944	0.0800761	-0.0518681	Clear Cell Renal Cell Carcinoma	3.1226e-20	2.88006e-19	0.380805	29.8019
HNRNPA2B1	NA	NA	NA	NA	NA	NA	NA	NA	NA	NA	NA	NA	NA	NA	NA	NA	NA	NA	NA	NA	NA	NA	NA	NA	NA	NA	NA	NA	NA	NA	NA	NA	NA	NA	NA	NA	NA	NA	NA	NA	NA	NA	NA	NA	NA	NA	NA	NA	NA
HNRNPA3	3.29897e-23	1.66011e-22	0.90022	0.404509	-0.495711	0.8417	0.3815	-0.4602	Lung adenocarcinoma	1.4841e-05	0.000109095	0.523617	-0.0302842	-0.553902	0.494902	-0.0316981	-0.5266	Ovarian Cancer	0.266266	0.301822	0.0938812	5.7329	5.63902	0.0508099	5.78083	5.73002	2014 CPTAC CRC	1.7613e-18	1.01725e-17	0.323879	0.149406	-0.174473	0.359	0.158	-0.201	2019 CPTAC CRC	0.0901578	0.145922	-0.0483506	0.0899201	0.138271	-0.0195503	0.0898224	0.109373	Clear Cell Renal Cell Carcinoma	0.00011289	0.000235934	0.148447	29.2516
HNRNPAB	1.19186e-37	1.33935e-36	1.57546	0.525577	-1.04988	1.4066	0.4115	-0.9951	Lung adenocarcinoma	2.73681e-11	2.05832e-09	0.864769	-0.0537225	-0.918491	0.894064	-0.0804243	-0.974488	Ovarian Cancer	1.49212e-11	4.27405e-11	-0.397688	4.7399	5.13759	-0.406363	4.70236	5.10872	2014 CPTAC CRC	5.18545e-24	4.2772e-23	0.527483	0.184678	-0.342805	0.594	0.231	-0.363	2019 CPTAC CRC	1.55645e-32	8.81339e-32	0.384644	0.252124	-0.132521	0.387323	0.234829	-0.152495	Clear Cell Renal Cell Carcinoma	0.0524999	0.0812462	0.082904	27.8037
HNRNPC	2.7283e-07	6.4112e-07	0.407841	0.205263	-0.202579	0.448125	0.227225	-0.2209	Lung adenocarcinoma	8.91694e-10	3.35317e-08	0.807619	-0.0997237	-0.907343	0.842716	-0.101209	-0.943925	Ovarian Cancer	0.124554	0.147388	0.0809835	6.02937	5.94839	-0.00401232	5.97237	5.97639	2014 CPTAC CRC	1.57822e-38	4.21574e-37	0.580808	0.230295	-0.350513	0.5725	0.23	-0.3425	2019 CPTAC CRC	0.200798	0.298318	0.223547	-0.0935176	-0.317064	0.267088	0.154084	-0.113004	Clear Cell Renal Cell Carcinoma	6.2389e-13	2.79579e-12	0.249634	30.0351
HNRNPH1	NA	NA	NA	NA	NA	NA	NA	NA	NA	NA	NA	NA	NA	NA	NA	NA	NA	NA	NA	NA	NA	NA	NA	NA	NA	NA	NA	NA	NA	NA	NA	NA	NA	NA	NA	NA	NA	NA	NA	NA	NA	NA	NA	NA	NA	NA	NA	NA	NA
HNRNPK	0.00559646	0.0101127	-0.335883	-0.208937	0.126946	-0.1424	-0.1105	0.0319	Lung adenocarcinoma	3.59047e-08	6.7133e-07	0.573899	-0.0181366	-0.592035	0.552406	-0.025563	-0.577969	Ovarian Cancer	0.531302	0.569274	-0.0359452	6.72942	6.76536	-0.0418679	6.73597	6.77784	2014 CPTAC CRC	6.17884e-38	1.53368e-36	0.487885	0.173182	-0.314703	0.506	0.185	-0.321	2019 CPTAC CRC	0.0328512	0.0573304	-0.0546303	0.0709901	0.12562	-0.0308737	0.0757221	0.106596	Clear Cell Renal Cell Carcinoma	5.58884e-07	1.45572e-06	0.128651	29.8558
HNRNPL	NA	NA	NA	NA	NA	NA	NA	NA	NA	NA	NA	NA	NA	NA	NA	NA	NA	NA	NA	NA	NA	NA	NA	NA	NA	NA	NA	NA	NA	NA	NA	NA	NA	NA	NA	NA	NA	NA	NA	NA	NA	NA	NA	NA	NA	NA	NA	NA	NA
HNRNPM	0.0030774	0.00566295	3.89443	-0.804477	-4.69891	1.91065	0.64725	-1.2634	Lung adenocarcinoma	6.56383e-08	1.12177e-06	0.405712	-0.0395554	-0.445267	0.415681	-0.025201	-0.440882	Ovarian Cancer	6.80123e-05	0.00011515	0.432921	6.08275	5.64983	0.310672	6.04843	5.73776	2014 CPTAC CRC	1.30084e-39	3.8439e-38	0.567489	0.214401	-0.353088	0.5855	0.224	-0.3615	2019 CPTAC CRC	0.00149878	0.00298279	0.0510955	0.138586	0.0874907	0.087824	0.149222	0.0613985	Clear Cell Renal Cell Carcinoma	1.65746e-19	1.4103e-18	0.258499	29.4238
HNRNPU	7.64662e-15	2.58123e-14	1.46908	0.471735	-0.997341	1.24418	0.386625	-0.85755	Lung adenocarcinoma	5.0651e-10	2.14407e-08	0.709465	0.167364	-0.542101	0.681289	0.16871	-0.512579	Ovarian Cancer	2.47702e-06	4.75456e-06	0.300264	6.57935	6.27909	0.302973	6.59678	6.29381	2014 CPTAC CRC	1.24117e-46	7.82229e-45	0.558378	0.201186	-0.357192	0.5805	0.211	-0.3695	2019 CPTAC CRC	0.859884	0.900084	0.0711813	-3.31722	-3.38841	0	-5.54174	-5.54174	Clear Cell Renal Cell Carcinoma	2.73279e-11	1.05534e-10	0.221091	29.1052
HNRNPUL1	9.54329e-11	2.65288e-10	0.55349	0.283791	-0.269699	0.48695	0.19995	-0.287	Lung adenocarcinoma	1.51995e-05	0.000111404	0.372447	0.0508685	-0.321579	0.380468	0.0223221	-0.358145	Ovarian Cancer	2.4315e-15	8.92432e-15	-0.863441	3.17723	4.04067	-0.803005	3.25797	4.06098	2014 CPTAC CRC	1.38695e-33	2.33581e-32	0.384292	0.163808	-0.220484	0.383	0.155	-0.228	2019 CPTAC CRC	2.5319e-07	6.13714e-07	0.100687	0.145518	0.0448306	0.139227	0.157457	0.0182297	Clear Cell Renal Cell Carcinoma	1.22597e-06	3.09083e-06	0.148816	27.087
HNRNPUL2	3.21803e-26	1.87554e-25	0.788796	0.46455	-0.324246	0.7397	0.4627	-0.277	Lung adenocarcinoma	1.68843e-07	2.42393e-06	0.416363	0.00992035	-0.406443	0.377267	-0.00258718	-0.379854	Ovarian Cancer	0.00209851	0.00308878	-0.190429	4.80242	4.99285	-0.216419	4.84013	5.05655	2014 CPTAC CRC	3.00332e-11	1.1648e-10	0.191346	0.106035	-0.085311	0.1828	0.0763	-0.1065	2019 CPTAC CRC	4.99121e-08	1.24223e-07	0.089849	0.152548	0.0626994	0.112519	0.161792	0.049273	Clear Cell Renal Cell Carcinoma	0.0069864	0.0120633	0.0897584	27.7785
HSP90AB1	2.67784e-37	2.94191e-36	1.55799	0.460091	-1.0979	1.5227	0.4097	-1.113	Lung adenocarcinoma	6.22391e-13	9.95102e-11	0.829561	0.344756	-0.484805	0.810383	0.330378	-0.480005	Ovarian Cancer	4.98273e-08	1.09945e-07	0.360172	7.94091	7.58074	0.301509	7.92013	7.61863	2014 CPTAC CRC	6.56726e-47	4.34247e-45	0.727415	0.255364	-0.472051	0.7195	0.244	-0.4755	2019 CPTAC CRC	1.8109e-25	8.11545e-25	0.239262	0.151965	-0.0872971	0.214122	0.122149	-0.0919733	Clear Cell Renal Cell Carcinoma	7.05725e-27	1.31436e-25	0.366304	30.8465
IGF2BP1	0.451674	0.612765	0.81431	-2.70237	-3.51668	0.1993	-1.8601	-2.0594	Lung adenocarcinoma	0.000122458	0.000675864	0.626525	-0.354288	-0.980813	0.771983	-0.345505	-1.11749	Ovarian Cancer	1.9237e-11	5.4765e-11	-1.09198	1.55982	2.6518	-1.31804	1.37849	2.69653	2014 CPTAC CRC	0.906195	0.936134	-0.0378444	-4.54478	-4.50693	0	-5.54	-5.54	2019 CPTAC CRC	0.0135796	0.0248192	-0.886655	-1.89829	-1.01164	-0.238633	-0.415429	-0.176796	Clear Cell Renal Cell Carcinoma	2.80977e-07	7.55262e-07	0.820222	23.2254
IGF2BP3	1.90244e-06	4.25073e-06	2.79388	-2.22071	-5.01459	1.4187	-3.3526	-4.7713	Lung adenocarcinoma	4.62559e-05	0.000295416	0.715534	-0.575385	-1.29092	0.376591	-0.95271	-1.3293	Ovarian Cancer	3.36448e-07	6.94181e-07	0.834203	1.71095	0.876745	0.612331	1.56071	0.948383	2014 CPTAC CRC	8.27135e-13	3.4898e-12	0.91261	0.193248	-0.719362	0.927	0.294	-0.633	2019 CPTAC CRC	0.00292229	0.00564501	0.982399	-1.41866	-2.40105	0.78237	-0.626837	-1.40921	Clear Cell Renal Cell Carcinoma	2.45665e-15	1.38138e-14	1.36377	25.5307
ILF2	1.56291e-33	1.35709e-32	0.749654	0.342655	-0.406999	0.6864	0.3163	-0.3701	Lung adenocarcinoma	1.88718e-11	1.54626e-09	0.807373	0.238126	-0.569248	0.699463	0.204729	-0.494734	Ovarian Cancer	7.59272e-07	1.52511e-06	0.346616	5.38186	5.03524	0.290846	5.36783	5.07699	2014 CPTAC CRC	3.39131e-39	9.59918e-38	0.450057	0.177127	-0.27293	0.4815	0.184	-0.2975	2019 CPTAC CRC	0.209068	0.309076	0.0347436	0.13031	0.0955665	0.0224502	0.133217	0.110766	Clear Cell Renal Cell Carcinoma	2.60506e-07	7.03366e-07	0.178241	27.6828
ILF3	7.89704e-36	7.90931e-35	1.49622	0.391661	-1.10456	1.5568	0.4444	-1.1124	Lung adenocarcinoma	5.74982e-13	9.34624e-11	0.591071	0.0351589	-0.555912	0.571653	0.0427649	-0.528888	Ovarian Cancer	7.99592e-25	5.26174e-24	3.8376	5.80919	1.97159	3.79957	5.82415	2.02459	2014 CPTAC CRC	4.33384e-50	4.66148e-48	0.536041	0.240804	-0.295237	0.5465	0.235	-0.3115	2019 CPTAC CRC	0.82824	0.876519	0.00285365	0.108104	0.105251	0.0198387	0.105684	0.085845	Clear Cell Renal Cell Carcinoma	4.93671e-22	5.50383e-21	0.292339	28.5929
KPNB1	NA	NA	NA	NA	NA	NA	NA	NA	NA	NA	NA	NA	NA	NA	NA	NA	NA	NA	NA	NA	NA	NA	NA	NA	NA	NA	NA	NA	NA	NA	NA	NA	NA	NA	NA	NA	NA	NA	NA	NA	NA	NA	NA	NA	NA	NA	NA	NA	NA
LARP1	5.40568e-35	5.14437e-34	1.34896	0.420075	-0.92889	1.3594	0.3977	-0.9617	Lung adenocarcinoma	0.000494088	0.00227891	0.160361	-0.00428267	-0.164644	0.169265	-0.0109239	-0.180189	Ovarian Cancer	1.78533e-08	4.1025e-08	0.922823	3.02367	2.10084	1.01437	3.23262	2.21825	2014 CPTAC CRC	2.8475e-26	2.73788e-25	0.387451	0.185132	-0.202319	0.4105	0.201	-0.2095	2019 CPTAC CRC	3.49193e-16	1.14958e-15	0.156103	0.142841	-0.0132611	0.128863	0.13335	0.00448621	Clear Cell Renal Cell Carcinoma	0.128144	0.186908	0.0503672	25.8796
LARS	2.26121e-35	2.19855e-34	1.20111	0.499786	-0.701327	1.18435	0.46695	-0.7174	Lung adenocarcinoma	4.83724e-14	1.47726e-11	0.473418	0.29291	-0.180508	0.399939	0.272747	-0.127192	Ovarian Cancer	0.0873165	0.105781	0.14223	4.47091	4.32868	-0.00360051	4.43629	4.43989	2014 CPTAC CRC	8.11044e-30	1.01437e-28	0.355216	0.183237	-0.171979	0.3725	0.195	-0.1775	2019 CPTAC CRC	0.0552325	0.0933024	0.0331551	0.095277	0.0621219	0.0495881	0.101302	0.0517143	Clear Cell Renal Cell Carcinoma	0.0839874	0.126432	-0.0562328	26.5377
LBR	0.00259463	0.00480198	0.415912	0.0727345	-0.343177	0.4316	0.123	-0.3086	Lung adenocarcinoma	0.982911	0.991789	0.00189667	0.259969	0.258072	-0.0261742	0.238428	0.264602	Ovarian Cancer	0.00954525	0.0131005	0.27012	3.50465	3.23452	0.332613	3.60881	3.27619	2014 CPTAC CRC	1.82781e-12	7.54991e-12	0.342651	0.16042	-0.182231	0.323	0.155	-0.168	2019 CPTAC CRC	5.32716e-24	2.28251e-23	0.428729	0.22005	-0.208679	0.474315	0.238279	-0.236036	Clear Cell Renal Cell Carcinoma	2.7806e-15	1.5536e-14	0.520432	27.0546
LYAR	0.0730192	0.118067	0.19957	0.0754755	-0.124094	0.1935	0.0593	-0.1342	Lung adenocarcinoma	0.00116316	0.00480227	0.280958	-0.00946275	-0.290421	0.225409	-0.0754497	-0.300859	Ovarian Cancer	2.49483e-16	9.80526e-16	1.04381	1.288	0.244196	1.33363	1.37109	0.0374666	2014 CPTAC CRC	1.54276e-43	7.22751e-42	0.786931	0.287346	-0.499585	0.789	0.29	-0.499	2019 CPTAC CRC	5.72769e-54	1.11229e-52	0.695085	0.329476	-0.365609	0.713403	0.339571	-0.373832	Clear Cell Renal Cell Carcinoma	3.56018e-11	1.35804e-10	0.307162	25.1385
MAP4	2.19263e-29	1.50393e-28	-1.12893	-0.236963	0.891966	-1.3149	-0.3137	1.0012	Lung adenocarcinoma	0.297815	0.480913	-0.0796836	-0.0703235	0.00936009	-0.00918243	-0.0842985	-0.0751161	Ovarian Cancer	4.09291e-32	4.56981e-31	3.75425	4.55639	0.802142	3.994	4.65248	0.658483	2014 CPTAC CRC	2.67986e-20	1.71438e-19	-0.416471	-0.118482	0.297989	-0.4175	-0.109	0.3085	2019 CPTAC CRC	0.0180253	0.0324932	0.047856	0.123294	0.0754384	0.0688688	0.118829	0.0499603	Clear Cell Renal Cell Carcinoma	0.36563	0.472232	-0.0418286	28.1383
MATR3	5.69772e-35	5.40733e-34	0.815155	0.354418	-0.460737	0.8046	0.394	-0.4106	Lung adenocarcinoma	1.00963e-10	5.71629e-09	0.488747	-0.102575	-0.591322	0.416578	-0.126662	-0.543239	Ovarian Cancer	0.140779	0.165429	0.11819	5.35285	5.23466	0.0832822	5.42614	5.34286	2014 CPTAC CRC	4.12517e-29	4.8866e-28	0.418882	0.158251	-0.260631	0.4295	0.167	-0.2625	2019 CPTAC CRC	0.000137613	0.000291138	-0.0608481	0.075994	0.136842	-0.0305935	0.0896927	0.120286	Clear Cell Renal Cell Carcinoma	2.90499e-11	1.11871e-10	0.175947	28.155
MCM3	1.50783e-24	8.1099e-24	2.69796	0.322183	-2.37577	2.59905	0.19435	-2.4047	Lung adenocarcinoma	8.38429e-10	3.18856e-08	0.745029	-0.0717781	-0.816807	0.709813	-0.129827	-0.83964	Ovarian Cancer	2.30969e-26	1.69378e-25	2.56062	3.3363	0.775688	2.83373	3.53124	0.697517	2014 CPTAC CRC	5.58379e-26	5.28071e-25	0.713179	0.212141	-0.501038	0.7335	0.22	-0.5135	2019 CPTAC CRC	5.39138e-62	2.22299e-60	1.02032	0.367142	-0.653177	1.00532	0.316802	-0.688521	Clear Cell Renal Cell Carcinoma	1.84795e-17	1.28229e-16	0.626449	26.8774
MCM5	9.03189e-20	3.8645e-19	2.25493	0.182829	-2.0721	2.2414	0.2322	-2.0092	Lung adenocarcinoma	2.64623e-06	2.46249e-05	0.465815	0.0657078	-0.400107	0.428544	-0.0100744	-0.438619	Ovarian Cancer	2.2781e-09	5.53956e-09	1.19667	3.40021	2.20354	1.04359	3.51475	2.47116	2014 CPTAC CRC	2.48057e-24	2.08445e-23	0.667624	0.194776	-0.472848	0.623	0.185	-0.438	2019 CPTAC CRC	4.52967e-62	1.88763e-60	1.00345	0.348896	-0.654555	0.993611	0.33192	-0.661691	Clear Cell Renal Cell Carcinoma	4.63408e-19	3.76728e-18	0.726647	26.2839
MKI67	9.26398e-15	3.117e-14	2.07891	-0.127481	-2.20639	2.27115	-0.02915	-2.3003	Lung adenocarcinoma	0.0471684	0.112512	0.330064	-0.241816	-0.57188	0.423706	-0.215893	-0.639599	Ovarian Cancer	5.20259e-22	2.8957e-21	1.79169	1.86845	0.0767526	1.82422	1.82901	0.00479302	2014 CPTAC CRC	6.50033e-31	8.78362e-30	0.919652	0.244004	-0.675648	0.8585	0.165	-0.6935	2019 CPTAC CRC	0.547504	0.666522	-0.235038	-3.33786	-3.10283	0	-5.54174	-5.54174	Clear Cell Renal Cell Carcinoma	6.1035e-29	1.47491e-27	0.85007	24.8351
MOV10	6.73895e-24	3.50752e-23	1.27347	0.301999	-0.971471	1.3473	0.3483	-0.999	Lung adenocarcinoma	0.00180538	0.00699526	0.225127	0.149481	-0.075646	0.243433	0.160636	-0.0827967	Ovarian Cancer	1.51017e-06	2.95362e-06	0.804568	1.46897	0.664405	0.755996	1.38405	0.628052	2014 CPTAC CRC	2.46248e-05	6.48754e-05	0.163372	0.0758629	-0.087509	0.143	0.0431	-0.0999	2019 CPTAC CRC	4.61033e-34	2.76148e-33	-0.39425	-0.104917	0.289332	-0.42859	-0.115128	0.313462	Clear Cell Renal Cell Carcinoma	0.00801246	0.0137369	0.113558	24.6771
MYBBP1A	8.28919e-26	4.74535e-25	1.42756	0.32174	-1.10582	1.2913	0.2504	-1.0409	Lung adenocarcinoma	6.2571e-10	2.57384e-08	0.44344	0.27346	-0.16998	0.391928	0.234621	-0.157306	Ovarian Cancer	1.97268e-16	7.82755e-16	2.11185	4.10475	1.9929	2.13668	4.29388	2.1572	2014 CPTAC CRC	4.03274e-45	2.1688e-43	0.752515	0.258119	-0.494396	0.7195	0.221	-0.4985	2019 CPTAC CRC	8.53637e-54	1.62011e-52	0.532297	0.273803	-0.258494	0.544564	0.284687	-0.259877	Clear Cell Renal Cell Carcinoma	2.83616e-41	4.03151e-39	0.64456	26.4045
MYH9	3.7596e-07	8.74499e-07	-0.411074	0.0255355	0.43661	-0.4566	0.013	0.4696	Lung adenocarcinoma	0.372358	0.561415	-0.110424	0.296339	0.406763	-0.130055	0.271649	0.401704	Ovarian Cancer	0.00054965	0.000857575	0.206606	9.06352	8.85692	0.115209	9.03601	8.9208	2014 CPTAC CRC	4.49085e-29	5.28872e-28	0.452431	0.199896	-0.252535	0.4455	0.181	-0.2645	2019 CPTAC CRC	1.63416e-08	4.14827e-08	0.176869	0.201535	0.0246655	0.238245	0.217953	-0.0202921	Clear Cell Renal Cell Carcinoma	3.13811e-34	1.57984e-32	0.52992	30.9043
MYO1C	5.14614e-08	1.2583e-07	-5.99085	-4.72037	1.27048	-6.27843	-3.28783	2.9906	Lung adenocarcinoma	1.88922e-09	6.18168e-08	-1.37027	0.00277782	1.37304	-1.47607	0.00452308	1.48059	Ovarian Cancer	2.06794e-08	4.71983e-08	-0.498517	5.36537	5.86389	-0.520018	5.4187	5.93871	2014 CPTAC CRC	1.25641e-55	2.62048e-53	-1.40433	-0.656224	0.74811	-1.449	-0.677	0.772	2019 CPTAC CRC	0.325981	0.449139	-0.177058	-0.301998	-0.12494	-0.237396	-0.0875565	0.14984	Clear Cell Renal Cell Carcinoma	3.36917e-34	1.68738e-32	-0.585997	27.0192
NAT10	4.74275e-38	5.43624e-37	1.42927	0.471777	-0.957493	1.361	0.4247	-0.9363	Lung adenocarcinoma	2.19978e-06	2.10137e-05	0.369604	0.183704	-0.1859	0.38524	0.147298	-0.237942	Ovarian Cancer	7.19277e-60	4.86231e-58	3.15819	3.21722	0.0590228	3.27663	3.28142	0.00479302	2014 CPTAC CRC	3.76186e-52	5.20781e-50	0.700638	0.255385	-0.445253	0.6705	0.251	-0.4195	2019 CPTAC CRC	1.0251e-58	3.17563e-57	0.442524	0.247745	-0.194779	0.46151	0.254993	-0.206517	Clear Cell Renal Cell Carcinoma	1.45863e-20	1.39595e-19	0.433908	25.784
NCL	1.5973e-48	3.41861e-47	1.69416	0.720496	-0.973661	1.48055	0.61235	-0.8682	Lung adenocarcinoma	1.24437e-11	1.0811e-09	1.12234	-0.166401	-1.28874	1.21101	-0.160551	-1.37156	Ovarian Cancer	5.91205e-10	1.51176e-09	0.370924	6.08809	5.71716	0.312921	6.02333	5.71041	2014 CPTAC CRC	2.6477e-39	7.60107e-38	0.834545	0.249319	-0.585226	0.896	0.307	-0.589	2019 CPTAC CRC	4.55795e-23	1.90145e-22	0.258695	0.250955	-0.00773972	0.318019	0.276465	-0.0415538	Clear Cell Renal Cell Carcinoma	1.98416e-08	5.92125e-08	0.261786	29.8268
NCOA5	2.8122e-17	1.06814e-16	0.572012	0.226909	-0.345103	0.50255	0.17025	-0.3323	Lung adenocarcinoma	1.61192e-07	2.33741e-06	0.328283	0.0480835	-0.2802	0.337184	0.0453658	-0.291818	Ovarian Cancer	5.32932e-08	1.17106e-07	0.723889	1.17386	0.449968	0.928701	1.19113	0.262427	2014 CPTAC CRC	2.66299e-24	2.2331e-23	0.398606	0.164499	-0.234107	0.3455	0.117	-0.2285	2019 CPTAC CRC	0.283985	0.400756	0.252301	-0.283547	-0.535849	0.212178	0.156473	-0.0557051	Clear Cell Renal Cell Carcinoma	2.30881e-16	1.43702e-15	0.296745	25.2191
NKRF	NA	NA	NA	NA	NA	NA	NA	NA	NA	NA	NA	NA	NA	NA	NA	NA	NA	NA	NA	NA	NA	NA	NA	NA	NA	NA	NA	NA	NA	NA	NA	NA	NA	NA	NA	NA	NA	NA	NA	NA	NA	NA	NA	NA	NA	NA	NA	NA	NA
NOC4L	NA	NA	NA	NA	NA	NA	NA	NA	NA	NA	NA	NA	NA	NA	NA	NA	NA	NA	NA	NA	NA	NA	NA	NA	NA	NA	NA	NA	NA	NA	NA	NA	NA	NA	NA	NA	NA	NA	NA	NA	NA	NA	NA	NA	NA	NA	NA	NA	NA
NOL6	1.44544e-30	1.05978e-29	1.28004	0.371985	-0.908059	1.14455	0.23055	-0.914	Lung adenocarcinoma	0.708999	0.828309	0.0258546	-0.00822199	-0.0340766	0.0822541	-0.0190489	-0.101303	Ovarian Cancer	1.19311e-37	2.14299e-36	2.02854	2.05541	0.026864	2.30215	2.30694	0.00479302	2014 CPTAC CRC	2.15583e-37	5.07029e-36	0.554567	0.205067	-0.3495	0.5765	0.185	-0.3915	2019 CPTAC CRC	2.08526e-44	2.11782e-43	0.350638	0.223597	-0.127041	0.374433	0.221627	-0.152806	Clear Cell Renal Cell Carcinoma	4.59207e-14	2.29984e-13	0.245458	24.5737
NONO	NA	NA	NA	NA	NA	NA	NA	NA	NA	NA	NA	NA	NA	NA	NA	NA	NA	NA	NA	NA	NA	NA	NA	NA	NA	NA	NA	NA	NA	NA	NA	NA	NA	NA	NA	NA	NA	NA	NA	NA	NA	NA	NA	NA	NA	NA	NA	NA	NA
NOP2	8.42745e-31	6.26803e-30	2.25268	0.417603	-1.83507	2.212	0.467	-1.745	Lung adenocarcinoma	0.0026453	0.00974035	0.382654	-0.00684405	-0.389498	0.344301	-0.0659943	-0.410295	Ovarian Cancer	4.25117e-16	1.63791e-15	1.90049	3.37919	1.4787	2.00281	3.50441	1.5016	2014 CPTAC CRC	3.6731e-57	1.18524e-54	0.815787	0.292777	-0.52301	0.785	0.272	-0.513	2019 CPTAC CRC	8.36323e-25	3.66106e-24	0.33584	0.194647	-0.141193	0.362168	0.186922	-0.175246	Clear Cell Renal Cell Carcinoma	5.24768e-38	4.26252e-36	0.729621	25.4791
NOP56	3.50457e-32	2.80692e-31	1.24137	0.521715	-0.719658	1.10095	0.39575	-0.7052	Lung adenocarcinoma	2.92453e-11	2.13793e-09	0.506946	0.183734	-0.323213	0.494633	0.13704	-0.357594	Ovarian Cancer	1.26317e-08	2.92797e-08	0.718089	4.7122	3.99411	0.630152	4.73037	4.10021	2014 CPTAC CRC	1.79752e-44	9.11987e-43	0.654076	0.244896	-0.40918	0.609	0.208	-0.401	2019 CPTAC CRC	1.21757e-34	7.48046e-34	0.295765	0.206195	-0.0895704	0.3176	0.212328	-0.105272	Clear Cell Renal Cell Carcinoma	1.03124e-19	8.99633e-19	0.287224	26.7855
NOP58	1.72645e-43	2.7316e-42	1.51038	0.578552	-0.931832	1.35625	0.46565	-0.8906	Lung adenocarcinoma	9.24049e-07	1.00895e-05	0.484872	0.160066	-0.324806	0.537563	0.169236	-0.368326	Ovarian Cancer	4.7024e-09	1.12724e-08	0.453937	4.18205	3.72811	0.438607	4.21387	3.77526	2014 CPTAC CRC	1.49785e-49	1.42155e-47	0.629239	0.248014	-0.381225	0.596	0.201	-0.395	2019 CPTAC CRC	2.51533e-27	1.20174e-26	0.260448	0.18737	-0.0730782	0.260856	0.177791	-0.0830647	Clear Cell Renal Cell Carcinoma	3.81728e-23	4.84223e-22	0.278531	26.8572
NPM1	1.76242e-19	7.42088e-19	0.866196	0.248111	-0.618085	0.8689	0.2188	-0.6501	Lung adenocarcinoma	8.12811e-10	3.15546e-08	0.91052	-0.131923	-1.04244	1.03626	-0.101061	-1.13732	Ovarian Cancer	1.47721e-59	9.46942e-58	5.38187	5.50079	0.118918	5.44883	5.45362	0.00479302	2014 CPTAC CRC	2.92662e-45	1.60606e-43	0.920702	0.238132	-0.68257	0.978	0.251	-0.727	2019 CPTAC CRC	2.25767e-06	5.25593e-06	0.315668	0.177011	-0.138657	0.26305	0.216101	-0.0469486	Clear Cell Renal Cell Carcinoma	0.396753	0.506406	0.0296915	29.6014
NPM3	NA	NA	NA	NA	NA	NA	NA	NA	NA	NA	NA	NA	NA	NA	NA	NA	NA	NA	NA	NA	NA	NA	NA	NA	NA	NA	NA	NA	NA	NA	NA	NA	NA	NA	NA	NA	NA	NA	NA	NA	NA	NA	NA	NA	NA	NA	NA	NA	NA
PA2G4	8.84723e-18	3.42598e-17	0.667243	0.394603	-0.272641	0.6452	0.3686	-0.2766	Lung adenocarcinoma	2.21943e-07	3.02672e-06	0.380821	0.0825802	-0.298241	0.32124	0.0623514	-0.258889	Ovarian Cancer	0.057166	0.0710847	0.143578	5.08078	4.9372	0.124672	5.14295	5.01827	2014 CPTAC CRC	3.50007e-36	7.44989e-35	0.485424	0.209603	-0.275821	0.48	0.187	-0.293	2019 CPTAC CRC	5.24591e-51	7.95721e-50	0.300782	0.222001	-0.078781	0.289021	0.204821	-0.0842	Clear Cell Renal Cell Carcinoma	0.0324101	0.0517214	0.0681327	28.4276
PABPC1	2.57604e-64	1.62039e-62	1.76274	0.623601	-1.13914	1.84825	0.67105	-1.1772	Lung adenocarcinoma	3.5864e-22	1.80719e-18	0.653086	0.0424007	-0.610685	0.658477	0.0514333	-0.607044	Ovarian Cancer	3.40853e-14	1.14687e-13	0.566895	5.53104	4.96415	0.611163	5.57632	4.96516	2014 CPTAC CRC	3.73289e-41	1.2706e-39	0.529958	0.229168	-0.30079	0.5085	0.211	-0.2975	2019 CPTAC CRC	8.65774e-24	3.67726e-23	0.180329	0.14706	-0.0332691	0.178588	0.144616	-0.0339716	Clear Cell Renal Cell Carcinoma	6.86545e-11	2.55531e-10	0.226929	28.9834
PABPC4	2.86855e-32	2.30647e-31	2.15452	0.551617	-1.6029	2.0031	0.4801	-1.523	Lung adenocarcinoma	4.71972e-11	3.09054e-09	0.743035	0.0740192	-0.669015	0.771492	0.0335935	-0.737898	Ovarian Cancer	5.01361e-117	1.86406e-113	4.26291	4.29585	0.0329339	4.26424	4.26903	0.00479302	2014 CPTAC CRC	5.10288e-23	3.92047e-22	0.410793	0.169998	-0.240795	0.388	0.179	-0.209	2019 CPTAC CRC	0.310687	0.431879	-0.180153	-0.288507	-0.108354	-0.159338	-0.0248432	0.134495	Clear Cell Renal Cell Carcinoma	3.67234e-05	8.06379e-05	0.155311	28.5002
PARP1	3.17304e-41	4.38194e-40	1.96246	0.612149	-1.35031	2.04165	0.67625	-1.3654	Lung adenocarcinoma	1.48852e-12	2.05497e-10	0.818045	0.130487	-0.687558	0.823311	0.0742652	-0.749045	Ovarian Cancer	0.000682893	0.00105791	0.29344	5.10873	4.81529	0.266734	5.11575	4.84902	2014 CPTAC CRC	1.18008e-14	5.49637e-14	0.352394	0.152515	-0.199879	0.3785	0.142	-0.2365	2019 CPTAC CRC	6.76079e-20	2.52532e-19	0.244625	0.189735	-0.0548902	0.270759	0.186691	-0.0840686	Clear Cell Renal Cell Carcinoma	1.3221e-12	5.7102e-12	0.414434	27.7009
PCBP1	NA	NA	NA	NA	NA	NA	NA	NA	NA	NA	NA	NA	NA	NA	NA	NA	NA	NA	NA	NA	NA	NA	NA	NA	NA	NA	NA	NA	NA	NA	NA	NA	NA	NA	NA	NA	NA	NA	NA	NA	NA	NA	NA	NA	NA	NA	NA	NA	NA
PCBP2	0.00450199	0.0081967	0.320271	-0.0694636	-0.389735	0.41025	-0.034	-0.44425	Lung adenocarcinoma	4.16035e-07	5.13194e-06	0.432287	0.157017	-0.27527	0.374415	0.146105	-0.22831	Ovarian Cancer	8.89301e-16	3.34658e-15	0.799798	5.05722	4.25742	0.753095	5.0057	4.2526	2014 CPTAC CRC	4.43635e-16	2.24096e-15	0.284784	0.129929	-0.154855	0.265	0.11	-0.155	2019 CPTAC CRC	1.86703e-15	6.00465e-15	0.277604	0.258575	-0.0190296	0.279285	0.249943	-0.0293418	Clear Cell Renal Cell Carcinoma	0.487439	0.59784	0.0167603	28.0171
PDCD11	1.6947e-38	1.97543e-37	1.55281	0.43811	-1.1147	1.49055	0.34185	-1.1487	Lung adenocarcinoma	0.00227631	0.00854402	0.237028	0.168449	-0.0685796	0.229623	0.114428	-0.115195	Ovarian Cancer	5.65012e-28	4.73134e-27	2.33775	3.39164	1.05389	2.39619	3.34972	0.95353	2014 CPTAC CRC	4.31747e-51	5.19837e-49	0.638029	0.242208	-0.395821	0.6055	0.215	-0.3905	2019 CPTAC CRC	1.31458e-60	4.78064e-59	0.452258	0.254929	-0.197329	0.466187	0.255652	-0.210535	Clear Cell Renal Cell Carcinoma	4.54377e-21	4.58456e-20	0.354544	25.053
PFN1	1.1344e-06	2.56971e-06	-0.338866	0.0165764	0.355443	-0.26805	0.02165	0.2897	Lung adenocarcinoma	0.019957	0.0548028	0.289855	0.0133312	-0.276523	0.260329	-0.0147007	-0.27503	Ovarian Cancer	1.73977e-27	1.40618e-26	-0.577966	7.23728	7.81525	-0.581548	7.24105	7.8226	2014 CPTAC CRC	1.51868e-21	1.05979e-20	-0.763869	-0.374172	0.389697	-0.7135	-0.321	0.3925	2019 CPTAC CRC	2.35088e-65	1.47213e-63	0.550653	0.289439	-0.261215	0.558127	0.284208	-0.273919	Clear Cell Renal Cell Carcinoma	7.02428e-25	1.08984e-23	0.357731	30.2286
PGAM5	2.78985e-12	8.39071e-12	1.12365	0.167129	-0.956523	0.9901	0.04935	-0.94075	Lung adenocarcinoma	0.0789393	0.171492	0.148208	0.0115241	-0.136684	0.0905367	-0.0287291	-0.119266	Ovarian Cancer	4.41514e-47	1.51995e-45	2.43044	2.50223	0.0717835	2.58655	2.59135	0.00479302	2014 CPTAC CRC	1.22826e-31	1.74137e-30	0.602976	0.205676	-0.3973	0.5935	0.172	-0.4215	2019 CPTAC CRC	1.97392e-28	9.7943e-28	-0.637148	-0.2736	0.363548	-0.706963	-0.284885	0.422078	Clear Cell Renal Cell Carcinoma	1.13764e-10	4.14802e-10	0.263056	25.7798
PHGDH	3.65496e-05	7.62324e-05	-0.922162	-0.531662	0.3905	-1.4465	-1.0455	0.401	Lung adenocarcinoma	0.371073	0.560318	-0.107048	0.146372	0.25342	-0.0683396	0.189789	0.258128	Ovarian Cancer	0.000120657	0.000198849	0.780057	3.4565	2.67645	0.867871	3.65951	2.79164	2014 CPTAC CRC	1.86539e-06	5.32301e-06	-0.423887	-0.253003	0.170884	-0.462	-0.254	0.208	2019 CPTAC CRC	7.3282e-41	5.99673e-40	-1.15083	-0.636087	0.51474	-1.1569	-0.65743	0.499471	Clear Cell Renal Cell Carcinoma	1.70878e-13	8.1245e-13	-0.728428	27.0755
PLEC	8.93016e-12	2.61938e-11	-0.8242	-0.210799	0.613401	-0.90385	-0.29195	0.6119	Lung adenocarcinoma	0.426191	0.610577	-0.0687644	0.093506	0.16227	-0.0038243	0.0985527	0.102377	Ovarian Cancer	0.00239538	0.00350631	-0.199397	8.34542	8.54482	-0.300482	8.26541	8.56589	2014 CPTAC CRC	0.00144996	0.00328933	-0.129607	0.00276598	0.132373	-0.0835	0.0365	0.12	2019 CPTAC CRC	1.47453e-06	3.45887e-06	0.126312	0.0984403	-0.0278716	0.144742	0.112693	-0.032049	Clear Cell Renal Cell Carcinoma	3.06115e-06	7.43631e-06	0.24498	29.9478
PLRG1	NA	NA	NA	NA	NA	NA	NA	NA	NA	NA	NA	NA	NA	NA	NA	NA	NA	NA	NA	NA	NA	NA	NA	NA	NA	NA	NA	NA	NA	NA	NA	NA	NA	NA	NA	NA	NA	NA	NA	NA	NA	NA	NA	NA	NA	NA	NA	NA	NA
POP1	NA	NA	NA	NA	NA	NA	NA	NA	NA	NA	NA	NA	NA	NA	NA	NA	NA	NA	NA	NA	NA	NA	NA	NA	NA	NA	NA	NA	NA	NA	NA	NA	NA	NA	NA	NA	NA	NA	NA	NA	NA	NA	NA	NA	NA	NA	NA	NA	NA
PPP2R1A	2.008e-34	1.84293e-33	-0.7128	-0.112437	0.600362	-0.73125	-0.08365	0.6476	Lung adenocarcinoma	0.285245	0.466824	-0.0532175	0.321233	0.37445	-0.0448281	0.293095	0.337923	Ovarian Cancer	3.42229e-06	6.48196e-06	0.357499	5.63264	5.27514	0.350068	5.66552	5.31546	2014 CPTAC CRC	6.9542e-10	2.47571e-09	-0.116977	0.0185113	0.135488	-0.1214	0.0076	0.129	2019 CPTAC CRC	0.107608	0.171557	0.0218493	0.112344	0.0904951	0.0197152	0.11332	0.093605	Clear Cell Renal Cell Carcinoma	5.19101e-12	2.11625e-11	-0.204351	28.6003
PRDX1	0.263574	0.385842	-0.105571	-0.0190273	0.0865436	-0.2395	-0.1531	0.0864	Lung adenocarcinoma	0.00490912	0.0167312	0.231611	0.173978	-0.0576329	0.237896	0.138288	-0.0996084	Ovarian Cancer	1.97382e-12	5.93744e-12	-0.309655	6.45491	6.76456	-0.351424	6.41517	6.76659	2014 CPTAC CRC	0.0337741	0.0628501	0.0662414	0.0358124	-0.030429	0.0411	0.0006	-0.0405	2019 CPTAC CRC	7.64834e-10	2.04573e-09	-0.195694	-0.0136362	0.182058	-0.221584	-0.0186176	0.202967	Clear Cell Renal Cell Carcinoma	2.12928e-14	1.0971e-13	-0.304734	30.6143
PRKDC	6.1864e-47	1.20413e-45	1.4957	0.544547	-0.951152	1.5117	0.58	-0.9317	Lung adenocarcinoma	7.32739e-13	1.08596e-10	0.609593	0.393786	-0.215807	0.608271	0.395737	-0.212534	Ovarian Cancer	7.10312e-31	7.23545e-30	5.42256	7.21324	1.79069	5.30389	7.20611	1.90222	2014 CPTAC CRC	3.99244e-41	1.3495e-39	0.623003	0.245372	-0.377631	0.647	0.265	-0.382	2019 CPTAC CRC	0.359927	0.48686	0.0187014	0.0944452	0.0757439	0.0638723	0.10084	0.0369674	Clear Cell Renal Cell Carcinoma	5.82799e-37	4.08212e-35	0.597872	28.2122
PRPF19	NA	NA	NA	NA	NA	NA	NA	NA	NA	NA	NA	NA	NA	NA	NA	NA	NA	NA	NA	NA	NA	NA	NA	NA	NA	NA	NA	NA	NA	NA	NA	NA	NA	NA	NA	NA	NA	NA	NA	NA	NA	NA	NA	NA	NA	NA	NA	NA	NA
PRPF3	5.89522e-43	9.04986e-42	1.22655	0.426039	-0.800515	1.1804	0.3757	-0.8047	Lung adenocarcinoma	9.25778e-06	7.21577e-05	0.28815	-0.0174354	-0.305585	0.250736	-0.0438804	-0.294616	Ovarian Cancer	1.15387e-10	3.10427e-10	1.01886	1.63657	0.617707	1.08491	1.6794	0.594491	2014 CPTAC CRC	1.2199e-28	1.40184e-27	0.421375	0.179353	-0.242022	0.4265	0.168	-0.2585	2019 CPTAC CRC	2.46434e-06	5.72796e-06	0.0705134	0.141642	0.071129	0.0827589	0.136039	0.0532802	Clear Cell Renal Cell Carcinoma	6.7187e-24	9.3175e-23	0.351012	24.9586
PRPF4	8.35898e-34	7.37649e-33	0.926555	0.388837	-0.537718	0.86005	0.33695	-0.5231	Lung adenocarcinoma	0.000136636	0.000745141	0.239097	0.150691	-0.088407	0.213641	0.124463	-0.089178	Ovarian Cancer	6.03236e-06	1.11974e-05	0.627692	2.69592	2.06823	0.625355	2.80185	2.17649	2014 CPTAC CRC	4.78529e-38	1.20258e-36	0.397628	0.180712	-0.216916	0.377	0.164	-0.213	2019 CPTAC CRC	0.000374654	0.000774302	0.0614864	0.135701	0.0742146	0.0773965	0.130054	0.0526575	Clear Cell Renal Cell Carcinoma	1.77958e-16	1.12281e-15	0.292829	25.2861
PRPF40A	3.07775e-49	6.91722e-48	1.93145	0.653976	-1.27748	1.9418	0.6828	-1.259	Lung adenocarcinoma	3.90537e-13	7.09107e-11	0.529402	0.140203	-0.389199	0.500002	0.117392	-0.38261	Ovarian Cancer	7.4978e-09	1.76324e-08	0.789168	2.62669	1.83752	0.735596	2.65459	1.91899	2014 CPTAC CRC	1.57054e-30	2.06344e-29	0.481202	0.229639	-0.251563	0.5215	0.241	-0.2805	2019 CPTAC CRC	0.000446376	0.000917833	-0.0651649	0.0954263	0.160591	-0.0690951	0.0834384	0.152533	Clear Cell Renal Cell Carcinoma	1.60736e-19	1.36888e-18	0.290378	26.0343
PRPF8	3.96383e-35	3.81445e-34	0.758692	0.341447	-0.417245	0.77525	0.37525	-0.4	Lung adenocarcinoma	5.71424e-08	9.99794e-07	0.38221	0.325856	-0.0563543	0.40202	0.294486	-0.107534	Ovarian Cancer	1.68513e-10	4.47843e-10	0.974545	5.28743	4.31288	1.03553	5.3662	4.33067	2014 CPTAC CRC	7.54637e-54	1.26826e-51	0.434014	0.195918	-0.238096	0.4405	0.201	-0.2395	2019 CPTAC CRC	1.79156e-09	4.71442e-09	0.0927831	0.135994	0.0432108	0.120145	0.138902	0.0187564	Clear Cell Renal Cell Carcinoma	8.34639e-26	1.40796e-24	0.384747	26.7916
PSIP1	4.75388e-15	1.6228e-14	-1.03614	-0.281717	0.754428	-1.13055	-0.28445	0.8461	Lung adenocarcinoma	0.000161585	0.000863444	0.349086	-0.212149	-0.561235	0.331786	-0.23524	-0.567026	Ovarian Cancer	0.00191826	0.00283244	0.465475	2.24251	1.77703	0.426374	2.39938	1.97301	2014 CPTAC CRC	0.243531	0.343815	-0.0452345	0.000117526	0.045352	-0.0122	0.035	0.0472	2019 CPTAC CRC	0.0131771	0.02411	0.0789322	0.142679	0.063747	0.143734	0.172672	0.0289377	Clear Cell Renal Cell Carcinoma	2.34469e-07	6.35908e-07	-0.295826	25.7864
PTBP1	NA	NA	NA	NA	NA	NA	NA	NA	NA	NA	NA	NA	NA	NA	NA	NA	NA	NA	NA	NA	NA	NA	NA	NA	NA	NA	NA	NA	NA	NA	NA	NA	NA	NA	NA	NA	NA	NA	NA	NA	NA	NA	NA	NA	NA	NA	NA	NA	NA
PWP1	NA	NA	NA	NA	NA	NA	NA	NA	NA	NA	NA	NA	NA	NA	NA	NA	NA	NA	NA	NA	NA	NA	NA	NA	NA	NA	NA	NA	NA	NA	NA	NA	NA	NA	NA	NA	NA	NA	NA	NA	NA	NA	NA	NA	NA	NA	NA	NA	NA
PWP2	3.44052e-26	2.0007e-25	1.10821	0.371433	-0.736777	1.1517	0.3794	-0.7723	Lung adenocarcinoma	3.01218e-06	2.73484e-05	0.509268	0.258922	-0.250346	0.496762	0.241949	-0.254813	Ovarian Cancer	3.58392e-13	1.12447e-12	1.148	1.76702	0.619016	1.18198	1.82781	0.645834	2014 CPTAC CRC	1.20535e-36	2.69351e-35	0.589925	0.250833	-0.339092	0.5865	0.237	-0.3495	2019 CPTAC CRC	2.85105e-39	2.1533e-38	0.318157	0.209086	-0.109071	0.31771	0.19449	-0.12322	Clear Cell Renal Cell Carcinoma	6.31132e-23	7.84129e-22	0.402184	24.3359
RAB7A	0.00234788	0.00436016	-0.273378	0.0859018	0.35928	-0.37285	-5e-05	0.3728	Lung adenocarcinoma	0.000410741	0.00192981	0.249061	0.354694	0.105633	0.234655	0.342042	0.107387	Ovarian Cancer	0.660704	0.690803	-0.023967	4.87291	4.89687	0.0140058	4.88834	4.87433	2014 CPTAC CRC	9.17141e-09	3.04218e-08	0.135788	0.113956	-0.021832	0.11885	0.0994	-0.01945	2019 CPTAC CRC	0.0160141	0.0290557	-0.0597257	0.0605479	0.120274	-0.0656142	0.0683091	0.133923	Clear Cell Renal Cell Carcinoma	6.8908e-21	6.83844e-20	0.369628	27.9629
RAC2	NA	NA	NA	NA	NA	NA	NA	NA	NA	NA	NA	NA	NA	NA	NA	NA	NA	NA	NA	NA	NA	NA	NA	NA	NA	NA	NA	NA	NA	NA	NA	NA	NA	NA	NA	NA	NA	NA	NA	NA	NA	NA	NA	NA	NA	NA	NA	NA	NA
RALY	3.91542e-19	1.62738e-18	0.870382	0.533584	-0.336798	0.9047	0.5272	-0.3775	Lung adenocarcinoma	3.26601e-07	4.20906e-06	0.565302	-0.264144	-0.829446	0.527579	-0.257091	-0.78467	Ovarian Cancer	1.35745e-75	2.40333e-73	4.12419	4.24669	0.122505	4.24186	4.24666	0.00479302	2014 CPTAC CRC	3.56099e-28	3.91903e-27	0.652031	0.2215	-0.430531	0.662	0.232	-0.43	2019 CPTAC CRC	0.898892	0.928548	-0.0470146	-3.89385	-3.84683	0	-5.54174	-5.54174	Clear Cell Renal Cell Carcinoma	1.07204e-08	3.27403e-08	0.238927	27.8047
RARS	6.8518e-44	1.10789e-42	1.35853	0.594979	-0.763547	1.30515	0.55965	-0.7455	Lung adenocarcinoma	7.03254e-10	2.82366e-08	0.382363	0.288949	-0.0934141	0.340084	0.237561	-0.102523	Ovarian Cancer	0.0119446	0.0162317	0.134864	5.16987	5.03501	0.168321	5.24716	5.07884	2014 CPTAC CRC	1.91103e-22	1.40788e-21	0.25774	0.142224	-0.115516	0.2815	0.156	-0.1255	2019 CPTAC CRC	0.00358443	0.00688206	-0.0544401	0.0584228	0.112863	-0.0876297	0.0409172	0.128547	Clear Cell Renal Cell Carcinoma	3.74319e-05	8.21134e-05	0.132014	27.2395
RBBP4	6.75982e-37	7.27157e-36	0.90276	0.465271	-0.437489	0.92465	0.47395	-0.4507	Lung adenocarcinoma	8.30992e-11	4.89751e-09	0.640536	0.0134871	-0.627049	0.658151	0.0340629	-0.624088	Ovarian Cancer	0.000374322	0.000590967	-0.323729	3.33022	3.65395	-0.276676	3.39523	3.6719	2014 CPTAC CRC	2.68826e-15	1.30169e-14	0.30217	0.140632	-0.161538	0.2895	0.134	-0.1555	2019 CPTAC CRC	0.00897789	0.0166716	0.445779	0.0696906	-0.376089	0.442387	0.268794	-0.173593	Clear Cell Renal Cell Carcinoma	1.43711e-07	3.97457e-07	0.208108	28.0382
RBBP6	NA	NA	NA	NA	NA	NA	NA	NA	NA	NA	NA	NA	NA	NA	NA	NA	NA	NA	NA	NA	NA	NA	NA	NA	NA	NA	NA	NA	NA	NA	NA	NA	NA	NA	NA	NA	NA	NA	NA	NA	NA	NA	NA	NA	NA	NA	NA	NA	NA
RBM14	NA	NA	NA	NA	NA	NA	NA	NA	NA	NA	NA	NA	NA	NA	NA	NA	NA	NA	NA	NA	NA	NA	NA	NA	NA	NA	NA	NA	NA	NA	NA	NA	NA	NA	NA	NA	NA	NA	NA	NA	NA	NA	NA	NA	NA	NA	NA	NA	NA
RBM15	1.6781e-32	1.36202e-31	0.840214	0.339127	-0.501087	0.8343	0.3245	-0.5098	Lung adenocarcinoma	0.046687	0.111601	0.125403	-0.129308	-0.254711	0.125601	-0.129965	-0.255567	Ovarian Cancer	0.000904228	0.00138465	0.53546	1.49289	0.957433	0.569761	1.48542	0.915662	2014 CPTAC CRC	4.00113e-22	2.88446e-21	0.246958	0.0927722	-0.154186	0.2558	0.0923	-0.1635	2019 CPTAC CRC	4.21561e-28	2.06547e-27	0.189638	0.173298	-0.0163398	0.206105	0.168858	-0.0372469	Clear Cell Renal Cell Carcinoma	6.2721e-34	3.00129e-32	0.355695	24.7313
RBM25	9.7162e-69	9.36751e-67	1.55745	0.614892	-0.94256	1.5856	0.6585	-0.9271	Lung adenocarcinoma	7.19927e-06	5.79506e-05	0.35588	0.0663563	-0.289523	0.398252	0.0610467	-0.337205	Ovarian Cancer	2.60901e-05	4.57993e-05	0.650049	2.3721	1.72205	0.536173	2.43338	1.89721	2014 CPTAC CRC	2.64789e-28	2.93817e-27	0.38198	0.1887	-0.19328	0.361	0.16	-0.201	2019 CPTAC CRC	0.016462	0.0298083	-0.0438449	0.117697	0.161542	-0.0143662	0.123672	0.138038	Clear Cell Renal Cell Carcinoma	1.86085e-20	1.76689e-19	0.383934	26.4774
RBM39	4.13843e-34	3.71882e-33	0.831823	0.358275	-0.473549	0.7931	0.3433	-0.4498	Lung adenocarcinoma	1.43039e-08	3.16696e-07	0.5404	0.119091	-0.421309	0.610542	0.0936907	-0.516851	Ovarian Cancer	1.20136e-09	2.99574e-09	0.509428	3.91614	3.40671	0.508992	3.90737	3.39838	2014 CPTAC CRC	5.14628e-44	2.48593e-42	0.498243	0.189029	-0.309214	0.489	0.185	-0.304	2019 CPTAC CRC	0.717376	0.797099	-0.00526694	0.118148	0.123415	-0.00384541	0.111634	0.11548	Clear Cell Renal Cell Carcinoma	2.27721e-08	6.75614e-08	0.165676	26.4737
RBM4	6.01406e-52	1.59677e-50	1.36429	0.506	-0.858291	1.25065	0.45665	-0.794	Lung adenocarcinoma	0.240722	0.41049	0.137337	-0.0722871	-0.209624	0.27376	-0.105619	-0.379379	Ovarian Cancer	3.92235e-42	9.00204e-41	1.82785	1.83837	0.0105201	1.8762	1.881	0.00479302	2014 CPTAC CRC	0.295539	0.403335	-0.0573716	-0.0035866	0.053785	0.04295	0.0382	-0.00475	2019 CPTAC CRC	0.440877	0.570302	0.0162276	0.100736	0.0845084	-0.0106529	0.0856634	0.0963163	Clear Cell Renal Cell Carcinoma	2.05694e-22	2.42172e-21	0.397787	26.3286
RBMX	2.95952e-46	5.5109e-45	1.26771	0.503406	-0.764303	1.2458	0.5044	-0.7414	Lung adenocarcinoma	3.36308e-11	2.35369e-09	0.752705	-0.191991	-0.944696	0.810891	-0.154367	-0.965258	Ovarian Cancer	2.97224e-16	1.15958e-15	1.04621	5.08597	4.03976	1.09975	5.17924	4.07949	2014 CPTAC CRC	2.72089e-31	3.77787e-30	0.543056	0.189466	-0.35359	0.5635	0.203	-0.3605	2019 CPTAC CRC	0.00775548	0.0144751	0.0526689	0.136817	0.0841482	0.0862111	0.139732	0.0535211	Clear Cell Renal Cell Carcinoma	3.99308e-26	6.91705e-25	0.38613	28.3405
RCC2	2.6959e-22	1.29836e-21	0.951276	0.380369	-0.570907	0.7961	0.2391	-0.557	Lung adenocarcinoma	1.51427e-10	7.7466e-09	0.635168	0.0816391	-0.553529	0.632656	0.0550859	-0.57757	Ovarian Cancer	3.76971e-06	7.10739e-06	0.589958	4.04684	3.45688	0.488614	4.10642	3.61781	2014 CPTAC CRC	9.09946e-43	3.74517e-41	0.710813	0.237743	-0.47307	0.7485	0.243	-0.5055	2019 CPTAC CRC	1.54914e-33	9.08842e-33	0.403192	0.250619	-0.152573	0.424416	0.236085	-0.188331	Clear Cell Renal Cell Carcinoma	2.18553e-22	2.56375e-21	0.473812	27.3584
RNASEH1	NA	NA	NA	NA	NA	NA	NA	NA	NA	NA	NA	NA	NA	NA	NA	NA	NA	NA	NA	NA	NA	NA	NA	NA	NA	NA	NA	NA	NA	NA	NA	NA	NA	NA	NA	NA	NA	NA	NA	NA	NA	NA	NA	NA	NA	NA	NA	NA	NA
RNASEH2A	NA	NA	NA	NA	NA	NA	NA	NA	NA	NA	NA	NA	NA	NA	NA	NA	NA	NA	NA	NA	NA	NA	NA	NA	NA	NA	NA	NA	NA	NA	NA	NA	NA	NA	NA	NA	NA	NA	NA	NA	NA	NA	NA	NA	NA	NA	NA	NA	NA
RNASEH2B	NA	NA	NA	NA	NA	NA	NA	NA	NA	NA	NA	NA	NA	NA	NA	NA	NA	NA	NA	NA	NA	NA	NA	NA	NA	NA	NA	NA	NA	NA	NA	NA	NA	NA	NA	NA	NA	NA	NA	NA	NA	NA	NA	NA	NA	NA	NA	NA	NA
RNASEH2C	NA	NA	NA	NA	NA	NA	NA	NA	NA	NA	NA	NA	NA	NA	NA	NA	NA	NA	NA	NA	NA	NA	NA	NA	NA	NA	NA	NA	NA	NA	NA	NA	NA	NA	NA	NA	NA	NA	NA	NA	NA	NA	NA	NA	NA	NA	NA	NA	NA
RTCB	NA	NA	NA	NA	NA	NA	NA	NA	NA	NA	NA	NA	NA	NA	NA	NA	NA	NA	NA	NA	NA	NA	NA	NA	NA	NA	NA	NA	NA	NA	NA	NA	NA	NA	NA	NA	NA	NA	NA	NA	NA	NA	NA	NA	NA	NA	NA	NA	NA
RUVBL2	5.96742e-05	0.000122874	0.281887	0.220474	-0.0614139	0.30215	0.20175	-0.1004	Lung adenocarcinoma	0.0297465	0.0763201	0.214129	-0.0517829	-0.265912	0.239069	-0.0618724	-0.300941	Ovarian Cancer	5.24922e-10	1.3525e-09	0.762858	4.51065	3.74779	0.807475	4.5245	3.71703	2014 CPTAC CRC	1.93452e-28	2.17654e-27	0.417668	0.200841	-0.216827	0.416	0.197	-0.219	2019 CPTAC CRC	2.93117e-11	8.24304e-11	0.104247	0.142214	0.0379664	0.121821	0.145091	0.0232705	Clear Cell Renal Cell Carcinoma	2.1366e-14	1.10029e-13	0.229789	26.9515
SAFB	2.77466e-37	3.0418e-36	0.899837	0.434022	-0.465815	0.73995	0.36105	-0.3789	Lung adenocarcinoma	3.06879e-06	2.78123e-05	0.39068	-0.0634031	-0.454083	0.433446	-0.0260286	-0.459474	Ovarian Cancer	1.05953e-14	3.72337e-14	1.18214	3.40099	2.21885	1.14027	3.36691	2.22663	2014 CPTAC CRC	4.25361e-33	6.86278e-32	0.437981	0.190719	-0.247262	0.439	0.198	-0.241	2019 CPTAC CRC	0.421814	0.551142	-0.0154547	0.127019	0.142473	0.0326497	0.139641	0.106992	Clear Cell Renal Cell Carcinoma	8.80962e-23	1.07247e-21	0.343434	27.1033
SART1	9.0678e-52	2.35626e-50	1.18646	0.481944	-0.704517	1.1838	0.5099	-0.6739	Lung adenocarcinoma	6.38461e-05	0.000387615	0.319061	-0.27245	-0.591511	0.33836	-0.235644	-0.574005	Ovarian Cancer	0.000111354	0.000184416	0.622214	2.62028	1.99806	0.533675	2.64151	2.10783	2014 CPTAC CRC	1.89767e-22	1.39931e-21	0.264352	0.118133	-0.146219	0.2525	0.104	-0.1485	2019 CPTAC CRC	2.01466e-10	5.49028e-10	0.108355	0.155725	0.0473697	0.127733	0.150073	0.0223404	Clear Cell Renal Cell Carcinoma	1.47446e-20	1.40971e-19	0.311671	26.2941
SART3	NA	NA	NA	NA	NA	NA	NA	NA	NA	NA	NA	NA	NA	NA	NA	NA	NA	NA	NA	NA	NA	NA	NA	NA	NA	NA	NA	NA	NA	NA	NA	NA	NA	NA	NA	NA	NA	NA	NA	NA	NA	NA	NA	NA	NA	NA	NA	NA	NA
SERBP1	1.53324e-48	3.28834e-47	1.53184	0.55286	-0.978985	1.4978	0.5518	-0.946	Lung adenocarcinoma	2.57444e-09	7.83843e-08	0.498321	-0.0390757	-0.537397	0.48476	-0.0570884	-0.541848	Ovarian Cancer	1.20399e-83	3.73035e-81	4.56267	4.57319	0.0105201	4.68765	4.69244	0.00479302	2014 CPTAC CRC	7.70804e-28	8.24678e-27	0.404225	0.172352	-0.231873	0.4205	0.173	-0.2475	2019 CPTAC CRC	2.69393e-06	6.25414e-06	0.115617	0.118431	0.00281418	0.126445	0.121938	-0.00450676	Clear Cell Renal Cell Carcinoma	0.428425	0.539845	0.0306609	28.9949
SETX	NA	NA	NA	NA	NA	NA	NA	NA	NA	NA	NA	NA	NA	NA	NA	NA	NA	NA	NA	NA	NA	NA	NA	NA	NA	NA	NA	NA	NA	NA	NA	NA	NA	NA	NA	NA	NA	NA	NA	NA	NA	NA	NA	NA	NA	NA	NA	NA	NA
SFPQ	1.91324e-43	3.01327e-42	0.892836	0.374432	-0.518404	0.93625	0.39605	-0.5402	Lung adenocarcinoma	2.79436e-07	3.67645e-06	0.451536	-0.0927453	-0.544281	0.497231	-0.0822403	-0.579471	Ovarian Cancer	0.0001146	0.000189538	0.2202	5.41103	5.19083	0.177925	5.39134	5.21341	2014 CPTAC CRC	2.30453e-47	1.64519e-45	0.487017	0.200072	-0.286945	0.486	0.185	-0.301	2019 CPTAC CRC	0.598474	0.707964	0.0092409	0.107592	0.0983513	0.0422185	0.11253	0.0703119	Clear Cell Renal Cell Carcinoma	5.07434e-28	1.09483e-26	0.389489	28.829
SKIV2L2	NA	NA	NA	NA	NA	NA	NA	NA	NA	NA	NA	NA	NA	NA	NA	NA	NA	NA	NA	NA	NA	NA	NA	NA	NA	NA	NA	NA	NA	NA	NA	NA	NA	NA	NA	NA	NA	NA	NA	NA	NA	NA	NA	NA	NA	NA	NA	NA	NA
SLC25A5	2.44185e-26	1.43126e-25	1.98664	0.539482	-1.44716	2.21185	0.62625	-1.5856	Lung adenocarcinoma	1.59783e-05	0.000116519	0.616331	0.291613	-0.324718	0.610691	0.273788	-0.336903	Ovarian Cancer	0.0166399	0.0222543	0.155944	6.6316	6.47566	0.151761	6.67718	6.52542	2014 CPTAC CRC	7.93987e-06	2.16535e-05	0.24832	0.0625742	-0.185746	0.2495	0.062	-0.1875	2019 CPTAC CRC	4.88162e-58	1.39765e-56	-1.28129	-0.70867	0.572621	-1.37922	-0.748689	0.630534	Clear Cell Renal Cell Carcinoma	2.07568e-05	4.65619e-05	-0.311521	29.6788
SMARCA4	NA	NA	NA	NA	NA	NA	NA	NA	NA	NA	NA	NA	NA	NA	NA	NA	NA	NA	NA	NA	NA	NA	NA	NA	NA	NA	NA	NA	NA	NA	NA	NA	NA	NA	NA	NA	NA	NA	NA	NA	NA	NA	NA	NA	NA	NA	NA	NA	NA
SMARCA5	1.03412e-32	8.54122e-32	0.976633	0.410138	-0.566495	0.9462	0.4234	-0.5228	Lung adenocarcinoma	1.15853e-10	6.34544e-09	0.443599	0.217831	-0.225768	0.439438	0.208867	-0.230571	Ovarian Cancer	2.50846e-07	5.24254e-07	1.02169	3.74611	2.72442	0.882304	3.84187	2.95956	2014 CPTAC CRC	1.48283e-46	9.06213e-45	0.552577	0.237812	-0.314765	0.5325	0.242	-0.2905	2019 CPTAC CRC	1.10798e-21	4.4176e-21	0.215906	0.197002	-0.0189042	0.223301	0.179768	-0.043533	Clear Cell Renal Cell Carcinoma	2.88582e-33	1.27956e-31	0.594072	26.0407
SND1	2.19085e-40	2.85004e-39	1.22249	0.495565	-0.726921	1.2771	0.5308	-0.7463	Lung adenocarcinoma	6.49977e-11	3.89909e-09	0.449278	0.226283	-0.222995	0.42299	0.201245	-0.221746	Ovarian Cancer	0.000903825	0.0013846	0.257036	5.73627	5.47924	0.283939	5.74739	5.46345	2014 CPTAC CRC	7.0601e-43	2.98187e-41	0.472115	0.210804	-0.261311	0.4855	0.214	-0.2715	2019 CPTAC CRC	1.08829e-49	1.49752e-48	0.277666	0.183863	-0.0938029	0.286454	0.18493	-0.101524	Clear Cell Renal Cell Carcinoma	0.000193143	0.00039254	0.16207	28.0957
SNRNP200	8.75419e-37	9.33901e-36	0.813186	0.353213	-0.459973	0.80795	0.36545	-0.4425	Lung adenocarcinoma	3.73436e-08	6.95655e-07	0.359059	0.235653	-0.123406	0.35358	0.218842	-0.134738	Ovarian Cancer	8.19872e-13	2.5318e-12	0.820196	5.266	4.4458	0.857742	5.31759	4.45985	2014 CPTAC CRC	1.73495e-56	4.24115e-54	0.432052	0.200016	-0.232036	0.412	0.189	-0.223	2019 CPTAC CRC	1.58792e-17	5.45774e-17	0.13044	0.164066	0.0336256	0.142269	0.165735	0.0234665	Clear Cell Renal Cell Carcinoma	3.8057e-20	3.49675e-19	0.301175	26.9949
SNRPD1	5.17389e-18	2.0225e-17	1.20501	0.149264	-1.05575	1.2037	0.1898	-1.0139	Lung adenocarcinoma	0.364709	0.552961	0.10821	-0.711199	-0.819409	0.064386	-0.673266	-0.737652	Ovarian Cancer	0.00118028	0.00178385	0.337678	3.12201	2.78433	0.46877	3.2324	2.76363	2014 CPTAC CRC	1.07694e-08	3.55906e-08	0.255173	0.113682	-0.141491	0.2676	0.164	-0.1036	2019 CPTAC CRC	9.50127e-07	2.24541e-06	0.0846077	0.121067	0.0364596	0.0898555	0.117124	0.0272688	Clear Cell Renal Cell Carcinoma	0.00555949	0.00970351	0.132462	26.2814
SNRPD2	2.91389e-58	1.21699e-56	1.28499	0.541761	-0.743226	1.23935	0.53035	-0.709	Lung adenocarcinoma	4.54332e-11	3.03229e-09	0.758844	0.0388782	-0.719966	0.808976	0.0533934	-0.755582	Ovarian Cancer	2.13517e-22	1.22132e-21	2.3998	3.49579	1.09599	2.50752	3.53626	1.02874	2014 CPTAC CRC	3.10219e-48	2.50254e-46	0.494934	0.201773	-0.293161	0.5005	0.206	-0.2945	2019 CPTAC CRC	1.12086e-06	2.64197e-06	0.0803127	0.150995	0.0706825	0.089916	0.137098	0.0471818	Clear Cell Renal Cell Carcinoma	2.71943e-20	2.5275e-19	0.323855	28.0651
SNW1	1.13266e-34	1.05646e-33	0.839006	0.384503	-0.454503	0.7899	0.3485	-0.4414	Lung adenocarcinoma	1.988e-05	0.000141192	0.326407	0.030803	-0.295604	0.376466	0.059603	-0.316863	Ovarian Cancer	0.0216008	0.0283806	0.263976	1.52759	1.26361	0.294751	1.59135	1.2966	2014 CPTAC CRC	5.98911e-32	8.80039e-31	0.35951	0.170753	-0.188757	0.363	0.165	-0.198	2019 CPTAC CRC	5.5316e-05	0.000119644	0.12665	0.190291	0.0636411	0.143148	0.221941	0.0787928	Clear Cell Renal Cell Carcinoma	5.71204e-13	2.57281e-12	0.223321	25.4394
SON	7.32215e-36	7.35494e-35	0.831015	0.366594	-0.464422	0.8305	0.3608	-0.4697	Lung adenocarcinoma	0.000893939	0.00382391	0.174784	-0.103109	-0.277893	0.221359	-0.115077	-0.336436	Ovarian Cancer	1.83541e-08	4.20719e-08	1.14293	2.60787	1.46494	1.11442	2.65382	1.53941	2014 CPTAC CRC	3.33909e-18	1.88367e-17	0.227434	0.114247	-0.113187	0.222	0.109	-0.113	2019 CPTAC CRC	0.627259	0.730469	-0.110275	-5.12876	-5.01849	0	-5.54174	-5.54174	Clear Cell Renal Cell Carcinoma	6.90785e-10	2.3703e-09	0.166986	26.2774
SRP14	3.67515e-50	8.6559e-49	1.4967	0.579469	-0.917228	1.52035	0.61075	-0.9096	Lung adenocarcinoma	1.66605e-09	5.50508e-08	0.760344	-0.0782773	-0.838622	0.746075	-0.0808629	-0.826938	Ovarian Cancer	0.0162581	0.0217516	-0.185088	3.28173	3.46681	-0.224363	3.27275	3.49711	2014 CPTAC CRC	7.40384e-28	7.96357e-27	0.419158	0.160353	-0.258805	0.412	0.146	-0.266	2019 CPTAC CRC	0.00181055	0.00357651	0.0580365	0.104531	0.0464944	0.0586029	0.104163	0.0455597	Clear Cell Renal Cell Carcinoma	4.35114e-05	9.49179e-05	0.152545	27.6101
SRPK1	2.56574e-50	6.11274e-49	2.56302	0.632655	-1.93037	2.55225	0.66515	-1.8871	Lung adenocarcinoma	0.13076	0.256824	0.175962	0.0956847	-0.0802771	0.256079	0.100627	-0.155452	Ovarian Cancer	3.54678e-14	1.19231e-13	1.28357	1.86998	0.58641	1.42323	2.09423	0.670994	2014 CPTAC CRC	9.07674e-30	1.12997e-28	0.587138	0.178392	-0.408746	0.5145	0.13	-0.3845	2019 CPTAC CRC	0.00526148	0.00996313	-0.0772608	0.0230662	0.100327	-0.0926528	-0.000570195	0.0920826	Clear Cell Renal Cell Carcinoma	0.851609	0.902396	0.00902768	24.5779
SRRM2	1.42982e-37	1.59805e-36	0.86969	0.341532	-0.528158	0.90065	0.36945	-0.5312	Lung adenocarcinoma	0.0140201	0.040719	0.121922	-0.0781124	-0.200034	0.121577	-0.0819231	-0.203501	Ovarian Cancer	0.0051847	0.00734351	0.578602	4.07298	3.49438	0.374807	4.21692	3.84211	2014 CPTAC CRC	5.517e-28	6.02241e-27	0.280025	0.115527	-0.164498	0.261	0.102	-0.159	2019 CPTAC CRC	2.43835e-24	1.05362e-23	0.173472	0.177237	0.00376516	0.197224	0.175233	-0.0219909	Clear Cell Renal Cell Carcinoma	1.20321e-17	8.48301e-17	0.229638	26.4719
SRSF1	NA	NA	NA	NA	NA	NA	NA	NA	NA	NA	NA	NA	NA	NA	NA	NA	NA	NA	NA	NA	NA	NA	NA	NA	NA	NA	NA	NA	NA	NA	NA	NA	NA	NA	NA	NA	NA	NA	NA	NA	NA	NA	NA	NA	NA	NA	NA	NA	NA
SRSF10	NA	NA	NA	NA	NA	NA	NA	NA	NA	NA	NA	NA	NA	NA	NA	NA	NA	NA	NA	NA	NA	NA	NA	NA	NA	NA	NA	NA	NA	NA	NA	NA	NA	NA	NA	NA	NA	NA	NA	NA	NA	NA	NA	NA	NA	NA	NA	NA	NA
SRSF7	1.15786e-43	1.84044e-42	1.07047	0.505485	-0.564988	0.9507	0.4857	-0.465	Lung adenocarcinoma	5.99967e-07	6.99823e-06	0.573346	-0.0981625	-0.671509	0.535988	-0.103949	-0.639937	Ovarian Cancer	0.416931	0.455658	-0.0543907	3.91518	3.96957	0.0288757	3.94576	3.91688	2014 CPTAC CRC	1.91642e-29	2.32478e-28	0.54068	0.210988	-0.329692	0.563	0.216	-0.347	2019 CPTAC CRC	3.01612e-05	6.6202e-05	0.0760259	0.162509	0.0864828	0.101134	0.152566	0.0514318	Clear Cell Renal Cell Carcinoma	2.85512e-25	4.56159e-24	0.364126	27.8053
SSRP1	1.50592e-36	1.57876e-35	1.56392	0.517606	-1.04631	1.46875	0.43265	-1.0361	Lung adenocarcinoma	7.92513e-15	3.63043e-12	0.703436	0.0194091	-0.684027	0.724258	0.00929429	-0.714964	Ovarian Cancer	1.7991e-07	3.79413e-07	0.936526	3.71822	2.7817	0.759856	3.75583	2.99598	2014 CPTAC CRC	7.55483e-28	8.10436e-27	0.58235	0.240811	-0.341539	0.5555	0.196	-0.3595	2019 CPTAC CRC	7.4325e-05	0.000159579	0.102839	0.154802	0.0519633	0.149212	0.155581	0.00636847	Clear Cell Renal Cell Carcinoma	1.17832e-21	1.26551e-20	0.50674	26.4539
STAU1	1.75499e-40	2.30044e-39	1.67932	0.571769	-1.10755	1.70965	0.54895	-1.1607	Lung adenocarcinoma	0.000346215	0.00166388	0.310338	-0.189556	-0.499894	0.310313	-0.20938	-0.519693	Ovarian Cancer	1.77649e-45	5.28401e-44	2.74587	2.75639	0.0105201	2.84753	2.85233	0.00479302	2014 CPTAC CRC	1.97225e-27	2.05823e-26	0.533151	0.208822	-0.324329	0.552	0.219	-0.333	2019 CPTAC CRC	0.04547	0.0777646	0.0352353	0.111449	0.0762139	0.0173541	0.0989765	0.0816224	Clear Cell Renal Cell Carcinoma	7.74669e-22	8.43237e-21	0.335908	26.6836
STRAP	7.10101e-27	4.24907e-26	0.866684	0.45682	-0.409864	0.86685	0.46135	-0.4055	Lung adenocarcinoma	3.15548e-07	4.08753e-06	0.36718	0.090095	-0.277085	0.33041	0.0500871	-0.280323	Ovarian Cancer	0.0172208	0.0229652	0.191315	4.18287	3.99156	0.129246	4.18079	4.05155	2014 CPTAC CRC	0.0773173	0.130621	0.0625988	0.0655608	0.002962	0.11805	0.0937	-0.02435	2019 CPTAC CRC	0.803919	0.85854	-0.00344805	0.0928203	0.0962684	-0.017883	0.0746215	0.0925045	Clear Cell Renal Cell Carcinoma	0.158938	0.22733	0.043005	26.8672
SUPT16H	1.78248e-31	1.37326e-30	1.41786	0.436115	-0.981744	1.37555	0.39825	-0.9773	Lung adenocarcinoma	2.73205e-20	9.17788e-17	0.745024	0.254945	-0.490078	0.745513	0.235412	-0.510101	Ovarian Cancer	5.40577e-10	1.38918e-09	0.787966	4.12699	3.33902	0.741955	4.19206	3.45011	2014 CPTAC CRC	6.56882e-29	7.64657e-28	0.549276	0.227685	-0.321591	0.546	0.217	-0.329	2019 CPTAC CRC	0.000242458	0.000506184	0.0899149	0.148947	0.0590321	0.134374	0.154775	0.0204012	Clear Cell Renal Cell Carcinoma	2.3518e-27	4.62042e-26	0.555305	27.3294
SYNCRIP	9.05041e-40	1.13169e-38	3.35923	0.620222	-2.73901	3.41745	0.80475	-2.6127	Lung adenocarcinoma	4.25329e-13	7.39046e-11	0.668099	-0.0337674	-0.701867	0.636213	-0.0493985	-0.685612	Ovarian Cancer	9.79076e-25	6.39755e-24	0.800798	5.56971	4.76891	0.80092	5.57231	4.77139	2014 CPTAC CRC	1.29553e-41	4.56376e-40	0.637945	0.254765	-0.38318	0.649	0.279	-0.37	2019 CPTAC CRC	0.00120957	0.00242162	0.0941539	0.15492	0.0607658	0.0972578	0.127876	0.0306183	Clear Cell Renal Cell Carcinoma	4.50964e-11	1.70674e-10	0.183913	28.7742
TAF15	9.6575e-41	1.29385e-39	1.3637	0.383344	-0.980354	1.2862	0.3831	-0.9031	Lung adenocarcinoma	1.07628e-10	5.97213e-09	1.01989	-0.262082	-1.28197	1.14777	-0.214095	-1.36186	Ovarian Cancer	2.87067e-05	5.02738e-05	-0.277285	3.05738	3.33466	-0.281837	3.07977	3.36161	2014 CPTAC CRC	2.33838e-11	9.1129e-11	0.5426	0.0956588	-0.446941	0.4454	0.0254	-0.42	2019 CPTAC CRC	0.00966881	0.0178922	-0.0776586	0.0963077	0.173966	-0.0219269	0.095111	0.117038	Clear Cell Renal Cell Carcinoma	0.0339778	0.054107	0.106894	27.8304
TARS	8.13571e-30	5.72497e-29	1.85833	0.55211	-1.30622	1.93305	0.59875	-1.3343	Lung adenocarcinoma	2.04667e-08	4.20946e-07	0.520538	0.256433	-0.264105	0.542101	0.201591	-0.34051	Ovarian Cancer	2.89415e-31	3.04829e-30	2.32738	4.13025	1.80287	2.23713	4.15068	1.91355	2014 CPTAC CRC	0.0823224	0.137779	0.0609223	0.0548753	-0.006047	0.1249	0.126	0.0011	2019 CPTAC CRC	2.20413e-19	8.07331e-19	0.214872	0.153521	-0.0613504	0.201022	0.142047	-0.0589747	Clear Cell Renal Cell Carcinoma	3.3238e-15	1.84537e-14	0.338806	27.425
TBL3	6.66449e-20	2.86701e-19	0.873483	0.293169	-0.580314	0.84085	0.20635	-0.6345	Lung adenocarcinoma	0.0732651	0.161603	0.129705	0.137205	0.00749986	0.103684	0.103842	0.000158261	Ovarian Cancer	5.44362e-20	2.66659e-19	1.6967	2.04275	0.346048	2.09008	2.10204	0.0119509	2014 CPTAC CRC	2.43223e-30	3.14436e-29	0.463869	0.190302	-0.273567	0.4735	0.17	-0.3035	2019 CPTAC CRC	6.70717e-37	4.51644e-36	0.278585	0.195716	-0.082869	0.301484	0.196398	-0.105086	Clear Cell Renal Cell Carcinoma	3.15082e-26	5.51736e-25	0.414549	24.5159
TCOF1	9.27098e-17	3.44274e-16	0.933764	0.244006	-0.689758	1.00257	0.283875	-0.7187	Lung adenocarcinoma	0.00526137	0.0176806	0.297488	-0.110592	-0.408081	0.409979	-0.088884	-0.498863	Ovarian Cancer	7.30364e-43	1.77483e-41	2.72686	2.79752	0.0706557	2.90501	2.90981	0.00479302	2014 CPTAC CRC	3.72513e-21	2.5402e-20	0.44056	0.172587	-0.267973	0.5245	0.22	-0.3045	2019 CPTAC CRC	2.28893e-35	1.45276e-34	0.458379	0.237628	-0.220751	0.46732	0.208321	-0.259	Clear Cell Renal Cell Carcinoma	1.94417e-24	2.84732e-23	0.449255	26.4866
TCP1	NA	NA	NA	NA	NA	NA	NA	NA	NA	NA	NA	NA	NA	NA	NA	NA	NA	NA	NA	NA	NA	NA	NA	NA	NA	NA	NA	NA	NA	NA	NA	NA	NA	NA	NA	NA	NA	NA	NA	NA	NA	NA	NA	NA	NA	NA	NA	NA	NA
THRAP3	9.41013e-49	2.05667e-47	1.14041	0.441611	-0.698804	1.0623	0.4605	-0.6018	Lung adenocarcinoma	1.6034e-08	3.47506e-07	0.496257	-0.0359227	-0.53218	0.519679	0.0064694	-0.51321	Ovarian Cancer	0.00123105	0.00185681	0.304491	3.62077	3.31628	0.30701	3.65745	3.35044	2014 CPTAC CRC	2.17064e-30	2.81521e-29	0.401526	0.160322	-0.241204	0.413	0.169	-0.244	2019 CPTAC CRC	0.269028	0.383297	-0.0189396	0.0950377	0.113977	0.0142132	0.0985833	0.0843701	Clear Cell Renal Cell Carcinoma	1.58363e-17	1.10682e-16	0.327324	27.5551
TOP1	4.0161e-45	7.09419e-44	2.54353	0.741225	-1.8023	2.5599	0.8132	-1.7467	Lung adenocarcinoma	1.83971e-15	1.4262e-12	0.73166	-0.0282347	-0.759895	0.714006	-0.0606417	-0.774648	Ovarian Cancer	2.12458e-08	4.84316e-08	0.543155	4.40992	3.86677	0.648265	4.47092	3.82266	2014 CPTAC CRC	1.12644e-41	4.00308e-40	0.907931	0.308531	-0.5994	0.9155	0.32	-0.5955	2019 CPTAC CRC	0.746431	0.818111	-0.00639314	0.104258	0.110651	-0.00174211	0.0920104	0.0937525	Clear Cell Renal Cell Carcinoma	9.32184e-48	3.75437e-45	0.703369	26.4565
TSR1	3.24113e-11	9.24399e-11	0.626965	0.176185	-0.450779	0.63415	0.19385	-0.4403	Lung adenocarcinoma	0.0110859	0.0332017	0.184603	0.0247908	-0.159813	0.219385	0.0375175	-0.181868	Ovarian Cancer	1.09157e-25	7.60012e-25	1.25369	1.38849	0.134791	1.44787	1.45504	0.00717372	2014 CPTAC CRC	6.32485e-16	3.16517e-15	0.374371	0.141718	-0.232653	0.3405	0.0855	-0.255	2019 CPTAC CRC	3.6598e-82	2.04077e-79	0.84513	0.343747	-0.501383	0.878158	0.349304	-0.528854	Clear Cell Renal Cell Carcinoma	4.56481e-28	9.87245e-27	0.434267	25.2708
U2AF1	NA	NA	NA	NA	NA	NA	NA	NA	NA	NA	NA	NA	NA	NA	NA	NA	NA	NA	NA	NA	NA	NA	NA	NA	NA	NA	NA	NA	NA	NA	NA	NA	NA	NA	NA	NA	NA	NA	NA	NA	NA	NA	NA	NA	NA	NA	NA	NA	NA
U2AF2	9.75796e-31	7.22636e-30	0.699386	0.331924	-0.367462	0.7545	0.3518	-0.4027	Lung adenocarcinoma	5.18308e-08	9.16404e-07	0.580794	0.0242068	-0.556587	0.603073	0.0454981	-0.557575	Ovarian Cancer	2.96423e-08	6.64317e-08	0.708299	3.98022	3.27192	0.722994	4.00134	3.27834	2014 CPTAC CRC	4.46639e-35	8.79837e-34	0.479573	0.210625	-0.268948	0.512	0.232	-0.28	2019 CPTAC CRC	5.15601e-13	1.53163e-12	0.114414	0.175105	0.0606913	0.139341	0.181147	0.0418065	Clear Cell Renal Cell Carcinoma	1.91938e-11	7.47493e-11	0.208596	27.3584
U2SURP	1.40388e-36	1.4763e-35	0.914854	0.33712	-0.577734	0.8365	0.32	-0.5165	Lung adenocarcinoma	9.48202e-10	3.48758e-08	0.373305	0.17286	-0.200446	0.338012	0.147602	-0.19041	Ovarian Cancer	0.00129495	0.00195082	0.365349	2.79052	2.42517	0.386618	2.82711	2.4405	2014 CPTAC CRC	1.23344e-33	2.08598e-32	0.470822	0.19318	-0.277642	0.476	0.173	-0.303	2019 CPTAC CRC	0.678915	0.770089	-0.00686303	0.101312	0.108175	0.00230466	0.105294	0.10299	Clear Cell Renal Cell Carcinoma	1.58054e-32	6.06251e-31	0.441005	25.6612
UHRF1	NA	NA	NA	NA	NA	NA	NA	NA	NA	NA	NA	NA	NA	NA	NA	NA	NA	NA	NA	NA	NA	NA	NA	NA	NA	NA	NA	NA	NA	NA	NA	NA	NA	NA	NA	NA	NA	NA	NA	NA	NA	NA	NA	NA	NA	NA	NA	NA	NA
UPF1	NA	NA	NA	NA	NA	NA	NA	NA	NA	NA	NA	NA	NA	NA	NA	NA	NA	NA	NA	NA	NA	NA	NA	NA	NA	NA	NA	NA	NA	NA	NA	NA	NA	NA	NA	NA	NA	NA	NA	NA	NA	NA	NA	NA	NA	NA	NA	NA	NA
USP10	2.37595e-28	1.53766e-27	1.04559	0.371084	-0.674507	1.1001	0.4074	-0.6927	Lung adenocarcinoma	6.33528e-06	5.19927e-05	0.246469	0.136408	-0.110061	0.177898	0.0918626	-0.0860357	Ovarian Cancer	0.567879	0.603496	-0.0486139	2.70594	2.75455	0.0836258	2.80873	2.7251	2014 CPTAC CRC	0.000608252	0.00143138	0.0893402	0.0863062	-0.003034	0.10235	0.0967	-0.00565	2019 CPTAC CRC	0.0380501	0.0658246	-0.0391082	0.0486805	0.0877887	-0.066577	0.0364295	0.103007	Clear Cell Renal Cell Carcinoma	1.21255e-11	4.77997e-11	0.232355	26.2273
UTP14A	9.53289e-32	7.42198e-31	1.43932	0.44959	-0.989735	1.40345	0.35465	-1.0488	Lung adenocarcinoma	0.0291148	0.0750241	0.16363	-0.0999176	-0.263547	0.199709	-0.117465	-0.317174	Ovarian Cancer	9.66372e-22	5.31505e-21	1.28839	1.38987	0.101477	1.4297	1.43449	0.00479302	2014 CPTAC CRC	5.61144e-19	3.34571e-18	0.437267	0.171435	-0.265832	0.458	0.174	-0.284	2019 CPTAC CRC	3.53212e-25	1.56611e-24	0.241888	0.190893	-0.0509955	0.238846	0.17749	-0.0613562	Clear Cell Renal Cell Carcinoma	4.20259e-16	2.54577e-15	0.296854	24.445
VARS	5.71977e-30	4.05812e-29	0.897845	0.380225	-0.517621	0.85285	0.34115	-0.5117	Lung adenocarcinoma	0.327645	0.513531	0.0601139	0.146475	0.0863608	0.0906744	0.120394	0.0297194	Ovarian Cancer	8.73272e-05	0.000146056	0.350162	5.30887	4.95871	0.426125	5.37016	4.94403	2014 CPTAC CRC	3.30294e-23	2.57687e-22	0.267117	0.143521	-0.123596	0.238	0.124	-0.114	2019 CPTAC CRC	2.82671e-18	9.98818e-18	-0.182184	0.0114176	0.193601	-0.206264	-0.00790146	0.198362	Clear Cell Renal Cell Carcinoma	2.89164e-05	6.40482e-05	0.121646	26.926
VDAC2	2.75018e-13	8.66814e-13	1.3068	0.331891	-0.974907	1.3126	0.2953	-1.0173	Lung adenocarcinoma	1.15578e-05	8.74471e-05	0.474242	0.190824	-0.283418	0.448245	0.196578	-0.251666	Ovarian Cancer	0.592923	0.626097	0.0246608	6.00361	5.97895	0.000266164	5.98876	5.98849	2014 CPTAC CRC	0.039838	0.0729068	0.0784176	0.0484206	-0.029997	0.0627	0.0101	-0.0526	2019 CPTAC CRC	4.78448e-05	0.000103752	-1.21013	-1.53394	-0.323805	-0.592721	-0.37275	0.219971	Clear Cell Renal Cell Carcinoma	0.0221271	0.0361867	-0.172323	28.8454
WDR3	NA	NA	NA	NA	NA	NA	NA	NA	NA	NA	NA	NA	NA	NA	NA	NA	NA	NA	NA	NA	NA	NA	NA	NA	NA	NA	NA	NA	NA	NA	NA	NA	NA	NA	NA	NA	NA	NA	NA	NA	NA	NA	NA	NA	NA	NA	NA	NA	NA
WDR36	7.00198e-27	4.19225e-26	1.0824	0.384999	-0.697401	1.04585	0.30155	-0.7443	Lung adenocarcinoma	0.00253719	0.00938343	0.277395	0.207536	-0.0698595	0.265139	0.126933	-0.138206	Ovarian Cancer	3.12571e-27	2.45696e-26	1.94784	2.37118	0.423344	2.35948	2.62565	0.266175	2014 CPTAC CRC	1.30314e-42	5.20418e-41	0.583051	0.207212	-0.375839	0.5675	0.18	-0.3875	2019 CPTAC CRC	1.52366e-52	2.63157e-51	0.37252	0.220261	-0.152259	0.37869	0.219039	-0.15965	Clear Cell Renal Cell Carcinoma	1.11144e-21	1.19634e-20	0.340268	24.5342
XPG	NA	NA	NA	NA	NA	NA	NA	NA	NA	NA	NA	NA	NA	NA	NA	NA	NA	NA	NA	NA	NA	NA	NA	NA	NA	NA	NA	NA	NA	NA	NA	NA	NA	NA	NA	NA	NA	NA	NA	NA	NA	NA	NA	NA	NA	NA	NA	NA	NA
XRN2	1.69214e-15	5.88738e-15	0.573525	0.260092	-0.313434	0.51015	0.19385	-0.3163	Lung adenocarcinoma	1.08674e-10	5.98479e-09	0.326862	0.222323	-0.104539	0.318719	0.218948	-0.0997706	Ovarian Cancer	2.42208e-08	5.48435e-08	0.603943	3.25125	2.64731	0.712086	3.35843	2.64635	2014 CPTAC CRC	1.64102e-43	7.56463e-42	0.65919	0.25098	-0.40821	0.6515	0.238	-0.4135	2019 CPTAC CRC	0.448216	0.577405	-0.010376	0.0981711	0.108547	0.0105032	0.107144	0.0966408	Clear Cell Renal Cell Carcinoma	8.85307e-26	1.48824e-24	0.36217	26.345
YBX1	1.14364e-58	4.97798e-57	2.74104	0.773278	-1.96776	2.92315	0.95635	-1.9668	Lung adenocarcinoma	1.07066e-09	3.83991e-08	0.629934	-0.209153	-0.839088	0.666209	-0.18954	-0.85575	Ovarian Cancer	3.08296e-06	5.86314e-06	-0.440326	3.71304	4.15336	-0.504837	3.76818	4.27302	2014 CPTAC CRC	1.30432e-38	3.50732e-37	0.575517	0.171451	-0.404066	0.5795	0.15	-0.4295	2019 CPTAC CRC	0.00587	0.0110706	0.0873815	0.0842722	-0.00310932	0.0890973	0.0689242	-0.0201731	Clear Cell Renal Cell Carcinoma	1.42988e-18	1.10393e-17	0.474256	27.5569
ZC3H11A	1.87236e-33	1.61634e-32	1.13599	0.471201	-0.664791	1.042	0.4182	-0.6238	Lung adenocarcinoma	0.58663	0.746071	-0.0579267	-0.16731	-0.109383	0.0932024	-0.188702	-0.281904	Ovarian Cancer	9.09202e-14	2.97571e-13	1.00407	1.40905	0.40498	1.12107	1.41322	0.292153	2014 CPTAC CRC	1.13781e-28	1.31125e-27	0.361106	0.152604	-0.208502	0.348	0.143	-0.205	2019 CPTAC CRC	7.51551e-05	0.000161302	0.0693528	0.136923	0.0675706	0.0915584	0.142624	0.051066	Clear Cell Renal Cell Carcinoma	2.13393e-10	7.61689e-10	0.255845	24.0369
ZC3H15	2.43642e-50	5.83158e-49	1.50648	0.614298	-0.892185	1.49355	0.57915	-0.9144	Lung adenocarcinoma	1.45306e-09	4.91447e-08	0.525227	0.0795175	-0.44571	0.492593	0.0821722	-0.410421	Ovarian Cancer	1.37067e-07	2.91541e-07	0.800048	2.37805	1.578	0.806041	2.47312	1.66708	2014 CPTAC CRC	3.72227e-32	5.59172e-31	0.504102	0.207178	-0.296924	0.509	0.215	-0.294	2019 CPTAC CRC	1.136e-23	4.80585e-23	-0.21597	0.0250588	0.241029	-0.253469	-0.00202948	0.25144	Clear Cell Renal Cell Carcinoma	3.98419e-09	1.27058e-08	0.216146	26.0034
ZC3HAV1	7.10324e-25	3.88325e-24	0.740498	0.372175	-0.368324	0.6727	0.3553	-0.3174	Lung adenocarcinoma	0.00957371	0.029273	-0.215906	0.0705176	0.286424	-0.129526	0.0733151	0.202841	Ovarian Cancer	1.798e-08	4.12908e-08	0.802177	3.1598	2.35763	0.844579	3.28366	2.43908	2014 CPTAC CRC	2.40315e-06	6.80697e-06	0.103898	0.0820825	-0.021816	0.09115	0.0684	-0.02275	2019 CPTAC CRC	0.107375	0.171233	0.032143	0.118338	0.086195	0.0280114	0.12174	0.0937287	Clear Cell Renal Cell Carcinoma	7.67497e-32	2.64008e-30	0.489668	26.4621
ZFR	3.43746e-36	3.52844e-35	0.863273	0.381845	-0.481429	0.87425	0.37075	-0.5035	Lung adenocarcinoma	0.0015903	0.00629994	0.251968	0.136231	-0.115738	0.286684	0.144538	-0.142146	Ovarian Cancer	0.00149066	0.0022267	0.415196	2.39706	1.98186	0.309467	2.3923	2.08284	2014 CPTAC CRC	3.29722e-09	1.12421e-08	0.198488	0.0972629	-0.101225	0.2189	0.0859	-0.133	2019 CPTAC CRC	0.801457	0.856536	0.00429817	0.112625	0.108327	0.0312473	0.114875	0.0836275	Clear Cell Renal Cell Carcinoma	2.86535e-22	3.30113e-21	0.351398	25.03
ZNF207	1.7579e-33	1.51881e-32	1.02386	0.343225	-0.680631	1.0314	0.3826	-0.6488	Lung adenocarcinoma	0.0406363	0.0994251	0.165074	-0.199779	-0.364853	0.121994	-0.196294	-0.318288	Ovarian Cancer	9.34136e-10	2.35625e-09	-0.536176	2.56357	3.09974	-0.533104	2.62288	3.15598	2014 CPTAC CRC	1.90584e-18	1.09896e-17	0.3403	0.16326	-0.17704	0.3195	0.132	-0.1875	2019 CPTAC CRC	0.00282079	0.00545523	0.0485897	0.134714	0.0861244	0.0660033	0.127539	0.0615352	Clear Cell Renal Cell Carcinoma	0.937896	0.960554	-0.00322261	26.0379
[truncated: 14 more columns]

## Sheet: Table S4d
Gene	mRNA	Methylation	CNA	p-mRNA	p-methylation	p-CNA
ABCF1	0.173357	-0.591029	0.110954	0.631975	0.0719627	0.745352
ACIN1	0.331898	-0.209429	0.215327	0.0785851	0.315025	0.253143
ALYREF	0.360233	0.159493	0.431017	0.0549094	0.436414	0.0174108
APOBEC3C	0.763248	-0.297607	0.0910188	3.599e-05	0.215921	0.68707
AQR	0.0724363	0.121449	-0.0793373	0.70884	0.554513	0.676867
CCT3	0.361208	0.0375313	0.0186002	0.054208	0.855563	0.922284
CCT4	0.160004	0.0721223	-0.204692	0.407044	0.726247	0.277902
CCT6A	0.339089	-0.122558	0.107925	0.071945	0.550877	0.570256
CORO1A	0.712822	0.0586349	0.160608	1.43184e-05	0.776011	0.396533
DDB1	0.392277	0.0385836	0.516502	0.0353129	0.851557	0.00347674
DDX1	0.0619634	-0.29523	0.23653	0.74949	0.143136	0.208238
DDX17	0.364971	-0.348856	0.244097	0.051568	0.0806911	0.193624
DDX18	0.253791	-0.196572	0.169129	0.184025	0.449542	0.371614
DDX21	0.283801	-0.107829	0.467152	0.13571	0.600061	0.00924936
DDX23	0.0164694	-0.255403	0.570751	0.932425	0.207935	0.000989157
DDX3X	0.369111	-0.279033	0.204648	0.0487809	0.167458	0.278008
DDX41	0.229386	-0.157353	0.275923	0.231311	0.442674	0.139971
DDX46	0.441772	0.0997278	0.473766	0.0164276	0.627878	0.00817827
DDX5	0.233736	0.0438478	0.237147	0.222339	0.831571	0.207017
DDX6	0.393531	-0.106584	0.299932	0.0346795	0.604299	0.107329
DHX15	0.278829	0.305028	0.334374	0.142997	0.129716	0.0709175
DHX30	0.279519	-0.147864	0.555155	0.141968	0.470997	0.001451
DHX36	0.269505	0.121223	0.633484	0.157419	0.555255	0.000171447
DHX9	-0.180674	0.0540714	-0.0256353	0.348291	0.793057	0.893034
DKC1	0.316142	0.0629894	0.190207	0.0947704	0.759839	0.314048
DNAJA3	0.556776	0.0447972	0.526389	0.00170698	0.827977	0.00280737
DNMT1	0.378955	-0.0644861	-0.195741	0.090244	0.805771	0.395135
EEF1A1	0.110772	0.347485	0.288853	0.582287	0.0961617	0.143944
EEF1G	0.513236	0.297412	0.366686	0.00440935	0.140065	0.0462483
EEF2	0.308446	0.00750888	0.36277	0.103537	0.970959	0.0488103
EIF2AK2	0.552073	-0.163543	0.180285	0.00190298	0.424701	0.340414
EIF2S1	0.366679	-0.276492	-0.0263743	0.0504034	0.171521	0.889969
EIF2S3	0.129647	-0.00808827	-0.0308636	0.502668	0.968719	0.871383
EIF3D	0.270491	-0.023392	0.313133	0.155846	0.909693	0.0920088
EIF3F	0.285067	0.131686	0.383285	0.133898	0.521362	0.036552
EIF4A1	0.263517	-0.289601	0.422024	0.167212	0.151282	0.0201785
EIF5A	0.471731	-0.101949	0.397938	0.00978208	0.620199	0.0294192
EIF5B	0.389127	0.0145022	0.0411987	0.036945	0.943944	0.828865
ELAVL1	0.336126	-0.0446586	0.0628653	0.0746262	0.828502	0.741383
EMG1	0.543284	-0.0180812	0.347907	0.00232186	0.931638	0.0595743
EZR	0.818115	0.259702	0.255675	5.94891e-08	0.200118	0.172669
FAM98A	0.456257	0.0823848	0.310417	0.0128568	0.689081	0.0950166
FBL	0.201028	0.291784	0.0504785	0.295713	0.148084	0.791085
FIP1L1	0.523534	0.144338	0.234863	0.00507119	0.511134	0.228963
FRG1	0.533409	0.0775529	0.650948	0.00288519	0.706498	9.81122e-05
FUS	0.454492	0.0773396	0.539735	0.0132537	0.707271	0.00208185
FXR1	0.824556	0.0690501	0.365491	2.22368e-07	0.754236	0.0608288
G3BP2	0.393466	0.0564961	0.417793	0.0347121	0.783988	0.0216008
GNL3	0.489409	0.130317	0.608845	0.00704958	0.525741	0.000356538
GTPBP4	0.202144	-0.257637	0.089971	0.292982	0.203847	0.636347
HEATR1	-0.16421	0.0628048	-0.407209	0.394658	0.760523	0.0255224
HNRNPA0	0.328384	0.215465	0.350322	0.0819964	0.290462	0.0577091
HNRNPA1	0.124795	0.341653	0.0918125	0.535124	0.102258	0.642175
HNRNPA2B1	0.431476	0.0990234	0.239658	0.0194356	0.630321	0.202108
HNRNPA3	0.348556	-0.000131252	0.226096	0.0638732	0.999492	0.2296
HNRNPAB	0.289935	-0.101295	0.165792	0.127097	0.622457	0.381262
HNRNPC	0.52061	0.190652	0.0689982	0.00378733	0.350859	0.717133
HNRNPH1	0.191569	-0.283727	0.00297947	0.319486	0.16013	0.987533
HNRNPK	0.6631	0.173182	-0.203941	0.0187507	0.610591	0.524924
HNRNPL	0.188363	0.262584	-0.0562883	0.327806	0.194991	0.767659
HNRNPM	0.0599887	0.031375	0.193294	0.84565	0.927036	0.526917
HNRNPU	0.0644734	0.177988	0.134527	0.770084	0.440177	0.530842
HSP90AB1	0.203538	0.03376	0.0923822	0.289595	0.869949	0.627295
IGF2BP1	0.858376	-0.147059	0.157432	2.61217e-09	0.473443	0.40606
IGF2BP3	0.663325	-0.0433585	0.429921	8.78278e-05	0.833425	0.0177304
ILF2	-0.0892036	0.155588	-0.183847	0.645398	0.44787	0.330798
ILF3	0.0445005	-0.214791	0.162375	0.874871	0.480997	0.563144
KPNB1	0.240325	-0.00292779	0.234901	0.209202	0.988675	0.211479
LBR	0.698006	0.122115	0.352326	2.55815e-05	0.552329	0.0561961
LYAR	0.595133	-0.0077835	0.365948	0.000660638	0.969898	0.0467227
MATR3	0.292027	-0.0977873	0.244216	0.13158	0.690435	0.201698
MCM3	0.095213	-0.65504	0.0724767	0.623213	0.000281776	0.703497
MCM5	0.257264	-0.250664	0.278756	0.177891	0.216788	0.135783
MKI67	0.309353	-0.127813	0.462346	0.102474	0.53379	0.0100998
MOV10	0.558461	0.312522	0.459627	0.00164115	0.137056	0.0106095
MYO1C	0.688251	-0.315605	0.10088	3.68033e-05	0.11628	0.595819
NCL	0.0901911	-0.00661008	0.041644	0.721912	0.981347	0.865583
NCOA5	0.378571	-0.0943987	0.0991332	0.0428601	0.646454	0.602235
NKRF	0.452355	0.0143631	0.30837	0.0137479	0.944481	0.0973319
NOC4L	-0.155554	0.251744	0.0934343	0.420383	0.214748	0.623361
NOL6	-0.0888092	0.23038	0.0535113	0.646865	0.257528	0.778833
NOP2	0.448647	-0.252001	0.443064	0.0146419	0.214264	0.0142031
NOP56	0.444879	-0.30965	0.366198	0.0155995	0.123713	0.0465615
NPM3	0.686247	-0.176528	0.475585	3.95914e-05	0.388328	0.00790273
PA2G4	0.487694	0.110821	0.48958	0.00728269	0.589919	0.00603397
PABPC1	0.00955704	-0.200789	0.218061	0.960757	0.325342	0.247022
PABPC4	0.525105	0.229668	0.182828	0.00344634	0.259042	0.333532
PARP1	0.465599	-0.0315029	-0.0882053	0.010917	0.878579	0.643008
PCBP1	0.476186	0.00523533	0.516783	0.00902122	0.97975	0.00345595
PCBP2	0.328596	0.152846	0.130408	0.197831	0.586561	0.617872
PDCD11	0.335632	-0.0771375	0.358098	0.0750808	0.708002	0.0520126
PFN1	0.212498	-0.248337	0.324655	0.268424	0.221226	0.080046
PGAM5	0.117782	0.0980375	0.34387	0.542858	0.633746	0.0627975
PLRG1	0.18753	0.222709	-0.0223064	0.329988	0.274151	0.90686
POP1	0.507031	0.222515	0.656959	0.00499845	0.274579	8.0304e-05
PPP2R1A	0.17615	-0.246131	-0.141702	0.360693	0.225491	0.455104
PRDX1	0.74722	0.150451	0.590286	3.20867e-06	0.538689	0.000595469
PRKDC	0.39886	-0.288613	0.405414	0.0320893	0.152745	0.0262422
PRPF19	0.247988	0.367633	0.628906	0.194601	0.064648	0.000197358
PRPF3	0.440036	0.0552124	0.257941	0.0169057	0.788786	0.168764
PRPF4	0.199724	0.458658	0.0146762	0.298922	0.0184389	0.938645
PRPF40A	0.37007	0.0866258	0.316587	0.0481528	0.673919	0.0882886
PRPF8	-0.0630587	0.0575547	0.302652	0.745206	0.784648	0.104026
PSIP1	0.702627	0.301956	0.0741723	2.14256e-05	0.13382	0.696882
PTBP1	0.62856	-0.211507	0.535382	0.0213935	0.509318	0.0484985
RALY	0.565417	-0.105611	0.675514	0.00139213	0.607626	4.2051e-05
RBBP4	0.366116	0.0660924	0.176035	0.050785	0.753607	0.352109
RBBP6	0.347479	0.333021	0.160943	0.0647543	0.0964307	0.395536
RBM14	0.329543	-0.00118569	0.143129	0.0808598	0.995413	0.450529
RBM15	-0.297063	0.189062	0.327677	0.117599	0.354968	0.0771158
RBM25	0.0860586	0.0475069	0.337342	0.65713	0.82159	0.0682963
RBM39	0.366134	-0.139842	0.30653	0.0507724	0.49565	0.0994491
RBM4	0.438431	-0.0216255	0.441487	0.0173583	0.916489	0.0145926
RBMX	0.190935	-0.00244208	0.159409	0.321122	0.990553	0.400113
RCC2	0.496451	-0.133426	0.0110899	0.00615766	0.543898	0.953619
RNASEH1	0.00137312	-0.0892998	0.0254721	0.994688	0.685334	0.901699
RNASEH2A	0.135265	-0.0820287	-0.144159	0.484173	0.690359	0.447241
RNASEH2B	0.508395	-0.0140831	0.614436	0.00486343	0.94673	0.000303574
RUVBL2	0.307757	0.225081	0.171054	0.104351	0.268939	0.366114
SAFB	0.232191	-0.0162365	0.141715	0.225499	0.937253	0.45506
SART1	0.218184	-0.0380013	0.268207	0.255522	0.853773	0.151852
SART3	0.27424	-0.218426	0.171308	0.414458	0.572339	0.614517
SERBP1	0.504474	0.0734237	0.434314	0.0196933	0.77217	0.0491483
SETX	0.576759	0.0553351	0.310738	0.00105616	0.788327	0.0946565
SLC25A5	0.563206	0.0168732	0.231896	0.00146743	0.934797	0.217551
SMARCA4	0.313545	0.573601	-0.630043	0.545095	0.311972	0.179985
SMARCA5	-0.00293427	0.000910906	0.129698	0.987947	0.996476	0.494547
SND1	0.290219	0.0458134	0.413269	0.126708	0.824134	0.0232116
SNRNP200	-0.308118	-0.222519	-0.156884	0.103924	0.274571	0.407715
SNRPD1	0.247596	-0.25664	0.0656467	0.195331	0.205665	0.730353
SNRPD2	0.232267	0.000279783	0.0479377	0.225342	0.998918	0.801386
SON	0.267387	0.24446	0.00581353	0.355393	0.44383	0.983595
SRP14	0.306347	-0.415574	0.271724	0.106031	0.0347406	0.14635
SRRM2	0.303105	-0.321947	0.122112	0.10997	0.108732	0.520335
SRSF1	0.138369	0.0309717	0.0342029	0.474104	0.880612	0.857601
SRSF7	0.14942	-0.211773	0.444439	0.439158	0.34409	0.0138705
SSRP1	0.458673	0.0777659	0.322161	0.0123296	0.705727	0.0825288
STAU1	0.168013	-0.652759	0.603378	0.690854	0.15993	0.113262
STRAP	0.394801	0.0540275	0.312495	0.0340476	0.793221	0.0927085
SYNCRIP	0.437497	0.0751125	0.464835	0.0176259	0.71535	0.00965147
TAF15	0.389828	0.344281	0.186177	0.0365767	0.0994767	0.324598
TBL3	-0.0353786	0.0020392	-0.202125	0.855429	0.992112	0.284103
TCOF1	0.58394	-0.214567	0.565817	0.00686528	0.392552	0.0075065
TCP1	0.464603	-0.154609	0.22395	0.0111114	0.450768	0.23417
THRAP3	-0.034314	-0.060831	-0.12756	0.859736	0.767844	0.501748
TOP1	0.368949	0.312177	0.559891	0.0488878	0.120518	0.00129418
TSR1	0.483018	0.0490424	0.406534	0.00795136	0.811949	0.025791
U2SURP	0.164457	-0.331889	0.0447884	0.393939	0.0976383	0.814201
UHRF1	0.302515	0.155749	-0.0270235	0.110697	0.447396	0.887277
UPF1	0.233161	-0.102129	0.152414	0.223512	0.619577	0.421371
USP10	0.459916	0.151652	0.683762	0.0120653	0.45958	3.10798e-05
VDAC2	0.489087	-0.126279	0.130066	0.00709278	0.538752	0.493312
WDR3	0.0631692	0.0475475	0.0948297	0.744774	0.817585	0.618161
XRN2	0.53365	-0.0854953	0.702108	0.00287019	0.677949	1.53064e-05
YBX1	0.525353	0.202268	0.295687	0.00342829	0.321716	0.112641
ZC3H11A	0.323727	-0.105933	0.0120564	0.0866908	0.606523	0.949582
ZC3H15	0.178815	0.155216	0.0817856	0.353355	0.448971	0.667454
ZC3HAV1	0.970564	-0.989004	0.571164	0.00603558	0.00138192	0.236419
ZFR	0.332943	0.275361	0.225162	0.0775924	0.173353	0.23158
ZNF207	0.308189	-0.387388	0.162019	0.103841	0.0678034	0.39234

## Sheet: Table S4e
Gene	mRNA	Methylation	CNA	p-mRNA	p-methylation	p-CNA	type	Gene	mRNA	Methylation	CNA	p-mRNA	p-methylation	p-CNA	type
DDX18	0.14489	0.00573127	-0.138056	0.489551	0.978309	0.510471	cancer	DDX18	0.253791	-0.196572	0.169129	0.184025	0.449542	0.371614	cell
DDX21	0.341887	-0.372164	0.336094	0.0943751	0.0669515	0.100461	cancer	DDX21	0.283801	-0.107829	0.467152	0.13571	0.600061	0.00924936	cell
DKC1	-0.0144628	0.0830697	0.112544	0.945296	0.693014	0.592223	cancer	DKC1	0.316142	0.0629894	0.190207	0.0947704	0.759839	0.314048	cell
EIF4A1	0.392824	0.377371	0.383756	0.0520809	0.0629288	0.0582535	cancer	EIF4A1	0.263517	-0.289601	0.422024	0.167212	0.151282	0.0201785	cell
EMG1	0.145169	0	0.209026	0.488708	0	0.315978	cancer	EMG1	0.543284	-0.0180812	0.347907	0.00232186	0.931638	0.0595743	cell
FBL	0.214538	-0.0163154	-0.00715562	0.303093	0.938301	0.97292	cancer	FBL	0.201028	0.291784	0.0504785	0.295713	0.148084	0.791085	cell
GNL3	0.227095	-0.350181	0.221812	0.274972	0.0861462	0.286592	cancer	GNL3	0.489409	0.130317	0.608845	0.00704958	0.525741	0.000356538	cell
GTPBP4	0.34252	0	0.398464	0.0937272	0	0.0485069	cancer	GTPBP4	0.202144	-0.257637	0.089971	0.292982	0.203847	0.636347	cell
HEATR1	0.407646	0	0.19911	0.0431031	0	0.33999	cancer	HEATR1	-0.16421	0.0628048	-0.407209	0.394658	0.760523	0.0255224	cell
HNRNPA1	0.327192	-0.0615167	0.154975	0.110376	0.7702	0.459487	cancer	HNRNPA1	0.0892758	0.354417	0.113985	0.645129	0.0756536	0.548672	cell
IGF2BP3	0.426514	0.0807056	-0.204491	0.0334904	0.701352	0.326827	cancer	IGF2BP3	0.663325	-0.0433585	0.429921	8.78278e-05	0.833425	0.0177304	cell
ILF3	0.0473452	-0.0268233	0.300169	0.822188	0.898725	0.144876	cancer	ILF3	0.182406	-0.000516376	0.312763	0.343611	0.998002	0.0924144	cell
LYAR	0.411263	0	0.180781	0.0411097	0	0.387156	cancer	LYAR	0.595133	-0.0077835	0.365948	0.000660638	0.969898	0.0467227	cell
MCM3	0.356813	-0.336297	-0.0556715	0.0799651	0.100243	0.79154	cancer	MCM3	0.095213	-0.65504	0.0724767	0.623213	0.000281776	0.703497	cell
MCM5	0.45056	-0.351987	0.088334	0.0238051	0.0844284	0.674573	cancer	MCM5	0.257264	-0.250664	0.278756	0.177891	0.216788	0.135783	cell
MKI67	0.458733	-0.0653891	0.119644	0.0210844	0.756151	0.568917	cancer	MKI67	0.309353	-0.127813	0.462346	0.102474	0.53379	0.0100998	cell
NOL6	-0.0631045	-0.400173	-0.286351	0.764431	0.0474634	0.165224	cancer	NOL6	-0.0888092	0.23038	0.0535113	0.646865	0.257528	0.778833	cell
NOP2	0.285599	-0.208988	0.180949	0.166385	0.316067	0.386707	cancer	NOP2	0.448647	-0.252001	0.443064	0.0146419	0.214264	0.0142031	cell
NOP56	0.269336	-0.161404	0.223367	0.192933	0.440837	0.28314	cancer	NOP56	0.444879	-0.30965	0.366198	0.0155995	0.123713	0.0465615	cell
PABPC1	-0.0963423	0.0626541	0.0188768	0.646868	0.766066	0.928637	cancer	PABPC1	0.00955704	-0.200789	0.218061	0.960757	0.325342	0.247022	cell
PDCD11	0.246245	-0.0546233	0.199724	0.235396	0.795383	0.338474	cancer	PDCD11	0.335632	-0.0771375	0.358098	0.0750808	0.708002	0.0520126	cell
PGAM5	0.309028	0.317309	0.280685	0.132812	0.122208	0.174121	cancer	PGAM5	0.117782	0.0980375	0.34387	0.542858	0.633746	0.0627975	cell
PRKDC	0.386113	0.0101086	0.422441	0.0565972	0.961751	0.0354054	cancer	PRKDC	0.39886	-0.288613	0.405414	0.0320893	0.152745	0.0262422	cell
RALY	0.534111	-0.399893	0.543043	0.0059568	0.0476329	0.00502974	cancer	RALY	0.565417	-0.105611	0.675514	0.00139213	0.607626	4.2051e-05	cell
RBMX	0.0169643	0.0733605	0.0631722	0.935852	0.727469	0.764185	cancer	RBMX	0.190935	-0.00244208	0.159409	0.321122	0.990553	0.400113	cell
RCC2	0.355974	-0.232439	0.0131876	0.0807282	0.263527	0.950113	cancer	RCC2	0.496451	-0.133426	0.0110899	0.00615766	0.543898	0.953619	cell
SMARCA5	0.31015	0.0600331	0.120229	0.131337	0.775602	0.567015	cancer	SMARCA5	-0.00293427	0.000910906	0.129698	0.987947	0.996476	0.494547	cell
SSRP1	0.393468	-0.00408355	-0.0362662	0.051663	0.984544	0.863356	cancer	SSRP1	0.458673	0.0777659	0.322161	0.0123296	0.705727	0.0825288	cell
STAU1	0.474606	-0.0771245	0.455717	0.0165218	0.714047	0.0220572	cancer	STAU1	0.450045	-0.585518	0.454594	0.0142994	0.00167524	0.01161	cell
SYNCRIP	0.470249	-0.227355	0.400046	0.0176849	0.274407	0.0475403	cancer	SYNCRIP	0.437497	0.0751125	0.464835	0.0176259	0.71535	0.00965147	cell
TOP1	0.580786	0.572155	0.502944	0.00233321	0.00280365	0.0103902	cancer	TOP1	0.368949	0.312177	0.559891	0.0488878	0.120518	0.00129418	cell
XRN2	0.380713	-0.349478	0.392014	0.0604465	0.0868224	0.0526107	cancer	XRN2	0.53365	-0.0854953	0.702108	0.00287019	0.677949	1.53064e-05	cell
ZC3H15	-0.0990287	-0.0735054	-0.0696696	0.637673	0.726951	0.740708	cancer	ZC3H15	0.178815	0.155216	0.0817856	0.353355	0.448971	0.667454	cell
