# Supplementary material for: The Association of R-Loop Binding Proteins Subtypes with CIN Implicates Therapeutic Strategies in Colorectal Cancer
Source: Cancers (Basel). 2022 Nov 15;14(22):5607. doi: 10.3390/cancers14225607 (PMC9688457; doi:10.3390/cancers14225607)
Supplement: Supplementary file 1 [file cancers-14-05607-s001.zip › Table S5.xlsx]

## Sheet: Description
Table S5: Lists of potential therapeutic targets in RLBPs. Related to Figure S6.
Sheet	Description
Table S5a	204 RLBPs CERES score in CRC cell lines.
Table S5b	A list of core fitness genes from three CRISPR screening projects.

## Sheet: Table S5a
	LS513	C2BBE1	COLO320	CL11	LS1034	SNU1033	SW837	SW1463	LS123	HT29	RCM1	SW948	SW403	HT55	RKO	LS180	SW48	KM12	HCT116	LS411N	HCT15	DLD1	GP5D	C10	C75	C80	C84	C99	SNU1544	ECC4	TT1TKB	COLO201	OUMS23	COLO678	T84	NCIH747	NCIH716	SNU61	SW620	SNU503	SNUC1	LOVO	CCK81	COLO205	SW626	DIFI	HCC56	MDST8	SNUC4
ABCF1	-1.22201	-1.06306	-0.997369	-1.12571	-1.25171	-1.48465	-0.98458	-1.46204	-0.946553	-1.17406	-1.01279	-1.10991	-0.885093	-1.38093	-1.129	-1.0105	-1.12386	-1.38929	-1.32896	-1.33528	-1.28669	-1.15983	-1.09744	-1.0727	-0.933676	-0.95407	-0.988176	-0.716017	-1.38056	-0.506361	-0.801853	-1.19611	-0.654131	-0.918839	-0.994329	-1.08627	-1.12944	-0.982782	-1.21213	-1.09328	-1.16584	-1.28542	-0.960761	-1.21911	-1.24708	-1.00345	-1.20525	-1.17763	-0.988668
ACIN1	-1.19828	-0.834554	-0.869799	-1.3173	-1.39692	-0.824059	-0.708161	-0.300946	-0.856226	-1.02152	-0.770586	-1.22018	-1.35785	-0.977118	-0.739496	-0.71389	-0.851668	-0.889104	-0.803943	-1.03112	-0.715141	-0.832581	-0.925369	-0.422955	-1.10275	-0.746392	-0.889651	-0.607478	-0.680009	-0.930966	-1.21648	-0.570288	-0.378695	-0.986342	-0.928806	-1.20236	-0.962188	-0.78602	-0.88212	-0.778658	-0.997004	-0.811736	-0.700443	-0.902202	-1.32525	-0.877071	-0.761113	-0.421277	-0.93139
ALYREF	-1.23417	-0.96019	-0.727584	-1.02448	-1.18822	-1.0795	-0.795226	-1.07237	-1.018	-0.928937	-1.26618	-1.75639	-0.918985	-0.961932	-0.834004	-1.00135	-0.869815	-1.1064	-0.721576	-1.35402	-0.910726	-0.919266	-0.954637	-1.62883	-1.71103	-1.38898	-1.07192	-0.897337	-0.83739	-0.991951	-1.19402	-0.84665	-1.31039	-0.941099	-1.34676	-0.932228	-1.17821	-1.03691	-0.97545	-0.678371	-1.30216	-0.864933	-1.69829	-0.815206	-0.900512	-1.06945	-0.993265	-0.632407	-1.31037
APOBEC3C	-0.0137397	0.00544504	-0.111415	0.0757321	-0.0489012	-0.0599876	-0.172526	-0.00388903	-0.262954	-0.0913629	-0.259674	-0.0826596	-0.014473	-0.209309	-0.0719831	-0.0515323	-0.0248166	0.0850966	-0.0731971	0.0274292	-0.260733	-0.0223733	-0.144018	-0.079134	-0.109268	0.0700111	-0.20741	-0.244014	0.00356389	-0.0211451	-0.157427	-0.0884505	-0.0269565	-0.107515	-0.193942	-0.206509	-0.115046	-0.102432	-0.0483714	-0.0210562	-0.0927454	0.00470513	-0.3461	0.131111	-0.0600295	-0.127881	-0.0553655	-0.222784	-0.01944
AQR	-1.18818	-1.44956	-1.48708	-1.07792	-0.795364	-1.35416	-1.17017	-1.48966	-1.54548	-1.11317	-1.07843	-1.12217	-1.34469	-1.20579	-1.31762	-1.2163	-1.35307	-1.3582	-1.54604	-1.1168	-1.12105	-1.19412	-1.51426	-1.34491	-1.37705	-1.3436	-1.30182	-1.4329	-0.740623	-1.02348	-1.30901	-1.42263	-1.25909	-1.24374	-1.18608	-1.49032	-1.47268	-1.02137	-1.32604	-1.41991	-1.09548	-1.3155	-1.12475	-0.961893	-0.961758	-0.715701	-1.21711	-1.40704	-1.17632
BUB3	-1.71141	-2.074	-2.40886	-1.83883	-2.1434	-1.78746	-1.92355	-1.8469	-2.34534	-1.66459	-2.31893	-2.04052	-1.54105	-1.60265	-1.89494	-1.74239	-1.98727	-1.5348	-1.70098	-1.38309	-2.25949	-1.75894	-1.74687	-1.92911	-2.44187	-2.04648	-1.71919	-1.46071	-1.44176	-1.94654	-1.48759	-1.82187	-2.15057	-2.05609	-2.00332	-1.74727	-1.40853	-2.05223	-1.84816	-1.9246	-1.81013	-1.7962	-1.29157	-1.87336	-2.18732	-2.10139	-2.48714	-1.8719	-2.04383
CCT3	-1.73047	-2.02247	-2.00069	-2.0283	-1.86546	-1.64379	-2.02853	-2.00328	-2.02576	-2.05501	-2.20878	-1.96789	-1.93797	-2.12904	-1.94396	-1.98952	-2.01416	-1.93049	-2.09298	-2.12791	-1.87843	-2.06567	-1.81222	-2.0316	-2.15871	-1.60091	-2.20692	-1.75396	-1.71819	-1.59646	-1.71897	-1.92033	-1.62509	-1.63634	-1.8641	-1.79877	-1.78834	-1.75365	-1.98755	-1.9197	-1.62182	-2.04548	-1.89578	-2.07898	-2.09042	-2.10518	-1.7952	-2.17612	-1.88018
CCT4	-1.45098	-1.56283	-1.57604	-1.36348	-1.40186	-1.41031	-1.52658	-1.39091	-1.77238	-1.62156	-1.45159	-1.84917	-1.72264	-1.72429	-1.82863	-1.60086	-1.76456	-1.65056	-1.5957	-1.64197	-1.72077	-1.45112	-1.79745	-1.72549	-1.50628	-1.85814	-1.6525	-1.26025	-1.72186	-1.44749	-1.81285	-1.68213	-1.5633	-1.62222	-1.59623	-1.54949	-1.42541	-1.65539	-1.68366	-1.51711	-1.86947	-1.7234	-1.84258	-1.69339	-1.63469	-1.63292	-1.84448	-1.61241	-1.82538
CCT6A	-1.02217	-1.03062	-1.12633	-1.21363	-0.921429	-0.968829	-1.10041	-1.01316	-0.735793	-0.948543	-1.04833	-0.88308	-0.877886	-1.00405	-1.00417	-0.829904	-0.894727	-1.04103	-0.953085	-0.979214	-1.0349	-1.09662	-0.981714	-1.1434	-1.0255	-0.925168	-1.1402	-0.871555	-1.05222	-0.585144	-0.900204	-1.01731	-1.20105	-1.30346	-0.924025	-0.861296	-1.20558	-0.870362	-0.865664	-1.06797	-0.953967	-1.06399	-0.952657	-0.928849	-1.08724	-0.638614	-1.08203	-0.322775	-1.09012
CCT8	-1.04981	-1.28911	-1.46018	-1.12051	-1.06999	-0.963518	-1.10353	-1.04595	-1.2675	-1.2777	-1.36475	-0.850038	-1.4015	-1.39843	-1.18637	-1.21371	-1.27657	-1.47621	-1.23553	-1.32447	-1.01627	-1.307	-1.27656	-1.37684	-1.54321	-1.24315	-1.2812	-1.46058	-1.45282	-1.52673	-1.29917	-0.935673	-1.29341	-1.30088	-1.22315	-1.34432	-1.29454	-1.22049	-1.14079	-1.44671	-0.940841	-1.23209	-1.33207	-1.35874	-1.17149	-1.18146	-1.0537	-1.30455	-0.932563
CDC5L	-1.66857	-1.67165	-1.4627	-1.51616	-1.57185	-1.65361	-1.6138	-1.46108	-1.62357	-1.81122	-1.3908	-1.23801	-0.641412	-1.50023	-1.65424	-1.53377	-1.52557	-1.6513	-1.58831	-1.84943	-1.40046	-1.89665	-1.4382	-1.83763	-1.40495	-1.46944	-1.54007	-1.59943	-1.73444	-1.48768	-1.72443	-1.62367	-1.71608	-1.48545	-1.57837	-1.64333	-1.72344	-1.50061	-1.64797	-1.81813	-1.5117	-1.30094	-1.70283	-1.90435	-1.8586	-1.28126	-1.71637	-1.51841	-1.78132
CLTC	-1.12614	-1.47477	-1.44582	-1.27787	-1.14279	-1.59331	-1.14461	-1.61209	-1.39054	-1.34813	-1.26882	-0.827467	-1.01645	-1.35199	-1.06111	-1.48031	-1.35106	-1.43401	-0.869578	-1.43134	-1.48357	-1.22806	-1.18293	-1.56795	-1.13483	-1.02115	-1.6247	-1.34259	-1.13485	-1.18814	-1.60114	-1.26767	-1.60794	-1.03787	-1.1265	-1.10873	-1.46765	-1.51689	-1.19311	-1.51225	-1.74329	-1.2823	-1.72129	-1.16546	-1.36283	-1.27482	-1.45218	-1.30054	-1.37293
CMAS	-0.148634	0.0994219	-0.172102	0.00154224	-0.0907112	-0.257167	-0.124466	-0.219051	0.134275	0.00281261	-0.106213	0.0182374	-0.252274	0.0652411	-0.367277	-0.0275748	0.0390029	-0.0561292	-0.0394959	0.0484861	0.0167965	0.0912299	0.0347632	0.0463005	0.225935	0.0944613	-0.570941	-0.0136247	-0.0366039	0.0493533	-0.130643	-0.366578	-0.209201	-0.0185067	-0.0834524	0.13416	0.0843428	0.0357531	0.130521	-0.246245	-0.166102	0.0185391	0.0855277	0.197864	0.0207944	-0.302467	7.11719e-05	0.0468154	-0.0474975
CORO1A	-0.0613528	0.044152	-0.0733586	0.0786649	0.051859	0.193006	0.0151427	0.185014	-0.420619	-0.0614643	0.105847	-0.0600879	-0.782954	-0.0156626	-0.180935	-0.056656	-0.0470785	-0.0946128	-0.293009	-0.157902	-0.388524	-0.159405	-0.190486	-0.158739	-0.454504	0.126732	0.0848653	-0.0302439	0.0603418	0.096949	-0.126821	0.00729377	-0.0547522	-0.165723	-0.0716361	0.0233191	0.137722	-0.00144096	-0.0902675	-0.0709018	-0.142464	0.0207871	-0.0170911	-0.0628962	0.0497841	-0.0983425	0.0231446	-0.0200098	0.195454
DARS	-1.10754	-1.17119	-1.47051	-1.07482	-1.14688	-1.11123	-1.12036	-1.17139	-1.0259	-1.36382	-1.1939	-1.31615	-1.55327	-1.46004	-1.26127	-1.18133	-1.15229	-1.3133	-1.1803	-1.39089	-1.3191	-1.34314	-1.10157	-1.08427	-0.918882	-1.20861	-1.00689	-1.2157	-1.14101	-0.914528	-1.05137	-1.30254	-0.763672	-1.34077	-1.10568	-1.19616	-0.999121	-1.15702	-1.32523	-1.49666	-1.0154	-1.15041	-1.32039	-1.18014	-1.21018	-1.30432	-1.07964	-1.02946	-1.04085
DDB1	-1.68773	-1.63222	-1.7597	-1.79758	-1.90928	-1.92286	-1.72129	-1.49684	-1.58153	-1.55757	-1.84779	-1.80733	-1.5507	-1.66685	-1.66263	-1.81348	-1.61903	-1.48008	-1.64735	-1.71979	-1.29772	-1.74498	-1.53593	-1.81647	-1.412	-1.48655	-1.55291	-1.40243	-1.70702	-1.63845	-1.34907	-1.53199	-1.57552	-2.14633	-1.6563	-1.52517	-1.72525	-1.79823	-1.72677	-1.72404	-1.52988	-1.6747	-1.8361	-1.59403	-1.72796	-1.72517	-1.64331	-1.66648	-1.90541
DDX1	-0.423347	-0.59255	-0.512615	-0.516042	-0.189346	-0.438474	-0.428748	-0.322838	-0.624776	-0.476836	-0.642472	-0.312649	-0.297166	-0.537115	-0.445431	-0.375622	-0.464937	-0.377134	-0.445787	-0.454405	-0.666526	-0.53485	-0.284996	-0.467276	-0.388168	-0.521297	-0.465988	-0.644857	-0.726806	-0.390788	-0.599465	-0.565376	-0.727846	-0.813315	-0.503194	-0.241774	-0.547964	-0.19249	-0.662426	-0.43265	-0.118317	-0.532412	-0.299538	-0.499163	-0.339425	-0.687746	-0.388924	-0.184685	-0.377804
DDX17	-0.262453	-0.418225	-0.195233	-0.143249	-0.0380699	-0.556172	-0.253179	-0.112955	-0.358584	-0.36438	0.0157944	-0.14737	-0.375028	-0.353313	-0.148641	-0.0284476	-0.148553	-0.283287	-0.365185	-0.0600487	-0.263553	-0.173224	-0.384128	-0.153819	-0.517295	-0.127695	-0.090566	-0.219912	-0.178555	-0.385466	-0.492608	0.0360491	-0.4718	-0.420081	-0.307889	-0.275717	-0.193474	-0.110986	-0.282207	-0.0748817	-0.00957145	-0.0998623	-0.265671	-0.110289	-0.201606	-0.0577008	-0.264627	-0.195285	-0.25463
DDX18	-1.34977	-1.27057	-1.57877	-1.36701	-1.45564	-1.29132	-1.07014	-1.20402	-0.996724	-1.0136	-0.988466	-1.46373	-1.33865	-1.07859	-1.15727	-1.31976	-1.02445	-1.06176	-1.25115	-1.03439	-1.19335	-1.35313	-1.08883	-1.0147	-1.00931	-0.903691	-0.994286	-1.31772	-1.39179	-0.481693	-0.956117	-0.961396	-1.50781	-1.25417	-1.17725	-1.09443	-1.15127	-1.13938	-1.1025	-1.33863	-1.30983	-1.17721	-1.20519	-1.18164	-1.16214	-1.24161	-0.991578	-1.24428	-0.923573
DDX21	-1.1475	-0.804167	-1.33769	-0.844512	-1.02916	-0.792027	-0.993142	-0.944521	-0.871403	-1.01191	-1.00463	-1.56372	-1.01322	-0.895605	-0.90453	-0.845687	-0.778678	-0.871226	-0.913884	-1.0754	-0.944264	-1.51614	-0.950593	-0.920613	-1.04497	-1.39218	-0.86776	-0.976596	-1.0503	-0.814782	-0.813612	-1.03016	-0.89276	-0.812679	-0.801331	-1.00796	-0.928149	-1.04489	-0.858573	-0.977054	-1.20511	-0.908678	-1.49428	-0.94777	-0.885161	-1.09393	-0.905812	-1.07184	-1.0833
DDX23	-0.968124	-0.995565	-0.994493	-1.21723	-0.960402	-0.817333	-1.01537	-1.30134	-1.26189	-0.935635	-1.31013	-1.0855	-1.04075	-0.897031	-1.12609	-1.20317	-1.03429	-1.14766	-0.838811	-0.798147	-0.772944	-0.816409	-1.10738	-1.14991	-0.882813	-0.985786	-0.912207	-0.929138	-1.29787	-0.944916	-1.12776	-0.755184	-1.18797	-1.03156	-0.743074	-1.02646	-1.12866	-0.655445	-0.964101	-0.966492	-0.980156	-0.850311	-1.27783	-0.930362	-1.02041	-0.972017	-0.916464	-0.778699	-0.936122
DDX3X	-1.09973	-1.35604	-1.12841	-1.09513	-0.742783	-1.26366	-1.39168	-1.31787	-1.25244	-1.28457	-0.744975	-0.756252	-1.49987	-1.19141	-1.17386	-1.4993	-1.27794	-1.47906	-1.45094	-1.34941	-0.754782	-0.842391	-1.12548	-0.429121	-1.0844	-0.93516	-1.21578	-1.02077	-1.16444	-1.09968	-1.29138	-1.38529	-1.02915	-1.20298	-1.14435	-1.68711	-1.50543	-0.872503	-1.06929	-1.26564	-1.4291	-0.894723	-1.25646	-0.844257	-1.32761	-0.782381	-1.2507	-1.35006	-0.934711
DDX41	-0.848082	-1.13581	-1.18478	-1.37788	-1.33546	-0.965438	-1.33247	-1.24586	-1.20537	-1.45603	-1.17532	-1.6247	-0.526518	-1.25189	-1.3403	-1.42527	-1.62533	-1.21781	-1.38977	-1.44336	-1.43113	-1.33996	-1.20242	-0.946924	-1.32068	-0.722864	-1.19442	-1.30563	-1.25442	-1.56452	-0.939534	-1.25441	-0.999657	-1.39163	-1.29486	-1.19031	-1.28541	-1.31059	-1.32041	-1.40374	-1.07345	-1.15103	-1.08442	-1.18602	-1.34588	-1.43994	-1.35212	-1.09854	-0.999361
DDX46	-0.925485	-0.866735	-0.544157	-0.624955	-0.88542	-0.692181	-0.854124	-0.692043	-0.886455	-0.905062	-0.775942	-0.90473	-0.502831	-0.701359	-0.803585	-1.11016	-0.827217	-0.860167	-0.832298	-0.757266	-0.584322	-1.01381	-0.589561	-1.00135	-0.48626	-0.520249	-0.60607	-0.943831	-0.531391	-1.24569	-0.800377	-0.7201	-0.857524	-0.878541	-0.759639	-0.752707	-1.20029	-0.988967	-0.880007	-1.07386	-0.63318	-0.623095	-0.752209	-0.638806	-0.742224	-0.975083	-0.705983	-0.859878	-0.88445
DDX5	-0.53152	-0.627721	-0.852293	-0.791565	-0.649105	-0.769223	-1.00039	-0.712186	-0.762168	-0.999096	-0.620643	-0.543454	-0.826648	-0.852395	-0.577699	-0.71952	-0.548322	-0.460064	-0.894993	-0.474098	-0.70438	-0.867107	-0.628526	-0.648916	-1.00194	-0.83111	-0.633209	-0.438519	-0.799483	-0.346301	-0.897856	-0.506416	-1.07506	-0.776547	-0.794599	-0.788825	-1.09614	-0.884178	-0.525683	-0.794224	-0.341702	-0.544519	-1.18886	-0.600605	-0.558105	-0.737484	-0.708481	-0.860291	-0.318375
DDX6	-0.437262	-0.787009	-0.761128	-0.457724	-0.372551	-0.499721	-0.573635	-0.582982	-0.698834	-0.584995	-0.346082	-0.419443	-0.719792	-0.833907	-0.619929	-0.941846	-0.613793	-0.821903	-0.474155	-0.505932	-0.786506	-0.744163	-0.897063	-0.785091	-0.812502	-0.612436	-0.516417	-0.961255	-0.481501	-0.20608	-0.570103	-0.744612	-0.71448	-0.682489	-0.692867	-1.04265	-0.653488	-0.623084	-0.733694	-0.380916	-0.842774	-0.855531	-0.678745	-1.04612	-0.987725	-0.487437	-0.249662	-0.926797	-0.75983
DHX15	-1.26758	-1.34221	-1.47513	-1.35072	-1.35322	-1.39158	-1.26943	-1.15323	-1.47694	-1.27914	-1.56555	-0.91226	-1.33021	-1.37344	-1.30411	-1.3303	-1.20889	-1.3171	-1.2607	-1.38354	-1.15552	-1.16029	-1.31624	-1.13172	-1.23948	-1.23742	-1.43112	-1.33415	-1.54345	-1.39367	-1.53216	-1.10483	-1.22166	-1.31368	-1.42631	-1.4563	-1.63208	-1.57322	-1.46539	-1.39452	-1.25664	-1.3312	-1.23865	-1.38584	-1.33807	-1.22182	-1.48281	-1.01636	-1.20519
DHX30	-0.63829	-0.312247	-0.0324579	-0.407265	-0.696935	-0.240565	-0.409522	-0.498927	-0.388513	-0.49249	-0.0914669	-0.697828	-0.59549	-0.313357	-0.320749	-0.414321	-0.246347	-0.303701	-0.139795	-0.599927	-0.282145	-0.472958	-0.584852	-0.454635	-0.39682	-0.301089	-0.407659	-0.511443	-0.404885	-0.315692	-0.513469	-0.181584	-0.259587	-0.417262	-0.213511	-0.514262	-0.535872	-0.475189	-0.322765	-0.237511	-0.589765	-0.297736	-0.124232	-0.44817	-0.439742	-0.0583986	-0.599618	-0.230592	-0.462295
DHX36	-0.835296	-0.85166	-0.494447	-1.1	-0.817384	-0.724843	-0.811212	-0.692251	-0.660673	-0.801926	-0.679711	-0.863926	-0.824121	-1.00228	-0.769632	-0.986023	-0.875678	-1.05245	-0.823384	-0.567635	-0.774478	-0.708828	-0.638288	-0.970415	-0.787257	-0.493349	-0.346392	-0.309101	-0.530864	-0.663318	-0.798889	-0.942365	-1.03854	-0.456203	-0.757199	-0.468232	-0.683165	-0.793565	-0.824295	-0.749555	-0.988514	-0.773111	-0.623356	-0.703703	-0.505083	-0.508854	-0.723861	-0.793972	-0.755844
DHX9	-0.774227	-1.14737	-0.902897	-1.10082	-0.357185	-0.928515	-0.954355	-0.694738	-0.677566	-0.913008	-0.676438	-1.02392	-0.308615	-0.999069	-1.165	-1.15802	-1.10285	-1.41164	-0.981034	-1.38487	-1.46136	-1.11567	-1.15421	-0.973021	-0.849454	-0.610013	-1.03008	-1.16559	-1.32922	-0.553191	-0.748522	-0.979091	-1.36642	-0.253083	-1.00099	-0.580077	-1.30556	-1.24855	-0.841986	-1.31722	-0.692196	-1.0993	-1.52837	-0.697243	-0.84135	-1.47683	-1.11449	-0.68867	-1.52019
DKC1	-1.30834	-1.65228	-1.52662	-1.46532	-1.24912	-1.59482	-1.00209	-1.26207	-1.42846	-1.17644	-1.03789	-1.78459	-1.60402	-1.5189	-1.32514	-1.55783	-1.41063	-1.11029	-1.73668	-1.6043	-1.68774	-1.24876	-1.47425	-1.52257	-1.37473	-1.35075	-1.53234	-1.44983	-1.20446	-1.18231	-1.22133	-1.25649	-1.42902	-1.14319	-1.4472	-1.38415	-1.0613	-1.33459	-1.50038	-1.78525	-1.50493	-1.41801	-1.69631	-1.52707	-1.32858	-1.31481	-1.13598	-1.59623	-1.21757
DNAJA3	-1.01826	-0.835264	-0.750246	-0.946446	-0.788331	-0.94069	-1.03577	-0.783563	-1.27254	-0.862923	-0.97284	-1.80189	-0.964644	-0.854798	-0.809154	-0.815574	-0.805419	-0.845866	-0.735166	-0.918033	-0.919566	-0.976703	-1.08185	-0.974263	-0.872225	-0.71739	-1.2921	-1.17017	-0.844806	-1.20073	-0.912777	-0.945037	-0.714245	-1.08045	-0.845076	-1.03869	-0.709283	-1.04088	-0.879522	-0.787491	-1.14216	-1.26626	-1.1558	-1.1667	-0.817134	-0.842885	-0.675341	-1.07366	-0.920831
DNMT1	-0.749853	-0.811948	-0.923543	-0.544637	-0.975292	-0.717436	-1.16466	-0.569319	-0.719757	-0.818617	-0.719371	-0.516388	-0.601708	-0.695891	-0.778254	-0.624272	-0.754703	-0.847541	-0.794874	-0.913534	-0.808975	-0.802178	-0.537115	-0.929761	-0.663086	-0.415289	-0.618273	-0.819312	-0.843214	-0.784001	-0.983838	-0.800586	-0.740397	-0.727025	-0.66015	-0.838311	-0.850298	-0.831956	-0.866216	-0.75786	-0.838286	-0.779899	-0.666746	-0.561842	-1.10984	-0.719125	-0.770968	-0.813164	-0.60263
EEF1A1	-1.30677	-1.24738	-0.876927	-1.51555	-1.4198	-1.32115	-1.03411	-1.52035	-1.32268	-1.4241	-1.50545	-1.2328	-0.989224	-1.33365	-1.25668	-1.24889	-1.21515	-1.33747	-1.08946	-1.35707	-1.52393	-1.30145	-1.34264	-1.23871	-1.2433	-1.41541	-1.80964	-1.73642	-1.68175	-1.43578	-1.42456	-1.19609	-1.57847	-1.55841	-1.33914	-1.3008	-1.43178	-1.27667	-1.18377	-1.28926	-1.54074	-1.52058	-0.911673	-1.55202	-1.31272	-1.37287	-1.58616	-1.31034	-1.67866
EEF1G	-0.770021	-0.91779	-0.832791	-0.742206	-0.806891	-0.824742	-1.0321	-0.820304	-1.14795	-0.764413	-0.816507	-0.738986	-1.06954	-1.07485	-1.01882	-0.830955	-1.0424	-1.10558	-0.971512	-0.788429	-1.18449	-0.754795	-1.00435	-0.921221	-0.828351	-1.06225	-0.966321	-0.486434	-1.18904	-0.935636	-0.561277	-0.914358	-0.413993	-0.982034	-0.873198	-0.676176	-1.37775	-0.841446	-0.875518	-1.09154	-0.69745	-1.05475	-0.631187	-1.11439	-0.829626	-0.65915	-1.09691	-0.614971	-0.869196
EEF2	-2.36096	-2.15288	-1.8318	-2.04417	-2.46183	-1.79534	-2.34818	-2.15473	-1.88412	-2.03926	-2.45934	-1.61333	-1.71537	-2.09106	-2.10733	-2.03633	-1.98548	-1.9558	-2.46058	-2.06459	-2.25174	-1.96829	-2.47025	-2.00238	-2.03288	-1.95934	-1.98689	-2.23082	-1.91988	-1.73888	-2.28339	-2.28043	-2.18868	-1.68304	-2.2024	-2.34157	-2.05708	-1.86991	-2.17007	-2.17479	-2.23095	-2.22194	-1.60647	-2.46962	-2.01242	-1.76433	-1.97683	-1.94805	-2.29298
EIF2AK2	0.0910455	0.113786	0.114643	0.0684547	0.317504	-0.017611	0.104012	0.103623	0.299685	0.171541	0.0386394	0.0627344	0.147351	0.0153519	0.0357398	0.0995483	0.107073	0.0522656	0.117749	0.054317	0.0943571	0.0162607	0.0764693	0.0634109	-0.110435	-0.0388899	0.0206377	0.0300524	0.255424	0.081162	-0.0569328	0.107714	0.201978	0.0611441	0.0355765	-0.146395	-0.192296	0.23753	-0.0576928	-0.0395133	-0.0350257	0.203361	-0.0424579	0.238591	0.118514	-0.00987032	0.0865621	-0.0244591	0.00488795
EIF2S1	-1.76418	-1.87502	-1.39512	-1.41204	-1.66075	-1.8883	-1.72906	-1.6619	-1.9479	-1.76531	-1.67231	-1.60217	-1.53845	-1.72816	-1.91508	-1.79176	-1.67172	-1.70704	-1.96157	-1.7186	-1.85592	-1.71526	-1.94639	-1.44695	-1.64878	-1.58775	-1.67401	-1.59384	-1.56038	-1.82547	-1.77207	-1.6501	-1.61164	-1.54046	-1.7578	-1.80067	-1.62494	-1.46308	-1.8724	-1.76931	-1.89796	-1.66492	-1.70147	-1.45284	-1.76925	-1.7976	-1.76371	-1.55436	-1.5225
EIF2S3	-1.81162	-1.70141	-1.69254	-1.68564	-2.01562	-1.85549	-1.78979	-1.19481	-1.8664	-1.79314	-1.63715	-1.62419	-1.84049	-1.72259	-1.79258	-1.79006	-1.86601	-1.87893	-1.7815	-1.63807	-1.80404	-1.78646	-1.8016	-1.65803	-1.68554	-1.36847	-1.58656	-1.48489	-2.08581	-1.61914	-1.76532	-1.75665	-1.6068	-1.74528	-1.63809	-1.93043	-1.84489	-1.54846	-1.56662	-1.75804	-2.14389	-1.83873	-1.21635	-1.78355	-1.73522	-1.31537	-1.65655	-1.7365	-1.94263
EIF3D	-1.44877	-1.54405	-1.41741	-1.78738	-1.52699	-1.4223	-1.49212	-1.40859	-1.45793	-1.53528	-1.3922	-1.53389	-2.00456	-1.54056	-1.3739	-1.47734	-1.67254	-1.5493	-1.44618	-1.26816	-0.996089	-1.43038	-1.39899	-1.45945	-1.43621	-1.42883	-1.49244	-1.43622	-1.15871	-1.15392	-1.29076	-1.48905	-1.52288	-1.59924	-1.68885	-1.29641	-1.28169	-1.36739	-1.38309	-1.61325	-1.72621	-1.43844	-1.48742	-1.15666	-1.20214	-1.31184	-1.46246	-1.63389	-1.60751
EIF3F	-1.40719	-1.31581	-0.984503	-1.18711	-1.55052	-0.915105	-1.2014	-1.1445	-1.17883	-1.16291	-0.892925	-1.02501	-1.09626	-1.28686	-1.2394	-1.19118	-1.21699	-1.1253	-1.00037	-1.61383	-1.11695	-1.02847	-1.31972	-1.25917	-1.13928	-1.28975	-1.14838	-1.26938	-1.13634	-1.44007	-1.48809	-1.11187	-0.872528	-1.44032	-0.788273	-1.00208	-1.39473	-1.00682	-1.18768	-1.36083	-1.48223	-1.43642	-1.34762	-1.40247	-1.18663	-1.20633	-0.954102	-1.333	-1.17267
EIF4A1	-1.6491	-1.55367	-1.30537	-1.11043	-1.77693	-0.83381	-1.48542	-1.05284	-1.19574	-1.38857	-1.50543	-1.23706	-1.35918	-1.58652	-1.5367	-1.36539	-1.62898	-1.17091	-1.56318	-1.77026	-0.814801	-0.974718	-1.26113	-1.19447	-1.67169	-1.27527	-1.46495	-1.39291	-1.27874	-1.1658	-0.995968	-1.47351	-1.13263	-0.971739	-1.27168	-1.78098	-1.70247	-1.08979	-1.41899	-1.42594	-1.92307	-1.4974	-1.33687	-1.61612	-1.23524	-1.34371	-1.32117	-1.36973	-1.22797
EIF5A	-1.09948	-1.43561	-0.585259	-1.23627	-1.04255	-1.17335	-0.938094	-0.959188	-1.06496	-1.07761	-1.2034	-1.27016	-1.31211	-1.36204	-1.04654	-1.04901	-0.883451	-1.14442	-1.07776	-1.17356	-1.01813	-1.04523	-0.83159	-1.15682	-1.17482	-1.16144	-0.892283	-0.975211	-1.06756	-0.321353	-0.899201	-0.83902	-1.1784	-0.852167	-1.11552	-1.01624	-0.964252	-0.953308	-0.932742	-1.23256	-1.31969	-1.17837	-1.12169	-1.39316	-0.842374	-0.646334	-0.840128	-0.62856	-1.2611
EIF5B	-0.309439	-0.308268	-0.183896	-0.434715	-0.349139	-0.484146	-0.378251	-0.42394	-0.256015	-0.339977	-0.403094	-0.343772	-0.617277	-0.317872	-0.467622	-0.286772	-0.305313	-0.566965	-0.397013	-0.314347	-0.404532	-0.30073	-0.418642	-0.328252	-0.199848	-0.0337431	-0.5274	-0.202284	-0.604819	-0.32025	-0.0479846	-0.523421	-0.0888442	-0.527659	-0.0260794	-0.470379	-0.357015	-0.182064	-0.377688	-0.292597	-0.414147	-0.275379	-0.223662	-0.378812	-0.364658	-0.311164	-0.456688	-0.614928	-0.0923891
ELAVL1	-0.418027	-0.281997	-0.860686	-0.253342	-0.246102	-0.316771	-0.397782	-0.359109	-0.377162	-0.546862	-0.570206	-0.122686	-0.204614	-0.44667	-0.178149	-0.0816896	-0.131728	-0.207161	-0.169918	-0.752727	-0.353025	-0.457274	-0.351809	-0.440911	-0.0745081	-0.548138	-0.223126	-0.271076	-0.428144	-0.662165	-0.250292	-0.834142	-0.601933	-0.599874	-0.256053	-0.0268591	-0.563914	-0.312804	-0.304214	-0.246703	-0.209336	-0.381568	-0.311953	-0.921405	-0.517244	-0.20028	-0.344272	-0.707021	-0.444636
ENO1	-0.343165	-1.06859	-0.59215	-0.55466	-0.545625	-0.712967	-0.438438	-0.69878	-0.406249	-0.251838	-0.500332	-0.67544	-0.56346	-0.428829	0.00213405	-0.290244	-0.343843	-0.301191	-0.454103	-0.603913	-0.80625	-0.754664	-0.37475	-0.264824	-0.228272	-1.03894	-0.343835	-0.524175	-0.498708	-0.0969624	-0.907809	-0.64581	-0.804838	-0.562237	-0.568922	-0.42943	-0.307097	-0.616246	-0.0525162	-0.793472	-0.796013	-0.681077	-0.248374	-0.521452	-0.307957	-0.263592	-0.651006	-0.543517	-0.273876
EZR	0.284511	-0.117554	0.0374791	0.101908	0.223573	-0.222467	0.0910723	0.0762869	-0.0761566	0.05201	-0.0474951	0.120655	0.0654977	0.110571	-0.177985	0.188007	-0.165009	-0.0548066	0.0673846	0.0382514	-0.175141	0.115209	0.0368459	-0.00724176	0.298854	0.530218	0.000897958	0.00857091	0.0620606	0.00635985	-0.376915	-0.134672	-0.156588	0.121781	-0.14498	-0.162058	0.068605	-0.141344	-0.0303173	0.0831897	-0.292247	-0.0692029	0.0848437	0.312171	-0.0854786	0.407578	-0.070749	0.114786	0.408098
FAM98A	0.0113741	0.0522186	-0.0765838	0.0924648	-0.00979255	-0.0171439	0.168988	-0.055223	-0.0556111	0.124825	-0.0419758	0.039614	-0.0769557	0.0398614	0.00188576	0.136305	-0.146441	0.180326	-0.145845	0.0159692	-0.0114729	-0.082855	0.0838175	0.0316415	0.162911	0.0958422	0.111593	0.230707	0.0186684	-0.0787512	-0.0103441	0.173628	0.108581	-0.00516629	-0.0963807	0.0606436	0.248075	-0.054862	-0.016485	-0.0613148	0.156274	0.071244	-0.0432726	-0.193288	-0.120577	0.036979	-0.140237	-0.1549	0.0477726
FBL	-1.18161	-1.35209	-1.29646	-1.31216	-1.16919	-1.43256	-1.17815	-1.26052	-1.35798	-1.15084	-1.24886	-1.1777	-1.42111	-1.25163	-1.33968	-1.30732	-1.35029	-1.22286	-1.55153	-1.35424	-0.996306	-1.26377	-1.33894	-1.2173	-0.942105	-0.901825	-1.16152	-1.11555	-0.961243	-1.03933	-1.26305	-1.34447	-1.02057	-1.30709	-1.22961	-1.25882	-1.50542	-1.49755	-1.30982	-1.14263	-1.36892	-1.29385	-1.48795	-1.36329	-1.2448	-1.19458	-1.02808	-1.35698	-1.36342
FIP1L1	-1.13986	-1.06214	-0.594577	-0.730468	-0.963932	-0.592552	-0.765598	-0.82539	-1.0895	-0.974979	-0.773762	-0.308352	-1.22925	-0.756328	-1.07737	-1.13395	-0.846006	-1.09041	-1.10694	-0.927169	-0.861289	-1.15197	-0.970588	-0.865191	-0.913415	-0.914953	-0.696808	-0.590889	-1.10861	-0.62913	-1.29406	-0.944541	-0.903809	-1.03972	-0.943558	-1.05641	-0.991733	-1.39626	-0.83615	-1.03196	-1.02172	-0.862284	-1.41492	-0.798044	-0.901442	-1.00203	-0.845704	-0.979244	-0.933045
FRG1	-0.297567	-0.105549	-0.048363	-0.124471	-0.0742059	0.118404	-0.165993	-0.172141	-0.302543	-0.196703	-0.0982694	-0.173487	-0.325241	-0.0823764	-0.21464	-0.180159	-0.302482	-0.190365	-0.144701	-0.267128	-0.138738	-0.476371	-0.248364	-0.163418	-0.0093471	-0.454115	-0.197441	-0.215963	-0.31126	-0.00703131	0.0868533	-0.19699	-0.0631081	0.00704028	-0.0988125	-0.240914	-0.0628043	0.00419152	-0.0996916	-0.336098	-0.22283	-0.237915	-0.0342671	-0.0792068	-0.250298	0.177743	-0.24947	-0.26425	-0.238615
FUS	0.0384565	-0.0165139	0.00733098	-0.0205622	-0.136552	0.219147	-0.0488162	-0.0551837	-0.183426	0.262263	-0.0260159	0.147413	-0.152133	-0.106615	-0.250509	-0.0799399	-0.00578645	-0.00988109	-0.12372	-0.29161	-0.0477605	0.291165	-0.076593	-0.00551324	0.207175	0.076402	0.143634	0.0723756	-0.0579168	-0.183978	-0.28884	0.250458	-0.142513	-0.00304242	-0.215646	0.105306	0.056324	0.229596	0.0558176	0.16975	0.0671185	-0.064057	0.0900022	0.0472438	-0.26227	-0.0601097	0.0325682	-0.294163	-0.204929
FXR1	0.131814	0.237856	0.171373	0.11596	-0.0308554	0.10884	0.199722	-0.321375	0.226148	0.28149	0.0803492	0.055285	-0.0034839	0.045386	0.161887	0.1562	0.0367522	0.0411382	0.100697	-0.111192	0.0715525	0.0679038	-0.0414974	0.0916983	0.235551	0.246987	0.136727	0.100088	0.00202712	0.0420818	0.0738381	0.00156015	0.0850741	0.104935	0.135126	0.181978	0.288289	0.170545	0.0685895	-0.0218002	-0.0400913	-0.0360889	-0.20345	0.1234	0.18805	0.0472486	-0.0960102	0.019849	0.0790913
G3BP2	-0.298143	-0.135222	-0.259239	0.0195741	-0.181618	-0.209798	-0.0364335	-0.270611	0.0553515	-0.0470624	-0.322543	0.0949745	-0.0796569	-0.0828108	-0.132691	-0.123362	-0.176372	-0.223117	-0.269628	-0.326564	-0.158813	-0.296698	-0.294516	-0.127903	-0.0684008	0.0440689	0.103227	0.0328649	-0.289197	0.079419	-0.180564	-0.137142	-0.173927	0.0223825	-0.219784	-0.368908	-0.0474041	-0.42771	-0.0860879	-0.0876763	-0.520374	-0.326769	-0.137435	-0.22552	0.0618318	0.217594	-0.315904	-0.0755981	-0.181997
GNL3	-1.29144	-1.15577	-0.765511	-1.18263	-0.906602	-1.06056	-1.02101	-1.21791	-0.97541	-1.11965	-0.960094	-0.644904	-0.954194	-1.16483	-1.14165	-0.9906	-1.09185	-1.01856	-1.37338	-1.24075	-1.11441	-1.00683	-1.2585	-1.28904	-1.06039	-0.81227	-1.0507	-1.16613	-1.10636	-0.609823	-0.982863	-1.30775	-1.37549	-1.15339	-1.08343	-1.14384	-0.978146	-1.15664	-1.16615	-1.2377	-1.29377	-1.28509	-1.59962	-1.2337	-1.15427	-1.0312	-1.20286	-1.28243	-1.28424
GTPBP4	-1.54306	-1.47388	-1.20731	-1.33039	-1.29799	-1.01444	-1.35721	-1.52464	-1.28771	-1.64059	-1.29039	-1.92197	-1.70329	-1.52033	-1.59317	-1.64988	-1.53436	-1.62185	-1.81945	-1.56756	-1.6226	-1.63176	-1.56073	-1.60064	-1.59015	-1.31417	-1.33187	-1.4551	-1.16874	-1.40604	-1.21579	-1.48161	-1.45647	-1.48058	-1.33868	-1.31954	-1.57573	-1.60775	-1.64677	-2.20851	-1.56106	-1.39866	-1.70404	-1.61092	-1.42061	-1.49711	-1.63984	-1.66813	-1.80765
HEATR1	-1.41179	-1.57224	-1.83645	-1.36295	-1.37373	-1.22157	-1.28303	-1.39511	-1.05418	-1.44521	-1.31843	-1.68551	-1.16048	-1.50408	-1.73328	-1.63285	-1.48004	-1.36476	-1.65243	-1.44855	-1.66173	-1.78858	-1.67198	-1.64239	-1.34445	-1.24043	-1.40793	-1.33475	-1.53901	-1.50661	-1.24928	-1.59477	-1.43126	-1.37352	-1.33979	-1.24057	-1.04121	-1.47999	-1.46333	-1.23412	-1.76114	-1.50768	-1.91115	-1.37482	-1.48302	-1.31337	-1.46979	-1.88832	-1.66821
HIST1H1B	-0.0721185	-0.00489273	0.0198989	0.0146762	0.0917681	0.0277351	0.223613	0.236207	-0.0257066	0.0506854	0.0396166	-0.124717	0.0841385	0.0379014	0.256707	-0.0704123	0.0431721	-0.0562253	-0.00692305	0.0343362	-0.0422777	0.02444	0.203733	0.114308	-0.0493383	0.119544	0.0716827	-0.0334879	-0.207409	-0.306033	-0.0337211	-0.166232	0.0674505	0.182022	-0.0280404	0.14384	-0.116768	-0.41713	0.0502287	0.0422644	-0.225264	-0.0340943	0.0341728	-0.0224113	-0.267467	0.035438	-0.252647	0.0110397	0.0186927
HIST1H2BC	-1.29869	-1.20502	-1.30868	-1.27135	-1.02025	-1.19257	-1.30815	-1.34364	-1.34337	-1.16452	-0.945895	-0.723661	-1.71464	-1.45048	-1.31996	-1.3454	-1.23535	-1.33789	-1.43856	-1.16636	-1.32213	-1.17828	-1.15149	-1.22233	-1.17656	-1.11014	-1.46779	-1.55261	-1.78284	-1.03373	-1.2489	-1.3148	-1.16727	-1.28064	-1.22175	-1.421	-1.41827	-1.35453	-1.22654	-1.45227	-1.13441	-1.35354	-1.29011	-0.972981	-1.30832	-1.3344	-1.28061	-1.1383	-1.43642
HNRNPA0	-0.213608	-0.228086	-0.227518	-0.239481	-0.154838	-0.253921	-0.201204	-0.278546	-0.317829	-0.423224	-0.341541	-0.950704	-0.103279	-0.266084	-0.407687	-0.445885	-0.269313	-0.331503	-0.461644	-0.154934	-0.459473	-0.420996	-0.154712	-0.376095	0.00729943	-0.0522794	-0.267708	-0.0995571	-0.317653	-0.617508	-0.35563	-0.0935857	-0.456942	-0.328376	-0.277358	-0.368789	-0.298623	-0.0988769	-0.383367	-0.261569	-0.212572	-0.375083	-0.435401	-0.4397	-0.344433	-0.272885	-0.546148	-0.186084	-0.0553209
HNRNPA1	-0.12381	-0.155329	-0.313536	-0.388234	-0.305694	-0.176933	-0.153691	-0.0841259	-0.245993	-0.39008	-0.134085	-0.164162	-0.319103	-0.311063	-0.428163	-0.444307	-0.427019	-0.309706	-0.580132	0.0450378	-0.513511	-0.31173	-0.386057	-0.0506168	-0.17396	-0.221799	-0.0637313	-0.280803	-0.414281	-0.203394	-0.500132	-0.32407	-0.379313	0.092592	-0.206792	-0.0298063	-0.185723	-0.540739	-0.284379	-0.267945	-0.169738	0.0779384	-0.133774	-0.453296	-0.246325	-0.0544666	-0.21832	-0.145797	0.184457
HNRNPA2B1	-0.207471	-0.0946276	0.0182057	-0.454794	-0.102472	-0.126526	-0.264246	-0.260551	-0.259331	-0.584642	-0.157415	-0.231671	-0.388002	-0.0625814	-0.452044	-0.346323	-0.239386	-0.200599	-0.317617	-0.0544113	-0.307611	-0.352074	-0.446819	-0.537411	-0.260941	-0.304741	-0.138709	-0.0203325	-0.398504	-0.339866	-0.520887	-0.336777	-0.269766	-0.259919	-0.122585	-0.214339	-0.15586	-0.636888	-0.222742	-0.886285	-0.105353	-0.356305	-0.256374	-0.0924766	-0.440837	0.0623622	-0.324018	-0.21146	-0.325747
HNRNPA3	-0.177984	-0.0925462	-0.312217	-0.16975	-0.0959352	-0.222797	-0.17216	-0.220624	-0.376985	0.00503279	-0.254677	-0.0482629	-0.114664	-0.147124	-0.188133	-0.195358	-0.250598	0.0385252	-0.0760194	-0.0913037	-0.29205	-0.268163	-0.0516535	-0.0469859	0.0125288	-0.166011	-0.486893	-0.0214047	-0.123384	-0.163954	-0.0543232	-0.118229	-0.229563	0.0163578	-0.205849	0.133842	-0.2222	0.0627174	-0.31966	-0.255371	-0.129637	-0.322595	-0.0275875	-0.167999	-0.00682913	-0.137695	-0.371428	-0.069957	-0.0358125
HNRNPAB	-0.00686241	-0.0763656	-0.0732051	0.00436463	0.136173	0.191967	-0.0773918	0.0525186	-0.0939752	-0.0844829	0.00433586	-0.159447	-0.0578941	0.0397164	0.0334999	0.0897333	0.142673	0.218994	0.212697	-0.114275	0.179756	-0.0415986	0.212628	-0.163432	-0.0572603	0.0947317	0.0827586	0.237612	0.00731802	-0.329125	0.0732999	0.139499	-0.162256	0.0177016	0.04478	-0.109295	0.0870879	-0.145588	0.138099	0.105438	-0.0516196	-0.117358	0.174536	0.242679	-0.0304041	0.238796	-0.000972403	-0.111463	0.145396
HNRNPC	-1.09849	-0.987644	-0.922724	-1.03623	-1.15659	-1.26736	-1.18658	-0.971024	-1.17462	-1.226	-1.10351	-1.52297	-1.10927	-1.04796	-1.1038	-1.14962	-1.13305	-1.1341	-1.1115	-1.30676	-1.20765	-1.37964	-1.28356	-0.731047	-1.06035	-0.452156	-1.19244	-0.890396	-1.12577	-1.24198	-1.02949	-0.92321	-1.53872	-0.997676	-1.02757	-1.28075	-0.805777	-0.819493	-1.04053	-1.04093	-0.870496	-1.088	-1.30887	-1.09961	-1.15092	-0.936207	-0.986949	-1.12204	-1.06814
HNRNPH1	-0.349184	-0.586208	-1.11174	-0.97433	-0.762058	-0.628315	-0.926607	-1.44409	-1.34908	-0.600522	-0.568375	-0.98319	-1.0231	-0.870731	-1.00453	-0.661674	-0.832448	-0.826778	-1.23651	-0.696788	-1.20324	-1.54118	-0.985031	-0.933164	-0.611915	-0.0150168	-0.575901	-0.620537	-0.611801	-0.921343	-0.248311	-0.989608	-0.794855	-1.11563	-0.654247	-0.845655	-1.23643	-0.719533	-0.676287	-1.25644	-1.0914	-1.01274	-0.569582	-0.748635	-0.616155	-0.544589	-0.772154	-1.02382	-0.52826
HNRNPK	-1.62899	-1.92045	-1.60501	-1.78841	-1.94833	-1.65003	-1.83557	-1.87505	-1.71911	-1.81387	-2.01866	-2.04283	-1.75678	-1.69416	-2.07331	-2.11407	-1.81562	-1.86087	-1.91514	-1.86335	-1.84971	-1.5958	-1.77151	-2.25243	-1.66742	-1.83702	-1.93535	-1.90862	-1.84459	-1.73567	-1.84144	-2.02847	-1.78481	-1.72214	-1.95697	-1.85124	-2.05281	-1.78923	-1.85394	-1.76056	-1.73548	-1.78786	-2.10928	-1.77618	-1.71016	-1.50515	-2.21945	-1.71282	-1.88275
HNRNPL	-1.18769	-1.07825	-1.24947	-1.37611	-1.16686	-1.1661	-1.09741	-0.805454	-1.01413	-0.983772	-1.20252	-1.1005	-1.42352	-0.824435	-1.24894	-1.16453	-1.04656	-1.02419	-1.33849	-1.31026	-0.965432	-1.07403	-1.36823	-0.810852	-1.21714	-1.11742	-1.19358	-1.02831	-1.65228	-1.26637	-1.06768	-1.16982	-1.01399	-0.702371	-1.03096	-1.3144	-1.37521	-1.12788	-1.26029	-0.931338	-1.15409	-1.35481	-1.41157	-1.11269	-1.40155	-0.913677	-1.0102	-1.3117	-1.41794
HNRNPM	-0.730505	-0.838318	-1.05975	-0.743229	-0.807283	-1.29092	-1.01007	-0.849927	-0.604523	-1.03647	-1.04134	-1.68692	-1.43587	-0.741054	-0.708777	-0.975119	-0.867549	-0.770151	-0.928666	-0.770464	-1.07705	-1.1559	-0.954912	-0.692873	-0.836975	-0.770306	-0.92076	-1.08256	-0.726529	-0.518462	-0.66642	-0.732491	-1.10234	-1.05213	-0.425182	-1.11191	-1.14861	-0.803482	-0.939789	-1.34442	-1.36481	-1.00543	-0.97773	-1.01787	-1.06946	-0.970746	-0.880663	-0.974036	-1.11343
HNRNPU	-1.1359	-1.10523	-0.728854	-0.821757	-1.32345	-1.18832	-0.957062	-1.29094	-1.05908	-1.15366	-0.849926	-0.760484	-1.02147	-1.1619	-1.03246	-0.917313	-0.92545	-1.04081	-1.24494	-0.957616	-0.903968	-1.13604	-0.935773	-1.10597	-0.853336	-1.02656	-1.2589	-0.910276	-1.39472	-0.726649	-1.26189	-0.840112	-0.93371	-0.943809	-1.13044	-0.79962	-0.515902	-1.10587	-0.940685	-1.16594	-0.722328	-1.05322	-0.810908	-0.80118	-1.13501	-0.960819	-0.741184	-1.27871	-1.08977
HNRNPUL1	-0.105777	-0.113988	-0.0175843	0.220592	0.219506	0.00316347	-0.149064	-0.225866	0.0450178	-0.000533419	-0.0187289	-0.0281926	-0.201224	-0.0858196	-0.0638329	-0.0500568	0.0609425	-0.0124636	-0.0297988	0.0182728	-0.00271982	0.142653	-0.00899388	0.0225749	0.023901	0.0596064	-0.316344	-0.0455701	-0.174992	-0.0334672	0.414182	0.164027	0.100971	0.0257226	0.132205	-0.0903823	0.126645	-0.0512132	-0.0224729	0.1114	-0.104685	0.0378422	-0.0547686	-0.0623619	0.0688915	-0.202401	0.243652	0.145648	0.00297784
HNRNPUL2	-0.211814	-0.134499	-0.331176	-0.269559	-0.442806	-0.440613	-0.359976	-0.452575	-0.27086	-0.390559	-0.0733043	-0.00117026	-0.101954	-0.327243	-0.391956	-0.303132	-0.350033	-0.432761	-0.479827	-0.711183	-0.427906	-0.419285	-0.278839	-0.175076	-0.247025	-0.545825	-0.50142	-0.421008	-0.342088	-0.332334	-0.454455	-0.360329	-0.201519	-0.328368	-0.42957	-0.302691	-0.286915	-0.289004	-0.220067	-0.359185	-0.151857	-0.355672	-0.281351	-0.501348	-0.319146	-0.366208	-0.244874	-0.335504	-0.496849
HSP90AB1	-0.0376345	-0.268652	-0.373145	-0.120649	-0.302486	0.0182899	-0.271002	-0.404455	-0.172047	-0.33937	-0.268391	-0.45503	-0.560181	-0.38995	-0.347757	-0.194913	-0.293004	-0.138797	-0.221857	-0.186782	-0.384207	-0.451612	-0.590189	-0.298789	-0.0832703	-0.189352	-0.181889	-0.178609	-0.3703	-0.211066	-0.572467	0.00768416	-0.312289	-0.060387	-0.251679	-0.241527	-0.53669	-0.415709	-0.316848	-0.324959	-0.389733	-0.487134	-0.394323	-0.227428	-0.643059	-0.179747	-0.241493	-0.24571	-0.202568
IGF2BP1	0.000282133	-0.442719	0.132922	-0.0698711	0.124033	-0.0186657	-0.0393523	0.0390132	-0.0415108	-0.187989	0.0426972	-0.0494273	-0.000853493	-0.137941	0.0681496	-0.0685344	-0.0794455	0.0992787	-0.0694712	-0.126169	0.0667811	0.0795867	0.05478	-0.134177	0.0103544	-0.00916416	-0.184519	0.0159532	0.101764	0.0725392	-0.109032	-0.0135755	0.0106952	-0.375496	-0.0712581	-0.158263	-0.0924215	-0.261856	0.0411039	0.112085	-0.126779	0.0702332	-0.0313617	0.0861556	0.142542	-0.156868	0.0308999	0.136942	-0.0940684
IGF2BP3	-0.15761	-0.233887	-0.105871	-0.629404	-0.0633717	-0.014953	-0.32238	-0.323831	-0.175812	-0.218555	-0.285323	-0.248337	-0.0402618	-0.239847	-0.161578	-0.167953	-0.160928	-0.0854153	0.0134183	-0.0496598	-0.143092	-0.119617	-0.0119942	0.056498	-0.226057	-0.0758643	0.105204	-0.0809075	-0.114974	-0.27709	-0.251296	-0.108095	-0.12583	-0.0450682	-0.143231	-0.24785	-0.353507	-0.105458	-0.231397	-0.0631464	-0.256376	-0.183252	-0.196491	-0.309698	-0.143633	-0.0119939	-0.154434	-0.070322	0.0181416
ILF2	-0.896102	-1.07047	-1.21277	-1.34731	-1.41047	-0.729133	-1.10421	-0.923536	-0.79713	-1.04315	-1.32743	-0.801613	-1.01444	-0.894367	-0.996	-1.07925	-0.892573	-0.861262	-1.00088	-1.29173	-0.869506	-0.869968	-1.03607	-1.12662	-0.961296	-1.1361	-1.02776	-0.801743	-0.929453	-1.06938	-0.770933	-1.14774	-1.17002	-1.11814	-1.10157	-1.03794	-0.483791	-1.00671	-0.978504	-0.760544	-0.863687	-1.04895	-1.53921	-1.09035	-1.3419	-0.953169	-0.9343	-1.27953	-0.996058
ILF3	-1.31229	-0.934395	-1.04346	-0.809429	-1.11088	-0.878051	-1.08702	-0.966246	-1.16622	-1.06706	-1.51088	-0.630386	-1.21511	-0.631358	-0.901123	-1.05673	-0.926182	-1.12897	-1.43662	-1.0584	-1.22606	-1.213	-0.991783	-0.905399	-1.24788	-0.869733	-1.26299	-1.07833	-0.524803	-1.53813	-1.42632	-1.3372	-0.943409	-1.13033	-1.02302	-1.20168	-0.949966	-0.955176	-1.22153	-0.682133	-1.1488	-1.20763	-1.1607	-1.09548	-0.958436	-1.16458	-0.981343	-1.26631	-0.979094
KPNB1	-1.81573	-1.43731	-1.63072	-1.70502	-1.64862	-1.69637	-1.84815	-1.85599	-1.60778	-1.90039	-1.86408	-1.64237	-1.72846	-1.70696	-1.76601	-1.6584	-1.8549	-1.93594	-1.60363	-1.78455	-1.78577	-1.73292	-1.72509	-1.65257	-1.44627	-1.8261	-2.04758	-1.45739	-1.46699	-1.82503	-1.52899	-1.6789	-1.76491	-1.5168	-1.87855	-1.86473	-1.94574	-1.63098	-1.7366	-1.68135	-1.53356	-1.70457	-1.67124	-1.97356	-1.85275	-1.92845	-1.69164	-2.02691	-1.7389
LARP1	-0.50684	-0.217518	-0.113531	-0.170839	-0.334396	0.0254321	-0.00245217	0.267661	-0.337324	-0.19177	0.040159	-0.0957173	0.000157285	-0.498794	-0.419115	-0.366619	-0.290219	-0.221727	-0.144743	-0.291546	-0.2668	-0.199882	-0.190114	-0.620707	-0.273276	0.0848947	0.0560318	-1.08595	-0.404548	-0.00587278	-0.307447	-0.738616	0.04762	-0.283094	-0.389777	-0.403695	-0.408477	-0.347907	-0.408112	-0.431025	-0.526284	-0.741571	-0.240071	-0.624883	-0.404711	0.037604	-0.000727126	-0.16841	-0.36952
LARS	-0.943308	-1.22683	-1.19242	-1.07304	-1.24115	-1.10564	-1.02734	-1.25213	-0.920707	-1.10204	-1.34457	-1.65617	-1.62429	-1.34237	-1.11817	-1.14529	-1.28096	-1.08362	-1.29353	-1.1513	-1.36294	-1.4372	-1.36342	-1.54629	-1.31008	-1.32506	-1.13454	-1.07642	-1.0126	-1.39465	-1.30328	-1.16537	-1.30383	-1.28313	-1.13844	-1.32924	-1.37945	-1.0108	-1.31889	-1.30834	-1.16232	-1.14549	-1.40616	-1.32117	-1.17352	-1.33698	-1.27166	-1.25922	-1.1138
LBR	0.0761523	0.165735	0.00928086	0.0137187	0.0875536	0.100866	0.137012	0.174015	0.266597	0.138326	0.108944	0.095848	0.0476264	0.0497646	0.235539	0.063159	0.125536	0.216759	0.0536981	0.0452771	0.0460977	0.131556	0.155178	0.108174	0.00628569	0.173266	0.208614	0.142564	0.0700244	0.0547465	0.114977	0.137185	0.103909	0.131783	0.0672644	0.119389	0.162626	-0.130067	0.128151	0.0579622	0.206171	0.19652	0.17067	0.114339	0.201058	0.161173	0.107322	-0.0205852	0.19041
LYAR	0.300685	0.250574	0.100336	0.322397	0.221098	0.165165	0.184287	0.176119	0.235957	0.405843	0.203663	0.064694	0.424117	0.21237	0.340945	0.332062	0.262909	0.2476	0.220761	0.197304	0.237529	0.310196	0.310937	0.223158	0.0369101	0.150826	0.211993	0.396488	0.0877939	0.21394	0.273909	0.315985	0.232855	0.251921	0.262223	0.287443	0.188374	0.265077	0.236271	0.299367	0.0114638	0.283446	0.373062	0.243386	0.254454	0.320562	0.185115	0.146705	0.219325
MAP4	-0.188361	-0.0408832	-0.0487253	-0.0904829	-0.0945268	-0.217708	-0.00939365	-0.14494	-0.040948	-0.0985166	-0.0202793	0.0019811	0.0782322	-0.286907	-0.0844484	-0.129107	-0.240892	-0.122623	-0.0121054	-0.34483	-0.100889	0.109497	-0.0474724	-0.202421	-0.136608	-0.153356	-0.119735	-0.16847	-0.148894	0.0284349	-0.200139	0.011972	-0.231292	-0.0686127	-0.197541	0.104928	0.0930811	-0.101245	-0.159901	-0.0941746	-0.120239	-0.011586	-0.0783302	-0.0955597	-0.106923	-0.268216	-0.154913	-0.282819	0.0317895
MATR3	-0.195096	-0.313964	-0.276674	-0.32742	-0.18801	-0.289755	-0.407334	-0.643918	-0.457444	-0.63368	-0.346901	-0.31882	-0.295082	-0.195151	-0.557992	-0.30862	-0.186109	-0.536195	-0.295832	-0.503297	-0.359085	-0.539285	-0.333776	-0.326897	-0.340147	-0.27027	-0.526629	-0.16857	-0.2502	-0.314171	-0.31621	-0.0658688	-0.230375	-0.2374	-0.346016	-0.471769	-0.167375	0.0246506	-0.420062	-0.177415	-0.468943	-0.397012	-0.29031	-0.394306	-0.587527	-0.143684	-0.330073	-0.617265	-0.362111
MCM3	-0.943568	-0.900514	-1.43358	-1.20096	-1.13906	-1.183	-1.00359	-1.18089	-0.990972	-1.15908	-0.853217	-1.545	-1.15526	-1.21515	-1.09634	-1.09926	-1.08635	-1.07456	-1.20773	-1.24615	-1.28354	-0.836302	-1.10778	-1.05601	-1.67817	-1.31044	-1.07553	-1.3325	-1.18916	-0.618674	-0.817416	-0.643422	-1.33572	-0.964888	-1.08687	-1.0593	-1.05212	-1.07363	-1.1662	-1.34953	-1.39589	-0.953359	-0.536386	-0.932986	-0.994648	-0.895271	-0.906224	-0.888359	-0.601322
MCM5	-1.63372	-1.34174	-1.42808	-1.26719	-1.53445	-1.81705	-1.60743	-1.76013	-1.54773	-1.62985	-1.43321	-1.32369	-1.45787	-1.58332	-1.46049	-1.33097	-1.51968	-1.32373	-1.54599	-1.67902	-1.6603	-1.31892	-1.56199	-1.08668	-1.7873	-1.62984	-1.55807	-1.40181	-0.67163	-1.69014	-1.65282	-1.23146	-1.3972	-1.395	-1.5226	-1.51292	-1.48879	-1.38288	-1.49816	-1.3164	-1.38092	-1.6018	-1.09846	-1.62844	-1.2442	-1.5915	-1.45238	-1.33475	-1.18629
MKI67	-0.414463	-0.185924	-0.193514	-0.256816	-0.0982323	-0.0344661	-0.256662	-0.127481	0.0382039	-0.153188	-0.226616	-0.141105	-0.0219738	-0.173652	-0.184256	-0.229095	-0.251473	-0.344851	-0.318721	-0.529776	-0.269777	-0.0880635	-0.366032	-0.0210722	-0.131527	0.00361592	-0.076311	-0.207194	-0.00858673	0.0033736	-0.257609	-0.245694	-0.214929	-0.0280032	-0.193401	-0.133695	-0.0570971	-0.263246	-0.286521	-0.0227371	-0.204695	-0.215576	-0.483275	-0.133176	-0.127138	-0.387702	-0.466823	-0.142423	-0.311662
MOV10	-0.314821	-0.00460617	-0.0811142	-0.127877	-0.266697	-0.134115	-0.269485	0.00276609	-0.125197	-0.249465	-0.138079	-0.21027	-0.194668	0.00544876	-0.236848	-0.336807	-0.273261	-0.14037	-0.299052	-0.0344866	-0.258428	-0.106901	-0.151162	-0.283405	-0.148721	-0.249919	-0.192014	-0.036366	-0.227435	0.0418212	-0.219336	-0.0113818	-0.236578	-0.0629645	-0.180425	-0.112439	-0.563035	-0.117214	-0.226854	-0.20417	-0.477033	-0.288509	-0.226997	-0.265966	-0.274843	-0.262216	-0.163226	-0.104601	0.0220649
MYBBP1A	-0.794092	-1.07318	-0.639739	-0.776083	-0.963812	-0.719724	-0.908403	-1.02826	-0.317623	-0.922131	-0.847992	-0.339054	-0.711707	-0.772532	-0.957104	-0.874845	-0.850353	-0.929805	-1.05422	-0.671526	-1.078	-0.865317	-1.04561	-0.997958	-0.686314	-1.26899	-0.825205	-1.18993	-0.392997	-0.764543	-0.579804	-1.02623	-0.512467	-1.18525	-0.873664	-0.92139	-0.459857	-0.902114	-0.976174	-1.03567	-0.924401	-0.996636	-0.845159	-1.23792	-0.777224	-0.481836	-0.98145	-0.840387	-1.13681
MYH9	-0.611696	-1.19181	-0.616238	-0.747361	-0.744322	-1.15785	-0.52215	-1.32621	-0.717504	-0.413284	-0.247052	-0.234181	-0.270256	-0.95737	-0.96519	-0.924423	-0.956474	-0.449278	-0.626646	-0.89083	-0.721709	-0.79132	-0.637609	-1.49303	-1.12461	-0.701646	-0.31498	-1.11249	-0.445217	-0.174928	-0.645996	-0.255173	-0.469866	-0.472064	-0.887806	-0.656647	-0.249963	-0.0845785	-0.319479	-0.0627109	-0.210413	-0.693585	-0.781546	-0.202105	-1.13688	-0.217462	-0.528185	-0.227935	-0.76249
MYO1C	-0.136731	-0.312567	0.00298022	-0.0524542	-0.137229	-0.0105892	-0.065195	0.0280635	-0.00062298	0.0312477	0.204059	-0.00459356	-0.159148	-0.177099	-0.0624872	-0.0377301	0.0247485	-0.0294003	-0.0951432	-0.00859279	-0.121849	-0.0688907	-0.112857	-0.039288	0.0267249	-0.0907724	0.056677	0.109127	0.127698	-0.155002	-0.0309114	-0.0293744	0.0573346	0.00465077	-0.0106372	0.0220995	-0.106791	-0.107834	-0.179596	0.0908915	0.0463537	-0.0597472	-0.0255115	0.0445126	-0.121136	-0.086113	0.138489	-0.122111	0.00690656
NAT10	-1.26581	-1.32414	-1.22649	-1.34013	-0.87027	-1.04217	-1.16438	-0.85679	-1.05491	-0.998413	-0.929496	-1.61446	-1.4761	-1.27672	-1.27903	-1.2103	-1.46343	-1.04448	-1.32955	-1.16118	-1.3238	-1.29178	-1.13838	-1.39963	-1.23411	-1.03283	-1.14529	-0.988116	-0.47485	-1.46483	-1.13134	-1.17736	-1.40682	-1.27334	-1.06491	-0.965244	-1.17421	-1.08272	-1.23555	-1.28856	-1.20418	-1.36286	-1.44643	-1.24716	-1.11363	-1.01924	-0.831718	-1.35645	-1.47374
NCL	-1.13159	-0.882379	-1.28832	-0.798871	-0.95465	-0.476599	-0.845291	-0.747301	-0.73846	-0.721116	-0.650685	-1.44136	-1.37028	-1.02222	-0.847652	-0.784413	-0.901309	-0.849522	-1.21444	-0.863514	-0.978499	-1.08202	-0.986861	-0.831939	-0.766977	-0.82753	-0.936241	-1.09506	-1.2652	-0.51954	-0.870109	-0.838946	-0.743172	-0.439895	-0.732722	-0.909618	-0.649607	-0.996411	-0.771968	-0.883067	-0.926785	-0.678239	-1.29282	-1.07792	-0.789372	-0.91542	-0.962487	-1.29701	-0.693457
NCOA5	-0.187058	-0.107961	-0.0298302	-0.165834	-0.0564304	-0.382683	-0.394759	-0.782355	-0.268785	-0.225421	-0.282496	-0.064174	-0.283646	-0.323222	-0.265721	-0.103606	-0.163232	-0.183102	-0.280751	-0.109926	-0.304576	-0.250499	-0.131589	0.0331517	-0.338858	-0.334654	-0.0423771	-0.228838	-0.102972	-0.082433	-0.195542	-0.339168	-0.29461	-0.135995	-0.0480462	-0.34961	-0.468613	-0.255498	-0.213249	-0.102342	-0.354185	-0.137613	-0.0630067	-0.0881159	-0.153667	-0.270934	-0.383198	-0.416203	-0.200821
NKRF	-0.152903	-0.0762006	-0.228344	-0.275456	-0.131222	-0.107144	-0.210381	-0.17	-0.253405	-0.245517	-0.0788421	-0.0253352	-0.228267	-0.289085	-0.202807	-0.0501405	-0.0925518	-0.197336	-0.133711	-0.15491	-0.146122	-0.202672	-0.124793	-0.282061	-0.13819	-0.264364	-0.196195	-0.237905	-0.0831119	-0.0923942	-0.130741	-0.259822	-0.247128	-0.359255	-0.111775	-0.161356	-0.11865	-0.387263	-0.12679	-0.276071	-0.471712	-0.0418081	-0.205791	-0.0995164	-0.18277	-0.196362	-0.10783	-0.041723	-0.339503
NOC4L	-1.07907	-1.09037	-1.33418	-0.799436	-0.841722	-1.16276	-1.04454	-0.724331	-1.08801	-1.16289	-0.899221	-1.30024	-1.54457	-1.3071	-1.16511	-1.17844	-1.23985	-1.03991	-1.29104	-1.0519	-1.53108	-1.21528	-1.19931	-1.29432	-0.83728	-1.12305	-1.11646	-0.759799	-0.734344	-1.59987	-1.16277	-0.964803	-0.951383	-1.11702	-1.17856	-0.990164	-1.07744	-1.1483	-1.23196	-1.26555	-1.18923	-1.00911	-1.20636	-1.17887	-0.931108	-1.20023	-1.37696	-1.54328	-1.30381
NOL6	-0.973576	-1.44687	-1.22768	-1.04056	-0.870136	-0.699166	-1.04553	-1.0078	-1.2261	-0.865233	-1.01046	-0.708247	-1.15686	-1.40673	-1.28811	-1.02963	-1.15212	-1.04357	-1.35226	-1.30115	-1.28367	-1.27592	-1.26717	-1.26921	-0.995518	-1.12697	-1.25724	-0.81304	-0.948105	-1.06396	-1.12571	-1.12357	-1.47314	-1.29734	-1.21151	-0.906916	-1.04921	-1.39511	-1.43072	-1.23135	-1.4272	-1.22139	-1.29323	-1.58297	-0.860461	-1.05465	-0.697315	-1.50474	-0.831955
NONO	-0.195328	-0.406192	-0.315154	-0.276521	-0.0885944	-0.371717	-0.362764	-0.306611	-0.197298	-0.281076	-0.134883	-0.0469794	-0.310323	-0.195125	-0.281623	-0.180497	-0.105442	-0.177385	-0.239618	-0.143602	-0.316449	-0.250498	-0.306729	-0.165488	-0.180575	-0.159318	-0.371199	0.0631491	-0.248734	0.0153641	-0.110984	-0.193423	-0.815285	-0.203952	-0.38399	-1.03893	0.0381888	-0.0730751	-0.353175	-0.285313	-0.13296	-0.36582	-0.171392	-0.0632849	-0.419855	-0.0499232	-0.316219	-0.684203	-0.114796
NOP2	-1.31257	-1.2697	-1.30326	-1.45997	-1.19978	-0.88474	-1.11403	-0.884447	-1.4514	-1.26159	-1.15295	-1.24145	-1.37671	-1.25851	-1.1378	-1.1977	-1.38879	-1.35619	-1.61419	-0.863969	-1.15761	-1.39114	-1.31833	-1.12077	-1.28179	-1.03002	-1.26513	-1.39232	-0.981293	-1.25005	-0.758318	-1.31299	-1.25145	-1.23872	-0.970853	-1.18356	-1.27396	-1.16991	-1.19724	-1.22612	-1.45998	-1.17167	-1.56653	-1.35736	-1.33997	-1.3137	-0.90548	-1.39493	-1.025
NOP56	-1.48631	-1.39411	-1.40368	-1.05735	-1.30471	-1.20128	-1.68479	-1.20208	-1.27184	-1.38098	-1.37101	-1.23606	-1.63904	-1.57031	-1.53185	-1.44481	-1.51073	-1.34693	-1.49163	-1.36641	-1.51296	-1.61086	-1.4897	-1.4161	-1.77526	-1.07614	-1.20548	-1.28591	-1.71937	-1.4264	-0.946145	-1.18532	-1.18424	-1.43262	-1.46678	-1.60748	-1.5337	-1.51596	-1.31042	-1.58492	-1.4164	-1.34647	-1.51345	-1.59484	-1.20212	-1.09059	-1.33616	-1.37658	-1.61074
NOP58	-1.68697	-1.46474	-1.34303	-1.3755	-1.63866	-1.51966	-1.4968	-1.36934	-1.36101	-1.53263	-1.55386	-1.39114	-1.54562	-1.406	-1.58271	-1.42736	-1.63248	-1.39555	-1.40346	-1.6282	-1.62751	-1.37195	-1.47334	-1.65357	-1.54634	-1.36152	-1.31089	-1.31145	-1.41421	-1.23747	-1.66189	-1.33038	-1.22986	-1.47815	-1.44289	-1.46873	-1.43192	-1.47138	-1.54742	-1.57558	-1.68262	-1.45529	-1.73175	-1.61475	-1.273	-1.11724	-1.44764	-1.56846	-1.41198
NPM1	-0.962063	-0.840055	-0.76345	-1.18805	-0.85726	-0.845691	-0.578314	-0.839088	-0.810164	-0.846225	-0.956105	-0.35367	-0.55108	-0.659492	-0.7186	-0.862975	-0.894274	-0.85026	-0.793549	-0.92979	-0.722388	-0.66727	-0.891431	-0.620291	-0.769257	-0.50222	-1.03941	-0.440524	-0.970827	-0.736179	-0.513541	-0.621074	-0.952728	-0.657703	-0.848757	-0.628587	-0.825187	-0.700332	-0.761295	-0.747309	-0.819997	-0.997959	-1.00763	-1.04141	-0.648763	-0.755747	-0.700247	-0.715247	-0.89844
NPM3	-0.305841	-0.137115	-0.122988	-0.137212	0.00364306	-0.188943	-0.240301	-0.387841	-0.237492	-0.353844	-0.343758	-0.420269	-0.232216	-0.258906	-0.295952	-0.324478	-0.353277	-0.3094	-0.708505	-0.322839	-0.284312	-0.323539	-0.407584	-0.159881	-0.717265	-0.340933	-0.383557	-0.329511	-0.425489	-0.399707	-0.330743	-0.455433	-0.04096	-0.181716	-0.195164	-0.394867	-0.265421	-0.1369	-0.353973	-0.215144	-0.210141	-0.130271	-0.202271	-0.408612	-0.397132	-0.352305	-0.254605	-0.0581644	-0.215758
PA2G4	-0.571131	-0.61741	-0.762216	-0.464384	-0.591108	-0.122504	-0.357162	-0.518472	-0.613266	-0.675939	-0.559663	-0.245316	-0.243742	-0.641203	-0.612264	-0.499382	-0.632105	-0.555967	-0.612401	-0.767914	-0.551001	-0.584256	-0.522452	-0.506574	-0.410507	-0.725618	-0.419401	-0.633793	-0.609354	-0.219257	-0.519214	-0.612204	-0.520846	-0.137008	-0.344893	-0.311934	-0.745904	-0.444316	-0.562969	-0.700612	-0.604861	-0.403314	-0.68762	-0.45875	-0.475876	-0.625227	-0.535089	-0.458771	-0.596834
PABPC1	-1.02847	-1.08696	-1.04979	-1.06498	-0.898496	-0.695289	-0.569456	-0.582959	-0.763381	-0.747199	-0.978931	-0.737142	-0.271114	-0.818208	-0.781563	-1.0546	-1.11967	-0.89036	-0.700677	-1.26051	-1.18794	-0.738013	-0.846375	-1.09734	-0.811181	-0.739177	-0.979909	-0.745974	-1.45366	-0.985175	-1.33454	-0.869249	-0.834494	-0.559459	-1.05325	-0.985348	-1.02359	-1.27716	-0.934747	-1.03389	-0.619833	-0.908585	-0.820487	-0.94523	-0.845502	-0.849561	-0.798806	-0.830958	-1.1512
PABPC4	-0.22248	-0.116362	-0.13437	-0.0522792	-0.153275	0.00454633	-0.00426337	0.0248041	-0.0494418	-0.032737	-0.028775	-0.0513676	-0.38568	-0.107367	-0.0666155	0.061332	0.0389022	-0.171854	-0.210142	-0.0650063	-0.0839665	-0.0260402	-0.0897162	0.00550711	-0.113103	-0.324684	0.00891882	-0.277055	0.0271143	0.0686582	0.0479567	-0.0146927	-0.136646	-0.00831734	-0.165573	-0.105526	-0.109747	0.00258265	-0.116345	-0.203731	-0.157708	-0.0741664	-0.0737699	-0.110359	0.0345543	-0.0705326	-0.0513566	0.111465	-0.0188682
PARP1	-0.46482	-0.204546	-0.325323	-0.108656	-0.301432	-0.18406	-0.208942	-0.164105	-0.327761	-0.228774	-0.401764	-0.357209	-0.0589817	-0.37347	-0.180963	-0.26115	-0.21256	-0.270659	-0.191595	-0.114858	-0.231774	-0.2134	-0.0966387	-0.286685	-0.110471	0.0232549	-0.249902	-0.0391861	-0.044424	0.026219	-0.191304	-0.139709	-0.164248	-0.182999	-0.166382	-0.166393	-0.164593	-0.129074	-0.315174	-0.239588	-0.0218894	-0.347283	-0.457522	-0.286281	-0.164669	-0.11663	-0.31287	-0.281441	-0.322932
PCBP1	-1.47995	-1.50252	-1.1428	-1.13503	-1.52131	-1.29946	-0.7451	-1.17712	-1.17051	-1.44521	-1.48313	-1.27129	-1.68907	-1.29733	-1.27767	-1.44743	-1.43101	-1.57403	-1.28751	-1.52583	-1.62323	-1.26443	-1.4958	-1.10466	-1.24575	-1.52741	-1.44184	-1.32659	-1.68467	-1.24228	-1.39197	-1.4123	-0.943091	-1.01562	-1.3477	-1.45478	-1.18535	-1.19428	-1.25442	-0.706952	-1.35217	-1.35073	-1.52625	-1.40544	-1.13907	-1.54111	-1.72179	-1.599	-1.37899
PCBP2	-1.28007	-1.1819	-0.969493	-1.27012	-1.30924	-1.10422	-1.22172	-1.35253	-1.2926	-1.30678	-1.14361	-1.34134	-1.33543	-1.25715	-1.28858	-1.24133	-1.12824	-1.20025	-1.26196	-1.30768	-1.06525	-1.454	-1.53421	-1.02501	-1.13522	-0.926044	-1.37608	-1.14922	-1.35787	-1.12062	-1.21238	-1.40707	-1.35477	-1.46361	-1.15197	-1.36121	-1.09437	-1.07491	-0.951828	-0.709166	-1.122	-1.20994	-1.44818	-0.871275	-1.19932	-0.930013	-1.32851	-1.5898	-1.33172
PDCD11	-1.46389	-1.17798	-1.35474	-1.32243	-1.24395	-1.44368	-1.17774	-1.08654	-1.13779	-1.19852	-0.922283	-1.28628	-1.54196	-1.32311	-1.26207	-1.24549	-1.3037	-1.13853	-1.26779	-1.41206	-1.20757	-1.48173	-1.54853	-1.28112	-1.23449	-0.873223	-0.803605	-0.986907	-0.967267	-1.30046	-1.33307	-1.25546	-1.24775	-1.49891	-1.12481	-1.08439	-1.13235	-1.31293	-1.25407	-0.877588	-1.28035	-1.29008	-1.1725	-1.55658	-1.13999	-1.39098	-1.09814	-1.26166	-1.23772
PFN1	-1.11436	-0.9885	-0.282742	-0.782244	-1.38124	-0.849083	-0.830401	-1.15017	-0.387526	-0.585663	-0.806632	-0.901345	-0.638014	-1.28214	-0.941698	-0.838214	-0.177122	-0.886206	-0.253955	-0.346734	-1.01837	-0.827496	-0.710577	-0.830589	-0.82672	-0.792417	-1.23097	-1.37088	-0.419532	-0.591941	-1.07306	-1.11347	-0.869229	-0.581886	-1.11268	-1.01471	-0.982766	-1.00575	-1.13529	-0.548596	-0.792349	-0.440529	-0.515257	-1.29507	-0.819752	-1.27064	-1.03738	-1.07419	-0.709432
PGAM5	0.0607672	-0.174448	-0.251567	-0.0346387	-0.0971456	-0.0371147	-0.0403183	-0.11946	-0.139177	0.0235452	-0.447797	0.0768156	-0.0191212	-0.0699667	-0.0689089	0.0985175	-0.0419861	-0.169387	0.0934476	-0.0847316	-0.196063	0.0968433	-0.0315738	0.00714511	-0.163573	-0.308748	0.0146626	0.162166	0.0704739	-0.00159978	-0.0284769	-0.145564	-0.024433	0.0404078	-0.0638377	-0.138041	-0.282278	-0.0959692	-0.0108221	-0.312965	0.212084	-0.0577837	0.0181022	0.00991786	0.20031	-0.229846	-0.190962	0.0632285	-0.0961321
PHGDH	-0.310516	-0.193844	-0.0764701	0.0522666	-0.181222	0.103683	-0.175393	-0.083209	-0.0599371	-0.177261	-0.0839814	-0.312899	-0.0773902	-0.122413	-0.161498	0.0968978	-0.305915	-0.144553	-0.0518963	-0.147437	0.152361	-0.0905611	-0.134431	-0.246662	-0.0512876	-0.143494	-0.149105	0.108468	0.0999483	-0.0607902	-0.104815	0.0177541	-0.154528	0.0480353	-0.142744	0.182436	-0.0958516	0.0873341	-0.14103	0.00789892	-0.0872885	0.0104525	0.0448018	0.215552	-0.0439754	0.0959537	-0.37314	-0.18207	0.0492343
PLEC	-0.247453	-0.17965	-0.0802657	-0.155803	-0.540318	0.0370575	-0.223958	-0.329413	0.0213194	-0.347938	-0.0493348	-0.592842	-0.152479	-0.12911	-0.305547	-0.235524	-0.27542	-0.242788	-0.200943	-0.357074	-0.476114	-0.238774	-0.0753798	-0.188085	-0.457761	-0.25667	-0.193609	0.0952102	-0.735607	-0.151828	-0.210109	-0.162546	0.0220855	-0.174816	-0.197077	-0.134991	-0.342849	-0.223478	-0.235859	-0.277362	-0.460748	-0.213476	-0.267951	-0.242677	-0.257186	-0.27431	-0.201548	-0.478215	-0.347483
PLRG1	-1.04104	-1.17774	-1.19227	-0.720072	-1.32048	-0.864954	-1.21042	-1.25166	-1.1052	-1.25185	-1.23684	-1.50084	-0.909117	-1.21679	-1.05716	-1.00177	-1.14715	-1.01043	-0.968168	-1.04391	-1.32693	-0.902795	-1.01974	-0.823298	-1.03145	-1.00045	-0.926912	-1.27865	-1.03901	-1.05823	-1.25641	-1.07505	-0.963903	-0.96159	-0.912404	-1.28186	-0.891043	-0.951898	-0.952661	-0.936502	-0.991304	-0.954428	-0.937328	-1.04177	-1.20139	-0.899975	-1.21005	-0.896767	-1.02805
POP1	-1.11986	-1.16284	-1.36792	-0.836522	-0.993568	-1.15517	-1.04642	-0.896404	-0.922368	-0.916218	-0.898476	-1.02151	-1.15418	-0.944771	-0.888317	-1.05798	-1.46497	-0.872749	-1.09069	-0.955698	-0.848089	-1.10774	-0.982737	-1.20857	-0.918349	-0.896661	-0.985584	-0.771359	-0.986246	-0.818131	-0.979908	-0.874062	-1.3767	-1.15186	-0.865663	-0.919348	-0.950791	-1.20817	-1.21226	-1.00646	-0.611703	-1.23553	-1.54097	-1.06831	-0.916034	-0.877893	-1.13876	-0.97735	-0.920244
PPP2R1A	-0.909998	-0.369411	-0.621869	-0.694064	-0.503933	-0.864093	-0.391602	-1.252	-0.50523	-0.850285	-1.71443	-1.0139	-1.21806	-0.591971	-1.41225	-0.605877	-0.939815	-0.870956	-1.41801	-1.53321	-1.31238	-1.31852	-0.680322	-1.36082	-0.102037	-0.811036	-1.04197	-0.272969	-1.13885	-0.717213	-0.878831	-0.647231	-0.720852	-0.559573	-0.89933	-0.884274	-1.6873	-0.707717	-0.439968	-0.766997	-0.516687	-1.31558	-0.763199	-0.923318	-0.525258	-0.834965	-0.211993	-1.30824	-0.521551
PRDX1	0.0485814	-0.0542967	-0.0947452	-0.120559	-0.361465	-0.122588	0.10697	0.029517	-0.139414	-0.0656568	-0.307285	-0.193275	-0.652098	0.00145633	0.0387613	0.0985741	0.0429488	0.0892276	0.0444172	-0.0858476	0.0954908	0.191273	0.0478655	0.174717	0.035624	0.00452751	0.111403	-0.236198	0.0263265	0.0323208	0.125011	0.163127	0.115761	0.0811075	0.0531583	0.0965404	-0.121607	-0.168659	0.11237	0.0101685	-0.0582442	0.10417	0.0316794	0.0517983	0.0502184	-0.21914	0.0814783	0.0666591	0.171977
PRPF19	-2.11142	-2.08404	-2.01273	-2.14198	-2.10771	-1.94877	-1.99901	-1.7797	-1.76563	-2.00081	-2.04146	-2.15062	-1.81688	-1.83836	-1.93876	-2.09886	-2.1114	-1.99302	-2.01532	-2.04338	-1.88588	-1.89231	-2.06968	-1.72394	-1.78564	-1.92635	-2.1175	-1.62981	-1.56436	-1.91038	-1.96173	-1.96464	-1.68944	-2.02976	-1.89302	-1.89487	-2.13192	-1.70636	-1.92084	-2.17096	-1.80102	-1.95487	-1.79485	-1.98566	-2.07907	-2.2052	-1.85283	-1.50635	-1.97455
PRPF3	-1.02972	-1.33762	-1.10708	-0.860088	-1.30221	-0.863594	-1.02229	-0.903497	-0.887044	-0.885783	-1.17348	-1.38	-0.682645	-0.818764	-1.13145	-1.03217	-1.05662	-1.13944	-0.909515	-1.06386	-1.10725	-0.799562	-0.848668	-1.21004	-0.981207	-0.882211	-1.1017	-0.579248	-0.777948	-0.7986	-0.970047	-0.83154	-1.36139	-0.975522	-1.00901	-0.807489	-1.14962	-0.881154	-1.00749	-1.20078	-0.764135	-0.94168	-1.03437	-0.693418	-0.990882	-1.15104	-0.850484	-1.12806	-1.09475
PRPF4	-0.995575	-1.2422	-1.1489	-1.31566	-1.3443	-0.97257	-1.27133	-1.1616	-1.34554	-1.09416	-0.80533	-1.52537	-1.22802	-0.968467	-1.07533	-1.14852	-1.07264	-1.33851	-1.04128	-1.00701	-1.3578	-1.23256	-1.09622	-1.13694	-0.834779	-1.25215	-1.06503	-1.01085	-1.00828	-0.559818	-1.29613	-1.25031	-1.40164	-1.05123	-1.39393	-1.07943	-1.23234	-1.02519	-1.32349	-1.36851	-1.01482	-1.30124	-1.15396	-0.87227	-1.1762	-1.1714	-1.36311	-1.04577	-1.72883
PRPF40A	-0.984571	-0.768079	-1.09904	-0.658661	-1.07603	-0.494935	-0.91371	-0.66062	-0.887777	-0.843784	-1.0023	-0.682191	-0.929246	-0.780071	-0.841875	-0.889374	-0.847008	-0.876547	-0.876162	-1.03269	-0.925921	-0.994661	-0.943081	-0.586553	-0.451853	-0.824274	-0.982084	-0.831683	-1.26769	-0.906022	-0.772869	-0.940906	-0.986996	-0.831766	-0.900735	-0.881692	-0.700731	-0.670896	-0.826789	-1.036	-1.10531	-0.943622	-0.918085	-0.868624	-1.10299	-0.905313	-1.01765	-0.833839	-1.05685
PRPF8	-1.72801	-1.74628	-1.52201	-1.92834	-1.73351	-1.7586	-1.92157	-1.79441	-1.87273	-2.00816	-1.80162	-1.76623	-1.85412	-1.64925	-1.66377	-1.7068	-1.75325	-1.83012	-1.79144	-1.62915	-1.34202	-1.81999	-1.83634	-1.64656	-1.79795	-2.04314	-1.95589	-1.92446	-1.76377	-1.84999	-1.65446	-1.79836	-1.6672	-1.90244	-1.7109	-1.88736	-1.82228	-1.57355	-1.69164	-1.89186	-1.9443	-1.46036	-1.7647	-1.42683	-1.91825	-1.66152	-1.60442	-1.58202	-1.42668
PSIP1	0.118924	0.131655	0.00451039	0.0589143	0.35606	0.157923	-0.0615837	-0.0017356	0.234091	0.187226	0.0491085	0.20325	0.0339562	0.0589525	0.0888435	0.138112	0.175188	0.200697	0.151424	0.0444262	0.126462	0.150321	0.229977	0.211471	0.281416	-0.0381155	0.0654108	-0.0641539	0.0287442	0.038004	0.0401994	0.117399	0.0420539	-0.0950455	0.00445107	0.00731226	0.143757	0.126442	0.228737	0.0819487	-0.0178393	0.14445	0.0376552	0.0486311	0.285881	0.161838	0.00321135	0.0334828	0.119912
PTBP1	-0.535859	-0.423883	-0.824411	-0.913031	-0.508567	-0.442502	-0.857804	-0.107113	-0.849387	-0.847241	-0.00614427	-0.303121	-0.682601	-0.578385	-0.813433	-0.523738	-0.678397	-0.637009	-0.873701	-0.750924	-0.709998	-0.375955	-0.480008	-0.323626	-0.36544	-0.496979	-0.768512	-0.298795	-0.683601	-0.299956	-1.32173	-0.430454	-1.07025	-0.13327	-0.560954	-0.626207	-0.590758	-0.650717	-0.634814	-0.952745	-1.11773	-0.426959	-0.5951	-0.0384594	-0.796697	-0.993403	-0.861934	-0.400094	-0.718191
PWP1	-0.679283	-0.818043	-1.06605	-0.538968	-0.770489	-0.871611	-0.683168	-0.721693	-0.642655	-0.91892	-0.728062	-0.912921	-0.380709	-0.703292	-0.879002	-1.04091	-0.865341	-0.876248	-1.11496	-0.702196	-0.948811	-1.07967	-0.694344	-0.706418	-0.76948	-0.763484	-0.807883	-0.765625	-0.736085	-0.500044	-0.873108	-0.742641	-0.86862	-0.580759	-0.79841	-0.501653	-0.808486	-0.584133	-1.04758	-0.589708	-0.713714	-0.842768	-1.23282	-0.661115	-0.706712	-1.09541	-0.628691	-0.962988	-0.988906
PWP2	-1.04156	-1.4568	-1.29524	-1.37298	-1.25722	-1.13688	-1.18534	-1.18288	-1.3337	-1.19355	-1.09955	-1.53692	-1.62993	-1.35819	-1.12002	-1.25223	-1.30723	-1.33352	-1.45659	-1.40852	-1.27342	-1.01472	-1.31484	-1.3471	-1.11546	-0.741591	-1.25271	-1.26468	-1.14388	-1.33052	-1.27764	-1.17327	-1.42155	-1.22825	-1.31353	-1.61387	-1.2747	-1.19926	-1.43522	-1.26679	-1.39557	-1.19619	-1.51155	-1.7012	-1.11602	-1.17681	-0.942383	-1.18236	-1.08871
RAB7A	-0.531703	-0.453575	-0.0768062	-0.295761	-0.572395	-0.350422	-0.61494	-0.318547	-0.274429	-0.245789	-0.535312	-0.367531	-0.393398	-0.346925	-0.0609983	-0.604924	-0.447389	-0.211322	-0.558787	-0.394021	-0.296201	-0.44843	-0.30357	-0.190915	-0.236653	-0.555859	-0.785566	-0.298235	-0.447636	-0.242655	-0.358254	-0.531553	-0.346404	0.0243941	-0.21743	-0.226101	-0.369358	-0.846171	-0.118997	-0.431182	-0.250874	-0.356882	-0.274076	-0.48492	-0.447862	-0.602921	-0.48649	-0.666565	-0.429381
RAC2	-0.0916509	-0.0748127	-0.0207154	-0.00791047	-0.123592	-0.230214	-0.110343	-0.0888878	-0.0104956	-0.0689609	0.0446569	0.128271	0.0777172	-0.044362	-0.089219	-0.154779	0.0544015	-0.0840153	-0.0949078	-0.153897	-0.0888278	0.0591042	-0.0174848	-0.217621	-0.169848	-0.0484445	0.11159	-0.0621023	0.230515	-0.129501	-0.337685	-0.0580953	0.0234655	-0.0924408	-0.0317046	-0.0692505	0.141618	-0.0522504	-0.150449	0.0312912	0.0159518	-0.0855514	-0.0133614	-0.0389382	0.127868	-0.0353736	-0.0441782	-0.00403394	-0.155052
RALY	-0.139534	-0.175628	0.0949266	-0.00223251	-0.131966	-0.432769	-0.0425408	-0.213715	-0.247135	0.0845955	-0.222939	0.031899	-0.0712804	-0.292262	-0.0917523	-0.154572	-0.0129795	-0.0823387	-0.0452421	-0.0420088	-0.150856	0.0805817	-0.134131	-0.0989409	-0.130632	0.00550367	-0.175578	-0.33895	0.0901103	-0.0339226	-0.163388	0.0376758	-0.246181	-0.120524	-0.302827	-0.181073	0.00530469	-0.170447	-0.063627	0.014365	0.0594634	-0.0531918	-0.00131055	-0.139529	0.111181	0.193584	-0.101594	0.0712573	-0.242538
RARS	-0.793473	-1.05581	-0.571293	-0.723067	-0.740584	-0.817998	-0.732129	-0.712779	-0.869003	-0.839405	-0.768077	-0.548395	-0.737866	-0.975502	-0.751267	-0.756037	-0.858145	-0.910831	-0.8678	-0.903613	-0.901941	-0.732132	-0.905267	-0.798775	-0.818795	-0.62249	-0.834057	-1.27962	-0.852345	-0.719819	-0.648989	-0.838407	-0.66827	-0.990651	-0.83099	-0.930609	-0.882946	-0.900146	-0.934228	-1.05134	-0.941271	-0.49188	-0.944193	-0.863328	-0.684569	-0.945545	-0.685087	-0.600968	-0.692742
RBBP4	-0.954063	-1.31072	-0.984676	-1.0526	-0.752366	-0.978054	-0.974341	-1.05177	-1.29046	-0.870733	-1.18189	-0.977344	-1.24746	-1.15989	-0.977608	-0.944689	-1.32083	-0.9255	-0.915299	-1.31566	-0.937599	-0.89372	-1.01434	-0.98855	-1.24306	-1.14021	-1.24131	-0.882727	-1.06339	-1.1294	-1.3075	-1.10898	-1.30582	-1.05203	-1.09349	-1.03138	-1.26303	-0.951235	-0.812002	-0.974627	-1.33275	-1.06618	-0.705951	-1.20065	-1.01372	-1.44412	-0.850915	-1.18888	-1.23045
RBBP6	-0.910927	-0.80148	-0.772123	-1.02696	-0.767927	-0.951167	-0.905272	-1.00679	-0.960045	-0.942993	-1.0344	-0.952922	-0.783686	-0.801351	-1.11089	-0.96244	-0.903345	-0.965252	-0.933892	-1.03094	-0.948806	-0.98625	-0.951356	-1.06301	-0.676876	-0.982716	-0.864972	-0.689406	-1.48461	-0.660932	-1.10967	-0.957732	-1.04902	-1.17225	-0.849574	-0.89432	-1.13316	-0.974437	-0.812368	-0.820954	-0.822247	-0.896702	-1.08729	-0.951707	-0.803752	-0.563398	-0.788823	-0.677019	-1.14441
RBM14	-1.64966	-1.61671	-1.42867	-1.28612	-1.58008	-1.2911	-1.25678	-1.77786	-1.16475	-1.27618	-2.0476	-1.15548	-1.70312	-1.45017	-1.35756	-1.34664	-1.14917	-1.15849	-1.06945	-1.42412	-1.34083	-1.54675	-1.44505	-1.05314	-1.55933	-1.48201	-1.85513	-2.14833	-1.97454	-1.1599	-1.75407	-1.39536	-1.43015	-1.16677	-1.37516	-1.48351	-1.37981	-1.8358	-0.953418	-1.68016	-1.8654	-1.49111	-1.96177	-1.69409	-1.5475	-1.81284	-1.54247	-1.32394	-1.26286
RBM15	-0.161985	-0.407341	-0.474423	-0.651535	-0.0380034	-0.564936	-0.706033	-0.531908	-0.39116	-0.287493	-0.722413	-0.0736194	-0.255749	-0.546784	-0.38837	-0.432627	-0.429863	-0.21545	-0.288585	-0.329358	-0.160239	-0.119476	-0.703983	-0.372999	-0.48819	-0.44738	-0.649097	0.0307492	-0.468857	-0.150275	-0.515482	-0.563492	-0.214265	-0.278932	-0.402552	-0.434356	-0.447674	-0.609341	-0.356118	-0.269572	-0.395429	-0.281572	-0.113045	-0.713749	-0.838103	-0.135529	-0.490205	-0.178584	-0.637133
RBM25	-1.3663	-1.32258	-1.32215	-1.43804	-1.10812	-1.17916	-1.2128	-0.883886	-1.08326	-1.35996	-1.04515	-0.782103	-1.47638	-0.967826	-1.41109	-1.3168	-1.20876	-1.2121	-1.12654	-1.28305	-1.18704	-1.28387	-1.1631	-0.977647	-1.04224	-0.76422	-1.02692	-0.472177	-1.05698	-0.806397	-1.47605	-1.06788	-1.64891	-1.3284	-1.24233	-1.3229	-0.929876	-0.989071	-1.17162	-0.964485	-0.942287	-1.43025	-1.32232	-1.23663	-1.41804	-0.878863	-1.22388	-1.15844	-1.74394
RBM39	-1.41254	-1.12524	-1.26901	-1.43103	-1.33789	-1.17892	-1.56733	-1.41056	-1.3427	-1.47565	-1.3865	-1.43582	-0.994792	-1.22276	-1.4212	-1.35841	-1.42348	-1.31369	-1.51902	-1.53689	-1.38271	-1.63628	-1.52821	-1.82824	-1.47176	-1.577	-1.38679	-1.44868	-1.53432	-1.44741	-1.49637	-1.22973	-1.1495	-1.44675	-1.36845	-1.20988	-1.28594	-1.65156	-1.37885	-1.38238	-1.42091	-1.25622	-1.72581	-1.14112	-1.36687	-1.1719	-1.61233	-1.02943	-1.59785
RBM4	-0.17723	-0.836624	-0.258548	-0.330956	0.045164	-0.169546	-0.402671	-0.0615248	-0.470627	-0.416804	-0.216149	-0.285571	-0.125127	-0.350984	-0.282217	-0.426764	-0.307207	-0.166281	-0.332342	-0.0902882	-0.506041	-0.297858	-0.518098	-0.522069	-0.396331	-0.270821	-0.594582	-0.160932	-0.374439	-0.698445	-0.49018	-0.130925	-0.314598	-0.311408	-0.267672	-0.199951	-0.178978	-0.193044	-0.111058	-0.462175	-0.320445	-0.374264	-0.34855	-0.325444	-0.340903	-0.29941	-0.188756	-0.783409	-0.182604
RBMX	-1.09548	-1.13688	-0.912837	-1.38522	-0.755022	-0.904616	-1.20587	-1.23531	-0.981287	-0.963966	-0.973452	-0.771313	-0.957019	-0.855427	-1.08814	-1.1307	-0.976116	-1.08987	-1.06314	-0.997413	-1.15501	-1.08346	-1.03139	-0.601775	-1.09166	-0.821375	-1.24121	-0.995227	-0.895037	-0.854499	-0.832816	-1.27715	-0.974289	-0.911288	-1.00529	-0.907263	-1.18637	-0.87622	-0.974088	-1.32074	-0.892906	-0.990852	-1.03396	-1.03485	-1.01285	-0.87329	-0.827654	-0.943546	-1.11127
RCC2	-0.385607	-0.235259	0.00629172	-0.171637	-0.0767856	-0.188735	-0.278479	-0.395273	-0.106601	-0.310054	-0.0259307	-0.0272074	0.0449004	-0.400504	-0.170403	-0.13087	-0.32615	-0.216028	-0.0631203	-0.258686	-0.183514	-0.293461	-0.199685	-0.106903	-0.0253568	0.0300897	-0.0905888	-0.0014742	-0.240701	-0.0170918	-0.140966	-0.344705	-0.100905	-0.123977	-0.25257	-0.0772155	-0.204089	-0.0868439	-0.158924	-0.409565	-0.229653	-0.212533	-0.455903	-0.532061	-0.111954	-0.308783	-0.252639	-0.154137	-0.129144
RNASEH1	-0.0309984	-0.0377465	-0.100291	-0.245111	0.0036458	-0.305312	-0.159047	-0.195514	-0.212533	-0.176108	-0.247197	0.175479	0.0702912	-0.183916	-0.242453	-0.301862	-0.087354	-0.387177	-0.039452	-0.363393	-0.0341381	-0.261071	-0.374568	0.00858772	-0.161868	-0.313136	-0.314232	-0.510898	-0.141324	-0.0444085	-0.222324	-0.134252	-0.0113286	-0.14344	-0.130986	-0.0722009	0.130243	-0.108844	-0.181126	-0.149907	-0.231715	-0.0904934	-0.183624	-0.153106	-0.245031	0.0422275	-0.269545	-0.0511336	-0.272595
RNASEH2A	-0.414947	-0.179166	-0.81913	-0.205886	-0.0616734	-0.0194584	-0.358234	-0.476634	-0.446382	-0.160563	-0.203479	-0.152446	-0.45746	-0.086321	-0.54576	-0.078056	-0.164312	-0.254985	-0.258482	-0.187835	-0.830765	-0.379163	-0.30798	-0.246793	-0.258704	-0.0175045	-0.255154	-0.360916	-0.342409	-0.370682	0.0272984	-0.0111923	-0.192717	-0.0358483	-0.292602	-0.275032	-0.214404	-0.199588	-0.263093	-0.325867	-0.272566	-0.199199	-0.273162	-0.116661	-0.253703	-0.159747	-0.138116	-0.0448642	-0.560787
RNASEH2B	-0.0714327	0.0865375	-0.164595	0.0284547	0.0840127	0.195818	0.0476968	-0.00221539	-0.047107	0.128899	0.179794	-0.277434	-0.0245184	0.063265	-0.200422	-0.00463399	0.0575956	0.15898	-0.0511914	-0.108925	-0.0748516	-0.0387154	0.115703	0.215116	0.102917	0.0892104	-0.0926887	0.0515832	0.0816313	0.119484	0.0633889	0.44302	-0.117715	-0.050342	0.057005	0.192302	0.248335	-0.0586427	0.0749727	0.152177	0.271962	-0.0321789	-0.00104565	-0.00276827	0.434485	0.184763	0.206061	0.213034	-0.18359
RNASEH2C	-0.532829	-0.168237	-0.253468	-0.304976	-0.0706541	-0.171364	-0.250213	-0.446602	-0.513821	-0.0781745	-0.410691	-0.147277	-0.687672	-0.159788	-0.416287	-0.246187	-0.0372932	-0.251752	-0.345356	-0.321981	-0.53477	-0.385145	-0.331153	-0.185305	-0.0728565	-0.0150339	-0.462567	-0.157167	-0.100179	-0.399901	-0.215649	-0.116513	-0.322543	-0.137026	-0.313497	-0.165782	-0.0909867	-0.198225	-0.134806	-0.204716	-0.276516	-0.414328	-0.379112	0.126449	-0.171639	-0.44785	0.0307632	-0.311242	-0.500302
RTCB	-0.693484	-1.15543	-0.915682	-1.11828	-0.678022	-0.578736	-0.705604	-0.770874	-0.907204	-0.881141	-0.965394	-1.22608	-0.934597	-1.05752	-0.820614	-0.62547	-0.754039	-0.49055	-1.06596	-0.501743	-1.19875	-0.799032	-0.735886	-0.704227	-0.858032	-0.824698	-0.939135	-1.09695	-0.801989	-0.893682	-0.962531	-0.6365	-1.13172	-1.12739	-0.605116	-0.682669	-0.793832	-0.725715	-0.826671	-0.791122	-0.756315	-1.20068	-1.21719	-0.928797	-0.703434	-0.921306	-0.642503	-1.11217	-0.660831
RUVBL2	-1.78499	-1.84349	-1.54398	-1.6593	-2.10953	-2.10831	-1.80594	-1.91245	-1.76307	-1.69424	-1.7536	-2.08917	-1.55149	-1.85239	-1.76787	-1.64727	-1.90146	-1.76999	-1.86818	-1.74962	-1.75437	-1.86129	-1.68224	-1.9054	-1.7102	-1.6794	-1.64485	-1.61259	-1.41327	-1.37477	-1.86162	-1.79774	-1.7732	-1.92481	-1.71327	-1.72883	-1.92066	-1.96283	-1.78487	-1.78207	-1.74339	-1.83012	-1.50317	-1.5614	-1.40763	-1.57791	-1.68974	-1.73518	-1.70196
SAFB	-0.256294	-0.397522	-0.273801	-0.08125	-0.259527	-0.285373	-0.364259	0.042831	-0.231692	-0.614545	-0.235689	-0.13648	-0.50314	-0.139377	-0.377073	-0.330584	-0.180164	-0.364071	-0.730312	-0.210908	-0.236627	-0.291331	-0.26018	-0.137111	-0.0684433	-0.108863	-0.219272	-0.115706	-0.368603	-0.0932117	-0.0998283	-0.230752	-0.252328	-0.168536	-0.141056	-0.230055	-0.286971	-0.108186	-0.235533	-0.337708	0.00907886	-0.290714	-0.208221	-0.3321	-0.248043	-0.186119	-0.290039	-0.372523	-0.491158
SART1	-1.23189	-1.11859	-1.4258	-0.879292	-1.19233	-1.00886	-1.34117	-0.967181	-0.98708	-1.01105	-1.07599	-0.345454	-0.715479	-0.851404	-1.34214	-1.13038	-1.28919	-1.31409	-0.978111	-1.20286	-1.09039	-1.12332	-1.25737	-1.15643	-1.18756	-1.74473	-1.16116	-1.47939	-1.47525	-1.39533	-0.866195	-1.12466	-0.927152	-1.31967	-0.995905	-1.10959	-1.33223	-1.1941	-0.94189	-1.15328	-1.12333	-1.35191	-1.74195	-0.918356	-1.15926	-0.847429	-1.26931	-0.768906	-1.6321
SART3	-1.5269	-1.44492	-1.51945	-0.964068	-1.01655	-1.35875	-1.47662	-1.52101	-1.40302	-1.52666	-1.17279	-0.930686	-1.8902	-1.4994	-1.49802	-1.39224	-1.44582	-1.26183	-1.47439	-1.31909	-1.50909	-1.48216	-1.58036	-1.41632	-1.60886	-1.56376	-1.50389	-1.56369	-1.28525	-1.51268	-1.41061	-1.41115	-1.2488	-1.37711	-1.26656	-1.27201	-1.52284	-1.49363	-1.62788	-1.66702	-1.50213	-1.22479	-1.24025	-1.67741	-1.35037	-1.15644	-1.43305	-1.39136	-1.48442
SERBP1	-0.567862	-0.642253	-0.932951	-0.288922	-0.801243	-0.303781	-0.360585	-0.028032	-0.632267	-0.375885	-0.33218	-1.1969	-0.186152	-0.570078	-0.417615	-0.481572	-0.549869	-0.604854	-0.581202	-0.568911	-0.473182	-0.462368	-0.702266	-0.533191	-0.235369	-0.169366	-0.502483	-0.916514	-0.181916	-0.387639	-0.615929	-0.306244	-0.625619	-0.246566	-0.747263	-0.265522	-0.510508	-0.449442	-0.50032	-0.714164	-0.621422	-0.618411	-0.23155	-0.324923	-0.235958	-0.578274	-0.590804	-0.704552	-0.709987
SETX	-0.319506	-0.336945	-0.555102	-0.176522	-0.24968	-0.436008	-0.12171	-0.215357	-0.278611	-0.229666	0.0127597	-0.250569	-0.3208	-0.266411	-0.337047	-0.184803	-0.110667	-0.427927	-0.455076	-0.23361	-0.305722	-0.235996	-0.180545	-0.346586	-0.167814	-0.409632	-0.336791	-0.0287593	-0.287572	-0.416466	-0.302907	-0.425852	-0.288189	-0.313241	-0.182275	-0.320759	-0.314364	-0.453332	-0.421235	-0.317981	-0.0382732	-0.129011	-0.296292	-0.57067	-0.403647	-0.136913	-0.288691	-0.121678	-0.269237
SFPQ	-1.39608	-1.43302	-0.997039	-1.19237	-1.71851	-1.29065	-1.4697	-1.54057	-1.29584	-1.4116	-1.18346	-1.12376	-0.735747	-1.27336	-1.41464	-1.38473	-1.29746	-1.34948	-1.30458	-1.5459	-1.29082	-1.39639	-1.52256	-1.69035	-1.49228	-1.55855	-1.48721	-1.57796	-1.6999	-1.30787	-1.3265	-1.3152	-1.27124	-1.26741	-1.52417	-1.71711	-1.21253	-1.31323	-1.32633	-1.49907	-1.33705	-1.40786	-1.51238	-1.25528	-1.92816	-1.43562	-1.37265	-1.60056	-1.38842
SLC25A5	-0.541326	-0.245821	-0.171723	-0.401911	-0.216052	-0.254806	-0.443413	-0.413875	-0.518197	-0.443983	-0.503449	-0.350112	-0.24237	-0.457749	-0.405334	-0.490558	-0.476227	-0.563004	-0.515663	-0.46684	-0.263848	-0.376456	-0.520299	-0.251018	-0.556568	-0.20824	-0.415656	-0.284497	-0.420276	-0.318883	-0.423219	-0.310177	-0.586511	-0.384524	-0.353223	-0.5929	-0.395939	-0.354815	-0.508939	-0.565194	-0.322923	-0.405501	-0.231318	-0.450163	-0.422274	-0.296291	-0.427076	-0.469963	-0.19029
SMARCA4	0.0160536	-0.517429	0.0793893	-0.717354	-0.38916	-0.417044	-0.900061	-0.117457	-0.385215	-0.0438067	-0.125791	-0.0587153	-0.0101357	-0.368756	-0.231839	-0.11078	-0.0458603	-0.0908321	-0.478731	-0.313597	-0.231501	-0.303387	-0.324563	-0.141571	-0.0310665	-0.0268689	-0.0277315	0.13986	-0.185778	-0.079887	-0.188583	0.0238404	-0.444234	-0.268454	-0.733816	0.00740321	-0.519017	-0.0840444	-0.410741	-0.47289	-0.0481447	-0.604074	0.0210461	0.00276324	0.0120318	-0.30709	0.191314	-0.16015	-0.252861
SMARCA5	-0.803886	-0.613089	-0.521821	-0.612614	-0.725764	-0.68142	-0.68931	-0.550275	-0.524477	-0.845517	-0.821893	-0.678105	-0.435342	-0.857045	-0.583036	-0.816439	-0.559151	-0.590532	-0.752141	0.0176045	-0.423371	-0.608535	-0.366947	-0.803932	-0.842649	-0.768896	-0.65588	-0.587837	-0.780656	-0.570315	-0.619796	-0.553814	-0.169116	-0.28944	-0.783604	-0.785072	-0.227063	-1.26892	-0.658354	-0.531939	-0.808051	-0.624757	-0.54578	-0.760004	-1.0239	-1.02224	-0.73737	-0.803349	-0.55084
SND1	-0.0213722	0.00273797	-0.00961208	0.110461	0.216333	0.0239916	0.118845	0.294195	0.253114	0.29621	0.00559444	-0.00207835	0.0957551	0.205584	0.160332	0.115366	0.0374478	0.200373	-0.0655951	-0.203768	-0.00648247	0.172265	0.14886	0.114272	0.0117918	-0.07772	0.0370994	0.0690984	-0.106774	0.173103	0.122094	-0.118634	-0.0334488	0.236014	-0.00806559	0.134323	0.120115	0.0754059	0.189017	0.303167	-0.0024806	0.0713785	-0.104877	0.00970514	0.0618514	0.0478452	0.0769541	0.258702	0.390237
SNRNP200	-2.19216	-2.17122	-2.06206	-1.97711	-2.34416	-2.17586	-2.08443	-2.2331	-2.1056	-1.99837	-1.85987	-1.75218	-2.0214	-2.05956	-1.99531	-2.14366	-2.16627	-1.9839	-2.09325	-2.34103	-2.1161	-2.28512	-2.09584	-2.22602	-2.28739	-2.25416	-2.08451	-1.95055	-1.97099	-1.62835	-2.1242	-2.13303	-2.00284	-2.14373	-2.05952	-1.92504	-2.03869	-1.86922	-2.26439	-2.33976	-2.28511	-2.09588	-2.07413	-2.25274	-2.47012	-2.2866	-2.08858	-2.09805	-2.34726
SNRPD1	-1.9931	-1.91238	-2.13533	-1.78828	-1.96891	-2.14836	-1.85199	-2.08983	-1.77641	-2.04667	-1.75399	-1.75369	-1.89896	-1.98044	-1.71961	-1.89847	-1.87018	-1.76331	-1.83625	-1.9829	-1.96585	-2.16329	-1.97026	-2.05355	-1.92946	-2.01933	-1.87727	-1.88776	-1.73597	-1.96392	-2.00066	-2.22863	-2.2914	-2.04997	-2.20724	-2.35203	-2.06615	-2.01192	-1.98095	-2.07493	-2.10342	-2.08881	-1.77936	-2.22555	-2.15067	-1.8222	-2.06999	-1.72478	-1.70972
SNRPD2	-1.9198	-1.68414	-1.93441	-1.64033	-1.80318	-1.54166	-1.65054	-1.72202	-1.73535	-1.70267	-1.80001	-1.28086	-1.89759	-1.72292	-1.7178	-1.78942	-1.78229	-1.75097	-1.74184	-1.81183	-1.50892	-1.66712	-1.72577	-1.8603	-1.78345	-1.6966	-1.58406	-1.70282	-1.28689	-1.23947	-2.01082	-1.92049	-1.78933	-1.86088	-1.70794	-1.79877	-1.64584	-1.45558	-1.91818	-1.80027	-1.83048	-1.69433	-1.46211	-1.56448	-1.65928	-1.44474	-1.55268	-1.31522	-1.74805
SNW1	-1.2995	-1.80867	-1.44718	-1.39763	-1.53702	-1.71323	-1.45167	-1.65614	-1.58868	-1.54238	-1.63359	-1.1654	-1.30976	-1.44775	-1.55442	-1.59152	-1.2147	-1.54186	-1.44665	-1.44147	-1.28834	-1.53308	-1.38577	-1.14108	-1.12929	-1.22179	-1.41991	-1.33185	-1.3634	-1.49069	-1.52238	-1.46081	-1.26864	-1.43684	-1.53456	-1.66381	-1.41799	-1.14005	-1.58304	-1.43627	-1.33066	-1.45699	-1.39171	-1.38489	-1.64514	-1.11261	-1.45578	-1.23855	-1.0748
SON	-0.946441	-1.04297	-0.958366	-0.927908	-1.37009	-0.931213	-0.828119	-1.07897	-0.800336	-1.00873	-0.922181	-0.870941	-0.716773	-1.17889	-0.966606	-0.913817	-0.997289	-1.07873	-1.19433	-1.10159	-1.03114	-0.925466	-1.35336	-1.43494	-1.35851	-1.24569	-1.10975	-1.09867	-1.34331	-0.456726	-1.29003	-1.08161	-1.02086	-1.16863	-1.06234	-1.13218	-1.03653	-0.943464	-1.23734	-1.20656	-1.22403	-1.0239	-1.34841	-1.41647	-1.05514	-0.746408	-1.16351	-0.769779	-1.14667
SRP14	-1.09449	-0.988508	-0.672424	-0.85511	-0.459193	-1.12233	-1.08672	-1.30979	-0.905321	-0.823205	-0.939515	-0.905793	-0.913808	-0.938618	-0.702797	-0.963491	-0.475153	-0.543958	-1.02916	-1.45772	-0.875188	-1.03295	-0.926592	-0.616523	-1.13049	-0.678037	-0.920479	-0.355623	-1.08792	-0.94919	-1.16138	-0.857456	-1.23937	-1.1764	-0.903154	-0.922312	-0.675201	-1.28523	-0.960635	-0.480804	-0.952308	-0.511691	-0.736318	-0.796056	-1.00927	-1.07376	-1.02125	-0.863238	-1.00819
SRPK1	-0.0243191	0.1278	-0.311774	0.0341528	0.0207042	0.115005	0.0992931	-0.0430724	-0.0224181	0.108363	-0.101177	-0.0768802	-0.0532747	-0.0370803	0.128123	0.00997804	0.0208109	-0.0626645	-0.0460511	-0.167661	-0.100593	-0.121744	-0.396921	-0.00226844	-0.288106	0.140329	-0.189688	0.0240632	-0.283921	-0.0709575	-0.0405612	0.0334314	-0.18992	-0.121017	0.105467	0.0557076	0.146562	-0.16323	-0.136455	-0.220857	-0.113754	-0.196106	-0.552532	0.00659932	-0.0772015	0.0373002	-0.173434	-0.112227	-0.103507
SRRM2	-0.621226	-0.291402	-0.401828	-0.318236	-0.534585	-0.421465	-0.309553	-0.0820983	-0.418627	-0.452455	-0.423917	-0.161904	-0.358141	-0.206085	-0.559339	-0.474409	-0.390292	-0.669237	-0.653436	-0.681872	-0.662104	-0.540143	-0.712934	-0.541491	-0.410964	-0.38029	-0.738912	-0.0435515	-0.414582	-0.281051	-0.757247	-0.257148	-0.676146	-0.266137	-0.44861	-0.472284	-0.193937	-0.358975	-0.439414	-0.623232	-0.52892	-0.64946	-0.266962	-0.385945	-0.459414	-0.239894	-0.558269	-0.320097	-0.501011
SRSF1	-1.49454	-1.52275	-0.813818	-1.38063	-1.50698	-1.26836	-1.4524	-1.61356	-1.33711	-1.49462	-1.65505	-1.53614	-1.5374	-1.5206	-1.46108	-1.51672	-1.51175	-1.55723	-1.43356	-1.4645	-1.37864	-1.49264	-1.42731	-1.57596	-1.44592	-1.56816	-1.51982	-1.40417	-1.55905	-1.72495	-1.69171	-1.4988	-1.40152	-1.32958	-1.85998	-1.47433	-1.57968	-1.19599	-1.34	-1.37322	-0.996168	-1.51692	-1.4265	-1.47831	-1.74737	-1.60473	-1.36149	-1.5733	-1.45165
SRSF10	-0.748333	-0.687647	-1.11193	-1.09165	-0.795604	-0.555659	-0.745784	-0.937184	-1.09424	-0.619119	-0.923319	-0.506644	-0.78855	-0.636729	-0.794341	-0.535122	-0.688542	-0.52456	-0.952166	-0.696727	-0.877896	-0.510662	-0.768244	-0.707367	-0.653303	-0.681946	-0.674088	-1.12869	-0.611296	-0.458238	-0.719835	-0.639706	-0.571974	-0.644486	-0.769544	-1.09957	-1.17839	-0.934666	-0.669664	-0.912108	-0.519275	-0.696897	-0.53056	-0.653253	-0.872691	-0.734538	-0.75832	-0.522476	-0.456232
SRSF7	-1.7244	-1.5069	-1.18012	-1.6518	-1.44819	-1.56147	-1.82508	-1.27352	-1.6583	-1.63528	-1.63299	-1.59719	-1.41939	-1.52669	-1.77908	-1.9812	-1.77739	-1.58398	-1.72277	-1.60232	-1.86159	-1.45387	-1.60805	-1.31725	-1.69611	-1.64267	-1.41112	-1.3445	-1.83993	-1.42816	-1.582	-1.71019	-1.5613	-1.52458	-1.61917	-1.58738	-1.53849	-1.71723	-1.69644	-1.87626	-1.39062	-1.59586	-1.52164	-1.59611	-1.58067	-1.3374	-1.53473	-1.79024	-1.92314
SSRP1	-1.28225	-1.27807	-1.44827	-1.35073	-1.22503	-1.22954	-1.30167	-1.10958	-1.33384	-1.36841	-1.30498	-1.6601	-1.1382	-1.31653	-1.2886	-1.22425	-1.40524	-1.35125	-1.28842	-1.47861	-1.21794	-1.33261	-1.28891	-0.918675	-1.22203	-1.23254	-1.3304	-1.19356	-1.61183	-1.33292	-1.45122	-1.35373	-1.04078	-1.59533	-1.17522	-1.35619	-1.51553	-1.23765	-1.28014	-1.42952	-1.24707	-1.49439	-1.55029	-1.31028	-1.24637	-1.44384	-1.69619	-1.4658	-1.41023
STAU1	-0.00122326	-0.0500018	0.0148301	0.0357709	-0.0823408	-0.0642595	-0.195965	0.0462478	-0.144722	0.0739589	-0.0591239	-0.126143	0.0713385	-0.0891843	-0.131718	-0.162503	0.0298549	-0.102626	-0.10805	0.0460526	0.00838288	-0.0503126	0.155286	0.0660108	0.074663	-0.0619401	-0.114981	-0.120567	0.0428841	-0.0499064	-0.152374	-0.0308837	-0.075297	-0.338463	-0.0917438	-0.14563	-0.0313177	-0.162722	-0.0408545	0.103547	-0.00475741	-0.126244	0.0822589	0.103174	0.0533899	0.218651	-0.0873517	0.0213948	0.0536119
STRAP	-1.01074	-0.663229	-0.0752816	-0.976418	-0.558194	-0.75155	-0.633522	-0.821285	-0.689855	-0.832602	-0.494767	-0.227839	-0.957596	-0.550635	-0.719885	-0.872271	-1.12605	-0.807209	-0.881288	-0.928382	-0.804132	-0.687771	-0.807923	-0.821222	-0.379565	-0.760644	-1.00241	-1.02884	-1.19384	-0.41899	-0.780068	-0.945698	-0.111175	-0.37767	-0.327943	-0.86572	-1.03359	-0.671203	-0.600638	-0.72918	-1.31538	-1.19295	-1.02193	-0.617747	-0.906308	-0.799465	-0.616857	-1.05069	-1.05899
SUPT16H	-1.63297	-1.52209	-1.45914	-1.33248	-1.0768	-1.49666	-1.40212	-1.40819	-1.29523	-1.51578	-1.56552	-0.957021	-1.27701	-1.3997	-1.5174	-1.5992	-1.5154	-1.59569	-1.57788	-1.20154	-1.50852	-1.39778	-1.53338	-1.18877	-1.23653	-1.36207	-1.48994	-1.41524	-1.87057	-1.44652	-1.34362	-1.38149	-1.67346	-1.47763	-1.58168	-1.67176	-1.50082	-0.933642	-1.41866	-1.35303	-1.39336	-1.22604	-1.58369	-1.27632	-1.33413	-1.0757	-1.66107	-1.47964	-1.43063
SYNCRIP	-0.330783	-0.287116	-0.31322	-0.202803	-0.543659	-0.284959	-0.106584	-0.649078	-0.113507	-0.475131	-0.466033	0.211441	-0.157824	-0.3317	-0.256692	-0.268375	-0.288845	-0.22586	-0.22055	-1.09734	-0.26836	-0.168432	-0.540371	-0.00859501	-0.369507	-0.262271	-0.240234	-0.0744131	-0.58903	-0.163745	-0.49487	0.37613	0.106546	-0.142656	-0.634904	-0.270688	-0.575464	-0.43432	-0.278641	-0.448736	-0.27876	-0.272417	-0.36122	-0.290801	-0.669316	-0.489844	-0.220762	-0.475913	-0.449934
TAF15	-0.076393	0.0119084	-0.273659	0.0162721	0.109555	-0.0250806	0.139798	-0.025837	0.178937	0.104078	0.111964	0.135926	0.0655424	-0.0763838	0.0383078	0.135336	-0.0875195	-0.0601438	-0.135593	-0.0751298	0.23452	-0.199849	-0.0906829	-0.00458755	0.0630162	-0.205021	0.206789	0.21901	-0.244452	-0.232974	0.0565755	0.120039	-0.261049	0.0479635	0.0825647	0.157795	0.0681312	0.173603	0.103356	0.306317	0.00100542	0.0931535	-0.31454	-0.160746	0.105825	0.10773	-0.0195057	0.0804546	-0.0665638
TARS	-1.57091	-1.58955	-1.36182	-1.39107	-1.56601	-1.30613	-1.69715	-1.64188	-1.4111	-1.46208	-1.53511	-1.63923	-1.51105	-1.63706	-1.45428	-1.55771	-1.58971	-1.57391	-1.37759	-1.44145	-1.55852	-1.61145	-1.40326	-1.32466	-1.38153	-1.41886	-1.57155	-1.44057	-1.40068	-1.22891	-1.78294	-1.4921	-1.72478	-1.5269	-1.44391	-1.45656	-1.70755	-1.53453	-1.54362	-1.45329	-1.56824	-1.55519	-1.25331	-1.5032	-1.52254	-1.55751	-1.50369	-1.61074	-1.49966
TBL3	-1.34022	-1.21653	-1.51248	-1.45895	-1.00033	-0.937772	-1.052	-1.01842	-1.13058	-1.15117	-0.991486	-1.68004	-1.18969	-1.18158	-1.23875	-1.30953	-1.17291	-1.19937	-1.42613	-1.36648	-1.26652	-1.0823	-1.18375	-1.40154	-1.13999	-1.18866	-1.1926	-1.32304	-1.20967	-1.08937	-1.251	-1.45543	-1.43259	-1.2077	-1.10408	-1.37426	-0.962554	-1.25408	-1.35063	-1.1543	-1.36833	-1.14939	-1.29873	-1.32816	-1.00619	-1.01578	-1.22449	-1.24273	-1.23837
TCOF1	-0.823468	-0.318864	-0.86842	-0.573535	-0.858597	-0.773141	-0.656021	-0.88012	-0.526297	-0.608239	-0.23338	-0.305766	-0.659895	-0.834277	-0.795731	-0.846586	-0.91234	-0.205012	-0.571672	-0.730532	-0.501976	-0.706063	-0.724701	-0.80447	-0.458236	-0.60987	-0.163995	-0.619854	-0.347483	-0.934672	-0.822867	-0.324889	-0.620077	-0.733043	-0.708963	-0.693702	-0.793697	-0.635699	-0.850129	-0.221667	-0.722014	-0.653923	-0.691049	-0.524639	-0.449792	-1.0733	-0.567377	-0.328273	-0.390305
TCP1	-1.36861	-1.35825	-1.60981	-1.36639	-1.4996	-1.38745	-1.35268	-0.798727	-1.42232	-1.4249	-1.6162	-1.17115	-1.51983	-1.40516	-1.68823	-1.52796	-1.51339	-1.40268	-1.22785	-1.35674	-1.4463	-1.60987	-1.34037	-1.45939	-0.955379	-1.56228	-1.27165	-1.34542	-1.50526	-1.23818	-1.26782	-1.39244	-1.33643	-1.72135	-1.17126	-1.21533	-1.49635	-1.30476	-1.13101	-1.41492	-1.12644	-1.32716	-1.14178	-1.30619	-1.54178	-1.46718	-1.38567	-1.71639	-1.60772
THRAP3	-0.464083	-0.28362	-0.327546	-0.548605	-0.561786	-0.23651	-0.478795	-0.142752	-0.280513	-0.404914	0.0213422	-0.521076	-0.206067	-0.459547	-0.241186	-0.36396	-0.414786	-0.355742	-0.340339	-0.297653	-0.166995	-0.106906	-0.3404	-0.198504	-0.266642	-0.313938	0.0154584	-0.13934	-0.640698	-0.182318	-0.399013	-0.346148	-0.326028	-0.611467	-0.285706	-0.309239	-0.174158	-0.289514	-0.168163	-0.568165	-0.356821	-0.222103	-0.485656	-0.679908	-0.482545	-0.609012	-0.505433	-0.377984	-0.571364
TOP1	-0.895992	-0.604912	-0.996879	-0.605113	-0.728361	-1.2276	-0.80532	-0.927163	-0.824812	-0.885754	-0.812241	-0.626171	-1.48553	-0.633376	-0.810143	-1.05808	-1.23402	-0.881588	-0.934341	-1.06826	-0.71677	-0.830854	-1.18973	-0.997792	-0.828893	-0.789424	-0.943031	-1.15681	-0.88351	-0.803885	-0.987339	-0.948562	-0.760745	-0.95599	-1.15078	-0.824661	-0.774876	-0.991491	-0.95851	-1.1162	-0.601274	-1.02557	-1.16051	-0.854525	-0.334458	-0.94178	-0.755523	-0.842333	-1.10121
TSR1	-1.40809	-1.28282	-1.42715	-1.15415	-1.39149	-1.24052	-1.41602	-1.34335	-1.24865	-1.24006	-1.56733	-1.35249	-1.13252	-1.39204	-1.40012	-1.50974	-1.30563	-1.19843	-1.3966	-1.2639	-1.28325	-1.30651	-1.31523	-1.25943	-1.27794	-1.2945	-1.17172	-1.28598	-1.24449	-1.29958	-1.1726	-1.25389	-1.34459	-1.4292	-1.39798	-1.46482	-1.23063	-1.16746	-1.3884	-1.32203	-1.62052	-1.40157	-1.1774	-1.5825	-1.09912	-1.12176	-1.41624	-1.33022	-1.27724
U2AF2	-1.1989	-1.52678	-1.29502	-1.35187	-1.62758	-1.22671	-1.4016	-1.54102	-1.54215	-1.31601	-1.56098	-0.989278	-0.615127	-1.22428	-1.44496	-1.46188	-1.383	-1.35178	-1.42152	-1.44016	-1.4059	-1.42123	-1.52444	-1.54536	-1.4834	-1.13303	-1.44796	-1.54714	-1.59905	-1.38663	-1.39813	-1.54757	-1.26586	-1.57781	-1.34945	-1.45192	-1.57245	-1.5546	-1.39165	-1.2923	-1.47628	-1.48846	-1.61581	-1.14675	-1.49925	-0.965722	-1.53212	-1.45321	-1.4006
U2SURP	-1.18543	-1.09484	-1.03789	-1.14918	-1.22713	-1.07387	-1.1897	-1.04968	-0.972746	-1.19544	-0.859955	-1.60128	-0.88315	-0.974927	-1.41014	-1.22562	-1.31679	-1.33599	-1.1575	-0.932764	-1.15941	-1.35428	-1.15622	-1.34864	-1.07279	-0.961635	-0.850131	-0.904805	-0.932879	-1.28004	-1.09947	-1.20891	-1.2063	-0.935983	-1.13904	-1.18033	-1.37066	-0.705601	-1.00538	-1.03981	-0.741196	-1.13421	-1.51052	-1.03756	-0.881782	-0.853996	-1.10427	-1.29165	-1.41208
UPF1	-1.26882	-1.17835	-1.85701	-1.29909	-1.50238	-1.04058	-1.5142	-1.36721	-1.3827	-1.38713	-1.06577	-1.57432	-1.07201	-1.13126	-1.04104	-1.18226	-1.3596	-1.35498	-1.18211	-1.20457	-1.33348	-1.33347	-1.40213	-1.25881	-1.20579	-1.35639	-1.34886	-1.56852	-1.57831	-1.5439	-1.35104	-1.48808	-1.10509	-1.34106	-1.36379	-1.47981	-1.20601	-1.28459	-1.19083	-1.17846	-1.22675	-1.29199	-1.40096	-1.27805	-1.16647	-1.03941	-1.6392	-1.29745	-1.35913
USP10	-0.739535	-0.619478	-0.828681	-0.42357	-0.675475	-0.94597	-0.502072	-0.335102	-0.559615	-0.574525	-0.458496	-0.581507	-0.293803	-0.692064	-0.739945	-0.730823	-0.63386	-0.626959	-0.959999	-0.84669	-0.690526	-0.675226	-0.847498	-0.331502	-0.834196	-0.455762	-0.75866	-0.817803	-0.311044	-0.217666	-0.554155	-0.701351	-0.25564	-0.584295	-0.606401	-0.701392	-0.74035	-0.642709	-0.677358	-0.58458	-0.268368	-0.651555	-0.832112	-0.805865	-0.578465	-0.676273	-0.641919	-0.43862	-0.573855
UTP14A	-0.581655	-0.599281	-0.531104	-0.471785	-0.608785	-0.289304	-0.67459	-0.399422	-0.502664	-0.512065	-0.132566	-0.274259	-0.456695	-0.53737	-0.505798	-0.489592	-0.584798	-0.561808	-0.599903	-0.555194	-0.448251	-0.599129	-0.554655	-0.565534	-0.132745	-0.286368	-0.090268	-0.621141	-0.488372	-0.34441	-0.343755	-0.384359	-0.43464	-0.507316	-0.472164	-0.144716	-0.235855	-0.408196	-0.541872	-0.614876	-0.471573	-0.483875	-0.840953	-0.434481	-0.477574	-0.550434	-0.288045	-0.66462	-0.451888
VARS	-1.42255	-1.69769	-1.40722	-1.68592	-1.32637	-1.40636	-1.6985	-1.60214	-1.46027	-1.56783	-1.57422	-1.68007	-1.66647	-1.70012	-1.58447	-1.48732	-1.41221	-1.81636	-1.59865	-1.50024	-1.47226	-1.35925	-1.30075	-1.53603	-1.41232	-1.1643	-1.44989	-1.12321	-1.60909	-1.37882	-0.911681	-1.44255	-1.37052	-1.70163	-1.36806	-1.69301	-1.50654	-1.68185	-1.66124	-1.23002	-1.44426	-1.43378	-1.16343	-1.60844	-1.50382	-1.35671	-1.37491	-1.54974	-1.05914
VDAC2	-0.0993085	0.000624335	0.0590483	-0.0533814	-0.0209187	-0.146632	-0.0920869	0.0357574	-0.044897	-0.131878	-0.0421841	0.0665588	-0.170196	-0.251488	0.0113613	-0.139929	-0.0370424	-0.0644859	-0.216617	-0.116838	-0.296525	-0.318148	-0.499473	-0.0126783	0.115614	0.000101564	0.178998	-0.29604	-0.0417241	-0.0899366	-0.0926327	0.021917	-0.117041	-0.0393673	-0.110223	-0.111061	-0.443148	-0.0956772	0.0275122	-0.0953594	-0.00927103	-0.0789666	-0.274296	-0.276937	-0.0166814	-0.118675	-0.197458	-0.05776	-0.133161
WDR3	-1.24795	-1.42726	-1.34259	-1.41489	-1.07194	-0.945021	-1.17211	-1.12713	-1.22287	-1.05402	-1.04657	-0.889177	-1.40343	-1.01748	-1.28088	-1.15595	-1.06817	-1.19315	-1.2642	-1.29473	-1.00073	-1.20099	-1.24627	-1.11505	-1.09818	-1.17686	-1.14361	-0.964222	-0.820778	-0.87758	-1.22491	-1.23681	-1.15011	-1.21097	-1.29433	-1.25716	-1.13468	-1.36331	-1.15324	-1.33905	-0.827829	-1.11188	-1.37695	-1.53492	-1.0591	-1.23725	-1.28171	-1.36342	-1.307
WDR36	-0.403848	-0.414476	-0.514797	-0.567715	-0.536705	-0.237241	-0.410104	-0.874509	-0.493812	-0.784493	-0.293296	-0.3555	-0.446281	-0.506804	-0.704642	-0.638089	-0.88397	-0.811549	-0.658505	-0.713399	-0.553933	-0.608892	-0.645032	-0.679241	-0.353001	-0.859441	-0.503605	-0.566428	-0.751987	-0.455137	-0.436071	-0.6866	-0.506467	-0.659384	-0.483873	-0.653941	-0.686854	-0.704836	-0.581452	-0.426223	-0.873618	-0.556401	-0.586962	-0.707653	-0.664625	-0.659457	-0.600447	-0.523289	-0.601294
XRN2	-1.03978	-1.012	-1.08187	-0.675764	-1.24731	-0.988302	-1.16753	-1.13224	-1.01911	-1.32858	-1.22477	-0.894501	-1.35575	-1.33332	-1.06447	-1.22393	-1.16421	-0.939326	-1.27295	-0.908894	-1.24657	-1.16468	-1.14791	-1.02406	-1.27573	-1.0408	-0.838354	-0.950029	-1.08131	-0.769827	-1.10015	-0.967125	-0.955544	-1.26524	-0.918991	-1.08411	-0.836185	-1.19424	-1.06485	-1.139	-1.13401	-1.26078	-0.947602	-1.07366	-0.728952	-0.657455	-1.18592	-1.09443	-1.15207
YBX1	-0.856481	-1.15289	-0.95513	-1.32172	-1.26259	-1.25958	-0.941871	-0.833719	-1.20765	-0.939587	-0.892763	-1.76559	-0.923704	-0.822012	-0.884031	-0.870761	-0.827242	-0.841769	-0.967631	-1.06092	-0.91101	-1.01047	-0.781267	-1.00326	-1.08294	-0.827595	-0.957223	-1.21303	-0.738241	-0.917013	-0.983219	-0.823293	-0.808919	-1.09235	-0.851749	-0.649757	-1.42753	-0.987989	-1.14454	-1.00339	-1.19706	-1.03506	-1.04225	-1.05986	-0.654744	-1.14264	-0.628611	-1.15353	-1.18556
ZC3H11A	-0.353144	-0.303759	-0.139371	-0.32894	-0.352684	-0.369214	-0.130208	-0.370965	0.042883	-0.265662	-0.140659	-0.0858022	-0.329365	-0.167019	-0.179237	-0.240167	-0.216264	-0.271307	-0.312337	-0.356154	0.0211031	-0.305029	-0.366966	-0.0174811	-0.403519	-0.056902	-0.16406	-0.18937	-0.528522	-0.136395	-0.365381	-0.119312	-0.585933	-0.093653	-0.405995	-0.422925	-0.240002	-0.256745	-0.330657	-0.344198	-0.488151	-0.318549	-0.228477	-0.29105	-0.307864	-0.102248	-0.36092	-0.206532	-0.30504
ZC3H15	-0.248813	-0.0093707	0.13038	-0.0228231	-0.27977	-0.0585649	-0.0466526	-0.0836223	0.0807863	-0.119084	-0.266228	-0.0130443	-0.0795926	-0.0251376	-0.0592921	-0.129566	-0.153605	-0.0449189	-0.0444893	-0.0319822	0.0398815	-0.445671	0.112287	-0.240398	-0.243077	0.0607669	-0.276378	0.0355137	-0.178432	-0.290485	-0.0413634	0.0529813	0.161241	-0.18826	-0.054997	0.0295221	-0.0991637	0.175859	-0.0207678	-0.120329	-0.0110637	0.0930076	-0.0286745	0.0431242	-0.0220071	0.155672	-0.102482	0.0699095	-0.245952
ZC3HAV1	-0.225202	-0.110548	-0.0611978	-0.19234	-0.137572	-0.222483	-0.214323	0.0762914	-0.0790124	-0.239999	-0.131261	-0.151554	0.185476	-0.0935003	-0.320429	-0.0205064	-0.0896725	-0.0385936	-0.253443	-0.173518	-0.349964	-0.081588	-0.101344	-0.0112922	-0.391367	0.0033623	-0.170558	0.0330571	-0.152168	-0.0554392	-0.0664146	-0.331784	-0.0509503	0.0554121	-0.12314	-0.0481558	-0.0862711	-0.283669	-0.0781999	-0.137185	-0.232771	-0.176765	-0.142108	-0.0717572	-0.149413	-0.130025	-0.176363	-0.160574	-0.161289
ZFR	-0.299419	-0.428926	-0.360555	-0.313266	-0.260915	-0.286405	-0.511386	-0.337368	-0.0786878	-0.296333	-0.309493	-0.192726	-0.125113	-0.0998558	-0.620419	-0.424089	-0.329617	-0.422393	-0.439694	-0.139615	-0.423228	-0.430749	-0.443531	-0.388003	-0.00595613	-0.306871	-0.299413	0.0534488	-0.55044	-0.178821	-0.441267	-0.238417	-0.315432	-0.412972	-0.457169	-0.179932	-0.0479922	-0.390023	-0.125048	-0.151569	-0.0388681	-0.426856	0.00108692	-0.396699	-0.50581	-0.223906	-0.402864	-0.151745	-0.765107
ZNF207	-1.21531	-1.06028	-1.28307	-1.07021	-1.00371	-1.0555	-1.09575	-0.939558	-1.203	-0.997364	-0.904357	-0.3723	-1.09235	-1.16521	-1.09794	-0.997512	-1.02053	-0.909661	-0.935436	-1.01104	-0.974789	-1.28662	-0.881011	-0.840174	-0.911244	-1.08701	-0.944232	-1.04346	-1.09306	-1.14078	-1.06844	-1.1513	-1.02849	-0.770572	-1.22095	-1.25932	-1.24785	-0.852804	-1.08723	-0.993614	-0.925404	-0.798323	-0.671497	-0.899223	-1.49245	-1.15409	-1.05464	-1.01377	-1.12867
[truncated: 4 more columns]

## Sheet: Table S5b
DAM pan-cancer core fitness genes	type1	type2	type5	type3	type4
AAMP	DAM pan-cancer core fitness	NA	NA	NA	NA
AARS	NA	Hart 2017	NA	NA	NA
ABCB7	DAM pan-cancer core fitness	NA	NA	NA	NA
ABCE1	DAM pan-cancer core fitness	Hart 2017	NA	NA	NA
ABCF1	NA	Hart 2017	Achilles	204 hybrid genes	NA
ACIN1	NA	NA	NA	204 hybrid genes	NA
ACTB	NA	Hart 2017	NA	NA	NA
ACTL6A	NA	Hart 2017	NA	NA	NA
ACTR10	DAM pan-cancer core fitness	Hart 2017	NA	NA	NA
ACTR2	DAM pan-cancer core fitness	Hart 2017	NA	NA	NA
ADSL	NA	Hart 2017	NA	NA	NA
ADSS	NA	Hart 2017	NA	NA	NA
AFG3L2	DAM pan-cancer core fitness	NA	NA	NA	NA
AHCY	NA	Hart 2017	NA	NA	NA
ALG1	NA	Hart 2017	NA	NA	NA
ALG11	DAM pan-cancer core fitness	NA	NA	NA	NA
ALG14	NA	Hart 2017	NA	NA	NA
ALG1L	DAM pan-cancer core fitness	NA	NA	NA	NA
ALG2	NA	Hart 2017	NA	NA	NA
ALYREF	DAM pan-cancer core fitness	NA	NA	204 hybrid genes	NA
ANAPC1	DAM pan-cancer core fitness	NA	NA	NA	NA
ANAPC2	DAM pan-cancer core fitness	Hart 2017	NA	NA	NA
ANAPC4	DAM pan-cancer core fitness	Hart 2017	NA	NA	NA
ANAPC5	DAM pan-cancer core fitness	Hart 2017	NA	NA	NA
ANKLE2	DAM pan-cancer core fitness	NA	NA	NA	NA
APOBEC3C	NA	NA	NA	204 hybrid genes	NA
AQR	DAM pan-cancer core fitness	Hart 2017	Achilles	204 hybrid genes	NA
ARCN1	DAM pan-cancer core fitness	Hart 2017	NA	NA	NA
ARIH1	NA	Hart 2017	NA	NA	NA
ARL2	DAM pan-cancer core fitness	Hart 2017	NA	NA	NA
ATP2A2	DAM pan-cancer core fitness	Hart 2017	NA	NA	NA
ATP5A1	NA	Hart 2017	NA	NA	NA
ATP5B	NA	Hart 2017	NA	NA	NA
ATP5C1	NA	Hart 2017	NA	NA	NA
ATP5D	NA	Hart 2017	NA	NA	NA
ATP5J2-PTCD1	NA	Hart 2017	NA	NA	NA
ATP5L	NA	Hart 2017	NA	NA	NA
ATP5O	NA	Hart 2017	NA	NA	NA
ATP6V0B	NA	Hart 2017	NA	NA	NA
ATP6V0C	DAM pan-cancer core fitness	Hart 2017	NA	NA	NA
ATP6V0D1	DAM pan-cancer core fitness	NA	NA	NA	NA
ATP6V1A	DAM pan-cancer core fitness	Hart 2017	NA	NA	NA
ATP6V1B2	DAM pan-cancer core fitness	NA	NA	NA	NA
ATP6V1D	NA	Hart 2017	NA	NA	NA
ATP6V1E1	DAM pan-cancer core fitness	Hart 2017	NA	NA	NA
ATR	NA	Hart 2017	NA	NA	NA
AURKB	DAM pan-cancer core fitness	Hart 2017	NA	NA	NA
BANF1	DAM pan-cancer core fitness	Hart 2017	NA	NA	NA
BCAS2	DAM pan-cancer core fitness	NA	NA	NA	NA
BCL2L2-PABPN1	DAM pan-cancer core fitness	NA	NA	NA	NA
BIRC5	DAM pan-cancer core fitness	Hart 2017	NA	NA	NA
BRF1	DAM pan-cancer core fitness	NA	NA	NA	NA
BRF2	DAM pan-cancer core fitness	NA	NA	NA	NA
BRIX1	DAM pan-cancer core fitness	NA	NA	NA	NA
BUB1B	NA	Hart 2017	NA	NA	NA
BUB3	DAM pan-cancer core fitness	Hart 2017	Achilles	204 hybrid genes	NA
BUD31	NA	Hart 2017	NA	NA	NA
BYSL	NA	Hart 2017	NA	NA	NA
C10orf2	NA	Hart 2017	NA	NA	NA
C14orf166	NA	NA	NA	204 hybrid genes	NA
C1orf109	NA	Hart 2017	NA	NA	NA
C21orf59	DAM pan-cancer core fitness	Hart 2017	NA	NA	NA
C3orf17	NA	Hart 2017	NA	NA	NA
C9orf114	DAM pan-cancer core fitness	Hart 2017	NA	NA	NA
CACTIN	DAM pan-cancer core fitness	NA	NA	NA	NA
CARS	DAM pan-cancer core fitness	NA	NA	NA	NA
CBWD1	DAM pan-cancer core fitness	NA	NA	NA	NA
CCDC84	NA	Hart 2017	NA	NA	NA
CCDC94	DAM pan-cancer core fitness	Hart 2017	NA	NA	NA
CCNA2	NA	Hart 2017	NA	NA	NA
CCNH	NA	Hart 2017	NA	NA	NA
CCNK	DAM pan-cancer core fitness	Hart 2017	NA	NA	NA
CCT2	DAM pan-cancer core fitness	Hart 2017	NA	NA	NA
CCT3	DAM pan-cancer core fitness	Hart 2017	Achilles	204 hybrid genes	NA
CCT4	NA	Hart 2017	Achilles	204 hybrid genes	NA
CCT5	DAM pan-cancer core fitness	Hart 2017	NA	NA	NA
CCT6A	DAM pan-cancer core fitness	Hart 2017	NA	204 hybrid genes	NA
CCT7	DAM pan-cancer core fitness	Hart 2017	NA	NA	NA
CCT8	DAM pan-cancer core fitness	Hart 2017	Achilles	204 hybrid genes	NA
CDC123	DAM pan-cancer core fitness	Hart 2017	NA	NA	NA
CDC16	DAM pan-cancer core fitness	Hart 2017	NA	NA	NA
CDC20	DAM pan-cancer core fitness	Hart 2017	NA	NA	NA
CDC23	DAM pan-cancer core fitness	NA	NA	NA	NA
CDC27	DAM pan-cancer core fitness	Hart 2017	NA	NA	NA
CDC37	NA	Hart 2017	NA	NA	NA
CDC45	DAM pan-cancer core fitness	NA	NA	NA	NA
CDC5L	DAM pan-cancer core fitness	Hart 2017	Achilles	204 hybrid genes	NA
CDC6	DAM pan-cancer core fitness	NA	NA	NA	NA
CDC7	DAM pan-cancer core fitness	NA	NA	NA	NA
CDC73	DAM pan-cancer core fitness	Hart 2017	NA	NA	NA
CDK1	DAM pan-cancer core fitness	Hart 2017	NA	NA	NA
CDK11A	DAM pan-cancer core fitness	NA	NA	NA	NA
CDK7	NA	Hart 2017	NA	NA	NA
CDK9	DAM pan-cancer core fitness	Hart 2017	NA	NA	NA
CDT1	DAM pan-cancer core fitness	Hart 2017	NA	NA	NA
CEBPZ	NA	Hart 2017	NA	NA	NA
CENPA	NA	Hart 2017	NA	NA	NA
CENPC	DAM pan-cancer core fitness	Hart 2017	NA	NA	NA
CENPK	DAM pan-cancer core fitness	NA	NA	NA	NA
CENPM	DAM pan-cancer core fitness	NA	NA	NA	NA
CENPN	DAM pan-cancer core fitness	NA	NA	NA	NA
CENPW	DAM pan-cancer core fitness	NA	NA	NA	NA
CFL1	NA	Hart 2017	NA	NA	NA
CHAF1A	NA	Hart 2017	NA	NA	NA
CHAF1B	DAM pan-cancer core fitness	Hart 2017	NA	NA	NA
CHEK1	DAM pan-cancer core fitness	Hart 2017	NA	NA	NA
CHERP	NA	Hart 2017	NA	NA	NA
CHMP2A	DAM pan-cancer core fitness	Hart 2017	NA	NA	NA
CHMP6	NA	Hart 2017	NA	NA	NA
CIAO1	NA	Hart 2017	NA	NA	NA
CINP	NA	Hart 2017	NA	NA	NA
CIRH1A	NA	Hart 2017	NA	NA	NA
CKAP5	DAM pan-cancer core fitness	Hart 2017	NA	NA	NA
CLNS1A	NA	Hart 2017	NA	NA	NA
CLP1	DAM pan-cancer core fitness	Hart 2017	NA	NA	NA
CLTC	NA	Hart 2017	Achilles	204 hybrid genes	NA
CMAS	NA	NA	NA	204 hybrid genes	NA
CMPK1	NA	Hart 2017	NA	NA	NA
CMTR1	NA	Hart 2017	NA	NA	NA
CNOT3	NA	Hart 2017	NA	NA	NA
COA5	NA	Hart 2017	NA	NA	NA
COPA	DAM pan-cancer core fitness	Hart 2017	NA	NA	NA
COPB1	DAM pan-cancer core fitness	Hart 2017	NA	NA	NA
COPB2	DAM pan-cancer core fitness	Hart 2017	NA	NA	NA
COPS2	DAM pan-cancer core fitness	NA	NA	NA	NA
COPS3	NA	Hart 2017	NA	NA	NA
COPS5	DAM pan-cancer core fitness	NA	NA	NA	NA
COPS6	NA	Hart 2017	NA	NA	NA
COPZ1	DAM pan-cancer core fitness	Hart 2017	NA	NA	NA
COQ4	NA	Hart 2017	NA	NA	NA
CORO1A	NA	NA	NA	204 hybrid genes	NA
COX10	NA	Hart 2017	NA	NA	NA
COX11	NA	Hart 2017	NA	NA	NA
COX15	NA	Hart 2017	NA	NA	NA
COX4I1	NA	Hart 2017	NA	NA	NA
COX5B	NA	Hart 2017	NA	NA	NA
COX6B1	NA	Hart 2017	NA	NA	NA
CPSF1	NA	Hart 2017	NA	NA	NA
CPSF2	DAM pan-cancer core fitness	Hart 2017	NA	NA	NA
CPSF3	DAM pan-cancer core fitness	Hart 2017	NA	NA	NA
CPSF3L	DAM pan-cancer core fitness	NA	NA	NA	NA
CPSF4	NA	Hart 2017	NA	NA	NA
CRNKL1	DAM pan-cancer core fitness	Hart 2017	NA	NA	NA
CSE1L	DAM pan-cancer core fitness	Hart 2017	NA	NA	NA
CSTF3	DAM pan-cancer core fitness	NA	NA	NA	NA
CTCF	DAM pan-cancer core fitness	NA	NA	NA	NA
CTDP1	DAM pan-cancer core fitness	Hart 2017	NA	NA	NA
CTPS1	NA	Hart 2017	NA	NA	NA
CTR9	NA	Hart 2017	NA	NA	NA
CWC22	DAM pan-cancer core fitness	NA	NA	NA	NA
CYCS	NA	Hart 2017	NA	NA	NA
DAD1	DAM pan-cancer core fitness	Hart 2017	NA	NA	NA
DARS	DAM pan-cancer core fitness	NA	Achilles	204 hybrid genes	NA
DBR1	DAM pan-cancer core fitness	Hart 2017	NA	NA	NA
DCTN5	NA	Hart 2017	NA	NA	NA
DDB1	DAM pan-cancer core fitness	Hart 2017	Achilles	204 hybrid genes	NA
DDOST	NA	Hart 2017	NA	NA	NA
DDX1	NA	NA	NA	204 hybrid genes	NA
DDX10	DAM pan-cancer core fitness	Hart 2017	NA	NA	NA
DDX17	NA	NA	NA	204 hybrid genes	NA
DDX18	DAM pan-cancer core fitness	Hart 2017	Achilles	204 hybrid genes	42 tumor associated genes
DDX20	NA	Hart 2017	NA	NA	NA
DDX21	NA	Hart 2017	NA	204 hybrid genes	42 tumor associated genes
DDX23	NA	NA	NA	204 hybrid genes	NA
DDX27	NA	Hart 2017	NA	NA	NA
DDX3X	NA	NA	Achilles	204 hybrid genes	NA
DDX41	NA	Hart 2017	Achilles	204 hybrid genes	NA
DDX46	NA	NA	NA	204 hybrid genes	NA
DDX47	DAM pan-cancer core fitness	Hart 2017	NA	NA	NA
DDX49	NA	Hart 2017	NA	NA	NA
DDX5	NA	NA	NA	204 hybrid genes	NA
DDX54	DAM pan-cancer core fitness	NA	NA	NA	NA
DDX55	NA	Hart 2017	NA	NA	NA
DDX56	DAM pan-cancer core fitness	Hart 2017	NA	NA	NA
DDX6	NA	NA	NA	204 hybrid genes	NA
DGCR8	NA	Hart 2017	NA	NA	NA
DHDDS	DAM pan-cancer core fitness	NA	NA	NA	NA
DHFRL1	DAM pan-cancer core fitness	NA	NA	NA	NA
DHODH	NA	Hart 2017	NA	NA	NA
DHPS	NA	Hart 2017	NA	NA	NA
DHX15	DAM pan-cancer core fitness	Hart 2017	Achilles	204 hybrid genes	NA
DHX16	DAM pan-cancer core fitness	NA	NA	NA	NA
DHX30	NA	NA	NA	204 hybrid genes	NA
DHX33	NA	Hart 2017	NA	NA	NA
DHX36	NA	NA	NA	204 hybrid genes	NA
DHX37	DAM pan-cancer core fitness	Hart 2017	NA	NA	NA
DHX8	DAM pan-cancer core fitness	Hart 2017	NA	NA	NA
DHX9	DAM pan-cancer core fitness	Hart 2017	Achilles	204 hybrid genes	NA
DIEXF	NA	Hart 2017	NA	NA	NA
DIMT1	NA	Hart 2017	NA	NA	NA
DIS3	NA	Hart 2017	NA	NA	NA
DKC1	NA	Hart 2017	Achilles	204 hybrid genes	42 tumor associated genes
DLST	NA	Hart 2017	NA	NA	NA
DMAP1	NA	Hart 2017	NA	NA	NA
DNAJA3	NA	Hart 2017	NA	204 hybrid genes	NA
DNAJC9	NA	Hart 2017	NA	NA	NA
DNM2	NA	Hart 2017	NA	NA	NA
DNMT1	NA	Hart 2017	NA	204 hybrid genes	NA
DOLK	NA	Hart 2017	NA	NA	NA
DONSON	NA	Hart 2017	NA	NA	NA
DPAGT1	NA	Hart 2017	NA	NA	NA
DTL	DAM pan-cancer core fitness	Hart 2017	NA	NA	NA
DTYMK	DAM pan-cancer core fitness	Hart 2017	NA	NA	NA
DUT	DAM pan-cancer core fitness	NA	NA	NA	NA
DYNC1H1	DAM pan-cancer core fitness	NA	NA	NA	NA
DYNC1I2	DAM pan-cancer core fitness	Hart 2017	NA	NA	NA
ECD	DAM pan-cancer core fitness	Hart 2017	NA	NA	NA
EEF1A1	DAM pan-cancer core fitness	NA	Achilles	204 hybrid genes	NA
EEF1G	NA	NA	NA	204 hybrid genes	NA
EEF2	DAM pan-cancer core fitness	Hart 2017	Achilles	204 hybrid genes	NA
EFTUD2	DAM pan-cancer core fitness	Hart 2017	NA	NA	NA
EIF1	DAM pan-cancer core fitness	NA	NA	NA	NA
EIF1AX	DAM pan-cancer core fitness	NA	NA	NA	NA
EIF2AK2	NA	NA	NA	204 hybrid genes	NA
EIF2B1	NA	Hart 2017	NA	NA	NA
EIF2B2	DAM pan-cancer core fitness	NA	NA	NA	NA
EIF2B3	DAM pan-cancer core fitness	Hart 2017	NA	NA	NA
EIF2B4	DAM pan-cancer core fitness	NA	NA	NA	NA
EIF2B5	DAM pan-cancer core fitness	Hart 2017	NA	NA	NA
EIF2S1	DAM pan-cancer core fitness	Hart 2017	Achilles	204 hybrid genes	NA
EIF2S2	DAM pan-cancer core fitness	Hart 2017	NA	NA	NA
EIF2S3	DAM pan-cancer core fitness	Hart 2017	Achilles	204 hybrid genes	NA
EIF3A	DAM pan-cancer core fitness	Hart 2017	NA	NA	NA
EIF3B	DAM pan-cancer core fitness	Hart 2017	NA	NA	NA
EIF3C	NA	Hart 2017	NA	NA	NA
EIF3D	DAM pan-cancer core fitness	Hart 2017	Achilles	204 hybrid genes	NA
EIF3F	DAM pan-cancer core fitness	NA	Achilles	204 hybrid genes	NA
EIF3G	NA	Hart 2017	NA	NA	NA
EIF3I	DAM pan-cancer core fitness	Hart 2017	NA	NA	NA
EIF4A1	NA	NA	Achilles	204 hybrid genes	42 tumor associated genes
EIF4A3	DAM pan-cancer core fitness	Hart 2017	NA	NA	NA
EIF4E	DAM pan-cancer core fitness	NA	NA	NA	NA
EIF5	DAM pan-cancer core fitness	NA	NA	NA	NA
EIF5A	NA	Hart 2017	Achilles	204 hybrid genes	NA
EIF5B	NA	Hart 2017	NA	204 hybrid genes	NA
EIF6	NA	Hart 2017	NA	NA	NA
ELAC2	NA	Hart 2017	NA	NA	NA
ELAVL1	NA	NA	NA	204 hybrid genes	NA
ELL	DAM pan-cancer core fitness	Hart 2017	NA	NA	NA
EMG1	NA	NA	NA	204 hybrid genes	42 tumor associated genes
ENO1	NA	NA	NA	204 hybrid genes	NA
EPRS	DAM pan-cancer core fitness	Hart 2017	NA	NA	NA
ERCC2	NA	Hart 2017	NA	NA	NA
ERCC3	DAM pan-cancer core fitness	Hart 2017	NA	NA	NA
ERH	DAM pan-cancer core fitness	Hart 2017	NA	NA	NA
ESPL1	DAM pan-cancer core fitness	NA	NA	NA	NA
EXOSC2	NA	Hart 2017	NA	NA	NA
EXOSC3	DAM pan-cancer core fitness	Hart 2017	NA	NA	NA
EXOSC4	NA	Hart 2017	NA	NA	NA
EXOSC6	NA	Hart 2017	NA	NA	NA
EXOSC7	DAM pan-cancer core fitness	Hart 2017	NA	NA	NA
EXOSC8	NA	Hart 2017	NA	NA	NA
EZR	NA	NA	NA	204 hybrid genes	NA
FAM86B1	DAM pan-cancer core fitness	NA	NA	NA	NA
FAM96B	NA	Hart 2017	NA	NA	NA
FAM98A	NA	NA	NA	204 hybrid genes	NA
FARS2	NA	Hart 2017	NA	NA	NA
FARSA	DAM pan-cancer core fitness	Hart 2017	NA	NA	NA
FARSB	DAM pan-cancer core fitness	Hart 2017	NA	NA	NA
FAU	NA	Hart 2017	NA	NA	NA
FBL	NA	NA	Achilles	204 hybrid genes	42 tumor associated genes
FBXO5	DAM pan-cancer core fitness	NA	NA	NA	NA
FCF1	DAM pan-cancer core fitness	NA	NA	NA	NA
FIP1L1	NA	NA	NA	204 hybrid genes	NA
FNTA	NA	Hart 2017	NA	NA	NA
FNTB	NA	Hart 2017	NA	NA	NA
FRG1	NA	NA	NA	204 hybrid genes	NA
FTSJ3	NA	Hart 2017	NA	NA	NA
FUS	NA	NA	NA	204 hybrid genes	NA
FXR1	NA	NA	NA	204 hybrid genes	NA
G3BP2	NA	NA	NA	204 hybrid genes	NA
GABPA	NA	Hart 2017	NA	NA	NA
GAPDH	NA	Hart 2017	NA	NA	NA
GARS	DAM pan-cancer core fitness	NA	NA	NA	NA
GART	NA	Hart 2017	NA	NA	NA
GBF1	DAM pan-cancer core fitness	NA	NA	NA	NA
GEMIN5	NA	Hart 2017	NA	NA	NA
GEMIN8	NA	Hart 2017	NA	NA	NA
GFM1	NA	Hart 2017	NA	NA	NA
GGPS1	NA	Hart 2017	NA	NA	NA
GINS1	DAM pan-cancer core fitness	NA	NA	NA	NA
GINS2	DAM pan-cancer core fitness	Hart 2017	NA	NA	NA
GINS3	NA	Hart 2017	NA	NA	NA
GINS4	NA	Hart 2017	NA	NA	NA
GMPPB	NA	Hart 2017	NA	NA	NA
GMPS	NA	Hart 2017	NA	NA	NA
GNB2L1	DAM pan-cancer core fitness	Hart 2017	NA	204 hybrid genes	NA
GNL3	DAM pan-cancer core fitness	Hart 2017	Achilles	204 hybrid genes	42 tumor associated genes
GPN1	DAM pan-cancer core fitness	NA	NA	NA	NA
GPN2	DAM pan-cancer core fitness	NA	NA	NA	NA
GPN3	NA	Hart 2017	NA	NA	NA
GPS1	NA	Hart 2017	NA	NA	NA
GRPEL1	DAM pan-cancer core fitness	Hart 2017	NA	NA	NA
GRWD1	NA	Hart 2017	NA	NA	NA
GSPT1	DAM pan-cancer core fitness	Hart 2017	NA	NA	NA
GTF2A2	DAM pan-cancer core fitness	NA	NA	NA	NA
GTF2B	DAM pan-cancer core fitness	Hart 2017	NA	NA	NA
GTF2E1	DAM pan-cancer core fitness	NA	NA	NA	NA
GTF2E2	DAM pan-cancer core fitness	NA	NA	NA	NA
GTF2H1	NA	Hart 2017	NA	NA	NA
GTF2H2C	NA	Hart 2017	NA	NA	NA
GTF2H4	NA	Hart 2017	NA	NA	NA
GTF3A	NA	Hart 2017	NA	NA	NA
GTF3C1	NA	Hart 2017	NA	NA	NA
GTF3C2	NA	Hart 2017	NA	NA	NA
GTF3C5	NA	Hart 2017	NA	NA	NA
GTPBP4	DAM pan-cancer core fitness	Hart 2017	Achilles	204 hybrid genes	42 tumor associated genes
GUK1	NA	Hart 2017	NA	NA	NA
HARS	NA	Hart 2017	NA	NA	NA
HAUS1	DAM pan-cancer core fitness	Hart 2017	NA	NA	NA
HAUS3	DAM pan-cancer core fitness	NA	NA	NA	NA
HAUS4	DAM pan-cancer core fitness	NA	NA	NA	NA
HAUS5	NA	Hart 2017	NA	NA	NA
HAUS7	DAM pan-cancer core fitness	NA	NA	NA	NA
HCFC1	DAM pan-cancer core fitness	Hart 2017	NA	NA	NA
HDAC3	NA	Hart 2017	NA	NA	NA
HEATR1	DAM pan-cancer core fitness	Hart 2017	Achilles	204 hybrid genes	42 tumor associated genes
HINFP	DAM pan-cancer core fitness	Hart 2017	NA	NA	NA
HIST1H1B	NA	NA	NA	204 hybrid genes	NA
HIST1H2AJ	DAM pan-cancer core fitness	Hart 2017	NA	NA	NA
HIST1H2AM	DAM pan-cancer core fitness	NA	NA	NA	NA
HIST1H2BB	DAM pan-cancer core fitness	NA	NA	NA	NA
HIST1H2BC	DAM pan-cancer core fitness	NA	NA	204 hybrid genes	NA
HIST1H2BF	DAM pan-cancer core fitness	NA	NA	NA	NA
HIST1H2BH	DAM pan-cancer core fitness	NA	NA	NA	NA
HIST1H2BL	DAM pan-cancer core fitness	NA	NA	NA	NA
HIST1H2BN	DAM pan-cancer core fitness	NA	NA	NA	NA
HIST2H2AA3	NA	Hart 2017	NA	NA	NA
HJURP	NA	Hart 2017	NA	NA	NA
HNRNPA0	NA	NA	NA	204 hybrid genes	NA
HNRNPA1	NA	NA	NA	204 hybrid genes	42 tumor associated genes
HNRNPA2B1	NA	NA	NA	204 hybrid genes	NA
HNRNPA3	NA	NA	NA	204 hybrid genes	NA
HNRNPAB	NA	NA	NA	204 hybrid genes	NA
HNRNPC	DAM pan-cancer core fitness	Hart 2017	Achilles	204 hybrid genes	NA
HNRNPH1	NA	NA	NA	204 hybrid genes	NA
HNRNPK	DAM pan-cancer core fitness	Hart 2017	Achilles	204 hybrid genes	NA
HNRNPL	DAM pan-cancer core fitness	Hart 2017	Achilles	204 hybrid genes	NA
HNRNPM	NA	NA	NA	204 hybrid genes	NA
HNRNPU	NA	Hart 2017	Achilles	204 hybrid genes	NA
HNRNPUL1	NA	NA	NA	204 hybrid genes	NA
HNRNPUL2	NA	NA	NA	204 hybrid genes	NA
HSD17B10	NA	Hart 2017	NA	NA	NA
HSP90AB1	NA	NA	NA	204 hybrid genes	NA
HSPA9	NA	Hart 2017	NA	NA	NA
HSPD1	NA	Hart 2017	NA	NA	NA
HUWE1	NA	Hart 2017	NA	NA	NA
HYPK	NA	Hart 2017	NA	NA	NA
IARS	DAM pan-cancer core fitness	Hart 2017	NA	NA	NA
IGBP1	DAM pan-cancer core fitness	Hart 2017	NA	NA	NA
IGF2BP1	NA	NA	NA	204 hybrid genes	NA
IGF2BP3	NA	NA	NA	204 hybrid genes	42 tumor associated genes
ILF2	NA	NA	Achilles	204 hybrid genes	NA
ILF3	NA	Hart 2017	Achilles	204 hybrid genes	42 tumor associated genes
IMP3	DAM pan-cancer core fitness	Hart 2017	NA	NA	NA
IMP4	NA	Hart 2017	NA	NA	NA
INCENP	DAM pan-cancer core fitness	NA	NA	NA	NA
INTS1	NA	Hart 2017	NA	NA	NA
INTS2	DAM pan-cancer core fitness	NA	NA	NA	NA
INTS3	NA	Hart 2017	NA	NA	NA
INTS4	DAM pan-cancer core fitness	NA	NA	NA	NA
INTS8	NA	Hart 2017	NA	NA	NA
INTS9	DAM pan-cancer core fitness	Hart 2017	NA	NA	NA
IPO13	NA	Hart 2017	NA	NA	NA
ISCU	DAM pan-cancer core fitness	Hart 2017	NA	NA	NA
ISG20L2	NA	Hart 2017	NA	NA	NA
KANSL2	DAM pan-cancer core fitness	NA	NA	NA	NA
KANSL3	NA	Hart 2017	NA	NA	NA
KARS	DAM pan-cancer core fitness	Hart 2017	NA	NA	NA
KAT8	DAM pan-cancer core fitness	Hart 2017	NA	NA	NA
KIF11	DAM pan-cancer core fitness	Hart 2017	NA	NA	NA
KIF23	DAM pan-cancer core fitness	Hart 2017	NA	NA	NA
KIN	DAM pan-cancer core fitness	NA	NA	NA	NA
KPNB1	DAM pan-cancer core fitness	Hart 2017	Achilles	204 hybrid genes	NA
KRI1	NA	Hart 2017	NA	NA	NA
KRR1	NA	Hart 2017	NA	NA	NA
KRTAP4-11	DAM pan-cancer core fitness	NA	NA	NA	NA
KRTAP5-10	DAM pan-cancer core fitness	NA	NA	NA	NA
KRTAP5-6	DAM pan-cancer core fitness	NA	NA	NA	NA
KRTAP9-4	DAM pan-cancer core fitness	NA	NA	NA	NA
LARP1	NA	NA	NA	204 hybrid genes	NA
LARS	DAM pan-cancer core fitness	Hart 2017	Achilles	204 hybrid genes	NA
LAS1L	NA	Hart 2017	NA	NA	NA
LBR	NA	NA	NA	204 hybrid genes	NA
LCE1A	DAM pan-cancer core fitness	NA	NA	NA	NA
LCE1E	DAM pan-cancer core fitness	NA	NA	NA	NA
LCE1F	DAM pan-cancer core fitness	NA	NA	NA	NA
LONP1	NA	Hart 2017	NA	NA	NA
LRR1	NA	Hart 2017	NA	NA	NA
LSG1	NA	Hart 2017	NA	NA	NA
LSM11	NA	Hart 2017	NA	NA	NA
LSM12	NA	Hart 2017	NA	NA	NA
LSM2	DAM pan-cancer core fitness	Hart 2017	NA	NA	NA
LSM3	DAM pan-cancer core fitness	NA	NA	NA	NA
LSM4	DAM pan-cancer core fitness	NA	NA	NA	NA
LSM5	DAM pan-cancer core fitness	NA	NA	NA	NA
LSM7	DAM pan-cancer core fitness	Hart 2017	NA	NA	NA
LUC7L3	DAM pan-cancer core fitness	Hart 2017	NA	NA	NA
LYAR	NA	NA	NA	204 hybrid genes	42 tumor associated genes
MAD2L1	DAM pan-cancer core fitness	Hart 2017	NA	NA	NA
MAGOH	NA	Hart 2017	NA	NA	NA
MAK16	DAM pan-cancer core fitness	Hart 2017	NA	NA	NA
MAP4	NA	NA	NA	204 hybrid genes	NA
MARS	DAM pan-cancer core fitness	Hart 2017	NA	NA	NA
MARS2	NA	Hart 2017	NA	NA	NA
MASTL	DAM pan-cancer core fitness	Hart 2017	NA	NA	NA
MATR3	NA	NA	NA	204 hybrid genes	NA
MCM2	DAM pan-cancer core fitness	NA	NA	NA	NA
MCM3	DAM pan-cancer core fitness	Hart 2017	Achilles	204 hybrid genes	42 tumor associated genes
MCM3AP	DAM pan-cancer core fitness	Hart 2017	NA	NA	NA
MCM4	NA	Hart 2017	NA	NA	NA
MCM5	DAM pan-cancer core fitness	Hart 2017	Achilles	204 hybrid genes	42 tumor associated genes
MCM6	DAM pan-cancer core fitness	NA	NA	NA	NA
MCM7	DAM pan-cancer core fitness	Hart 2017	NA	NA	NA
MDN1	DAM pan-cancer core fitness	Hart 2017	NA	NA	NA
MED11	DAM pan-cancer core fitness	Hart 2017	NA	NA	NA
MED12	NA	Hart 2017	NA	NA	NA
MED18	NA	Hart 2017	NA	NA	NA
MED20	DAM pan-cancer core fitness	NA	NA	NA	NA
MED27	DAM pan-cancer core fitness	Hart 2017	NA	NA	NA
MED28	DAM pan-cancer core fitness	NA	NA	NA	NA
MED30	DAM pan-cancer core fitness	Hart 2017	NA	NA	NA
MED31	DAM pan-cancer core fitness	NA	NA	NA	NA
MED4	DAM pan-cancer core fitness	NA	NA	NA	NA
MED6	DAM pan-cancer core fitness	NA	NA	NA	NA
MEPCE	DAM pan-cancer core fitness	Hart 2017	NA	NA	NA
METTL16	NA	Hart 2017	NA	NA	NA
MFAP1	DAM pan-cancer core fitness	NA	NA	NA	NA
MKI67	NA	NA	NA	204 hybrid genes	42 tumor associated genes
MMS22L	NA	Hart 2017	NA	NA	NA
MOV10	NA	NA	NA	204 hybrid genes	NA
MPHOSPH10	DAM pan-cancer core fitness	Hart 2017	NA	NA	NA
MRP63	NA	Hart 2017	NA	NA	NA
MRPL18	NA	Hart 2017	NA	NA	NA
MRPL28	NA	Hart 2017	NA	NA	NA
MRPL38	NA	Hart 2017	NA	NA	NA
MRPL4	NA	Hart 2017	NA	NA	NA
MRPL43	NA	Hart 2017	NA	NA	NA
MRPL45	NA	Hart 2017	NA	NA	NA
MRPL46	NA	Hart 2017	NA	NA	NA
MRPL53	NA	Hart 2017	NA	NA	NA
MRPS14	NA	Hart 2017	NA	NA	NA
MRPS24	NA	Hart 2017	NA	NA	NA
MRPS34	NA	Hart 2017	NA	NA	NA
MSTO1	NA	Hart 2017	NA	NA	NA
MTBP	DAM pan-cancer core fitness	NA	NA	NA	NA
MTG2	NA	Hart 2017	NA	NA	NA
MVK	NA	Hart 2017	NA	NA	NA
MYBBP1A	NA	Hart 2017	NA	204 hybrid genes	42 tumor associated genes
MYC	NA	Hart 2017	NA	NA	NA
MYH9	NA	NA	NA	204 hybrid genes	NA
MYO1C	NA	NA	NA	204 hybrid genes	NA
MZT1	DAM pan-cancer core fitness	NA	NA	NA	NA
NAA10	NA	Hart 2017	NA	NA	NA
NAA38	DAM pan-cancer core fitness	Hart 2017	NA	NA	NA
NAA50	DAM pan-cancer core fitness	Hart 2017	NA	NA	NA
NAMPT	NA	Hart 2017	NA	NA	NA
NAPA	DAM pan-cancer core fitness	Hart 2017	NA	NA	NA
NARFL	DAM pan-cancer core fitness	Hart 2017	NA	NA	NA
NARS	DAM pan-cancer core fitness	Hart 2017	NA	NA	NA
NAT10	DAM pan-cancer core fitness	Hart 2017	Achilles	204 hybrid genes	42 tumor associated genes
NCAPG	DAM pan-cancer core fitness	NA	NA	NA	NA
NCBP1	DAM pan-cancer core fitness	Hart 2017	NA	NA	NA
NCBP2	DAM pan-cancer core fitness	Hart 2017	NA	NA	NA
NCL	NA	NA	NA	204 hybrid genes	NA
NCOA5	NA	NA	NA	204 hybrid genes	NA
NDC80	DAM pan-cancer core fitness	Hart 2017	NA	NA	NA
NDUFA13	NA	Hart 2017	NA	NA	NA
NEDD1	DAM pan-cancer core fitness	NA	NA	NA	NA
NEDD8	DAM pan-cancer core fitness	Hart 2017	NA	NA	NA
NELFB	NA	Hart 2017	NA	NA	NA
NHP2	NA	Hart 2017	NA	NA	NA
NHP2L1	DAM pan-cancer core fitness	Hart 2017	NA	NA	NA
NIFK	DAM pan-cancer core fitness	NA	NA	NA	NA
NIP7	DAM pan-cancer core fitness	Hart 2017	NA	NA	NA
NKAP	DAM pan-cancer core fitness	Hart 2017	NA	NA	NA
NKRF	NA	NA	NA	204 hybrid genes	NA
NLE1	NA	Hart 2017	NA	NA	NA
NMD3	DAM pan-cancer core fitness	Hart 2017	NA	NA	NA
NMT1	NA	Hart 2017	NA	NA	NA
NOC4L	NA	Hart 2017	Achilles	204 hybrid genes	NA
NOL10	DAM pan-cancer core fitness	Hart 2017	NA	NA	NA
NOL11	NA	Hart 2017	NA	NA	NA
NOL6	NA	Hart 2017	Achilles	204 hybrid genes	42 tumor associated genes
NOL9	NA	Hart 2017	NA	NA	NA
NONO	NA	NA	NA	204 hybrid genes	42 tumor associated genes
NOP16	DAM pan-cancer core fitness	Hart 2017	NA	NA	NA
NOP2	NA	Hart 2017	Achilles	204 hybrid genes	42 tumor associated genes
NOP56	DAM pan-cancer core fitness	Hart 2017	Achilles	204 hybrid genes	42 tumor associated genes
NOP58	DAM pan-cancer core fitness	NA	Achilles	204 hybrid genes	NA
NOP9	NA	Hart 2017	NA	NA	NA
NPIPA5	DAM pan-cancer core fitness	NA	NA	NA	NA
NPLOC4	DAM pan-cancer core fitness	Hart 2017	NA	NA	NA
NPM1	NA	NA	NA	204 hybrid genes	42 tumor associated genes
NPM3	NA	NA	NA	204 hybrid genes	NA
NRDE2	DAM pan-cancer core fitness	NA	NA	NA	NA
NRF1	DAM pan-cancer core fitness	NA	NA	NA	NA
NSA2	DAM pan-cancer core fitness	Hart 2017	NA	NA	NA
NSF	DAM pan-cancer core fitness	Hart 2017	NA	NA	NA
NSL1	DAM pan-cancer core fitness	NA	NA	NA	NA
NUBP1	DAM pan-cancer core fitness	NA	NA	NA	NA
NUDC	NA	Hart 2017	NA	NA	NA
NUDCD3	NA	Hart 2017	NA	NA	NA
NUDT21	DAM pan-cancer core fitness	Hart 2017	NA	NA	NA
NUDT4	NA	Hart 2017	NA	NA	NA
NUF2	DAM pan-cancer core fitness	Hart 2017	NA	NA	NA
NUP133	DAM pan-cancer core fitness	Hart 2017	NA	NA	NA
NUP155	DAM pan-cancer core fitness	Hart 2017	NA	NA	NA
NUP160	DAM pan-cancer core fitness	Hart 2017	NA	NA	NA
NUP214	DAM pan-cancer core fitness	Hart 2017	NA	NA	NA
NUP85	NA	Hart 2017	NA	NA	NA
NUP88	NA	Hart 2017	NA	NA	NA
NUP93	NA	Hart 2017	NA	NA	NA
NUS1	DAM pan-cancer core fitness	Hart 2017	NA	NA	NA
NUTF2	DAM pan-cancer core fitness	Hart 2017	NA	NA	NA
NVL	NA	Hart 2017	NA	NA	NA
NXF1	NA	Hart 2017	NA	NA	NA
OGDH	NA	Hart 2017	NA	NA	NA
OGT	NA	Hart 2017	NA	NA	NA
ORAOV1	NA	Hart 2017	NA	NA	NA
ORC6	DAM pan-cancer core fitness	Hart 2017	NA	NA	NA
OSGEP	NA	Hart 2017	NA	NA	NA
PA2G4	NA	NA	NA	204 hybrid genes	NA
PABPC1	NA	Hart 2017	NA	204 hybrid genes	42 tumor associated genes
PABPC4	NA	NA	NA	204 hybrid genes	NA
PAFAH1B1	DAM pan-cancer core fitness	Hart 2017	NA	NA	NA
PAICS	NA	Hart 2017	NA	NA	NA
PAK1IP1	NA	Hart 2017	NA	NA	NA
PAM16	DAM pan-cancer core fitness	NA	NA	NA	NA
PARP1	NA	NA	NA	204 hybrid genes	NA
PCBP1	DAM pan-cancer core fitness	NA	Achilles	204 hybrid genes	NA
PCBP2	NA	NA	Achilles	204 hybrid genes	NA
PCID2	DAM pan-cancer core fitness	Hart 2017	NA	NA	NA
PCNA	DAM pan-cancer core fitness	Hart 2017	NA	NA	NA
PDCD11	NA	NA	Achilles	204 hybrid genes	42 tumor associated genes
PDCD7	DAM pan-cancer core fitness	NA	NA	NA	NA
PES1	DAM pan-cancer core fitness	NA	NA	NA	NA
PFDN2	DAM pan-cancer core fitness	Hart 2017	NA	NA	NA
PFN1	NA	Hart 2017	NA	204 hybrid genes	NA
PGAM1	NA	Hart 2017	NA	NA	NA
PGAM4	DAM pan-cancer core fitness	NA	NA	NA	NA
PGAM5	NA	NA	NA	204 hybrid genes	42 tumor associated genes
PGGT1B	NA	Hart 2017	NA	NA	NA
PGK1	NA	Hart 2017	NA	NA	NA
PHAX	DAM pan-cancer core fitness	NA	NA	NA	NA
PHB	DAM pan-cancer core fitness	Hart 2017	NA	NA	NA
PHB2	DAM pan-cancer core fitness	Hart 2017	NA	NA	NA
PHF5A	NA	Hart 2017	NA	NA	NA
PHGDH	NA	NA	NA	204 hybrid genes	NA
PISD	DAM pan-cancer core fitness	NA	NA	NA	NA
PKMYT1	DAM pan-cancer core fitness	Hart 2017	NA	NA	NA
PLEC	NA	NA	NA	204 hybrid genes	NA
PLK1	DAM pan-cancer core fitness	Hart 2017	NA	NA	NA
PLRG1	NA	Hart 2017	Achilles	204 hybrid genes	NA
PMF1-BGLAP	DAM pan-cancer core fitness	NA	NA	NA	NA
PMPCA	NA	Hart 2017	NA	NA	NA
PMPCB	NA	Hart 2017	NA	NA	NA
PNKP	NA	Hart 2017	NA	NA	NA
POLA2	DAM pan-cancer core fitness	Hart 2017	NA	NA	NA
POLD1	DAM pan-cancer core fitness	NA	NA	NA	NA
POLD2	DAM pan-cancer core fitness	NA	NA	NA	NA
POLD3	DAM pan-cancer core fitness	NA	NA	NA	NA
POLE	DAM pan-cancer core fitness	NA	NA	NA	NA
POLR1A	NA	Hart 2017	NA	NA	NA
POLR1B	DAM pan-cancer core fitness	Hart 2017	NA	NA	NA
POLR1C	NA	Hart 2017	NA	NA	NA
POLR2A	DAM pan-cancer core fitness	Hart 2017	NA	NA	NA
POLR2B	DAM pan-cancer core fitness	Hart 2017	NA	NA	NA
POLR2C	DAM pan-cancer core fitness	Hart 2017	NA	NA	NA
POLR2D	DAM pan-cancer core fitness	Hart 2017	NA	NA	NA
POLR2E	DAM pan-cancer core fitness	Hart 2017	NA	NA	NA
POLR2F	DAM pan-cancer core fitness	NA	NA	NA	NA
POLR2G	DAM pan-cancer core fitness	Hart 2017	NA	NA	NA
POLR2H	DAM pan-cancer core fitness	Hart 2017	NA	NA	NA
POLR2I	DAM pan-cancer core fitness	Hart 2017	NA	NA	NA
POLR2K	DAM pan-cancer core fitness	NA	NA	NA	NA
POLR2L	DAM pan-cancer core fitness	Hart 2017	NA	NA	NA
POLR3A	DAM pan-cancer core fitness	Hart 2017	NA	NA	NA
POLR3B	DAM pan-cancer core fitness	NA	NA	NA	NA
POLR3C	NA	Hart 2017	NA	NA	NA
POLR3F	DAM pan-cancer core fitness	NA	NA	NA	NA
POLR3H	NA	Hart 2017	NA	NA	NA
POLR3K	NA	Hart 2017	NA	NA	NA
POLRMT	NA	Hart 2017	NA	NA	NA
POP1	NA	Hart 2017	NA	204 hybrid genes	NA
POP5	NA	Hart 2017	NA	NA	NA
PPA1	NA	Hart 2017	NA	NA	NA
PPAN	NA	Hart 2017	NA	NA	NA
PPAT	NA	Hart 2017	NA	NA	NA
PPIL2	DAM pan-cancer core fitness	Hart 2017	NA	NA	NA
PPP1CB	DAM pan-cancer core fitness	NA	NA	NA	NA
PPP2CA	NA	Hart 2017	NA	NA	NA
PPP2R1A	NA	NA	NA	204 hybrid genes	NA
PPP2R4	NA	Hart 2017	NA	NA	NA
PPP4C	NA	Hart 2017	NA	NA	NA
PPWD1	DAM pan-cancer core fitness	Hart 2017	NA	NA	NA
PRC1	DAM pan-cancer core fitness	NA	NA	NA	NA
PRDX1	NA	NA	NA	204 hybrid genes	NA
PREB	NA	Hart 2017	NA	NA	NA
PRELID1	DAM pan-cancer core fitness	Hart 2017	NA	NA	NA
PRIM1	NA	Hart 2017	NA	NA	NA
PRKDC	NA	NA	NA	204 hybrid genes	42 tumor associated genes
PRMT1	DAM pan-cancer core fitness	Hart 2017	NA	NA	NA
PRMT5	NA	Hart 2017	NA	NA	NA
PRPF19	DAM pan-cancer core fitness	Hart 2017	Achilles	204 hybrid genes	NA
PRPF3	NA	NA	NA	204 hybrid genes	NA
PRPF31	NA	Hart 2017	NA	NA	NA
PRPF38A	DAM pan-cancer core fitness	Hart 2017	NA	NA	NA
PRPF38B	DAM pan-cancer core fitness	Hart 2017	NA	NA	NA
PRPF4	DAM pan-cancer core fitness	Hart 2017	Achilles	204 hybrid genes	NA
PRPF40A	DAM pan-cancer core fitness	NA	NA	204 hybrid genes	NA
PRPF6	DAM pan-cancer core fitness	NA	NA	NA	NA
PRPF8	DAM pan-cancer core fitness	Hart 2017	Achilles	204 hybrid genes	NA
PSIP1	NA	NA	NA	204 hybrid genes	NA
PSMA1	DAM pan-cancer core fitness	Hart 2017	NA	NA	NA
PSMA2	DAM pan-cancer core fitness	Hart 2017	NA	NA	NA
PSMA3	DAM pan-cancer core fitness	Hart 2017	NA	NA	NA
PSMA4	DAM pan-cancer core fitness	Hart 2017	NA	NA	NA
PSMA5	DAM pan-cancer core fitness	Hart 2017	NA	NA	NA
PSMA6	DAM pan-cancer core fitness	Hart 2017	NA	NA	NA
PSMA7	DAM pan-cancer core fitness	Hart 2017	NA	NA	NA
PSMB1	DAM pan-cancer core fitness	Hart 2017	NA	NA	NA
PSMB2	DAM pan-cancer core fitness	Hart 2017	NA	NA	NA
PSMB3	DAM pan-cancer core fitness	Hart 2017	NA	NA	NA
PSMB4	DAM pan-cancer core fitness	Hart 2017	NA	NA	NA
PSMB5	DAM pan-cancer core fitness	NA	NA	NA	NA
PSMB6	DAM pan-cancer core fitness	NA	NA	NA	NA
PSMB7	DAM pan-cancer core fitness	Hart 2017	NA	NA	NA
PSMC1	DAM pan-cancer core fitness	NA	NA	NA	NA
PSMC2	NA	Hart 2017	NA	NA	NA
PSMC3	DAM pan-cancer core fitness	Hart 2017	NA	NA	NA
PSMC4	DAM pan-cancer core fitness	NA	NA	NA	NA
PSMC5	NA	Hart 2017	NA	NA	NA
PSMC6	DAM pan-cancer core fitness	Hart 2017	NA	NA	NA
PSMD1	DAM pan-cancer core fitness	Hart 2017	NA	NA	NA
PSMD11	DAM pan-cancer core fitness	Hart 2017	NA	NA	NA
PSMD12	DAM pan-cancer core fitness	Hart 2017	NA	NA	NA
PSMD13	NA	Hart 2017	NA	NA	NA
PSMD14	DAM pan-cancer core fitness	Hart 2017	NA	NA	NA
PSMD2	DAM pan-cancer core fitness	NA	NA	NA	NA
PSMD3	DAM pan-cancer core fitness	Hart 2017	NA	NA	NA
PSMD4	NA	Hart 2017	NA	NA	NA
PSMD6	DAM pan-cancer core fitness	NA	NA	NA	NA
PSMG3	NA	Hart 2017	NA	NA	NA
PTBP1	NA	NA	NA	204 hybrid genes	NA
PTPN23	NA	Hart 2017	NA	NA	NA
PUF60	DAM pan-cancer core fitness	Hart 2017	NA	NA	NA
PWP1	NA	NA	NA	204 hybrid genes	NA
PWP2	DAM pan-cancer core fitness	Hart 2017	Achilles	204 hybrid genes	42 tumor associated genes
QARS	DAM pan-cancer core fitness	Hart 2017	NA	NA	NA
RAB7A	NA	NA	NA	204 hybrid genes	NA
RABGGTB	DAM pan-cancer core fitness	Hart 2017	NA	NA	NA
RAC2	NA	NA	NA	204 hybrid genes	NA
RACGAP1	DAM pan-cancer core fitness	Hart 2017	NA	NA	NA
RAD21	NA	Hart 2017	NA	NA	NA
RAD51	DAM pan-cancer core fitness	NA	NA	NA	NA
RAD51C	NA	Hart 2017	NA	NA	NA
RAD51D	NA	Hart 2017	NA	NA	NA
RAE1	NA	Hart 2017	NA	NA	NA
RALY	NA	NA	NA	204 hybrid genes	42 tumor associated genes
RAN	DAM pan-cancer core fitness	Hart 2017	NA	NA	NA
RANGAP1	DAM pan-cancer core fitness	Hart 2017	NA	NA	NA
RARS	NA	NA	NA	204 hybrid genes	NA
RARS2	NA	Hart 2017	NA	NA	NA
RBBP4	NA	NA	Achilles	204 hybrid genes	NA
RBBP6	DAM pan-cancer core fitness	Hart 2017	NA	204 hybrid genes	NA
RBM14	DAM pan-cancer core fitness	Hart 2017	Achilles	204 hybrid genes	NA
RBM15	NA	NA	NA	204 hybrid genes	NA
RBM17	DAM pan-cancer core fitness	Hart 2017	NA	NA	NA
RBM25	DAM pan-cancer core fitness	NA	Achilles	204 hybrid genes	NA
RBM39	NA	NA	Achilles	204 hybrid genes	NA
RBM4	NA	NA	NA	204 hybrid genes	NA
RBM8A	NA	Hart 2017	NA	NA	NA
RBMX	DAM pan-cancer core fitness	Hart 2017	NA	204 hybrid genes	42 tumor associated genes
RBX1	DAM pan-cancer core fitness	Hart 2017	NA	NA	NA
RCC1	DAM pan-cancer core fitness	Hart 2017	NA	NA	NA
RCC2	NA	NA	NA	204 hybrid genes	42 tumor associated genes
RCL1	NA	Hart 2017	NA	NA	NA
RFC2	NA	Hart 2017	NA	NA	NA
RFC4	DAM pan-cancer core fitness	Hart 2017	NA	NA	NA
RFC5	DAM pan-cancer core fitness	Hart 2017	NA	NA	NA
RFK	NA	Hart 2017	NA	NA	NA
RGPD6	DAM pan-cancer core fitness	NA	NA	NA	NA
RHEB	NA	Hart 2017	NA	NA	NA
RIOK1	DAM pan-cancer core fitness	NA	NA	NA	NA
RIOK2	DAM pan-cancer core fitness	Hart 2017	NA	NA	NA
RNASEH1	NA	NA	NA	204 hybrid genes	NA
RNASEH2A	NA	NA	NA	204 hybrid genes	NA
RNASEH2B	NA	NA	NA	204 hybrid genes	NA
RNASEH2C	NA	NA	NA	204 hybrid genes	NA
RNF113A	DAM pan-cancer core fitness	NA	NA	NA	NA
RNF20	NA	Hart 2017	NA	NA	NA
RNGTT	DAM pan-cancer core fitness	Hart 2017	NA	NA	NA
RNPS1	DAM pan-cancer core fitness	NA	NA	NA	NA
ROMO1	NA	Hart 2017	NA	NA	NA
RPA1	DAM pan-cancer core fitness	Hart 2017	NA	NA	NA
RPA2	DAM pan-cancer core fitness	Hart 2017	NA	NA	NA
RPA3	DAM pan-cancer core fitness	NA	NA	NA	NA
RPAP1	DAM pan-cancer core fitness	NA	NA	NA	NA
RPF2	DAM pan-cancer core fitness	Hart 2017	NA	NA	NA
RPL10A	DAM pan-cancer core fitness	Hart 2017	NA	NA	NA
RPL11	DAM pan-cancer core fitness	Hart 2017	NA	NA	NA
RPL12	DAM pan-cancer core fitness	Hart 2017	NA	NA	NA
RPL13	DAM pan-cancer core fitness	Hart 2017	NA	NA	NA
RPL13A	DAM pan-cancer core fitness	NA	NA	NA	NA
RPL14	DAM pan-cancer core fitness	Hart 2017	NA	NA	NA
RPL15	DAM pan-cancer core fitness	NA	NA	NA	NA
RPL17	DAM pan-cancer core fitness	NA	NA	NA	NA
RPL18	DAM pan-cancer core fitness	Hart 2017	NA	NA	NA
RPL18A	DAM pan-cancer core fitness	Hart 2017	NA	NA	NA
RPL19	DAM pan-cancer core fitness	Hart 2017	NA	NA	NA
RPL21	DAM pan-cancer core fitness	NA	NA	NA	NA
RPL22	DAM pan-cancer core fitness	NA	NA	NA	NA
RPL23	DAM pan-cancer core fitness	Hart 2017	NA	NA	NA
RPL23A	DAM pan-cancer core fitness	NA	NA	NA	NA
RPL24	NA	Hart 2017	NA	NA	NA
RPL26	DAM pan-cancer core fitness	NA	NA	NA	NA
RPL27	DAM pan-cancer core fitness	Hart 2017	NA	NA	NA
RPL27A	DAM pan-cancer core fitness	Hart 2017	NA	NA	NA
RPL3	DAM pan-cancer core fitness	Hart 2017	NA	NA	NA
RPL30	DAM pan-cancer core fitness	Hart 2017	NA	NA	NA
RPL31	DAM pan-cancer core fitness	NA	NA	NA	NA
RPL32	DAM pan-cancer core fitness	NA	NA	NA	NA
RPL34	DAM pan-cancer core fitness	NA	NA	NA	NA
RPL35	DAM pan-cancer core fitness	Hart 2017	NA	NA	NA
RPL35A	DAM pan-cancer core fitness	Hart 2017	NA	NA	NA
RPL36	DAM pan-cancer core fitness	Hart 2017	NA	NA	NA
RPL36A	DAM pan-cancer core fitness	NA	NA	NA	NA
RPL37A	DAM pan-cancer core fitness	Hart 2017	NA	NA	NA
RPL38	DAM pan-cancer core fitness	NA	NA	NA	NA
RPL4	DAM pan-cancer core fitness	Hart 2017	NA	NA	NA
RPL5	DAM pan-cancer core fitness	NA	NA	NA	NA
RPL6	DAM pan-cancer core fitness	Hart 2017	NA	NA	NA
RPL7	DAM pan-cancer core fitness	NA	NA	NA	NA
RPL7L1	DAM pan-cancer core fitness	NA	NA	NA	NA
RPL8	DAM pan-cancer core fitness	Hart 2017	NA	NA	NA
RPLP0	DAM pan-cancer core fitness	Hart 2017	NA	NA	NA
RPLP1	DAM pan-cancer core fitness	Hart 2017	NA	NA	NA
RPLP2	DAM pan-cancer core fitness	Hart 2017	NA	NA	NA
RPP21	NA	Hart 2017	NA	NA	NA
RPP38	NA	Hart 2017	NA	NA	NA
RPS11	DAM pan-cancer core fitness	Hart 2017	NA	NA	NA
RPS12	DAM pan-cancer core fitness	Hart 2017	NA	NA	NA
RPS13	DAM pan-cancer core fitness	Hart 2017	NA	NA	NA
RPS14	DAM pan-cancer core fitness	NA	NA	NA	NA
RPS15	DAM pan-cancer core fitness	NA	NA	NA	NA
RPS15A	DAM pan-cancer core fitness	Hart 2017	NA	NA	NA
RPS16	DAM pan-cancer core fitness	Hart 2017	NA	NA	NA
RPS18	DAM pan-cancer core fitness	Hart 2017	NA	NA	NA
RPS19	DAM pan-cancer core fitness	Hart 2017	NA	NA	NA
RPS2	DAM pan-cancer core fitness	Hart 2017	NA	NA	NA
RPS20	DAM pan-cancer core fitness	Hart 2017	NA	NA	NA
RPS21	DAM pan-cancer core fitness	Hart 2017	NA	NA	NA
RPS23	DAM pan-cancer core fitness	Hart 2017	NA	NA	NA
RPS24	DAM pan-cancer core fitness	NA	NA	NA	NA
RPS27A	DAM pan-cancer core fitness	NA	NA	NA	NA
RPS28	DAM pan-cancer core fitness	NA	NA	NA	NA
RPS3	DAM pan-cancer core fitness	Hart 2017	NA	NA	NA
RPS4X	DAM pan-cancer core fitness	Hart 2017	NA	NA	NA
RPS5	DAM pan-cancer core fitness	Hart 2017	NA	NA	NA
RPS6	DAM pan-cancer core fitness	Hart 2017	NA	NA	NA
RPS7	DAM pan-cancer core fitness	Hart 2017	NA	NA	NA
RPS8	DAM pan-cancer core fitness	Hart 2017	NA	NA	NA
RPS9	DAM pan-cancer core fitness	NA	NA	NA	NA
RPSA	DAM pan-cancer core fitness	NA	NA	NA	NA
RRM1	DAM pan-cancer core fitness	Hart 2017	NA	NA	NA
RRM2	DAM pan-cancer core fitness	NA	NA	NA	NA
RRN3	DAM pan-cancer core fitness	NA	NA	NA	NA
RRP1	NA	Hart 2017	NA	NA	NA
RRP12	NA	Hart 2017	NA	NA	NA
RRS1	NA	Hart 2017	NA	NA	NA
RSL1D1	DAM pan-cancer core fitness	NA	NA	NA	NA
RSL24D1	DAM pan-cancer core fitness	NA	NA	NA	NA
RTCB	NA	Hart 2017	NA	204 hybrid genes	NA
RTFDC1	DAM pan-cancer core fitness	NA	NA	NA	NA
RUVBL2	DAM pan-cancer core fitness	Hart 2017	Achilles	204 hybrid genes	NA
SACM1L	DAM pan-cancer core fitness	Hart 2017	NA	NA	NA
SAE1	NA	Hart 2017	NA	NA	NA
SAFB	NA	NA	NA	204 hybrid genes	NA
SAMM50	NA	Hart 2017	NA	NA	NA
SAP18	DAM pan-cancer core fitness	Hart 2017	NA	NA	NA
SAP30BP	DAM pan-cancer core fitness	NA	NA	NA	NA
SARS	DAM pan-cancer core fitness	Hart 2017	NA	NA	NA
SARS2	NA	Hart 2017	NA	NA	NA
SART1	NA	NA	Achilles	204 hybrid genes	NA
SART3	DAM pan-cancer core fitness	Hart 2017	Achilles	204 hybrid genes	NA
SBNO1	NA	Hart 2017	NA	NA	NA
SCFD1	DAM pan-cancer core fitness	NA	NA	NA	NA
SDAD1	DAM pan-cancer core fitness	Hart 2017	NA	NA	NA
SDE2	DAM pan-cancer core fitness	NA	NA	NA	NA
SDHC	NA	Hart 2017	NA	NA	NA
SEC13	DAM pan-cancer core fitness	Hart 2017	NA	NA	NA
SEC61G	DAM pan-cancer core fitness	NA	NA	NA	NA
SEH1L	NA	Hart 2017	NA	NA	NA
SERBP1	NA	NA	NA	204 hybrid genes	NA
SETX	NA	NA	NA	204 hybrid genes	NA
SF1	DAM pan-cancer core fitness	Hart 2017	NA	NA	NA
SF3A1	DAM pan-cancer core fitness	NA	NA	NA	NA
SF3A2	DAM pan-cancer core fitness	Hart 2017	NA	NA	NA
SF3A3	DAM pan-cancer core fitness	Hart 2017	NA	NA	NA
SF3B1	NA	Hart 2017	NA	NA	NA
SF3B14	DAM pan-cancer core fitness	NA	NA	NA	NA
SF3B2	DAM pan-cancer core fitness	Hart 2017	NA	NA	NA
SF3B3	DAM pan-cancer core fitness	Hart 2017	NA	NA	NA
SF3B4	DAM pan-cancer core fitness	NA	NA	NA	NA
SF3B5	DAM pan-cancer core fitness	Hart 2017	NA	NA	NA
SFPQ	DAM pan-cancer core fitness	NA	Achilles	204 hybrid genes	NA
SKIV2L2	DAM pan-cancer core fitness	NA	NA	204 hybrid genes	NA
SKP1	NA	Hart 2017	NA	NA	NA
SLC25A5	NA	NA	NA	204 hybrid genes	NA
SLC35B1	NA	Hart 2017	NA	NA	NA
SLMO2	DAM pan-cancer core fitness	Hart 2017	NA	NA	NA
SLU7	DAM pan-cancer core fitness	Hart 2017	NA	NA	NA
SMARCA4	NA	NA	NA	204 hybrid genes	NA
SMARCA5	NA	NA	NA	204 hybrid genes	42 tumor associated genes
SMC1A	NA	Hart 2017	NA	NA	NA
SMC2	NA	Hart 2017	NA	NA	NA
SMC4	DAM pan-cancer core fitness	Hart 2017	NA	NA	NA
SMU1	DAM pan-cancer core fitness	Hart 2017	NA	NA	NA
SNAPC1	DAM pan-cancer core fitness	Hart 2017	NA	NA	NA
SNAPC2	NA	Hart 2017	NA	NA	NA
SNAPC3	DAM pan-cancer core fitness	NA	NA	NA	NA
SNAPC4	NA	Hart 2017	NA	NA	NA
SND1	NA	NA	NA	204 hybrid genes	NA
SNRNP200	DAM pan-cancer core fitness	Hart 2017	Achilles	204 hybrid genes	NA
SNRNP25	NA	Hart 2017	NA	NA	NA
SNRNP27	DAM pan-cancer core fitness	Hart 2017	NA	NA	NA
SNRNP35	NA	Hart 2017	NA	NA	NA
SNRNP70	DAM pan-cancer core fitness	Hart 2017	NA	NA	NA
SNRPA1	DAM pan-cancer core fitness	Hart 2017	NA	NA	NA
SNRPB	DAM pan-cancer core fitness	NA	NA	NA	NA
SNRPD1	DAM pan-cancer core fitness	Hart 2017	Achilles	204 hybrid genes	NA
SNRPD2	DAM pan-cancer core fitness	Hart 2017	Achilles	204 hybrid genes	NA
SNRPD3	DAM pan-cancer core fitness	Hart 2017	NA	NA	NA
SNRPE	DAM pan-cancer core fitness	NA	NA	NA	NA
SNRPF	DAM pan-cancer core fitness	Hart 2017	NA	NA	NA
SNRPG	DAM pan-cancer core fitness	NA	NA	NA	NA
SNW1	DAM pan-cancer core fitness	Hart 2017	Achilles	204 hybrid genes	NA
SON	NA	NA	Achilles	204 hybrid genes	NA
SPATA5L1	NA	Hart 2017	NA	NA	NA
SPC24	DAM pan-cancer core fitness	Hart 2017	NA	NA	NA
SPC25	DAM pan-cancer core fitness	Hart 2017	NA	NA	NA
SPDL1	DAM pan-cancer core fitness	NA	NA	NA	NA
SRBD1	NA	Hart 2017	NA	NA	NA
SRP14	NA	NA	NA	204 hybrid genes	NA
SRP19	DAM pan-cancer core fitness	Hart 2017	NA	NA	NA
SRP54	DAM pan-cancer core fitness	NA	NA	NA	NA
SRPK1	NA	NA	NA	204 hybrid genes	42 tumor associated genes
SRRM1	NA	Hart 2017	NA	NA	NA
SRRM2	NA	NA	NA	204 hybrid genes	NA
SRRT	NA	Hart 2017	NA	NA	NA
SRSF1	DAM pan-cancer core fitness	Hart 2017	Achilles	204 hybrid genes	NA
SRSF10	NA	NA	NA	204 hybrid genes	NA
SRSF2	DAM pan-cancer core fitness	Hart 2017	NA	NA	NA
SRSF3	DAM pan-cancer core fitness	Hart 2017	NA	NA	NA
SRSF7	DAM pan-cancer core fitness	Hart 2017	Achilles	204 hybrid genes	NA
SS18L2	DAM pan-cancer core fitness	Hart 2017	NA	NA	NA
SSRP1	DAM pan-cancer core fitness	NA	Achilles	204 hybrid genes	42 tumor associated genes
SSU72	DAM pan-cancer core fitness	Hart 2017	NA	NA	NA
STAU1	NA	NA	NA	204 hybrid genes	42 tumor associated genes
STRAP	NA	NA	NA	204 hybrid genes	NA
SUPT16H	DAM pan-cancer core fitness	NA	Achilles	204 hybrid genes	42 tumor associated genes
SUPT5H	NA	Hart 2017	NA	NA	NA
SUPT6H	DAM pan-cancer core fitness	Hart 2017	NA	NA	NA
SUPV3L1	NA	Hart 2017	NA	NA	NA
SYMPK	DAM pan-cancer core fitness	Hart 2017	NA	NA	NA
SYNCRIP	NA	NA	NA	204 hybrid genes	42 tumor associated genes
SYS1	NA	Hart 2017	NA	NA	NA
TAF15	NA	NA	NA	204 hybrid genes	NA
TAF1B	NA	Hart 2017	NA	NA	NA
TAF6	NA	Hart 2017	NA	NA	NA
TANGO6	NA	Hart 2017	NA	NA	NA
TARS	DAM pan-cancer core fitness	Hart 2017	Achilles	204 hybrid genes	NA
TBCD	NA	Hart 2017	NA	NA	NA
TBL3	NA	Hart 2017	Achilles	204 hybrid genes	NA
TCEB1	DAM pan-cancer core fitness	NA	NA	NA	NA
TCOF1	NA	NA	NA	204 hybrid genes	NA
TCP1	DAM pan-cancer core fitness	Hart 2017	Achilles	204 hybrid genes	NA
TELO2	NA	Hart 2017	NA	NA	NA
TFAM	NA	Hart 2017	NA	NA	NA
TFIP11	DAM pan-cancer core fitness	NA	NA	NA	NA
TFRC	NA	Hart 2017	NA	NA	NA
THOC2	DAM pan-cancer core fitness	Hart 2017	NA	NA	NA
THOC3	DAM pan-cancer core fitness	Hart 2017	NA	NA	NA
THOC5	DAM pan-cancer core fitness	Hart 2017	NA	NA	NA
THRAP3	NA	NA	NA	204 hybrid genes	NA
TICRR	DAM pan-cancer core fitness	Hart 2017	NA	NA	NA
TIMM10	NA	Hart 2017	NA	NA	NA
TIMM13	NA	Hart 2017	NA	NA	NA
TIMM23	NA	Hart 2017	NA	NA	NA
TIMM44	NA	Hart 2017	NA	NA	NA
TMEM258	NA	Hart 2017	NA	NA	NA
TNPO3	DAM pan-cancer core fitness	Hart 2017	NA	NA	NA
TOMM22	NA	Hart 2017	NA	NA	NA
TOMM40	DAM pan-cancer core fitness	Hart 2017	NA	NA	NA
TONSL	DAM pan-cancer core fitness	Hart 2017	NA	NA	NA
TOP1	DAM pan-cancer core fitness	Hart 2017	NA	204 hybrid genes	42 tumor associated genes
TOP2A	DAM pan-cancer core fitness	Hart 2017	NA	NA	NA
TOP3A	DAM pan-cancer core fitness	NA	NA	NA	NA
TOPBP1	DAM pan-cancer core fitness	NA	NA	NA	NA
TPT1	NA	Hart 2017	NA	NA	NA
TPX2	NA	Hart 2017	NA	NA	NA
TRAPPC1	NA	Hart 2017	NA	NA	NA
TRAPPC11	DAM pan-cancer core fitness	NA	NA	NA	NA
TRAPPC2	DAM pan-cancer core fitness	NA	NA	NA	NA
TRAPPC3	DAM pan-cancer core fitness	Hart 2017	NA	NA	NA
TRAPPC8	DAM pan-cancer core fitness	NA	NA	NA	NA
TRIAP1	NA	Hart 2017	NA	NA	NA
TRMT112	DAM pan-cancer core fitness	Hart 2017	NA	NA	NA
TRMT5	NA	Hart 2017	NA	NA	NA
TRNAU1AP	NA	Hart 2017	NA	NA	NA
TRRAP	NA	Hart 2017	NA	NA	NA
TSG101	DAM pan-cancer core fitness	NA	NA	NA	NA
TSR1	NA	Hart 2017	Achilles	204 hybrid genes	NA
TSR2	DAM pan-cancer core fitness	NA	NA	NA	NA
TTC1	DAM pan-cancer core fitness	Hart 2017	NA	NA	NA
TTC27	DAM pan-cancer core fitness	Hart 2017	NA	NA	NA
TTI1	NA	Hart 2017	NA	NA	NA
TTI2	NA	Hart 2017	NA	NA	NA
TUBA1C	DAM pan-cancer core fitness	NA	NA	NA	NA
TUBB	DAM pan-cancer core fitness	Hart 2017	NA	NA	NA
TUBG1	DAM pan-cancer core fitness	Hart 2017	NA	NA	NA
TUBGCP2	DAM pan-cancer core fitness	Hart 2017	NA	NA	NA
TUBGCP3	DAM pan-cancer core fitness	Hart 2017	NA	NA	NA
TUBGCP4	DAM pan-cancer core fitness	NA	NA	NA	NA
TUBGCP6	NA	Hart 2017	NA	NA	NA
TUFM	NA	Hart 2017	NA	NA	NA
TUT1	DAM pan-cancer core fitness	Hart 2017	NA	NA	NA
TWISTNB	DAM pan-cancer core fitness	NA	NA	NA	NA
TXN	NA	Hart 2017	NA	NA	NA
TXNL4A	DAM pan-cancer core fitness	Hart 2017	NA	NA	NA
U2AF1	DAM pan-cancer core fitness	Hart 2017	NA	204 hybrid genes	42 tumor associated genes
U2AF2	DAM pan-cancer core fitness	Hart 2017	Achilles	204 hybrid genes	NA
U2SURP	DAM pan-cancer core fitness	NA	Achilles	204 hybrid genes	NA
UBA1	DAM pan-cancer core fitness	Hart 2017	NA	NA	NA
UBA52	DAM pan-cancer core fitness	Hart 2017	NA	NA	NA
UBB	DAM pan-cancer core fitness	NA	NA	NA	NA
UBE2I	DAM pan-cancer core fitness	NA	NA	NA	NA
UBE2L3	NA	Hart 2017	NA	NA	NA
UBE2M	NA	Hart 2017	NA	NA	NA
UBE2N	NA	Hart 2017	NA	NA	NA
UBL5	DAM pan-cancer core fitness	Hart 2017	NA	NA	NA
UBTF	DAM pan-cancer core fitness	Hart 2017	NA	NA	NA
UFD1L	DAM pan-cancer core fitness	NA	NA	NA	NA
UHRF1	NA	NA	NA	204 hybrid genes	NA
UPF1	DAM pan-cancer core fitness	Hart 2017	Achilles	204 hybrid genes	NA
UPF2	DAM pan-cancer core fitness	Hart 2017	NA	NA	NA
UQCRC1	NA	Hart 2017	NA	NA	NA
UQCRFS1	NA	Hart 2017	NA	NA	NA
UROD	NA	Hart 2017	NA	NA	NA
USP10	NA	NA	NA	204 hybrid genes	NA
USP39	DAM pan-cancer core fitness	Hart 2017	NA	NA	NA
USP5	NA	Hart 2017	NA	NA	NA
USPL1	DAM pan-cancer core fitness	Hart 2017	NA	NA	NA
UTP14A	NA	NA	NA	204 hybrid genes	NA
UTP15	DAM pan-cancer core fitness	Hart 2017	NA	NA	NA
UTP20	DAM pan-cancer core fitness	Hart 2017	NA	NA	NA
UTP23	NA	Hart 2017	NA	NA	NA
UXT	DAM pan-cancer core fitness	Hart 2017	NA	NA	NA
VARS	DAM pan-cancer core fitness	Hart 2017	Achilles	204 hybrid genes	NA
VARS2	NA	Hart 2017	NA	NA	NA
VCP	DAM pan-cancer core fitness	Hart 2017	NA	NA	NA
VDAC2	NA	NA	NA	204 hybrid genes	NA
VPS25	DAM pan-cancer core fitness	Hart 2017	NA	NA	NA
VPS28	DAM pan-cancer core fitness	Hart 2017	NA	NA	NA
WARS	DAM pan-cancer core fitness	Hart 2017	NA	NA	NA
WBSCR22	DAM pan-cancer core fitness	Hart 2017	NA	NA	NA
WDR12	DAM pan-cancer core fitness	Hart 2017	NA	NA	NA
WDR25	NA	Hart 2017	NA	NA	NA
WDR3	NA	Hart 2017	Achilles	204 hybrid genes	NA
WDR33	DAM pan-cancer core fitness	Hart 2017	NA	NA	NA
WDR36	NA	NA	NA	204 hybrid genes	42 tumor associated genes
WDR43	DAM pan-cancer core fitness	Hart 2017	NA	NA	NA
WDR61	NA	Hart 2017	NA	NA	NA
WDR70	DAM pan-cancer core fitness	Hart 2017	NA	NA	NA
WDR74	NA	Hart 2017	NA	NA	NA
WDR75	DAM pan-cancer core fitness	Hart 2017	NA	NA	NA
WDR77	NA	Hart 2017	NA	NA	NA
WDR92	NA	Hart 2017	NA	NA	NA
WEE1	DAM pan-cancer core fitness	Hart 2017	NA	NA	NA
XAB2	DAM pan-cancer core fitness	Hart 2017	NA	NA	NA
XPG	NA	NA	NA	204 hybrid genes	NA
XPO1	NA	Hart 2017	NA	NA	NA
XRCC6	DAM pan-cancer core fitness	Hart 2017	NA	NA	NA
XRN2	NA	NA	Achilles	204 hybrid genes	42 tumor associated genes
YARS	DAM pan-cancer core fitness	Hart 2017	NA	NA	NA
YARS2	NA	Hart 2017	NA	NA	NA
YBX1	DAM pan-cancer core fitness	NA	NA	204 hybrid genes	NA
YRDC	NA	Hart 2017	NA	NA	NA
ZBTB8OS	NA	Hart 2017	NA	NA	NA
ZC3H11A	NA	NA	NA	204 hybrid genes	NA
ZC3H15	NA	NA	NA	204 hybrid genes	42 tumor associated genes
ZC3HAV1	NA	NA	NA	204 hybrid genes	NA
ZFR	NA	NA	NA	204 hybrid genes	NA
ZMAT5	NA	Hart 2017	NA	NA	NA
ZNF131	NA	Hart 2017	NA	NA	NA
ZNF207	NA	NA	Achilles	204 hybrid genes	NA
ZNF259	NA	Hart 2017	NA	NA	NA
ZNF574	NA	Hart 2017	NA	NA	NA
NA	DAM pan-cancer core fitness	NA	NA	NA	NA
NA	DAM pan-cancer core fitness	NA	NA	NA	NA
NA	DAM pan-cancer core fitness	NA	NA	NA	NA
NA	DAM pan-cancer core fitness	NA	NA	NA	NA
NA	DAM pan-cancer core fitness	NA	NA	NA	NA
NA	DAM pan-cancer core fitness	NA	NA	NA	NA
NA	DAM pan-cancer core fitness	NA	NA	NA	NA
NA	DAM pan-cancer core fitness	NA	NA	NA	NA
NA	DAM pan-cancer core fitness	NA	NA	NA	NA
NA	DAM pan-cancer core fitness	NA	NA	NA	NA
NA	DAM pan-cancer core fitness	NA	NA	NA	NA
NA	DAM pan-cancer core fitness	NA	NA	NA	NA
NA	DAM pan-cancer core fitness	NA	NA	NA	NA
NA	DAM pan-cancer core fitness	NA	NA	NA	NA
NA	DAM pan-cancer core fitness	NA	NA	NA	NA
NA	DAM pan-cancer core fitness	NA	NA	NA	NA
NA	DAM pan-cancer core fitness	NA	NA	NA	NA
NA	DAM pan-cancer core fitness	NA	NA	NA	NA
NA	DAM pan-cancer core fitness	NA	NA	NA	NA
NA	DAM pan-cancer core fitness	NA	NA	NA	NA
NA	DAM pan-cancer core fitness	NA	NA	NA	NA
NA	DAM pan-cancer core fitness	NA	NA	NA	NA
NA	DAM pan-cancer core fitness	NA	NA	NA	NA
NA	DAM pan-cancer core fitness	NA	NA	NA	NA
NA	DAM pan-cancer core fitness	NA	NA	NA	NA
NA	DAM pan-cancer core fitness	NA	NA	NA	NA
NA	DAM pan-cancer core fitness	NA	NA	NA	NA
NA	DAM pan-cancer core fitness	NA	NA	NA	NA
NA	DAM pan-cancer core fitness	NA	NA	NA	NA
NA	DAM pan-cancer core fitness	NA	NA	NA	NA
NA	DAM pan-cancer core fitness	NA	NA	NA	NA
NA	DAM pan-cancer core fitness	NA	NA	NA	NA
NA	DAM pan-cancer core fitness	NA	NA	NA	NA
NA	DAM pan-cancer core fitness	NA	NA	NA	NA
NA	DAM pan-cancer core fitness	NA	NA	NA	NA
NA	DAM pan-cancer core fitness	NA	NA	NA	NA
NA	DAM pan-cancer core fitness	NA	NA	NA	NA
NA	DAM pan-cancer core fitness	NA	NA	NA	NA
NA	DAM pan-cancer core fitness	NA	NA	NA	NA
NA	DAM pan-cancer core fitness	NA	NA	NA	NA
NA	DAM pan-cancer core fitness	NA	NA	NA	NA
NA	DAM pan-cancer core fitness	NA	NA	NA	NA
NA	DAM pan-cancer core fitness	NA	NA	NA	NA
NA	DAM pan-cancer core fitness	NA	NA	NA	NA
NA	DAM pan-cancer core fitness	NA	NA	NA	NA
NA	DAM pan-cancer core fitness	NA	NA	NA	NA
NA	DAM pan-cancer core fitness	NA	NA	NA	NA
NA	DAM pan-cancer core fitness	NA	NA	NA	NA
NA	DAM pan-cancer core fitness	NA	NA	NA	NA
NA	DAM pan-cancer core fitness	NA	NA	NA	NA
NA	DAM pan-cancer core fitness	NA	NA	NA	NA
NA	DAM pan-cancer core fitness	NA	NA	NA	NA
NA	DAM pan-cancer core fitness	NA	NA	NA	NA
NA	DAM pan-cancer core fitness	NA	NA	NA	NA
NA	DAM pan-cancer core fitness	NA	NA	NA	NA
NA	DAM pan-cancer core fitness	NA	NA	NA	NA
NA	DAM pan-cancer core fitness	NA	NA	NA	NA
NA	DAM pan-cancer core fitness	NA	NA	NA	NA
NA	DAM pan-cancer core fitness	NA	NA	NA	NA
NA	DAM pan-cancer core fitness	NA	NA	NA	NA
NA	DAM pan-cancer core fitness	NA	NA	NA	NA
NA	DAM pan-cancer core fitness	NA	NA	NA	NA
NA	DAM pan-cancer core fitness	NA	NA	NA	NA
NA	DAM pan-cancer core fitness	NA	NA	NA	NA
NA	DAM pan-cancer core fitness	NA	NA	NA	NA
NA	DAM pan-cancer core fitness	NA	NA	NA	NA
NA	DAM pan-cancer core fitness	NA	NA	NA	NA
NA	DAM pan-cancer core fitness	NA	NA	NA	NA
NA	DAM pan-cancer core fitness	NA	NA	NA	NA
NA	DAM pan-cancer core fitness	NA	NA	NA	NA
NA	DAM pan-cancer core fitness	NA	NA	NA	NA
NA	DAM pan-cancer core fitness	NA	NA	NA	NA
NA	DAM pan-cancer core fitness	NA	NA	NA	NA
NA	DAM pan-cancer core fitness	NA	NA	NA	NA
NA	DAM pan-cancer core fitness	NA	NA	NA	NA
NA	DAM pan-cancer core fitness	NA	NA	NA	NA
NA	DAM pan-cancer core fitness	NA	NA	NA	NA
NA	DAM pan-cancer core fitness	NA	NA	NA	NA
NA	DAM pan-cancer core fitness	NA	NA	NA	NA
NA	DAM pan-cancer core fitness	NA	NA	NA	NA
NA	DAM pan-cancer core fitness	NA	NA	NA	NA
NA	DAM pan-cancer core fitness	NA	NA	NA	NA
NA	DAM pan-cancer core fitness	NA	NA	NA	NA
NA	DAM pan-cancer core fitness	NA	NA	NA	NA
NA	DAM pan-cancer core fitness	NA	NA	NA	NA
NA	DAM pan-cancer core fitness	NA	NA	NA	NA
NA	DAM pan-cancer core fitness	NA	NA	NA	NA
NA	DAM pan-cancer core fitness	NA	NA	NA	NA
NA	DAM pan-cancer core fitness	NA	NA	NA	NA
NA	DAM pan-cancer core fitness	NA	NA	NA	NA
NA	DAM pan-cancer core fitness	NA	NA	NA	NA
NA	DAM pan-cancer core fitness	NA	NA	NA	NA
NA	DAM pan-cancer core fitness	NA	NA	NA	NA
NA	DAM pan-cancer core fitness	NA	NA	NA	NA
NA	DAM pan-cancer core fitness	NA	NA	NA	NA
NA	DAM pan-cancer core fitness	NA	NA	NA	NA
NA	DAM pan-cancer core fitness	NA	NA	NA	NA
NA	DAM pan-cancer core fitness	NA	NA	NA	NA
NA	DAM pan-cancer core fitness	NA	NA	NA	NA
NA	DAM pan-cancer core fitness	NA	NA	NA	NA
NA	DAM pan-cancer core fitness	NA	NA	NA	NA
NA	DAM pan-cancer core fitness	NA	NA	NA	NA
NA	DAM pan-cancer core fitness	NA	NA	NA	NA
NA	DAM pan-cancer core fitness	NA	NA	NA	NA
NA	DAM pan-cancer core fitness	NA	NA	NA	NA
NA	DAM pan-cancer core fitness	NA	NA	NA	NA
NA	DAM pan-cancer core fitness	NA	NA	NA	NA
NA	DAM pan-cancer core fitness	NA	NA	NA	NA
NA	DAM pan-cancer core fitness	NA	NA	NA	NA
NA	DAM pan-cancer core fitness	NA	NA	NA	NA
NA	DAM pan-cancer core fitness	NA	NA	NA	NA
NA	DAM pan-cancer core fitness	NA	NA	NA	NA
NA	DAM pan-cancer core fitness	NA	NA	NA	NA
NA	DAM pan-cancer core fitness	NA	NA	NA	NA
NA	DAM pan-cancer core fitness	NA	NA	NA	NA
NA	DAM pan-cancer core fitness	NA	NA	NA	NA
NA	DAM pan-cancer core fitness	NA	NA	NA	NA
NA	DAM pan-cancer core fitness	NA	NA	NA	NA
NA	DAM pan-cancer core fitness	NA	NA	NA	NA
NA	DAM pan-cancer core fitness	NA	NA	NA	NA
NA	DAM pan-cancer core fitness	NA	NA	NA	NA
NA	DAM pan-cancer core fitness	NA	NA	NA	NA
NA	DAM pan-cancer core fitness	NA	NA	NA	NA
NA	DAM pan-cancer core fitness	NA	NA	NA	NA
NA	DAM pan-cancer core fitness	NA	NA	NA	NA
NA	DAM pan-cancer core fitness	NA	NA	NA	NA
NA	DAM pan-cancer core fitness	NA	NA	NA	NA
NA	DAM pan-cancer core fitness	NA	NA	NA	NA
NA	DAM pan-cancer core fitness	NA	NA	NA	NA
NA	DAM pan-cancer core fitness	NA	NA	NA	NA
NA	DAM pan-cancer core fitness	NA	NA	NA	NA
