# Supplementary material for: The Association of R-Loop Binding Proteins Subtypes with CIN Implicates Therapeutic Strategies in Colorectal Cancer
Source: Cancers (Basel). 2022 Nov 15;14(22):5607. doi: 10.3390/cancers14225607 (PMC9688457; doi:10.3390/cancers14225607)
Supplement: Supplementary file 1 [file cancers-14-05607-s001.zip › Table S6.xlsx]

## Sheet: Description
Table S6: The Drug sensitivity analysis in cells with DDX21 expressions. Related to Figure 6 and S7.
Sheet	Description
Table S6a	DDX21 proteins expression divided by median or quantile correlated with drug sensitivity.

## Sheet: Table S6a
DRUG_NAME	p value_median	fdr_BH	fdr	fcSR	meanC1	meanC2	fcSR2	medianC1	medianC2	type	p value_quantile	fdr_BH	fdr	fcSR	meanC1	meanC2	fcSR2	medianC1	medianC2	type	PUTATIVE_TARGET	PATHWAY_NAME
(5Z)-7-Oxozeaenol	0.810042	0.971638	0.971638	0.527888	0.373219	0.901107	-0.0373335	0.465683	0.42835	DDX21_EXPRESSION_median	0.955089	0.980672	0.980672	0.114106	0.083827	0.197933	0.128395	-0.010835	0.11756	DDX21_quantile	TAK1	Other, kinases
5-Fluorouracil	0.820139	0.971638	0.971638	NA	NA	2.92075	NA	NA	2.52509	DDX21_EXPRESSION_median	0.955089	0.980672	0.980672	-0.0433464	2.63477	2.59142	-0.176781	2.42593	2.24915	DDX21_quantile	Antimetabolite (DNA & RNA)	Other
A-443654	0.857143	0.971638	0.971638	NA	NA	NA	NA	NA	NA	DDX21_EXPRESSION_median	0.857143	0.949036	0.949036	NA	NA	NA	NA	NA	NA	DDX21_quantile	AKT1, AKT2, AKT3	PI3K/MTOR signaling
A-770041	0.857143	0.971638	0.971638	NA	NA	NA	NA	NA	NA	DDX21_EXPRESSION_median	0.857143	0.949036	0.949036	NA	NA	NA	NA	NA	NA	DDX21_quantile	LCK, FYN	Other, kinases
A-83-01	0.391812	0.84983	0.84983	NA	NA	4.30538	NA	NA	4.17281	DDX21_EXPRESSION_median	0.0938617	0.425002	0.425002	-0.811701	4.99365	4.18195	-0.605329	4.6864	4.08107	DDX21_quantile	TGFB	Other
ACY-1215	0.30312	0.84983	0.84983	NA	NA	2.13804	NA	NA	1.90377	DDX21_EXPRESSION_median	0.0400932	0.406828	0.406828	-0.760208	2.75329	1.99309	-0.442576	2.27337	1.83079	DDX21_quantile	HDAC6	Chromatin histone acetylation
Afatinib	0.503319	0.890488	0.890488	-0.379232	2.49662	2.11739	0.290304	2.14095	2.43126	DDX21_EXPRESSION_median	0.231857	0.56731	0.56731	-0.689068	2.65683	1.96776	-0.0359	2.23579	2.19989	DDX21_quantile	ERBB2, EGFR	EGFR signaling
AGI-6780	0.690511	0.923358	0.923358	NA	NA	1.82716	NA	NA	1.85078	DDX21_EXPRESSION_median	0.0289044	0.406828	0.406828	-0.558749	2.18973	1.63099	-0.432274	1.98209	1.54982	DDX21_quantile	IDH2(R140Q)	Metabolism
AICA Ribonucleotide	0.247091	0.84983	0.84983	-0.392194	8.51471	8.12252	-0.289774	8.34959	8.05981	DDX21_EXPRESSION_median	0.53582	0.81078	0.81078	-0.365272	8.30168	7.9364	-0.369934	8.26819	7.89826	DDX21_quantile	AMPK agonist	Metabolism
AKT inhibitor VIII	0.954685	0.992068	0.992068	NA	NA	2.68238	NA	NA	2.43288	DDX21_EXPRESSION_median	0.612587	0.853768	0.853768	-0.457525	2.75375	2.29623	0.0027205	2.37302	2.37574	DDX21_quantile	AKT1, AKT2, AKT3	PI3K/MTOR signaling
Alectinib	0.0183571	0.84983	0.84983	NA	NA	3.43569	NA	NA	3.49688	DDX21_EXPRESSION_median	0.0289044	0.406828	0.406828	-1.29287	4.3266	3.03373	-0.705534	4.07488	3.36934	DDX21_quantile	ALK	RTK signaling
Alisertib	0.530912	0.896325	0.896325	NA	NA	1.23604	NA	NA	1.70681	DDX21_EXPRESSION_median	0.0721057	0.425002	0.425002	-1.57893	1.89308	0.314155	-1.86229	2.07936	0.217065	DDX21_quantile	AURKA	Mitosis
Amuvatinib	0.149964	0.84983	0.84983	NA	NA	4.07633	NA	NA	4.22754	DDX21_EXPRESSION_median	1	1	1	0.0879959	3.50862	3.59662	-0.170741	4.1327	3.96196	DDX21_quantile	KIT, PDGFRA, FLT3	RTK signaling
Apitolisib	0.30312	0.84983	0.84983	NA	NA	1.33557	NA	NA	1.04439	DDX21_EXPRESSION_median	0.396892	0.700508	0.700508	0.430758	0.692535	1.12329	0.498514	0.37122	0.869734	DDX21_quantile	mTOR, PI3K	PI3K/MTOR signaling
AR-42	0.115063	0.84983	0.84983	NA	NA	-0.824323	NA	NA	-0.754276	DDX21_EXPRESSION_median	0.029304	0.406828	0.406828	NA	NA	-1.00838	NA	NA	-0.965758	DDX21_quantile	HDAC1	Chromatin histone acetylation
Ara-G	0.149964	0.84983	0.84983	NA	NA	5.57466	NA	NA	5.64658	DDX21_EXPRESSION_median	0.151981	0.499367	0.499367	-0.473377	5.92063	5.44725	-0.327135	5.73993	5.41279	DDX21_quantile	Anti-metabolite	Other
ARRY-520	0.648978	0.896325	0.896325	NA	NA	-3.00467	NA	NA	-3.69422	DDX21_EXPRESSION_median	0.189277	0.548745	0.548745	-1.83601	-2.14659	-3.98259	-2.09198	-1.91252	-4.0045	DDX21_quantile	KIF11	Mitosis
AS601245	0.365308	0.84983	0.84983	NA	NA	NA	NA	NA	NA	DDX21_EXPRESSION_median	0.151981	0.499367	0.499367	-1.20836	3.21066	2.0023	-1.41173	3.35259	1.94086	DDX21_quantile	JNK1, JNK2, JNK2	JNK and p38 signaling
AS605240	0.909511	0.986733	0.986733	NA	NA	3.05704	NA	NA	2.93518	DDX21_EXPRESSION_median	0.694328	0.890495	0.890495	-0.240473	3.6711	3.43063	-0.78162	4.36016	3.57854	DDX21_quantile	PI3Kgamma	PI3K/MTOR signaling
AST-1306	0.16741	0.84983	0.84983	NA	NA	1.87291	NA	NA	2.24352	DDX21_EXPRESSION_median	0.0938617	0.425002	0.425002	-1.62533	3.35879	1.73346	-0.971221	3.25531	2.28409	DDX21_quantile	EGFR, ERBB4	RTK signaling
AT-7519	0.0933071	0.84983	0.84983	NA	NA	1.02531	NA	NA	1.1495	DDX21_EXPRESSION_median	0.0938617	0.425002	0.425002	-1.74018	2.60634	0.866157	-1.8694	2.36728	0.497874	DDX21_quantile	CDK1, CDK2, CDK4, CDK6, CDK9	Cell cycle
AT7867	0.776211	0.94962	0.94962	NA	NA	4.10047	NA	NA	4.03858	DDX21_EXPRESSION_median	0.955089	0.980672	0.980672	-0.11305	3.71091	3.59786	-0.257026	3.69632	3.4393	DDX21_quantile	AKT	PI3K/MTOR signaling
Avagacestat	0.109548	0.84983	0.84983	-0.369252	4.40879	4.03953	-0.320425	4.29158	3.97116	DDX21_EXPRESSION_median	0.0721057	0.425002	0.425002	-0.576896	4.36019	3.78329	-0.333896	4.24065	3.90675	DDX21_quantile	Amyloid beta20, Amyloid beta40	Other
Axitinib	0.37602	0.84983	0.84983	-0.645251	2.85236	2.20711	-0.583893	2.90368	2.31978	DDX21_EXPRESSION_median	0.335664	0.681201	0.681201	-0.99277	2.60331	1.61054	-0.460016	2.58059	2.12058	DDX21_quantile	PDGFR, KIT, VEGFR	RTK signaling
AZ20	0.270124	0.84983	0.84983	-0.456385	1.90665	1.45027	-0.489399	1.96056	1.47116	DDX21_EXPRESSION_median	0.120591	0.452214	0.452214	-0.847479	1.53337	0.685894	-0.858824	1.37289	0.514067	DDX21_quantile	ATR	Genome integrity
AZ628	0.4	0.84983	0.84983	NA	NA	NA	NA	NA	NA	DDX21_EXPRESSION_median	0.4	0.700508	0.700508	NA	NA	NA	NA	NA	NA	DDX21_quantile	BRAF	ERK MAPK signaling
AZD1208	0.320322	0.84983	0.84983	-0.344506	4.2828	3.9383	-0.104479	4.11226	4.00779	DDX21_EXPRESSION_median	0.231857	0.56731	0.56731	-0.68379	4.3289	3.64511	-0.470984	4.09476	3.62378	DDX21_quantile	PIM1, PIM2, PIM3	Other, kinases
AZD1332	0.122518	0.84983	0.84983	-1.0283	2.92282	1.89452	-0.696453	2.7662	2.06975	DDX21_EXPRESSION_median	0.0400932	0.406828	0.406828	-1.65113	2.78334	1.13221	-0.695297	2.33836	1.64307	DDX21_quantile	NTRK1, NTRK2, NTRK3	RTK signaling
AZD1480	0.205087	0.84983	0.84983	-0.859055	2.62472	1.76566	-0.969731	2.98583	2.0161	DDX21_EXPRESSION_median	0.0938617	0.425002	0.425002	-1.59928	2.60081	1.00153	-1.44941	3.0419	1.59248	DDX21_quantile	JAK1, JAK2	Other, kinases
AZD2014	0.18607	0.84983	0.84983	0.822426	0.318395	1.14082	0.614495	0.218579	0.833074	DDX21_EXPRESSION_median	0.335664	0.681201	0.681201	0.392992	-0.0798613	0.313131	0.157391	-0.123242	0.0341495	DDX21_quantile	mTORC1, mTORC2	PI3K/MTOR signaling
AZD3514	0.18607	0.84983	0.84983	-0.451865	3.85177	3.3999	-0.670479	3.8467	3.17622	DDX21_EXPRESSION_median	0.0540793	0.425002	0.425002	-1.142	4.20319	3.06119	-1.45295	4.2461	2.79314	DDX21_quantile	AR	Hormone-related
AZD4547	0.688522	0.923358	0.923358	-0.687616	3.2724	2.58479	-0.233433	3.376	3.14256	DDX21_EXPRESSION_median	0.396892	0.700508	0.700508	-1.34796	3.30289	1.95493	-0.131619	3.17333	3.04171	DDX21_quantile	FGRF1, FGFR2, FGFR3	RTK signaling
AZD4547	0.688522	0.923358	0.923358	-0.687616	3.2724	2.58479	-0.233433	3.376	3.14256	DDX21_EXPRESSION_median	0.396892	0.700508	0.700508	-1.34796	3.30289	1.95493	-0.131619	3.17333	3.04171	DDX21_quantile	FGFR1, FGFR2, FGFR3	RTK signaling
AZD4877	0.469594	0.866363	0.866363	-0.574145	-2.70615	-3.28029	-1.04136	-2.88748	-3.92884	DDX21_EXPRESSION_median	0.335664	0.681201	0.681201	-1.39911	-2.67904	-4.07815	-1.55666	-2.67116	-4.22782	DDX21_quantile	EG5	Mitosis
AZD5438	0.611412	0.896325	0.896325	-0.110189	1.0945	0.984306	-0.532145	1.33739	0.805246	DDX21_EXPRESSION_median	0.120591	0.452214	0.452214	-0.538719	0.900006	0.361287	-0.916717	0.914152	-0.0025655	DDX21_quantile	CDK2	Cell cycle
AZD5582	0.40951	0.84983	0.84983	NA	3.36323	NA	NA	3.2831	NA	DDX21_EXPRESSION_median	0.710373	0.904349	0.904349	NA	3.39732	NA	NA	3.25761	NA	DDX21_quantile	IAP	Other
AZD6094	0.320322	0.84983	0.84983	-0.222853	3.69242	3.46957	-0.254092	3.6579	3.40381	DDX21_EXPRESSION_median	0.280963	0.621362	0.621362	-0.462021	3.71064	3.24862	-0.263881	3.5725	3.30862	DDX21_quantile	MET	RTK signaling
AZD6482	0.405904	0.84983	0.84983	-0.427222	3.5911	3.16388	-0.213089	3.57104	3.35795	DDX21_EXPRESSION_median	0.189277	0.548745	0.548745	-0.680888	3.53873	2.85784	-0.512884	3.51316	3.00027	DDX21_quantile	PI3Kbeta	PI3K/MTOR signaling
AZD6738	0.347493	0.84983	0.84983	-0.498993	2.77004	2.27104	-0.896089	2.90739	2.0113	DDX21_EXPRESSION_median	0.231857	0.56731	0.56731	-0.860176	2.59866	1.73849	-1.24353	2.86939	1.62586	DDX21_quantile	ATR	Genome integrity
AZD7762	0.0976424	0.84983	0.84983	-0.555921	0.576178	0.0202567	-1.12376	0.672247	-0.451511	DDX21_EXPRESSION_median	0.120591	0.452214	0.452214	-0.585378	0.38318	-0.202198	-0.979949	0.481787	-0.498162	DDX21_quantile	CHEK1, CHEK2	Cell cycle
AZD7969	0.320322	0.84983	0.84983	-0.60154	3.00742	2.40588	-0.808146	3.08061	2.27246	DDX21_EXPRESSION_median	0.53582	0.81078	0.81078	-0.672929	2.47468	1.80175	-0.58079	2.21046	1.62967	DDX21_quantile	GSK3B	WNT signaling
AZD8055	0.437102	0.84983	0.84983	0.268855	0.57039	0.839246	0.266058	0.127548	0.393605	DDX21_EXPRESSION_median	0.955089	0.980672	0.980672	-0.32079	0.539773	0.218983	0.0138355	-0.011478	0.0023575	DDX21_quantile	MTORC1, MTORC2	PI3K/MTOR signaling
AZD8186	0.649511	0.896325	0.896325	0.192871	2.56798	2.76085	0.395761	2.47071	2.86647	DDX21_EXPRESSION_median	0.866511	0.949036	0.949036	-0.0137513	2.46369	2.44994	0.363197	2.24816	2.61136	DDX21_quantile	PI3Kbeta, PI3Kdelta	PI3K/MTOR signaling
AZD8835	0.611412	0.896325	0.896325	0.460358	2.2285	2.68885	-0.016394	2.29675	2.28035	DDX21_EXPRESSION_median	0.778866	0.939541	0.939541	0.363517	1.97726	2.34078	0.014661	2.21978	2.23444	DDX21_quantile	PI3Kalpha, PI3Kdelta	PI3K/MTOR signaling
AZD8931	0.936162	0.992068	0.992068	-0.218514	2.05642	1.83791	0.171954	1.81153	1.98348	DDX21_EXPRESSION_median	0.396892	0.700508	0.700508	-0.728376	1.95694	1.22857	-0.056473	1.37732	1.32085	DDX21_quantile	EGFR, ERBB2, ERBB3	RTK signaling
BAM7	0.909511	0.986733	0.986733	NA	NA	5.24096	NA	NA	5.25614	DDX21_EXPRESSION_median	0.694328	0.890495	0.890495	0.159136	4.93708	5.09621	0.349483	4.88214	5.23162	DDX21_quantile	Bax activator	Other
BAY-61-3606	0.561888	0.896325	0.896325	NA	NA	NA	NA	NA	NA	DDX21_EXPRESSION_median	0.151981	0.499367	0.499367	-1.11855	3.0975	1.97895	-1.05911	2.58176	1.52265	DDX21_quantile	SYK	Other, kinases
Belinostat	0.0882939	0.84983	0.84983	NA	NA	-0.416752	NA	NA	-0.577542	DDX21_EXPRESSION_median	0.01998	0.406828	0.406828	NA	NA	-0.657917	NA	NA	-0.739664	DDX21_quantile	HDAC1	Chromatin histone acetylation
Bexarotene	0.216945	0.84983	0.84983	NA	NA	NA	NA	NA	NA	DDX21_EXPRESSION_median	0.0721057	0.425002	0.425002	-0.883121	4.33224	3.44912	-1.01407	4.6303	3.61623	DDX21_quantile	Retinioic X receptor (RXR) agonist	Other
BI-2536	0.628571	0.896325	0.896325	NA	NA	NA	NA	NA	NA	DDX21_EXPRESSION_median	0.628571	0.853768	0.853768	NA	NA	NA	NA	NA	NA	DDX21_quantile	PLK1, PLK2, PLK3	Cell cycle
BIBF-1120	0.331136	0.84983	0.84983	NA	NA	2.91913	NA	NA	3.07857	DDX21_EXPRESSION_median	0.280963	0.621362	0.621362	-0.980012	3.70193	2.72192	-0.971096	4.01562	3.04452	DDX21_quantile	VEGFR, PDGFR, FGFR	RTK signaling
Bicalutamide	0.168349	0.84983	0.84983	0.467487	3.52448	3.99197	0.585321	3.42084	4.00616	DDX21_EXPRESSION_median	0.866511	0.949036	0.949036	0.0993451	3.46631	3.56565	-0.214196	3.65711	3.44291	DDX21_quantile	AR	Hormone-related
BIX02189	0.648978	0.896325	0.896325	NA	NA	4.54656	NA	NA	4.88823	DDX21_EXPRESSION_median	0.866511	0.949036	0.949036	-0.257113	4.47388	4.21677	0.101392	4.31924	4.42063	DDX21_quantile	MEK5, ERK5	ERK MAPK signaling
Bleomycin	0.948729	0.992068	0.992068	NA	NA	NA	NA	NA	NA	DDX21_EXPRESSION_median	0.955089	0.980672	0.980672	0.0365775	1.9306	1.96718	-1.61863	3.01733	1.3987	DDX21_quantile	dsDNA break induction	DNA replication
Bleomycin (10 uM)	0.405904	0.84983	0.84983	0.587453	2.11631	2.70376	1.43477	1.48429	2.91906	DDX21_EXPRESSION_median	0.280963	0.621362	0.621362	0.779026	1.37188	2.1509	2.07206	0.748683	2.82074	DDX21_quantile	dsDNA break induction	DNA replication
Bleomycin (50 uM)	0.611412	0.896325	0.896325	0.311014	2.88838	3.1994	0.692152	2.45941	3.15156	DDX21_EXPRESSION_median	0.463403	0.736747	0.736747	0.101741	2.33099	2.43273	1.37386	1.70762	3.08148	DDX21_quantile	dsDNA break induction	DNA replication
BMS-345541	0.206602	0.84983	0.84983	NA	NA	2.93712	NA	NA	2.67667	DDX21_EXPRESSION_median	0.0938617	0.425002	0.425002	-0.863167	3.38599	2.52282	-1.28171	3.55932	2.27761	DDX21_quantile	IKK1, IKK2	Other, kinases
BMS-509744	0.4	0.84983	0.84983	NA	NA	NA	NA	NA	NA	DDX21_EXPRESSION_median	0.4	0.700508	0.700508	NA	NA	NA	NA	NA	NA	DDX21_quantile	ITK	Other, kinases
BMS-536924	0.893791	0.986733	0.986733	-0.0302747	1.81667	1.7864	0.339263	1.72558	2.06484	DDX21_EXPRESSION_median	0.231857	0.56731	0.56731	-0.684433	1.84614	1.16171	-0.437893	1.45548	1.01759	DDX21_quantile	IGF1R, IR	IGF1R signaling
BMS-754807	0.747658	0.94962	0.94962	NA	NA	NA	NA	NA	NA	DDX21_EXPRESSION_median	0.612587	0.853768	0.853768	0.427004	-0.158039	0.268966	0.878278	-0.524821	0.353457	DDX21_quantile	IGF1R, IR	RTK signaling
Bortezomib	0.857143	0.971638	0.971638	NA	NA	NA	NA	NA	NA	DDX21_EXPRESSION_median	0.857143	0.949036	0.949036	NA	NA	NA	NA	NA	NA	DDX21_quantile	Proteasome	Protein stability and degradation
Bosutinib	0.0457112	0.84983	0.84983	-0.84536	2.68456	1.8392	-1.15688	3.15819	2.0013	DDX21_EXPRESSION_median	0.0938617	0.425002	0.425002	-0.88392	2.6331	1.74918	-1.26408	3.13487	1.87079	DDX21_quantile	SRC, ABL, TEC	Other, kinases
BPTES	0.768887	0.94962	0.94962	-0.0730872	4.3491	4.27601	0.501163	4.31202	4.81318	DDX21_EXPRESSION_median	0.396892	0.700508	0.700508	-0.595259	4.51393	3.91867	-0.204497	4.32138	4.11688	DDX21_quantile	GLS	Other
Brivanib, BMS-540215	0.331136	0.84983	0.84983	NA	NA	4.63385	NA	NA	4.59068	DDX21_EXPRESSION_median	0.00932401	0.402098	0.402098	-1.16216	5.14237	3.98022	-0.807508	5.11684	4.30934	DDX21_quantile	VEGFR, PDGFR	RTK signaling
Bryostatin 1	0.242648	0.84983	0.84983	NA	NA	NA	NA	NA	NA	DDX21_EXPRESSION_median	0.778866	0.939541	0.939541	-0.153749	-2.45247	-2.60622	0.325275	-2.63576	-2.31048	DDX21_quantile	PKC	Other
BX-912	0.648978	0.896325	0.896325	NA	NA	2.94224	NA	NA	3.43377	DDX21_EXPRESSION_median	0.0938617	0.425002	0.425002	-1.46554	3.5283	2.06276	-2.05781	3.43648	1.37868	DDX21_quantile	PDK1 (PDPK1)	Metabolism
BX795	0.538245	0.896325	0.896325	-0.267866	2.87051	2.60264	-0.887397	3.06237	2.17497	DDX21_EXPRESSION_median	0.151981	0.499367	0.499367	-0.679094	2.51479	1.83569	-0.814024	2.56822	1.7542	DDX21_quantile	TBK1, PDK1 (PDPK1), IKK, AURKB, AURKC	Other, kinases
C-75	0.105614	0.84983	0.84983	NA	NA	5.24094	NA	NA	5.3661	DDX21_EXPRESSION_median	0.0037296	0.402098	0.402098	-1.22707	6.01026	4.78319	-0.933979	5.83214	4.89816	DDX21_quantile	FAS	Apoptosis regulation
Cabozantinib	0.251772	0.84983	0.84983	NA	NA	2.79121	NA	NA	2.63202	DDX21_EXPRESSION_median	0.0938617	0.425002	0.425002	-0.990108	3.32345	2.33334	-0.760096	2.9016	2.1415	DDX21_quantile	VEGFR, MET, RET, KIT, FLT1, FLT3, FLT4, TIE2,AXL	RTK signaling
CAP-232, TT-232, TLN-232	0.648978	0.896325	0.896325	NA	NA	4.52961	NA	NA	4.29087	DDX21_EXPRESSION_median	0.612587	0.853768	0.853768	0.243829	4.12028	4.36411	1.04792	3.13232	4.18023	DDX21_quantile	Glycolysis	Metabolism
Capivasertib	0.851719	0.971638	0.971638	0.188127	3.79026	3.97839	0.797273	3.8127	4.60997	DDX21_EXPRESSION_median	0.955089	0.980672	0.980672	-0.0141775	3.2105	3.19632	0.126668	2.8301	2.95677	DDX21_quantile	AKT	PI3K/MTOR signaling
CAY10566	0.458521	0.862042	0.862042	NA	NA	2.64565	NA	NA	2.68005	DDX21_EXPRESSION_median	0.778866	0.939541	0.939541	0.964514	1.31978	2.28429	1.05316	1.48496	2.53812	DDX21_quantile	Stearoyl-CoA desaturase	Other
CAY10603	0.0933071	0.84983	0.84983	NA	NA	0.516283	NA	NA	0.168706	DDX21_EXPRESSION_median	0.0289044	0.406828	0.406828	-1.02735	1.26045	0.233099	-1.17917	1.33843	0.159261	DDX21_quantile	HDAC1, HDAC6	Chromatin histone acetylation
CCT-018159	0.405904	0.84983	0.84983	-0.507862	3.93744	3.42958	-0.849057	4.06414	3.21508	DDX21_EXPRESSION_median	0.463403	0.736747	0.736747	-0.954124	3.75203	2.79791	-0.551597	3.38025	2.82865	DDX21_quantile	HSP90	Protein stability and degradation
CCT007093	0.798745	0.971638	0.971638	NA	4.36018	NA	NA	4.47132	NA	DDX21_EXPRESSION_median	0.620047	0.853768	0.853768	NA	4.00696	NA	NA	4.32879	NA	DDX21_quantile	PPM1D	Cell cycle
CD532	0.186278	0.84983	0.84983	NA	NA	0.520654	NA	NA	0.580897	DDX21_EXPRESSION_median	0.013986	0.402098	0.402098	-1.14882	1.22945	0.0806247	-1.04372	1.17508	0.131361	DDX21_quantile	AURKA	Mitosis
Cetuximab	0.312788	0.84983	0.84983	NA	NA	5.82988	NA	NA	5.88413	DDX21_EXPRESSION_median	0.107892	0.452214	0.452214	NA	NA	5.42172	NA	NA	5.8155	DDX21_quantile	EGFR	EGFR signaling
CGP-082996	1	1	1	NA	NA	NA	NA	NA	NA	DDX21_EXPRESSION_median	1	1	1	NA	NA	NA	NA	NA	NA	DDX21_quantile	CDK4	Cell cycle
CGP-60474	0.857143	0.971638	0.971638	NA	NA	NA	NA	NA	NA	DDX21_EXPRESSION_median	0.857143	0.949036	0.949036	NA	NA	NA	NA	NA	NA	DDX21_quantile	CDK1,CDK2,CDK5,CDK7,CDK9, PKC	Cell cycle
CHIR-99021	0.225414	0.84983	0.84983	-0.407503	3.95244	3.54494	-0.546731	3.99986	3.45313	DDX21_EXPRESSION_median	0.53582	0.81078	0.81078	-0.357752	3.70795	3.3502	0.042019	3.3703	3.41232	DDX21_quantile	GSK3A, GSK3B	WNT signaling
CI-1033	0.648978	0.896325	0.896325	NA	NA	2.91009	NA	NA	3.42461	DDX21_EXPRESSION_median	0.231857	0.56731	0.56731	-1.83762	4.37452	2.5369	-1.76679	5.26673	3.49994	DDX21_quantile	EGFR, ERBB2, ERBB4	RTK signaling
CI-1040	0.331136	0.84983	0.84983	NA	NA	1.57214	NA	NA	1.73294	DDX21_EXPRESSION_median	0.463403	0.736747	0.736747	0.279676	1.15852	1.43819	0.673072	0.936866	1.60994	DDX21_quantile	MEK1, MEK2	ERK MAPK signaling
Cisplatin	0.893791	0.986733	0.986733	-0.0386429	3.18504	3.14639	0.0654665	3.42894	3.49441	DDX21_EXPRESSION_median	0.955089	0.980672	0.980672	-0.097167	2.93293	2.83576	0.144168	2.69526	2.83943	DDX21_quantile	DNA crosslinker	DNA replication
CMK	0.857143	0.971638	0.971638	NA	NA	NA	NA	NA	NA	DDX21_EXPRESSION_median	0.857143	0.949036	0.949036	NA	NA	NA	NA	NA	NA	DDX21_quantile	RSK2	Other, kinases
CP466722	0.569083	0.896325	0.896325	NA	NA	2.75739	NA	NA	2.73348	DDX21_EXPRESSION_median	0.120591	0.452214	0.452214	-1.12382	3.4424	2.31858	-1.9759	3.98575	2.00985	DDX21_quantile	ATM	Genome integrity
CP724714	0.530912	0.896325	0.896325	NA	NA	4.40121	NA	NA	4.46568	DDX21_EXPRESSION_median	0.463403	0.736747	0.736747	-0.423495	4.62788	4.20439	-0.158101	4.30285	4.14475	DDX21_quantile	ERBB2	RTK signaling
CPI-613	0.251772	0.84983	0.84983	NA	NA	5.82508	NA	NA	5.5388	DDX21_EXPRESSION_median	0.013986	0.402098	0.402098	-0.569305	5.95693	5.38762	-0.340006	5.70217	5.36216	DDX21_quantile	Metabo, Mitochondria	Other
Crizotinib	0.4	0.84983	0.84983	NA	NA	NA	NA	NA	NA	DDX21_EXPRESSION_median	0.4	0.700508	0.700508	NA	NA	NA	NA	NA	NA	DDX21_quantile	MET, ALK, ROS1	RTK signaling
CUDC-101	0.0474484	0.84983	0.84983	NA	NA	-0.676136	NA	NA	-1.00645	DDX21_EXPRESSION_median	0.013986	0.402098	0.402098	-1.65778	0.769051	-0.888725	-2.0524	0.784085	-1.26831	DDX21_quantile	HDAC1-10, EGFR, ERBB2	Other
CX-5461	0.424429	0.84983	0.84983	NA	NA	2.79393	NA	NA	2.86233	DDX21_EXPRESSION_median	0.0400932	0.406828	0.406828	-1.93409	3.61607	1.68198	-2.41703	3.70098	1.28395	DDX21_quantile	RNA Polymerase 1	Other
Cyclopamine	0.857143	0.971638	0.971638	NA	NA	NA	NA	NA	NA	DDX21_EXPRESSION_median	0.857143	0.949036	0.949036	NA	NA	NA	NA	NA	NA	DDX21_quantile	SMO	Other
Cytarabine	0.60847	0.896325	0.896325	NA	NA	0.577775	NA	NA	0.367984	DDX21_EXPRESSION_median	0.694328	0.890495	0.890495	-0.486851	0.575604	0.0887535	-0.916724	0.629123	-0.2876	DDX21_quantile	Antimetabolite	Other
Dabrafenib	0.496507	0.887538	0.887538	NA	NA	NA	NA	NA	NA	DDX21_EXPRESSION_median	0.694328	0.890495	0.890495	-0.316824	3.18596	2.86914	0.0671935	3.46217	3.52936	DDX21_quantile	BRAF	ERK MAPK signaling
Dacinostat	1	1	1	NA	NA	NA	NA	NA	NA	DDX21_EXPRESSION_median	0.335664	0.681201	0.681201	-0.582883	-1.91817	-2.50106	-1.26649	-1.73202	-2.99851	DDX21_quantile	HDAC1	Chromatin histone acetylation
Dactolisib	0.405904	0.84983	0.84983	0.485824	-1.57259	-1.08677	0.410865	-1.9965	-1.58563	DDX21_EXPRESSION_median	0.866511	0.949036	0.949036	-0.0508317	-1.90984	-1.96067	0.150332	-2.10829	-1.95796	DDX21_quantile	PI3K (class 1), MTORC1, MTORC2	PI3K/MTOR signaling
Daporinad	0.747658	0.94962	0.94962	NA	NA	NA	NA	NA	NA	DDX21_EXPRESSION_median	0.710373	0.904349	0.904349	NA	-1.79757	NA	NA	-1.9424	NA	DDX21_quantile	NAMPT	Metabolism
Dasatinib	0.857143	0.971638	0.971638	NA	NA	NA	NA	NA	NA	DDX21_EXPRESSION_median	0.857143	0.949036	0.949036	NA	NA	NA	NA	NA	NA	DDX21_quantile	ABL, SRC, Ephrins, PDGFR, KIT	RTK signaling
DMOG	0.477855	0.872274	0.872274	NA	NA	NA	NA	NA	NA	DDX21_EXPRESSION_median	0.120591	0.452214	0.452214	-0.677032	7.96748	7.29045	-0.629846	8.13681	7.50696	DDX21_quantile	HIF-PH	Metabolism
Docetaxel	0.270124	0.84983	0.84983	-1.06774	-3.59005	-4.65778	-2.03479	-3.33731	-5.37211	DDX21_EXPRESSION_median	0.463403	0.736747	0.736747	-1.13983	-3.65059	-4.79042	-2.59007	-2.84412	-5.43418	DDX21_quantile	Microtubule stabiliser	Mitosis
Doramapimod	0.574293	0.896325	0.896325	-0.210319	4.78492	4.57461	-0.0624845	4.5789	4.51642	DDX21_EXPRESSION_median	0.694328	0.890495	0.890495	-0.400721	4.84508	4.44436	0.105098	4.45095	4.55604	DDX21_quantile	p38, JNK2	JNK and p38 signaling
Doxorubicin	0.611412	0.896325	0.896325	-0.141185	-0.838994	-0.980179	-0.797273	-1.12921	-1.92648	DDX21_EXPRESSION_median	0.231857	0.56731	0.56731	-0.937568	-0.377335	-1.3149	-2.30334	-0.0114175	-2.31476	DDX21_quantile	Anthracycline	DNA replication
Dyrk1b_0191	0.0596758	0.84983	0.84983	-0.635085	2.89569	2.2606	-0.364243	2.3689	2.00465	DDX21_EXPRESSION_median	0.335664	0.681201	0.681201	-0.775441	2.81113	2.03569	-0.20426	2.22472	2.02046	DDX21_quantile	DYRK1B	Other, kinases
eEF2K Inhibitor, A-484954	0.276668	0.84983	0.84983	NA	NA	5.64902	NA	NA	5.64266	DDX21_EXPRESSION_median	0.189277	0.548745	0.548745	-0.530482	5.96553	5.43505	-0.161635	5.76979	5.60816	DDX21_quantile	eEF2K	Other, kinases
EHT-1864	0.26567	0.84983	0.84983	NA	4.14096	NA	NA	4.55062	NA	DDX21_EXPRESSION_median	0.317599	0.681201	0.681201	NA	3.85356	NA	NA	4.53218	NA	DDX21_quantile	RAC1, RAC2, RAC3	Cytoskeleton
Elesclomol	0.37602	0.84983	0.84983	-1.0064	-1.06882	-2.07522	-0.582144	-1.4341	-2.01624	DDX21_EXPRESSION_median	0.866511	0.949036	0.949036	-0.599583	-1.75835	-2.35793	0.664747	-2.72492	-2.06017	DDX21_quantile	HSP90	Protein stability and degradation
Embelin	0.699353	0.931571	0.931571	NA	NA	NA	NA	NA	NA	DDX21_EXPRESSION_median	0.866511	0.949036	0.949036	-0.185446	3.43759	3.25215	-0.0782215	3.04959	2.97137	DDX21_quantile	XIAP	Apoptosis regulation
Entinostat	0.628571	0.896325	0.896325	NA	NA	NA	NA	NA	NA	DDX21_EXPRESSION_median	0.628571	0.853768	0.853768	NA	NA	NA	NA	NA	NA	DDX21_quantile	HDAC1, HDAC3	Chromatin histone acetylation
Enzastaurin	0.228426	0.84983	0.84983	NA	NA	2.43019	NA	NA	2.49385	DDX21_EXPRESSION_median	0.280963	0.621362	0.621362	-0.825166	3.18999	2.36483	-1.42121	3.81917	2.39797	DDX21_quantile	PKCB	Other, kinases
EphB4_9721	0.893791	0.986733	0.986733	-0.441323	2.90885	2.46753	0.274381	2.31693	2.59131	DDX21_EXPRESSION_median	0.778866	0.939541	0.939541	-0.702895	2.89424	2.19135	0.453879	1.97755	2.43143	DDX21_quantile	EPHB4	RTK signaling
Epothilone B	1	1	1	NA	NA	NA	NA	NA	NA	DDX21_EXPRESSION_median	0.463403	0.736747	0.736747	-0.703461	-4.47131	-5.17477	-1.41968	-4.01688	-5.43656	DDX21_quantile	Microtubule stabiliser	Mitosis
Erlotinib	0.228571	0.84983	0.84983	NA	NA	NA	NA	NA	NA	DDX21_EXPRESSION_median	0.228571	0.56731	0.56731	NA	NA	NA	NA	NA	NA	DDX21_quantile	EGFR	EGFR signaling
Etoposide	0.438463	0.84983	0.84983	NA	NA	NA	NA	NA	NA	DDX21_EXPRESSION_median	0.0721057	0.425002	0.425002	-2.18747	3.31651	1.12904	-3.15892	2.96203	-0.196897	DDX21_quantile	TOP2	DNA replication
ETP-45835	0.360704	0.84983	0.84983	NA	NA	5.513	NA	NA	5.39162	DDX21_EXPRESSION_median	0.0289044	0.406828	0.406828	-0.678325	5.81935	5.14103	-0.451811	5.6017	5.14989	DDX21_quantile	MNK1, MNK2	Other, kinases
Fedratinib	0.228426	0.84983	0.84983	NA	NA	2.17034	NA	NA	2.48639	DDX21_EXPRESSION_median	0.396892	0.700508	0.700508	-0.614081	2.53987	1.92579	-0.102223	2.37687	2.27465	DDX21_quantile	JAK2	Other, kinases
FEN1_3940	0.469594	0.866363	0.866363	-0.341538	2.97887	2.63733	-0.482368	2.65673	2.17436	DDX21_EXPRESSION_median	0.463403	0.736747	0.736747	-0.724736	2.89612	2.17139	-0.783312	2.43254	1.64923	DDX21_quantile	FEN1	Genome integrity
FGFR_0939	0.405904	0.84983	0.84983	-0.484737	2.5702	2.08547	-0.31946	2.26933	1.94988	DDX21_EXPRESSION_median	0.120591	0.452214	0.452214	-0.999833	2.65473	1.6549	-0.577455	2.17663	1.59918	DDX21_quantile	FGFR4	RTK signaling
FGFR_3831	0.893791	0.986733	0.986733	-0.282887	3.65706	3.37417	0.391658	3.69542	4.08707	DDX21_EXPRESSION_median	0.335664	0.681201	0.681201	-1.25087	3.74745	2.49658	-0.196694	3.23336	3.03666	DDX21_quantile	FGFR1, FGFR2, FGFR3, FGFR4	RTK signaling
FH535	0.171311	0.84983	0.84983	NA	NA	NA	NA	NA	NA	DDX21_EXPRESSION_median	0.0938617	0.425002	0.425002	-1.19496	3.25551	2.06055	-1.04015	2.57952	1.53937	DDX21_quantile	PPARgamma, PPARdelta	Other
Flavopiridol	0.458521	0.862042	0.862042	NA	NA	-1.03341	NA	NA	-1.10539	DDX21_EXPRESSION_median	0.231857	0.56731	0.56731	-0.736623	-0.740883	-1.47751	-0.568088	-1.0086	-1.57668	DDX21_quantile	CDK	Cell cycle
FMK	0.400923	0.84983	0.84983	NA	NA	NA	NA	NA	NA	DDX21_EXPRESSION_median	0.778866	0.939541	0.939541	-0.275523	5.0653	4.78977	-0.371596	5.2418	4.8702	DDX21_quantile	RSK	Other, kinases
Foretinib	0.0933071	0.84983	0.84983	NA	NA	0.00621592	NA	NA	-0.077547	DDX21_EXPRESSION_median	0.0938617	0.425002	0.425002	-0.878576	0.671112	-0.207465	-0.243407	-0.005838	-0.249245	DDX21_quantile	MET, KDR, TIE2, VEGFR3/FLT4, RON, PDGFR, FGFR1, EGFR	RTK signaling
FR-180204	0.424429	0.84983	0.84983	NA	NA	4.68905	NA	NA	4.62319	DDX21_EXPRESSION_median	0.866511	0.949036	0.949036	-0.190021	4.88229	4.69227	0.381565	4.36459	4.74616	DDX21_quantile	ERK1, ERK2	ERK MAPK signaling
FTI-277	0.438463	0.84983	0.84983	NA	NA	NA	NA	NA	NA	DDX21_EXPRESSION_median	0.955089	0.980672	0.980672	-0.0666601	2.21921	2.15255	-0.142436	2.41038	2.26795	DDX21_quantile	Farnesyl-transferase (FNTA)	Other
FTY-720	0.776211	0.94962	0.94962	NA	NA	2.41074	NA	NA	2.47238	DDX21_EXPRESSION_median	0.231857	0.56731	0.56731	-0.401773	2.73836	2.33659	-0.52638	2.70078	2.1744	DDX21_quantile	S1P	Other
Fulvestrant	0.136614	0.84983	0.84983	-0.591578	4.59076	3.99918	-0.615493	4.73338	4.11788	DDX21_EXPRESSION_median	0.335664	0.681201	0.681201	-0.685776	4.35312	3.66735	-0.146679	4.02223	3.87555	DDX21_quantile	ESR1	Hormone-related
Gefitinib	0.0298221	0.84983	0.84983	-0.907759	1.77904	0.871283	-0.646929	1.60194	0.955008	DDX21_EXPRESSION_median	0.0012432	0.402098	0.402098	-1.47334	1.89926	0.425923	-0.838497	1.74591	0.907412	DDX21_quantile	EGFR	EGFR signaling
Gemcitabine	0.768887	0.94962	0.94962	-0.190067	-2.17609	-2.36616	-0.0095925	-2.4919	-2.5015	DDX21_EXPRESSION_median	0.694328	0.890495	0.890495	-0.523962	-2.05225	-2.57622	0.310847	-3.007	-2.69616	DDX21_quantile	Pyrimidine antimetabolite	DNA replication
Genentech Cpd 10	0.119121	0.84983	0.84983	NA	NA	2.41947	NA	NA	2.19605	DDX21_EXPRESSION_median	0.0400932	0.406828	0.406828	-1.74703	3.18844	1.44141	-2.29972	3.57502	1.27531	DDX21_quantile	AURKA, AURKB	Mitosis
GNF-2	0.628571	0.896325	0.896325	NA	NA	NA	NA	NA	NA	DDX21_EXPRESSION_median	0.628571	0.853768	0.853768	NA	NA	NA	NA	NA	NA	DDX21_quantile	BCR-ABL	ABL signaling
GSK1059615	0.30312	0.84983	0.84983	NA	NA	1.43588	NA	NA	1.6104	DDX21_EXPRESSION_median	0.866511	0.949036	0.949036	-0.0301274	1.13988	1.10976	0.38042	0.835535	1.21596	DDX21_quantile	PI3K	PI3K/MTOR signaling
GSK1070916	0.254303	0.84983	0.84983	NA	NA	NA	NA	NA	NA	DDX21_EXPRESSION_median	0.0973193	0.425002	0.425002	NA	2.18173	NA	NA	2.63842	NA	DDX21_quantile	AURKA, AURKC	Mitosis
GSK1904529A	0.242648	0.84983	0.84983	NA	NA	NA	NA	NA	NA	DDX21_EXPRESSION_median	0.151981	0.499367	0.499367	-0.627642	2.88917	2.26153	-0.261899	2.58418	2.32228	DDX21_quantile	IGF1R, IR	RTK signaling
GSK269962A	0.574293	0.896325	0.896325	-0.351019	3.03526	2.68424	-0.644159	3.2256	2.58144	DDX21_EXPRESSION_median	0.0400932	0.406828	0.406828	-1.24127	3.07466	1.83339	-1.00384	3.29145	2.28761	DDX21_quantile	ROCK1, ROCK2	Cytoskeleton
GSK319347A	0.228571	0.84983	0.84983	NA	NA	NA	NA	NA	NA	DDX21_EXPRESSION_median	0.228571	0.56731	0.56731	NA	NA	NA	NA	NA	NA	DDX21_quantile	IKK	Other, kinases
GSK429286A	0.149964	0.84983	0.84983	NA	NA	4.95582	NA	NA	4.8212	DDX21_EXPRESSION_median	0.00932401	0.402098	0.402098	-1.1136	5.36833	4.25473	-1.45934	5.55323	4.09389	DDX21_quantile	ROCK1, ROCK2	Cytoskeleton
GSK650394	0.756444	0.94962	0.94962	NA	NA	NA	NA	NA	NA	DDX21_EXPRESSION_median	0.208625	0.56731	0.56731	NA	4.04043	NA	NA	4.0796	NA	DDX21_quantile	SGK2, SGK3	Other, kinases
GSK690693	0.648978	0.896325	0.896325	NA	NA	4.21347	NA	NA	4.38078	DDX21_EXPRESSION_median	0.53582	0.81078	0.81078	0.24527	3.58066	3.82593	0.360335	3.73705	4.09738	DDX21_quantile	AKT1, AKT2, AKT3	PI3K/MTOR signaling
GW-2580	1	1	1	NA	NA	5.60468	NA	NA	5.64266	DDX21_EXPRESSION_median	0.53582	0.81078	0.81078	-0.23976	5.62739	5.38763	-0.0906425	5.5248	5.43416	DDX21_quantile	CSF1R	RTK signaling
GW441756	0.538245	0.896325	0.896325	0.0200219	2.95501	2.97503	0.599691	2.73527	3.33496	DDX21_EXPRESSION_median	0.866511	0.949036	0.949036	-0.203021	3.19312	2.9901	0.538146	2.66753	3.20567	DDX21_quantile	NTRK1	RTK signaling
GW843682X	0.628571	0.896325	0.896325	NA	NA	NA	NA	NA	NA	DDX21_EXPRESSION_median	0.628571	0.853768	0.853768	NA	NA	NA	NA	NA	NA	DDX21_quantile	PLK1	Cell cycle
HG-5-113-01	0.0947195	0.84983	0.84983	NA	NA	NA	NA	NA	NA	DDX21_EXPRESSION_median	0.128205	0.4756	0.4756	NA	1.74583	NA	NA	1.71256	NA	DDX21_quantile	LOK, LTK, TRCB, ABL(T315I)	Other
HG-5-88-01	0.719695	0.94962	0.94962	NA	NA	NA	NA	NA	NA	DDX21_EXPRESSION_median	0.804779	0.949036	0.949036	NA	2.90323	NA	NA	2.35897	NA	DDX21_quantile	EGFR, ADCK4	Other, kinases
HG6-64-1	0.270317	0.84983	0.84983	NA	NA	NA	NA	NA	NA	DDX21_EXPRESSION_median	0.189277	0.548745	0.548745	-0.853982	1.82596	0.971977	-1.71733	2.62063	0.903296	DDX21_quantile	BRAF	ERK MAPK signaling
I-BET-762	0.251772	0.84983	0.84983	NA	NA	3.04605	NA	NA	3.174	DDX21_EXPRESSION_median	0.189277	0.548745	0.548745	-1.31097	3.8889	2.57792	-0.135932	3.21995	3.08402	DDX21_quantile	BRD2, BRD3, BRD4	Chromatin other
IAP_5620	0.122518	0.84983	0.84983	-0.607885	4.85842	4.25054	-0.810322	4.95876	4.14844	DDX21_EXPRESSION_median	0.189277	0.548745	0.548745	-0.599428	4.79763	4.1982	-0.843033	4.95872	4.11569	DDX21_quantile	IAP	Other
IAP_7638	0.40951	0.84983	0.84983	NA	4.90653	NA	NA	5.00843	NA	DDX21_EXPRESSION_median	0.804779	0.949036	0.949036	NA	4.86978	NA	NA	4.9588	NA	DDX21_quantile	IAP	Other
IC-87114	0.16741	0.84983	0.84983	NA	NA	5.63377	NA	NA	5.451	DDX21_EXPRESSION_median	0.00590521	0.402098	0.402098	-0.593891	5.94584	5.35195	-0.434716	5.74853	5.31381	DDX21_quantile	PI3Kdelta	PI3K/MTOR signaling
ICL1100013	0.05475	0.84983	0.84983	NA	NA	2.48434	NA	NA	2.44164	DDX21_EXPRESSION_median	0.0400932	0.406828	0.406828	-1.61163	3.51614	1.90451	-1.39219	3.56979	2.1776	DDX21_quantile	N-myristoyltransferase 1/2	Other
Idelalisib	0.60847	0.896325	0.896325	NA	NA	4.89503	NA	NA	4.88066	DDX21_EXPRESSION_median	0.463403	0.736747	0.736747	-0.207891	4.81316	4.60527	-0.766903	5.38236	4.61546	DDX21_quantile	PI3Kdelta	PI3K/MTOR signaling
IGFR_3801	0.574293	0.896325	0.896325	0.378288	-0.276295	0.101994	0.583544	-0.187667	0.395877	DDX21_EXPRESSION_median	0.778866	0.939541	0.939541	-0.344378	-0.554036	-0.898414	0.119525	-0.797039	-0.677514	DDX21_quantile	IGFR1	IGF1R signaling
Imatinib	0.628571	0.896325	0.896325	NA	NA	NA	NA	NA	NA	DDX21_EXPRESSION_median	0.628571	0.853768	0.853768	NA	NA	NA	NA	NA	NA	DDX21_quantile	ABL, KIT, PDGFR	Other, kinases
IMD-0354	0.909511	0.986733	0.986733	NA	NA	1.4816	NA	NA	1.60146	DDX21_EXPRESSION_median	0.612587	0.853768	0.853768	-0.315112	1.59925	1.28414	0.0305935	1.33156	1.36216	DDX21_quantile	IKKb	Other, kinases
IOX2	0.294537	0.84983	0.84983	-0.267944	0.494113	0.22617	-0.125499	0.517313	0.391814	DDX21_EXPRESSION_median	0.231857	0.56731	0.56731	-0.42353	0.397936	-0.0255942	-0.40939	0.408461	-0.000929	DDX21_quantile	EGLN1	Other
IPA-3	0.561888	0.896325	0.896325	NA	NA	NA	NA	NA	NA	DDX21_EXPRESSION_median	0.280963	0.621362	0.621362	-0.951779	4.85075	3.89897	-0.377065	4.73827	4.3612	DDX21_quantile	PAK1	Cytoskeleton
Ispinesib Mesylate	0.424429	0.84983	0.84983	NA	NA	-2.07665	NA	NA	-2.9539	DDX21_EXPRESSION_median	0.00932401	0.402098	0.402098	-2.27424	-0.762439	-3.03668	-2.55368	-0.479812	-3.03349	DDX21_quantile	KSP	Mitosis
JAK1_3715	0.270124	0.84983	0.84983	-0.438841	4.76675	4.32791	-0.24187	4.78893	4.54706	DDX21_EXPRESSION_median	0.231857	0.56731	0.56731	-0.638024	4.78912	4.1511	-0.207375	4.64755	4.44017	DDX21_quantile	JAK1	Other, kinases
JAK3_7406	0.320322	0.84983	0.84983	-0.485101	4.46767	3.98257	-0.552988	4.36123	3.80825	DDX21_EXPRESSION_median	0.463403	0.736747	0.736747	-0.652872	4.19165	3.53878	-0.350274	3.86562	3.51535	DDX21_quantile	JAK3	Other, kinases
JNJ38877605	0.0821299	0.84983	0.84983	NA	NA	4.24882	NA	NA	4.28773	DDX21_EXPRESSION_median	0.189277	0.548745	0.548745	-0.985021	5.2634	4.27838	-0.889437	5.23543	4.34599	DDX21_quantile	MET	RTK signaling
JNK-9L	0.331649	0.84983	0.84983	NA	NA	NA	NA	NA	NA	DDX21_EXPRESSION_median	0.335664	0.681201	0.681201	-0.603722	-0.138831	-0.742553	-0.893324	-0.005807	-0.899131	DDX21_quantile	JNK2, JNK3	JNK and p38 signaling
JNK Inhibitor VIII	0.469594	0.866363	0.866363	-0.301038	5.17726	4.87622	-0.156117	5.07613	4.92002	DDX21_EXPRESSION_median	0.0938617	0.425002	0.425002	-0.777938	5.33969	4.56176	-0.687987	5.37535	4.68736	DDX21_quantile	JNK	JNK and p38 signaling
JQ1	0.109548	0.84983	0.84983	-0.571567	1.60294	1.03137	-1.10975	1.99517	0.88542	DDX21_EXPRESSION_median	0.0289044	0.406828	0.406828	-0.970415	1.64806	0.677647	-1.49165	1.93257	0.440928	DDX21_quantile	BRD2, BRD3, BRD4, BRDT	Chromatin other
JQ12	0.652185	0.896429	0.896429	NA	NA	NA	NA	NA	NA	DDX21_EXPRESSION_median	0.396892	0.700508	0.700508	-1.06779	2.28742	1.21963	-0.930185	1.81872	0.888535	DDX21_quantile	HDAC1, HDAC2	Chromatin histone acetylation
JW-7-24-1	0.360704	0.84983	0.84983	NA	NA	2.03935	NA	NA	1.5313	DDX21_EXPRESSION_median	0.335664	0.681201	0.681201	-0.132777	1.81308	1.6803	-0.332787	1.83553	1.50275	DDX21_quantile	LCK	Other, kinases
JW-7-52-1	0.857143	0.971638	0.971638	NA	NA	NA	NA	NA	NA	DDX21_EXPRESSION_median	0.857143	0.949036	0.949036	NA	NA	NA	NA	NA	NA	DDX21_quantile	MTOR	PI3K/MTOR signaling
kb NB 142-70	0.494033	0.887538	0.887538	NA	NA	3.34437	NA	NA	3.51293	DDX21_EXPRESSION_median	0.231857	0.56731	0.56731	-1.26606	4.1762	2.91014	0.220646	2.89017	3.11082	DDX21_quantile	PKD	Other, kinases
KIN001-042	0.864617	0.971638	0.971638	NA	NA	4.55875	NA	NA	4.53442	DDX21_EXPRESSION_median	0.231857	0.56731	0.56731	-0.349591	4.571	4.22141	-0.172144	4.59148	4.41934	DDX21_quantile	GSK3B	WNT signaling
KIN001-236	0.494033	0.887538	0.887538	NA	NA	4.57199	NA	NA	4.41403	DDX21_EXPRESSION_median	0.189277	0.548745	0.548745	-0.521279	4.68253	4.16125	-0.565603	4.81757	4.25197	DDX21_quantile	Angiopoietin-1 receptor	RTK signaling
KIN001-244	0.73296	0.94962	0.94962	NA	NA	3.68713	NA	NA	3.20237	DDX21_EXPRESSION_median	0.396892	0.700508	0.700508	-0.176705	3.59861	3.42191	-0.423312	3.61541	3.1921	DDX21_quantile	PDK1 (PDPK1)	Metabolism
KIN001-260	0.494033	0.887538	0.887538	NA	NA	4.9037	NA	NA	4.77699	DDX21_EXPRESSION_median	0.335664	0.681201	0.681201	-0.561088	4.90804	4.34695	-0.623775	4.97953	4.35575	DDX21_quantile	IKKB	Other, kinases
KIN001-266	0.73296	0.94962	0.94962	NA	NA	3.42257	NA	NA	3.12199	DDX21_EXPRESSION_median	0.694328	0.890495	0.890495	-0.290526	3.40338	3.11285	-0.190323	3.09254	2.90222	DDX21_quantile	MAP3K8	ERK MAPK signaling
KIN001-270	0.458521	0.862042	0.862042	NA	NA	5.3413	NA	NA	5.46085	DDX21_EXPRESSION_median	0.0938617	0.425002	0.425002	-0.729678	5.56349	4.83381	-0.481213	5.37098	4.88977	DDX21_quantile	CDK9	Cell cycle
Kobe2602	0.424429	0.84983	0.84983	NA	NA	5.07178	NA	NA	4.98772	DDX21_EXPRESSION_median	0.0938617	0.425002	0.425002	-0.49038	5.28791	4.79753	-0.347976	5.29837	4.95039	DDX21_quantile	RAS effector	RTK signaling
KU-55933	0.437102	0.84983	0.84983	-0.301297	4.70395	4.40265	-0.310026	4.89825	4.58823	DDX21_EXPRESSION_median	0.280963	0.621362	0.621362	-0.526068	4.64158	4.11551	-0.626009	4.74152	4.11551	DDX21_quantile	ATM	Genome integrity
KU-60019	0.0976424	0.84983	0.84983	-0.844249	4.27576	3.43151	-0.967398	4.49749	3.5301	DDX21_EXPRESSION_median	0.0540793	0.425002	0.425002	-1.29277	3.92862	2.63585	-1.02615	3.52003	2.49388	DDX21_quantile	ATM	Genome integrity
Lapatinib	1	1	1	NA	NA	NA	NA	NA	NA	DDX21_EXPRESSION_median	1	1	1	NA	NA	NA	NA	NA	NA	DDX21_quantile	EGFR, ERBB2	RTK signaling
LCL161	0.251772	0.84983	0.84983	NA	NA	3.73389	NA	NA	3.83499	DDX21_EXPRESSION_median	0.231857	0.56731	0.56731	-0.490117	3.99281	3.5027	-0.413388	4.04333	3.62994	DDX21_quantile	XIAP, cIAP1, cIAP2	Apoptosis regulation
LDN-193189	0.954685	0.992068	0.992068	NA	NA	1.16896	NA	NA	1.22788	DDX21_EXPRESSION_median	0.612587	0.853768	0.853768	-0.360339	1.35483	0.994489	0.0950125	0.971476	1.06649	DDX21_quantile	BMP	Other
Lenalidomide	0.538245	0.896325	0.896325	-0.271814	4.30732	4.0355	-0.514221	4.5355	4.02128	DDX21_EXPRESSION_median	0.00590521	0.402098	0.402098	-0.932347	4.49755	3.5652	-0.906585	4.58019	3.67361	DDX21_quantile	CRBN	Protein stability and degradation
Lestaurtinib	0.37602	0.84983	0.84983	-0.559551	0.029433	-0.530118	-0.680041	0.0362255	-0.643815	DDX21_EXPRESSION_median	0.694328	0.890495	0.890495	-0.234889	-0.6751	-0.909989	-0.430602	-0.585371	-1.01597	DDX21_quantile	FLT3, JAK2, NTRK1, NTRK2, NTRK3	Other, kinases
LFM-A13	0.477855	0.872274	0.872274	NA	NA	NA	NA	NA	NA	DDX21_EXPRESSION_median	1	1	1	-0.0794012	5.20227	5.12287	0.0524815	5.19529	5.24777	DDX21_quantile	BTK	Other, kinases
LGK974	1	1	1	NA	NA	3.18952	NA	NA	3.13893	DDX21_EXPRESSION_median	0.463403	0.736747	0.736747	-0.296007	3.23629	2.94028	-0.120806	3.2193	3.0985	DDX21_quantile	PORCN	WNT signaling
LIMK1 inhibitor BMS4	0.0933071	0.84983	0.84983	NA	NA	4.91509	NA	NA	4.83215	DDX21_EXPRESSION_median	0.0037296	0.402098	0.402098	-1.10319	5.78881	4.68562	-1.06055	5.78762	4.72707	DDX21_quantile	LIMK1	Cytoskeleton
Linifanib	0.251772	0.84983	0.84983	NA	NA	2.18837	NA	NA	2.27506	DDX21_EXPRESSION_median	0.463403	0.736747	0.736747	-0.716308	2.61672	1.90041	-0.259476	2.4593	2.19982	DDX21_quantile	VEGFR1, VEGFR2, VEGFR3, CSF1R, FLT3, KIT	RTK signaling
Linsitinib	0.400923	0.84983	0.84983	NA	NA	NA	NA	NA	NA	DDX21_EXPRESSION_median	0.694328	0.890495	0.890495	0.47017	1.67026	2.14043	1.59334	0.864129	2.45747	DDX21_quantile	IGF1R	IGF1R signaling
Luminespib	0.747658	0.94962	0.94962	NA	NA	NA	NA	NA	NA	DDX21_EXPRESSION_median	0.463403	0.736747	0.736747	-1.08196	-1.57862	-2.66058	-0.437115	-2.54369	-2.9808	DDX21_quantile	HSP90	Protein stability and degradation
Masitinib	0.105614	0.84983	0.84983	NA	NA	3.7647	NA	NA	3.34794	DDX21_EXPRESSION_median	0.0289044	0.406828	0.406828	-0.950331	4.23817	3.28784	-0.612019	3.85144	3.23942	DDX21_quantile	KIT, PDGFRA, PDGFRB	RTK signaling
MCT1_6447	0.437102	0.84983	0.84983	-0.100133	4.59695	4.49682	-0.461337	4.89966	4.43833	DDX21_EXPRESSION_median	0.53582	0.81078	0.81078	-0.160446	4.28221	4.12177	-0.861157	5.01363	4.15247	DDX21_quantile	MCT1	Cell cycle
MCT4_1422	0.0768398	0.84983	0.84983	-0.54084	4.95983	4.419	-0.338464	4.87235	4.53389	DDX21_EXPRESSION_median	0.0540793	0.425002	0.425002	-0.884435	5.01464	4.1302	-0.583848	4.79468	4.21083	DDX21_quantile	MCT4	Other
MetAP2 Inhibitor, A832234	0.251772	0.84983	0.84983	NA	NA	2.50457	NA	NA	2.49332	DDX21_EXPRESSION_median	1	1	1	-0.222195	2.38109	2.15889	0.323725	1.91793	2.24165	DDX21_quantile	MetAP2	Other
Methotrexate	0.503319	0.890488	0.890488	-0.377912	-0.161538	-0.53945	-0.41249	0.151892	-0.260599	DDX21_EXPRESSION_median	0.694328	0.890495	0.890495	-0.305731	-0.274773	-0.580504	-0.26009	-0.139992	-0.400082	DDX21_quantile	Antimetabolite	DNA replication
MG-132	0.4	0.84983	0.84983	NA	NA	NA	NA	NA	NA	DDX21_EXPRESSION_median	0.4	0.700508	0.700508	NA	NA	NA	NA	NA	NA	DDX21_quantile	Proteasome, CAPN1	Protein stability and degradation
Midostaurin	0.519032	0.896325	0.896325	NA	NA	NA	NA	NA	NA	DDX21_EXPRESSION_median	0.280963	0.621362	0.621362	-0.851714	0.501207	-0.350506	-1.45692	0.871069	-0.585852	DDX21_quantile	PKC, PPK, FLT1, c-FGR, others	Other
MIM1	0.0493293	0.84983	0.84983	NA	NA	3.99724	NA	NA	4.04717	DDX21_EXPRESSION_median	0.344988	0.696029	0.696029	NA	NA	3.81665	NA	NA	3.9344	DDX21_quantile	MCL-1	Apoptosis regulation
Mirin	0.182316	0.84983	0.84983	NA	NA	NA	NA	NA	NA	DDX21_EXPRESSION_median	0.0952381	0.425002	0.425002	NA	NA	NA	NA	NA	NA	DDX21_quantile	MRE11	Genome integrity
Mitomycin-C	0.948729	0.992068	0.992068	NA	NA	NA	NA	NA	NA	DDX21_EXPRESSION_median	0.396892	0.700508	0.700508	-0.609203	-0.0268513	-0.636054	-0.93636	0.04429	-0.892069	DDX21_quantile	DNA crosslinker	DNA replication
MK-2206	0.105614	0.84983	0.84983	NA	NA	2.35998	NA	NA	2.32201	DDX21_EXPRESSION_median	0.189277	0.548745	0.548745	0.91779	1.33089	2.24868	1.33993	0.855685	2.19561	DDX21_quantile	AKT1, AKT2	PI3K/MTOR signaling
Motesanib	0.347493	0.84983	0.84983	-0.308737	3.38793	3.07919	-0.529942	3.47082	2.94088	DDX21_EXPRESSION_median	0.396892	0.700508	0.700508	-0.546186	3.39372	2.84753	-0.767976	3.66947	2.90149	DDX21_quantile	VEGFR, RET, KIT, PDGFR	RTK signaling
MPS-1-IN-1	0.909511	0.986733	0.986733	NA	NA	3.4637	NA	NA	3.06443	DDX21_EXPRESSION_median	0.778866	0.939541	0.939541	-0.022231	2.97926	2.95703	-0.211747	2.83813	2.62639	DDX21_quantile	MPS1	Mitosis
Navitoclax	0.611412	0.896325	0.896325	0.52139	1.82162	2.34301	0.601943	2.1429	2.74484	DDX21_EXPRESSION_median	0.778866	0.939541	0.939541	0.458124	1.77858	2.2367	-0.594953	3.24938	2.65443	DDX21_quantile	BCL2, BCL-XL, BCL-W	Apoptosis regulation
NG-25	0.276668	0.84983	0.84983	NA	NA	2.79052	NA	NA	2.74469	DDX21_EXPRESSION_median	0.396892	0.700508	0.700508	-1.12206	3.42401	2.30195	-1.49117	3.78645	2.29528	DDX21_quantile	TAK1, MAP4K2	Other, kinases
Nilotinib	0.18607	0.84983	0.84983	-0.418165	3.31857	2.9004	-0.524213	3.5454	3.02119	DDX21_EXPRESSION_median	0.0400932	0.406828	0.406828	-0.873406	3.36793	2.49453	-0.665864	3.66084	2.99498	DDX21_quantile	ABL	ABL signaling
NPK76-II-72-1	0.251772	0.84983	0.84983	NA	NA	2.83985	NA	NA	2.86529	DDX21_EXPRESSION_median	0.151981	0.499367	0.499367	-1.21195	3.60855	2.3966	-1.72731	3.96969	2.24238	DDX21_quantile	PLK3	Cell cycle
NSC-207895	0.530912	0.896325	0.896325	NA	NA	4.27806	NA	NA	4.41824	DDX21_EXPRESSION_median	0.53582	0.81078	0.81078	-0.473878	4.61431	4.14043	-0.313503	4.37961	4.0661	DDX21_quantile	MDM4	p53 pathway
NSC-87877	0.216945	0.84983	0.84983	NA	NA	NA	NA	NA	NA	DDX21_EXPRESSION_median	0.120591	0.452214	0.452214	-0.340856	5.12838	4.78752	-0.47326	5.32894	4.85568	DDX21_quantile	SHP-1 (PTPN6), SHP-2 (PTPN11)	Other
NSC319726	0.864617	0.971638	0.971638	NA	NA	-2.68782	NA	NA	-2.43393	DDX21_EXPRESSION_median	0.955089	0.980672	0.980672	-0.0160497	-2.63976	-2.65581	1.13541	-3.06487	-1.92946	DDX21_quantile	P53 Mut specific	p53 pathway
NU7441	0.649511	0.896325	0.896325	-0.105767	3.0739	2.96813	-0.12891	3.19184	3.06293	DDX21_EXPRESSION_median	0.612587	0.853768	0.853768	-0.259332	3.10001	2.84068	-0.0018815	3.03206	3.03018	DDX21_quantile	DNAPK	Genome integrity
Nutlin-3a (-)	0.728339	0.94962	0.94962	-0.29638	3.74518	3.4488	0.0957335	3.82258	3.91832	DDX21_EXPRESSION_median	0.335664	0.681201	0.681201	-0.709212	3.51718	2.80797	-0.221975	2.83893	2.61696	DDX21_quantile	MDM2	p53 pathway
NVP-BHG712	0.864617	0.971638	0.971638	NA	NA	2.61725	NA	NA	2.49825	DDX21_EXPRESSION_median	0.694328	0.890495	0.890495	0.0190577	2.39161	2.41067	0.749172	1.52643	2.2756	DDX21_quantile	EPHB4	RTK signaling
NVP-TAE684	0.4	0.84983	0.84983	NA	NA	NA	NA	NA	NA	DDX21_EXPRESSION_median	0.4	0.700508	0.700508	NA	NA	NA	NA	NA	NA	DDX21_quantile	ALK	RTK signaling
Obatoclax Mesylate	0.0758911	0.84983	0.84983	NA	NA	NA	NA	NA	NA	DDX21_EXPRESSION_median	0.0540793	0.425002	0.425002	-2.1044	1.13792	-0.966481	-3.2003	1.98899	-1.21131	DDX21_quantile	BCL2, BCL-XL, BCL-W, MCL1	Apoptosis regulation
Olaparib	0.574293	0.896325	0.896325	-0.213056	4.209	3.99594	-0.403463	4.37519	3.97172	DDX21_EXPRESSION_median	0.0938617	0.425002	0.425002	-0.641788	4.3047	3.66291	-0.665166	4.38185	3.71669	DDX21_quantile	PARP1, PARP2	Genome integrity
Omipalisib	1	1	1	NA	NA	-2.37251	NA	NA	-2.39569	DDX21_EXPRESSION_median	0.955089	0.980672	0.980672	0.124367	-2.65238	-2.52801	-0.0460985	-3.13201	-3.17811	DDX21_quantile	PI3K (class 1), MTORC1, MTORC2	PI3K/MTOR signaling
OSI-027	0.73296	0.94962	0.94962	NA	NA	2.41555	NA	NA	2.6824	DDX21_EXPRESSION_median	0.778866	0.939541	0.939541	-0.394372	2.20666	1.81229	-0.290289	1.67312	1.38283	DDX21_quantile	MTORC1, MTORC2	PI3K/MTOR signaling
OSI-930	0.954685	0.992068	0.992068	NA	NA	4.09287	NA	NA	4.02795	DDX21_EXPRESSION_median	0.335664	0.681201	0.681201	-0.74837	4.12322	3.37485	-0.149882	3.80435	3.65447	DDX21_quantile	KIT	RTK signaling
OSU-03012	0.972539	1	1	NA	NA	NA	NA	NA	NA	DDX21_EXPRESSION_median	0.382867	0.700508	0.700508	NA	2.69481	NA	NA	2.48236	NA	DDX21_quantile	PDK1 (PDPK1)	Metabolism
PAC-1	0.91769	0.992068	0.992068	NA	NA	NA	NA	NA	NA	DDX21_EXPRESSION_median	0.901515	0.980672	0.980672	NA	2.5689	NA	NA	2.81853	NA	DDX21_quantile	Procaspase-3, Procaspase-7	Apoptosis regulation
Paclitaxel	0.628571	0.896325	0.896325	NA	NA	NA	NA	NA	NA	DDX21_EXPRESSION_median	0.628571	0.853768	0.853768	NA	NA	NA	NA	NA	NA	DDX21_quantile	Microtubule stabiliser	Mitosis
Palbociclib	0.530912	0.896325	0.896325	NA	NA	1.57554	NA	NA	1.1375	DDX21_EXPRESSION_median	0.463403	0.736747	0.736747	-0.605774	1.83951	1.23374	-0.620967	1.53924	0.918278	DDX21_quantile	CDK4, CDK6	Cell cycle
Panobinostat	0.60847	0.896325	0.896325	NA	NA	-3.43849	NA	NA	-3.39856	DDX21_EXPRESSION_median	0.955089	0.980672	0.980672	-0.703821	-2.8026	-3.50642	0.207665	-3.68822	-3.48056	DDX21_quantile	HDAC	Chromatin histone acetylation
PARP_0108	0.978697	1	1	-0.108859	1.24966	1.1408	-0.382252	1.63983	1.25758	DDX21_EXPRESSION_median	0.866511	0.949036	0.949036	-0.364613	0.861876	0.497263	-0.269747	0.69361	0.423862	DDX21_quantile	PARP1, PARP2, PARP6	Genome integrity
PARP_9482	0.768887	0.94962	0.94962	-0.272834	0.600029	0.327194	0.014457	1.12034	1.13479	DDX21_EXPRESSION_median	1	1	1	-0.251419	0.0811074	-0.170312	-0.172733	0.470499	0.297766	DDX21_quantile	PARP1, PARP2, PARP5a	Genome integrity
PARP_9495	0.405904	0.84983	0.84983	-0.47371	2.37165	1.89794	-0.328904	2.23092	1.90202	DDX21_EXPRESSION_median	0.53582	0.81078	0.81078	-0.505721	2.23705	1.73133	-0.483106	1.99949	1.51639	DDX21_quantile	PARP1, PARP2, PARP7	Genome integrity
Parthenolide	0.628571	0.896325	0.896325	NA	NA	NA	NA	NA	NA	DDX21_EXPRESSION_median	0.628571	0.853768	0.853768	NA	NA	NA	NA	NA	NA	DDX21_quantile	HDAC1	Chromatin histone acetylation
Pazopanib	0.331649	0.84983	0.84983	NA	NA	NA	NA	NA	NA	DDX21_EXPRESSION_median	0.0938617	0.425002	0.425002	-1.28579	4.48751	3.20171	-0.87875	4.62933	3.75058	DDX21_quantile	CSF1R, KIT, PDGFRA, PDGFRB	RTK signaling
PD0325901	0.270124	0.84983	0.84983	0.610408	-2.66881	-2.05841	1.05502	-2.73175	-1.67673	DDX21_EXPRESSION_median	0.463403	0.736747	0.736747	0.661531	-2.55101	-1.88948	0.817621	-2.42586	-1.60824	DDX21_quantile	MEK1, MEK2	ERK MAPK signaling
PD173074	0.768887	0.94962	0.94962	-0.218123	3.06652	2.8484	0.381201	3.19102	3.57222	DDX21_EXPRESSION_median	0.189277	0.548745	0.548745	-1.06658	3.24472	2.17814	-0.543686	3.24716	2.70348	DDX21_quantile	FGFR1, FGFR2, FGFR3	RTK signaling
Pelitinib	0.391812	0.84983	0.84983	NA	NA	1.38152	NA	NA	1.45396	DDX21_EXPRESSION_median	0.280963	0.621362	0.621362	-1.15798	2.00751	0.849527	-1.48505	2.35091	0.86586	DDX21_quantile	EGFR	EGFR signaling
Pemetrexed	0.73296	0.94962	0.94962	NA	NA	2.39525	NA	NA	2.33324	DDX21_EXPRESSION_median	0.612587	0.853768	0.853768	0.424937	1.69925	2.12419	-0.081032	2.53395	2.45292	DDX21_quantile	TYMS	DNA replication
Pevonedistat	0.89675	0.986733	0.986733	NA	NA	NA	NA	NA	NA	DDX21_EXPRESSION_median	0.904762	0.980672	0.980672	NA	NA	NA	NA	NA	NA	DDX21_quantile	NAE	Other
PF-00299804	0.776211	0.94962	0.94962	NA	NA	2.15378	NA	NA	2.59943	DDX21_EXPRESSION_median	0.53582	0.81078	0.81078	-1.23364	2.89859	1.66496	-0.188143	2.07485	1.88671	DDX21_quantile	EGFR, ERBB2, ERBB4	RTK signaling
PF-4708671	0.728339	0.94962	0.94962	-0.154117	4.45413	4.30001	-0.024601	4.30585	4.28125	DDX21_EXPRESSION_median	0.280963	0.621362	0.621362	-0.604034	4.59611	3.99208	-0.489567	4.55928	4.06972	DDX21_quantile	S6K1	PI3K/MTOR signaling
PF-562271	0.242648	0.84983	0.84983	NA	NA	NA	NA	NA	NA	DDX21_EXPRESSION_median	0.0938617	0.425002	0.425002	-1.0109	2.46381	1.45292	-1.47225	2.65502	1.18277	DDX21_quantile	FAK, FAK2	Cytoskeleton
PFI-1	0.0523235	0.84983	0.84983	-0.857033	3.52927	2.67224	-0.668095	3.25193	2.58384	DDX21_EXPRESSION_median	0.013986	0.402098	0.402098	-1.54989	3.77542	2.22554	-1.30282	3.50445	2.20163	DDX21_quantile	BRD4	Chromatin other
PFI-3	0.965401	1	1	NA	NA	NA	NA	NA	NA	DDX21_EXPRESSION_median	0.555556	0.833333	0.833333	NA	NA	NA	NA	NA	NA	DDX21_quantile	SMARCA2, SMARCA4, PB1	Chromatin other
PHA-665752	0.0571429	0.84983	0.84983	NA	NA	NA	NA	NA	NA	DDX21_EXPRESSION_median	0.0571429	0.425002	0.425002	NA	NA	NA	NA	NA	NA	DDX21_quantile	MET	RTK signaling
PHA-793887	0.0720247	0.84983	0.84983	NA	NA	2.20016	NA	NA	2.74116	DDX21_EXPRESSION_median	0.0721057	0.425002	0.425002	-2.18763	4.15769	1.97006	-2.4019	4.76425	2.36235	DDX21_quantile	CDK2, CDK7, CDK5	Cell cycle
Phenformin	0.16741	0.84983	0.84983	NA	NA	7.62697	NA	NA	7.83021	DDX21_EXPRESSION_median	0.694328	0.890495	0.890495	0.102542	6.45225	6.55479	0.467388	6.37976	6.84715	DDX21_quantile	Biguanide agent	Other
PI-103	0.30312	0.84983	0.84983	NA	NA	1.975	NA	NA	1.71164	DDX21_EXPRESSION_median	0.612587	0.853768	0.853768	-1.21703	2.42618	1.20916	-0.017291	1.07601	1.05872	DDX21_quantile	PI3Kalpha, DAPK3, CLK4, PIM3, HIPK2	Other, kinases
PI3Ka_4409	0.574293	0.896325	0.896325	0.602941	2.12145	2.72439	0.311774	1.99449	2.30626	DDX21_EXPRESSION_median	0.955089	0.980672	0.980672	0.350314	2.07684	2.42716	0.194021	1.81403	2.00806	DDX21_quantile	PI3Kalpha, PI3Kdelta	PI3K/MTOR signaling
Pictilisib	0.437102	0.84983	0.84983	0.442689	1.33658	1.77927	-0.141655	1.61504	1.47339	DDX21_EXPRESSION_median	0.396892	0.700508	0.700508	0.2665	1.21139	1.47789	0.905147	0.516004	1.42115	DDX21_quantile	PI3K (class 1)	PI3K/MTOR signaling
PIK-93	0.909511	0.986733	0.986733	NA	NA	3.10877	NA	NA	3.0286	DDX21_EXPRESSION_median	0.53582	0.81078	0.81078	-0.0148618	2.925	2.91014	0.509786	2.35822	2.86801	DDX21_quantile	PI3Kgamma	PI3K/MTOR signaling
Pilaralisib	0.276668	0.84983	0.84983	NA	NA	3.68786	NA	NA	3.71564	DDX21_EXPRESSION_median	0.231857	0.56731	0.56731	-0.661742	4.22628	3.56454	-0.876119	4.37432	3.4982	DDX21_quantile	PI3K	PI3K/MTOR signaling
Piperlongumine	0.810042	0.971638	0.971638	0.370819	2.1785	2.54932	-0.152413	1.9313	1.77889	DDX21_EXPRESSION_median	0.463403	0.736747	0.736747	-0.26194	2.10796	1.84602	-0.368065	1.87736	1.5093	DDX21_quantile	Induces reactive oxygen species	Other
PLK_6522	0.205087	0.84983	0.84983	-0.970846	-1.00144	-1.97229	-1.21967	-0.777215	-1.99689	DDX21_EXPRESSION_median	0.151981	0.499367	0.499367	-1.48617	-1.24257	-2.72874	-1.6734	-0.862333	-2.53573	DDX21_quantile	PLK1, PLK2, PLK3	Cell cycle
PLX-4720	0.768887	0.94962	0.94962	0.162491	3.97402	4.13651	-0.345769	4.79648	4.45071	DDX21_EXPRESSION_median	0.280963	0.621362	0.621362	-0.357934	4.55404	4.1961	-0.69334	5.18224	4.4889	DDX21_quantile	BRAF	ERK MAPK signaling
Ponatinib	0.0233077	0.84983	0.84983	NA	NA	NA	NA	NA	NA	DDX21_EXPRESSION_median	0.0938617	0.425002	0.425002	-1.09647	1.24768	0.15121	-0.985127	1.07489	0.0897595	DDX21_quantile	ABL, PDGFRA, VEGFR2, FGFR1, SRC, TIE2, FLT3	Other, kinases
Pyrimethamine	0.4	0.84983	0.84983	NA	NA	NA	NA	NA	NA	DDX21_EXPRESSION_median	0.4	0.700508	0.700508	NA	NA	NA	NA	NA	NA	DDX21_quantile	Dihydrofolate reductase (DHFR)	Other
QL-VIII-58	0.548962	0.896325	0.896325	NA	NA	NA	NA	NA	NA	DDX21_EXPRESSION_median	0.804779	0.949036	0.949036	NA	-0.511153	NA	NA	-1.00539	NA	DDX21_quantile	MTOR, ATR	Other
QL-X-138	0.648978	0.896325	0.896325	NA	NA	2.10734	NA	NA	2.52206	DDX21_EXPRESSION_median	0.612587	0.853768	0.853768	-0.509965	2.36749	1.85753	-0.328311	2.08751	1.7592	DDX21_quantile	BTK	Other, kinases
QL-XI-92	0.276668	0.84983	0.84983	NA	NA	4.17563	NA	NA	4.61856	DDX21_EXPRESSION_median	0.231857	0.56731	0.56731	-0.832572	4.47086	3.63829	-0.835145	4.56245	3.72731	DDX21_quantile	DDR1	Cytoskeleton
QL-XII-47	0.228426	0.84983	0.84983	NA	NA	1.42949	NA	NA	0.53828	DDX21_EXPRESSION_median	0.231857	0.56731	0.56731	-0.995299	2.02031	1.02501	-1.76612	2.08069	0.314576	DDX21_quantile	BTK, BMX	Other, kinases
QL-XII-61	0.321267	0.84983	0.84983	NA	NA	NA	NA	NA	NA	DDX21_EXPRESSION_median	0.24026	0.58373	0.58373	NA	NA	NA	NA	NA	NA	DDX21_quantile	BMX, BTK	Other, kinases
QS11	0.948729	0.992068	0.992068	NA	NA	NA	NA	NA	NA	DDX21_EXPRESSION_median	0.53582	0.81078	0.81078	-0.622309	3.68368	3.06137	-1.20672	4.39292	3.1862	DDX21_quantile	ARFGAP1	Other
Quizartinib	0.186278	0.84983	0.84983	NA	NA	2.27742	NA	NA	2.5961	DDX21_EXPRESSION_median	0.0938617	0.425002	0.425002	-0.829333	2.74751	1.91818	-0.45085	2.46544	2.01459	DDX21_quantile	FLT3	RTK signaling
RAF_9304	0.688522	0.923358	0.923358	-0.0359836	1.66514	1.62916	0.391452	1.43451	1.82596	DDX21_EXPRESSION_median	1	1	1	-0.738127	1.97882	1.24069	0.322358	1.35567	1.67803	DDX21_quantile	ARAF, BRAF, CRAF	ERK MAPK signaling
Refametinib	0.294537	0.84983	0.84983	0.708772	-0.310898	0.397873	1.52694	-0.961156	0.565786	DDX21_EXPRESSION_median	0.151981	0.499367	0.499367	0.769459	-0.456996	0.312463	1.57514	-1.11813	0.457012	DDX21_quantile	MEK1, MEK2	ERK MAPK signaling
RO-3306	0.574293	0.896325	0.896325	-0.222883	3.90829	3.6854	-0.291704	4.2589	3.9672	DDX21_EXPRESSION_median	0.778866	0.939541	0.939541	-0.301733	3.56487	3.26314	0.677152	2.83145	3.5086	DDX21_quantile	CDK1	Cell cycle
rTRAIL	0.690511	0.923358	0.923358	NA	NA	-1.00337	NA	NA	-1.5397	DDX21_EXPRESSION_median	0.778866	0.939541	0.939541	-0.187653	-1.27322	-1.46087	-0.279097	-1.96782	-2.24692	DDX21_quantile	TRAIL receptor agonist	Apoptosis regulation
RU-SKI 43	0.648978	0.896325	0.896325	NA	NA	4.62168	NA	NA	4.4317	DDX21_EXPRESSION_median	1	1	1	-0.0360277	4.49661	4.46058	-0.426393	4.77578	4.34939	DDX21_quantile	Shh	Other
Rucaparib	0.205087	0.84983	0.84983	-0.503115	4.40139	3.89827	-0.717059	4.52562	3.80857	DDX21_EXPRESSION_median	0.0938617	0.425002	0.425002	-0.952367	4.34537	3.393	-0.63146	4.25778	3.62632	DDX21_quantile	PARP1, PARP2	Genome integrity
Ruxolitinib	0.424429	0.84983	0.84983	NA	NA	4.29252	NA	NA	4.25726	DDX21_EXPRESSION_median	0.0205128	0.406828	0.406828	-0.556441	4.43499	3.87854	-0.386723	4.40167	4.01494	DDX21_quantile	JAK1, JAK2	Other, kinases
S-Trityl-L-cysteine	0.628571	0.896325	0.896325	NA	NA	NA	NA	NA	NA	DDX21_EXPRESSION_median	0.628571	0.853768	0.853768	NA	NA	NA	NA	NA	NA	DDX21_quantile	KIF11	Mitosis
Salubrinal	0.114286	0.84983	0.84983	NA	NA	NA	NA	NA	NA	DDX21_EXPRESSION_median	0.114286	0.452214	0.452214	NA	NA	NA	NA	NA	NA	DDX21_quantile	EIF2A	Other
Saracatinib	0.857143	0.971638	0.971638	NA	NA	NA	NA	NA	NA	DDX21_EXPRESSION_median	0.857143	0.949036	0.949036	NA	NA	NA	NA	NA	NA	DDX21_quantile	ABL, SRC	Other, kinases
SB216763	0.211497	0.84983	0.84983	NA	NA	NA	NA	NA	NA	DDX21_EXPRESSION_median	0.0938617	0.425002	0.425002	-0.764757	4.74767	3.98291	-0.679158	4.62737	3.94821	DDX21_quantile	GSK3A, GSK3B	WNT signaling
SB505124	0.37602	0.84983	0.84983	0.208011	4.21517	4.42318	0.56947	3.9739	4.54337	DDX21_EXPRESSION_median	0.778866	0.939541	0.939541	0.0733483	4.24302	4.31637	0.792147	3.81969	4.61184	DDX21_quantile	TGFBR1, ACVR1B, ACVR1C	RTK signaling
SB52334	0.820139	0.971638	0.971638	NA	NA	4.77681	NA	NA	4.93761	DDX21_EXPRESSION_median	0.694328	0.890495	0.890495	0.032862	4.60152	4.63438	0.237052	4.63255	4.8696	DDX21_quantile	ALK5	Other, kinases
SB590885	0.954685	0.992068	0.992068	NA	NA	3.37262	NA	NA	3.38782	DDX21_EXPRESSION_median	0.463403	0.736747	0.736747	-0.541029	3.67001	3.12898	-1.13569	3.95973	2.82404	DDX21_quantile	BRAF	ERK MAPK signaling
Seliciclib	0.857143	0.971638	0.971638	NA	NA	NA	NA	NA	NA	DDX21_EXPRESSION_median	0.857143	0.949036	0.949036	NA	NA	NA	NA	NA	NA	DDX21_quantile	CDK2, CDK7, CDK9	Cell cycle
Selisistat	0.424429	0.84983	0.84983	NA	NA	5.6173	NA	NA	5.60512	DDX21_EXPRESSION_median	0.0938617	0.425002	0.425002	-0.578227	5.80042	5.2222	-0.355039	5.76118	5.40614	DDX21_quantile	SIRT1	Chromatin histone acetylation
Selumetinib	0.688522	0.923358	0.923358	0.329762	0.774027	1.10379	-0.004303	0.509296	0.504993	DDX21_EXPRESSION_median	0.612587	0.853768	0.853768	-0.31263	1.20939	0.896756	-0.456998	0.892913	0.435915	DDX21_quantile	MEK1, MEK2	ERK MAPK signaling
Sepantronium bromide	0.283929	0.84983	0.84983	NA	NA	-3.13752	NA	NA	-4.87707	DDX21_EXPRESSION_median	0.851815	0.949036	0.949036	NA	NA	-2.35924	NA	NA	-4.09044	DDX21_quantile	BIRC5	Apoptosis regulation
Serdemetan	0.893791	0.986733	0.986733	-0.0980258	3.66531	3.56729	-0.159261	3.73341	3.57415	DDX21_EXPRESSION_median	0.694328	0.890495	0.890495	-0.406076	3.51023	3.10415	0.035329	3.16501	3.20034	DDX21_quantile	MDM2	p53 pathway
SGC0946	0.927908	0.992068	0.992068	NA	NA	NA	NA	NA	NA	DDX21_EXPRESSION_median	0.804779	0.949036	0.949036	NA	1.70088	NA	NA	1.92423	NA	DDX21_quantile	DOT1L	Chromatin histone methylation
Shikonin	0.756444	0.94962	0.94962	NA	NA	NA	NA	NA	NA	DDX21_EXPRESSION_median	0.949717	0.980672	0.980672	NA	NA	0.583713	NA	NA	0.023298	DDX21_quantile	not defined	Other
SL0101	0.569083	0.896325	0.896325	NA	NA	4.5839	NA	NA	4.92901	DDX21_EXPRESSION_median	0.0400932	0.406828	0.406828	-0.959217	5.04133	4.08211	-1.27625	5.33128	4.05503	DDX21_quantile	RSK, AURKB, PIM1, PIM3	Other, kinases
SN-38	0.611412	0.896325	0.896325	-0.291512	-3.4865	-3.77801	-0.337485	-3.47689	-3.81437	DDX21_EXPRESSION_median	0.612587	0.853768	0.853768	-0.360312	-3.77286	-4.13317	-0.927902	-3.38876	-4.31666	DDX21_quantile	TOP1	DNA replication
SNX-2112	0.251772	0.84983	0.84983	NA	NA	-1.437	NA	NA	-1.98204	DDX21_EXPRESSION_median	0.120591	0.452214	0.452214	-0.695984	-1.32819	-2.02417	-1.36229	-1.38792	-2.75022	DDX21_quantile	HSP90	Protein stability and degradation
Sorafenib	0.114286	0.84983	0.84983	NA	NA	NA	NA	NA	NA	DDX21_EXPRESSION_median	0.114286	0.452214	0.452214	NA	NA	NA	NA	NA	NA	DDX21_quantile	PDGFR, KIT, VEGFR, RAF	RTK signaling
Sphingosine Kinase 1 Inhibitor II	0.149964	0.84983	0.84983	NA	NA	3.54767	NA	NA	3.51793	DDX21_EXPRESSION_median	0.0540793	0.425002	0.425002	-0.62902	3.99156	3.36255	-0.581172	4.03366	3.45248	DDX21_quantile	Sphingosine Kinase	Other, kinases
STF-62247	0.0933071	0.84983	0.84983	NA	NA	4.4644	NA	NA	4.17829	DDX21_EXPRESSION_median	0.0400932	0.406828	0.406828	-0.910592	4.93656	4.02597	-0.873518	4.87708	4.00356	DDX21_quantile	Autophagy inducer	Other
SU11274	0.16741	0.84983	0.84983	NA	NA	4.02903	NA	NA	3.86209	DDX21_EXPRESSION_median	0.0205128	0.406828	0.406828	-1.10743	4.50608	3.39865	-1.6737	4.79235	3.11865	DDX21_quantile	MET	RTK signaling
Sunitinib	0.628571	0.896325	0.896325	NA	NA	NA	NA	NA	NA	DDX21_EXPRESSION_median	0.628571	0.853768	0.853768	NA	NA	NA	NA	NA	NA	DDX21_quantile	PDGFR, KIT, VEGFR, FLT3, RET, CSF1R	RTK signaling
T0901317	0.458521	0.862042	0.862042	NA	NA	4.5956	NA	NA	4.51849	DDX21_EXPRESSION_median	0.189277	0.548745	0.548745	-0.574833	4.71388	4.13904	-0.354466	4.6843	4.32984	DDX21_quantile	LXR, FXR	Other
TAK-715	0.16741	0.84983	0.84983	NA	NA	3.9782	NA	NA	3.70342	DDX21_EXPRESSION_median	0.0721057	0.425002	0.425002	-1.31101	4.49646	3.18545	-1.51056	4.77363	3.26307	DDX21_quantile	p38alpha, p38beta	JNK and p38 signaling
Talazoparib	0.316386	0.84983	0.84983	NA	NA	NA	NA	NA	NA	DDX21_EXPRESSION_median	0.382867	0.700508	0.700508	NA	3.01336	NA	NA	3.08167	NA	DDX21_quantile	PARP1, PARP2	Genome integrity
Tamoxifen	0.649511	0.896325	0.896325	0.0774317	4.10605	4.18348	0.043602	4.17501	4.21861	DDX21_EXPRESSION_median	0.151981	0.499367	0.499367	-0.389451	4.21322	3.82377	-0.256868	4.13335	3.87648	DDX21_quantile	ESR1	Hormone-related
Tanespimycin	0.611412	0.896325	0.896325	-0.283726	-0.850934	-1.13466	-0.258842	-0.831792	-1.09063	DDX21_EXPRESSION_median	0.612587	0.853768	0.853768	-0.627705	-0.538157	-1.16586	-0.035609	-0.895013	-0.930622	DDX21_quantile	HSP90	Protein stability and degradation
TANK_1366	0.936162	0.992068	0.992068	-0.0367815	3.07682	3.04003	0.52669	2.76578	3.29247	DDX21_EXPRESSION_median	0.955089	0.980672	0.980672	-0.166897	3.09261	2.92572	0.577348	2.64692	3.22427	DDX21_quantile	Tankyrase 1/2 (PARP5a, PARP5b)	Genome integrity
Temozolomide	1	1	1	NA	NA	6.02956	NA	NA	5.92297	DDX21_EXPRESSION_median	0.612587	0.853768	0.853768	-0.0377783	5.73576	5.69798	-0.104451	5.85461	5.75016	DDX21_quantile	DNA alkylating agent	DNA replication
Temsirolimus	0.688522	0.923358	0.923358	0.447066	-0.659323	-0.212257	0.760172	-0.47732	0.282852	DDX21_EXPRESSION_median	0.694328	0.890495	0.890495	0.594132	-1.33029	-0.736153	0.462274	-1.2452	-0.78293	DDX21_quantile	MTOR	PI3K/MTOR signaling
Tenovin-6	0.458521	0.862042	0.862042	NA	NA	2.53144	NA	NA	2.30061	DDX21_EXPRESSION_median	0.463403	0.736747	0.736747	-0.793716	3.2496	2.45588	0.0817035	2.19102	2.27273	DDX21_quantile	SIRT	Chromatin histone acetylation
TGX221	0.4	0.84983	0.84983	NA	NA	NA	NA	NA	NA	DDX21_EXPRESSION_median	0.4	0.700508	0.700508	NA	NA	NA	NA	NA	NA	DDX21_quantile	PI3Kbeta	PI3K/MTOR signaling
Thapsigargin	0.331649	0.84983	0.84983	NA	NA	NA	NA	NA	NA	DDX21_EXPRESSION_median	0.231857	0.56731	0.56731	-1.70153	-1.78654	-3.48807	-2.49946	-2.03501	-4.53447	DDX21_quantile	SERCA	Other
THZ-2-102-1	0.260448	0.84983	0.84983	NA	NA	NA	NA	NA	NA	DDX21_EXPRESSION_median	0.0973193	0.425002	0.425002	NA	-0.177896	NA	NA	-0.940217	NA	DDX21_quantile	CDK7	Cell cycle
THZ-2-49	0.211497	0.84983	0.84983	NA	NA	NA	NA	NA	NA	DDX21_EXPRESSION_median	0.0938617	0.425002	0.425002	-1.8085	3.18053	1.37203	-2.2983	3.25872	0.960419	DDX21_quantile	CDK9	Cell cycle
Tipifarnib	0.606318	0.896325	0.896325	NA	NA	NA	NA	NA	NA	DDX21_EXPRESSION_median	0.396892	0.700508	0.700508	-1.03231	2.80851	1.7762	-0.60143	2.28138	1.67995	DDX21_quantile	Farnesyl-transferase (FNTA)	Other
Tivozanib	0.0821299	0.84983	0.84983	NA	NA	0.355464	NA	NA	0.57794	DDX21_EXPRESSION_median	0.0721057	0.425002	0.425002	-0.754922	0.869573	0.114651	-0.226893	0.600451	0.373557	DDX21_quantile	VEGFR1, VEGFR2, VEGFR3	RTK signaling
TL-1-85	0.105614	0.84983	0.84983	NA	NA	3.288	NA	NA	3.51995	DDX21_EXPRESSION_median	0.189277	0.548745	0.548745	-1.03257	3.95223	2.91966	-0.647894	3.43723	2.78934	DDX21_quantile	TAK	Other, kinases
TL-2-105	0.276668	0.84983	0.84983	NA	NA	4.07839	NA	NA	4.00873	DDX21_EXPRESSION_median	0.120591	0.452214	0.452214	-1.09905	4.52972	3.43067	-1.29034	4.5656	3.27526	DDX21_quantile	not defined	Other
Torin 2	0.312788	0.84983	0.84983	NA	NA	0.583342	NA	NA	0.895875	DDX21_EXPRESSION_median	0.778866	0.939541	0.939541	-0.226233	0.0363217	-0.189911	-0.179739	-0.295403	-0.475143	DDX21_quantile	mTOR	PI3K/MTOR signaling
Tozasertib	0.4	0.84983	0.84983	NA	NA	NA	NA	NA	NA	DDX21_EXPRESSION_median	0.4	0.700508	0.700508	NA	NA	NA	NA	NA	NA	DDX21_quantile	AURKA, AURKB, AURKC, others	Mitosis
TPCA-1	0.864617	0.971638	0.971638	NA	NA	3.01307	NA	NA	2.89918	DDX21_EXPRESSION_median	0.955089	0.980672	0.980672	-0.175764	2.85838	2.68261	0.130895	2.35533	2.48623	DDX21_quantile	IKK2	Other, kinases
Trametinib	0.276668	0.84983	0.84983	NA	NA	-2.44083	NA	NA	-2.99726	DDX21_EXPRESSION_median	0.335664	0.681201	0.681201	0.565749	-3.10624	-2.54049	0.81875	-4.12248	-3.30373	DDX21_quantile	MEK1, MEK2	ERK MAPK signaling
Tretinoin	0.40951	0.84983	0.84983	NA	4.9902	NA	NA	5.10346	NA	DDX21_EXPRESSION_median	0.164918	0.536763	0.536763	NA	4.8826	NA	NA	5.08345	NA	DDX21_quantile	Retinoic acid	Other
Trichostatin A	0.276668	0.84983	0.84983	NA	NA	-2.01076	NA	NA	-2.0162	DDX21_EXPRESSION_median	0.396892	0.700508	0.700508	-0.821992	-1.33063	-2.15263	-0.461877	-1.90345	-2.36532	DDX21_quantile	HDAC	Chromatin histone acetylation
TTK_3146	0.538245	0.896325	0.896325	0.111437	2.56126	2.6727	-0.465838	2.5053	2.03946	DDX21_EXPRESSION_median	0.0938617	0.425002	0.425002	-0.531156	2.49784	1.96668	-0.408273	2.31194	1.90366	DDX21_quantile	TTK	Mitosis
Tubastatin A	0.424429	0.84983	0.84983	NA	NA	4.67451	NA	NA	4.72285	DDX21_EXPRESSION_median	0.280963	0.621362	0.621362	-0.722756	4.98377	4.26102	-0.540303	5.07789	4.53758	DDX21_quantile	HDAC1, HDAC6, HDAC8	Chromatin histone acetylation
TW 37	0.611412	0.896325	0.896325	-0.853916	0.933857	0.0799415	0.304725	0.0623255	0.367051	DDX21_EXPRESSION_median	0.955089	0.980672	0.980672	-1.04966	0.501093	-0.548568	0.407198	-0.746175	-0.338977	DDX21_quantile	BCL2, BCL-XL, MCL1	Apoptosis regulation
TWS119	1	1	1	NA	NA	3.34393	NA	NA	3.48475	DDX21_EXPRESSION_median	0.280963	0.621362	0.621362	-1.29548	3.99682	2.70134	-0.928473	3.58794	2.65946	DDX21_quantile	GSK3	WNT signaling
UNC0638	0.574293	0.896325	0.896325	-0.330671	3.98717	3.6565	-0.615855	4.26335	3.6475	DDX21_EXPRESSION_median	1	1	1	-0.0656476	3.46545	3.3998	0.33407	3.17316	3.50723	DDX21_quantile	G9a and GLP methyltransferases	Chromatin histone methylation
UNC0642	0.766432	0.94962	0.94962	NA	NA	NA	NA	NA	NA	DDX21_EXPRESSION_median	0.937229	0.980672	0.980672	NA	NA	NA	NA	NA	NA	DDX21_quantile	G9a(EHMT2), GLP(EHMT1)	Chromatin histone methylation
UNC1215	0.864617	0.971638	0.971638	NA	NA	2.77923	NA	NA	2.73331	DDX21_EXPRESSION_median	0.778866	0.939541	0.939541	0.0689238	2.50473	2.57365	-0.177387	2.69357	2.51619	DDX21_quantile	L3MBTL3	Chromatin other
Veliparib	0.168349	0.84983	0.84983	-0.41594	4.41443	3.99849	-0.298325	4.55469	4.25637	DDX21_EXPRESSION_median	0.0205128	0.406828	0.406828	-0.897293	4.42683	3.52954	-0.91122	4.56879	3.65757	DDX21_quantile	PARP1, PARP2	Genome integrity
Venotoclax	0.424429	0.84983	0.84983	NA	NA	1.32748	NA	NA	1.23759	DDX21_EXPRESSION_median	0.189277	0.548745	0.548745	-0.352134	1.51222	1.16008	-0.187557	1.40843	1.22087	DDX21_quantile	BCL-2 selective	Apoptosis regulation
Vinblastine	0.437102	0.84983	0.84983	-0.455774	-2.7414	-3.19718	-0.842166	-2.63343	-3.47559	DDX21_EXPRESSION_median	0.231857	0.56731	0.56731	-0.911481	-2.77652	-3.688	-1.57028	-2.37746	-3.94773	DDX21_quantile	Microtubule destabiliser	Mitosis
Vinorelbine	0.299986	0.84983	0.84983	NA	NA	NA	NA	NA	NA	DDX21_EXPRESSION_median	0.231857	0.56731	0.56731	-1.18098	-2.90024	-4.08122	-1.80452	-3.33655	-5.14107	DDX21_quantile	Microtubule destabiliser	Mitosis
Vismodegib	0.151872	0.84983	0.84983	-0.49972	4.94438	4.44466	-0.510663	5.09614	4.58548	DDX21_EXPRESSION_median	0.0721057	0.425002	0.425002	-0.82837	4.95774	4.12937	-0.563032	4.98486	4.42183	DDX21_quantile	SMO	Other
VNLG/124	0.16741	0.84983	0.84983	NA	NA	4.07708	NA	NA	3.87493	DDX21_EXPRESSION_median	0.0400932	0.406828	0.406828	-0.49838	4.26091	3.76253	-0.434405	4.27328	3.83887	DDX21_quantile	HDAC,RAR	Chromatin histone acetylation
Vorinostat	0.320322	0.84983	0.84983	-0.316392	1.45733	1.14094	-0.234647	1.408	1.17335	DDX21_EXPRESSION_median	0.0400932	0.406828	0.406828	-0.658542	1.44854	0.789998	-0.461051	1.43738	0.976331	DDX21_quantile	HDAC inhibitor Class I, IIa, IIb, IV	Chromatin histone acetylation
Voxtalisib	0.251772	0.84983	0.84983	NA	NA	4.84366	NA	NA	4.86985	DDX21_EXPRESSION_median	0.151981	0.499367	0.499367	-0.670943	5.36165	4.69071	-0.651763	5.43261	4.78085	DDX21_quantile	PI3K (class 1), DNAPK, MTOR	PI3K/MTOR signaling
VX-11e	0.954685	0.992068	0.992068	NA	NA	1.17545	NA	NA	1.32069	DDX21_EXPRESSION_median	0.866511	0.949036	0.949036	-0.0170266	1.0104	0.993369	0.0628935	1.12815	1.19104	DDX21_quantile	ERK2	ERK MAPK signaling
VX-702	0.437102	0.84983	0.84983	-0.311702	3.37051	3.05881	-0.229799	3.41908	3.18928	DDX21_EXPRESSION_median	0.120591	0.452214	0.452214	-0.722311	3.38478	2.66247	-0.337718	3.36497	3.02725	DDX21_quantile	p38	JNK and p38 signaling
Wee1 Inhibitor	0.424429	0.84983	0.84983	NA	NA	2.53997	NA	NA	2.51097	DDX21_EXPRESSION_median	0.141858	0.499367	0.499367	NA	NA	1.99356	NA	NA	1.8038	DDX21_quantile	WEE1, CHEK1	Cell cycle
WH-4-023	0.4	0.84983	0.84983	NA	NA	NA	NA	NA	NA	DDX21_EXPRESSION_median	0.4	0.700508	0.700508	NA	NA	NA	NA	NA	NA	DDX21_quantile	SRC, LCK	Other, kinases
WHI-P97	0.690511	0.923358	0.923358	NA	NA	4.47521	NA	NA	4.65651	DDX21_EXPRESSION_median	0.778866	0.939541	0.939541	-0.43761	4.57541	4.1378	-0.18628	4.70495	4.51867	DDX21_quantile	JAK3	Other, kinases
Wnt-C59	1	1	1	NA	NA	2.90975	NA	NA	3.02808	DDX21_EXPRESSION_median	0.280963	0.621362	0.621362	-0.409391	3.10378	2.69439	-0.194744	3.0774	2.88266	DDX21_quantile	PORCN	WNT signaling
WYE-125132	0.0409536	0.84983	0.84983	NA	NA	1.84469	NA	NA	2.47578	DDX21_EXPRESSION_median	0.396892	0.700508	0.700508	0.44959	0.674896	1.12449	0.882348	0.177361	1.05971	DDX21_quantile	mTOR	PI3K/MTOR signaling
WZ-1-84	0.857143	0.971638	0.971638	NA	NA	NA	NA	NA	NA	DDX21_EXPRESSION_median	0.857143	0.949036	0.949036	NA	NA	NA	NA	NA	NA	DDX21_quantile	BMX	Other, kinases
WZ3105	0.331136	0.84983	0.84983	NA	NA	0.407329	NA	NA	0.934531	DDX21_EXPRESSION_median	0.463403	0.736747	0.736747	-0.667549	1.0389	0.371348	-1.82324	1.97588	0.152641	DDX21_quantile	SRC, ROCK2, NTRK2, FLT3, IRAK1, others	Other
XAV939	0.954685	0.992068	0.992068	NA	NA	4.05199	NA	NA	3.948	DDX21_EXPRESSION_median	0.866511	0.949036	0.949036	-0.146428	4.07877	3.93234	-0.281254	4.06285	3.7816	DDX21_quantile	TNKS1, TNKS2	WNT signaling
XMD11-85h	0.0172119	0.84983	0.84983	NA	NA	NA	NA	NA	NA	DDX21_EXPRESSION_median	0.0530303	0.425002	0.425002	NA	4.35579	NA	NA	4.31822	NA	DDX21_quantile	BRSK2, FLT4, MARK4, PRKCD, RET, SRPK1	Other, kinases
XMD13-2	0.228426	0.84983	0.84983	NA	NA	3.347	NA	NA	3.35156	DDX21_EXPRESSION_median	0.0721057	0.425002	0.425002	-1.24495	4.09074	2.84579	-0.576945	3.74036	3.16341	DDX21_quantile	RIPK1	Apoptosis regulation
XMD14-99	0.133883	0.84983	0.84983	NA	NA	4.39937	NA	NA	4.50002	DDX21_EXPRESSION_median	0.0938617	0.425002	0.425002	-0.760478	4.91147	4.15099	-0.498219	4.74181	4.24359	DDX21_quantile	ALK, CDK7, LTK, others	Other, kinases
XMD15-27	0.331136	0.84983	0.84983	NA	NA	4.71731	NA	NA	4.927	DDX21_EXPRESSION_median	0.280963	0.621362	0.621362	-0.765205	5.13875	4.37354	-0.434569	4.87988	4.44531	DDX21_quantile	CAMK2	Other, kinases
XMD8-85	0.0571429	0.84983	0.84983	NA	NA	NA	NA	NA	NA	DDX21_EXPRESSION_median	0.0571429	0.425002	0.425002	NA	NA	NA	NA	NA	NA	DDX21_quantile	ERK5, BET	Other
XMD8-92	0.0172119	0.84983	0.84983	NA	NA	NA	NA	NA	NA	DDX21_EXPRESSION_median	0.0728438	0.425002	0.425002	NA	3.76215	NA	NA	3.78782	NA	DDX21_quantile	MAPK7	ERK MAPK signaling
Y-39983	0.776211	0.94962	0.94962	NA	NA	4.58535	NA	NA	4.81866	DDX21_EXPRESSION_median	0.396892	0.700508	0.700508	-0.514769	4.37577	3.861	-0.126004	4.01037	3.88436	DDX21_quantile	ROCK	Cytoskeleton
YK-4-279	0.459756	0.862042	0.862042	NA	NA	NA	NA	NA	NA	DDX21_EXPRESSION_median	0.555556	0.833333	0.833333	NA	NA	NA	NA	NA	NA	DDX21_quantile	RNA helicase A	Other
YM201636	0.820139	0.971638	0.971638	NA	NA	2.71692	NA	NA	2.91665	DDX21_EXPRESSION_median	0.955089	0.980672	0.980672	-0.0614731	2.42439	2.36292	-0.211873	2.34939	2.13752	DDX21_quantile	PIKFYVE	PI3K/MTOR signaling
Z-LLNle-CHO	0.628571	0.896325	0.896325	NA	NA	NA	NA	NA	NA	DDX21_EXPRESSION_median	0.628571	0.853768	0.853768	NA	NA	NA	NA	NA	NA	DDX21_quantile	gamma-secretase	Other
ZG-10	0.548962	0.896325	0.896325	NA	NA	NA	NA	NA	NA	DDX21_EXPRESSION_median	0.901515	0.980672	0.980672	NA	2.39748	NA	NA	1.52647	NA	DDX21_quantile	JNK1	JNK and p38 signaling
Zibotentan	0.776211	0.94962	0.94962	NA	NA	5.66435	NA	NA	5.64168	DDX21_EXPRESSION_median	0.463403	0.736747	0.736747	-0.195471	5.63674	5.44127	-0.207312	5.72257	5.51526	DDX21_quantile	Endothelin-1 receptor (EDNRA)	Other
ZM447439	0.851719	0.971638	0.971638	-0.298397	2.38498	2.08659	0.059115	2.30091	2.36002	DDX21_EXPRESSION_median	0.151981	0.499367	0.499367	-1.18596	2.40358	1.21762	-1.88419	2.72186	0.83767	DDX21_quantile	AURKA, AURKB	Mitosis
ZSTK474	0.954685	0.992068	0.992068	NA	NA	1.57674	NA	NA	1.28408	DDX21_EXPRESSION_median	0.463403	0.736747	0.736747	-0.278154	1.43605	1.15789	-0.345185	1.54232	1.19713	DDX21_quantile	PI3K (class 1)	PI3K/MTOR signaling
